# Supplementary material for: Metabolic Regulation of SARS-CoV-2 Infection
Source: Research Square preprint supplement (doi:10.21203/rs.3.rs-770724/v1), 2021-08-12
Supplement: Supplementary file 1 [file 594d8e2336226bb5b50543dd.xlsx]

## Sheet: Legend
Field	Explanation
Gene_name	Gene name
baseMean	Average of the normalized count values over all samples
log2FoldChange	Fold expresion change Infected vs Control (logarithmic scale to base 2)
lfcSE	Standard error estimate for the log2FoldChange
pvalue	Wald test p-values
padj	Benjamini-Hochberg adjusted p-values (Multiple comparisons adjustement)
status	Gene Expression status (Low: No test performed due to Low counts; Outlier: No test performed due to extreme count outlier; OK: Wald test performed)

## Sheet: GSE147507_NBEC
Gene_name	baseMean	log2FoldChange	lfcSE	pvalue	padj	status
DDX11L1	0	NaN	NaN	NaN	NaN	Low
WASH7P	29.1302	0.0858964	0.275818	0.755478	0.931576	OK
FAM138A	0	NaN	NaN	NaN	NaN	Low
FAM138F	0	NaN	NaN	NaN	NaN	Low
OR4F5	0	NaN	NaN	NaN	NaN	Low
LOC729737	130.415	0.126545	0.207741	0.542425	0.850325	OK
LOC100132287	0	NaN	NaN	NaN	NaN	Low
LOC100132062	0	NaN	NaN	NaN	NaN	Low
LOC100133331	25.8917	-0.00218965	0.256976	0.993201	0.998423	OK
OR4F29	0	NaN	NaN	NaN	NaN	Low
OR4F16	0	NaN	NaN	NaN	NaN	Low
OR4F3	0	NaN	NaN	NaN	NaN	Low
LOC100288069	19.8557	0.0584425	0.275683	0.832114	0.954237	OK
LINC00115	14.1578	-0.160156	0.284251	0.573142	0.862366	OK
LOC643837	117.328	0.274362	0.165068	0.0964908	0.443954	OK
FAM41C	0.359045	0.0129244	0.092507	0.888887	NaN	Low
LOC100130417	0.210173	-0.0447319	0.0702204	0.524111	NaN	Low
SAMD11	20.3997	0.431121	0.287212	0.133341	0.508591	OK
NOC2L	2248.4	0.176103	0.0875265	0.0442201	0.310561	OK
KLHL17	140.952	0.111337	0.240014	NaN	NaN	Outlier
PLEKHN1	203.205	-0.0412291	0.162072	0.799197	0.943116	OK
C1orf170	4.04372	-0.174286	0.241656	0.470778	NaN	Low
HES4	39.0815	-0.425794	0.260189	0.101738	0.452868	OK
ISG15	71.4466	0.622776	0.232763	0.00745998	0.109247	OK
AGRN	3697.42	-0.0223872	0.181697	NaN	NaN	Outlier
RNF223	5.96672	-0.186191	0.273077	0.49535	NaN	Low
C1orf159	70.9602	0.00176219	0.259498	0.994582	0.998851	OK
LOC254099	0	NaN	NaN	NaN	NaN	Low
MIR200B	0	NaN	NaN	NaN	NaN	Low
MIR200A	1.73474	0.106066	0.201437	0.598509	NaN	Low
MIR429	6.29925	-0.387026	0.276322	0.161323	NaN	Low
TTLL10	0.0774984	0.0195616	0.0472692	0.678995	NaN	Low
TNFRSF18	0.587223	0.0847376	0.130461	0.515999	NaN	Low
TNFRSF4	0.301073	0.0826836	0.0958686	0.38843	NaN	Low
SDF4	1887.09	0.147636	0.147198	NaN	NaN	Outlier
B3GALT6	197.218	-0.142599	0.152963	0.351209	0.741504	OK
FAM132A	2.74815	0.0533031	0.229137	0.816053	NaN	Low
UBE2J2	330.229	-0.0327466	0.123903	0.791555	0.94227	OK
SCNN1D	11.3109	-0.151842	0.285681	0.595066	0.872923	OK
ACAP3	387.81	0.0060804	0.14957	0.967573	0.992273	OK
PUSL1	99.0289	0.00884157	0.222953	0.968367	0.99254	OK
CPSF3L	682.157	0.179136	0.133068	0.17824	0.575923	OK
GLTPD1	143.968	0.16224	0.177905	0.361797	0.746718	OK
TAS1R3	2.39245	-0.459599	0.208992	0.0278696	NaN	Low
DVL1	705.731	0.0521794	0.191739	NaN	NaN	Outlier
MXRA8	21.6235	0.171382	0.286613	0.54987	0.852525	OK
AURKAIP1	530.715	0.20229	0.135987	0.136862	0.514739	OK
CCNL2	1225.25	0.0773409	0.127766	0.544957	0.850959	OK
LOC148413	194.317	-0.0350008	0.150825	0.81649	0.947452	OK
MRPL20	707.459	0.101914	0.137355	0.458101	0.805281	OK
ANKRD65	302.536	-0.144931	0.16012	0.365393	0.749401	OK
TMEM88B	0.0774984	0.0195616	0.0472692	0.678995	NaN	Low
VWA1	299.31	0.12532	0.225363	NaN	NaN	Outlier
ATAD3C	15.442	0.252045	0.280014	0.368058	0.750028	OK
ATAD3B	258.316	0.256083	0.200876	NaN	NaN	Outlier
ATAD3A	259.885	0.333198	0.166584	0.0454812	0.3142	OK
TMEM240	0.635585	-0.0462302	0.124908	0.711298	NaN	Low
SSU72	1162.87	0.0334142	0.101907	0.742995	0.928288	OK
C1orf233	39.6441	0.0632149	0.270989	0.815548	0.947393	OK
MIB2	133.633	-0.0748649	0.238363	NaN	NaN	Outlier
MMP23B	0	NaN	NaN	NaN	NaN	Low
MMP23A	0	NaN	NaN	NaN	NaN	Low
CDK11B	282.564	0.291179	0.150791	0.0534822	0.340092	OK
SLC35E2B	436.257	-0.00161068	0.119214	0.98922	0.996989	OK
CDK11A	123.247	0.383	0.158763	0.0158477	0.171028	OK
SLC35E2	123.383	-0.177118	0.156266	0.257028	0.659266	OK
NADK	456.497	0.100896	0.112654	0.370451	0.752205	OK
GNB1	9536.62	0.100341	0.0794085	0.206373	0.610163	OK
CALML6	7.04648	0.161883	0.281111	0.564705	NaN	Low
TMEM52	3.51725	0.128625	0.225712	0.568771	NaN	Low
KIAA1751	0.262307	-0.0568665	0.0789633	0.471424	NaN	Low
GABRD	0	NaN	NaN	NaN	NaN	Low
PRKCZ	714.689	-0.0154593	0.0991842	0.876139	0.967758	OK
C1orf86	195.68	0.000215444	0.183481	0.999063	0.999829	OK
SKI	790.037	0.174016	0.139484	0.212189	0.617204	OK
MORN1	36.2873	0.254361	0.245037	0.299246	0.70144	OK
LOC100129534	22.8121	-0.0977076	0.271752	0.719186	0.917857	OK
RER1	1735.67	0.043999	0.0766607	0.566005	0.859242	OK
PEX10	167.621	-0.289396	0.147449	0.049682	0.326821	OK
PLCH2	1254.55	0.152426	0.152879	0.318746	0.71831	OK
PANK4	312.806	0.259968	0.13979	0.0629276	0.368119	OK
HES5	1.91637	-0.0664169	0.206983	0.7483	NaN	Low
LOC115110	6.47191	-0.130236	0.251503	0.604577	NaN	Low
LOC100133445	4.96957	-0.127311	0.264304	0.63003	NaN	Low
TNFRSF14	93.1234	-0.260099	0.209009	0.213338	0.618951	OK
FAM213B	419.203	0.0580684	0.128389	0.651062	0.891088	OK
MMEL1	1.9855	0.157893	0.201263	0.432741	NaN	Low
TTC34	0	NaN	NaN	NaN	NaN	Low
ACTRT2	0	NaN	NaN	NaN	NaN	Low
FLJ42875	1.64693	0.0378112	0.186409	0.83926	NaN	Low
PRDM16	31.9889	-0.185592	0.248825	0.455744	0.804459	OK
MIR4251	0	NaN	NaN	NaN	NaN	Low
ARHGEF16	275.565	0.196172	0.179886	0.275477	0.678838	OK
MEGF6	68.6041	-0.241863	0.211931	0.253772	0.657359	OK
MIR551A	0	NaN	NaN	NaN	NaN	Low
TPRG1L	867.246	0.0872805	0.0974263	0.370326	0.752205	OK
WRAP73	148.066	0.0683925	0.177436	0.699905	0.910033	OK
TP73	10.967	-0.428459	0.286542	0.134842	0.511472	OK
TP73-AS1	209.788	0.0568516	0.152781	0.709809	0.91455	OK
CCDC27	0	NaN	NaN	NaN	NaN	Low
SMIM1	7.32428	0.303782	0.28175	0.280946	NaN	Low
LRRC47	601.816	0.174626	0.102348	0.0879698	0.427007	OK
CEP104	653.731	0.0550107	0.102541	0.591629	0.871004	OK
DFFB	98.63	0.306698	0.175329	0.0802446	0.411272	OK
C1orf174	214.143	0.0950193	0.131714	0.470659	0.811933	OK
LOC100133612	2.90997	-0.393993	0.237918	0.0977218	NaN	Low
LOC728716	0	NaN	NaN	NaN	NaN	Low
LOC284661	0	NaN	NaN	NaN	NaN	Low
AJAP1	17.6177	-0.526655	0.283281	0.0630088	0.368119	OK
MIR4417	0	NaN	NaN	NaN	NaN	Low
MIR4689	0	NaN	NaN	NaN	NaN	Low
NPHP4	132.147	0.33385	0.161158	0.038306	0.287006	OK
KCNAB2	40.4816	0.0119508	0.227113	0.958034	0.989777	OK
CHD5	3.21941	-0.0122588	0.229968	0.957488	NaN	Low
RPL22	5137	0.250531	0.0882864	0.00454392	0.0796846	OK
RNF207	304.107	0.367137	0.160729	0.0223598	0.210047	OK
ICMT	1570.5	0.0122799	0.0799612	0.877946	0.968212	OK
HES3	0	NaN	NaN	NaN	NaN	Low
GPR153	933.333	0.241464	0.112137	0.0312959	0.254639	OK
ACOT7	829.619	0.20584	0.148539	0.165817	0.559037	OK
HES2	5313.95	0.0490627	0.0752086	0.514172	0.837588	OK
ESPN	609.885	-0.358526	0.153688	0.0196581	0.194264	OK
MIR4252	0	NaN	NaN	NaN	NaN	Low
TNFRSF25	238.627	0.0626044	0.179205	0.72683	0.922109	OK
PLEKHG5	1261.52	0.0960489	0.147239	NaN	NaN	Outlier
NOL9	328.531	-0.0589795	0.128829	0.647087	0.890382	OK
TAS1R1	0.301073	0.0826836	0.0958686	0.38843	NaN	Low
ZBTB48	180.908	0.100042	0.162159	0.537274	0.847872	OK
KLHL21	619.573	0.0830454	0.12756	0.515026	0.838099	OK
PHF13	238.86	-0.0187355	0.141297	0.894513	0.9737	OK
THAP3	106.462	0.282268	0.187783	0.132798	0.507902	OK
DNAJC11	1182.65	0.231917	0.101888	0.0228337	0.212695	OK
CAMTA1	265.082	0.0359713	0.137113	0.793054	0.942746	OK
VAMP3	1829.34	-0.0333563	0.0847652	0.69394	0.907282	OK
PER3	138.588	-0.468009	0.154651	0.00247624	0.0532156	OK
UTS2	0	NaN	NaN	NaN	NaN	Low
TNFRSF9	8.09948	-0.151301	0.28606	0.596865	NaN	Low
PARK7	2116.16	0.104281	0.0782887	0.182856	0.583083	OK
ERRFI1	2327.31	0.374384	0.0976138	0.000125381	0.00554523	OK
SLC45A1	3.70692	0.0298972	0.244144	0.902537	NaN	Low
RERE	1243.99	0.0125789	0.102917	0.902722	0.975834	OK
ENO1	33946.4	0.234049	0.0875263	0.0074943	0.109329	OK
ENO1-AS1	0.752505	-0.0571254	0.116313	0.623332	NaN	Low
CA6	0.606463	0.180947	0.138444	0.191209	NaN	Low
SLC2A7	0	NaN	NaN	NaN	NaN	Low
SLC2A5	16.9097	-0.412348	0.277883	0.137838	0.51731	OK
GPR157	82.5642	0.227446	0.248919	NaN	NaN	Outlier
MIR34A	2.98736	0.00137747	0.23769	0.995376	NaN	Low
H6PD	494.71	-0.106898	0.0981649	0.276171	0.679372	OK
SPSB1	800.525	-0.100377	0.0847303	0.236151	0.639781	OK
SLC25A33	23.1201	0.251008	0.265166	0.343839	0.73747	OK
TMEM201	76.9742	0.107353	0.200618	0.592575	0.871433	OK
PIK3CD	402.799	0.28481	0.107949	0.00833007	0.117161	OK
C1orf200	0	NaN	NaN	NaN	NaN	Low
CLSTN1	9636.69	-0.00553019	0.0786111	0.943916	0.98653	OK
CTNNBIP1	435.744	-0.143377	0.111001	0.19647	0.6007	OK
LZIC	410.688	-0.0503003	0.133969	0.707317	0.913208	OK
NMNAT1	503.032	0.197417	0.101685	0.0522038	0.336274	OK
RBP7	12.2645	0.320952	0.287164	0.263712	0.667175	OK
UBE4B	1161.46	-0.12577	0.0826306	0.127989	0.499705	OK
KIF1B	1631.23	0.0236624	0.0780519	0.761766	0.932569	OK
PGD	3596.93	0.207567	0.108866	0.0565682	0.350899	OK
APITD1-CORT	0	NaN	NaN	NaN	NaN	Low
APITD1	0.903218	0.201515	0.14423	0.162358	NaN	Low
CORT	0.197521	-0.0428081	0.0687346	0.533415	NaN	Low
DFFA	1026.28	0.0557445	0.106136	0.599433	0.875282	OK
PEX14	471.158	0.0400951	0.155364	0.796351	0.943116	OK
CASZ1	357.972	-0.139186	0.149256	0.351062	0.741469	OK
C1orf127	1.20832	0.276569	0.165972	0.0956404	NaN	Low
TARDBP	2658.9	-0.0319323	0.102782	0.756045	0.931711	OK
MASP2	0.561169	-0.0110557	0.125567	0.92984	NaN	Low
SRM	445.864	0.378659	0.117587	0.00128079	0.0329171	OK
EXOSC10	1285.6	0.0964234	0.0968694	0.319543	0.71831	OK
MTOR	1713.97	0.165078	0.0852873	0.0529228	0.33814	OK
MTOR-AS1	0	NaN	NaN	NaN	NaN	Low
ANGPTL7	0	NaN	NaN	NaN	NaN	Low
UBIAD1	222.998	0.120848	0.131345	0.357532	0.743782	OK
PTCHD2	12.5963	0.148092	0.282069	0.59957	0.875282	OK
FBXO2	933.595	0.0929776	0.15542	NaN	NaN	Outlier
FBXO44	504.647	0.0510811	0.11417	0.654578	0.891088	OK
FBXO6	125.501	0.208868	0.173074	0.227504	0.629418	OK
MAD2L2	117.344	0.0647487	0.182492	0.722737	0.920495	OK
DRAXIN	0.275019	-0.0219167	0.085658	0.798057	NaN	Low
AGTRAP	768.21	-0.024956	0.150823	0.868578	0.96596	OK
MTHFR	303.567	0.00564721	0.110095	0.959091	0.989955	OK
CLCN6	256.097	0.184722	0.121152	0.12733	0.498241	OK
NPPA-AS1	6.52142	0.201954	0.277615	0.466944	NaN	Low
NPPA	0.675163	0.0562016	0.115737	0.627251	NaN	Low
NPPB	0	NaN	NaN	NaN	NaN	Low
KIAA2013	602.885	0.00855639	0.131779	0.94823	0.987408	OK
PLOD1	2944.12	0.10722	0.102474	0.295416	0.69748	OK
MFN2	3413.92	0.0872203	0.0876443	0.319657	0.71831	OK
MIIP	148.031	0.110948	0.158263	0.483281	0.819079	OK
TNFRSF8	0	NaN	NaN	NaN	NaN	Low
TNFRSF1B	0.455783	0.0787465	0.0931144	0.397722	NaN	Low
MIR4632	0	NaN	NaN	NaN	NaN	Low
VPS13D	2130.75	0.000545494	0.0646665	0.99327	0.998423	OK
SNORA59B	0	NaN	NaN	NaN	NaN	Low
SNORA59A	0	NaN	NaN	NaN	NaN	Low
DHRS3	2436.96	-0.0627002	0.0940151	0.504826	0.831865	OK
AADACL4	0	NaN	NaN	NaN	NaN	Low
AADACL3	0	NaN	NaN	NaN	NaN	Low
C1orf158	0	NaN	NaN	NaN	NaN	Low
PRAMEF12	0	NaN	NaN	NaN	NaN	Low
PRAMEF1	0	NaN	NaN	NaN	NaN	Low
PRAMEF11	0	NaN	NaN	NaN	NaN	Low
LOC649330	0	NaN	NaN	NaN	NaN	Low
HNRNPCL1	0	NaN	NaN	NaN	NaN	Low
PRAMEF2	0	NaN	NaN	NaN	NaN	Low
PRAMEF4	0	NaN	NaN	NaN	NaN	Low
PRAMEF10	0	NaN	NaN	NaN	NaN	Low
PRAMEF8	0	NaN	NaN	NaN	NaN	Low
PRAMEF7	0	NaN	NaN	NaN	NaN	Low
PRAMEF6	0	NaN	NaN	NaN	NaN	Low
PRAMEF22	0	NaN	NaN	NaN	NaN	Low
PRAMEF5	0	NaN	NaN	NaN	NaN	Low
LOC440563	0	NaN	NaN	NaN	NaN	Low
PRAMEF3	0	NaN	NaN	NaN	NaN	Low
PRAMEF9	0	NaN	NaN	NaN	NaN	Low
PRAMEF15	0	NaN	NaN	NaN	NaN	Low
PRAMEF14	0	NaN	NaN	NaN	NaN	Low
PRAMEF13	0	NaN	NaN	NaN	NaN	Low
PRAMEF19	0	NaN	NaN	NaN	NaN	Low
PRAMEF18	0	NaN	NaN	NaN	NaN	Low
PRAMEF16	0	NaN	NaN	NaN	NaN	Low
PRAMEF20	0	NaN	NaN	NaN	NaN	Low
PRAMEF21	0	NaN	NaN	NaN	NaN	Low
PRAMEF17	0	NaN	NaN	NaN	NaN	Low
LRRC38	0	NaN	NaN	NaN	NaN	Low
PDPN	1393.94	0.306253	0.0765389	6.30043e-05	0.00318879	OK
PRDM2	1136.73	0.00101376	0.0954787	0.991529	0.997788	OK
KAZN	194.055	0.0634042	0.1584	0.688952	0.904213	OK
TMEM51-AS1	62.2618	0.149032	0.215454	0.489118	0.822724	OK
TMEM51	318.88	0.36434	0.124131	0.00333428	0.064906	OK
FHAD1	1.43833	0.0966031	0.181148	0.593837	NaN	Low
EFHD2	1468.2	0.400994	0.138508	NaN	NaN	Outlier
CTRC	0.227892	0.0456636	0.0717276	0.52437	NaN	Low
CELA2A	0	NaN	NaN	NaN	NaN	Low
CELA2B	0	NaN	NaN	NaN	NaN	Low
CASP9	110.681	-0.0234107	0.174841	0.893484	0.973246	OK
DNAJC16	576.242	-0.171835	0.130046	0.186386	0.586776	OK
AGMAT	17.6834	-0.306368	0.285088	0.282535	0.684297	OK
DDI2	102.448	0.00938289	0.199197	0.962431	0.990961	OK
RSC1A1	116.886	0.0132718	0.172148	0.938548	0.984352	OK
PLEKHM2	1191.6	0.0604985	0.124368	0.62665	0.883962	OK
SLC25A34	12.7276	0.180495	0.287064	0.529503	0.845112	OK
TMEM82	0	NaN	NaN	NaN	NaN	Low
FBLIM1	3188.15	0.156742	0.0796842	0.0491789	0.325187	OK
UQCRHL	93.9667	0.0767349	0.177899	0.666221	0.896063	OK
FLJ37453	17.5869	0.174134	0.27891	0.532405	0.846502	OK
SPEN	2777.87	0.0977913	0.0753807	0.194528	0.598585	OK
ZBTB17	291.09	0.311752	0.187305	NaN	NaN	Outlier
C1orf64	0	NaN	NaN	NaN	NaN	Low
HSPB7	2.34813	-0.0994815	0.227593	0.662037	NaN	Low
CLCNKA	0.232495	0.0520903	0.076326	0.494941	NaN	Low
CLCNKB	0.617866	-0.143897	0.122436	0.239882	NaN	Low
FAM131C	24.1972	-0.150699	0.270175	0.576992	0.864617	OK
EPHA2	2653.9	0.468668	0.122837	0.000135989	0.00575518	OK
ARHGEF19	88.2232	-0.128218	0.240235	0.593536	0.872385	OK
RSG1	22.1109	-0.409662	0.275109	0.136464	0.514144	OK
FBXO42	278.233	0.0170344	0.132949	0.898048	0.974397	OK
SZRD1	2238.49	0.112388	0.0927801	0.225765	0.628493	OK
SPATA21	0	NaN	NaN	NaN	NaN	Low
NECAP2	1074.56	0.313497	0.0907046	0.000547765	0.0173273	OK
CROCCP3	24.376	-0.172517	0.258317	0.50423	0.831554	OK
MIR3675	0	NaN	NaN	NaN	NaN	Low
NBPF1	399.192	-0.0169306	0.113843	0.881776	0.968923	OK
CROCCP2	80.9116	-0.0318929	0.219899	0.884684	0.97053	OK
MST1P2	17.8043	0.134775	0.273247	0.621848	0.881348	OK
ESPNP	0.154997	0.0363927	0.0641175	0.57031	NaN	Low
MST1L	8.18212	0.0810335	0.281653	0.773572	NaN	Low
CROCC	98.6293	0.0398487	0.185002	0.829459	0.953649	OK
MFAP2	1067.43	0.169584	0.111605	0.128637	0.500815	OK
ATP13A2	965.115	0.281955	0.143726	0.0497904	0.327187	OK
SDHB	1172.61	0.232927	0.0832915	0.00516552	0.0864405	OK
PADI2	57.9313	0.408579	0.204507	0.0457308	0.315232	OK
PADI1	410.182	0.233095	0.122397	0.0568553	0.351799	OK
PADI3	433.509	-0.601508	0.135167	8.58219e-06	0.000540199	OK
PADI4	0.784744	0.0414763	0.152911	0.786203	NaN	Low
PADI6	0.197521	-0.0428081	0.0687346	0.533415	NaN	Low
RCC2	3517.08	0.0622085	0.0860849	0.4699	0.811564	OK
ARHGEF10L	208.564	0.0262504	0.169594	0.876991	0.967758	OK
ACTL8	0	NaN	NaN	NaN	NaN	Low
IGSF21	0	NaN	NaN	NaN	NaN	Low
KLHDC7A	11.6712	-0.128231	0.286114	0.654022	0.891088	OK
PAX7	0.197521	-0.0428081	0.0687346	0.533415	NaN	Low
TAS1R2	0	NaN	NaN	NaN	NaN	Low
ALDH4A1	634.599	-0.0449032	0.147808	0.761285	0.932569	OK
MIR4695	0	NaN	NaN	NaN	NaN	Low
IFFO2	907.16	-0.137793	0.0880223	0.117483	0.481798	OK
UBR4	4197.13	0.146615	0.0596447	0.0139656	0.159126	OK
EMC1	1306.81	0.111708	0.0770912	0.147327	0.532609	OK
MRTO4	719.528	0.147817	0.128878	0.251401	0.654958	OK
AKR7L	1.98815	-0.126682	0.18213	0.486706	NaN	Low
AKR7A3	2.35882	-0.180453	0.218129	0.408081	NaN	Low
LOC100506730	63.1082	0.0880317	0.223989	0.694306	0.907282	OK
AKR7A2	459.225	-0.163427	0.102938	0.11237	0.471798	OK
PQLC2	159.655	0.0977683	0.158698	0.537852	0.848328	OK
CAPZB	3636.4	0.118883	0.0894692	0.183928	0.58375	OK
MINOS1	339.906	0.0229174	0.109622	0.834403	0.955113	OK
C1orf151-NBL1	0	NaN	NaN	NaN	NaN	Low
NBL1	2.13991	0.150513	0.191115	0.430957	NaN	Low
HTR6	0	NaN	NaN	NaN	NaN	Low
TMCO4	147.34	0.0573791	0.151553	0.704979	0.912119	OK
RNF186	0	NaN	NaN	NaN	NaN	Low
OTUD3	165.807	0.182511	0.167188	0.274986	0.678045	OK
PLA2G2E	0	NaN	NaN	NaN	NaN	Low
PLA2G2A	0	NaN	NaN	NaN	NaN	Low
PLA2G5	0	NaN	NaN	NaN	NaN	Low
PLA2G2D	0	NaN	NaN	NaN	NaN	Low
PLA2G2F	0.232495	0.0520903	0.076326	0.494941	NaN	Low
PLA2G2C	0	NaN	NaN	NaN	NaN	Low
UBXN10	5.55156	0.00838907	0.264498	0.974698	NaN	Low
VWA5B1	0	NaN	NaN	NaN	NaN	Low
LOC339505	0	NaN	NaN	NaN	NaN	Low
CAMK2N1	2054.81	-0.255019	0.0899313	0.00457245	0.0799696	OK
MUL1	756.313	0.0521147	0.0969528	0.590904	0.871001	OK
FAM43B	0	NaN	NaN	NaN	NaN	Low
CDA	939.91	0.468405	0.124903	0.000176733	0.00713841	OK
PINK1	1678.46	0.0563363	0.0803734	0.483346	0.819079	OK
DDOST	4329.97	0.0238249	0.0856039	0.78077	0.938967	OK
KIF17	5.76854	-0.18949	0.240872	0.431467	NaN	Low
SH2D5	182.711	0.00952791	0.179018	0.957554	0.989777	OK
HP1BP3	2337.36	-0.0380135	0.104756	0.716696	0.917318	OK
EIF4G3	3366.58	0.150827	0.0809554	0.0624492	0.36698	OK
ECE1	3105.34	0.158632	0.0953355	0.0961253	0.443435	OK
LOC100506801	1.52668	0.156016	0.200307	0.436046	NaN	Low
NBPF3	194.834	0.156987	0.148824	0.291494	0.692969	OK
ALPL	3.83897	0.169387	0.248563	0.495579	NaN	Low
RAP1GAP	42.8659	0.0659126	0.251752	0.793464	0.942838	OK
USP48	1588.4	-0.13808	0.093404	0.139326	0.519612	OK
LDLRAD2	30.4801	0.0105745	0.287045	NaN	NaN	Outlier
HSPG2	5026.3	0.103744	0.178583	NaN	NaN	Outlier
CELA3B	0.262307	-0.0568665	0.0789633	0.471424	NaN	Low
CELA3A	0	NaN	NaN	NaN	NaN	Low
LINC00339	29.3456	-0.0592876	0.255427	0.816451	0.947452	OK
CDC42	5120.14	-0.128299	0.0951999	0.177759	0.575082	OK
WNT4	134.083	0.696226	0.238241	NaN	NaN	Outlier
ZBTB40	772.565	0.0211397	0.0813365	0.794938	0.942868	OK
EPHA8	1.73051	-0.0460809	0.158121	0.770724	NaN	Low
C1QA	0	NaN	NaN	NaN	NaN	Low
C1QC	0	NaN	NaN	NaN	NaN	Low
C1QB	0	NaN	NaN	NaN	NaN	Low
EPHB2	1515.21	0.0252799	0.102627	0.805429	0.94391	OK
MIR4684	0.210173	-0.0447319	0.0702204	0.524111	NaN	Low
MIR4253	1.77524	-0.0127766	0.157809	0.935472	NaN	Low
LOC729059	0.430016	0.0164614	0.100104	0.869382	NaN	Low
KDM1A	1560.11	0.0581853	0.091963	0.526927	0.843784	OK
MIR3115	0	NaN	NaN	NaN	NaN	Low
LUZP1	3485.27	0.142232	0.0732995	0.0523276	0.336372	OK
HTR1D	1.80428	-0.0246958	0.17801	0.889662	NaN	Low
HNRNPR	5036.78	-0.136887	0.089227	0.124994	0.493534	OK
ZNF436	630.499	-0.236383	0.0989569	0.016906	0.178564	OK
C1orf213	20.2641	-0.475518	0.277905	0.0870659	0.426221	OK
TCEA3	37.8924	-0.225202	0.258748	0.384108	0.759321	OK
ASAP3	140.787	-0.189965	0.168546	0.259707	0.66331	OK
E2F2	6.22569	-0.102232	0.279809	0.714839	NaN	Low
ID3	844.016	-0.188497	0.125345	0.132625	0.507902	OK
MDS2	0	NaN	NaN	NaN	NaN	Low
RPL11	23340.7	0.0721227	0.0820898	0.379628	0.757268	OK
TCEB3	1587.55	0.259246	0.080809	0.00133598	0.0340168	OK
LOC100506963	23.6227	0.103972	0.269651	0.699808	0.910033	OK
PITHD1	391.235	-0.0220247	0.117334	0.851104	0.961118	OK
LYPLA2	1215.87	0.0961666	0.127809	0.451797	0.801183	OK
GALE	635.635	0.273319	0.108427	0.0117098	0.142915	OK
HMGCL	587.994	-0.0516221	0.13479	0.701733	0.910864	OK
FUCA1	464.158	-0.114983	0.117918	0.329504	0.728192	OK
CNR2	0	NaN	NaN	NaN	NaN	Low
MIR378F	0	NaN	NaN	NaN	NaN	Low
PNRC2	176.584	0.2713	0.171702	0.114092	0.475392	OK
SRSF10	908.151	0.045741	0.101005	0.650651	0.891007	OK
MYOM3	31.8397	0.161894	0.258029	0.53038	0.845855	OK
IL22RA1	58.5236	0.0600312	0.221672	0.786537	0.94087	OK
IFNLR1	196.365	-0.000788857	0.157351	0.996	0.998981	OK
LOC284632	0.227892	0.0456636	0.0717276	0.52437	NaN	Low
GRHL3	925.527	-0.0890556	0.109317	0.415272	0.779559	OK
STPG1	400.381	-0.0188152	0.111419	0.865899	0.964914	OK
NIPAL3	2225.57	0.0776055	0.0738177	0.293115	0.694961	OK
RCAN3AS	1.71929	0.0691	0.193534	0.721059	NaN	Low
RCAN3	238.492	-0.147046	0.132996	0.268884	0.673256	OK
NCMAP	5.70973	0.130774	0.26855	0.626286	NaN	Low
SRRM1	2897.93	0.124213	0.0734269	0.0907119	0.434129	OK
CLIC4	1579.58	-0.0171534	0.14582	NaN	NaN	Outlier
RUNX3	43.9561	0.285995	0.239806	0.233021	0.635731	OK
SYF2	1501.33	-0.113957	0.0784217	0.146186	0.531587	OK
C1orf63	304.237	-0.190763	0.154538	0.217051	0.622426	OK
RHD	0.605214	-0.142552	0.121906	0.242258	NaN	Low
TMEM50A	1631.58	-0.0251377	0.198801	NaN	NaN	Outlier
RHCE	2.04989	0.106056	0.206187	0.606995	NaN	Low
TMEM57	631.857	-0.0339934	0.103497	0.742572	0.928288	OK
LDLRAP1	704.297	-0.0842434	0.120429	0.484222	0.819372	OK
MAN1C1	20.703	-0.665726	0.27071	0.0139253	0.159	OK
SEPN1	2533.89	-0.0187409	0.101232	0.853128	0.961621	OK
MTFR1L	483.287	0.0628741	0.109129	0.564517	0.858658	OK
LOC646471	6.65169	0.144677	0.246188	0.556754	NaN	Low
AUNIP	78.3741	0.136545	0.230323	0.553288	0.854286	OK
PAQR7	2657	0.0211545	0.0970286	0.827411	0.952932	OK
STMN1	937.627	0.0865785	0.11275	0.442559	0.794444	OK
MIR3917	0	NaN	NaN	NaN	NaN	Low
PAFAH2	746.97	0.0194628	0.0895821	0.828004	0.953093	OK
EXTL1	0.783994	-0.0555121	0.138422	0.688393	NaN	Low
SLC30A2	1.75507	-0.153281	0.206409	0.457719	NaN	Low
TRIM63	0	NaN	NaN	NaN	NaN	Low
PDIK1L	26.2413	-0.474198	0.267782	0.0765879	0.404743	OK
FAM110D	0	NaN	NaN	NaN	NaN	Low
ZNF593	116.955	0.0434572	0.165705	0.793123	0.942746	OK
CNKSR1	432.687	0.117983	0.150882	0.434244	0.791598	OK
CATSPER4	0.828039	-0.174897	0.133867	0.191383	NaN	Low
CEP85	277.526	0.036919	0.123674	0.765307	0.933263	OK
SH3BGRL3	12357.5	0.217781	0.0824969	0.00829382	0.117134	OK
UBXN11	53.0053	0.0424159	0.228061	0.852457	0.961229	OK
CD52	0.210173	-0.0447319	0.0702204	0.524111	NaN	Low
AIM1L	830.266	0.330272	0.11587	0.00436697	0.0781533	OK
ZNF683	0	NaN	NaN	NaN	NaN	Low
LIN28A	0	NaN	NaN	NaN	NaN	Low
DHDDS	759.971	0.217226	0.0844895	0.0101394	0.131397	OK
HMGN2	374.256	0.159811	0.124329	0.198654	0.602426	OK
RPS6KA1	1275.88	0.229644	0.101973	0.024322	0.220861	OK
MIR1976	0	NaN	NaN	NaN	NaN	Low
ARID1A	2609.39	0.0582914	0.0677301	0.389435	0.762327	OK
PIGV	155.77	0.0794057	0.162723	0.625563	0.883578	OK
ZDHHC18	336.726	0.131282	0.128795	0.308057	0.708891	OK
SFN	15756.2	0.178016	0.122647	NaN	NaN	Outlier
GPN2	217.625	0.280151	0.147817	0.058059	0.355698	OK
GPATCH3	194.044	0.00282985	0.135842	0.98338	0.995633	OK
NR0B2	0	NaN	NaN	NaN	NaN	Low
NUDC	1975.68	0.242048	0.0816106	0.00301808	0.0607535	OK
C1orf172	169.155	0.192672	0.150773	0.201286	0.605157	OK
TRNP1	929.071	-0.105602	0.111871	0.345189	0.737991	OK
FAM46B	286.911	-0.395163	0.144982	0.00641858	0.100493	OK
SLC9A1	1480.03	0.142172	0.0953531	0.13596	0.513511	OK
WDTC1	841.853	0.0369057	0.103604	0.721677	0.919523	OK
TMEM222	255.051	-0.0516725	0.139649	0.711369	0.915419	OK
LOC644961	14.746	0.225598	0.287132	0.432047	0.790539	OK
SYTL1	336.773	-0.302485	0.20756	NaN	NaN	Outlier
MAP3K6	476.112	0.218444	0.151883	0.150367	0.535482	OK
FCN3	0.210173	-0.0447319	0.0702204	0.524111	NaN	Low
CD164L2	33.751	-0.226979	0.264697	0.391165	0.763138	OK
GPR3	13.1746	0.431265	0.286113	0.131728	0.50649	OK
WASF2	4989.57	-0.0737776	0.0726313	0.309733	0.710186	OK
AHDC1	734.293	-0.120499	0.128844	0.349666	0.741469	OK
FGR	2.27144	0.0190915	0.221782	0.931401	NaN	Low
IFI6	203.714	1.16815	0.287167	NaN	NaN	Outlier
FAM76A	148.34	-0.245387	0.152484	0.107559	0.464801	OK
STX12	530.312	-0.00976768	0.116927	0.933425	0.98297	OK
PPP1R8	576.408	-0.051501	0.110837	0.642178	0.889309	OK
SCARNA1	0	NaN	NaN	NaN	NaN	Low
THEMIS2	114.914	0.0604897	0.15868	0.703051	0.911171	OK
RPA2	488.827	-0.149687	0.121332	0.217315	0.622623	OK
SMPDL3B	45.5618	0.278496	0.225815	0.217466	0.622911	OK
XKR8	112.443	0.0948689	0.174652	0.587	0.868902	OK
EYA3	602.914	0.0435696	0.099827	0.662509	0.89474	OK
PTAFR	1840.22	0.398471	0.0783281	3.63375e-07	3.10748e-05	OK
DNAJC8	2209.67	0.0179766	0.0988472	0.85569	0.961864	OK
ATPIF1	1687.09	-0.182585	0.108613	0.0927532	0.437767	OK
SESN2	424.93	0.0773779	0.138829	0.577281	0.864838	OK
MED18	633.349	0.0297538	0.122117	0.807501	0.944025	OK
PHACTR4	1282.42	0.0165016	0.0778253	0.83208	0.954237	OK
SNHG3	356.245	0.00507994	0.12406	0.967338	0.992141	OK
RCC1	1074.8	0.0268158	0.0849676	0.752306	0.930154	OK
TRNAU1AP	235.655	0.0577868	0.125132	0.64422	0.889362	OK
SNHG12	238.835	0.140906	0.149207	0.344984	0.737991	OK
SNORD99	14.8932	-0.264084	0.280066	0.345714	0.738604	OK
SNORA61	76.8138	0.350843	0.21734	0.106472	0.462111	OK
SNORA44	21.4011	-0.0607456	0.283177	0.830145	0.953748	OK
SNORA16A	10.019	0.323521	0.283429	0.253681	0.657294	OK
RAB42	2.02953	0.111116	0.21068	0.597905	NaN	Low
TAF12	651.933	-0.019477	0.104273	0.851826	0.961229	OK
RNU11	0.430016	0.0164614	0.100104	0.869382	NaN	Low
GMEB1	237.366	-0.0323138	0.185108	0.86142	0.963841	OK
YTHDF2	1256.04	0.100318	0.105597	0.342106	0.736511	OK
OPRD1	0	NaN	NaN	NaN	NaN	Low
EPB41	1096.31	0.0189673	0.0895534	0.832264	0.954237	OK
TMEM200B	10.9382	-0.357781	0.287156	0.212784	0.618341	OK
SRSF4	2418.94	0.0525272	0.0684772	0.443036	0.794684	OK
MECR	208.694	-0.0335349	0.165084	0.839026	0.956243	OK
PTPRU	1131.06	0.122485	0.140315	0.382703	0.758886	OK
MATN1	0.354728	0.0124163	0.0921947	0.892869	NaN	Low
MATN1-AS1	10.1096	0.099761	0.286534	0.727716	0.922428	OK
LAPTM5	7.92856	-0.117187	0.285378	0.681338	NaN	Low
MIR4420	0	NaN	NaN	NaN	NaN	Low
SDC3	1134.69	-0.00899142	0.105938	0.932361	0.982324	OK
PUM1	2264.37	0.0639395	0.0740038	0.387586	0.761622	OK
SNORD103B	0	NaN	NaN	NaN	NaN	Low
SNORD103A	0	NaN	NaN	NaN	NaN	Low
SNORD85	0	NaN	NaN	NaN	NaN	Low
NKAIN1	3.26561	-0.0751018	0.246496	0.760612	NaN	Low
SNRNP40	358.6	0.105812	0.117132	0.366336	0.749911	OK
ZCCHC17	1265.25	0.0225838	0.124539	0.856102	0.961864	OK
FABP3	2.38012	0.11719	0.225838	0.603821	NaN	Low
SERINC2	6277.55	0.172682	0.166719	NaN	NaN	Outlier
LOC149086	0.227892	0.0456636	0.0717276	0.52437	NaN	Low
LOC284551	1.73454	-0.00880114	0.0680911	0.897156	NaN	Low
TINAGL1	10452	0.033978	0.112209	0.762035	0.932569	OK
HCRTR1	0	NaN	NaN	NaN	NaN	Low
PEF1	789.889	0.121902	0.096844	0.208121	0.611647	OK
COL16A1	1679.3	0.1053	0.151848	NaN	NaN	Outlier
BAI2	10.9864	-0.132014	0.287083	0.645627	0.889999	OK
MIR4254	0	NaN	NaN	NaN	NaN	Low
SPOCD1	61.4299	-0.170666	0.237129	0.4717	0.812608	OK
PTP4A2	1767.96	0.0970658	0.123513	0.43194	0.790539	OK
KHDRBS1	2294.02	0.0345897	0.0643945	0.591162	0.871001	OK
TMEM39B	100.117	0.340907	0.199402	0.087331	0.426483	OK
KPNA6	2228.82	0.000894536	0.0741561	0.990375	0.997267	OK
TXLNA	1324.86	0.047284	0.0969575	0.625778	0.883578	OK
CCDC28B	32.1922	0.226058	0.248632	0.363239	0.747456	OK
IQCC	44.2202	0.0665855	0.231265	0.773409	0.93655	OK
DCDC2B	0.719897	0.0140801	0.147751	0.92408	NaN	Low
TMEM234	108.722	0.208599	0.166947	0.211484	0.616167	OK
EIF3I	3489.12	0.222334	0.0911542	0.0147242	0.164783	OK
MTMR9LP	5.54932	0.048896	0.270578	0.856596	NaN	Low
FAM167B	4.191	-0.40119	0.244619	0.100992	NaN	Low
LCK	3.02098	-0.15742	0.240014	0.511904	NaN	Low
HDAC1	2373.42	0.0406233	0.0678776	0.549521	0.852525	OK
MARCKSL1	1191.99	0.296463	0.0862727	0.000589609	0.0184625	OK
FAM229A	1.49151	0.121792	0.164973	0.46036	NaN	Low
TSSK3	0.223574	0.0450816	0.0712796	0.527085	NaN	Low
BSDC1	1593.04	0.0846472	0.0899148	0.346492	0.738993	OK
ZBTB8B	0.447149	0.0778541	0.0926106	0.400538	NaN	Low
ZBTB8A	83.6306	-0.207911	0.200472	0.299686	0.701681	OK
ZBTB8OS	582.54	-0.0392378	0.141379	0.781368	0.938967	OK
RBBP4	1102.1	-0.117178	0.0953478	0.219091	0.623474	OK
SYNC	406.451	-0.110541	0.116703	0.343537	0.73747	OK
KIAA1522	4527.87	-0.0420679	0.0802837	0.600285	0.875282	OK
YARS	2254.24	0.0462895	0.0989805	0.640025	0.889309	OK
S100PBP	308.533	-0.190474	0.116432	0.101856	0.453039	OK
FNDC5	0.131153	-0.0312393	0.0589286	0.596028	NaN	Low
HPCA	2.52109	-0.053838	0.203372	0.79122	NaN	Low
TMEM54	516.468	-0.069758	0.173916	NaN	NaN	Outlier
RNF19B	467.253	0.176855	0.117666	0.132833	0.507902	OK
AK2	3060.16	0.122892	0.116211	0.290285	0.691819	OK
ADC	38.8018	0.102468	0.236465	0.664773	0.895609	OK
TRIM62	158.415	0.138717	0.177386	0.43421	0.791598	OK
ZNF362	154.576	-0.277609	0.171666	0.105846	0.460319	OK
PHC2	924.389	0.155145	0.0857532	0.0704201	0.385183	OK
MIR3605	0.441147	0.042251	0.103028	0.681738	NaN	Low
ZSCAN20	144.229	-0.0450165	0.159767	0.778125	0.938384	OK
CSMD2	0.834354	0.228854	0.153505	0.135998	NaN	Low
HMGB4	0	NaN	NaN	NaN	NaN	Low
LOC402779	0	NaN	NaN	NaN	NaN	Low
C1orf94	0	NaN	NaN	NaN	NaN	Low
GJB5	842.038	0.0965336	0.0880032	0.272671	0.675552	OK
GJB4	332.43	0.381073	0.113377	0.000776296	0.022703	OK
GJB3	1422.99	0.364793	0.0938311	0.000101172	0.00459534	OK
GJA4	0.227892	0.0456636	0.0717276	0.52437	NaN	Low
SMIM12	762.727	0.245389	0.0926738	0.00809985	0.114786	OK
DLGAP3	0.359045	0.0129244	0.092507	0.888887	NaN	Low
LOC653160	25.3028	-0.203998	0.263942	0.439587	0.794248	OK
ZMYM6NB	65.5532	-0.0299796	0.208577	0.885711	0.970813	OK
ZMYM6	567.363	-0.266338	0.115404	0.0210062	0.202705	OK
ZMYM1	124.939	-0.237802	0.18612	0.201361	0.605157	OK
SFPQ	4538.31	-0.0646777	0.0913322	0.478846	0.81615	OK
ZMYM4	1371.75	-0.085285	0.0979075	0.383712	0.759208	OK
KIAA0319L	972.903	-0.0514593	0.0927877	0.579174	0.865306	OK
NCDN	420.163	0.0886177	0.139915	0.526494	0.843683	OK
TFAP2E	5.43242	0.264036	0.265245	0.319522	NaN	Low
PSMB2	2874.78	0.0876753	0.104533	0.401617	0.770335	OK
C1orf216	145.337	-0.179756	0.147814	0.22395	0.625868	OK
CLSPN	237.387	0.0715501	0.135532	0.597555	0.874329	OK
AGO4	422.014	-0.144877	0.111	0.191825	0.595998	OK
AGO1	395.144	-0.00942331	0.106651	0.929594	0.98131	OK
AGO3	179.846	-0.0079361	0.150826	0.958037	0.989777	OK
TEKT2	1.33549	-0.151667	0.161932	0.34896	NaN	Low
ADPRHL2	764.937	0.192978	0.122694	0.115755	0.479414	OK
COL8A2	12.8789	0.0918886	0.284099	0.746363	0.929178	OK
TRAPPC3	1054.92	-0.0112693	0.0948065	0.905382	0.976504	OK
MAP7D1	2637.13	0.250218	0.118704	0.0350376	0.271316	OK
THRAP3	5170.38	0.059573	0.0798887	0.455849	0.804459	OK
SH3D21	450.808	0.238878	0.117822	0.0426167	0.303848	OK
EVA1B	8.7136	-0.155593	0.269945	0.564353	NaN	Low
STK40	253.984	0.2929	0.127907	0.0220246	0.208405	OK
LSM10	187.8	-0.174339	0.174336	0.317303	0.71831	OK
OSCP1	92.019	0.200586	0.173239	0.246921	0.651043	OK
MRPS15	1612.44	0.0149506	0.0964308	0.87679	0.967758	OK
CSF3R	0	NaN	NaN	NaN	NaN	Low
GRIK3	0.451466	0.10463	0.10707	0.328464	NaN	Low
MIR4255	0	NaN	NaN	NaN	NaN	Low
LOC728431	43.4436	0.303595	0.254064	0.232105	0.634482	OK
ZC3H12A	870.927	1.5753	0.136267	6.54011e-31	3.52597e-28	OK
MEAF6	501.258	-0.201616	0.101346	0.0466584	0.318279	OK
MIR5581	1.85258	-0.151014	0.193757	0.435745	NaN	Low
SNIP1	378.822	-0.0908241	0.106778	0.394996	0.764828	OK
DNALI1	50.6061	0.0641445	0.212847	0.763137	0.932569	OK
GNL2	1390.89	0.196963	0.117383	0.0933572	0.438496	OK
RSPO1	0.223574	0.0450816	0.0712796	0.527085	NaN	Low
C1orf109	262.303	-0.0851322	0.13321	0.522769	0.841978	OK
CDCA8	168.128	-0.126617	0.150016	0.398653	0.768059	OK
EPHA10	1.02977	0.136214	0.143266	0.341718	NaN	Low
MANEAL	15.5339	-0.156872	0.278631	0.573429	0.862509	OK
YRDC	203.195	0.275189	0.169336	0.104139	0.457107	OK
C1orf122	207.847	-0.0281327	0.149831	0.851062	0.961118	OK
MTF1	690.969	0.0405736	0.0887273	0.647466	0.890382	OK
INPP5B	102.746	-0.125088	0.178883	0.484381	0.819528	OK
SF3A3	1388.8	-0.0223777	0.11618	0.847263	0.959283	OK
FHL3	187.781	0.24249	0.135427	0.073365	0.393924	OK
UTP11L	752.938	0.134878	0.113799	0.235928	0.639749	OK
POU3F1	4.47458	-0.478124	0.263782	0.0698972	NaN	Low
MIR3659	0	NaN	NaN	NaN	NaN	Low
LOC339442	0	NaN	NaN	NaN	NaN	Low
RRAGC	590.615	-0.239462	0.14065	0.0886535	0.428788	OK
GJA9-MYCBP	0.665956	0.0385221	0.109878	0.725897	NaN	Low
MYCBP	0.131153	-0.0312393	0.0589286	0.596028	NaN	Low
GJA9	0	NaN	NaN	NaN	NaN	Low
RHBDL2	644.664	0.278159	0.107818	0.00988293	0.129681	OK
AKIRIN1	1414.51	0.0671794	0.0822712	0.41418	0.778806	OK
NDUFS5	3216.32	0.104635	0.132352	0.429187	0.788652	OK
MACF1	7860.88	0.131502	0.086627	0.129007	0.501156	OK
KIAA0754	155.814	0.00129871	0.149053	0.993048	0.998362	OK
BMP8A	1.71932	-0.117648	0.189991	0.535766	NaN	Low
PPIEL	11.8491	0.0586652	0.285625	0.837266	0.955614	OK
PABPC4	3781.98	0.00119131	0.0694845	0.986321	0.995959	OK
SNORA55	2.41969	-0.209172	0.229033	0.361094	NaN	Low
HEYL	0.154997	0.0363927	0.0641175	0.57031	NaN	Low
NT5C1A	0	NaN	NaN	NaN	NaN	Low
HPCAL4	3.1799	-0.290759	0.249948	0.244717	NaN	Low
PPIE	435.915	0.0168099	0.131727	0.898456	0.974397	OK
BMP8B	1.86396	-0.275247	0.211145	0.192372	NaN	Low
OXCT2	6.81222	0.0835023	0.260731	0.74877	NaN	Low
TRIT1	375.618	-0.116527	0.114431	0.308527	0.709018	OK
MYCL1	242.487	-0.446104	0.132891	0.000788171	0.0228883	OK
MFSD2A	489.806	0.467008	0.124691	0.00018017	0.00723013	OK
CAP1	16762.1	0.0884854	0.100528	0.378746	0.75645	OK
PPT1	955.46	-0.191146	0.0941161	0.0422596	0.302726	OK
RLF	524.842	-0.282261	0.164614	NaN	NaN	Outlier
TMCO2	0.227892	0.0456636	0.0717276	0.52437	NaN	Low
ZMPSTE24	775.242	-0.237463	0.153331	NaN	NaN	Outlier
COL9A2	21.1281	0.473411	0.273214	0.0831409	0.418758	OK
SMAP2	433.389	0.0880772	0.130408	0.499423	0.82939	OK
ZFP69B	46.1942	-0.0229293	0.236786	0.922857	0.980269	OK
ZFP69	79.2984	-0.362355	0.202009	0.072852	0.392597	OK
EXO5	59.3623	0.081246	0.215884	0.706664	0.91306	OK
ZNF684	26.1882	-0.441531	0.270108	0.102123	0.453549	OK
RIMS3	43.5135	-0.225084	0.221711	0.310004	0.71035	OK
LOC100130557	8.88249	-0.243458	0.278294	0.381671	NaN	Low
NFYC	350.311	0.225251	0.139903	0.107385	0.46461	OK
MIR30E	0.210173	-0.0447319	0.0702204	0.524111	NaN	Low
MIR30C1	0.630518	-0.104319	0.105528	0.322886	NaN	Low
KCNQ4	2.75455	-0.210275	0.226607	0.353445	NaN	Low
CITED4	417.806	0.106766	0.133514	0.423909	0.785319	OK
CTPS1	1289.31	0.334903	0.084505	7.39761e-05	0.00359727	OK
SLFNL1-AS1	14.6039	0.251315	0.285219	0.378247	0.755906	OK
SLFNL1	0.902556	-0.0328513	0.122158	0.787988	NaN	Low
SCMH1	388.503	-0.0423172	0.113586	0.709479	0.914334	OK
EDN2	1.63942	-0.0302283	0.19815	0.878752	NaN	Low
HIVEP3	45.4077	-0.121456	0.234046	0.603801	0.875791	OK
GUCA2B	0	NaN	NaN	NaN	NaN	Low
GUCA2A	0	NaN	NaN	NaN	NaN	Low
FOXJ3	1518.91	-0.00514712	0.0781157	0.947465	0.987333	OK
RIMKLA	0.425412	0.00282532	0.0969767	0.976758	NaN	Low
ZMYND12	2.4891	0.234133	0.225361	0.298842	NaN	Low
PPCS	456.509	-0.358015	0.187163	NaN	NaN	Outlier
CCDC30	7.22869	-0.0181594	0.276176	0.947574	NaN	Low
PPIH	785.808	-0.0839559	0.120748	0.48687	0.821385	OK
YBX1	23692	0.231353	0.0860008	0.00714258	0.106837	OK
CLDN19	0.67	-0.205827	0.143901	0.152618	NaN	Low
LEPRE1	435.866	0.131691	0.100275	0.189081	0.591087	OK
C1orf50	91.5758	0.164359	0.183708	0.37096	0.752205	OK
LOC100129924	1.22654	0.0133489	0.160838	0.933855	NaN	Low
CCDC23	104.332	-0.152434	0.176036	0.38653	0.760669	OK
ERMAP	192.764	-0.134537	0.150931	0.372725	0.752294	OK
ZNF691	110.209	-0.0328562	0.166936	0.843969	0.957948	OK
SLC2A1	8715.25	-0.156775	0.0858554	0.0678448	0.377127	OK
SLC2A1-AS1	26.398	-0.038761	0.266882	0.884524	0.97053	OK
FAM183A	9.3679	0.201173	0.287258	0.483727	NaN	Low
EBNA1BP2	1476.73	0.21283	0.0945668	0.0244122	0.221118	OK
WDR65	3.36737	-0.12622	0.219749	0.565709	NaN	Low
TMEM125	76.8613	-0.0551098	0.217622	0.800086	0.943116	OK
C1orf210	90.791	-0.447394	0.17817	0.0120371	0.145762	OK
TIE1	0	NaN	NaN	NaN	NaN	Low
MPL	2.89045	-0.00840769	0.197712	0.96608	NaN	Low
CDC20	289.044	-0.0480116	0.133974	0.720071	0.918704	OK
ELOVL1	1669.37	0.320769	0.0846512	0.000151067	0.00626498	OK
MED8	329.334	0.117943	0.153517	0.442325	0.794444	OK
SZT2	680.554	0.0981778	0.094345	0.29805	0.700034	OK
HYI	373.422	0.496228	0.113789	1.29504e-05	0.000783341	OK
PTPRF	8429.21	0.131689	0.108195	0.22355	0.625445	OK
KDM4A	1360.31	0.0343243	0.114266	0.76388	0.932569	OK
KDM4A-AS1	17.4094	-0.234511	0.286612	0.413232	0.778409	OK
ST3GAL3	88.3881	0.209811	0.192019	0.274544	0.677361	OK
ARTN	252.94	0.207627	0.164694	0.207424	0.611164	OK
IPO13	883.227	0.0728958	0.114307	0.523655	0.842003	OK
DPH2	279.618	0.0795572	0.146835	0.587947	0.869785	OK
ATP6V0B	594.336	0.17545	0.103872	0.0912009	0.435174	OK
B4GALT2	920.85	0.370025	0.10531	0.000441929	0.0147707	OK
CCDC24	184.231	0.552932	0.162264	0.00065536	0.0199178	OK
SLC6A9	142.349	0.313116	0.182357	0.0859699	0.424205	OK
KLF17	0.533282	0.12524	0.116364	0.281801	NaN	Low
DMAP1	246.044	0.018574	0.121438	0.878437	0.968212	OK
ERI3	346.355	0.16996	0.126212	0.178102	0.575923	OK
RNF220	605.407	0.0420768	0.0960363	0.661289	0.893993	OK
MIR5584	0	NaN	NaN	NaN	NaN	Low
TMEM53	83.4591	-0.11956	0.219066	0.585222	0.867698	OK
C1orf228	7.58212	0.168246	0.281909	0.550633	NaN	Low
KIF2C	135.716	-0.142047	0.171547	0.40765	0.774007	OK
RPS8	8883.86	-0.0421675	0.0789893	0.593454	0.872385	OK
SNORD55	0.30539	0.0833195	0.0962225	0.386542	NaN	Low
SNORD46	1.53193	0.0850368	0.187257	0.649745	NaN	Low
SNORD38A	1.31473	-0.0422412	0.146419	0.772968	NaN	Low
SNORD38B	4.54485	0.371127	0.263252	0.158605	NaN	Low
BEST4	2.59167	0.111004	0.200061	0.578996	NaN	Low
PLK3	426.657	0.395041	0.12408	0.0014537	0.0363687	OK
TCTEX1D4	0.940512	-0.036483	0.123008	0.766779	NaN	Low
BTBD19	44.5247	0.30192	0.240568	0.209467	0.613436	OK
PTCH2	7.77845	0.230748	0.260588	0.375892	NaN	Low
EIF2B3	237.05	0.203456	0.144464	0.159027	0.550358	OK
HECTD3	1083.61	0.197331	0.0773734	0.0107609	0.136035	OK
UROD	972.034	0.0227083	0.0933881	0.807881	0.944025	OK
ZSWIM5	4.54396	0.176586	0.258413	0.494388	NaN	Low
LOC400752	3.00685	-0.145818	0.235736	0.536203	NaN	Low
HPDL	5.2997	-0.400177	0.261622	0.126116	NaN	Low
MUTYH	78.7234	-0.112933	0.224166	0.614407	0.878836	OK
TOE1	99.3568	0.0425681	0.174239	0.806992	0.944025	OK
TESK2	54.6878	-0.314142	0.218247	0.15004	0.53478	OK
CCDC163P	31.7165	-0.31284	0.255878	0.221477	0.62465	OK
MMACHC	127.326	-0.0178204	0.176868	0.919745	0.979875	OK
PRDX1	6724.69	0.0792526	0.0850809	0.351597	0.741536	OK
AKR1A1	548.194	0.223186	0.111959	0.0462119	0.316066	OK
NASP	1012.08	-0.0687278	0.116424	0.554972	0.855182	OK
CCDC17	10.3112	-0.0352264	0.287168	0.90237	0.97579	OK
GPBP1L1	1102.74	0.0847358	0.0847931	0.317637	0.71831	OK
RPS15AP10	3.16143	-0.465392	0.246134	0.0586495	NaN	Low
TMEM69	548.259	0.0175516	0.0973981	0.856992	0.962041	OK
IPP	188.901	-0.386915	0.157066	0.0137631	0.158361	OK
MAST2	627.703	0.190642	0.101397	0.0600863	0.362036	OK
PIK3R3	555.623	-0.373767	0.122773	0.00233155	0.0518524	OK
TSPAN1	5468.19	-0.0539281	0.106248	0.611756	0.878305	OK
POMGNT1	746.597	0.196735	0.101199	0.0518902	0.336035	OK
LURAP1	31.9921	-0.0103027	0.245071	0.966467	0.991804	OK
RAD54L	45.1521	-0.161581	0.223249	0.469207	0.811234	OK
LRRC41	1299.87	0.119932	0.0903918	0.184575	0.584224	OK
UQCRH	2879.7	0.0137954	0.108449	0.898777	0.974397	OK
NSUN4	428.27	0.0286112	0.109852	0.794515	0.942868	OK
FAAH	57.8603	-0.423108	0.215397	0.0494926	0.326267	OK
LOC729041	9.45251	0.120492	0.283466	0.670786	NaN	Low
DMBX1	0	NaN	NaN	NaN	NaN	Low
MKNK1-AS1	0.860032	0.0214477	0.121179	0.859515	NaN	Low
KNCN	0	NaN	NaN	NaN	NaN	Low
MKNK1	486.231	0.194634	0.111127	0.0798676	0.410426	OK
MOB3C	344.539	0.162628	0.119786	0.174572	0.570835	OK
ATPAF1	459.169	-0.219894	0.117572	0.0614421	0.364711	OK
TEX38	0.227892	0.0456636	0.0717276	0.52437	NaN	Low
EFCAB14-AS1	1.7259	-0.0485445	0.148994	0.744564	NaN	Low
EFCAB14	1841.2	-0.101465	0.102665	0.323002	0.722573	OK
CYP4B1	20.8326	-0.455046	0.272111	0.0944687	0.440381	OK
CYP4Z2P	0	NaN	NaN	NaN	NaN	Low
CYP4A11	0	NaN	NaN	NaN	NaN	Low
CYP4X1	38.6281	-0.00912719	0.234467	0.968948	0.99289	OK
CYP4Z1	0.227892	0.0456636	0.0717276	0.52437	NaN	Low
CYP4A22	0	NaN	NaN	NaN	NaN	Low
LINC00853	3.85979	-0.155458	0.257073	0.545363	NaN	Low
PDZK1IP1	133.049	2.06568	0.202376	1.84221e-24	7.36883e-22	OK
TAL1	0	NaN	NaN	NaN	NaN	Low
STIL	126.036	0.185702	0.158639	0.241761	0.645565	OK
CMPK1	1884.99	0.225055	0.104806	0.0317666	0.256783	OK
FOXE3	0.485192	-0.0770539	0.11856	0.515746	NaN	Low
FOXD2-AS1	19.1319	-0.0921718	0.286745	0.747876	0.929178	OK
FOXD2	4.63742	-0.156456	0.271146	0.563929	NaN	Low
TRABD2B	33.3186	-0.0146117	0.258373	0.954902	0.989115	OK
SKINTL	0	NaN	NaN	NaN	NaN	Low
SLC5A9	0.223574	0.0450816	0.0712796	0.527085	NaN	Low
SPATA6	32.0832	-0.502444	0.250629	0.0449918	0.31356	OK
AGBL4	0	NaN	NaN	NaN	NaN	Low
BEND5	0.30539	0.0833195	0.0962225	0.386542	NaN	Low
ELAVL4	0	NaN	NaN	NaN	NaN	Low
DMRTA2	62.4158	-0.0561451	0.241888	0.816451	0.947452	OK
FAF1	551.089	-0.0575181	0.0969554	0.553019	0.85425	OK
CDKN2C	74.9751	-0.516626	0.241098	0.032129	0.258318	OK
C1orf185	0	NaN	NaN	NaN	NaN	Low
RNF11	1065.77	-0.251319	0.101826	0.0135822	0.157992	OK
TTC39A	91.4423	-0.0876007	0.173392	0.613407	0.878836	OK
EPS15	707.346	-0.0279251	0.111748	0.80267	0.943691	OK
OSBPL9	2039.01	-0.13179	0.107128	0.218619	0.623474	OK
NRD1	2941.92	-0.0422112	0.0771607	0.58434	0.867036	OK
MIR761	0	NaN	NaN	NaN	NaN	Low
RAB3B	282.321	-0.042943	0.154225	0.780672	0.938967	OK
TXNDC12	736.632	-0.0265912	0.127251	0.834474	0.955113	OK
KTI12	0	NaN	NaN	NaN	NaN	Low
BTF3L4	266.016	-0.177699	0.172006	0.30156	0.703805	OK
ZFYVE9	649.353	-0.0117932	0.0979169	0.904134	0.97631	OK
CC2D1B	789.941	0.071447	0.0881314	0.417546	0.78152	OK
ORC1	43.9005	-0.164265	0.243533	0.499988	0.829745	OK
PRPF38A	413.78	-0.105321	0.119362	0.377577	0.755446	OK
ZCCHC11	1144.29	-0.2261	0.094876	0.017167	0.179789	OK
GPX7	11.9863	0.238952	0.286437	0.404156	0.771955	OK
FAM159A	1.03648	0.183304	0.169546	0.279631	NaN	Low
SELRC1	199.104	0.30308	0.170893	0.0761453	0.403333	OK
ZYG11B	376.367	-0.133804	0.123691	0.279358	0.682104	OK
ZYG11A	2.93302	0.0149724	0.247433	0.951749	NaN	Low
ECHDC2	257.15	0.00160665	0.161572	0.992066	0.997943	OK
SCP2	2048.35	-0.362635	0.109194	0.000896932	0.0252199	OK
PODN	0	NaN	NaN	NaN	NaN	Low
SLC1A7	0	NaN	NaN	NaN	NaN	Low
CPT2	563.798	-0.201822	0.110465	0.0676964	0.377127	OK
C1orf123	279.348	0.0590063	0.126303	0.640371	0.889309	OK
MAGOH	735.754	0.0189169	0.127126	0.881708	0.968923	OK
LOC100507564	9.62603	-0.376881	0.286648	0.188582	NaN	Low
LRP8	366.167	0.214742	0.12436	0.0842073	0.420309	OK
SLC25A3P1	0	NaN	NaN	NaN	NaN	Low
DMRTB1	0	NaN	NaN	NaN	NaN	Low
GLIS1	0.210173	-0.0447319	0.0702204	0.524111	NaN	Low
TMEM48	421.787	-0.125994	0.104712	0.228885	0.631688	OK
YIPF1	620.328	0.031508	0.122442	0.796924	0.943116	OK
DIO1	0.631268	-0.0467716	0.124733	0.707681	NaN	Low
HSPB11	308.071	-0.290018	0.152742	0.0575984	0.353662	OK
LRRC42	321.611	-0.09583	0.149263	0.52086	0.840752	OK
LDLRAD1	12.8587	-0.223128	0.285834	0.435027	0.791748	OK
TMEM59	1870.29	-0.196566	0.118235	0.0964125	0.443769	OK
TCEANC2	327.637	-0.16829	0.145145	0.246267	0.650045	OK
MIR4781	0	NaN	NaN	NaN	NaN	Low
CDCP2	0	NaN	NaN	NaN	NaN	Low
CYB5RL	13.511	0.0686292	0.28565	0.810132	0.944405	OK
MRPL37	1351.19	0.148093	0.108957	0.174089	0.570089	OK
SSBP3	357.853	-0.0703896	0.134167	0.599832	0.875282	OK
ACOT11	95.8658	0.0595663	0.191212	0.755406	0.931576	OK
FAM151A	2.85431	-0.128855	0.23013	0.57553	NaN	Low
MROH7	0	NaN	NaN	NaN	NaN	Low
HEATR8-TTC4	0	NaN	NaN	NaN	NaN	Low
TTC4	18.1938	-0.297216	0.275302	0.28032	0.68321	OK
PARS2	79.0309	0.229159	0.201163	0.254631	0.657947	OK
TTC22	78.6467	0.287441	0.215535	0.182328	0.582098	OK
C1orf177	1.16455	0.0821429	0.172835	0.634596	NaN	Low
DHCR24	10231	-0.0416439	0.0708889	0.5569	0.855484	OK
TMEM61	13.3717	0.118735	0.284415	0.676334	0.900328	OK
BSND	0	NaN	NaN	NaN	NaN	Low
PCSK9	438.447	0.355273	0.115233	0.00204868	0.0470438	OK
USP24	1063.58	-0.0349764	0.1036	0.735657	0.925995	OK
LOC100507634	10.6044	-0.426472	0.28726	0.137645	0.51674	OK
MIR4422	0	NaN	NaN	NaN	NaN	Low
PPAP2B	109.136	-0.351646	0.183787	0.0557061	0.347462	OK
PRKAA2	121.874	-0.331439	0.183908	0.0715145	0.388768	OK
C1orf168	1.81323	-0.33442	0.198043	0.0912916	NaN	Low
C8A	0	NaN	NaN	NaN	NaN	Low
C8B	6.28351	-0.336802	0.274617	0.220032	NaN	Low
DAB1	0.906226	-0.109808	0.144388	0.446952	NaN	Low
OMA1	313.124	-0.271818	0.213302	NaN	NaN	Outlier
TACSTD2	21680.5	-0.0120731	0.127509	0.924565	0.980551	OK
MYSM1	457.037	-0.358074	0.148712	0.0160475	0.172284	OK
JUN	2811.43	0.097655	0.0716353	0.172812	0.567829	OK
LOC100131060	1.72427	-0.0603708	0.152163	0.691552	NaN	Low
HSD52	0	NaN	NaN	NaN	NaN	Low
FGGY	186.877	-0.129066	0.175241	0.461424	0.806445	OK
MIR4711	0	NaN	NaN	NaN	NaN	Low
HOOK1	256.106	-0.506175	0.195916	NaN	NaN	Outlier
CYP2J2	73.1623	0.0948936	0.188416	0.614515	0.878836	OK
C1orf87	0	NaN	NaN	NaN	NaN	Low
NFIA	528.85	-0.230189	0.106573	0.0307788	0.252419	OK
MGC34796	0	NaN	NaN	NaN	NaN	Low
TM2D1	626.646	-0.0189494	0.172659	NaN	NaN	Outlier
INADL	1523.23	-0.0651914	0.075578	0.388373	0.762118	OK
L1TD1	54.6746	0.235944	0.246682	0.338834	0.735692	OK
KANK4	367.88	-0.130205	0.126935	0.305004	0.706265	OK
USP1	183.295	-0.478676	0.216365	NaN	NaN	Outlier
DOCK7	1073.7	0.0334901	0.096036	0.727297	0.922418	OK
ANGPTL3	0	NaN	NaN	NaN	NaN	Low
ATG4C	95.8818	-0.0725495	0.216696	0.737777	0.926544	OK
LINC00466	0	NaN	NaN	NaN	NaN	Low
FOXD3	0	NaN	NaN	NaN	NaN	Low
ALG6	43.9384	-0.287291	0.269737	0.28684	0.687308	OK
ITGB3BP	63.6529	-0.274503	0.281536	NaN	NaN	Outlier
EFCAB7	161.561	-0.679118	0.157415	1.60183e-05	0.000945844	OK
DLEU2L	7.24983	-0.239109	0.28522	0.401844	NaN	Low
PGM1	1350.94	-0.0585894	0.0757201	0.439071	0.794248	OK
ROR1	22.4876	0.268877	0.286358	0.347754	0.739775	OK
UBE2U	0	NaN	NaN	NaN	NaN	Low
CACHD1	160.927	0.0973595	0.148887	0.513166	0.837271	OK
MIR4794	0	NaN	NaN	NaN	NaN	Low
RAVER2	242.686	-0.13102	0.142761	0.358744	0.744506	OK
JAK1	2163.2	0.143996	0.0880289	0.101885	0.453039	OK
MIR3671	0	NaN	NaN	NaN	NaN	Low
MIR101-1	0	NaN	NaN	NaN	NaN	Low
AK4	1196.45	-0.000254871	0.0997095	0.99796	0.999773	OK
DNAJC6	96.0818	-0.0502825	0.198868	0.800389	0.943116	OK
LEPROT	1130.91	-0.261876	0.148059	NaN	NaN	Outlier
LEPR	193.727	-0.0914311	0.176266	0.603961	0.875921	OK
PDE4B	5.37689	0.531815	0.268873	0.0479354	NaN	Low
SGIP1	2.23094	0.204021	0.203427	0.3159	NaN	Low
MIR3117	0	NaN	NaN	NaN	NaN	Low
TCTEX1D1	0	NaN	NaN	NaN	NaN	Low
INSL5	0	NaN	NaN	NaN	NaN	Low
WDR78	73.2851	-0.266772	0.227111	0.240142	0.643874	OK
MIER1	464.111	-0.323021	0.150991	0.0324082	0.259438	OK
SLC35D1	511.648	-0.380822	0.126064	0.00252065	0.0538898	OK
C1orf141	0	NaN	NaN	NaN	NaN	Low
IL23R	0	NaN	NaN	NaN	NaN	Low
IL12RB2	14.5314	0.0214675	0.286808	0.940334	0.985392	OK
SERBP1	6279.21	0.100582	0.0841215	0.231824	0.634229	OK
GADD45A	6922.88	0.088247	0.0985963	0.370769	0.752205	OK
GNG12	1938.2	-0.0223494	0.152114	NaN	NaN	Outlier
GNG12-AS1	2.04171	0.195488	0.211709	0.35581	NaN	Low
DIRAS3	0.665956	0.0385221	0.109878	0.725897	NaN	Low
WLS	967.837	-0.308844	0.086862	0.000377155	0.0132111	OK
MIR1262	0	NaN	NaN	NaN	NaN	Low
RPE65	0	NaN	NaN	NaN	NaN	Low
DEPDC1	79.8225	-0.399476	0.212208	0.0597712	0.360839	OK
LRRC7	0.761672	-0.168851	0.131748	0.199976	NaN	Low
PIN1P1	0	NaN	NaN	NaN	NaN	Low
LRRC40	218.071	-0.293432	0.222539	NaN	NaN	Outlier
SRSF11	4298.06	-0.0950481	0.121604	0.434439	0.791598	OK
ANKRD13C	280.017	-0.0489928	0.115362	0.671065	0.89787	OK
HHLA3	141.585	-0.0600208	0.182174	0.7418	0.928254	OK
CTH	55.5381	-0.0913728	0.206922	0.658792	0.893151	OK
PTGER3	0.460387	0.123389	0.115552	0.285603	NaN	Low
ZRANB2-AS1	15.3185	0.020084	0.286629	0.944138	0.98653	OK
ZRANB2	1180.14	-0.273746	0.122985	0.0260241	0.229972	OK
MIR186	0	NaN	NaN	NaN	NaN	Low
ZRANB2-AS2	1.94633	-0.00149802	0.190599	0.993729	NaN	Low
NEGR1	6.46037	0.115562	0.28332	0.683358	NaN	Low
NEGR1-IT1	0	NaN	NaN	NaN	NaN	Low
LRRIQ3	4.60799	-0.248844	0.251882	0.323182	NaN	Low
FPGT-TNNI3K	0	NaN	NaN	NaN	NaN	Low
FPGT	87.6811	-0.549296	0.212303	0.00967251	0.12864	OK
TNNI3K	0	NaN	NaN	NaN	NaN	Low
C1orf173	0.64392	-0.0352156	0.109308	0.747325	NaN	Low
CRYZ	634.089	-0.172243	0.120244	0.152017	0.538553	OK
TYW3	549.523	-0.0267497	0.131181	0.83842	0.955937	OK
LHX8	0.131153	-0.0312393	0.0589286	0.596028	NaN	Low
SLC44A5	77.5761	-0.488797	0.207306	0.0183814	0.186369	OK
ACADM	559.908	-0.141218	0.114822	0.218741	0.623474	OK
RABGGTB	1797.72	-0.0440028	0.117799	0.708746	0.913692	OK
SNORD45C	0.582619	0.0628385	0.12228	0.607328	NaN	Low
SNORD45A	2.67723	0.127577	0.158691	0.421437	NaN	Low
SNORD45B	0.223574	0.0450816	0.0712796	0.527085	NaN	Low
MSH4	2.33209	-0.069629	0.199304	0.726819	NaN	Low
ASB17	0.210173	-0.0447319	0.0702204	0.524111	NaN	Low
ST6GALNAC3	0.569218	-0.0368369	0.122112	0.762907	NaN	Low
ST6GALNAC5	43.2502	-0.234407	0.235542	0.319648	0.71831	OK
PIGK	329.778	-0.13397	0.108122	0.215325	0.620899	OK
AK5	0.432226	0.0394478	0.114726	0.730965	NaN	Low
ZZZ3	619.409	-0.124123	0.112014	0.267815	0.671638	OK
USP33	411.783	-0.19667	0.161144	0.222292	0.624754	OK
FAM73A	386.112	0.0131503	0.134204	0.921943	0.980269	OK
NEXN	410.27	-0.192857	0.12651	0.1274	0.498346	OK
FUBP1	3725.87	-0.0299708	0.102416	0.7698	0.934696	OK
DNAJB4	330.779	-0.503878	0.186897	NaN	NaN	Outlier
GIPC2	6.04859	-0.502502	0.274309	0.0669688	NaN	Low
MGC27382	0	NaN	NaN	NaN	NaN	Low
PTGFR	1.05161	-0.117882	0.144088	0.413288	NaN	Low
IFI44L	134.236	1.00858	0.286312	NaN	NaN	Outlier
IFI44	280.864	0.845419	0.12119	3.03714e-12	6.17385e-10	OK
ELTD1	3.1622	0.042783	0.21495	0.842234	NaN	Low
LPHN2	991.284	-0.0787687	0.100515	0.433243	0.791195	OK
MIR548AP	0	NaN	NaN	NaN	NaN	Low
TTLL7	112.014	0.0349444	0.165167	0.832442	0.954353	OK
PRKACB	150.294	-0.57246	0.153368	0.000189514	0.00755619	OK
SAMD13	5.55224	-0.266729	0.262546	0.309661	NaN	Low
UOX	0.232495	0.0520903	0.076326	0.494941	NaN	Low
DNASE2B	0	NaN	NaN	NaN	NaN	Low
RPF1	507.43	0.0942838	0.127129	0.458307	0.805376	OK
GNG5	594.235	-0.127453	0.1525	0.403293	0.771535	OK
CTBS	96.7615	-0.203741	0.228868	0.373351	0.752294	OK
C1orf180	1.15361	-0.221442	0.161683	0.170809	NaN	Low
SSX2IP	185.477	-0.433608	0.195694	0.0267092	0.233435	OK
LPAR3	259.69	-0.220555	0.15752	0.161461	0.554214	OK
MCOLN2	29.8637	-0.295067	0.248325	0.234745	0.638061	OK
MCOLN3	211.524	-0.555233	0.141624	8.83725e-05	0.00411962	OK
WDR63	107.111	-0.430889	0.177039	0.0149385	0.166178	OK
MIR4423	0.359045	0.0129244	0.092507	0.888887	NaN	Low
SYDE2	46.9396	-0.544656	0.220485	0.0135012	0.157345	OK
C1orf52	197.932	0.0051784	0.152664	0.972941	0.993533	OK
BCL10	324.071	-0.0594077	0.136251	0.662825	0.89475	OK
LOC646626	16.2263	-0.574932	0.286578	0.0448353	0.312963	OK
DDAH1	105.269	0.0766244	0.176225	0.6637	0.895087	OK
CYR61	2440.61	0.257269	0.0886332	0.00370044	0.0701612	OK
ZNHIT6	764.599	0.0456594	0.0913957	0.617371	0.879706	OK
COL24A1	3.2266	0.325287	0.248401	0.190357	NaN	Low
ODF2L	476.799	-0.0589369	0.160853	NaN	NaN	Outlier
CLCA2	3968.58	-0.53276	0.0744335	8.21458e-13	1.78703e-10	OK
CLCA1	0.287671	-0.0236434	0.0868282	0.78539	NaN	Low
CLCA4	242.124	-0.325342	0.129686	0.0121176	0.146308	OK
CLCA3P	7.85644	-0.00957274	0.280268	0.972753	NaN	Low
SH3GLB1	2076.12	-0.0427805	0.0870281	0.623022	0.882236	OK
SEP15	1114.91	-0.0761869	0.0952716	0.423896	0.785319	OK
HS2ST1	222.867	-0.314484	0.148756	0.0345081	0.268649	OK
LOC339524	8.11985	-0.222819	0.28558	0.435253	NaN	Low
LMO4	260.308	-0.362513	0.138188	0.00870738	0.120638	OK
LOC100505768	0	NaN	NaN	NaN	NaN	Low
PKN2	854.328	-0.192775	0.125073	0.123245	0.49151	OK
GTF2B	561.186	-0.0123436	0.10806	0.909056	0.977818	OK
CCBL2	127.27	-0.116267	0.273041	NaN	NaN	Outlier
RBMXL1	278.718	-0.139759	0.137184	0.308311	0.708891	OK
GBP3	1171.27	0.0934787	0.0880476	0.288379	0.689368	OK
GBP1	321.988	0.339598	0.132102	0.0101484	0.131397	OK
GBP2	64.9926	-0.0945627	0.225612	0.675114	0.899765	OK
GBP7	0.131153	-0.0312393	0.0589286	0.596028	NaN	Low
GBP4	21.1836	-0.394195	0.276075	0.153334	0.539135	OK
GBP5	28.6362	1.09052	0.280235	9.9644e-05	0.00455936	OK
GBP6	1725.18	-0.361493	0.0933376	0.000107522	0.00486594	OK
GBP1P1	15.947	-0.268241	0.286698	0.349468	0.741469	OK
LRRC8B	77.8019	0.193021	0.198344	0.330471	0.728534	OK
FLJ27354	1.38673	0.102148	0.18674	0.584373	NaN	Low
LRRC8C	313.441	0.0424186	0.136479	0.755947	0.931711	OK
LRRC8D	503.163	0.0222618	0.104601	0.831462	0.954237	OK
GEMIN8P4	6.53185	-0.103388	0.274996	0.706945	NaN	Low
ZNF326	904.628	-0.110705	0.10517	0.292514	0.694197	OK
BARHL2	0	NaN	NaN	NaN	NaN	Low
ZNF644	567.016	-0.268476	0.150248	NaN	NaN	Outlier
HFM1	0.551499	-0.136151	0.119335	0.253909	NaN	Low
CDC7	109.843	-0.249145	0.187183	0.18318	0.583083	OK
TGFBR3	31.1912	-0.196182	0.251382	0.435148	0.791748	OK
BRDT	0	NaN	NaN	NaN	NaN	Low
EPHX4	15.6244	-0.174859	0.283547	0.537442	0.847872	OK
BTBD8	11.2724	0.00845793	0.287219	0.976508	0.994415	OK
KIAA1107	94.2784	-0.248668	0.194989	0.202206	0.606464	OK
C1orf146	0	NaN	NaN	NaN	NaN	Low
GLMN	36.4715	-0.179672	0.268395	0.50322	0.831104	OK
RPAP2	179.456	-0.144357	0.190566	0.44874	0.79896	OK
GFI1	3.27239	0.117174	0.192493	0.542712	NaN	Low
EVI5	473.047	-0.109594	0.122691	0.371723	0.752294	OK
RPL5	12702.2	-0.0266464	0.0850887	0.754159	0.930597	OK
FAM69A	416.274	-0.120056	0.14503	0.407786	0.774028	OK
SNORD21	1.4061	-0.0227946	0.190523	0.904767	NaN	Low
SNORA66	1.85562	-0.268021	0.209288	0.200324	NaN	Low
MTF2	261.361	-0.0544535	0.138495	0.694186	0.907282	OK
TMED5	702.954	-0.242188	0.121369	0.0459908	0.315778	OK
CCDC18	70.5734	-0.22001	0.226242	0.330826	0.728534	OK
LOC100131564	364.326	-0.244727	0.141497	0.0837089	0.41987	OK
DR1	687.408	-0.215195	0.105948	0.0422413	0.302726	OK
FNBP1L	1600.36	-0.179111	0.114072	0.116378	0.480711	OK
BCAR3	1186.22	0.218121	0.081714	0.00760055	0.11023	OK
LOC100129046	3.00974	0.199037	0.219452	0.36442	NaN	Low
MIR760	0	NaN	NaN	NaN	NaN	Low
DNTTIP2	1191.5	0.045589	0.113119	0.686935	0.903111	OK
GCLM	613.955	-0.0589541	0.0919387	0.521372	0.840813	OK
ABCA4	10.047	0.0484686	0.286506	0.865662	0.964914	OK
ARHGAP29	636.967	-0.407383	0.158506	NaN	NaN	Outlier
ABCD3	493.265	-0.275555	0.167823	NaN	NaN	Outlier
F3	12707.5	0.408799	0.0735876	2.77185e-08	3.27343e-06	OK
SLC44A3	202.44	-0.286082	0.138141	0.0383634	0.287262	OK
CNN3	2289.84	-0.0651897	0.106337	0.539843	0.848539	OK
LOC729970	6.9545	-0.263833	0.271969	0.332004	NaN	Low
ALG14	94.9448	0.0851382	0.17447	0.625563	0.883578	OK
TMEM56	2.88434	-0.120916	0.235241	0.607245	NaN	Low
TMEM56-RWDD3	0.223574	0.0450816	0.0712796	0.527085	NaN	Low
RWDD3	29.8972	0.0848956	0.278147	0.7602	0.932569	OK
FLJ31662	0	NaN	NaN	NaN	NaN	Low
PTBP2	146.512	-0.453401	0.204785	0.0268262	0.233435	OK
DPYD	53.9321	-0.0788716	0.233006	0.734989	0.925668	OK
DPYD-AS1	0.197521	-0.0428081	0.0687346	0.533415	NaN	Low
MIR137HG	0.39346	-0.0785576	0.0922542	0.394473	NaN	Low
MIR2682	0	NaN	NaN	NaN	NaN	Low
MIR137	0	NaN	NaN	NaN	NaN	Low
LOC729987	0	NaN	NaN	NaN	NaN	Low
SNX7	543.071	-0.227118	0.122021	0.0627019	0.36744	OK
LPPR5	0.341326	-0.0948998	0.10069	0.34594	NaN	Low
LOC100129620	0	NaN	NaN	NaN	NaN	Low
LPPR4	0	NaN	NaN	NaN	NaN	Low
PALMD	284.83	-0.479036	0.139713	0.000606426	0.0188463	OK
MIR548AA1	0	NaN	NaN	NaN	NaN	Low
MIR548D1	1.80922	0.115064	0.191837	0.548639	NaN	Low
FRRS1	129.912	-0.468792	0.193033	0.0151588	0.16765	OK
AGL	532.047	-0.249193	0.104879	0.0175014	0.180998	OK
SLC35A3	312.777	-0.30821	0.210116	NaN	NaN	Outlier
HIAT1	741.433	-0.280151	0.0986601	0.00451766	0.0795724	OK
SASS6	89.6178	-0.465332	0.218585	0.0332677	0.262584	OK
TRMT13	202.945	-0.162816	0.145788	0.264081	0.667469	OK
LRRC39	11.9851	0.111187	0.28606	0.697509	0.908902	OK
DBT	564.227	-0.202076	0.116158	0.0819176	0.416302	OK
RTCA	1077.51	0.0655988	0.130932	0.616361	0.879512	OK
MIR553	0.301073	0.0826836	0.0958686	0.38843	NaN	Low
CDC14A	27.1158	-0.348699	0.270716	0.197724	0.602108	OK
GPR88	0	NaN	NaN	NaN	NaN	Low
LOC100128787	0	NaN	NaN	NaN	NaN	Low
VCAM1	0	NaN	NaN	NaN	NaN	Low
EXTL2	81.8498	-0.669266	0.191404	0.000471194	0.0154572	OK
SLC30A7	300.083	-0.167019	0.144536	0.247862	0.652407	OK
DPH5	465.754	-0.01286	0.116545	0.912137	0.978821	OK
S1PR1	28.2929	-0.254849	0.251736	0.311364	0.712002	OK
RNU6-6	0	NaN	NaN	NaN	NaN	Low
OLFM3	0	NaN	NaN	NaN	NaN	Low
DNAJA1P5	0	NaN	NaN	NaN	NaN	Low
COL11A1	1.62295	0.146374	0.196793	0.456999	NaN	Low
RNPC3	254.87	-0.471165	0.160154	0.00326146	0.0639908	OK
AMY2B	55.8931	-0.0615762	0.210787	0.770191	0.934752	OK
ACTG1P4	0.696114	-0.0193949	0.128857	0.880358	NaN	Low
AMY2A	0.208652	-0.0114275	0.0784139	0.884132	NaN	Low
AMY1A	0	NaN	NaN	NaN	NaN	Low
AMY1C	0	NaN	NaN	NaN	NaN	Low
AMY1B	0	NaN	NaN	NaN	NaN	Low
LOC100129138	0	NaN	NaN	NaN	NaN	Low
PRMT6	129.826	-0.142842	0.177886	0.421976	0.784357	OK
NTNG1	40.219	0.139009	0.254775	0.585331	0.867698	OK
VAV3	412.376	-0.608805	0.124738	1.05718e-06	8.09201e-05	OK
VAV3-AS1	0	NaN	NaN	NaN	NaN	Low
SLC25A24	968.457	-0.192201	0.117	0.100437	0.451354	OK
NBPF4	0.197521	-0.0428081	0.0687346	0.533415	NaN	Low
NBPF6	0	NaN	NaN	NaN	NaN	Low
FAM102B	59.1189	-0.331621	0.226283	0.142782	0.526255	OK
HENMT1	18.8126	-0.0331734	0.278172	0.905073	0.976329	OK
PRPF38B	2562.6	-0.0187162	0.131907	0.887168	0.971364	OK
FNDC7	0.752505	-0.0571254	0.116313	0.623332	NaN	Low
STXBP3	494.77	-0.188737	0.130864	0.149237	0.534061	OK
AKNAD1	3.91003	0.0330202	0.24537	0.89295	NaN	Low
SRG7	0.223574	0.0450816	0.0712796	0.527085	NaN	Low
GPSM2	411.746	-0.46624	0.139395	0.000823607	0.0237139	OK
CLCC1	552.218	-0.0299163	0.0951918	0.753313	0.930201	OK
WDR47	726.853	0.0477599	0.102632	0.641681	0.889309	OK
TAF13	702.08	-0.0850052	0.12883	0.509368	0.835471	OK
TMEM167B	353.582	-0.054197	0.107307	0.613515	0.878836	OK
SCARNA2	0.223574	0.0450816	0.0712796	0.527085	NaN	Low
C1orf194	0	NaN	NaN	NaN	NaN	Low
KIAA1324	14.275	-0.276936	0.283883	0.329298	0.728192	OK
SARS	4045.1	0.192027	0.0774757	0.013192	0.155193	OK
CELSR2	1516.76	-0.166802	0.1298	0.198771	0.602426	OK
PSRC1	135.158	-0.358453	0.167695	0.0325552	0.259438	OK
MYBPHL	17.618	0.162361	0.282458	0.565416	0.85916	OK
SORT1	1106.25	-0.221616	0.0839659	0.00830639	0.117161	OK
PSMA5	1130.22	0.211332	0.107085	0.0484382	0.322003	OK
SYPL2	0.868243	0.0676434	0.117959	0.56634	NaN	Low
ATXN7L2	36.9017	0.302165	0.247882	0.222849	0.625045	OK
CYB561D1	302.931	-0.31742	0.123814	0.0103566	0.133079	OK
AMIGO1	7.54876	-0.236519	0.284964	0.406541	NaN	Low
GPR61	0	NaN	NaN	NaN	NaN	Low
GNAI3	1221.71	-0.00519158	0.107928	0.961635	0.990717	OK
MIR197	0.470958	-0.0658701	0.105409	0.532035	NaN	Low
GNAT2	0.496323	-0.0370743	0.121134	0.759558	NaN	Low
AMPD2	402.082	0.144533	0.13041	0.267735	0.671638	OK
GSTM4	51.7241	0.0410007	0.228198	0.85741	0.962278	OK
GSTM2	23.004	-0.407869	0.277702	0.141906	0.524638	OK
GSTM1	49.1045	-0.181715	0.216915	0.402185	0.770626	OK
GSTM5	0	NaN	NaN	NaN	NaN	Low
GSTM3	145.545	0.0809656	0.158345	0.609125	0.876951	OK
EPS8L3	0.65359	0.0721669	0.132849	0.586976	NaN	Low
CSF1	239.953	0.413865	0.162602	0.0109194	0.13724	OK
AHCYL1	2431.58	-0.0558527	0.0849224	0.510737	0.836058	OK
STRIP1	494.955	0.0838878	0.0967136	0.385732	0.76053	OK
ALX3	1.42754	0.0421669	0.152077	0.78157	NaN	Low
UBL4B	0	NaN	NaN	NaN	NaN	Low
SLC6A17	3.07259	-0.17126	0.247842	0.489562	NaN	Low
KCNC4	84.3201	0.20112	0.216855	0.353698	0.742818	OK
LOC440600	2.49349	0.0864796	0.220766	0.695261	NaN	Low
RBM15	188.075	-0.0230102	0.140108	0.869548	0.966159	OK
SLC16A4	390.238	-0.229948	0.12822	0.072911	0.392694	OK
LAMTOR5	630.725	-0.0366741	0.12531	0.769777	0.934696	OK
PROK1	0	NaN	NaN	NaN	NaN	Low
CYMP	0.911293	-0.022653	0.152358	0.881804	NaN	Low
KCNA10	0.0774984	0.0195616	0.0472692	0.678995	NaN	Low
KCNA2	0.223574	0.0450816	0.0712796	0.527085	NaN	Low
KCNA3	0	NaN	NaN	NaN	NaN	Low
CD53	0	NaN	NaN	NaN	NaN	Low
LRIF1	230.386	-0.248082	0.164477	0.131477	0.505837	OK
DRAM2	718.297	-0.172375	0.125973	0.171204	0.565377	OK
CEPT1	758.256	-0.214895	0.118762	0.0703795	0.385183	OK
DENND2D	332.022	0.0385638	0.112187	0.731038	0.924233	OK
CHI3L2	3.98544	0.275035	0.219416	0.210028	NaN	Low
CHIAP2	0	NaN	NaN	NaN	NaN	Low
CHIA	0	NaN	NaN	NaN	NaN	Low
PIFO	9.8123	-0.35188	0.286803	0.219858	NaN	Low
PGCP1	0	NaN	NaN	NaN	NaN	Low
OVGP1	58.7502	0.127832	0.241999	0.597337	0.874289	OK
WDR77	890.243	0.0108988	0.102411	0.915247	0.979411	OK
ATP5F1	2479.35	-0.000754736	0.0813992	0.992602	0.998205	OK
C1orf162	8.4913	-0.141176	0.285612	0.6211	NaN	Low
ADORA3	0	NaN	NaN	NaN	NaN	Low
LOC100129269	1.58515	-0.251696	0.193576	0.193516	NaN	Low
RAP1A	625.494	-0.168406	0.112202	0.133377	0.508591	OK
FAM212B	262.491	-0.345701	0.145266	0.017323	0.180337	OK
LOC100506343	11.0722	-0.488391	0.286257	0.0879841	0.427007	OK
DDX20	311.58	0.145338	0.122653	0.236036	0.639749	OK
KCND3	2.70315	0.0360925	0.180967	0.841917	NaN	Low
LOC643355	0.0774984	0.0195616	0.0472692	0.678995	NaN	Low
CTTNBP2NL	1345.17	0.0656933	0.0765355	0.390706	0.763101	OK
MIR4256	0.227892	0.0456636	0.0717276	0.52437	NaN	Low
WNT2B	8.69968	0.0356064	0.28611	0.900959	NaN	Low
ST7L	123.11	-0.253869	0.175573	0.148193	0.533781	OK
CAPZA1	2426.97	-0.165805	0.105109	0.114692	0.477084	OK
MOV10	986.056	0.0360052	0.111713	0.747225	0.929178	OK
RHOC	5440.7	0.25457	0.0790584	0.00128178	0.0329171	OK
PPM1J	79.84	0.234684	0.186393	0.208001	0.611647	OK
FAM19A3	1.28299	-0.00552547	0.164315	0.973174	NaN	Low
SLC16A1	3212.5	0.0358997	0.0897304	0.689094	0.904292	OK
AKR7A2P1	0.420346	-0.0779622	0.0918999	0.39625	NaN	Low
LRIG2	118.955	0.0785078	0.179581	0.661987	0.894381	OK
LOC643441	0	NaN	NaN	NaN	NaN	Low
MAGI3	208.82	-0.088255	0.132206	0.504417	0.831641	OK
PHTF1	215.635	-0.0370785	0.144317	0.797238	0.943116	OK
RSBN1	178.405	-0.171279	0.177164	0.333652	0.731564	OK
PTPN22	4.39584	0.145109	0.259462	0.575979	NaN	Low
AP4B1-AS1	1.92803	-0.0873076	0.180559	0.628711	NaN	Low
BCL2L15	13.8391	0.0848838	0.285664	0.766356	0.933387	OK
AP4B1	158.436	0.171437	0.168056	0.307673	0.708475	OK
DCLRE1B	179.18	0.0528861	0.147975	0.720794	0.919153	OK
HIPK1	716.863	0.0154557	0.101765	0.879284	0.968212	OK
OLFML3	12.1944	0.49664	0.284733	0.0811182	0.413936	OK
SYT6	0	NaN	NaN	NaN	NaN	Low
TRIM33	976.078	-0.0331195	0.104455	0.751191	0.929897	OK
BCAS2	447.876	-0.282513	0.145795	0.0526542	0.337074	OK
DENND2C	231.289	0.0160341	0.123234	0.896478	0.974177	OK
AMPD1	0.407693	-0.104964	0.105618	0.320318	NaN	Low
NRAS	660.688	-0.201719	0.145127	NaN	NaN	Outlier
CSDE1	11202.5	-0.00969011	0.0749547	0.897137	0.974196	OK
SIKE1	297.403	-0.165063	0.144152	0.252182	0.655431	OK
SYCP1	0	NaN	NaN	NaN	NaN	Low
TSHB	0	NaN	NaN	NaN	NaN	Low
TSPAN2	11.3716	-0.0171768	0.28564	0.952048	0.988435	OK
NGF	3.38578	-0.0316614	0.228685	0.889885	NaN	Low
VANGL1	1077.95	-0.122595	0.0855715	0.151953	0.538553	OK
CASQ2	3.17233	0.108346	0.24613	0.659794	NaN	Low
NHLH2	36.0324	-0.649414	0.251252	0.00974607	0.129253	OK
SLC22A15	371.391	-0.108285	0.126564	0.392233	0.763289	OK
MAB21L3	34.303	-0.458367	0.244879	0.0612329	0.364256	OK
ATP1A1	10508.9	-0.0952989	0.0696034	0.170946	0.565367	OK
ATP1A1OS	97.1927	0.0386155	0.281298	NaN	NaN	Outlier
CD58	142.53	-0.252527	0.24094	NaN	NaN	Outlier
IGSF3	2894.56	0.0424789	0.0708779	0.548956	0.852053	OK
MIR320B1	0	NaN	NaN	NaN	NaN	Low
CD2	0	NaN	NaN	NaN	NaN	Low
PTGFRN	8082.48	0.0339931	0.0559644	0.543581	0.850657	OK
CD101	42.2072	0.106688	0.249629	0.669098	0.896984	OK
TTF2	336.855	0.227739	0.123701	0.0656155	0.372201	OK
MIR942	0.154997	0.0363927	0.0641175	0.57031	NaN	Low
TRIM45	53.9567	-0.067097	0.218558	0.758844	0.932569	OK
VTCN1	182.199	-0.960343	0.17528	4.27985e-08	4.7384e-06	OK
MAN1A2	986.827	-0.286014	0.0993589	0.00399455	0.0738187	OK
FAM46C	10.4473	-0.392208	0.28719	0.172042	0.565866	OK
GDAP2	263.223	0.0374782	0.129534	0.772328	0.93588	OK
WDR3	910.946	0.0895518	0.112433	0.425748	0.785723	OK
SPAG17	23.1269	-0.158931	0.279515	0.569632	0.860646	OK
TBX15	0	NaN	NaN	NaN	NaN	Low
WARS2	75.6437	0.100492	0.197839	0.611488	0.878305	OK
HAO2	0	NaN	NaN	NaN	NaN	Low
HSD3B2	0	NaN	NaN	NaN	NaN	Low
HSD3B1	0	NaN	NaN	NaN	NaN	Low
HSD3BP4	0.210173	-0.0447319	0.0702204	0.524111	NaN	Low
LINC00622	0.963298	0.134157	0.151583	0.376134	NaN	Low
ZNF697	221.293	0.00825385	0.1658	0.960296	0.99027	OK
PHGDH	101.9	-0.449239	0.202604	0.0266007	0.233109	OK
HMGCS2	0	NaN	NaN	NaN	NaN	Low
REG4	0.615384	0.156081	0.128574	0.224773	NaN	Low
NBPF7	0	NaN	NaN	NaN	NaN	Low
ADAM30	0	NaN	NaN	NaN	NaN	Low
NOTCH2	3299.68	-0.00893935	0.0628171	0.886837	0.971364	OK
FAM72B	18.0953	-0.299156	0.27875	0.283178	0.684297	OK
HIST2H2BA	3.44346	0.340066	0.245942	0.166755	NaN	Low
FCGR1B	0	NaN	NaN	NaN	NaN	Low
SRGAP2D	52.79	-0.388775	0.210525	0.0647913	0.371001	OK
EMBP1	9.66561	0.0994262	0.287062	0.729074	NaN	Low
ANKRD20A12P	0.131153	-0.0312393	0.0589286	0.596028	NaN	Low
LOC100130000	0.433747	0.000695227	0.097478	0.994309	NaN	Low
FLJ39739	0	NaN	NaN	NaN	NaN	Low
LOC100286793	1.05516	-0.0109009	0.170552	0.949037	NaN	Low
PPIAL4G	0	NaN	NaN	NaN	NaN	Low
FAM72D	9.40925	-0.137962	0.28462	0.627871	NaN	Low
LINC00623	0	NaN	NaN	NaN	NaN	Low
LOC728875	18.0429	0.348509	0.283747	0.219357	0.623474	OK
PPIAL4C	0	NaN	NaN	NaN	NaN	Low
PPIAL4B	0	NaN	NaN	NaN	NaN	Low
PPIAL4A	0	NaN	NaN	NaN	NaN	Low
PFN1P2	2.34586	-0.0138657	0.211994	0.947851	NaN	Low
NBPF9	146.331	0.20385	0.172853	0.23827	0.641518	OK
LOC653513	0.210173	-0.0447319	0.0702204	0.524111	NaN	Low
PDE4DIP	855.122	-0.182235	0.0986202	0.0646242	0.370567	OK
SEC22B	1124.07	0.081408	0.0845624	0.3357	0.733202	OK
NOTCH2NL	215.404	-0.0749524	0.144953	0.6051	0.876289	OK
NBPF10	677.701	-0.0395348	0.103864	0.70347	0.911171	OK
HFE2	0	NaN	NaN	NaN	NaN	Low
TXNIP	6166.41	-0.0780886	0.0658922	0.23598	0.639749	OK
POLR3GL	469.777	0.0640879	0.129268	0.620052	0.880489	OK
ANKRD34A	31.7836	-0.127589	0.257296	0.619978	0.880489	OK
LIX1L	62.5939	0.306861	0.224362	0.171405	0.565377	OK
RBM8A	2483.92	0.13034	0.0885924	0.141229	0.52315	OK
GNRHR2	18.6366	-0.58314	0.285348	0.0409921	0.298474	OK
PEX11B	238.003	0.0885244	0.133274	0.506544	0.832712	OK
ITGA10	47.4409	0.0707682	0.235281	0.763581	0.932569	OK
ANKRD35	26.6531	-0.18724	0.261997	0.474817	0.813784	OK
PIAS3	803.224	0.05624	0.0907778	0.535564	0.847434	OK
NUDT17	30.21	-0.049547	0.258347	0.847911	0.959578	OK
POLR3C	435.083	-0.0515172	0.0998816	0.606006	0.876365	OK
RNF115	281.222	-0.0834683	0.122451	0.495462	0.826548	OK
CD160	0.726485	0.0871862	0.144778	0.547038	NaN	Low
PDZK1	19.7392	0.360922	0.276618	0.191973	0.596047	OK
GPR89A	30.5293	0.13022	0.267236	0.626058	0.883578	OK
GPR89C	0	NaN	NaN	NaN	NaN	Low
PDZK1P1	0	NaN	NaN	NaN	NaN	Low
NBPF11	0	NaN	NaN	NaN	NaN	Low
NBPF24	0.906287	-0.0720578	0.152913	0.637474	NaN	Low
HYDIN2	0	NaN	NaN	NaN	NaN	Low
LOC728989	0.813806	-0.194281	0.140333	0.166227	NaN	Low
PRKAB2	931.377	-0.283913	0.123721	0.0217456	0.207411	OK
PDIA3P	60.5465	-0.20733	0.233144	0.373854	0.752294	OK
FMO5	12.2532	-0.774002	0.285581	0.00672288	0.103173	OK
CHD1L	839.146	0.00882874	0.0880637	0.920143	0.979968	OK
LINC00624	0.0774984	0.0195616	0.0472692	0.678995	NaN	Low
BCL9	519.113	-0.018792	0.107172	0.860809	0.963732	OK
ACP6	281.115	0.0123214	0.124042	0.920875	0.980269	OK
GJA5	55.4615	0.334256	0.242455	0.168009	0.561731	OK
GJA8	0	NaN	NaN	NaN	NaN	Low
GPR89B	6.92701	-0.258595	0.279465	0.354798	NaN	Low
MIR5087	0	NaN	NaN	NaN	NaN	Low
NBPF14	92.1934	0.531103	0.207083	0.0103268	0.132973	OK
PPIAL4F	0	NaN	NaN	NaN	NaN	Low
PPIAL4D	0	NaN	NaN	NaN	NaN	Low
NBPF15	63.0727	0.308822	0.199414	0.121467	0.487847	OK
NBPF16	25.3312	0.0181329	0.265049	0.945456	0.986553	OK
PPIAL4E	0	NaN	NaN	NaN	NaN	Low
LOC645166	60.9614	0.0437598	0.205898	0.831693	0.954237	OK
LOC388692	162.214	0.0163479	0.141219	0.90784	0.977308	OK
FCGR1C	0	NaN	NaN	NaN	NaN	Low
FAM91A2	6.58824	0.165692	0.28095	0.555354	NaN	Low
HIST2H2BF	4.44573	-0.156273	0.271045	0.564238	NaN	Low
FCGR1A	0	NaN	NaN	NaN	NaN	Low
HIST2H3D	0.945708	-0.117699	0.144834	0.416421	NaN	Low
HIST2H4A	0	NaN	NaN	NaN	NaN	Low
HIST2H4B	0	NaN	NaN	NaN	NaN	Low
HIST2H3C	0	NaN	NaN	NaN	NaN	Low
HIST2H3A	0	NaN	NaN	NaN	NaN	Low
HIST2H2AA4	0	NaN	NaN	NaN	NaN	Low
HIST2H2AA3	0	NaN	NaN	NaN	NaN	Low
HIST2H2BC	1.59578	0.0839204	0.167171	0.615664	NaN	Low
HIST2H2BE	241.044	-0.0605438	0.135627	0.655309	0.891088	OK
HIST2H2AC	1.46058	-0.18557	0.198118	0.348931	NaN	Low
HIST2H2AB	0.275019	-0.0219167	0.085658	0.798057	NaN	Low
BOLA1	28.2214	0.139346	0.264484	0.598291	0.874762	OK
SV2A	4.2647	0.0242353	0.265126	0.927167	NaN	Low
SF3B4	1355.57	0.159455	0.102639	0.120291	0.486284	OK
MTMR11	216.684	0.0890687	0.14591	0.541573	0.849957	OK
OTUD7B	796.295	-0.06315	0.0991656	0.524246	0.842257	OK
VPS45	466.633	-0.0520664	0.107796	0.629091	0.88508	OK
PLEKHO1	62.7685	0.231727	0.198795	0.243752	0.648254	OK
ANP32E	847.909	-0.215404	0.112169	0.0548134	0.345369	OK
CA14	1.24609	-0.133759	0.187979	0.476734	NaN	Low
APH1A	1225.24	0.0995411	0.0956234	0.297889	0.700034	OK
C1orf54	14.8601	-0.191759	0.280021	0.493468	0.824998	OK
C1orf51	130.675	0.145622	0.174933	0.405157	0.772314	OK
MRPS21	2461.37	0.28165	0.100501	0.0050714	0.0854922	OK
PRPF3	1006.71	0.0890798	0.100723	0.376477	0.755073	OK
RPRD2	955.544	-0.00571269	0.0811029	0.943845	0.98653	OK
TARS2	854.94	0.0606182	0.0809289	0.453839	0.803375	OK
ECM1	1730.62	0.230583	0.106103	0.029766	0.247717	OK
LINC00568	3.74453	-0.0157407	0.254438	0.950671	NaN	Low
ADAMTSL4	407.651	0.348383	0.12531	0.00543314	0.0899479	OK
MIR4257	1.69305	0.0980424	0.184438	0.595022	NaN	Low
MCL1	5302.02	-0.063629	0.0730289	0.383599	0.759208	OK
ENSA	1803.18	0.0227495	0.0743733	0.759695	0.932569	OK
GOLPH3L	834.186	-0.145842	0.104053	0.161032	0.553819	OK
HORMAD1	41.173	-0.0552154	0.242606	0.819963	0.948641	OK
CTSS	171.988	0.245925	0.153888	0.110024	0.468832	OK
CTSK	106.069	0.0322849	0.192949	0.867116	0.965365	OK
ARNT	804.849	0.249931	0.113013	0.0269997	0.233959	OK
SETDB1	525.126	0.0671778	0.0976879	0.491656	0.823856	OK
CERS2	2035.46	0.0811744	0.0758949	0.284816	0.685371	OK
ANXA9	39.1977	0.6019	0.237099	0.0111295	0.138839	OK
FAM63A	327.469	0.0842003	0.117355	0.473077	0.813161	OK
PRUNE	290.09	-0.0941891	0.119746	0.43153	0.790539	OK
BNIPL	97.2834	-0.0299928	0.177721	0.865983	0.964914	OK
C1orf56	17.3635	0.218736	0.277898	0.431218	0.790523	OK
CDC42SE1	4000.91	0.0634347	0.0753015	0.399559	0.768759	OK
MLLT11	1237.23	0.304508	0.0982	0.00192939	0.0446352	OK
GABPB2	151.244	0.0945756	0.14868	0.52471	0.842362	OK
SEMA6C	48.3773	0.206619	0.237697	0.384708	0.759539	OK
TNFAIP8L2	0.210173	-0.0447319	0.0702204	0.524111	NaN	Low
TNFAIP8L2-SCNM1	0	NaN	NaN	NaN	NaN	Low
LYSMD1	125.472	0.0354021	0.174799	0.839503	0.956698	OK
SCNM1	2.71354	-0.125047	0.186853	0.50335	NaN	Low
TMOD4	4.61918	-0.210872	0.260008	0.417353	NaN	Low
VPS72	1113.97	0.139973	0.0787696	0.0755699	0.40097	OK
PIP5K1A	2649.34	-0.00105236	0.0835365	0.989949	0.997267	OK
PSMD4	1675.05	0.182072	0.0861156	0.0344921	0.268649	OK
ZNF687	359.778	0.0315433	0.129789	0.807978	0.944025	OK
PI4KB	1234.96	0.160083	0.0862624	0.0634867	0.368665	OK
RFX5	1363.45	0.138352	0.0745009	0.0633031	0.368665	OK
SELENBP1	61.7037	-0.0773168	0.214568	0.718595	0.917765	OK
PSMB4	1763.28	0.113913	0.0813155	0.161253	0.553888	OK
POGZ	1202.84	-0.00271426	0.0814281	0.973409	0.993601	OK
CGN	703.073	-0.0766993	0.0959995	0.424317	0.785319	OK
TUFT1	1138.38	0.215909	0.09961	0.0301936	0.249767	OK
MIR554	0	NaN	NaN	NaN	NaN	Low
SNX27	716.546	-0.0982124	0.0920772	0.286138	0.687029	OK
CELF3	0	NaN	NaN	NaN	NaN	Low
RIIAD1	0	NaN	NaN	NaN	NaN	Low
MRPL9	413.071	0.135378	0.110485	0.220459	0.624451	OK
OAZ3	21.6724	0.0806986	0.274038	0.768392	0.934369	OK
TDRKH	184.987	-0.250254	0.146521	0.0876409	0.426724	OK
LINGO4	0.0774984	0.0195616	0.0472692	0.678995	NaN	Low
RORC	20.1132	-0.269939	0.275774	0.327659	0.726828	OK
C2CD4D	2.33548	-0.10226	0.232737	0.660387	NaN	Low
LOC100132111	10.4434	0.0207492	0.284268	0.941813	0.986025	OK
THEM5	0.227892	0.0456636	0.0717276	0.52437	NaN	Low
THEM4	292.456	-0.0667097	0.124135	0.590994	0.871001	OK
S100A10	28768	-0.0483887	0.109413	0.658303	0.892791	OK
S100A11	38605.3	0.142222	0.135213	NaN	NaN	Outlier
TCHHL1	12.0088	-0.52892	0.285743	0.0641648	0.369723	OK
TCHH	17.6299	-0.0896478	0.272402	0.742079	0.928254	OK
RPTN	23.0939	-0.271717	0.271832	0.317515	0.71831	OK
HRNR	2.06452	-0.250909	0.175315	0.152376	NaN	Low
FLG	108.862	0.00446959	0.195023	0.981715	0.995371	OK
FLG2	0.407693	-0.104964	0.105618	0.320318	NaN	Low
CRNN	30.5825	0.187162	0.274461	0.495288	0.826548	OK
LCE5A	0.520167	0.0302406	0.106721	0.776901	NaN	Low
CRCT1	110.011	0.827817	0.208719	7.30338e-05	0.00356543	OK
LCE3E	1.5388	0.181018	0.193383	0.349242	NaN	Low
LCE3D	6.33659	0.0354153	0.268103	0.894909	NaN	Low
LCE3C	0.232495	0.0520903	0.076326	0.494941	NaN	Low
LCE3B	0	NaN	NaN	NaN	NaN	Low
LCE3A	0	NaN	NaN	NaN	NaN	Low
LCE2D	0	NaN	NaN	NaN	NaN	Low
LCE2C	0.131153	-0.0312393	0.0589286	0.596028	NaN	Low
LCE2B	0	NaN	NaN	NaN	NaN	Low
LCE2A	0	NaN	NaN	NaN	NaN	Low
LCE4A	0	NaN	NaN	NaN	NaN	Low
C1orf68	1.24205	0.111556	0.181074	0.537841	NaN	Low
KPRP	23.7927	-0.576431	0.265854	0.0301417	0.249504	OK
LCE1F	2.11436	-0.177433	0.196902	0.367523	NaN	Low
LCE1E	12.614	-0.0306102	0.285205	0.91453	0.979287	OK
LCE1D	0	NaN	NaN	NaN	NaN	Low
LCE1C	8.83791	-0.0727064	0.287043	0.80004	NaN	Low
LCE1B	9.4243	-0.180178	0.277414	0.51602	NaN	Low
LCE1A	0	NaN	NaN	NaN	NaN	Low
LCE6A	0	NaN	NaN	NaN	NaN	Low
SMCP	0.232495	0.0520903	0.076326	0.494941	NaN	Low
IVL	2145.22	0.972313	0.141411	NaN	NaN	Outlier
SPRR4	0.438064	0.00119866	0.0977343	0.990215	NaN	Low
SPRR1A	225.347	0.682892	0.15785	1.51694e-05	0.000908701	OK
SPRR3	903.936	0.138869	0.114723	0.226099	0.628898	OK
SPRR1B	2566.26	0.472819	0.166676	NaN	NaN	Outlier
SPRR2D	365.376	2.60728	0.188444	1.54908e-43	1.74623e-40	OK
SPRR2A	506.664	1.55832	0.153045	2.38424e-24	9.23894e-22	OK
SPRR2B	0.67504	0.141231	0.12286	0.250339	NaN	Low
SPRR2E	47.1477	2.43674	0.25966	6.3304e-21	1.96243e-18	OK
SPRR2F	3.26078	0.702178	0.235238	0.00283603	NaN	Low
SPRR2C	2.72608	0.346026	0.223349	0.121319	NaN	Low
SPRR2G	0.433747	0.000695227	0.097478	0.994309	NaN	Low
LELP1	0	NaN	NaN	NaN	NaN	Low
PRR9	0	NaN	NaN	NaN	NaN	Low
LOR	0	NaN	NaN	NaN	NaN	Low
PGLYRP3	13.9621	0.397679	0.286961	0.165799	0.559037	OK
PGLYRP4	104.22	1.81085	0.17904	4.77666e-24	1.79487e-21	OK
S100A9	12315.2	1.08721	0.0805921	1.78342e-41	1.38215e-38	OK
S100A12	53.0447	0.959368	0.237504	5.35939e-05	0.00281595	OK
S100A8	1707.56	1.7791	0.12392	9.6412e-47	1.32834e-43	OK
S100A7A	3.15262	0.623577	0.239078	0.00910053	NaN	Low
S100A7L2	0	NaN	NaN	NaN	NaN	Low
S100A7	10.7321	1.48753	0.285907	1.96263e-07	1.79436e-05	OK
S100A6	26702.6	0.197881	0.100116	0.0480967	0.320668	OK
S100A5	1.18937	0.20177	0.164073	0.218788	NaN	Low
S100A4	195.619	0.0616702	0.131511	0.639116	0.889255	OK
S100A3	138.445	-0.00958232	0.169942	0.955034	0.989115	OK
S100A2	123398	-0.0830697	0.0678532	0.220855	0.62454	OK
S100A16	7855.71	0.150874	0.104209	0.147672	0.533182	OK
S100A14	31821.7	0.062444	0.0743419	0.400933	0.769831	OK
S100A13	752.164	-0.0417404	0.0992234	0.673995	0.899262	OK
S100A1	0.912139	0.214313	0.14813	0.147956	NaN	Low
CHTOP	713.878	0.105743	0.103058	0.304866	0.70622	OK
SNAPIN	177.781	-0.183438	0.135305	0.175182	0.571045	OK
ILF2	2584.64	0.158312	0.0991321	0.110271	0.469204	OK
NPR1	0.0774984	0.0195616	0.0472692	0.678995	NaN	Low
INTS3	1312.76	0.0219197	0.0719411	0.760603	0.932569	OK
SLC27A3	59.1479	-0.00398737	0.230145	0.986177	0.995936	OK
GATAD2B	746.939	-0.0269394	0.104127	0.795854	0.943116	OK
DENND4B	344.131	0.106096	0.136063	0.435534	0.791892	OK
CRTC2	1025.24	0.117441	0.110916	0.289679	0.690773	OK
SLC39A1	1997.61	0.0196881	0.0700148	0.778558	0.938441	OK
CREB3L4	66.6224	0.219627	0.215605	0.308367	0.708891	OK
JTB	551.033	-0.0117878	0.105512	0.911046	0.978484	OK
RAB13	2122.94	0.173166	0.0942695	0.066221	0.374437	OK
RPS27	7746.97	0.0914525	0.122353	0.454795	0.804029	OK
NUP210L	0.67006	-0.0890484	0.114863	0.438187	NaN	Low
TPM3	5166.49	0.168157	0.0900658	0.0618955	0.365652	OK
MIR190B	0	NaN	NaN	NaN	NaN	Low
C1orf189	0.420346	-0.0779622	0.0918999	0.39625	NaN	Low
C1orf43	1573.9	-0.0668614	0.0851737	0.432453	0.790539	OK
UBAP2L	7002.88	0.095186	0.0963542	0.323214	0.722635	OK
HAX1	913.284	0.179262	0.0896239	0.0454829	0.3142	OK
AQP10	6.51141	-0.0179182	0.268016	0.946697	NaN	Low
ATP8B2	396.413	0.106922	0.113242	0.34507	0.737991	OK
IL6R	665.056	-0.558592	0.12414	6.80483e-06	0.000444105	OK
SHE	0.210173	-0.0447319	0.0702204	0.524111	NaN	Low
TDRD10	0	NaN	NaN	NaN	NaN	Low
UBE2Q1	1606.8	-0.065633	0.0746231	0.379116	0.756889	OK
CHRNB2	1.7413	-0.0746377	0.190029	0.694489	NaN	Low
ADAR	4374.52	0.243365	0.0883799	0.00589397	0.09467	OK
KCNN3	0.748187	-0.0576858	0.116209	0.619613	NaN	Low
PMVK	161.438	0.0505249	0.162198	0.75542	0.931576	OK
PBXIP1	914.392	-0.116975	0.102347	0.253069	0.656361	OK
PYGO2	359.162	0.0884623	0.108021	0.412823	0.778201	OK
SHC1	12355.7	0.206052	0.0797651	0.00978804	0.129458	OK
CKS1B	317.59	0.194269	0.182575	0.287304	0.688007	OK
MIR4258	3.80197	0.0781205	0.25756	0.761654	NaN	Low
FLAD1	617.093	0.231706	0.105349	0.0278491	0.237503	OK
LENEP	0	NaN	NaN	NaN	NaN	Low
ZBTB7B	1100.16	0.00591199	0.141353	0.966639	0.991804	OK
DCST2	3.80041	-0.00336946	0.250112	0.989251	NaN	Low
DCST1	0.967342	-0.0594175	0.149391	0.690829	NaN	Low
LOC100505666	18.3007	-0.399824	0.276841	0.148672	0.533804	OK
ADAM15	4123.95	0.0358507	0.118596	0.762429	0.932569	OK
EFNA4	157.466	0.161577	0.162096	0.318861	0.71831	OK
EFNA3	221.456	0.200269	0.136402	0.142042	0.524943	OK
EFNA1	1304.94	0.708794	0.0948146	7.68629e-14	1.7983e-11	OK
SLC50A1	896.337	0.0238342	0.130319	0.854883	0.961864	OK
DPM3	114.455	0.00229958	0.240079	NaN	NaN	Outlier
KRTCAP2	517.911	0.124497	0.128924	0.334212	0.732197	OK
TRIM46	63.2373	0.295283	0.224907	0.189214	0.591087	OK
MUC1	853.958	0.0488106	0.12163	0.688195	0.904065	OK
MIR92B	0	NaN	NaN	NaN	NaN	Low
THBS3	358.195	0.308094	0.121352	0.0111216	0.138839	OK
MTX1	205.245	0.0963394	0.156814	0.538982	0.848505	OK
GBAP1	22.4054	-0.113998	0.273268	0.676558	0.900328	OK
GBA	758.974	0.0839289	0.1083	0.43836	0.794248	OK
FAM189B	668.957	0.148184	0.111434	0.183587	0.583405	OK
SCAMP3	595.454	0.0646618	0.113036	0.56729	0.859748	OK
CLK2	802.4	0.0199151	0.102933	0.846586	0.959041	OK
HCN3	44.6237	-0.0951483	0.224303	0.671424	0.89787	OK
PKLR	0.309994	0.0661301	0.0856091	0.439839	NaN	Low
FDPS	4851.1	0.472103	0.0983089	1.56902e-06	0.000117204	OK
RUSC1-AS1	18.0199	0.201925	0.279783	NaN	NaN	Outlier
RUSC1	403.543	0.136485	0.118136	0.247962	0.652531	OK
ASH1L	1450.64	-0.106972	0.0918421	0.244123	0.648345	OK
MIR555	0	NaN	NaN	NaN	NaN	Low
POU5F1P4	0	NaN	NaN	NaN	NaN	Low
ASH1L-AS1	6.93278	-0.059234	0.243467	0.807778	NaN	Low
MSTO1	7.82309	0.0640848	0.280833	0.819495	NaN	Low
MSTO2P	37.2866	-0.279907	0.232663	0.228954	0.631737	OK
YY1AP1	1057.46	0.214721	0.121557	0.0773238	0.405669	OK
DAP3	1144.38	0.199199	0.110518	0.0714817	0.38876	OK
GON4L	1199.23	0.13995	0.0727535	0.0544016	0.344549	OK
SYT11	17.3461	0.117717	0.2851	0.679683	0.901397	OK
RIT1	666.837	0.0184447	0.106794	0.862877	0.964221	OK
KIAA0907	889.444	-0.0898792	0.0987248	0.362611	0.747097	OK
SNORA42	0.670723	0.103536	0.105853	0.328021	NaN	Low
SCARNA4	1.221	0.048055	0.164031	0.76955	NaN	Low
RXFP4	0.210173	-0.0447319	0.0702204	0.524111	NaN	Low
ARHGEF2	1030.35	0.336343	0.0796614	2.41975e-05	0.00138911	OK
SSR2	2012.13	0.142502	0.0752155	0.0581467	0.356059	OK
UBQLN4	1429.47	0.0790545	0.0695555	0.255719	0.658833	OK
LAMTOR2	1251.17	0.262381	0.143353	0.0672034	0.376899	OK
RAB25	1365.79	0.121184	0.086586	0.16164	0.554231	OK
MEX3A	366.583	0.250362	0.136827	0.0672843	0.377011	OK
LMNA	2780.84	-0.0538002	0.148911	NaN	NaN	Outlier
SEMA4A	191.125	0.151205	0.134847	0.262158	0.665491	OK
SLC25A44	769.553	0.0280937	0.0892794	0.753011	0.930154	OK
PMF1	105.433	0.246553	0.182194	0.175979	0.572138	OK
PMF1-BGLAP	0	NaN	NaN	NaN	NaN	Low
BGLAP	0	NaN	NaN	NaN	NaN	Low
PAQR6	65.2478	-0.310173	0.224743	0.167548	0.561044	OK
SMG5	1401.91	0.0575449	0.0794646	0.468969	0.811065	OK
TMEM79	246.519	0.0309975	0.119871	0.795952	0.943116	OK
C1orf85	1115.25	-0.067599	0.132329	0.609462	0.877331	OK
VHLL	0.420346	-0.0779622	0.0918999	0.39625	NaN	Low
CCT3	6158.01	0.176991	0.0923975	0.0554233	0.346716	OK
TSACC	25.4638	-0.10614	0.277709	0.702314	0.911049	OK
RHBG	0.812318	0.0928985	0.14071	0.509118	NaN	Low
C1orf61	0	NaN	NaN	NaN	NaN	Low
MIR9-1	0	NaN	NaN	NaN	NaN	Low
MEF2D	1107.12	0.124286	0.0766456	0.104895	0.458479	OK
IQGAP3	145.986	-0.1056	0.14328	0.461111	0.806445	OK
TTC24	0	NaN	NaN	NaN	NaN	Low
APOA1BP	602.711	0.10833	0.0925442	0.241771	0.645565	OK
GPATCH4	1029.95	0.0589004	0.118661	0.61963	0.880299	OK
HAPLN2	0.223574	0.0450816	0.0712796	0.527085	NaN	Low
BCAN	0.131153	-0.0312393	0.0589286	0.596028	NaN	Low
NES	9.81494	0.20106	0.281023	0.474326	NaN	Low
CRABP2	2786.36	0.142242	0.0803957	0.0768478	0.404978	OK
ISG20L2	862.781	0.36267	0.0968139	0.000179638	0.00723013	OK
RRNAD1	168.107	-0.0125635	0.169482	0.940908	0.985743	OK
MRPL24	723.236	0.134136	0.0990136	0.175507	0.571319	OK
HDGF	9220.15	0.404929	0.0647914	4.11169e-10	6.14276e-08	OK
PRCC	862.471	0.159754	0.0791176	0.0434664	0.307721	OK
SH2D2A	27.5177	0.486818	0.283618	0.0860789	0.424574	OK
NTRK1	0	NaN	NaN	NaN	NaN	Low
INSRR	0	NaN	NaN	NaN	NaN	Low
PEAR1	295.013	0.255221	0.112178	0.0228972	0.212762	OK
LRRC71	2.30096	-0.112224	0.202351	0.579169	NaN	Low
ARHGEF11	636.741	-0.030354	0.102042	0.76611	0.933387	OK
MIR765	0	NaN	NaN	NaN	NaN	Low
ETV3L	0	NaN	NaN	NaN	NaN	Low
ETV3	310.302	0.274627	0.139452	0.0489153	0.324532	OK
CYCSP52	0.210173	-0.0447319	0.0702204	0.524111	NaN	Low
FCRL5	0	NaN	NaN	NaN	NaN	Low
FCRL4	0	NaN	NaN	NaN	NaN	Low
FCRL3	0	NaN	NaN	NaN	NaN	Low
FCRL2	0	NaN	NaN	NaN	NaN	Low
FCRL1	0	NaN	NaN	NaN	NaN	Low
CD5L	0	NaN	NaN	NaN	NaN	Low
KIRREL	615.824	0.297242	0.0909201	0.00107829	0.0288785	OK
LOC646268	18.4167	0.0299606	0.279407	0.914607	0.979287	OK
CD1D	23.9729	0.306136	0.268844	0.254824	0.658248	OK
CD1A	0	NaN	NaN	NaN	NaN	Low
CD1C	0	NaN	NaN	NaN	NaN	Low
CD1B	0	NaN	NaN	NaN	NaN	Low
CD1E	0	NaN	NaN	NaN	NaN	Low
OR10T2	0	NaN	NaN	NaN	NaN	Low
OR10K2	0	NaN	NaN	NaN	NaN	Low
OR10K1	0	NaN	NaN	NaN	NaN	Low
OR10R2	0	NaN	NaN	NaN	NaN	Low
OR6Y1	0	NaN	NaN	NaN	NaN	Low
OR6P1	0	NaN	NaN	NaN	NaN	Low
OR10X1	0	NaN	NaN	NaN	NaN	Low
OR10Z1	0	NaN	NaN	NaN	NaN	Low
SPTA1	0	NaN	NaN	NaN	NaN	Low
OR6K2	0	NaN	NaN	NaN	NaN	Low
OR6K3	0	NaN	NaN	NaN	NaN	Low
OR6K6	0	NaN	NaN	NaN	NaN	Low
OR6N1	0	NaN	NaN	NaN	NaN	Low
OR6N2	0	NaN	NaN	NaN	NaN	Low
MNDA	0	NaN	NaN	NaN	NaN	Low
PYHIN1	3.35454	-0.0811874	0.193001	0.674005	NaN	Low
IFI16	3578.16	0.0522511	0.0811707	0.519757	0.839959	OK
AIM2	7.96026	0.290465	0.28543	0.308849	NaN	Low
CADM3	0.197521	-0.0428081	0.0687346	0.533415	NaN	Low
LOC100131825	0	NaN	NaN	NaN	NaN	Low
DARC	0	NaN	NaN	NaN	NaN	Low
FCER1A	0	NaN	NaN	NaN	NaN	Low
OR10J3	0	NaN	NaN	NaN	NaN	Low
OR10J1	0	NaN	NaN	NaN	NaN	Low
OR10J5	0	NaN	NaN	NaN	NaN	Low
APCS	0	NaN	NaN	NaN	NaN	Low
CRP	0	NaN	NaN	NaN	NaN	Low
DUSP23	126.812	-0.291893	0.174657	0.0946741	0.440438	OK
FCRL6	0	NaN	NaN	NaN	NaN	Low
SLAMF8	0.227892	0.0456636	0.0717276	0.52437	NaN	Low
C1orf204	7.55312	-0.046965	0.280638	0.867094	NaN	Low
VSIG8	0.5649	-0.0373645	0.121915	0.759239	NaN	Low
CCDC19	14.3302	-0.00348915	0.285015	0.990233	0.997267	OK
TAGLN2	14636.1	0.220971	0.0738123	0.00275622	0.0569619	OK
IGSF9	369.745	-0.0556093	0.182647	0.760775	0.932569	OK
SLAMF9	166.927	0.567574	0.15793	0.00032584	0.0118836	OK
LOC100505633	483.332	0.0780567	0.132683	0.556335	0.855484	OK
PIGM	109.518	-0.107688	0.208429	0.605391	0.876365	OK
KCNJ10	0.197521	-0.0428081	0.0687346	0.533415	NaN	Low
KCNJ9	0.945579	0.0505328	0.158746	0.750239	NaN	Low
IGSF8	397.563	0.318572	0.138867	0.0217863	0.207488	OK
ATP1A2	0.359045	0.0129244	0.092507	0.888887	NaN	Low
ATP1A4	0	NaN	NaN	NaN	NaN	Low
CASQ1	0	NaN	NaN	NaN	NaN	Low
PEA15	5972.43	0.0839511	0.0910708	0.356621	0.743782	OK
DCAF8	1666.16	-0.0966685	0.0890892	0.277888	0.68115	OK
PEX19	1114.33	0.000713274	0.107014	0.994682	0.998851	OK
COPA	3696.37	0.0605657	0.0797106	0.447362	0.798057	OK
SUMO1P3	13.3683	0.0952772	0.284423	0.737637	0.926544	OK
NCSTN	3027.61	0.026101	0.0792969	0.742038	0.928254	OK
NHLH1	6.9994	0.0200981	0.282895	0.943362	NaN	Low
VANGL2	1015.48	-0.262676	0.0971162	0.0068354	0.104255	OK
SLAMF6	0.395041	-0.0750007	0.0902139	0.405768	NaN	Low
CD84	0	NaN	NaN	NaN	NaN	Low
SLAMF1	0	NaN	NaN	NaN	NaN	Low
CD48	0.131153	-0.0312393	0.0589286	0.596028	NaN	Low
SLAMF7	269.556	-0.529282	0.14841	0.000361983	0.0128246	OK
LY9	0	NaN	NaN	NaN	NaN	Low
CD244	0	NaN	NaN	NaN	NaN	Low
ITLN1	0	NaN	NaN	NaN	NaN	Low
ITLN2	0.223574	0.0450816	0.0712796	0.527085	NaN	Low
F11R	6238.34	-0.0281801	0.0786878	0.720249	0.918742	OK
TSTD1	186.358	-0.068595	0.179638	0.702572	0.911171	OK
USF1	863.819	0.124751	0.101318	0.218218	0.623474	OK
ARHGAP30	39.08	0.342965	0.259101	0.185611	0.585942	OK
PVRL4	468.489	0.122143	0.0964715	0.205477	0.609112	OK
KLHDC9	11.1697	-0.184323	0.279993	0.510338	0.835735	OK
PFDN2	788.409	0.276038	0.110705	0.0126509	0.150983	OK
NIT1	443.9	0.053271	0.115374	0.644278	0.889362	OK
DEDD	538.667	0.0958701	0.0927621	0.301368	0.703805	OK
UFC1	1151.54	0.19546	0.105161	0.0630731	0.368119	OK
USP21	217.004	0.0952407	0.141053	0.499541	0.82939	OK
PPOX	116.959	-0.0396872	0.156407	0.799694	0.943116	OK
B4GALT3	527.152	0.155787	0.107231	0.146273	0.531746	OK
ADAMTS4	0.679357	0.141616	0.123012	0.249634	NaN	Low
NDUFS2	1198.85	0.201013	0.097209	0.0386545	0.288918	OK
FCER1G	2.82232	0.114639	0.230369	0.618743	NaN	Low
APOA2	0.227892	0.0456636	0.0717276	0.52437	NaN	Low
TOMM40L	348.975	0.261528	0.11964	0.0288189	0.242768	OK
MIR5187	0.407693	-0.104964	0.105618	0.320318	NaN	Low
NR1I3	2.93954	0.0740923	0.194565	0.703344	NaN	Low
PCP4L1	17.2444	0.00665066	0.282628	0.981226	0.995371	OK
MPZ	36.0393	-0.00168525	0.25275	0.99468	0.998851	OK
SDHC	1203.34	-0.126695	0.0914829	0.166083	0.559485	OK
C1orf192	7.93363	-0.0577667	0.24368	0.812611	NaN	Low
FCGR2A	3.05839	0.0602832	0.242676	0.803817	NaN	Low
HSPA6	22.9456	-0.0281623	0.270254	0.917005	0.979546	OK
FCGR3A	0	NaN	NaN	NaN	NaN	Low
FCGR2C	0	NaN	NaN	NaN	NaN	Low
HSPA7	4.19422	0.416707	0.260637	0.109864	NaN	Low
FCGR3B	0	NaN	NaN	NaN	NaN	Low
FCGR2B	0	NaN	NaN	NaN	NaN	Low
RPL31P11	0	NaN	NaN	NaN	NaN	Low
FCRLA	23.4588	0.0711786	0.267133	0.78989	0.941792	OK
FCRLB	6.04242	0.0699102	0.269071	0.795002	NaN	Low
DUSP12	165.038	0.00528399	0.170086	0.975216	0.994301	OK
ATF6	1322.86	-0.108507	0.0857851	0.205916	0.60954	OK
OLFML2B	0	NaN	NaN	NaN	NaN	Low
NOS1AP	10.3071	-0.0498518	0.283973	0.860647	0.963732	OK
MIR4654	0	NaN	NaN	NaN	NaN	Low
MIR556	0	NaN	NaN	NaN	NaN	Low
C1orf111	0	NaN	NaN	NaN	NaN	Low
C1orf226	49.2915	-0.151526	0.220851	0.492651	0.824521	OK
SH2D1B	1.26767	-0.0881426	0.176526	0.617556	NaN	Low
UHMK1	744.38	-0.330144	0.184238	NaN	NaN	Outlier
UAP1	873.698	0.266694	0.122452	0.0294093	0.246203	OK
DDR2	4.52945	0.0438872	0.250355	0.860844	NaN	Low
HSD17B7	124.069	-0.264796	0.1656	0.109818	0.468437	OK
C1orf110	0	NaN	NaN	NaN	NaN	Low
RGS4	3.63189	-0.204326	0.255955	0.424703	NaN	Low
RGS5	69.4251	-0.339473	0.232123	0.143612	0.527992	OK
NUF2	67.9774	-0.277393	0.201723	0.169095	0.563262	OK
PBX1	333.41	-0.628763	0.114372	3.85164e-08	4.34185e-06	OK
LOC100505795	0	NaN	NaN	NaN	NaN	Low
LMX1A	0.210173	-0.0447319	0.0702204	0.524111	NaN	Low
RXRG	0.407693	-0.104964	0.105618	0.320318	NaN	Low
LOC400794	0	NaN	NaN	NaN	NaN	Low
LRRC52	0	NaN	NaN	NaN	NaN	Low
MGST3	2147.96	0.136504	0.10197	0.180681	0.579374	OK
ALDH9A1	800.176	-0.125538	0.108913	0.24906	0.653188	OK
LOC440700	0	NaN	NaN	NaN	NaN	Low
TMCO1	1383.79	-0.0618465	0.0773845	0.424168	0.785319	OK
UCK2	746.308	0.321732	0.0972066	0.000933706	0.0259015	OK
MIR3658	0	NaN	NaN	NaN	NaN	Low
FAM78B	1.76392	-0.0336533	0.206906	0.870794	NaN	Low
MIR921	0	NaN	NaN	NaN	NaN	Low
FMO9P	0.328674	-0.0929385	0.0996991	0.351238	NaN	Low
POGK	820.704	0.0230973	0.0937603	0.805416	0.94391	OK
TADA1	93.9585	-0.101294	0.203108	0.617977	0.87979	OK
ILDR2	0	NaN	NaN	NaN	NaN	Low
MAEL	0	NaN	NaN	NaN	NaN	Low
GPA33	0	NaN	NaN	NaN	NaN	Low
DUSP27	0	NaN	NaN	NaN	NaN	Low
POU2F1	431.316	-0.122451	0.119702	0.306323	0.70813	OK
CD247	0.592562	-0.10078	0.103828	0.331728	NaN	Low
CREG1	635.104	-0.356273	0.104146	0.000624113	0.019156	OK
RCSD1	9.14434	-0.487541	0.275119	0.0763763	NaN	Low
MPZL1	3522.26	-0.0267909	0.0649847	0.680146	0.901397	OK
ADCY10	1.23338	-0.185079	0.183762	0.313855	NaN	Low
MPC2	206.916	-0.279995	0.173601	0.106775	0.462869	OK
DCAF6	1495.79	0.0398239	0.0951932	0.675692	0.900246	OK
GPR161	433.273	0.231688	0.106554	0.0296762	0.247136	OK
TIPRL	705.357	0.0087089	0.167263	NaN	NaN	Outlier
SFT2D2	88.1215	0.137627	0.188231	0.464682	0.808315	OK
ANKRD36BP1	0.542489	0.101223	0.104707	0.333681	NaN	Low
TBX19	54.375	-0.20468	0.216351	0.34412	0.73747	OK
MIR557	0	NaN	NaN	NaN	NaN	Low
LOC100505918	0	NaN	NaN	NaN	NaN	Low
XCL2	0	NaN	NaN	NaN	NaN	Low
XCL1	0	NaN	NaN	NaN	NaN	Low
DPT	0	NaN	NaN	NaN	NaN	Low
LINC00626	0	NaN	NaN	NaN	NaN	Low
ATP1B1	1763.35	0.335738	0.0888339	0.000157214	0.00645515	OK
NME7	357.59	-0.263276	0.168298	0.117737	0.482465	OK
BLZF1	564.545	0.0645491	0.11381	0.570601	0.860948	OK
C1orf114	11.9051	0.317993	0.286347	0.266777	0.670333	OK
SLC19A2	107.023	-0.145183	0.188896	0.442138	0.794444	OK
F5	11.2147	-0.109414	0.287131	0.703158	0.911171	OK
SELP	1.44591	-0.258435	0.158944	0.10396	NaN	Low
SELL	2.79407	0.260031	0.216899	0.230584	NaN	Low
SELE	0	NaN	NaN	NaN	NaN	Low
METTL18	64.5934	-0.13279	0.21347	0.533906	0.846906	OK
C1orf112	64.4841	0.012706	0.194816	0.947999	0.987333	OK
SCYL3	172.152	-0.0235753	0.152124	0.876841	0.967758	OK
KIFAP3	443.619	-0.207547	0.117702	0.0778442	0.405838	OK
METTL11B	0	NaN	NaN	NaN	NaN	Low
MIR3119-2	0	NaN	NaN	NaN	NaN	Low
MIR3119-1	0	NaN	NaN	NaN	NaN	Low
LOC284688	0	NaN	NaN	NaN	NaN	Low
GORAB	90.6144	-0.163567	0.199134	0.411423	0.777215	OK
PRRX1	0.661639	0.0489913	0.12528	0.695758	NaN	Low
MROH9	0.210173	-0.0447319	0.0702204	0.524111	NaN	Low
FMO3	4.42012	-0.38716	0.252069	0.124557	NaN	Low
MIR1295A	0	NaN	NaN	NaN	NaN	Low
MIR1295B	0	NaN	NaN	NaN	NaN	Low
FMO6P	0.556566	-0.0352324	0.12154	0.771905	NaN	Low
FMO2	16.5641	-0.220004	0.287063	0.443441	0.794905	OK
FMO1	0	NaN	NaN	NaN	NaN	Low
FMO4	35.9064	-0.231346	0.252573	0.359689	0.745717	OK
TOP1P1	2.33923	0.137991	0.197727	0.485246	NaN	Low
PRRC2C	10327.6	0.00569564	0.0749426	0.939419	0.984849	OK
MYOC	0	NaN	NaN	NaN	NaN	Low
VAMP4	205.519	-0.299606	0.221081	NaN	NaN	Outlier
METTL13	548.904	0.165155	0.103463	0.110429	0.469352	OK
DNM3	36.6163	-0.23655	0.235372	0.314895	0.715659	OK
DNM3OS	0	NaN	NaN	NaN	NaN	Low
MIR214	0	NaN	NaN	NaN	NaN	Low
MIR3120	0	NaN	NaN	NaN	NaN	Low
MIR199A2	0	NaN	NaN	NaN	NaN	Low
C1orf105	0.197521	-0.0428081	0.0687346	0.533415	NaN	Low
PIGC	140.822	0.0807492	0.156558	0.606009	0.876365	OK
SUCO	391.668	-0.172598	0.178812	NaN	NaN	Outlier
FASLG	1.12386	-0.0539589	0.167105	0.746767	NaN	Low
TNFSF18	0.485192	-0.0770539	0.11856	0.515746	NaN	Low
TNFSF4	13.689	0.130619	0.286882	0.648889	0.890382	OK
LOC100506023	2.6989	-0.0343483	0.227741	0.880116	NaN	Low
PRDX6	1672.42	0.0575123	0.0825117	0.48579	0.820681	OK
SLC9C2	0.580409	0.0520384	0.126824	0.68157	NaN	Low
ANKRD45	4.40833	-0.341027	0.24793	0.168977	NaN	Low
LOC730159	0	NaN	NaN	NaN	NaN	Low
KLHL20	463.836	-0.130127	0.0997859	0.192214	0.596047	OK
CENPL	67.1616	0.327538	0.219868	0.136301	0.513839	OK
DARS2	624.576	-0.0464471	0.0962055	0.629245	0.885144	OK
GAS5-AS1	3.91779	-0.410558	0.242222	0.0900828	NaN	Low
GAS5	1836.54	-0.0913559	0.08048	0.256318	0.659101	OK
SNORD81	0	NaN	NaN	NaN	NaN	Low
SNORD47	0.131153	-0.0312393	0.0589286	0.596028	NaN	Low
SNORD80	5.59615	0.0407868	0.276417	0.882694	NaN	Low
SNORD79	0	NaN	NaN	NaN	NaN	Low
SNORD78	1.38841	0.1338	0.176633	0.448749	NaN	Low
SNORD44	16.4354	-0.096415	0.286042	NaN	NaN	Outlier
SNORD77	0.131153	-0.0312393	0.0589286	0.596028	NaN	Low
SNORD76	14.7021	-0.101491	0.287063	0.723676	0.921124	OK
SNORD75	0.438064	0.00119866	0.0977343	0.990215	NaN	Low
SNORD74	5.57481	-0.451485	0.277956	0.104311	NaN	Low
ZBTB37	19.569	-0.139909	0.275655	0.611768	0.878305	OK
SERPINC1	2.34309	0.198088	0.196895	0.314386	NaN	Low
RC3H1	443.567	-0.0869771	0.118098	0.461438	0.806445	OK
RABGAP1L	689.559	-0.12327	0.0896857	0.169298	0.563262	OK
GPR52	0.210173	-0.0447319	0.0702204	0.524111	NaN	Low
CACYBP	671.586	0.0498834	0.0957581	0.602414	0.875282	OK
MRPS14	274.357	-0.02789	0.14204	0.844333	0.958065	OK
TNN	0	NaN	NaN	NaN	NaN	Low
KIAA0040	549.146	0.0967906	0.108202	0.371033	0.752205	OK
TNR	0	NaN	NaN	NaN	NaN	Low
RFWD2	351.454	-0.0978657	0.130542	0.453442	0.803126	OK
SCARNA3	0	NaN	NaN	NaN	NaN	Low
PAPPA2	4.58467	-0.0116708	0.225678	0.958756	NaN	Low
ASTN1	5.56957	0.403311	0.275039	0.142545	NaN	Low
MIR488	0	NaN	NaN	NaN	NaN	Low
FAM5B	0	NaN	NaN	NaN	NaN	Low
SEC16B	53.2219	-0.138569	0.228158	0.543627	0.850657	OK
LOC730102	103.417	-0.0938606	0.190197	0.621666	0.881348	OK
RASAL2-AS1	4.63268	-0.0108698	0.271201	0.968029	NaN	Low
RASAL2	1271.49	-0.123077	0.0870079	0.157202	0.546177	OK
TEX35	0.227892	0.0456636	0.0717276	0.52437	NaN	Low
C1orf220	1.3732	0.0722635	0.195228	0.711271	NaN	Low
MIR4424	0	NaN	NaN	NaN	NaN	Low
RALGPS2	403.915	-0.285774	0.128848	0.0265606	0.233087	OK
ANGPTL1	0	NaN	NaN	NaN	NaN	Low
FAM20B	1028.43	-0.0987023	0.130314	0.448797	0.79896	OK
TOR3A	659.676	0.0465079	0.140892	0.741328	0.928254	OK
ABL2	1078.05	0.0413825	0.0881442	0.638722	0.889255	OK
SOAT1	351.023	-0.284385	0.116671	0.0147896	0.165217	OK
AXDND1	1.10891	0.0658719	0.149962	0.660475	NaN	Low
NPHS2	0	NaN	NaN	NaN	NaN	Low
TDRD5	0	NaN	NaN	NaN	NaN	Low
FAM163A	0.131153	-0.0312393	0.0589286	0.596028	NaN	Low
TOR1AIP2	1285.6	-0.0785612	0.0899142	0.382263	0.758725	OK
TOR1AIP1	848.049	-0.111744	0.0892235	0.210422	0.614225	OK
CEP350	638.804	-0.161506	0.103186	0.117535	0.481798	OK
QSOX1	3839.39	0.230903	0.108011	0.032535	0.259438	OK
FLJ23867	1861.87	0.148669	0.0748527	0.0470155	0.318757	OK
LHX4	0.382888	0.104765	0.107138	0.328146	NaN	Low
LOC100527964	60.6129	-0.210918	0.225656	0.349948	0.741469	OK
ACBD6	557.258	-0.211016	0.10112	0.0369071	0.280765	OK
MIR3121	0	NaN	NaN	NaN	NaN	Low
XPR1	871.263	-0.173602	0.116085	0.13479	0.511472	OK
KIAA1614	4.52707	-0.0679586	0.231577	0.769171	NaN	Low
STX6	1159.2	0.110266	0.0796746	0.166373	0.559845	OK
MR1	1476.43	-0.0969977	0.085994	0.259338	0.662639	OK
IER5	585.838	0.0780776	0.0979137	0.425212	0.785435	OK
GM140	0	NaN	NaN	NaN	NaN	Low
CACNA1E	0.131153	-0.0312393	0.0589286	0.596028	NaN	Low
ZNF648	1.48893	-0.11842	0.133238	0.374119	NaN	Low
GLUL	15928.2	0.0561865	0.0746793	0.451828	0.801183	OK
TEDDM1	0	NaN	NaN	NaN	NaN	Low
LINC00272	0	NaN	NaN	NaN	NaN	Low
RGSL1	0	NaN	NaN	NaN	NaN	Low
RNASEL	376.44	-0.217681	0.128468	0.090182	0.433099	OK
RGS16	14.1471	0.121265	0.283096	0.668394	0.896984	OK
LOC284648	0.425412	0.00282532	0.0969767	0.976758	NaN	Low
RGS8	0	NaN	NaN	NaN	NaN	Low
NPL	57.6387	-0.449634	0.232318	0.0529377	0.33814	OK
DHX9	2358.33	0.0708675	0.0771573	0.358367	0.74414	OK
SHCBP1L	0	NaN	NaN	NaN	NaN	Low
LAMC1	7855.1	-4.42833e-05	0.0825394	0.999572	0.999931	OK
LAMC2	103845	0.307428	0.0774601	7.222e-05	0.00353964	OK
NMNAT2	24.1061	-0.239674	0.266232	0.367991	0.750028	OK
SMG7-AS1	0	NaN	NaN	NaN	NaN	Low
SMG7	2056.76	0.106096	0.0781703	0.174703	0.570835	OK
NCF2	426.72	0.478687	0.12203	8.75608e-05	0.00409718	OK
ARPC5	1057.32	-0.0950565	0.188414	NaN	NaN	Outlier
RGL1	60.5339	-0.0494627	0.204267	0.808666	0.944255	OK
APOBEC4	0	NaN	NaN	NaN	NaN	Low
GLT25D2	1.10375	-0.184565	0.169666	0.276678	NaN	Low
TSEN15	123.398	-0.50952	0.238967	NaN	NaN	Outlier
C1orf21	505.027	-0.353401	0.11718	0.00256231	0.0544052	OK
EDEM3	743.207	-0.0573627	0.134569	0.669912	0.896984	OK
FAM129A	505.771	-0.422615	0.111737	0.000155425	0.0064029	OK
RNF2	291.928	-0.232423	0.118764	0.0503462	0.329124	OK
TRMT1L	505.003	-0.385439	0.141604	0.00648963	0.100968	OK
SWT1	91.6955	-0.344835	0.208948	0.0988742	0.447795	OK
IVNS1ABP	2286.93	0.0196399	0.0775005	0.799946	0.943116	OK
LOC100288079	0	NaN	NaN	NaN	NaN	Low
HMCN1	40.6325	0.0149917	0.229194	0.947847	0.987333	OK
MIR548F1	0	NaN	NaN	NaN	NaN	Low
RNU6-72	0	NaN	NaN	NaN	NaN	Low
PRG4	6.62123	-0.0115313	0.241147	0.961861	NaN	Low
TPR	2854.24	-0.0783472	0.075107	0.296883	0.699375	OK
C1orf27	579.333	-0.223265	0.13598	0.100613	0.4517	OK
OCLM	1.92267	0.238123	0.181833	0.190342	NaN	Low
PDC	1.04857	-0.0829285	0.177845	0.641003	NaN	Low
PTGS2	401.161	0.511871	0.130459	8.72284e-05	0.00409709	OK
PLA2G4A	122.054	-0.302268	0.183865	0.100183	0.451076	OK
FAM5C	0	NaN	NaN	NaN	NaN	Low
LOC440704	0	NaN	NaN	NaN	NaN	Low
RGS18	4.48035	0.0194967	0.244002	0.936314	NaN	Low
RGS21	0	NaN	NaN	NaN	NaN	Low
RGS1	0	NaN	NaN	NaN	NaN	Low
RGS13	0	NaN	NaN	NaN	NaN	Low
RGS2	260.755	-0.0673179	0.14764	0.648418	0.890382	OK
UCHL5	365.226	-0.154209	0.182195	NaN	NaN	Outlier
TROVE2	167.555	-0.527709	0.190504	0.00560431	0.0914388	OK
GLRX2	28.8425	-0.117128	0.282616	0.67855	0.901215	OK
CDC73	732.025	-0.0510192	0.119132	0.668463	0.896984	OK
MIR1278	0	NaN	NaN	NaN	NaN	Low
B3GALT2	0	NaN	NaN	NaN	NaN	Low
KCNT2	0	NaN	NaN	NaN	NaN	Low
MIR4735	0	NaN	NaN	NaN	NaN	Low
CFH	1635.27	-0.0868322	0.0940943	0.3561	0.74325	OK
CFHR3	2.46719	0.0950651	0.231392	0.68119	NaN	Low
CFHR1	0	NaN	NaN	NaN	NaN	Low
CFHR4	0	NaN	NaN	NaN	NaN	Low
CFHR2	0	NaN	NaN	NaN	NaN	Low
CFHR5	0	NaN	NaN	NaN	NaN	Low
F13B	0	NaN	NaN	NaN	NaN	Low
ASPM	100.428	-0.44975	0.255569	NaN	NaN	Outlier
ZBTB41	129.771	-0.336443	0.190003	0.0766074	0.404743	OK
CRB1	1.05137	-0.0329572	0.166488	0.84308	NaN	Low
DENND1B	99.0699	0.106438	0.223913	0.634534	0.88754	OK
C1orf53	1.67455	-0.148119	0.174988	0.397298	NaN	Low
LHX9	0	NaN	NaN	NaN	NaN	Low
NEK7	237.399	-0.249714	0.163197	0.125981	0.495455	OK
ATP6V1G3	0	NaN	NaN	NaN	NaN	Low
PTPRC	0.354728	0.0124163	0.0921947	0.892869	NaN	Low
LOC100131234	1.74894	-0.161031	0.212869	0.449362	NaN	Low
MIR181B1	0.154997	0.0363927	0.0641175	0.57031	NaN	Low
MIR181A1	0	NaN	NaN	NaN	NaN	Low
NR5A2	0.722168	0.0718359	0.131956	0.58617	NaN	Low
SMIM16	4.38253	-0.104001	0.259874	0.689012	NaN	Low
ZNF281	530.275	-0.00563669	0.113815	0.960501	0.990325	OK
KIF14	81.1244	-0.0520049	0.227904	0.8195	0.948511	OK
DDX59	197.489	-0.0202444	0.147327	0.890706	0.972697	OK
CAMSAP2	2458.67	-0.0916189	0.104894	0.382423	0.758728	OK
GPR25	0	NaN	NaN	NaN	NaN	Low
C1orf106	758.863	0.333734	0.12442	0.00731125	0.108185	OK
KIF21B	20.6471	0.510926	0.284797	0.0728131	0.392558	OK
CACNA1S	0.131153	-0.0312393	0.0589286	0.596028	NaN	Low
ASCL5	0.227892	0.0456636	0.0717276	0.52437	NaN	Low
TMEM9	1009.74	0.0297859	0.0885131	0.736483	0.926544	OK
IGFN1	29.3677	0.0782644	0.266335	0.768867	0.934518	OK
PKP1	6390.8	-0.134905	0.0567525	0.0174507	0.180776	OK
TNNT2	28.9606	-0.0541106	0.258551	0.834226	0.955113	OK
LAD1	4532.88	0.107086	0.0941197	0.255219	0.658532	OK
TNNI1	1.39369	-0.116983	0.17255	0.497792	NaN	Low
PHLDA3	702.628	-0.0180666	0.146034	0.901541	0.975319	OK
CSRP1	1375.81	0.350862	0.0889923	8.06005e-05	0.00381468	OK
RPS10P7	4.16129	0.139075	0.252648	0.581996	NaN	Low
NAV1	1433.8	0.172948	0.0875234	0.0481528	0.320668	OK
MIR5191	0	NaN	NaN	NaN	NaN	Low
RNU6-79	0	NaN	NaN	NaN	NaN	Low
MIR1231	0	NaN	NaN	NaN	NaN	Low
IPO9	1325.74	0.0676363	0.0788548	0.39104	0.763125	OK
SHISA4	143.694	-0.113054	0.146372	0.439893	0.794305	OK
LMOD1	0	NaN	NaN	NaN	NaN	Low
TIMM17A	1069.22	0.0831923	0.125478	0.50733	0.833562	OK
RNPEP	1689.43	0.0480151	0.0797982	0.547369	0.851847	OK
ELF3	2353.38	0.00504678	0.0999535	0.959731	0.990114	OK
GPR37L1	6.73534	0.398747	0.279601	0.153831	NaN	Low
ARL8A	1572.38	0.125264	0.0847844	0.139557	0.519612	OK
PTPN7	0	NaN	NaN	NaN	NaN	Low
PTPRVP	0	NaN	NaN	NaN	NaN	Low
LGR6	6.66904	-0.0333728	0.276929	0.904079	NaN	Low
UBE2T	89.5461	0.367299	0.195248	0.0599463	0.36172	OK
PPP1R12B	439.029	-0.279543	0.126872	0.0275701	0.235784	OK
SYT2	3.75967	-0.275655	0.250265	0.2707	NaN	Low
KDM5B	2816.91	0.0126928	0.0722373	0.860522	0.963732	OK
KDM5B-AS1	72.5243	-0.101457	0.196842	0.606257	0.876365	OK
LOC641515	1.38611	-0.133464	0.165015	0.418631	NaN	Low
LOC148709	1.90365	-0.103827	0.199656	0.603041	NaN	Low
RABIF	206.306	0.126831	0.167741	0.449582	0.799371	OK
KLHL12	640.973	-0.0862554	0.132477	0.514983	0.838099	OK
ADIPOR1	4397.29	0.0999228	0.081729	0.221477	0.62465	OK
CYB5R1	1571.99	0.179097	0.076335	0.0189662	0.189541	OK
LOC401980	0.223574	0.0450816	0.0712796	0.527085	NaN	Low
TMEM183A	9.48869	-0.0929228	0.250494	NaN	NaN	Low
TMEM183B	0	NaN	NaN	NaN	NaN	Low
PPFIA4	314.852	0.323641	0.124002	0.00905529	0.123633	OK
MYOG	0	NaN	NaN	NaN	NaN	Low
ADORA1	2.77121	-0.0654399	0.235271	0.7809	NaN	Low
MYBPH	0	NaN	NaN	NaN	NaN	Low
CHI3L1	3.43978	-0.0253656	0.252721	0.920051	NaN	Low
CHIT1	0.359045	0.0129244	0.092507	0.888887	NaN	Low
LOC730227	0.670723	0.103536	0.105853	0.328021	NaN	Low
BTG2	2593.98	-0.1079	0.0830326	0.193777	0.59781	OK
FMOD	15.8193	0.0629052	0.278723	0.821442	0.949821	OK
PRELP	0.407693	-0.104964	0.105618	0.320318	NaN	Low
OPTC	0	NaN	NaN	NaN	NaN	Low
ATP2B4	4269.76	-0.119347	0.0813013	0.142116	0.524943	OK
SNORA77	1.49724	-0.00950885	0.183064	0.958574	NaN	Low
LINC00260	7.46609	-0.0553421	0.28186	0.844339	NaN	Low
LAX1	0.483671	-0.0354034	0.120469	0.768851	NaN	Low
ZC3H11A	2190.7	0.0538246	0.0680685	0.429095	0.788652	OK
ZBED6	244.907	0.131009	0.13071	0.316205	0.717074	OK
SNRPE	210.461	0.0449255	0.147862	0.761254	0.932569	OK
LINC00303	0.227892	0.0456636	0.0717276	0.52437	NaN	Low
SOX13	317.32	0.0885056	0.128986	0.492609	0.824521	OK
ETNK2	335.478	-0.0666302	0.12868	0.604599	0.876108	OK
REN	4.21504	0.253181	0.239819	0.291099	NaN	Low
KISS1	0.430016	0.0164614	0.100104	0.869382	NaN	Low
GOLT1A	11.3623	-0.176461	0.286957	0.538594	0.848505	OK
PLEKHA6	192.884	0.145946	0.150859	0.333331	0.731169	OK
LINC00628	0.653304	0.0402334	0.109486	0.713266	NaN	Low
PPP1R15B	715.564	-0.136964	0.08701	0.115461	0.478503	OK
PIK3C2B	252.188	-0.300013	0.132302	0.0233508	0.2148	OK
MDM4	182.928	-0.0624082	0.150608	0.6786	0.901215	OK
LRRN2	1.01801	-0.022933	0.12485	0.85426	NaN	Low
NFASC	111.086	-0.00288108	0.161529	0.985769	0.995936	OK
CNTN2	0	NaN	NaN	NaN	NaN	Low
[truncated: 21,711 more rows]

## Sheet: GSE147507_Biopsies
Gene_name	baseMean	log2FoldChange	lfcSE	pvalue	status
DDX11L1	0	N/A	0	#DIV/0!	Low
WASH7P	200.5	N/A	5.554	0.319759	OK
FAM138A	0	N/A	0	#DIV/0!	Low
FAM138F	0	N/A	0	#DIV/0!	Low
OR4F5	0	N/A	0	#DIV/0!	Low
LOC729737	42.5	3.15213	0.689277	#NUM!	OK
LOC100132287	0	N/A	0	#DIV/0!	Low
LOC100132062	0	N/A	0	#DIV/0!	Low
LOC100133331	16	N/A	0.0117113	0.0110943	OK
OR4F29	0	N/A	0	#DIV/0!	Low
OR4F16	0	N/A	0	#DIV/0!	Low
OR4F3	0	N/A	0	#DIV/0!	Low
LOC100288069	5	N/A	0.0223777	0.0652068	Low
LINC00115	48.5	N/A	0.781787	0.210349	OK
FAM41C	0	N/A	0	#DIV/0!	Low
SAMD11	15	N/A	0.668888	0.431209	OK
NOC2L	1536	N/A	0.125517	0.00123163	OK
KLHL17	116.5	N/A	1.15426	0.157316	OK
PLEKHN1	25.5	N/A	0.506144	0.318365	OK
HES4	306	-0.511483	4.38755	0.510552	OK
ISG15	2739.5	4.09679	24.4741	#NUM!	OK
AGRN	721.5	0.207801	6.50635	#NUM!	OK
RNF223	8	N/A	0.260444	0.5	Low
C1orf159	181	N/A	1.18964	0.0940524	OK
MIR200B	0	N/A	0	#DIV/0!	Low
MIR200A	0	N/A	0	#DIV/0!	Low
MIR429	0.5	N/A	0.0162778	0.5	Low
TTLL10	12	N/A	0.118511	0.137109	OK
TNFRSF18	163	-1.88268	2.52922	0.327919	OK
TNFRSF4	162	0.154542	2.91326	#NUM!	OK
SDF4	2342	-1.36567	20.5449	0.197083	OK
B3GALT6	362	-0.277877	2.84217	0.501928	OK
UBE2J2	1230	-5.02475	7.40275	0.0892499	OK
SCNN1D	33	N/A	1.56413	0.445612	OK
ACAP3	197	N/A	4.74217	0.288882	OK
PUSL1	157	-1.97887	0.25089	0.0326294	OK
TAS1R3	11.5	N/A	0.505099	0.427619	OK
DVL1	493.5	-4.60979	1.80919	0.0590024	OK
MXRA8	593	-3.32826	28.1869	0.47942	OK
AURKAIP1	1887	-2.25887	26.5165	0.23284	OK
CCNL2	5163.5	-8.15114	61.7699	0.163323	OK
LOC148413	324.5	-2.54025	2.72063	0.141797	OK
MRPL20	1818.5	-4.58403	10.0459	0.0832079	OK
ANKRD65	56	N/A	0.398754	0.101399	OK
TMEM88B	0	N/A	0	#DIV/0!	Low
VWA1	629.5	-0.969674	25.6563	0.632141	OK
ATAD3C	59	-0.419522	2.84697	0.817021	OK
ATAD3B	662.5	N/A	8.33455	0.17014	OK
ATAD3A	563.5	N/A	4.59726	0.128734	OK
TMEM240	23	N/A	0.871332	0.392511	OK
SSU72	2603	-0.312025	36.581	0.636697	OK
MIB2	175.5	N/A	3.49798	0.249959	OK
MMP23B	0.5	N/A	0.0300111	0.5	Low
MMP23A	0	N/A	0	#DIV/0!	Low
CDK11B	738	-4.45198	17.634	0.299148	OK
SLC35E2B	318	-1.34438	4.55235	0.299378	OK
CDK11A	306.5	N/A	7.5652	0.294281	OK
NADK	1346	0.689807	16.9112	#NUM!	OK
GNB1	12031.5	0.189149	47.6355	#NUM!	OK
CALML6	3	N/A	0.0411999	0.183611	Low
TMEM52	15	N/A	0.391155	0.306298	OK
GABRD	13	N/A	0.68771	0.471245	OK
PRKCZ	465	N/A	4.02526	0.121559	OK
SKI	853.5	0.443094	2.20902	#NUM!	OK
MORN1	38.5	N/A	1.43136	0.388054	OK
LOC100129534	12.5	N/A	0.0366334	0.0450506	OK
RER1	2898.5	-1.22958	11.644	0.107658	OK
PEX10	106	N/A	3.95533	0.38892	OK
PLCH2	8	N/A	0.260444	0.5	Low
PANK4	657	N/A	7.50233	0.182099	OK
HES5	9.5	N/A	0.124122	0.2091	Low
TNFRSF14	2660.5	-3.74313	3.38666	0.0209258	OK
FAM213B	337.5	-1.80985	1.09389	0.066616	OK
MMEL1	92.5	N/A	1.94674	0.337017	OK
TTC34	0.5	N/A	0.0162778	0.5	Low
ACTRT2	0	N/A	0	#DIV/0!	Low
PRDM16	326.5	-1.9086	4.38039	0.284015	OK
MIR4251	2	N/A	0.065111	0.5	Low
ARHGEF16	30	2.14015	0.180555	#NUM!	OK
MEGF6	316	-0.0616997	7.67252	0.945885	OK
MIR551A	0	N/A	0	#DIV/0!	Low
TPRG1L	1580.5	N/A	15.9425	0.139759	OK
WRAP73	548	-4.70717	4.78698	0.14346	OK
TP73	25	2.04641	0.165844	#NUM!	OK
TP73-AS1	431	N/A	10.872	0.299007	OK
CCDC27	0	N/A	0	#DIV/0!	Low
SMIM1	13	N/A	0.0529112	0.0629808	OK
LRRC47	752.5	N/A	7.76528	0.142662	OK
CEP104	267.5	N/A	0.27143	0.015191	OK
DFFB	104.5	N/A	2.47663	0.285549	OK
C1orf174	343.5	-1.53346	0.21237	0.0143041	OK
AJAP1	66	N/A	1.73207	0.414633	OK
MIR4689	0	N/A	0	#DIV/0!	Low
NPHP4	248.5	-2.69166	0.843696	0.0589964	OK
KCNAB2	550	N/A	7.96992	0.192265	OK
CHD5	23	N/A	0.917621	0.4048	OK
RPL22	7507.5	-0.899868	108.033	0.374518	OK
RNF207	73	N/A	1.23398	0.218807	OK
ICMT	614	-1.59127	13.9406	0.386328	OK
HES3	0	N/A	0	#DIV/0!	Low
GPR153	142	N/A	4.82004	0.366578	OK
ACOT7	540.5	-2.01954	13.9727	0.383596	OK
HES2	39	N/A	0.304155	0.110381	OK
ESPN	2.5	N/A	0.0111888	0.0652068	Low
MIR4252	0	N/A	0	#DIV/0!	Low
TNFRSF25	303	N/A	0.467691	0.0235221	OK
PLEKHG5	181	N/A	1.18964	0.0940524	OK
NOL9	443.5	-0.954281	2.04045	0.136748	OK
TAS1R1	3.5	N/A	0.1175	0.363989	Low
ZBTB48	470	-2.38624	6.36208	0.221145	OK
KLHL21	1626.5	-4.65593	19.531	0.199185	OK
PHF13	1114	-5.65309	17.5199	0.257099	OK
THAP3	563.5	-2.44926	3.67148	0.124445	OK
DNAJC11	342.5	N/A	1.42961	0.0646269	OK
CAMTA1	2542.5	0.169124	22.8747	#NUM!	OK
VAMP3	4060.5	-1.63369	65.6005	0.298776	OK
PER3	686.5	N/A	4.85219	0.111022	OK
UTS2	18.5	N/A	0.740099	0.405447	OK
TNFRSF9	219	N/A	5.09295	0.37073	OK
PARK7	4255	-1.68403	15.7569	0.0786199	OK
ERRFI1	13549	-5.57812	321.67	0.384275	OK
SLC45A1	42.5	N/A	2.04176	0.448783	OK
RERE	2223	-1.67079	31.5938	0.267212	OK
ENO1	59786.5	-2.49195	1209.51	0.379934	OK
ENO1-AS1	2.5	N/A	0.0574777	0.279114	Low
CA6	2	N/A	0.065111	0.5	Low
SLC2A7	0	N/A	0	#DIV/0!	Low
SLC2A5	98.5	N/A	0.336812	0.0527159	OK
GPR157	11	N/A	0.358111	0.5	OK
MIR34A	5.5	N/A	0.179055	0.5	Low
H6PD	1082.5	-1.63073	28.1743	0.417653	OK
SPSB1	3048.5	-1.52043	40.4542	0.26463	OK
SLC25A33	685.5	N/A	0.596159	0.0130337	OK
TMEM201	234.5	N/A	2.87329	0.166245	OK
PIK3CD	1003.5	-1.04777	15.3574	0.424403	OK
CLSTN1	1330	-2.0773	23.5885	0.289838	OK
CTNNBIP1	454.5	N/A	14.6895	0.355112	OK
LZIC	242	-1.26769	0.703668	0.0761981	OK
NMNAT1	53	N/A	0.496421	0.130662	OK
RBP7	236.5	-1.47943	13.2232	0.622214	OK
UBE4B	731.5	-1.37269	4.74584	0.149625	OK
KIF1B	1217.5	-0.683885	2.30133	0.0741813	OK
PGD	3522	0.0239203	18.889	#NUM!	OK
CORT	2.5	N/A	0.0813888	0.5	Low
DFFA	420	-2.42327	0.352195	0.0154498	OK
PEX14	234	-0.285469	0.852863	0.27914	OK
CASZ1	434	-1.77493	4.22329	0.214103	OK
C1orf127	1	N/A	0.0325555	0.5	Low
TARDBP	4945.5	-2.76941	54.1687	0.202587	OK
MASP2	70	0.79059	1.37793	#NUM!	OK
SRM	1412.5	-0.132823	4.84046	0.466962	OK
EXOSC10	1252.5	-1.57348	5.2353	0.0915861	OK
MTOR	1074	-1.90657	5.75638	0.113332	OK
MTOR-AS1	1.5	N/A	0.0488333	0.5	Low
ANGPTL7	5	N/A	0.0223777	0.0652068	Low
UBIAD1	627	N/A	3.51689	0.0875047	OK
FBXO2	47	-0.388062	0.645465	0.572421	OK
FBXO44	285	N/A	2.98822	0.144722	OK
FBXO6	284	0.337341	1.72468	#NUM!	OK
MAD2L2	1412.5	-1.6312	1.36225	0.0216157	OK
DRAXIN	0.5	N/A	0.0162778	0.5	Low
AGTRAP	1123	-2.10726	9.2198	0.149619	OK
MTHFR	897.5	-5.6973	17.672	0.251939	OK
CLCN6	612	N/A	2.56567	0.0649156	OK
NPPA-AS1	13	N/A	0.145489	0.178364	OK
NPPA	16	N/A	0.0580001	0.0559521	OK
NPPB	0.5	N/A	0.0162778	0.5	Low
KIAA2013	632	-1.9448	7.15192	0.206046	OK
PLOD1	2396.5	-2.18184	2.24552	0.0180019	OK
MFN2	3132.5	N/A	9.9117	0.0487075	OK
MIIP	309	-4.12557	4.93792	0.220558	OK
TNFRSF8	61	N/A	0.467421	0.108587	OK
TNFRSF1B	4753	-2.52997	29.0159	0.115064	OK
MIR4632	0	N/A	0	#DIV/0!	Low
VPS13D	1639	-5.32584	8.45834	0.0823576	OK
SNORA59B	0	N/A	0	#DIV/0!	Low
SNORA59A	0	N/A	0	#DIV/0!	Low
DHRS3	1989.5	-1.16851	18.573	0.256565	OK
AADACL4	0	N/A	0	#DIV/0!	Low
AADACL3	0	N/A	0	#DIV/0!	Low
C1orf158	12.5	2.03043	0.406944	#NUM!	OK
PRAMEF12	0	N/A	0	#DIV/0!	Low
PRAMEF1	0.5	N/A	0.0162778	0.5	Low
PRAMEF11	0	N/A	0	#DIV/0!	Low
HNRNPCL1	7	N/A	0.420155	0.5	Low
PRAMEF2	0	N/A	0	#DIV/0!	Low
PRAMEF4	0	N/A	0	#DIV/0!	Low
PRAMEF10	0	N/A	0	#DIV/0!	Low
PRAMEF8	0	N/A	0	#DIV/0!	Low
PRAMEF7	0	N/A	0	#DIV/0!	Low
PRAMEF6	0	N/A	0	#DIV/0!	Low
PRAMEF22	0	N/A	0	#DIV/0!	Low
PRAMEF5	0	N/A	0	#DIV/0!	Low
PRAMEF9	0	N/A	0	#DIV/0!	Low
PRAMEF15	0	N/A	0	#DIV/0!	Low
PRAMEF14	0	N/A	0	#DIV/0!	Low
PRAMEF13	0	N/A	0	#DIV/0!	Low
PRAMEF19	0	N/A	0	#DIV/0!	Low
PRAMEF18	0	N/A	0	#DIV/0!	Low
PRAMEF20	0	N/A	0	#DIV/0!	Low
PRAMEF17	1	N/A	0.0600221	0.5	Low
LRRC38	14.5	N/A	0.472055	0.5	OK
PDPN	2159.5	0.0739715	30.449	#NUM!	OK
PRDM2	1697	N/A	19.6043	0.184286	OK
KAZN	872.5	-4.60763	12.4683	0.197614	OK
TMEM51-AS1	44.5	N/A	0.2915	0.102655	OK
TMEM51	2056.5	-4.87058	46.7222	0.372768	OK
FHAD1	46	N/A	0.770598	0.217185	OK
EFHD2	2299.5	1.16481	0.219053	#NUM!	OK
CTRC	16.5	N/A	0.110877	0.0960343	OK
CELA2A	3	N/A	0.0874887	0.331406	Low
CELA2B	10	N/A	0.00153344	0.00231501	OK
CASP9	405	-4.5684	8.8485	0.278872	OK
DNAJC16	270.5	1.11175	0.405208	#NUM!	OK
AGMAT	6	N/A	0.0823998	0.183611	Low
DDI2	46.5	N/A	0.912077	0.314687	OK
RSC1A1	67.5	0.860529	0.345945	#NUM!	OK
PLEKHM2	2279.5	-6.80237	11.6278	0.0800837	OK
SLC25A34	94	N/A	0.0514454	0.00828491	OK
TMEM82	0	N/A	0	#DIV/0!	Low
FBLIM1	907	-1.61068	33.5175	0.510408	OK
UQCRHL	145	-1.29879	0.0471984	0.00825123	OK
FLJ37453	131	-2.91509	2.4934	0.273663	OK
SPEN	2676	-1.66391	16.7596	0.141953	OK
ZBTB17	1385.5	-6.2028	9.23741	0.0966184	OK
HSPB7	387.5	N/A	14.2785	0.385939	OK
CLCNKA	10.5	N/A	0.583944	0.482739	OK
CLCNKB	7	N/A	0.327577	0.442606	Low
FAM131C	0	N/A	0	#DIV/0!	Low
EPHA2	3797	-3.42449	89.0356	0.402842	OK
ARHGEF19	236.5	-1.80267	5.44665	0.370601	OK
FBXO42	686.5	-1.82598	8.27756	0.261037	OK
SZRD1	4101.5	-1.29637	8.20991	0.0501079	OK
SPATA21	6	N/A	0.036111	0.0865425	Low
NECAP2	3033.5	-2.04018	16.7797	0.113456	OK
CROCCP3	70.5	N/A	0.759898	0.148358	OK
MIR3675	0	N/A	0	#DIV/0!	Low
NBPF1	153	N/A	0.897686	0.0844782	OK
CROCCP2	421.5	-0.981544	6.41349	0.37127	OK
MST1P2	21.5	N/A	0.31841	0.195863	OK
ESPNP	0.5	N/A	0.0162778	0.5	Low
MST1L	16.5	N/A	0.352011	0.341467	OK
CROCC	212.5	N/A	6.27427	0.334231	OK
MFAP2	94.5	N/A	2.61703	0.319699	OK
ATP13A2	513	-2.99447	6.00826	0.211896	OK
SDHB	1951.5	-2.46638	1.04081	0.00978253	OK
PADI2	127	4.22481	1.55897	#NUM!	OK
PADI1	9	N/A	0.293	0.5	Low
PADI3	4	N/A	0.240089	0.5	Low
PADI4	105.5	1.82848	5.49914	#NUM!	OK
PADI6	0	N/A	0	#DIV/0!	Low
RCC2	2514.5	-3.07969	2.47552	0.0169519	OK
ARHGEF10L	417	N/A	1.97739	0.0689346	OK
ACTL8	0	N/A	0	#DIV/0!	Low
IGSF21	22.5	N/A	1.21163	0.475348	OK
KLHDC7A	11	N/A	0.104778	0.132679	OK
PAX7	0	N/A	0	#DIV/0!	Low
TAS1R2	0.5	N/A	0.0162778	0.5	Low
ALDH4A1	190.5	N/A	7.54595	0.403096	OK
MIR4695	0	N/A	0	#DIV/0!	Low
IFFO2	618.5	-2.35598	1.94408	0.0600606	OK
UBR4	6884	-2.33133	133.479	0.373003	OK
EMC1	997.5	-1.43835	5.2563	0.128985	OK
MRTO4	1933.5	-2.04915	8.41786	0.0887292	OK
AKR7L	19	N/A	0.862688	0.435479	OK
AKR7A3	20	N/A	0.552399	0.319102	OK
LOC100506730	32.5	N/A	0.978654	0.338739	OK
AKR7A2	659	-3.04984	22.2426	0.403508	OK
PQLC2	222.5	-3.59115	2.10674	0.143515	OK
CAPZB	5978.5	0.803115	71.0184	#NUM!	OK
MINOS1	1500	0.513029	8.426	#NUM!	OK
NBL1	22.5	N/A	0.933899	0.414199	OK
HTR6	1.5	N/A	0.0488333	0.5	Low
TMCO4	204.5	N/A	3.47965	0.219998	OK
RNF186	1	N/A	0.0325555	0.5	Low
OTUD3	1286.5	N/A	30.4493	0.376918	OK
PLA2G2E	0	N/A	0	#DIV/0!	Low
PLA2G2A	948.5	-1.92195	56.1441	0.593049	OK
PLA2G5	103.5	-1.23143	5.00878	0.623706	OK
PLA2G2D	19.5	N/A	0.383522	0.247338	OK
PLA2G2F	0	N/A	0	#DIV/0!	Low
PLA2G2C	1	N/A	0.0600221	0.5	Low
UBXN10	52.5	N/A	1.57734	0.338221	OK
VWA5B1	5	N/A	0.300111	0.5	Low
CAMK2N1	877.5	0.254668	23.0909	#NUM!	OK
MUL1	1013.5	-5.60138	8.18421	0.129985	OK
FAM43B	5	2.46977	0.300111	#NUM!	Low
CDA	149.5	4.32194	7.44578	#NUM!	OK
PINK1	1192	-4.62213	37.3852	0.359962	OK
DDOST	3375	-1.7254	1.54232	0.00984681	OK
KIF17	490.5	-3.57109	3.19277	0.111175	OK
SH2D5	361.5	N/A	11.7225	0.498374	OK
HP1BP3	3584	-1.41742	8.54829	0.0583105	OK
EIF4G3	936	0.615294	5.15198	#NUM!	OK
ECE1	7397	-2.49919	40.484	0.0958281	OK
LOC100506801	30	N/A	0.189756	0.0990193	OK
NBPF3	74.5	N/A	0.851566	0.182285	OK
ALPL	1168	2.33493	43.1658	#NUM!	OK
RAP1GAP	109.5	-0.0186587	1.38925	0.97522	OK
USP48	898	-3.48017	2.71136	0.0509905	OK
LDLRAD2	18.5	N/A	0.462366	0.296992	OK
HSPG2	756.5	-3.18726	5.55726	0.129407	OK
CELA3B	0	N/A	0	#DIV/0!	Low
CELA3A	0	N/A	0	#DIV/0!	Low
LINC00339	209	-2.02972	4.58295	0.342193	OK
CDC42	8369	0.492041	19.4424	#NUM!	OK
WNT4	43.5	N/A	0.0737893	0.0258758	OK
ZBTB40	971	-2.21943	7.68009	0.15754	OK
EPHA8	0	N/A	0	#DIV/0!	Low
C1QA	4621	-0.705064	118.962	0.5909	OK
C1QC	1282	2.58661	19.5502	#NUM!	OK
C1QB	3894	1.17862	68.5214	#NUM!	OK
EPHB2	674.5	-1.08822	18.5333	0.630126	OK
MIR4684	0	N/A	0	#DIV/0!	Low
MIR4253	0	N/A	0	#DIV/0!	Low
KDM1A	1771.5	-4.84907	9.80946	0.0894191	OK
MIR3115	0	N/A	0	#DIV/0!	Low
LUZP1	2442	-4.78199	39.1367	0.265999	OK
HTR1D	16.5	N/A	0.897788	0.477732	OK
HNRNPR	3398.5	-1.45435	7.81316	0.0535972	OK
ZNF436	451.5	-0.791345	8.49188	0.477632	OK
TCEA3	390	N/A	13.7343	0.375235	OK
ASAP3	327	N/A	10.7861	0.359864	OK
E2F2	17.5	N/A	0.448633	0.302546	OK
ID3	5175	-3.06319	36.4458	0.113727	OK
MDS2	2.5	N/A	0.0813888	0.5	Low
RPL11	31825.5	-0.964814	278.461	0.24246	OK
PITHD1	1673	-2.32784	1.0812	0.0121137	OK
LYPLA2	1430.5	-2.02238	1.33826	0.0185875	OK
GALE	618.5	-1.11068	9.35029	0.408144	OK
HMGCL	741	-4.2719	2.81646	0.0587091	OK
FUCA1	388.5	-0.112295	8.32102	0.892917	OK
CNR2	5	N/A	0.162778	0.5	Low
MIR378F	0	N/A	0	#DIV/0!	Low
PNRC2	904.5	N/A	12.5048	0.221532	OK
SRSF10	585	N/A	6.1304	0.166683	OK
MYOM3	19	1.8657	1.14042	#NUM!	OK
IL22RA1	12.5	N/A	0.379966	0.340904	OK
IFNLR1	102	N/A	2.71891	0.420528	OK
LOC284632	4	N/A	0.240089	0.5	Low
GRHL3	6	N/A	0.036111	0.0865425	Low
STPG1	176	-0.273317	2.04675	0.620833	OK
NIPAL3	404	N/A	6.10372	0.199205	OK
RCAN3AS	0.5	N/A	0.0162778	0.5	Low
RCAN3	126.5	-0.113452	0.186587	0.27304	OK
NCMAP	37.5	-1.03347	0.399277	0.273842	OK
SRRM1	2369.5	-1.45128	7.70707	0.0787366	OK
CLIC4	11960	0.442106	91.1251	#NUM!	OK
RUNX3	641	-3.36012	4.89844	0.132958	OK
SYF2	1518	-1.49295	12.7003	0.179888	OK
RHD	28	N/A	0.245666	0.123073	OK
TMEM50A	3246	1.11324	18.93	#NUM!	OK
RHCE	5.5	N/A	0.0401889	0.114897	Low
LDLRAP1	623	N/A	6.47285	0.14354	OK
MAN1C1	148	1.46553	5.31904	#NUM!	OK
MTFR1L	836	N/A	13.1474	0.206053	OK
LOC646471	51	N/A	0.191221	0.0549553	OK
AUNIP	6.5	N/A	0.119033	0.294089	Low
PAQR7	248	-2.70966	1.36915	0.0939223	OK
STMN1	1036.5	-2.32888	7.36068	0.125693	OK
MIR3917	0	N/A	0	#DIV/0!	Low
PAFAH2	177	-0.325061	2.89368	0.665039	OK
EXTL1	7	N/A	0.142422	0.254042	Low
SLC30A2	8.5	N/A	0.0472998	0.0803316	Low
TRIM63	5	N/A	0.0223777	0.0652068	Low
PDIK1L	103.5	N/A	0.360723	0.0537514	OK
FAM110D	588	N/A	32.0991	0.478486	OK
ZNF593	1284	-4.05375	3.42289	0.0419305	OK
CNKSR1	165.5	1.01164	1.31452	#NUM!	OK
CATSPER4	0.5	N/A	0.0162778	0.5	Low
CEP85	147.5	N/A	0.45079	0.0470156	OK
SH3BGRL3	11244.5	1.88601	20.7189	#NUM!	OK
UBXN11	450.5	-2.33025	6.34886	0.230714	OK
CD52	1940	-0.26375	70.4318	0.847735	OK
ZNF683	20	N/A	0.783843	0.400569	OK
LIN28A	1.5	N/A	0.0900332	0.5	Low
DHDDS	616.5	N/A	2.89732	0.0729732	OK
HMGN2	2603.5	-2.77196	69.7075	0.35578	OK
RPS6KA1	1774.5	-0.609325	4.58391	0.113941	OK
MIR1976	0	N/A	0	#DIV/0!	Low
ARID1A	1513.5	-1.27947	4.51149	0.0776912	OK
PIGV	213.5	0.822893	0.285013	#NUM!	OK
ZDHHC18	940.5	-1.16669	1.73424	0.0506955	OK
SFN	4078	-7.38699	111.283	0.43135	OK
GPN2	414	N/A	0.454951	0.0164417	OK
GPATCH3	403	N/A	5.44194	0.180955	OK
NR0B2	228.5	-3.18815	6.97605	0.510718	OK
NUDC	4613	-2.1901	17.0982	0.0731743	OK
TRNP1	234.5	-2.46828	2.35734	0.192969	OK
SLC9A1	1052	N/A	12.3538	0.187416	OK
WDTC1	703.5	-1.35455	7.37008	0.230959	OK
TMEM222	1184.5	-2.96195	6.1067	0.0855582	OK
SYTL1	116.5	-1.5447	0.228479	0.0455518	OK
MAP3K6	2729	N/A	148.386	0.477573	OK
FCN3	8624.5	-2.82737	463.179	0.523017	OK
CD164L2	9	N/A	0.154133	0.275102	Low
GPR3	216	N/A	6.57692	0.341293	OK
WASF2	3700	-1.93342	40.7223	0.201672	OK
AHDC1	369.5	-4.38189	5.83822	0.216515	OK
FGR	2704.5	3.55642	56.4673	#NUM!	OK
IFI6	2761	6.31819	5.45498	#NUM!	OK
FAM76A	204.5	-0.415934	4.54429	0.67982	OK
STX12	3785	0.619187	27.8214	#NUM!	OK
PPP1R8	1121.5	-1.67526	1.49211	0.0289197	OK
SCARNA1	2	5.25925	0.065111	#NUM!	Low
THEMIS2	919.5	-0.252665	9.36441	0.60543	OK
RPA2	1044	-0.0129456	1.28412	0.809072	OK
SMPDL3B	72.5	N/A	1.06419	0.235464	OK
XKR8	154	N/A	2.02235	0.176631	OK
EYA3	788	0.521587	4.77749	#NUM!	OK
PTAFR	767.5	0.46734	11.9329	#NUM!	OK
DNAJC8	3346.5	-0.768601	17.9432	0.196915	OK
SESN2	835.5	N/A	11.5082	0.220698	OK
MED18	15	3.54847	0.0208443	#NUM!	OK
PHACTR4	264	-0.595007	0.524241	0.0868478	OK
SNHG3	1628	-4.26885	15.599	0.159955	OK
RCC1	664	-1.18179	11.8499	0.453787	OK
TRNAU1AP	783.5	-4.23361	6.06594	0.128627	OK
SNHG12	1747	-3.66054	35.9982	0.353227	OK
SNORD99	61	N/A	1.25433	0.256161	OK
SNORA61	95.5	0.388714	0.748322	#NUM!	OK
SNORA44	46	0.459584	0.432911	#NUM!	OK
SNORA16A	48	-1.07808	0.914622	0.496859	OK
RAB42	21	N/A	0.1282	0.0954688	OK
TAF12	560	-0.258331	0.747326	0.120168	OK
RNU11	23.5	3.40207	0.1633	#NUM!	OK
GMEB1	230	N/A	3.09033	0.215171	OK
YTHDF2	1989	-1.67529	3.33793	0.0363753	OK
OPRD1	0	N/A	0	#DIV/0!	Low
EPB41	585.5	-1.05244	7.76678	0.375449	OK
TMEM200B	30.5	N/A	0.951187	0.34682	OK
SRSF4	5778	-0.986554	17.1612	0.0917165	OK
MECR	323.5	-2.19667	5.34536	0.268423	OK
PTPRU	263.5	-1.80097	1.55887	0.118735	OK
MATN1	18	N/A	0.1694	0.149186	OK
MATN1-AS1	44.5	N/A	0.198922	0.0693243	OK
LAPTM5	8303	0.279906	78.5704	#NUM!	OK
MIR4420	0	N/A	0	#DIV/0!	Low
SDC3	1088.5	N/A	14.9718	0.183856	OK
PUM1	2124.5	-0.0242562	23.0605	0.961916	OK
SNORD103B	0	N/A	0	#DIV/0!	Low
SNORD103A	0	N/A	0	#DIV/0!	Low
NKAIN1	0	N/A	0	#DIV/0!	Low
SNRNP40	1030	-1.43543	10.1563	0.241253	OK
ZCCHC17	813.5	-2.83061	3.83526	0.0796558	OK
FABP3	474.5	-3.10731	4.91949	0.16132	OK
SERINC2	704	-1.9546	13.291	0.386629	OK
TINAGL1	2010	-3.56811	79.54	0.429926	OK
HCRTR1	3.5	N/A	0.113944	0.5	Low
PEF1	2684	-1.80612	10.0127	0.0764068	OK
COL16A1	601.5	N/A	1.01638	0.0251703	OK
MIR4254	0	N/A	0	#DIV/0!	Low
SPOCD1	191	N/A	0.756023	0.0612116	OK
PTP4A2	7060	-0.761626	73.5246	0.366465	OK
KHDRBS1	3707.5	0.140309	3.77106	#NUM!	OK
TMEM39B	500.5	N/A	6.85037	0.183077	OK
KPNA6	1879	-0.577996	3.86626	0.0946757	OK
TXLNA	2909.5	-3.06128	6.97626	0.0403464	OK
CCDC28B	136.5	N/A	1.20341	0.123619	OK
IQCC	62	N/A	0.398333	0.100625	OK
DCDC2B	79	N/A	0.853487	0.148665	OK
TMEM234	153.5	N/A	1.52945	0.138214	OK
EIF3I	7381.5	-1.87729	93.0175	0.2692	OK
MTMR9LP	598	N/A	24.7839	0.413844	OK
FAM167B	359	N/A	9.74429	0.315197	OK
LCK	434.5	N/A	9.8868	0.363173	OK
HDAC1	2497.5	-0.880629	0.577517	0.00762011	OK
MARCKSL1	1943	0.0537251	15.0653	#NUM!	OK
FAM229A	56.5	N/A	0.706498	0.169238	OK
TSSK3	64	-1.84015	0.92522	0.259251	OK
BSDC1	1540.5	-4.2987	1.36768	0.0140159	OK
ZBTB8B	1	N/A	0.0600221	0.5	Low
ZBTB8A	143	N/A	4.41717	0.344607	OK
ZBTB8OS	597	1.44263	0.607415	#NUM!	OK
RBBP4	1553.5	-1.81863	13.4977	0.189008	OK
SYNC	38.5	N/A	2.07941	0.476032	OK
KIAA1522	731	-2.5323	6.7638	0.175823	OK
YARS	3849.5	-2.55831	52.649	0.259463	OK
S100PBP	485.5	-4.60199	1.03957	0.0341598	OK
FNDC5	20	N/A	0.92271	0.43925	OK
HPCA	2	N/A	0.0737554	0.386131	Low
TMEM54	360	-4.39269	7.62874	0.273816	OK
RNF19B	2040	3.40639	29.984	#NUM!	OK
AK2	5250	-0.710876	72.8768	0.479159	OK
TRIM62	119.5	-0.318056	0.460765	0.268918	OK
ZNF362	294.5	-1.68674	12.2144	0.531306	OK
PHC2	5876	-4.55539	20.3363	0.0530932	OK
MIR3605	6	N/A	0.036111	0.0865425	Low
ZSCAN20	53	N/A	0.151623	0.043958	OK
CSMD2	16.5	N/A	0.120567	0.114897	OK
HMGB4	1	N/A	0.0325555	0.5	Low
C1orf94	0.5	N/A	0.0300111	0.5	Low
GJB5	10	N/A	0.1404	0.225045	OK
GJB4	10	N/A	0.279266	0.438418	OK
GJB3	54	N/A	1.758	0.5	OK
GJA4	2262	-5.40283	33.7495	0.201565	OK
SMIM12	1602.5	-1.40381	1.80255	0.0270388	OK
DLGAP3	7.5	N/A	0.0590111	0.12401	Low
LOC653160	74.5	N/A	2.15721	0.329783	OK
ZMYM6	340	N/A	1.07049	0.0484621	OK
ZMYM1	84.5	N/A	0.72072	0.119913	OK
SFPQ	4641.5	-0.648344	23.6733	0.212164	OK
ZMYM4	895	0.296689	6.45567	#NUM!	OK
KIAA0319L	794	0.014142	9.09898	#NUM!	OK
NCDN	265.5	N/A	1.86407	0.10007	OK
TFAP2E	56.5	N/A	0.0121661	0.00324236	OK
PSMB2	2919.5	1.16709	32.3708	#NUM!	OK
C1orf216	513.5	N/A	9.1119	0.227696	OK
CLSPN	35.5	N/A	0.973565	0.317507	OK
AGO4	791	-1.0901	6.74334	0.219599	OK
AGO1	551.5	N/A	6.85644	0.168383	OK
AGO3	415.5	-2.15458	9.22196	0.43086	OK
TEKT2	59.5	N/A	1.05757	0.285496	OK
ADPRHL2	1227	-1.73519	16.0143	0.288275	OK
COL8A2	81.5	N/A	0.67952	0.117427	OK
TRAPPC3	1906	-1.86015	6.73568	0.0750778	OK
MAP7D1	2550	-2.64652	47.0502	0.342941	OK
THRAP3	2768.5	-1.19542	8.93936	0.0878837	OK
SH3D21	312.5	N/A	9.01638	0.451191	OK
EVA1B	563	-2.96361	7.31525	0.199189	OK
STK40	3861	-3.84863	24.6484	0.107287	OK
LSM10	789.5	0.081376	9.47692	#NUM!	OK
OSCP1	88.5	N/A	0.0575453	0.00985012	OK
MRPS15	1176	-0.290242	3.9764	0.25817	OK
CSF3R	482	3.72351	11.8038	#NUM!	OK
GRIK3	3	N/A	0.180066	0.5	Low
MIR4255	0	N/A	0	#DIV/0!	Low
ZC3H12A	4432.5	1.89173	81.0255	#NUM!	OK
MEAF6	1185	-1.11888	7.8494	0.172554	OK
MIR5581	0.5	N/A	0.0162778	0.5	Low
SNIP1	665	-1.95348	7.80906	0.247013	OK
DNALI1	338.5	-1.36646	2.40372	0.162966	OK
GNL2	2721.5	-4.15701	37.3581	0.231892	OK
RSPO1	59.5	N/A	2.13636	0.37981	OK
C1orf109	399.5	-3.26417	3.00754	0.131881	OK
CDCA8	13	N/A	0.0396665	0.0449741	OK
EPHA10	9.5	0.689914	0.385055	#NUM!	Low
MANEAL	59.5	N/A	0.608832	0.141578	OK
YRDC	1003	-3.22599	11.6381	0.205835	OK
C1orf122	1068	-0.174488	9.29767	0.66246	OK
MTF1	846.5	1.17898	7.83921	#NUM!	OK
INPP5B	373	N/A	3.87272	0.14345	OK
SF3A3	2148	-2.88869	5.6141	0.0446729	OK
FHL3	495	1.65371	2.5857	#NUM!	OK
POU3F1	6	N/A	0.0101778	0.0258758	Low
MIR3659	0	N/A	0	#DIV/0!	Low
RRAGC	1637	-2.19869	14.2719	0.174557	OK
GJA9-MYCBP	3.5	N/A	0.113944	0.5	Low
MYCBP	0.5	N/A	0.0162778	0.5	Low
GJA9	0	N/A	0	#DIV/0!	Low
RHBDL2	28	N/A	0.217222	0.122218	OK
AKIRIN1	2299	-1.4524	5.08788	0.053299	OK
NDUFS5	4214	-1.94259	25.0534	0.115055	OK
MACF1	11157	-2.01495	183.344	0.336878	OK
KIAA0754	75.5	N/A	1.25443	0.266876	OK
BMP8A	87	N/A	3.23151	0.387833	OK
PPIEL	61.5	N/A	1.23805	0.251929	OK
PABPC4	3899.5	-0.6306	26.4046	0.259828	OK
SNORA55	1.5	N/A	0.0488333	0.5	Low
HEYL	1044.5	-4.55556	49.0379	0.457032	OK
NT5C1A	0	N/A	0	#DIV/0!	Low
HPCAL4	31.5	N/A	1.15008	0.383761	OK
PPIE	1027.5	-3.7466	4.22831	0.0649436	OK
BMP8B	17.5	N/A	0.494921	0.324435	OK
OXCT2	5.5	N/A	0.237544	0.423636	Low
TRIT1	584	N/A	6.93104	0.189468	OK
MFSD2A	1891	-2.72546	46.7038	0.442555	OK
CAP1	9277	0.721411	40.4394	#NUM!	OK
PPT1	1551	-0.265839	21.8558	0.677896	OK
RLF	2091.5	-2.66626	48.6023	0.422092	OK
TMCO2	3	N/A	0.0411999	0.183611	Low
ZMPSTE24	768.5	0.737217	3.26355	#NUM!	OK
COL9A2	51.5	1.94362	0.684121	#NUM!	OK
SMAP2	1942	1.85104	42.8712	#NUM!	OK
ZFP69B	22	N/A	0.3922	0.286344	OK
ZFP69	71.5	N/A	2.53261	0.376604	OK
EXO5	168	-0.0613498	0.516423	0.675308	OK
ZNF684	71	0.279647	1.43795	#NUM!	OK
RIMS3	456.5	N/A	19.9013	0.425852	OK
NFYC	1207.5	-1.40296	6.00597	0.115273	OK
MIR30E	0	N/A	0	#DIV/0!	Low
MIR30C1	0	N/A	0	#DIV/0!	Low
KCNQ4	119.5	N/A	4.39532	0.385508	OK
CITED4	248.5	0.118434	4.38694	#NUM!	OK
CTPS1	1370.5	-5.97903	18.279	0.216736	OK
SLFNL1-AS1	25.5	N/A	0.182122	0.112222	OK
SLFNL1	11	N/A	0.126667	0.183675	OK
SCMH1	1054	-1.76585	7.0494	0.147241	OK
EDN2	37.5	N/A	0.989388	0.416642	OK
HIVEP3	1021	-0.379607	21.343	0.758551	OK
GUCA2B	0	N/A	0	#DIV/0!	Low
GUCA2A	3	N/A	0.0976666	0.5	Low
FOXJ3	1726.5	-2.15931	20.3796	0.238312	OK
RIMKLA	123	-0.134244	0.948575	0.698383	OK
ZMYND12	22.5	3.19454	0.47101	#NUM!	OK
PPCS	819.5	-1.67078	17.2026	0.358698	OK
CCDC30	33.5	N/A	0.211122	0.0986481	OK
PPIH	467.5	-3.71823	7.23037	0.218647	OK
YBX1	15685.5	-1.91999	111.287	0.136392	OK
CLDN19	1.5	N/A	0.0437444	0.331406	Low
C1orf50	216	0.234004	0.235353	#NUM!	OK
ERMAP	232.5	N/A	3.95676	0.220029	OK
ZNF691	180.5	N/A	1.43736	0.112539	OK
SLC2A1	3938	-2.06848	102.004	0.495187	OK
SLC2A1-AS1	12	N/A	0.303666	0.299703	OK
FAM183A	35	2.24752	0.259956	#NUM!	OK
EBNA1BP2	2834	-4.18979	45.3255	0.270037	OK
TMEM125	496	N/A	6.71914	0.181454	OK
C1orf210	44.5	0.566457	1.23603	#NUM!	OK
TIE1	2337.5	-1.48358	35.6427	0.299156	OK
MPL	16.5	N/A	0.573766	0.372256	OK
CDC20	30.5	N/A	0.437478	0.230001	OK
ELOVL1	2067.5	-2.81208	18.7053	0.166026	OK
MED8	1054	-1.75412	8.20662	0.172231	OK
SZT2	720	-2.65905	3.73157	0.0890129	OK
HYI	0	N/A	0	#DIV/0!	Low
PTPRF	1209	-2.01165	13.8545	0.238165	OK
KDM4A	450.5	-2.00325	3.2938	0.137544	OK
KDM4A-AS1	8	N/A	0.0635776	0.112329	Low
ST3GAL3	452	N/A	4.12446	0.127581	OK
ARTN	42.5	N/A	1.76403	0.414199	OK
IPO13	456.5	-2.02998	3.70022	0.150294	OK
DPH2	1006	-3.29129	5.99591	0.103562	OK
ATP6V0B	3938.5	-1.36407	26.7085	0.171346	OK
B4GALT2	594.5	N/A	2.49407	0.0612651	OK
CCDC24	59.5	N/A	1.1643	0.246342	OK
SLC6A9	184	-2.05046	8.63705	0.530924	OK
KLF17	38.5	N/A	2.07941	0.476032	OK
DMAP1	635	N/A	18.395	0.329883	OK
ERI3	816	-1.86455	16.5296	0.334155	OK
RNF220	1190.5	-1.96642	16.743	0.246313	OK
MIR5584	0	N/A	0	#DIV/0!	Low
TMEM53	133.5	-2.96761	2.92118	0.302813	OK
KIF2C	53	0.16784	0.0590449	#NUM!	OK
RPS8	36016.5	-1.43263	207.241	0.130616	OK
SNORD55	47	N/A	0.141445	0.0462836	OK
SNORD46	5.5	N/A	0.179055	0.5	Low
SNORD38A	25	N/A	0.759932	0.340904	OK
SNORD38B	113	N/A	1.92217	0.219945	OK
BEST4	15.5	N/A	0.0508553	0.0482715	OK
PLK3	1807	-2.60316	1.75371	0.0176349	OK
TCTEX1D4	14.5	N/A	0.379477	0.413592	OK
BTBD19	41.5	N/A	0.749299	0.289987	OK
PTCH2	35.5	1.48449	0.0447892	#NUM!	OK
EIF2B3	441.5	-0.403051	0.161428	0.0225549	OK
HECTD3	672.5	0.890734	5.55569	#NUM!	OK
UROD	1184	-5.09964	23.6664	0.257266	OK
ZSWIM5	114.5	N/A	0.253232	0.0328133	OK
HPDL	16	N/A	0.358599	0.273773	OK
MUTYH	333	-2.1856	3.60113	0.188556	OK
TOE1	525	N/A	4.40851	0.132624	OK
TESK2	173.5	N/A	0.0914314	0.0079175	OK
MMACHC	15	N/A	0.0671331	0.0652068	OK
PRDX1	13215.5	-1.14186	143.108	0.299102	OK
AKR1A1	1943.5	-3.20018	6.71705	0.0569453	OK
NASP	3715	-3.77914	9.91475	0.0425471	OK
CCDC17	123.5	N/A	1.28957	0.166069	OK
GPBP1L1	2234.5	-1.34983	3.72867	0.0418437	OK
RPS15AP10	14	N/A	0.701443	0.458623	OK
TMEM69	297	0.47254	0.144241	#NUM!	OK
IPP	28	N/A	1.17144	0.416083	OK
MAST2	742	-4.31707	6.1167	0.122193	OK
PIK3R3	3693	-3.27483	206.71	0.518908	OK
TSPAN1	375.5	-1.28036	5.79045	0.387259	OK
POMGNT1	1050.5	-1.94479	1.5354	0.0294523	OK
LURAP1	22.5	N/A	0.130745	0.0907433	OK
RAD54L	38.5	N/A	0.0498781	0.0197108	OK
LRRC41	1943	-1.31546	4.51486	0.0593791	OK
UQCRH	3150.5	-0.791137	7.46237	0.0827681	OK
NSUN4	624	N/A	3.18778	0.0794947	OK
FAAH	163.5	N/A	0.741008	0.0660006	OK
DMBX1	2	N/A	0.065111	0.5	Low
MKNK1-AS1	9.5	N/A	0.0315445	0.051161	Low
KNCN	0	N/A	0	#DIV/0!	Low
MKNK1	731	-1.09288	3.55861	0.131727	OK
MOB3C	1741	-3.06921	10.9488	0.102222	OK
ATPAF1	439.5	N/A	8.18822	0.236863	OK
TEX38	0.5	N/A	0.0162778	0.5	Low
EFCAB14-AS1	0.5	N/A	0.0162778	0.5	Low
EFCAB14	2261	0.271273	26.5147	#NUM!	OK
CYP4B1	1058.5	-0.12821	14.745	0.824475	OK
CYP4Z2P	8	N/A	0.0635776	0.112329	Low
CYP4A11	22	N/A	1.2742	0.49197	OK
CYP4X1	114	-1.92674	5.08355	0.52778	OK
CYP4Z1	8	N/A	0.167867	0.336048	Low
CYP4A22	1	N/A	0.0325555	0.5	Low
LINC00853	4.5	N/A	0.223811	0.456904	Low
PDZK1IP1	1212.5	-0.125511	34.9836	0.938322	OK
TAL1	829	-2.0811	12.4496	0.253877	OK
STIL	26	N/A	0.290978	0.178364	OK
CMPK1	2781	-1.4816	34.6281	0.254507	OK
FOXE3	0	N/A	0	#DIV/0!	Low
FOXD2-AS1	36.5	N/A	0.292966	0.113367	OK
FOXD2	14	N/A	0.331133	0.285122	OK
TRABD2B	93.5	0.264787	3.0199	#NUM!	OK
SLC5A9	66	0.893771	0.3434	#NUM!	OK
SPATA6	186.5	-1.58055	6.98184	0.516959	OK
AGBL4	3.5	N/A	0.113944	0.5	Low
BEND5	124.5	N/A	1.13119	0.127081	OK
ELAVL4	5.5	N/A	0.144966	0.308664	Low
DMRTA2	3	N/A	0.180066	0.5	Low
FAF1	829	-1.77408	6.61716	0.157766	OK
CDKN2C	196	-0.616985	6.48741	0.681332	OK
C1orf185	0	N/A	0	#DIV/0!	Low
RNF11	2227	-1.38249	11.8371	0.123767	OK
TTC39A	183	N/A	1.21711	0.0951065	OK
EPS15	1471	0.0934867	3.39885	#NUM!	OK
OSBPL9	1218	0.0767725	12.6537	#NUM!	OK
MIR761	0	N/A	0	#DIV/0!	Low
RAB3B	11	0.787096	0.0584887	#NUM!	OK
TXNDC12	1666	0.66737	9.47621	#NUM!	OK
KTI12	0	N/A	0	#DIV/0!	Low
BTF3L4	1116.5	0.509212	4.52479	#NUM!	OK
ZFYVE9	407	-1.31338	4.75626	0.257487	OK
CC2D1B	1060	N/A	6.08751	0.0896525	OK
ORC1	26	N/A	0.290978	0.178364	OK
PRPF38A	1296.5	-1.08879	11.6576	0.258057	OK
GPX7	128	-1.77548	0.970953	0.150548	OK
ZYG11B	450.5	-1.66351	6.90433	0.284348	OK
ZYG11A	0	N/A	0	#DIV/0!	Low
ECHDC2	578.5	-2.8222	16.7627	0.373239	OK
SCP2	1180.5	-1.55377	37.667	0.479074	OK
PODN	811	N/A	41.9198	0.465877	OK
SLC1A7	81.5	N/A	4.01232	0.454517	OK
CPT2	250.5	-2.19219	2.769	0.191973	OK
C1orf123	942.5	-1.31029	18.7529	0.385766	OK
MAGOH	1435.5	-0.959366	8.12857	0.178286	OK
LOC100507564	1	N/A	0.0325555	0.5	Low
LRP8	159	-2.70224	4.38942	0.486575	OK
SLC25A3P1	0	N/A	0	#DIV/0!	Low
DMRTB1	0	N/A	0	#DIV/0!	Low
GLIS1	8	N/A	0.156155	0.245856	Low
YIPF1	524.5	1.20247	0.365105	#NUM!	OK
DIO1	3	N/A	0.00508891	0.0258758	Low
HSPB11	453.5	-0.0640473	0.0903714	0.0690325	OK
LRRC42	803.5	-3.61883	11.0682	0.238554	OK
LDLRAD1	25	N/A	0.0193108	0.0115846	OK
TMEM59	4586.5	0.0969464	20.6567	#NUM!	OK
TCEANC2	64.5	1.56972	0.260899	#NUM!	OK
MIR4781	0	N/A	0	#DIV/0!	Low
CDCP2	0	N/A	0	#DIV/0!	Low
CYB5RL	30	N/A	0.597154	0.249698	OK
MRPL37	1174.5	-3.61468	4.48813	0.0609226	OK
SSBP3	707.5	-0.703251	8.81368	0.39021	OK
ACOT11	12	N/A	0.303666	0.299703	OK
FAM151A	1	N/A	0.0325555	0.5	Low
MROH7	9.5	N/A	0.385055	0.408555	Low
TTC4	12.5	N/A	0.268078	0.343196	OK
PARS2	47	N/A	0.696911	0.237899	OK
TTC22	11	N/A	0.358111	0.5	OK
DHCR24	1836	-1.51961	11.8832	0.14101	OK
TMEM61	7	N/A	0.135311	0.310209	Low
BSND	0	N/A	0	#DIV/0!	Low
PCSK9	48.5	3.40199	1.06977	#NUM!	OK
USP24	1812	-1.46921	25.1072	0.329449	OK
LOC100507634	36	2.33002	0.107356	#NUM!	OK
MIR4422	0	N/A	0	#DIV/0!	Low
PRKAA2	128.5	N/A	0.156257	0.018491	OK
C8A	6	5.13515	0.0564667	#NUM!	Low
C8B	11	N/A	0.126667	0.183675	OK
DAB1	5.5	N/A	0.237544	0.423636	Low
OMA1	140	-0.0167649	2.75586	0.982049	OK
TACSTD2	4773.5	-0.769791	134.62	0.706732	OK
MYSM1	862	-5.2908	12.9727	0.247228	OK
JUN	25714	-4.53821	208.577	0.13356	OK
HSD52	0	N/A	0	#DIV/0!	Low
FGGY	168.5	N/A	2.70752	0.209793	OK
MIR4711	0	N/A	0	#DIV/0!	Low
HOOK1	140	N/A	2.47478	0.28394	OK
CYP2J2	9	N/A	0.293	0.5	Low
C1orf87	20.5	N/A	0.258388	0.170422	OK
NFIA	913.5	-1.74128	38.6291	0.530799	OK
MGC34796	1.5	N/A	0.0437444	0.331406	Low
TM2D1	533	-1.60362	0.793127	0.0330702	OK
L1TD1	24.5	N/A	0.220744	0.126109	OK
KANK4	50	N/A	1.381	0.319102	OK
USP1	663.5	-0.0709026	3.17764	0.753114	OK
DOCK7	625.5	N/A	11.3372	0.291097	OK
ANGPTL3	3	N/A	0.0976666	0.5	Low
ATG4C	125	1.1008	1.80924	#NUM!	OK
LINC00466	0	N/A	0	#DIV/0!	Low
FOXD3	0	N/A	0	#DIV/0!	Low
ALG6	130	1.40485	2.66482	#NUM!	OK
ITGB3BP	86.5	1.89107	2.04427	#NUM!	OK
EFCAB7	66	N/A	1.69331	0.302717	OK
DLEU2L	2	N/A	0.065111	0.5	Low
PGM1	1322.5	-1.02595	17.2134	0.322596	OK
ROR1	151	-2.79801	1.99969	0.244425	OK
UBE2U	0	N/A	0	#DIV/0!	Low
CACHD1	410.5	-0.992955	2.92963	0.199213	OK
MIR4794	0	N/A	0	#DIV/0!	Low
RAVER2	281.5	-1.4632	6.29609	0.3966	OK
JAK1	11080.5	-0.182761	221.865	0.864842	OK
MIR3671	8	N/A	0.167867	0.336048	Low
MIR101-1	3	N/A	0.0976666	0.5	Low
AK4	886.5	-4.31381	14.6961	0.278674	OK
DNAJC6	94	0.370911	0.375467	#NUM!	OK
LEPROT	2035	-0.873887	33.9185	0.420891	OK
LEPR	533.5	N/A	24.9859	0.442794	OK
PDE4B	4645	2.29241	92.9891	#NUM!	OK
SGIP1	1027.5	-2.8199	7.71421	0.13709	OK
MIR3117	0	N/A	0	#DIV/0!	Low
TCTEX1D1	194	-1.45185	10.7185	0.622888	OK
INSL5	0.5	N/A	0.0162778	0.5	Low
WDR78	71	2.33893	0.419599	#NUM!	OK
MIER1	1186.5	2.55056	7.6599	#NUM!	OK
SLC35D1	255	N/A	0.33998	0.0202897	OK
C1orf141	7	N/A	0.373866	0.473454	Low
IL23R	4.5	2.62177	0.2701	#NUM!	Low
IL12RB2	30	2.42096	0.606355	#NUM!	OK
SERBP1	6881	-0.314057	24.6949	0.266986	OK
GADD45A	9641	-3.95065	202.127	0.354579	OK
GNG12	2801	-0.652571	10.9695	0.163237	OK
GNG12-AS1	25.5	N/A	0.0432558	0.0258758	OK
DIRAS3	95.5	N/A	0.825498	0.121398	OK
WLS	1653.5	-0.441956	15.9267	0.43338	OK
MIR1262	0.5	N/A	0.0162778	0.5	Low
RPE65	0	N/A	0	#DIV/0!	Low
DEPDC1	3.5	N/A	0.071211	0.254042	Low
LRRC7	2.5	N/A	0.150055	0.5	Low
PIN1P1	2.5	N/A	0.150055	0.5	Low
LRRC40	250	N/A	1.39662	0.0806309	OK
SRSF11	3019	-1.14859	7.18871	0.0662895	OK
ANKRD13C	553.5	-1.05211	2.57905	0.129598	OK
HHLA3	185	N/A	9.15996	0.455856	OK
CTH	131.5	N/A	1.41114	0.170813	OK
PTGER3	42	N/A	0.53051	0.17074	OK
ZRANB2-AS1	3	N/A	0.0976666	0.5	Low
ZRANB2	1591.5	-1.23354	9.04124	0.152293	OK
MIR186	2.5	N/A	0.0111888	0.0652068	Low
ZRANB2-AS2	5.5	N/A	0.330122	0.5	Low
NEGR1	125	N/A	3.79966	0.340904	OK
NEGR1-IT1	0	N/A	0	#DIV/0!	Low
LRRIQ3	0.5	N/A	0.0162778	0.5	Low
FPGT-TNNI3K	0	N/A	0	#DIV/0!	Low
FPGT	96.5	N/A	2.82965	0.332654	OK
TNNI3K	0	N/A	0	#DIV/0!	Low
CRYZ	330	-0.621304	4.76343	0.461991	OK
TYW3	388.5	-0.826397	4.34018	0.326296	OK
LHX8	1	N/A	0.0600221	0.5	Low
SLC44A5	3	N/A	0.180066	0.5	Low
ACADM	451.5	-0.845174	6.22373	0.376443	OK
RABGGTB	2433.5	-1.25474	25.3437	0.273531	OK
SNORD45C	8	N/A	0.156155	0.245856	Low
SNORD45A	3.5	N/A	0.113944	0.5	Low
SNORD45B	10.5	N/A	0.121055	0.157538	OK
MSH4	6.5	N/A	0.112411	0.222955	Low
ASB17	0	N/A	0	#DIV/0!	Low
ST6GALNAC3	163	0.497086	4.59926	#NUM!	OK
ST6GALNAC5	92	N/A	1.00469	0.17392	OK
PIGK	220	-0.569706	6.12268	0.659878	OK
AK5	18.5	N/A	0.69381	0.390116	OK
ZZZ3	576	-1.4533	5.23564	0.221303	OK
USP33	745	-2.43241	0.137385	0.00341777	OK
NEXN	510.5	1.78097	15.4123	#NUM!	OK
FUBP1	2379	-1.87615	40.2334	0.355563	OK
DNAJB4	964.5	-5.58053	3.16362	0.0516	OK
GIPC2	147	-0.353051	7.71232	0.85061	OK
MGC27382	1.5	N/A	0.0488333	0.5	Low
PTGFR	40.5	N/A	0.810787	0.250829	OK
IFI44L	1143.5	4.34489	19.3135	#NUM!	OK
IFI44	1906	2.63834	30.8984	#NUM!	OK
MIR548AP	0	N/A	0	#DIV/0!	Low
TTLL7	73.5	N/A	0.819011	0.177569	OK
PRKACB	322	1.07597	3.35748	#NUM!	OK
SAMD13	22.5	N/A	1.07277	0.447	OK
UOX	3	N/A	0.0874887	0.331406	Low
DNASE2B	39	2.79986	1.69282	#NUM!	OK
RPF1	1348.5	-0.457948	7.14779	0.284655	OK
GNG5	4452	3.32053	7.78339	#NUM!	OK
CTBS	343	1.67399	3.87732	#NUM!	OK
SSX2IP	83.5	N/A	2.28081	0.316612	OK
LPAR3	28	N/A	0.199377	0.101399	OK
MCOLN2	243.5	1.19561	5.28881	#NUM!	OK
MCOLN3	77	N/A	1.56664	0.254042	OK
WDR63	19.5	N/A	0.171944	0.139486	OK
MIR4423	0	N/A	0	#DIV/0!	Low
SYDE2	53.5	N/A	0.214189	0.0619279	OK
C1orf52	898	-0.908283	6.83107	0.246344	OK
BCL10	1239.5	-1.29092	18.6894	0.378278	OK
LOC646626	27	N/A	0.000488602	0.00027287	OK
DDAH1	1370	1.45061	6.32021	#NUM!	OK
CYR61	12972.5	-0.475037	198.52	0.615201	OK
ZNHIT6	615	-0.475707	2.10441	0.174867	OK
COL24A1	24	N/A	0.931354	0.39822	OK
ODF2L	633.5	-1.99468	0.812306	0.0260349	OK
CLCA2	4.5	N/A	0.2701	0.5	Low
CLCA1	0.5	N/A	0.0162778	0.5	Low
CLCA4	0	N/A	0	#DIV/0!	Low
CLCA3P	3	5.53915	0.00508891	#NUM!	Low
SH3GLB1	3504	0.593765	1.03724	#NUM!	OK
HS2ST1	416.5	-3.43951	1.53078	0.0593444	OK
LMO4	941	-0.764135	13.6174	0.412392	OK
PKN2	580	-2.89019	0.559104	0.016687	OK
GTF2B	1325.5	1.86349	14.5921	#NUM!	OK
RBMXL1	756.5	0.0678792	6.06643	#NUM!	OK
GBP3	1125	4.40749	29.6354	#NUM!	OK
GBP1	4155	3.79482	99.4406	#NUM!	OK
GBP2	3829	1.00712	72.2561	#NUM!	OK
GBP7	15	N/A	0.0671331	0.0652068	OK
GBP4	3879.5	3.0106	70.1508	#NUM!	OK
GBP5	612.5	4.85947	16.7926	#NUM!	OK
GBP6	7.5	N/A	0.126144	0.217903	Low
GBP1P1	192	3.07268	1.34404	#NUM!	OK
LRRC8B	526	-0.561535	0.413938	0.0369717	OK
LRRC8C	943.5	-0.450209	4.10006	0.240103	OK
LRRC8D	257.5	-0.195494	1.34715	0.504823	OK
GEMIN8P4	23.5	N/A	0.0707224	0.0462836	OK
ZNF326	411.5	-1.1514	3.68398	0.221614	OK
BARHL2	0	N/A	0	#DIV/0!	Low
ZNF644	898	-1.23605	15.5797	0.434699	OK
HFM1	10	N/A	0.322488	0.354598	OK
CDC7	224.5	N/A	2.45823	0.150465	OK
TGFBR3	1450	-1.50162	23.7553	0.314237	OK
BRDT	3	N/A	0.0874887	0.331406	Low
EPHX4	25	N/A	0.111888	0.0652068	OK
BTBD8	3.5	N/A	0.113944	0.5	Low
KIAA1107	20	N/A	0.274666	0.183611	OK
C1orf146	3.5	N/A	0.071211	0.254042	Low
GLMN	163	N/A	0.723956	0.0688682	OK
RPAP2	233.5	1.37411	0.797257	#NUM!	OK
GFI1	86.5	N/A	1.14965	0.21279	OK
EVI5	417.5	N/A	2.33143	0.0806004	OK
RPL5	25454.5	-1.79299	116.117	0.0930269	OK
FAM69A	170	-1.02005	1.46102	0.257157	OK
SNORD21	20.5	N/A	0.58241	0.325465	OK
SNORA66	13	N/A	0.145489	0.178364	OK
MTF2	445.5	0.0125364	0.494095	#NUM!	OK
TMED5	1865	1.06646	23.2221	#NUM!	OK
CCDC18	58	N/A	0.84282	0.192724	OK
DR1	1051.5	-0.0469985	0.901088	0.357698	OK
FNBP1L	951.5	-1.7318	13.507	0.262538	OK
BCAR3	1366	-2.40167	31.51	0.431254	OK
LOC100129046	10	N/A	0.325555	0.5	OK
MIR760	0	N/A	0	#DIV/0!	Low
DNTTIP2	4020	-1.35014	43.4336	0.272229	OK
GCLM	680	-1.81668	7.92709	0.253153	OK
ABCA4	41	N/A	0.733022	0.287164	OK
ARHGAP29	1415.5	-4.2901	17.8425	0.179147	OK
ABCD3	454.5	-1.09112	0.988005	0.0606698	OK
F3	2547.5	0.282282	60.6703	#NUM!	OK
SLC44A3	150	-0.307969	0.532179	0.268352	OK
CNN3	6272.5	-0.953271	138.24	0.478585	OK
LOC729970	225.5	N/A	0.15752	0.010482	OK
ALG14	130	N/A	1.83162	0.187698	OK
TMEM56	46	N/A	0.122555	0.0393896	OK
TMEM56-RWDD3	0	N/A	0	#DIV/0!	Low
RWDD3	117	-0.65169	0.958753	0.297702	OK
PTBP2	525	N/A	0.10365	0.00298146	OK
DPYD	446.5	0.0949675	4.67382	#NUM!	OK
DPYD-AS1	0	N/A	0	#DIV/0!	Low
MIR137HG	0.5	N/A	0.0300111	0.5	Low
MIR2682	0	N/A	0	#DIV/0!	Low
MIR137	0	N/A	0	#DIV/0!	Low
SNX7	291	-0.224171	4.41299	0.734355	OK
LOC100129620	0	N/A	0	#DIV/0!	Low
PALMD	443.5	N/A	24.1665	0.478065	OK
MIR548AA1	0	N/A	0	#DIV/0!	Low
MIR548D1	0	N/A	0	#DIV/0!	Low
FRRS1	41.5	N/A	0.315344	0.107742	OK
AGL	170.5	-0.163652	3.98478	0.858795	OK
SLC35A3	323.5	N/A	4.60473	0.18935	OK
SASS6	33	N/A	0.175466	0.0769211	OK
TRMT13	215.5	0.358679	0.0723911	#NUM!	OK
LRRC39	16.5	N/A	0.38861	0.284218	OK
DBT	152	-1.1285	2.87437	0.400906	OK
RTCA	563	-1.19841	9.90743	0.370269	OK
MIR553	0	N/A	0	#DIV/0!	Low
CDC14A	410	N/A	4.83062	0.188054	OK
GPR88	3	N/A	0.180066	0.5	Low
VCAM1	2188	0.573715	4.483	#NUM!	OK
EXTL2	225.5	0.0376974	3.39774	#NUM!	OK
SLC30A7	1766	-0.133658	26.8961	0.862745	OK
DPH5	273	N/A	1.06444	0.0570784	OK
S1PR1	11471	-1.02375	59.9302	0.157652	OK
OLFM3	0	N/A	0	#DIV/0!	Low
DNAJA1P5	0	N/A	0	#DIV/0!	Low
COL11A1	24	N/A	1.25538	0.468635	OK
RNPC3	138.5	N/A	0.490253	0.05197	OK
AMY2B	330.5	-1.98071	8.26511	0.377916	OK
ACTG1P4	10.5	N/A	0.0284776	0.040083	OK
AMY2A	0	N/A	0	#DIV/0!	Low
AMY1A	0	N/A	0	#DIV/0!	Low
AMY1C	0	N/A	0	#DIV/0!	Low
AMY1B	0	N/A	0	#DIV/0!	Low
LOC100129138	0	N/A	0	#DIV/0!	Low
PRMT6	153.5	N/A	2.08492	0.181869	OK
NTNG1	27	N/A	0.555955	0.256435	OK
VAV3	136	1.12007	2.56206	#NUM!	OK
VAV3-AS1	1.5	N/A	0.0437444	0.331406	Low
SLC25A24	484	-1.97969	2.56456	0.110079	OK
NBPF4	0	N/A	0	#DIV/0!	Low
NBPF6	0	N/A	0	#DIV/0!	Low
FAM102B	351.5	-0.942505	3.83205	0.295208	OK
HENMT1	102	N/A	1.63224	0.209073	OK
PRPF38B	1992.5	-2.19108	14.8287	0.14886	OK
FNDC7	5.5	N/A	0.0401889	0.114897	Low
STXBP3	676.5	-0.430758	1.84188	0.158792	OK
AKNAD1	6.5	N/A	0.297566	0.437421	Low
GPSM2	123.5	-1.1812	1.48776	0.280039	OK
CLCC1	544	N/A	2.89778	0.0829828	OK
WDR47	379.5	-0.952855	0.23574	0.0192894	OK
TAF13	30	N/A	0.513777	0.275102	OK
TMEM167B	2666.5	-0.263404	33.0217	0.695054	OK
SCARNA2	549.5	-1.85266	17.4727	0.592182	OK
C1orf194	27	3.25105	0.278222	#NUM!	OK
KIAA1324	61	1.07149	0.652576	#NUM!	OK
SARS	5614	-2.74646	27.9306	0.0907421	OK
CELSR2	37	N/A	0.461843	0.168975	OK
PSRC1	172	N/A	7.77792	0.434518	OK
MYBPHL	6.5	N/A	0.204989	0.349408	Low
SORT1	1619	-2.19512	64.7274	0.482301	OK
PSMA5	3594.5	-1.26024	61.7983	0.427695	OK
SYPL2	69.5	N/A	0.607298	0.122613	OK
ATXN7L2	114	N/A	0.917553	0.113658	OK
CYB561D1	182	N/A	1.15709	0.0911482	OK
AMIGO1	20.5	N/A	0.350966	0.221114	OK
GPR61	1.5	N/A	0.0900332	0.5	Low
GNAI3	2868.5	0.652738	30.3401	#NUM!	OK
MIR197	3.5	N/A	0.113944	0.5	Low
GNAT2	8.5	N/A	0.137855	0.260469	Low
AMPD2	1589.5	-2.66169	31.1485	0.362168	OK
GSTM4	334.5	-0.932185	16.5595	0.681325	OK
GSTM2	471	N/A	22.4843	0.447291	OK
GSTM1	334	N/A	19.9085	0.498442	OK
GSTM5	390.5	-2.70684	17.6063	0.486257	OK
GSTM3	1127	-2.64848	32.882	0.381207	OK
EPS8L3	0.5	5.67429	0.0162778	#NUM!	Low
CSF1	8957	-2.06212	244.848	0.516709	OK
AHCYL1	3730	-0.827333	43.528	0.384508	OK
STRIP1	828.5	-3.75703	4.24444	0.0860183	OK
ALX3	74	N/A	0.603844	0.128761	OK
UBL4B	1.5	N/A	0.00254446	0.0258758	Low
SLC6A17	18	0.860547	0.524932	#NUM!	OK
KCNC4	185.5	N/A	5.44058	0.332704	OK
RBM15	545.5	-1.30751	8.26983	0.377743	OK
SLC16A4	194	0.435356	0.668535	#NUM!	OK
LAMTOR5	2482	-0.0565367	12.2491	0.804384	OK
PROK1	0.5	N/A	0.0162778	0.5	Low
CYMP	2	N/A	0.065111	0.5	Low
KCNA10	0.5	N/A	0.0162778	0.5	Low
KCNA2	1	N/A	0.0137333	0.183611	Low
KCNA3	109	-0.740556	1.46555	0.458014	OK
CD53	2498	4.11009	43.9223	#NUM!	OK
LRIF1	388.5	-1.35256	5.19532	0.332062	OK
DRAM2	931	0.696	5.88867	#NUM!	OK
CEPT1	685.5	0.496222	8.15243	#NUM!	OK
DENND2D	750.5	0.800502	10.2685	#NUM!	OK
CHI3L2	556	4.33352	12.1296	#NUM!	OK
CHIAP2	37	N/A	0.139911	0.0584182	OK
CHIA	55.5	N/A	2.49803	0.433412	OK
PIFO	141.5	1.09159	0.901764	#NUM!	OK
PGCP1	0.5	N/A	0.0162778	0.5	Low
OVGP1	205	N/A	1.16551	0.0887294	OK
WDR77	1122	-1.89599	13.6606	0.25922	OK
C1orf162	1259.5	1.33606	54.9531	#NUM!	OK
ADORA3	63.5	-0.176044	3.62625	0.924598	OK
RAP1A	1867.5	-1.62784	28.6789	0.287693	OK
DDX20	458.5	-1.6448	3.90997	0.194802	OK
KCND3	6	N/A	0.0101778	0.0258758	Low
CTTNBP2NL	1721.5	-0.789019	22.2535	0.429377	OK
MIR4256	0.5	N/A	0.0162778	0.5	Low
WNT2B	127.5	N/A	0.848364	0.0951465	OK
ST7L	470.5	-0.817465	2.1798	0.153389	OK
CAPZA1	4310.5	2.37221	31.0427	#NUM!	OK
MOV10	1759	0.344474	7.55096	#NUM!	OK
RHOC	15795.5	-2.98495	51.5276	0.0574726	OK
PPM1J	37	N/A	0.276688	0.106148	OK
FAM19A3	1.5	N/A	0.0488333	0.5	Low
SLC16A1	812.5	0.433281	9.78738	#NUM!	OK
AKR7A2P1	1.5	N/A	0.0488333	0.5	Low
LRIG2	186	N/A	0.176646	0.014416	OK
LOC643441	30	-0.696913	0.273133	0.309812	OK
MAGI3	349.5	0.102518	2.4622	#NUM!	OK
PHTF1	366.5	-1.60249	1.10001	0.0686738	OK
RSBN1	638	-1.61919	4.7082	0.169876	OK
PTPN22	129.5	-0.201448	2.3181	0.832903	OK
AP4B1-AS1	10.5	N/A	0.259922	0.294912	OK
BCL2L15	17.5	N/A	0.402344	0.279114	OK
AP4B1	322	-2.06536	1.08933	0.065248	OK
DCLRE1B	225	N/A	1.51617	0.0962856	OK
HIPK1	2165	-3.23444	17.9912	0.146286	OK
OLFML3	582.5	-1.10338	25.4737	0.62217	OK
SYT6	2.5	N/A	0.0813888	0.5	Low
TRIM33	1105.5	-1.01763	4.14342	0.113492	OK
BCAS2	1380.5	-0.944145	13.1425	0.296817	OK
DENND2C	42	0.639506	0.580422	#NUM!	OK
AMPD1	8.5	N/A	0.41761	0.45404	Low
NRAS	1360.5	-0.421099	6.01093	0.25675	OK
CSDE1	13340.5	-1.14992	47.7912	0.0952121	OK
SIKE1	516	-0.287344	1.61591	0.253153	OK
SYCP1	3	N/A	0.180066	0.5	Low
TSHB	0	N/A	0	#DIV/0!	Low
TSPAN2	179.5	-1.21904	7.07087	0.578071	OK
NGF	244.5	N/A	6.57116	0.423654	OK
VANGL1	128	N/A	1.71157	0.179424	OK
CASQ2	260.5	N/A	13.3213	0.463385	OK
NHLH2	7.5	N/A	0.0335665	0.0652068	Low
SLC22A15	92	0.985673	0.356645	#NUM!	OK
MAB21L3	1.5	N/A	0.0900332	0.5	Low
ATP1A1	10422	-2.71979	12.1311	0.0205202	OK
CD58	646	-0.314754	1.31183	0.15534	OK
IGSF3	2566	-3.09401	78.0291	0.511766	OK
MIR320B1	0	N/A	0	#DIV/0!	Low
CD2	728.5	-3.01856	12.8388	0.316973	OK
PTGFRN	312	-3.05864	2.29437	0.118446	OK
CD101	45.5	N/A	1.62008	0.377833	OK
TTF2	210.5	-3.23024	3.65901	0.307781	OK
MIR942	0	N/A	0	#DIV/0!	Low
TRIM45	118.5	N/A	0.895345	0.118931	OK
VTCN1	9.5	N/A	0.292477	0.343841	Low
MAN1A2	183	-0.060088	2.67115	0.932846	OK
GDAP2	486.5	-1.19139	5.23812	0.290507	OK
WDR3	1166	-0.132918	15.3708	0.840608	OK
SPAG17	25.5	1.84378	0.506144	#NUM!	OK
TBX15	35.5	N/A	2.0845	0.495067	OK
WARS2	321	0.352777	1.79431	#NUM!	OK
HAO2	2	N/A	0.065111	0.5	Low
HSD3B2	0	N/A	0	#DIV/0!	Low
HSD3B1	1	N/A	0.0325555	0.5	Low
HSD3BP4	30	N/A	0.745222	0.39428	OK
LINC00622	172.5	N/A	4.13459	0.381394	OK
ZNF697	1183.5	-4.64061	28.6237	0.39688	OK
PHGDH	175	-3.37015	4.06973	0.307372	OK
HMGCS2	3	N/A	0.0976666	0.5	Low
REG4	0.5	N/A	0.0300111	0.5	Low
NBPF7	0	N/A	0	#DIV/0!	Low
ADAM30	0	N/A	0	#DIV/0!	Low
NOTCH2	4706	-3.73152	111.361	0.400243	OK
FAM72B	6	N/A	0.036111	0.0865425	Low
HIST2H2BA	8.5	N/A	0.184144	0.346546	Low
FCGR1B	19	3.83624	0.631243	#NUM!	OK
SRGAP2D	30	N/A	0.976666	0.5	OK
EMBP1	5.5	4.06847	0.0523888	#NUM!	Low
ANKRD20A12P	88	N/A	4.77277	0.47699	OK
PPIAL4G	2	N/A	0.065111	0.5	Low
FAM72D	8	N/A	0.029	0.0559521	Low
LINC00623	0.5	N/A	0.0162778	0.5	Low
PPIAL4C	0	N/A	0	#DIV/0!	Low
PPIAL4A	0	N/A	0	#DIV/0!	Low
PFN1P2	21	N/A	0.288399	0.183611	OK
NBPF9	292	N/A	6.63631	0.362758	OK
PDE4DIP	2615.5	-3.82368	54.7835	0.356091	OK
SEC22B	2756	1.25287	54.7287	#NUM!	OK
NBPF10	411	N/A	9.26061	0.359799	OK
TXNIP	21713	-0.6649	810.655	0.691189	OK
POLR3GL	659.5	-3.00374	18.5232	0.36008	OK
ANKRD34A	25.5	N/A	0.327055	0.173035	OK
LIX1L	248	-0.316784	0.389824	0.120139	OK
RBM8A	4375.5	-1.74323	41.0279	0.208117	OK
GNRHR2	38	1.73726	0.475577	#NUM!	OK
PEX11B	466	1.92633	5.19621	#NUM!	OK
ITGA10	478.5	N/A	3.49318	0.103791	OK
ANKRD35	117.5	N/A	5.10847	0.425204	OK
PIAS3	999.5	-3.42495	8.24121	0.127854	OK
NUDT17	54	N/A	0.0935549	0.0257988	OK
POLR3C	667.5	-5.02984	3.44672	0.0828834	OK
RNF115	401	0.252764	6.43283	#NUM!	OK
CD160	80	N/A	1.74671	0.268353	OK
PDZK1	13	N/A	0.271111	0.258996	OK
GPR89A	154.5	N/A	0.678679	0.0680949	OK
PDZK1P1	0	N/A	0	#DIV/0!	Low
NBPF11	0	N/A	0	#DIV/0!	Low
HYDIN2	0.5	N/A	0.0300111	0.5	Low
LOC728989	8	N/A	0.121578	0.24391	Low
PRKAB2	524.5	-1.88541	2.17037	0.0875687	OK
FMO5	48	N/A	1.909	0.40405	OK
CHD1L	983.5	-1.01783	3.78217	0.116448	OK
LINC00624	0	N/A	0	#DIV/0!	Low
BCL9	295.5	0.189194	0.269814	#NUM!	OK
ACP6	126	0.924063	1.26751	#NUM!	OK
GJA5	454	-3.1655	10.8175	0.317235	OK
GJA8	1	N/A	0.0600221	0.5	Low
GPR89B	18.5	N/A	0.000522418	0.000425944	OK
MIR5087	0	N/A	0	#DIV/0!	Low
NBPF14	302	-2.22499	3.67535	0.242808	OK
PPIAL4F	0	N/A	0	#DIV/0!	Low
PPIAL4D	0	N/A	0	#DIV/0!	Low
NBPF15	61.5	N/A	1.49299	0.385959	OK
PPIAL4E	0	N/A	0	#DIV/0!	Low
HIST2H2BF	22	N/A	0.716222	0.5	OK
FCGR1A	97.5	2.13159	2.75081	#NUM!	OK
HIST2H3D	3.5	N/A	0.113944	0.5	Low
HIST2H4A	0	N/A	0	#DIV/0!	Low
HIST2H4B	0	N/A	0	#DIV/0!	Low
HIST2H3C	0	N/A	0	#DIV/0!	Low
HIST2H3A	0	N/A	0	#DIV/0!	Low
HIST2H2AA4	0	N/A	0	#DIV/0!	Low
HIST2H2AA3	0	N/A	0	#DIV/0!	Low
HIST2H2BC	7	4.36747	0.1816	#NUM!	Low
HIST2H2BE	440.5	3.81191	2.62963	#NUM!	OK
HIST2H2AC	50.5	0.76254	0.579411	#NUM!	OK
HIST2H2AB	8	N/A	0.260444	0.5	Low
BOLA1	182	-1.31994	2.08286	0.252369	OK
SV2A	87.5	0.50565	1.36368	#NUM!	OK
SF3B4	1665	2.09597	8.84189	#NUM!	OK
MTMR11	356.5	N/A	8.76104	0.293338	OK
OTUD7B	1020.5	-5.58091	11.0969	0.176665	OK
VPS45	487	1.55076	5.29945	#NUM!	OK
PLEKHO1	2934	-5.02542	52.4693	0.295103	OK
ANP32E	1013.5	-0.276691	8.52606	0.523928	OK
CA14	13	N/A	0.178533	0.183611	OK
APH1A	3575	-3.64603	52.5219	0.210261	OK
C1orf54	496	-1.52478	18.1062	0.516955	OK
MRPS21	1765	0.5774	15.4907	#NUM!	OK
PRPF3	1727	-0.977544	8.49961	0.153184	OK
RPRD2	596	-2.41279	4.71339	0.136954	OK
TARS2	218	N/A	5.12315	0.283753	OK
ECM1	994	-2.73617	7.91109	0.131822	OK
ADAMTSL4	394.5	-0.963335	3.95969	0.272334	OK
MIR4257	1	N/A	0.0325555	0.5	Low
MCL1	43029	-1.23192	206.348	0.128555	OK
ENSA	5056	-1.53867	53.8825	0.218934	OK
GOLPH3L	461	0.463337	0.565982	#NUM!	OK
HORMAD1	2.5	N/A	0.103767	0.414199	Low
CTSS	4739	1.73042	63.8323	#NUM!	OK
CTSK	650	-0.453576	14.9442	0.667615	OK
ARNT	1323	-1.64351	4.3288	0.0706491	OK
SETDB1	772	-2.50679	1.62208	0.0378478	OK
CERS2	4059.5	-0.282875	4.95745	0.103411	OK
ANXA9	13	N/A	0.409977	0.349408	OK
BNIPL	65.5	N/A	0.141967	0.033162	OK
C1orf56	73.5	-1.94613	0.33821	0.0901696	OK
CDC42SE1	7272.5	-0.0194511	83.4514	0.971185	OK
MLLT11	492	-0.366194	1.39005	0.188231	OK
GABPB2	87	N/A	1.51882	0.224683	OK
SEMA6C	46	N/A	1.46493	0.351676	OK
TNFAIP8L2	171	-3.2835	2.95015	0.245637	OK
TNFAIP8L2-SCNM1	0	N/A	0	#DIV/0!	Low
LYSMD1	95.5	N/A	0.547765	0.0826792	OK
SCNM1	6.5	N/A	0.211611	0.5	Low
TMOD4	16	N/A	0.312311	0.245856	OK
VPS72	929.5	0.72174	1.95667	#NUM!	OK
PIP5K1A	3350	-2.88387	63.0499	0.341377	OK
PSMD4	3004.5	-2.65676	14.2059	0.0815678	OK
ZNF687	302	N/A	0.157403	0.00788856	OK
PI4KB	2081	-2.97906	8.91494	0.0759237	OK
RFX5	1487	-1.37885	14.8507	0.249558	OK
SELENBP1	2182.5	-5.05879	63	0.337472	OK
PSMB4	7411	-2.20296	48.2909	0.12973	OK
POGZ	2204.5	-2.69366	5.52934	0.0454664	OK
CGN	1037	-2.80318	10.662	0.189295	OK
TUFT1	537	-0.751889	10.3538	0.582748	OK
MIR554	2	N/A	0.0188222	0.149186	Low
SNX27	700	-2.39233	3.36432	0.0860803	OK
CELF3	2	N/A	0.065111	0.5	Low
RIIAD1	15.5	N/A	0.0045665	0.0044337	OK
MRPL9	928	0.202483	2.99369	#NUM!	OK
OAZ3	22	N/A	0.533577	0.290496	OK
TDRKH	106	N/A	0.442112	0.0645764	OK
LINGO4	0.5	N/A	0.0162778	0.5	Low
RORC	100	N/A	0.632709	0.090735	OK
C2CD4D	0.5	N/A	0.0162778	0.5	Low
LOC100132111	1	N/A	0.0325555	0.5	Low
THEM5	5	N/A	0.0686665	0.183611	Low
THEM4	363	N/A	7.25334	0.250455	OK
S100A10	20139.5	-0.676701	12.7464	0.0255929	OK
S100A11	15717	3.38853	113.962	#NUM!	OK
TCHHL1	0	N/A	0	#DIV/0!	Low
TCHH	47.5	N/A	0.397743	0.117894	OK
RPTN	1	N/A	0.0325555	0.5	Low
HRNR	4.5	N/A	0.0539222	0.191347	Low
FLG	6.5	N/A	0.112411	0.222955	Low
FLG2	0	N/A	0	#DIV/0!	Low
CRNN	0	N/A	0	#DIV/0!	Low
LCE5A	1	N/A	0.0325555	0.5	Low
CRCT1	0	N/A	0	#DIV/0!	Low
LCE3E	0	N/A	0	#DIV/0!	Low
LCE3D	0	N/A	0	#DIV/0!	Low
LCE3C	1	N/A	0.0600221	0.5	Low
LCE3B	0	N/A	0	#DIV/0!	Low
LCE3A	2.5	N/A	0.0813888	0.5	Low
LCE2D	0	N/A	0	#DIV/0!	Low
LCE2C	0	N/A	0	#DIV/0!	Low
LCE2B	0	N/A	0	#DIV/0!	Low
LCE2A	0	N/A	0	#DIV/0!	Low
LCE4A	0	N/A	0	#DIV/0!	Low
C1orf68	0	N/A	0	#DIV/0!	Low
KPRP	1	N/A	0.0325555	0.5	Low
LCE1F	0	N/A	0	#DIV/0!	Low
LCE1E	0	N/A	0	#DIV/0!	Low
LCE1D	0	N/A	0	#DIV/0!	Low
LCE1C	0	N/A	0	#DIV/0!	Low
LCE1B	0	N/A	0	#DIV/0!	Low
LCE1A	0	N/A	0	#DIV/0!	Low
LCE6A	0	N/A	0	#DIV/0!	Low
SMCP	0	N/A	0	#DIV/0!	Low
IVL	0.5	N/A	0.0162778	0.5	Low
SPRR4	0	N/A	0	#DIV/0!	Low
SPRR1A	0	N/A	0	#DIV/0!	Low
SPRR3	0	N/A	0	#DIV/0!	Low
SPRR1B	4.5	4.82629	0.1465	#NUM!	Low
SPRR2D	10	4.15972	0.325555	#NUM!	OK
SPRR2A	23.5	1.70466	0.765055	#NUM!	OK
SPRR2B	0	N/A	0	#DIV/0!	Low
SPRR2E	6	3.7318	0.0101778	#NUM!	Low
SPRR2F	1.5	N/A	0.0488333	0.5	Low
SPRR2C	2.5	N/A	0.0351	0.225045	Low
SPRR2G	0	N/A	0	#DIV/0!	Low
LELP1	0	N/A	0	#DIV/0!	Low
PRR9	0	N/A	0	#DIV/0!	Low
LOR	0.5	N/A	0.0162778	0.5	Low
PGLYRP3	0	N/A	0	#DIV/0!	Low
PGLYRP4	3.5	N/A	0.113944	0.5	Low
S100A9	11649	3.25147	435.722	#NUM!	OK
S100A12	530.5	6.50759	26.1945	#NUM!	OK
S100A8	5803	4.59855	259.295	#NUM!	OK
S100A7A	0	N/A	0	#DIV/0!	Low
S100A7	221.5	N/A	7.21105	0.5	OK
S100A6	63991.5	-0.289338	726.69	0.645939	OK
S100A5	3.5	N/A	0.113944	0.5	Low
S100A4	9831.5	0.0151363	270.159	#NUM!	OK
S100A3	2003.5	-2.88913	56.7541	0.489843	OK
S100A2	2354.5	N/A	73.6895	0.483832	OK
S100A16	8071	-2.97992	109.493	0.24596	OK
S100A14	1428	-2.87243	18.5308	0.237696	OK
S100A13	2979.5	N/A	40.8027	0.183163	OK
S100A1	19	N/A	0.155667	0.129297	OK
CHTOP	2779	0.285527	23.029	#NUM!	OK
SNAPIN	669	-0.446421	7.89149	0.490162	OK
ILF2	6807	-1.0097	65.9361	0.289627	OK
NPR1	1155	-3.66231	48.4956	0.442481	OK
INTS3	2295.5	-2.24093	22.0082	0.190713	OK
SLC27A3	650.5	N/A	17.7052	0.315815	OK
GATAD2B	1180	-0.243959	5.31901	0.392549	OK
DENND4B	1117.5	-1.77196	3.65904	0.0679935	OK
CRTC2	2468.5	-2.79144	21.4839	0.159951	OK
SLC39A1	4384	-2.21898	23.7611	0.107193	OK
CREB3L4	181.5	-0.833385	0.863345	0.165318	OK
JTB	4061.5	-0.772995	1.41159	0.0126034	OK
RAB13	4738.5	-1.82136	18.9022	0.0811658	OK
RPS27	41340	-0.328091	156.875	0.25877	OK
NUP210L	24.5	N/A	0.103278	0.0652825	OK
TPM3	13638.5	-0.509357	133.213	0.400551	OK
MIR190B	0	N/A	0	#DIV/0!	Low
C1orf189	1.5	N/A	0.0488333	0.5	Low
C1orf43	4675	-0.572755	34.9024	0.301665	OK
UBAP2L	2949	-0.376939	8.47406	0.186802	OK
HAX1	1879.5	-0.30484	9.44865	0.345864	OK
AQP10	5.5	N/A	0.0523888	0.132679	Low
ATP8B2	988	-5.63561	1.29021	0.0202771	OK
IL6R	1674.5	-1.0709	26.3706	0.429778	OK
SHE	604	N/A	29.1249	0.449654	OK
TDRD10	228.5	N/A	8.66958	0.392869	OK
UBE2Q1	1819.5	-2.86945	7.28227	0.0677566	OK
CHRNB2	5.5	N/A	0.0986776	0.229748	Low
ADAR	6092.5	0.415457	39.2035	#NUM!	OK
KCNN3	209	N/A	2.49995	0.162757	OK
PMVK	636.5	-2.50487	20.7532	0.414833	OK
PBXIP1	2143.5	N/A	73.2034	0.368008	OK
PYGO2	699.5	N/A	3.10287	0.0646497	OK
SHC1	6307	-1.51764	57.2225	0.191648	OK
CKS1B	304.5	N/A	0.825851	0.040083	OK
MIR4258	4	N/A	0.00864439	0.032076	Low
FLAD1	829	-4.45291	4.76561	0.0867718	OK
LENEP	4	N/A	0.1938	0.45077	Low
ZBTB7B	350	-1.75106	2.64584	0.167323	OK
DCST2	30.5	N/A	1.22892	0.407146	OK
DCST1	0.5	N/A	0.0162778	0.5	Low
ADAM15	3698	-6.88142	134.476	0.385348	OK
EFNA4	75	N/A	1.14558	0.245164	OK
EFNA3	38	N/A	0.0336004	0.013416	OK
EFNA1	2965	-2.58028	19.734	0.124814	OK
SLC50A1	874	-0.233451	2.48549	0.274524	OK
DPM3	579	-4.0935	13.2748	0.293559	OK
KRTCAP2	2109	0.900364	21.1407	#NUM!	OK
TRIM46	34.5	N/A	0.774676	0.274163	OK
MUC1	1166	0.0520608	4.34825	#NUM!	OK
MIR92B	0	N/A	0	#DIV/0!	Low
THBS3	621	-5.28757	21.0727	0.374084	OK
MTX1	493.5	N/A	9.62415	0.24568	OK
GBAP1	56.5	N/A	1.49341	0.30929	OK
GBA	618	-3.40167	0.895814	0.0238899	OK
FAM189B	217	N/A	0.573108	0.0390539	OK
SCAMP3	1928.5	-2.65025	10.5695	0.101386	OK
CLK2	1596	-0.705497	3.21648	0.0792972	OK
HCN3	39	N/A	0.0198671	0.00770949	OK
PKLR	0.5	N/A	0.0162778	0.5	Low
FDPS	1964.5	-3.90997	15.2911	0.117862	OK
RUSC1-AS1	1.5	N/A	0.0488333	0.5	Low
RUSC1	563.5	-0.901273	8.78022	0.395614	OK
ASH1L	1752	-1.11183	31.3007	0.466799	OK
MIR555	0	N/A	0	#DIV/0!	Low
POU5F1P4	2.5	N/A	0.0813888	0.5	Low
ASH1L-AS1	54.5	1.17078	0.956765	#NUM!	OK
MSTO1	14	N/A	0.0854667	0.0954688	OK
MSTO2P	64	N/A	0.602311	0.149186	OK
YY1AP1	4532	-2.26889	50.7054	0.221658	OK
DAP3	2666	-1.83443	19.6279	0.159302	OK
GON4L	861.5	-2.30569	2.08744	0.0449639	OK
SYT11	550	-5.03017	13.2931	0.297636	OK
RIT1	1528.5	-0.398534	18.0533	0.573925	OK
SCARNA4	3	N/A	0.0976666	0.5	Low
RXFP4	0.5	N/A	0.0162778	0.5	Low
ARHGEF2	4020.5	-0.971757	61.0396	0.43779	OK
SSR2	6683.5	-1.21003	24.0975	0.0974928	OK
UBQLN4	1086.5	-3.13514	6.90395	0.11202	OK
LAMTOR2	1025	-2.43677	21.02	0.305662	OK
RAB25	584	1.3427	4.66289	#NUM!	OK
MEX3A	67	-0.854135	0.59611	0.265987	OK
LMNA	9169	-3.64812	240.902	0.33025	OK
SEMA4A	1047.5	1.18872	17.5305	#NUM!	OK
SLC25A44	1878.5	N/A	5.31521	0.0417786	OK
PMF1	438.5	-0.889316	5.07313	0.320524	OK
PMF1-BGLAP	0	N/A	0	#DIV/0!	Low
BGLAP	6.5	N/A	0.343855	0.471245	Low
PAQR6	38	1.0856	0.126178	#NUM!	OK
SMG5	2013.5	-2.85342	3.01434	0.0264656	OK
TMEM79	90.5	N/A	1.14101	0.2016	OK
VHLL	0	N/A	0	#DIV/0!	Low
CCT3	6337.5	-1.23011	40.7455	0.172637	OK
TSACC	15	N/A	0.256889	0.275102	OK
RHBG	0	N/A	0	#DIV/0!	Low
C1orf61	7.5	N/A	0.244166	0.5	Low
MIR9-1	0	N/A	0	#DIV/0!	Low
MEF2D	2240	-5.31691	16.3205	0.106217	OK
IQGAP3	23	N/A	0.130711	0.081957	OK
TTC24	5	N/A	0.162778	0.5	Low
GPATCH4	1451	-2.60818	1.45841	0.0182553	OK
HAPLN2	34	N/A	2.04075	0.5	OK
BCAN	12.5	N/A	0.518833	0.414199	OK
NES	3241	-5.93483	53.0268	0.21625	OK
CRABP2	415	-4.30904	3.51216	0.140578	OK
ISG20L2	737.5	-5.20285	1.74477	0.0372509	OK
RRNAD1	353	-0.672702	3.36661	0.328921	OK
MRPL24	963	-2.7621	15.0304	0.237166	OK
HDGF	8536	-0.178049	86.1193	0.730088	OK
PRCC	1392.5	-1.96313	1.49805	0.0219774	OK
SH2D2A	434.5	-3.23151	9.19247	0.370875	OK
NTRK1	39	N/A	0.945644	0.38553	OK
INSRR	7.5	N/A	0.244166	0.5	Low
PEAR1	1755	-3.04347	4.38291	0.0420602	OK
LRRC71	45.5	N/A	0.185189	0.0629808	OK
ARHGEF11	991.5	-1.83795	0.848687	0.0180251	OK
MIR765	5.5	N/A	0.144966	0.308664	Low
ETV3L	18	N/A	0.585999	0.5	OK
ETV3	446	-0.726004	12.4831	0.715575	OK
CYCSP52	3.5	N/A	0.0249222	0.101399	Low
FCRL5	37	N/A	1.29504	0.373792	OK
FCRL4	9.5	N/A	0.385055	0.408555	Low
FCRL3	109.5	N/A	3.51854	0.494616	OK
FCRL2	14.5	N/A	0.379477	0.413592	OK
FCRL1	4.5	4.44551	0.131233	#NUM!	Low
CD5L	38.5	N/A	1.61652	0.416935	OK
CD1D	51	N/A	1.39473	0.316879	OK
CD1A	14	N/A	0.794021	0.487213	OK
CD1C	26	N/A	0.866243	0.362207	OK
CD1B	3.5	N/A	0.210077	0.5	Low
CD1E	21.5	N/A	1.24419	0.491779	OK
OR10T2	0	N/A	0	#DIV/0!	Low
OR10K2	0	N/A	0	#DIV/0!	Low
OR10K1	1.5	N/A	0.0900332	0.5	Low
OR10R2	0	N/A	0	#DIV/0!	Low
OR6Y1	0	N/A	0	#DIV/0!	Low
OR6P1	0	N/A	0	#DIV/0!	Low
OR10X1	0	N/A	0	#DIV/0!	Low
OR10Z1	0	N/A	0	#DIV/0!	Low
SPTA1	6.5	N/A	0.204989	0.349408	Low
OR6K2	0	N/A	0	#DIV/0!	Low
OR6K3	0	N/A	0	#DIV/0!	Low
OR6K6	0	N/A	0	#DIV/0!	Low
OR6N1	0.5	N/A	0.0162778	0.5	Low
OR6N2	0.5	N/A	0.0162778	0.5	Low
MNDA	435	4.39723	19.2126	#NUM!	OK
PYHIN1	107	N/A	2.14106	0.320891	OK
IFI16	7435	0.791612	0.642009	#NUM!	OK
AIM2	46.5	4.28411	0.430299	#NUM!	OK
CADM3	81.5	-0.524261	4.52149	0.801547	OK
FCER1A	66.5	N/A	3.52858	0.471945	OK
OR10J3	0	N/A	0	#DIV/0!	Low
OR10J1	0	N/A	0	#DIV/0!	Low
OR10J5	0	N/A	0	#DIV/0!	Low
APCS	0	N/A	0	#DIV/0!	Low
CRP	21.5	N/A	0.283344	0.210956	OK
DUSP23	918	-2.31113	22.3278	0.35158	OK
FCRL6	71	N/A	0.552467	0.122596	OK
SLAMF8	244	0.481937	2.62033	#NUM!	OK
VSIG8	15	N/A	0.488333	0.5	OK
TAGLN2	34720	-1.43228	186.265	0.122333	OK
IGSF9	16	0.636744	0.4746	#NUM!	OK
SLAMF9	82	N/A	2.43811	0.463132	OK
PIGM	152.5	N/A	0.497364	0.0479909	OK
KCNJ10	18.5	N/A	0.231967	0.200466	OK
KCNJ9	0	N/A	0	#DIV/0!	Low
IGSF8	405.5	0.278588	4.66622	#NUM!	OK
ATP1A2	375.5	-1.94303	21.9828	0.589081	OK
ATP1A4	7	N/A	0.281288	0.406506	Low
CASQ1	17.5	N/A	0.338278	0.310209	OK
PEA15	19086.5	-1.1989	271.659	0.373064	OK
DCAF8	2389.5	-2.52408	14.5548	0.105644	OK
PEX19	1142	-0.418917	17.3035	0.579517	OK
COPA	4112.5	0.902422	47.0467	#NUM!	OK
SUMO1P3	14.5	N/A	0.0834108	0.0829082	OK
NCSTN	1334	1.29131	8.22926	#NUM!	OK
NHLH1	12	2.38201	0.442533	#NUM!	OK
VANGL2	324.5	-3.01011	1.02877	0.0556876	OK
SLAMF6	130	N/A	3.075	0.376701	OK
CD84	241.5	-3.47385	3.23328	0.233808	OK
SLAMF1	841.5	0.382591	4.91413	#NUM!	OK
CD48	860	2.91491	10.9172	#NUM!	OK
SLAMF7	1088.5	2.95091	25.1606	#NUM!	OK
LY9	190.5	N/A	3.0079	0.253527	OK
CD244	112.5	N/A	1.81094	0.258512	OK
ITLN1	17	N/A	0.187177	0.151209	OK
ITLN2	272.5	N/A	0.293808	0.0161341	OK
F11R	5579	-1.65662	87.1518	0.348136	OK
TSTD1	508.5	-0.605365	0.109494	0.00946074	OK
USF1	2031	-3.75768	14.1908	0.107425	OK
ARHGAP30	964.5	-4.13459	10.399	0.157005	OK
KLHDC9	38	N/A	0.938465	0.294403	OK
PFDN2	4550.5	-1.97052	65.5184	0.29997	OK
NIT1	817	-2.02402	2.29623	0.0571824	OK
DEDD	1726.5	-1.17645	20.3083	0.275308	OK
UFC1	2176	-1.5708	23.3107	0.217591	OK
USP21	504.5	-2.79297	5.88695	0.184698	OK
PPOX	256	N/A	4.99697	0.245856	OK
B4GALT3	2142	-4.70955	11.5489	0.0873184	OK
ADAMTS4	18469.5	0.112386	13.0611	#NUM!	OK
NDUFS2	5878	-2.43813	16.4359	0.052626	OK
FCER1G	4537.5	6.50648	47.2276	#NUM!	OK
APOA2	0	N/A	0	#DIV/0!	Low
TOMM40L	328	-1.92289	6.44865	0.322928	OK
MIR5187	0	N/A	0	#DIV/0!	Low
NR1I3	17	N/A	0.696354	0.411062	OK
PCP4L1	23.5	1.77571	0.0707224	#NUM!	OK
MPZ	143.5	1.34504	3.84543	#NUM!	OK
SDHC	942	-1.80116	12.4276	0.242837	OK
FCGR2A	2452.5	2.74519	32.6278	#NUM!	OK
HSPA6	18426.5	-2.79611	539.616	0.506431	OK
FCGR3A	1085	1.24215	9.06824	#NUM!	OK
FCGR2C	32	3.15917	0.162289	#NUM!	OK
HSPA7	1117.5	-2.0093	23.6514	0.42314	OK
FCGR3B	283.5	5.48637	15.535	#NUM!	OK
FCGR2B	283.5	2.50005	0.768896	#NUM!	OK
RPL31P11	4.5	N/A	0.223811	0.456904	Low
FCRLA	13	4.58357	0.330644	#NUM!	OK
FCRLB	27	N/A	0.138378	0.079758	OK
DUSP12	665.5	-1.70591	3.28904	0.110229	OK
ATF6	2315.5	-0.260401	34.139	0.744783	OK
OLFML2B	253.5	-3.99178	8.50373	0.382853	OK
NOS1AP	16	N/A	0.0580001	0.0559521	OK
MIR4654	0	N/A	0	#DIV/0!	Low
MIR556	0	N/A	0	#DIV/0!	Low
C1orf226	91	N/A	0.509109	0.0807427	OK
SH2D1B	87	N/A	2.46202	0.443583	OK
UHMK1	1148.5	-0.476929	8.15819	0.329498	OK
UAP1	3887.5	-1.44637	26.298	0.165371	OK
DDR2	142.5	N/A	2.23214	0.251494	OK
HSD17B7	188.5	N/A	1.45465	0.109303	OK
RGS4	85	3.18346	0.241554	#NUM!	OK
RGS5	5211.5	-1.27154	246.011	0.612208	OK
NUF2	19	N/A	0.538666	0.324991	OK
PBX1	863.5	-2.60752	30.814	0.432835	OK
LOC100505795	0	N/A	0	#DIV/0!	Low
LMX1A	1.5	N/A	0.00254446	0.0258758	Low
RXRG	69	N/A	3.77122	0.478759	OK
LOC400794	7	N/A	0.327577	0.442606	Low
LRRC52	0	N/A	0	#DIV/0!	Low
MGST3	2009.5	-1.70368	42.6178	0.358316	OK
ALDH9A1	1556.5	-0.716174	8.66961	0.199758	OK
LOC440700	2.5	N/A	0.0574777	0.279114	Low
TMCO1	1468.5	0.810936	4.52773	#NUM!	OK
UCK2	2459.5	N/A	35.0776	0.228672	OK
MIR3658	0	N/A	0	#DIV/0!	Low
FAM78B	12	N/A	0.211088	0.226082	OK
MIR921	0	N/A	0	#DIV/0!	Low
FMO9P	0	N/A	0	#DIV/0!	Low
POGK	1535.5	-0.19827	15.9667	0.713452	OK
TADA1	196	-0.942514	0.96509	0.157087	OK
ILDR2	18	N/A	0.339777	0.23937	OK
MAEL	12	N/A	0.720266	0.5	OK
GPA33	103.5	N/A	5.93456	0.489694	OK
DUSP27	6.5	N/A	0.343855	0.471245	Low
POU2F1	895	-1.71859	7.47402	0.186644	OK
CD247	656.5	-2.79153	15.818	0.430763	OK
CREG1	7154	0.0241688	136.251	#NUM!	OK
RCSD1	2250.5	-1.00231	50.8161	0.575253	OK
MPZL1	10312.5	-2.86281	264.861	0.452445	OK
ADCY10	40.5	N/A	1.17963	0.454932	OK
MPC2	3714	-1.83437	78.8347	0.437732	OK
DCAF6	1900.5	-2.92316	15.3978	0.146588	OK
GPR161	733.5	-4.07894	9.66881	0.223241	OK
TIPRL	1519.5	0.81281	16.8345	#NUM!	OK
SFT2D2	129	N/A	2.3944	0.29804	OK
ANKRD36BP1	14	N/A	0.0854667	0.0954688	OK
TBX19	155.5	-0.541954	1.72959	0.470969	OK
MIR557	0	N/A	0	#DIV/0!	Low
LOC100505918	6	N/A	0.360133	0.5	Low
XCL2	29	N/A	0.074244	0.0378814	OK
XCL1	46	N/A	1.17353	0.404073	OK
DPT	891	-4.87822	38.0193	0.43148	OK
LINC00626	0	N/A	0	#DIV/0!	Low
ATP1B1	1491.5	1.14094	36.8918	#NUM!	OK
NME7	213.5	-0.523699	2.18285	0.45115	OK
BLZF1	353	0.991363	6.5392	#NUM!	OK
SLC19A2	1345	-2.76012	20.5502	0.28267	OK
F5	43.5	4.65732	0.250233	#NUM!	OK
SELP	2069	-2.88558	99.0047	0.493897	OK
SELL	477	8.40684	9.65214	#NUM!	OK
SELE	4876.5	0.614577	232.06	#NUM!	OK
METTL18	137.5	0.202003	0.0789458	#NUM!	OK
C1orf112	63	N/A	0.217155	0.0506449	OK
SCYL3	193.5	0.44911	1.1993	#NUM!	OK
KIFAP3	701.5	-0.30262	0.399292	0.0451078	OK
METTL11B	0	N/A	0	#DIV/0!	Low
MIR3119-2	0	N/A	0	#DIV/0!	Low
MIR3119-1	0	N/A	0	#DIV/0!	Low
GORAB	384	-2.06817	7.64099	0.397098	OK
PRRX1	3521.5	-2.69918	82.5661	0.42409	OK
MROH9	19	N/A	0.340822	0.288113	OK
FMO3	233	N/A	11.3467	0.451969	OK
MIR1295A	0	N/A	0	#DIV/0!	Low
MIR1295B	0	N/A	0	#DIV/0!	Low
FMO6P	1	N/A	0.0600221	0.5	Low
FMO2	1319.5	-2.7693	41.4738	0.395027	OK
FMO1	16	N/A	0.72891	0.43627	OK
FMO4	59	0.139053	1.78233	#NUM!	OK
TOP1P1	19.5	N/A	0.105789	0.0784096	OK
PRRC2C	7855	-1.00481	116.903	0.42363	OK
MYOC	127.5	N/A	6.95849	0.478427	OK
VAMP4	652.5	-1.77522	3.05916	0.0959651	OK
METTL13	773.5	-0.7459	1.99099	0.0971638	OK
DNM3	138	N/A	5.04284	0.383968	OK
DNM3OS	264.5	-3.68414	1.62132	0.103822	OK
MIR214	0	N/A	0	#DIV/0!	Low
MIR3120	0	N/A	0	#DIV/0!	Low
MIR199A2	0	N/A	0	#DIV/0!	Low
C1orf105	0.5	N/A	0.0300111	0.5	Low
PIGC	387.5	0.326952	2.93778	#NUM!	OK
SUCO	891.5	-1.65288	12.313	0.310912	OK
FASLG	47	N/A	1.43753	0.474498	OK
TNFSF18	3	N/A	0.0513777	0.275102	Low
TNFSF4	45.5	-1.19798	0.0463226	0.0273959	OK
LOC100506023	23	N/A	0.639888	0.320735	OK
PRDX6	7033.5	0.162645	55.5119	#NUM!	OK
SLC9C2	3	N/A	0.133778	0.431209	Low
ANKRD45	14	1.21387	0.42371	#NUM!	OK
KLHL20	356	-1.99088	5.02792	0.245887	OK
CENPL	81	0.395857	0.878022	#NUM!	OK
DARS2	217	-1.45424	0.167513	0.0184264	OK
GAS5-AS1	12	N/A	0.0203557	0.0258758	OK
GAS5	8330	-2.57016	103.715	0.235996	OK
SNORD81	76	0.448314	1.50662	#NUM!	OK
SNORD47	120.5	N/A	0.891098	0.105048	OK
SNORD80	175	N/A	2.27184	0.207731	OK
SNORD79	26	N/A	0.357066	0.183611	OK
SNORD78	43.5	N/A	0.389099	0.125273	OK
SNORD44	57	N/A	0.420711	0.116094	OK
SNORD77	20	N/A	0.188222	0.149186	OK
SNORD76	48.5	N/A	0.653166	0.21568	OK
SNORD75	0.5	N/A	0.0300111	0.5	Low
SNORD74	15.5	N/A	0.319455	0.330255	OK
ZBTB37	42	N/A	0.0712448	0.0258758	OK
SERPINC1	5.5	N/A	0.0864777	0.252452	Low
RC3H1	1176.5	0.0409683	4.00155	#NUM!	OK
RABGAP1L	718.5	2.1559	7.15948	#NUM!	OK
GPR52	1	N/A	0.0325555	0.5	Low
CACYBP	1387.5	-1.3781	15.3608	0.275626	OK
MRPS14	510.5	0.138906	1.15532	#NUM!	OK
TNN	7.5	N/A	0.3113	0.414199	Low
KIAA0040	4583	-1.64751	120.338	0.418251	OK
TNR	12	N/A	0.673977	0.48499	OK
SCARNA3	0.5	N/A	0.0162778	0.5	Low
PAPPA2	7	N/A	0.420155	0.5	Low
ASTN1	9.5	N/A	0.431344	0.435479	Low
MIR488	0	N/A	0	#DIV/0!	Low
SEC16B	76	N/A	3.54333	0.441728	OK
RASAL2-AS1	40	N/A	0.0401551	0.0150303	OK
RASAL2	1538	-1.37311	15.6315	0.254393	OK
TEX35	0	N/A	0	#DIV/0!	Low
C1orf220	3	N/A	0.133778	0.431209	Low
MIR4424	0	N/A	0	#DIV/0!	Low
RALGPS2	121.5	1.14333	1.73803	#NUM!	OK
ANGPTL1	159	0.162397	4.91464	#NUM!	OK
FAM20B	1277	-3.75616	7.58533	0.092211	OK
TOR3A	1016	-1.9001	33.2092	0.452204	OK
ABL2	3424.5	-2.60404	44.3676	0.244497	OK
SOAT1	1277	0.12802	15.0499	#NUM!	OK
AXDND1	7	N/A	0.420155	0.5	Low
NPHS2	1.5	N/A	0.0437444	0.331406	Low
TDRD5	1	N/A	0.0600221	0.5	Low
FAM163A	4	N/A	0.130222	0.5	Low
TOR1AIP2	1571	-0.259478	15.5949	0.63254	OK
TOR1AIP1	1355.5	0.186484	5.75557	#NUM!	OK
CEP350	886	-1.39751	7.96793	0.223667	OK
QSOX1	6789.5	-3.37999	91.0104	0.235522	OK
FLJ23867	410.5	N/A	0.291162	0.0106424	OK
LHX4	15.5	N/A	0.365744	0.375842	OK
ACBD6	582	-3.03807	9.24258	0.234148	OK
MIR3121	0	N/A	0	#DIV/0!	Low
XPR1	1066.5	0.415954	13.1499	#NUM!	OK
KIAA1614	45.5	N/A	0.23141	0.073721	OK
STX6	2168.5	-1.30944	44.6749	0.485892	OK
MR1	522.5	0.987307	0.85546	#NUM!	OK
IER5	2620	-1.03866	38.9604	0.416324	OK
CACNA1E	3.5	N/A	0.0676555	0.310209	Low
ZNF648	0	N/A	0	#DIV/0!	Low
GLUL	17107.5	0.292107	515.337	#NUM!	OK
TEDDM1	5.5	N/A	0.0986776	0.229748	Low
LINC00272	0	N/A	0	#DIV/0!	Low
RGSL1	0	N/A	0	#DIV/0!	Low
RNASEL	161	0.653638	2.02591	#NUM!	OK
RGS16	4112.5	-1.4331	50.3449	0.255336	OK
RGS8	0	N/A	0	#DIV/0!	Low
NPL	409.5	1.01619	2.68445	#NUM!	OK
DHX9	3974	-3.3454	52.8602	0.234251	OK
SHCBP1L	0	N/A	0	#DIV/0!	Low
LAMC1	5184	-1.50745	68.5062	0.311421	OK
LAMC2	8745.5	-0.239062	275.503	0.899416	OK
NMNAT2	79	N/A	2.28844	0.329876	OK
SMG7-AS1	22	2.13417	0.577355	#NUM!	OK
SMG7	2500.5	0.383062	24.9327	#NUM!	OK
NCF2	1419.5	1.45697	34.7929	#NUM!	OK
ARPC5	4782	0.922404	35.0757	#NUM!	OK
RGL1	950.5	1.07625	8.26261	#NUM!	OK
APOBEC4	3.5	N/A	0.113944	0.5	Low
TSEN15	487	-1.35331	2.29068	0.111663	OK
C1orf21	1562.5	-2.29022	10.6498	0.121789	OK
EDEM3	730.5	-0.654265	6.93268	0.371682	OK
FAM129A	1463	1.42542	4.63136	#NUM!	OK
RNF2	450	-0.6479	2.5686	0.236375	OK
TRMT1L	297.5	1.65195	0.427503	#NUM!	OK
SWT1	159	N/A	0.454868	0.043958	OK
IVNS1ABP	6392.5	1.32618	79.3357	#NUM!	OK
HMCN1	217	-1.70695	5.71117	0.413097	OK
MIR548F1	0	N/A	0	#DIV/0!	Low
PRG4	59	0.635127	0.62511	#NUM!	OK
TPR	2078.5	-3.61969	20.2206	0.167453	OK
OCLM	6.5	N/A	0.165322	0.402948	Low
PDC	0.5	N/A	0.0162778	0.5	Low
PTGS2	16709.5	-0.478486	507.696	0.809539	OK
PLA2G4A	272	-3.55377	5.80004	0.3667	OK
RGS18	37	3.98216	1.29504	#NUM!	OK
RGS21	0	N/A	0	#DIV/0!	Low
RGS1	949	-0.34289	7.10794	0.428306	OK
RGS13	72	1.86466	0.52591	#NUM!	OK
RGS2	6410	-1.85268	59.3777	0.176695	OK
UCHL5	551.5	-3.2246	0.0982718	0.00300535	OK
TROVE2	500	-1.57362	4.42782	0.206863	OK
GLRX2	279	0.0841216	2.69513	#NUM!	OK
CDC73	1056.5	-1.39313	10.5099	0.247238	OK
MIR1278	0	N/A	0	#DIV/0!	Low
B3GALT2	37.5	N/A	0.214122	0.0823249	OK
KCNT2	54.5	-0.0819535	1.14192	0.919177	OK
MIR4735	0	N/A	0	#DIV/0!	Low
CFH	2204.5	-1.09871	58.3492	0.497355	OK
CFHR3	4	N/A	0.0549332	0.183611	Low
CFHR1	7	N/A	0.420155	0.5	Low
CFHR4	2	N/A	0.120044	0.5	Low
CFHR2	0	N/A	0	#DIV/0!	Low
CFHR5	0	N/A	0	#DIV/0!	Low
F13B	6.5	N/A	0.390144	0.5	Low
ASPM	16	N/A	0.243155	0.24391	OK
ZBTB41	150	N/A	0.439887	0.0432654	OK
CRB1	2.5	N/A	0.0574777	0.279114	Low
DENND1B	140	N/A	1.22833	0.123073	OK
C1orf53	14	N/A	0.701443	0.458623	OK
LHX9	14	N/A	0.42371	0.339901	OK
NEK7	1040	-4.26304	13.4031	0.182808	OK
ATP6V1G3	0	N/A	0	#DIV/0!	Low
PTPRC	1865	1.98208	41.9691	#NUM!	OK
MIR181B1	1	N/A	0.0325555	0.5	Low
MIR181A1	0	N/A	0	#DIV/0!	Low
NR5A2	254	N/A	7.4691	0.3333	OK
ZNF281	366	-0.389771	8.02706	0.765785	OK
KIF14	10	1.8446	0.137333	#NUM!	OK
DDX59	498.5	-1.01642	2.74949	0.155206	OK
CAMSAP2	1384	-2.81141	0.249259	0.00317121	OK
GPR25	4	N/A	0.147511	0.386131	Low
KIF21B	617	-4.75524	12.1251	0.325417	OK
CACNA1S	7.5	N/A	0.265011	0.376028	Low
ASCL5	0	N/A	0	#DIV/0!	Low
TMEM9	681	-1.81787	11.7594	0.299843	OK
IGFN1	289	N/A	8.62164	0.464469	OK
PKP1	429.5	-3.19443	9.8166	0.399	OK
TNNT2	357	-4.42621	9.43909	0.322045	OK
LAD1	477.5	0.138225	11.9347	#NUM!	OK
TNNI1	12	N/A	0.298089	0.39428	OK
PHLDA3	561	N/A	9.55594	0.220193	OK
CSRP1	12358.5	-1.56976	370.732	0.461214	OK
RPS10P7	6	N/A	0.221266	0.386131	Low
NAV1	3762.5	-1.74706	93.3282	0.504307	OK
MIR5191	1	N/A	0.0325555	0.5	Low
MIR1231	0	N/A	0	#DIV/0!	Low
IPO9	1397.5	-0.485663	6.61373	0.245365	OK
SHISA4	109	N/A	2.65415	0.291351	OK
LMOD1	1748	N/A	100.614	0.490564	OK
TIMM17A	2590	-0.884968	37.3819	0.440984	OK
RNPEP	1017	-3.01706	14.0593	0.208957	OK
ELF3	5756	-2.54992	162.718	0.50247	OK
GPR37L1	15	3.35236	0.488333	#NUM!	OK
ARL8A	1386	0.615006	5.12841	#NUM!	OK
PTPN7	316.5	-1.03681	4.79545	0.423154	OK
PTPRVP	2	N/A	0.0737554	0.386131	Low
LGR6	142	N/A	4.91261	0.371049	OK
UBE2T	44.5	N/A	0.0137671	0.00467564	OK
PPP1R12B	1531.5	-2.55228	61.4658	0.464396	OK
SYT2	23	N/A	0.639888	0.320735	OK
KDM5B	1996.5	-1.79331	41.2972	0.431813	OK
LOC148709	5.5	N/A	0.00609993	0.0165925	Low
RABIF	330.5	0.865723	0.90008	#NUM!	OK
KLHL12	549.5	0.27516	5.16258	#NUM!	OK
ADIPOR1	3703	0.151627	4.78474	#NUM!	OK
CYB5R1	1057.5	N/A	1.40009	0.0197757	OK
TMEM183A	72	N/A	0.0167325	0.00349894	OK
TMEM183B	0	N/A	0	#DIV/0!	Low
PPFIA4	129	N/A	1.93151	0.240261	OK
MYOG	0.5	N/A	0.0300111	0.5	Low
ADORA1	34	N/A	1.25384	0.386131	OK
MYBPH	9.5	N/A	0.0610332	0.0920537	Low
CHI3L1	647.5	4.55482	17.7469	#NUM!	OK
CHIT1	877	2.40213	16.655	#NUM!	OK
BTG2	7473	-2.99534	232.515	0.385161	OK
FMOD	1917.5	-0.975428	19.1357	0.268952	OK
PRELP	2220	-2.58155	103.393	0.499332	OK
OPTC	2	N/A	0.120044	0.5	Low
ATP2B4	6728.5	-1.67147	109.53	0.360029	OK
SNORA77	7	N/A	0.188711	0.313677	Low
LINC00260	16.5	N/A	0.259433	0.252452	OK
LAX1	46	N/A	0.155178	0.0519932	OK
ZC3H11A	5073	-3.25446	80.1216	0.279762	OK
ZBED6	115.5	-0.187961	3.66759	0.920111	OK
SNRPE	1687	-0.414616	8.49347	0.292611	OK
LINC00303	1	N/A	0.0137333	0.183611	Low
SOX13	840	-3.71088	27.2279	0.378905	OK
ETNK2	129.5	N/A	0.92212	0.101399	OK
REN	105.5	N/A	3.43461	0.5	OK
KISS1	14	N/A	0.455777	0.5	OK
GOLT1A	370	-3.89764	10.8883	0.481022	OK
PLEKHA6	144.5	-0.0593268	2.79452	0.936615	OK
LINC00628	5	N/A	0.162778	0.5	Low
PPP1R15B	4887	-0.616418	94.0168	0.628691	OK
PIK3C2B	3493	-2.92453	50.3007	0.262342	OK
MDM4	865.5	-1.6156	2.94939	0.0777674	OK
LRRN2	19.5	0.827267	0.383522	#NUM!	OK
NFASC	635.5	-3.39761	27.6828	0.456846	OK
CNTN2	8.5	N/A	0.139878	0.214001	Low
TMEM81	138.5	N/A	1.63903	0.18891	OK
RBBP5	478.5	-1.48596	5.3017	0.265305	OK
DSTYK	433.5	N/A	1.15195	0.0407809	OK
TMCC2	648	-3.13407	18.4112	0.483376	OK
NUAK2	1593.5	0.427102	49.6091	#NUM!	OK
KLHDC8A	0.5	N/A	0.0162778	0.5	Low
LEMD1-AS1	3	N/A	0.180066	0.5	Low
LEMD1	0.5	N/A	0.0162778	0.5	Low
MIR135B	0	N/A	0	#DIV/0!	Low
CDK18	666	N/A	8.02677	0.192487	OK
LOC284578	30.5	N/A	1.27521	0.415929	OK
ELK4	1573.5	-0.671015	18.6851	0.439208	OK
SLC45A3	80.5	-0.912299	0.908033	0.35297	OK
NUCKS1	4482	-1.94987	55.0259	0.220678	OK
SLC41A1	4629	-1.76642	105.799	0.471265	OK
PM20D1	28	N/A	0.124645	0.0690293	OK
LOC284581	1.5	N/A	0.0488333	0.5	Low
SLC26A9	205	-0.528848	4.91491	0.731168	OK
FAM72A	8	3.11399	0.156155	#NUM!	Low
AVPR1B	0.5	N/A	0.0162778	0.5	Low
CTSE	961.5	2.9341	24.2662	#NUM!	OK
SRGAP2C	5.5	N/A	0.283833	0.465504	Low
SRGAP2B	0	N/A	0	#DIV/0!	Low
SRGAP2	857	N/A	0.937856	0.0163739	OK
IKBKE	194.5	-0.230419	1.37914	0.557085	OK
RASSF5	2075	-0.902937	33.299	0.47385	OK
EIF2D	706	-3.40332	18.1203	0.329258	OK
DYRK3	1024.5	N/A	24.1417	0.375362	OK
MAPKAPK2	4915.5	-4.08559	14.1119	0.0450196	OK
IL10	441	1.5026	12.3203	#NUM!	OK
IL19	50	N/A	1.35004	0.425424	OK
IL20	8.5	4.17179	0.276722	#NUM!	Low
IL24	1065.5	-3.13079	28.9018	0.465194	OK
PIGR	1181.5	1.64569	17.6807	#NUM!	OK
FCAMR	128.5	N/A	4.18338	0.5	OK
C1orf116	1048.5	-2.75535	2.15597	0.035844	OK
YOD1	476.5	0.647816	12.3651	#NUM!	OK
PFKFB2	448	-2.42035	3.75329	0.161531	OK
C4BPB	16.5	N/A	0.537166	0.5	OK
C4BPA	799	-0.395334	7.91785	0.471977	OK
CD55	8090.5	1.67732	140.262	#NUM!	OK
CR2	17.5	N/A	0.2457	0.225045	OK
CR1	60.5	2.8576	0.668854	#NUM!	OK
CR1L	69	N/A	2.24633	0.5	OK
CD46	2921	-1.02756	1.32495	0.0133823	OK
MIR29C	161	N/A	1.95493	0.193967	OK
MIR29B2	40	N/A	0.422733	0.168143	OK
LOC148696	36	N/A	1.172	0.5	OK
CD34	3624.5	-5.69299	208.987	0.49717	OK
PLXNA2	3198.5	N/A	15.6246	0.0759257	OK
MIR205HG	18.5	N/A	0.463411	0.397335	OK
MIR205	0	N/A	0	#DIV/0!	Low
CAMK1G	203.5	2.13988	6.06958	#NUM!	OK
LAMB3	7242.5	-2.18999	225.091	0.559368	OK
MIR4260	4	N/A	0.130222	0.5	Low
G0S2	19536.5	0.741465	452.069	#NUM!	OK
HSD11B1	716	0.131557	17.4774	#NUM!	OK
TRAF3IP3	310	-0.80989	4.81529	0.487519	OK
C1orf74	43	N/A	0.566689	0.210956	OK
IRF6	640.5	-1.20145	13.8159	0.520235	OK
SYT14	0.5	N/A	0.0300111	0.5	Low
SERTAD4-AS1	116	N/A	1.22275	0.145417	OK
SERTAD4	42.5	N/A	1.02341	0.288956	OK
HHAT	70	N/A	2.81288	0.406506	OK
KCNH1	21.5	N/A	1.05903	0.454643	OK
RCOR3	565.5	-1.65531	7.78933	0.261676	OK
TRAF5	681	N/A	3.28447	0.074938	OK
LINC00467	48.5	-0.0110031	1.5687	0.992252	OK
RD3	2	4.37666	0.120044	#NUM!	Low
SLC30A1	191.5	-2.30921	0.523786	0.0505933	OK
NEK2	10	N/A	0.2762	0.319102	OK
LPGAT1	1087.5	-0.0844501	3.2334	0.574199	OK
INTS7	231.5	N/A	0.96359	0.064442	OK
DTL	18.5	N/A	0.139389	0.118588	OK
MIR3122	0	N/A	0	#DIV/0!	Low
PPP2R5A	1766.5	-1.49389	24.8385	0.279707	OK
SNORA16B	0	N/A	0	#DIV/0!	Low
TMEM206	178.5	1.23332	2.7561	#NUM!	OK
NENF	1965	-2.482	49.112	0.350274	OK
ATF3	18607.5	-1.77806	322.212	0.371058	OK
FAM71A	135	N/A	1.20107	0.140778	OK
BATF3	744	-1.11836	9.7084	0.307742	OK
NSL1	460.5	-0.214111	5.97702	0.710202	OK
TATDN3	161	-1.21661	3.13684	0.394135	OK
FLVCR1	317.5	-2.98535	0.80088	0.0442525	OK
VASH2	119	N/A	0.19931	0.0249515	OK
ANGEL2	427.5	-0.998766	6.35702	0.361711	OK
RPS6KC1	538	0.652391	5.24833	#NUM!	OK
LINC00538	0	N/A	0	#DIV/0!	Low
PROX1	62.5	N/A	1.11292	0.228344	OK
SMYD2	452.5	-2.10809	8.08902	0.289959	OK
PTPN14	774.5	-0.970676	5.10493	0.188293	OK
CENPF	23.5	-0.09636	0.348455	0.896037	OK
KCNK2	12.5	N/A	0.657699	0.469996	OK
KCTD3	714	-5.4162	18.045	0.30556	OK
USH2A	24	N/A	1.30166	0.47699	OK
ESRRG	16	N/A	0.914065	0.488863	OK
GPATCH2	140	0.819448	0.719153	#NUM!	OK
SPATA17	22.5	N/A	0.269611	0.191347	OK
LINC00210	0	N/A	0	#DIV/0!	Low
RRP15	752.5	0.0789577	3.62177	#NUM!	OK
TGFB2	693	N/A	11.6831	0.270804	OK
LYPLAL1	229.5	0.530739	4.19329	#NUM!	OK
RNU5F-1	0	N/A	0	#DIV/0!	Low
SLC30A10	2	N/A	0.0737554	0.386131	Low
EPRS	980	-1.57591	5.79751	0.137871	OK
BPNT1	174.5	0.0851008	4.22487	#NUM!	OK
IARS2	1125	-2.97612	5.75032	0.0909717	OK
MIR215	0	N/A	0	#DIV/0!	Low
MIR194-1	0	N/A	0	#DIV/0!	Low
RAB3GAP2	756	-2.40315	3.82829	0.0968895	OK
SNORA36B	0	N/A	0	#DIV/0!	Low
MARK1	156.5	N/A	1.47807	0.131655	OK
C1orf115	1384	-2.11634	46.0396	0.441087	OK
43892	425.5	-1.48208	2.07098	0.109453	OK
43891	96	N/A	2.75335	0.327614	OK
HLX	1066.5	-1.70446	5.65108	0.118357	OK
C1orf140	4.5	N/A	0.0849443	0.23937	Low
DUSP10	621.5	N/A	13.8917	0.357062	OK
HHIPL2	3	N/A	0.0976666	0.5	Low
TAF1A	203	N/A	4.66464	0.366559	OK
MIA3	1132	1.42857	12.2272	#NUM!	OK
AIDA	725.5	9.50301e-05	2.37246	#NUM!	OK
BROX	112	0.650376	1.6558	#NUM!	OK
FAM177B	8	N/A	0.295022	0.386131	Low
DISP1	378.5	N/A	8.36884	0.270955	OK
TLR5	41.5	N/A	1.05596	0.300905	OK
SUSD4	56.5	N/A	3.02094	0.473707	OK
CAPN8	463	-4.2611	12.157	0.431381	OK
CAPN2	11211.5	-0.724733	141.375	0.441027	OK
TP53BP2	4156	-2.83711	90.8172	0.393509	OK
FBXO28	1031	-0.0723306	8.24476	0.847866	OK
DEGS1	2708.5	-1.24108	47.6276	0.438689	OK
NVL	355	-1.84277	0.262737	0.0155535	OK
MIR320B2	0	N/A	0	#DIV/0!	Low
CNIH4	899.5	0.136223	13.2678	#NUM!	OK
WDR26	3036.5	-1.07037	31.9675	0.302334	OK
MIR4742	0	N/A	0	#DIV/0!	Low
CNIH3	36.5	N/A	1.03359	0.324725	OK
DNAH14	67	1.85674	1.024	#NUM!	OK
LBR	1112	-2.02303	10.1874	0.190005	OK
ENAH	1638	-1.03369	36.5207	0.463919	OK
SRP9	2097.5	0.239824	17.1177	#NUM!	OK
EPHX1	2142.5	-2.30064	95.4546	0.502666	OK
TMEM63A	654	-2.17802	4.30331	0.131645	OK
LEFTY1	4	N/A	0.0376444	0.149186	Low
PYCR2	1404.5	N/A	2.87904	0.030451	OK
LEFTY2	26.5	N/A	0.340788	0.173439	OK
SDE2	689.5	-3.07731	3.5149	0.0898492	OK
H3F3A	0	N/A	0	#DIV/0!	Low
H3F3AP4	0	N/A	0	#DIV/0!	Low
ACBD3	1138.5	-1.01685	8.92086	0.235822	OK
MIXL1	0	N/A	0	#DIV/0!	Low
LIN9	31.5	N/A	0.284878	0.143179	OK
PARP1	1718.5	-0.057423	11.2779	0.850394	OK
ITPKB	3434	-5.72937	42.6864	0.20226	OK
PSEN2	385.5	-4.35527	2.49371	0.0973387	OK
CDC42BPA	1303.5	-2.65895	9.17592	0.118786	OK
ZNF678	110.5	0.485109	0.290876	#NUM!	OK
ZNF847P	0	N/A	0	#DIV/0!	Low
JMJD4	95	0.241428	0.702909	#NUM!	OK
SNAP47	404	0.130527	1.38226	#NUM!	OK
[truncated: 19,798 more rows]

## Sheet: GSE153970_HAE_mockVsCoV2_pfilte
	overallMean	Mock_HAE	SARS2	log2fc	stat	pval	pval.adjust
TSPAN6	2540.17	2683.67	2396.67	-0.163176	1.94752	0.0514722	0.205446
DPM1	731.5	666.667	796.333	0.256407	2.05446	0.0399313	0.172076
SCYL3	182.167	180.667	183.667	0.0237595	0.252761	0.800453	0.932026
C1orf112	90.5	80	101	0.336283	2.31853	0.0204203	0.105096
FGR	8.833	9	8.667	-0.0544478	0.137361	0.890746	0.984835
CFH	1533	1546.67	1519.33	-0.0257239	0.157159	0.87512	0.976558
FUCA2	1574.33	1632.67	1516	-0.106961	0.914223	0.3606	0.644736
GCLC	981.833	1153.33	810.333	-0.509222	3.90566	9.39695e-05	0.00125817
NFYA	706.5	748	665	-0.169684	3.16297	0.00156168	0.0138636
STPG1	454.333	441	467.667	0.0847019	0.883252	0.3771	0.662062
NIPAL3	3554	3621	3487	-0.0544018	0.957196	0.338469	0.619704
LAS1L	1004	1009	999	-0.0143696	0.154626	0.877116	0.978004
ENPP4	167.333	155.333	179.333	0.207276	0.893568	0.371553	0.656101
SEMA3F	4850.5	5078.33	4622.67	-0.13563	3.22056	0.00127939	0.0117195
CFTR	50.833	36.333	65.333	0.846526	3.36919	0.000753906	0.00751595
ANKIB1	669.5	676	663	-0.0280144	0.29001	0.771808	0.919573
CYP51A1	186	189.333	182.667	-0.051715	0.233508	0.815367	0.941536
KRIT1	42.667	41.667	43.667	0.0676387	0.372342	0.709639	0.883021
RAD52	95.167	91	99.333	0.126411	0.968103	0.332993	0.612766
MYH16	269	228	310	0.443234	2.18106	0.0291789	0.136877
BAD	976	989.333	962.667	-0.0394203	0.792427	0.428112	0.711789
LAP3	1023.5	1000	1047	0.0662614	1.04618	0.29548	0.585417
CD99	2353.5	2176.67	2530.33	0.217207	2.61443	0.00893762	0.0562231
HS3ST1	1119	931.333	1306.67	0.488522	4.81981	1.43697e-06	3.16665e-05
AOC1	1.167	1.333	1	-0.415037	0.377964	0.705457	0.879883
WNT16	1.333	1	1.667	0.736966	0.557515	0.577176	0.813469
MAD1L1	3.167	4.333	2	-1.11548	1.32875	0.183932	0.432943
LASP1	4359	4096.67	4621.33	0.173859	3.05859	0.00222382	0.0184713
SNX11	737.5	716	759	0.0841403	0.812466	0.416524	0.700284
TMEM176A	0.667	1.333	0	#NAME?	1.74401	0.0811575	0.272284
M6PR	2390.5	2517.33	2263.67	-0.153235	4.12956	3.63455e-05	0.000551741
KLHL13	196.333	236.333	156.333	-0.596198	2.76193	0.00574613	0.0400734
CYP26B1	40	54.667	25.333	-1.10962	2.9748	0.00293178	0.0233118
ICA1	437.833	406.333	469.333	0.207949	2.12136	0.0338911	0.152418
DBNDD1	1066.5	960.333	1172.67	0.288186	1.18283	0.236878	0.506453
ALS2	675.333	767	583.667	-0.394082	2.74049	0.00613472	0.0420502
CASP10	166	160.333	171.667	0.0985355	1.07733	0.281332	0.566216
CFLAR	3192	2885.67	3498.33	0.277763	3.81382	0.000136836	0.00174497
TFPI	1116.5	1273	960	-0.407126	2.55618	0.0105828	0.0640775
NDUFAF7	226.5	230.333	222.667	-0.0488376	0.512976	0.607968	0.839829
RBM5	714.667	731	698.333	-0.0659556	1.12742	0.259566	0.536683
MTMR7	6.167	2.333	10	2.09954	3.39116	0.000695962	0.00703996
SLC7A2	79	58.333	99.667	0.772791	1.03356	0.301341	0.593407
ARF5	2766.83	2667.67	2866	0.10346	1.01467	0.310262	0.595537
SARM1	15	17	13	-0.387023	1.26491	0.205903	0.467431
POLDIP2	3634.5	3817.33	3451.67	-0.145272	1.63014	0.103072	0.314463
PLXND1	53.5	73	34	-1.10236	2.56747	0.0102443	0.062421
AK2	2876.67	2728.67	3024.67	0.14858	3.97927	6.91274e-05	0.000965544
CD38	7	11.333	2.667	-2.08746	3.97913	6.91677e-05	0.000965544
FKBP4	2095.67	2277	1914.33	-0.250292	1.60343	0.10884	0.325425
KDM1A	4153.33	4152	4154.67	0.000926289	0.0240751	0.980793	1
RBM6	787.5	816.667	758.333	-0.106915	2.04969	0.0403949	0.173629
CAMKK1	34.667	43	26.333	-0.707447	1.74472	0.0810344	0.272284
RECQL	905.833	841.333	970.333	0.205803	1.92812	0.0538397	0.211637
VPS50	507	479.333	534.667	0.15761	1.66863	0.0951916	0.300064
HSPB6	0.833	1.333	0.333	-2	1.199	0.230529	0.497897
ARHGAP33	0.5	0	1	Inf	1.73205	0.0832645	0.272284
NDUFAB1	1809	1763.33	1854.67	0.0728547	1.27845	0.201092	0.461055
PDK4	359	566.333	151.667	-1.90075	5.36862	7.93434e-08	2.34049e-06
ZMYND10	8.667	8.667	8.667	0	0	1	1
SLC25A13	525.333	493.333	557.333	0.175978	0.711809	0.476583	0.75503
ST7	649.333	623.667	675	0.114112	1.66472	0.0959683	0.301279
CDC27	819.833	792.333	847.333	0.0968221	1.73397	0.0829239	0.272284
HCCS	1590.5	1582.33	1598.67	0.0148156	0.207515	0.835608	0.953582
DVL2	745.667	864.333	627	-0.463122	6.00182	1.95118e-09	7.66491e-08
PRSS22_ENSG00000005001	3381.67	3025.33	3738	0.305172	2.61681	0.00887551	0.0559767
UPF1	2591	2844.67	2337.33	-0.283396	1.60088	0.109404	0.326391
SKAP2	1267.33	1192.33	1342.33	0.170955	1.3969	0.162445	0.4013
SLC25A5	4437.17	4772.33	4102	-0.218367	3.96752	7.26259e-05	0.0010068
MCUB	377.833	335	420.667	0.328516	4.22929	2.34431e-05	0.000372084
HOXA11	20.167	17	23.333	0.456858	0.741988	0.458094	0.738466
POLR2J	880.333	844.667	916	0.116965	2.59876	0.009356	0.0581799
DHX33	63	70.667	55.333	-0.352881	1.80299	0.0713902	0.257361
MEOX1	2.333	4	0.667	-2.58496	2.67261	0.00752632	0.0493826
THSD7A	241.333	303.667	179	-0.762529	3.43984	0.000582053	0.0060345
LIG3	506	519	493	-0.0741469	0.383502	0.701348	0.879883
RPAP3	385.5	400.667	370.333	-0.113578	0.872316	0.383036	0.668462
ACSM3	4.5	6	3	-1	1.64317	0.100348	0.31099
REXO5	29.667	26	33.333	0.358454	1.47214	0.140984	0.387177
CIAPIN1	2090.5	1974.33	2206.67	0.160503	2.14121	0.0322571	0.147999
SPPL2B	423.167	404.333	442	0.128501	0.896472	0.370001	0.65426
FAM214B	1997	1786.67	2207.33	0.305034	3.70746	0.000209346	0.00252447
COPZ2	345	297.333	392.667	0.401224	2.0159	0.04381	0.184776
PRKAR2B_ENSG00000005249	35	59.333	10.667	-2.47573	1.84978	0.064345	0.238085
MSL3	535.833	537.333	534.333	-0.00807732	0.103271	0.917748	1
CREBBP	450.167	474.667	425.667	-0.157191	1.80921	0.0704181	0.255093
TSPOAP1	14.333	21.333	7.333	-1.54057	4.52898	5.92701e-06	0.000110542
MPO	1	0	2	Inf	1.5621	0.118265	0.342035
GCFC2	159	161	157	-0.0362961	0.367027	0.713599	0.883229
WDR54	806	810.667	801.333	-0.0167063	0.146648	0.88341	0.981231
CROT	2288.67	2724.33	1853	-0.55604	3.00917	0.00261964	0.0211961
ABCB4	1.167	2.333	0	#NAME?	1.42522	0.154094	0.392529
KMT2E	1138	1173.33	1102.67	-0.0896162	1.00519	0.314806	0.595537
RHBDD2	4910.33	5664.33	4156.33	-0.446595	7.36221	1.80891e-13	1.30944e-11
SOX8	0.667	0.667	0.667	0	0	1	1
IBTK_ENSG00000005700	1420.83	1248.33	1593.33	0.352045	2.89747	0.00376183	0.0284911
ZNF195	509	464	554	0.255761	4.12064	3.77826e-05	0.000570717
MYCBP2	330.167	366.333	294	-0.317341	2.01416	0.0439932	0.185325
FBXL3	883.833	838.667	929	0.147581	0.62058	0.534876	0.799871
ITGAL	0.833	1.333	0.333	-2	1.199	0.230529	0.497897
PDK2	340.833	379.667	302	-0.330185	2.33575	0.0195044	0.10193
ITGA3	26332.3	27529	25135.7	-0.131216	1.12516	0.26052	0.537999
ZFX	672.5	660.333	684.667	0.0522073	0.882513	0.3775	0.662309
LAMP2	12029	12647.7	11410.3	-0.14853	1.09328	0.274269	0.556791
ITGA2B	4.333	8	0.667	-3.58496	2.60253	0.009254	0.0577393
ASB4	3	5.667	0.333	-4.08746	3.77124	0.000162441	0.00202387
GDE1	3282.5	3583	2982	-0.264888	3.86518	0.000111006	0.00145669
REX1BD	785.833	760	811.667	0.0948879	0.949286	0.342475	0.624579
CRLF1	112.333	118.333	106.333	-0.154263	0.572187	0.567196	0.805072
OSBPL7	335	339.667	330.333	-0.0401971	0.62454	0.532273	0.797397
TMEM98	2383.17	2272.67	2493.67	0.133883	1.86525	0.0621459	0.231918
YBX2_ENSG00000006047	7.5	10	5	-1	2.04932	0.0404306	0.173645
KRT33A_ENSG00000006059	2.5	2	3	0.584963	0.580008	0.56191	0.801668
MAP3K14_ENSG00000006062	128.333	143.667	113	-0.346403	0.990335	0.32201	0.601166
ABCC8	0.833	0.333	1.333	2	0.677312	0.498208	0.769032
TMEM132A	16353.5	13736	18971	0.465834	7.37069	1.69743e-13	1.23608e-11
AP2B1	4449.83	4019.67	4880	0.279805	3.45906	0.000542066	0.00568028
TAC1	1.5	0.333	2.667	3	1.55849	0.119117	0.343692
ZNF263	805	845	765	-0.143492	1.51986	0.128546	0.36337
CX3CL1	1136.5	984.333	1288.67	0.38866	1.14515	0.252146	0.527374
SPATA20	1338.5	1386	1291	-0.102438	0.383434	0.701398	0.879883
TNFRSF12A	14104.7	12175	16034.3	0.397243	2.59733	0.00939507	0.058304
MAP3K9	1471.5	1347.67	1595.33	0.243394	1.5052	0.132273	0.36977
RALA	3267	2855.67	3678.33	0.365225	3.65391	0.000258277	0.00302191
BAIAP2L1	1754.67	1591.33	1918	0.269367	3.12691	0.00176652	0.0153251
KDM7A	251.167	261.667	240.667	-0.120694	0.465795	0.641362	0.858974
ETV1	6.833	7	6.667	-0.0703893	0.0906516	0.927769	1
AGK_ENSG00000006530	571	542.667	599.333	0.143292	1.49166	0.135789	0.376515
ALDH3B1	334	383	285	-0.426382	3.61654	0.000298571	0.00342277
TTC22	650.167	659.667	640.667	-0.0421633	0.535883	0.592039	0.827115
PHTF2	425.5	433.667	417.333	-0.0553864	0.454064	0.649783	0.858974
CCL26	10	15	5	-1.58496	2.57162	0.0101225	0.0617964
FARP2	796.333	786.333	806.333	0.0362354	0.618458	0.536273	0.801175
GGCT	263.667	249.667	277.667	0.153351	1.25096	0.210948	0.473929
DBF4	58.667	62.333	55	-0.180572	1.02988	0.303065	0.595272
TBXA2R	6.167	6.333	6	-0.0780025	0.117094	0.906785	0.994606
IFRD1	2686	2710	2662	-0.0257823	0.15089	0.880063	0.97937
COX10	514	544.333	483.667	-0.170477	1.4605	0.144152	0.391472
GTF2IRD1	482.833	519.667	446	-0.220543	1.62641	0.103862	0.316004
PAF1	1328.67	1306.33	1351	0.0485046	0.627324	0.530447	0.79603
VPS41	1912.17	1875.33	1949	0.055587	0.485401	0.627392	0.855338
ARHGAP44	126	147.333	104.667	-0.493282	4.47607	7.60285e-06	0.000138205
ELAC2	3349	3472	3226	-0.106021	1.3619	0.173229	0.419404
SCIN	137.5	202.333	72.667	-1.47737	2.26522	0.0234992	0.116632
ARSD	642.333	615.667	669	0.119857	2.49682	0.0125314	0.0729254
PNPLA4	376.5	378	375	-0.0114956	0.174073	0.861808	0.968527
ADIPOR2_ENSG00000006831	106.5	100.333	112.667	0.16726	0.733418	0.463303	0.743264
CDKL3	9.5	12.333	6.667	-0.887525	1.71716	0.0859499	0.278638
UPP2	0.833	0.333	1.333	2	1.34164	0.179712	0.425474
PRSS21_ENSG00000007038	19	18.667	19.333	0.0506261	0.0819778	0.934664	1
MARK4	127.667	111.333	144	0.371183	2.61977	0.00879886	0.0556346
PROM1	88.333	104.333	72.333	-0.528468	1.47923	0.139079	0.383199
CCDC124	1629.33	1589	1669.67	0.071441	0.587922	0.556585	0.801668
PAFAH1B1	1784.5	1568.33	2000.67	0.351249	3.90211	9.53561e-05	0.00127394
NOS2	3	0.667	5.333	3	2.16413	0.030454	0.14151
DNAH9	2.167	1.333	3	1.16993	1.38675	0.165518	0.406463
KIAA0100	4114.17	4258.67	3969.67	-0.101384	0.63303	0.526714	0.793022
GAS7	9.167	6.667	11.667	0.807355	1.53711	0.124266	0.35435
TRAPPC6A	434.5	485.667	383.333	-0.341367	3.98574	6.72689e-05	0.000946921
MATK	2.333	1.667	3	0.847997	0.649255	0.516174	0.786168
CEACAM7_ENSG00000007306	23.5	27.333	19.667	-0.474909	1.24089	0.214648	0.479987
ST7L	192.667	185.667	199.667	0.104879	0.919471	0.357849	0.641279
PAX6	0.5	0.333	0.667	1	0.57735	0.563703	0.801668
RPUSD1	998.667	999.333	998	-0.00192616	0.0272421	0.978267	1
RHBDF1	1791	1666.67	1915.33	0.20063	2.41324	0.0158115	0.0870702
LUC7L	437.5	406.667	468.333	0.203689	2.75103	0.0059408	0.0411487
CACNA2D2	4.5	4.333	4.667	0.106915	0.19245	0.84739	0.959428
BAIAP3	40.167	48	32.333	-0.570012	1.21331	0.225011	0.493288
TSR3	1430.33	1531.33	1329.33	-0.204085	1.38077	0.16735	0.409849
PIGQ	1600.5	1677	1524	-0.13802	1.33541	0.181743	0.42924
CRAMP1	166.333	169	163.667	-0.0462627	0.247656	0.804401	0.934066
TEAD3	624.5	608	641	0.076253	0.888272	0.374395	0.659258
DNAJC11	1078.5	1012	1145	0.178138	2.53442	0.0112633	0.0674608
FMO3	11.5	10	13	0.378512	1.03923	0.298698	0.589446
MYLIP	72.5	86.667	58.333	-0.571157	4.07544	4.59278e-05	0.000674539
NOX1	20	18.667	21.333	0.192645	0.730297	0.465209	0.744768
E2F2_ENSG00000007968	3	2	4	1	0.675161	0.499574	0.770604
PSMB1_ENSG00000008018	4873	4579	5167	0.174294	4.1503	3.32045e-05	0.00050849
SYN1	9.5	8.333	10.667	0.356144	0.927173	0.353837	0.636426
JARID2	310.167	318.333	302	-0.0759897	1.11364	0.265435	0.544646
CDKL5	98.5	85.667	111.333	0.37808	1.02788	0.304007	0.595537
CAMK1G	4.667	1	8.333	3.05889	1.58091	0.113899	0.333602
CDK11A	9.333	10.333	8.333	-0.31034	0.641994	0.520877	0.79124
NADK	1928.33	2053.33	1803.33	-0.187302	2.76879	0.00562641	0.0393397
DLEC1	3.5	4.667	2.333	-1	0.881396	0.378104	0.662347
CYTH3	875.5	887	864	-0.0379028	0.357717	0.720555	0.886342
ADAM22	4.5	6	3	-1	1.73205	0.0832645	0.272284
SYPL1	4339.33	4193	4485.67	0.0973396	0.530753	0.59559	0.829115
CYB561	1550.83	1455.67	1646	0.177284	2.4019	0.0163103	0.089299
SPAG9	1540.33	1474.33	1606.33	0.123709	2.2795	0.0226372	0.113465
CELSR3	19.333	17.667	21	0.249359	0.855882	0.392063	0.676645
AASS	50.5	50.333	50.667	0.00952277	0.0516492	0.958808	1
PLEKHG6	817.333	873.333	761.333	-0.198004	1.08433	0.278221	0.5619
SS18L2	322.5	332.333	312.667	-0.0880056	0.906533	0.364654	0.649039
MPND	90.667	98	83.333	-0.233888	0.916967	0.35916	0.642936
MGST1	5058.5	6070.67	4046.33	-0.58524	3.21416	0.00130828	0.0119265
CRY1	478.333	473.667	483	0.028151	0.189285	0.84987	0.961399
PGLYRP1	0.333	0	0.667	Inf	1.41421	0.157299	0.392529
NFIX	168.333	189	147.667	-0.356042	2.88671	0.00389287	0.0291756
ST3GAL1	1925.67	1823.67	2027.67	0.152978	1.28527	0.198697	0.457285
MMP25	43.167	31	55.333	0.835881	4.21008	2.55283e-05	0.000401783
IL32	3438.83	2170	4707.67	1.11732	8.61385	7.06469e-18	8.28572e-16
PKD1	201.5	216	187	-0.207993	0.638192	0.523348	0.792553
MAPK8IP2	81.833	108.333	55.333	-0.969256	5.14253	2.71058e-07	7.20313e-06
MED24	2032.83	1901	2164.67	0.187386	2.09104	0.0365248	0.160747
RHOBTB2	513.667	654.667	372.667	-0.812875	7.19538	6.22854e-13	4.17432e-11
HEATR5B	605	599.667	610.333	0.0254366	0.285718	0.775094	0.920904
SEC62	2060.33	2008.67	2112	0.0723717	0.459189	0.646099	0.858974
RPS20	1698.5	1603	1794	0.162405	5.4124	6.21839e-08	1.91055e-06
CSDE1	9685.83	9328.67	10043	0.106447	2.48853	0.0128272	0.0741339
UBE3C	2554.17	2587.67	2520.67	-0.0378464	0.52393	0.600327	0.83349
REV3L	149.333	175	123.667	-0.500898	4.74127	2.12385e-06	4.46649e-05
TENM1	1.333	0.667	2	1.58496	1.22926	0.218976	0.485631
IYD	6.667	7	6.333	-0.14439	0.264861	0.791116	0.928877
FAM76A	161.833	159	164.667	0.0505218	0.368729	0.712329	0.883229
TRAF3IP3	5.667	2.667	8.667	1.70044	2.40275	0.0162725	0.0892063
POMT2	666.833	712.333	621.333	-0.197185	3.81945	0.000133747	0.00170915
VTA1	2446.5	2293.67	2599.33	0.180486	1.42024	0.155537	0.392529
MLXIPL	1	0.667	1.333	1	0.415247	0.677961	0.862432
BAZ1B	1015.33	1014.67	1016	0.00189454	0.0304695	0.975693	1
RANBP9	529.333	509	549.667	0.110891	1.29741	0.194492	0.450219
ETV7	130.833	140.333	121.333	-0.209882	1.90743	0.0564646	0.219305
SPRTN	409.167	407	411.333	0.0152792	0.184078	0.853952	0.963649
EEF1AKNMT	1139.5	1166.67	1112.33	-0.0688032	0.834276	0.404126	0.690714
DYRK4	281.167	264.667	297.667	0.169521	2.41034	0.0159378	0.0876229
ZNF207	3311.17	3049.67	3572.67	0.22835	8.26224	1.42967e-16	1.46673e-14
UQCRC1	10221.7	10534.7	9908.67	-0.0883818	1.79043	0.0733849	0.262573
STARD3NL	1416.17	1336.67	1495.67	0.162149	1.5143	0.129949	0.365971
CD9	11052.5	11587	10518	-0.139647	1.46664	0.142474	0.389603
NCAPD2	703.5	748	659	-0.18276	1.37049	0.170536	0.414984
IFFO1	54.833	51	58.667	0.202044	1.25885	0.208083	0.469235
GIPR	77.833	86.333	69.333	-0.316369	1.60613	0.108245	0.324748
PHF7	77.5	86.667	68.333	-0.342888	1.45453	0.1458	0.392529
SEMA3G	1	1.333	0.667	-1	0.440455	0.659607	0.858974
NISCH	2236.83	2376	2097.67	-0.179749	2.31449	0.0206409	0.105974
STAB1	1.5	1.667	1.333	-0.321928	0.26852	0.788299	0.926506
FUZ	116.167	120	112.333	-0.0952483	0.471315	0.637416	0.858974
SLC6A13	0.833	0.667	1	0.584963	0.447214	0.654721	0.858974
IDS	569.667	600.333	539	-0.155479	1.27156	0.203531	0.465032
PRSS3	158	163	153	-0.0913403	0.385407	0.699936	0.879296
ZNF200	247	234.667	259.333	0.144195	1.26957	0.204239	0.466166
CD4	5.833	5.667	6	0.0824622	0.130606	0.896087	0.988292
LRRC23	101.5	106.333	96.667	-0.137504	1.00123	0.316717	0.595537
BTK	1	1	1	0	0	1	1
HFE	242.333	268.333	216.333	-0.31077	1.87896	0.06025	0.226891
SCMH1	409.833	464.667	355	-0.388377	4.09051	4.30433e-05	0.000636388
FYN	1103.67	945	1262.33	0.417707	4.31892	1.56793e-05	0.000261625
HIVEP2	611.833	659	564.667	-0.222879	0.956205	0.338969	0.620434
FMO1	1	0	2	Inf	1.46348	0.143337	0.390345
ELOA	1847	1629	2065	0.342155	3.02524	0.00248435	0.0202221
LYPLA2	4791.33	4471.33	5111.33	0.192995	1.99127	0.0464514	0.18985
CLCN6	158	178.667	137.333	-0.379589	2.16881	0.0300972	0.140279
MRC2	3998.5	4202.67	3794.33	-0.147459	0.633979	0.526094	0.793022
SLC6A7	5.333	2.667	8	1.58496	2.13508	0.0327544	0.149631
TSPAN9	147.167	146	148.333	0.0228745	0.120017	0.904469	0.993257
BTBD7_ENSG00000011114	887.667	897	878.333	-0.0303394	0.460417	0.645217	0.858974
APBA3	849.667	848.333	851	0.00452788	0.0487661	0.961106	1
MKS1	360.667	360.667	360.667	0	0	1	1
ABHD5	709.833	685.667	734	0.0982727	1.0663	0.286286	0.572924
ANOS1	591	531.667	650.333	0.290657	2.55164	0.0107218	0.0646938
AKAP8L	1981.83	2099	1864.67	-0.170784	1.33041	0.183382	0.432065
MBTD1	70	77.333	62.667	-0.303392	1.22509	0.220542	0.488302
UTP18	472.333	455.333	489.333	0.103894	1.13861	0.254868	0.531456
RNF216	996.667	1001.33	992	-0.0135103	0.181627	0.855875	0.964932
TTC19	1704.33	1442	1966.67	0.447681	6.48934	8.62121e-11	4.29213e-09
PTBP1	4480.5	4496.33	4464.67	-0.0101965	0.112233	0.910639	0.997173
DPF1	3.667	2.333	5	1.09954	1.70561	0.0880815	0.283963
SYT7	154.5	196.333	112.667	-0.801244	4.36677	1.261e-05	0.000216177
LARS2	711.5	702	721	0.0385282	0.528093	0.597435	0.830972
PIK3C2A	875	907.333	842.667	-0.106671	0.816813	0.414035	0.698447
PLAUR	5513	3368.33	7657.67	1.18487	5.82749	5.62669e-09	2.10204e-07
ANLN	170.5	171	170	-0.00846158	0.0401801	0.96795	1
WIZ	668.5	677.333	659.667	-0.0381288	0.498505	0.618128	0.847576
RABGAP1	1609.67	1643.67	1575.67	-0.0609554	2.07581	0.037912	0.16539
DCN	52.5	82	23	-1.83399	9.027	1.76438e-19	2.59989e-17
QPCTL	100.167	106	94.333	-0.168225	0.591696	0.554054	0.801668
PPP5C	1393.17	1360.33	1426	0.0680138	1.1669	0.243249	0.515781
CEP68	525.833	614.333	437.333	-0.490288	3.50901	0.000449785	0.00483796
MAP4K3	851.5	821.333	881.667	0.102265	0.796106	0.42597	0.709224
ZBTB32	0.833	1.667	0	#NAME?	1.59159	0.111476	0.328715
TMEM159_ENSG00000011638	1264.5	1203.67	1325.33	0.138919	2.78173	0.00540702	0.0380676
GABRA3	21	18	24	0.415037	1.58481	0.113009	0.332072
BRCA1	38	34.667	41.333	0.253757	0.766715	0.443251	0.725517
ERCC1	1356.17	1327.67	1384.67	0.0606457	0.394128	0.693487	0.874024
CD22	2	1.333	2.667	1	0.605581	0.544793	0.801668
SEMA3B	849.5	759.667	939.333	0.306271	1.64718	0.099521	0.309118
MBTPS2	829.833	822	837.667	0.0272379	0.282095	0.777871	0.921316
PRICKLE3	512.167	526.667	497.667	-0.0817104	1.14177	0.253551	0.529705
LTF	110.667	155	66.333	-1.22446	2.2581	0.0239395	0.118148
EXTL3	2703.5	2730.33	2676.67	-0.0286396	0.301155	0.763297	0.912775
ELOVL5	2257.67	2335.33	2180	-0.0993004	0.805077	0.420775	0.704324
ALOX5_ENSG00000012779	420.167	423	417.333	-0.0194575	0.1286	0.897674	0.989417
KDM5D	523.833	559	488.667	-0.193998	1.9096	0.0561844	0.218564
CALCOCO1	2351.17	2337.67	2364.67	0.0165676	0.1812	0.856211	0.965126
UBR7_ENSG00000012963	485	471	499	0.0833128	1.01162	0.311719	0.595537
MAP4K5	1328.5	1272	1385	0.122787	1.29529	0.195221	0.451421
EHD3	1559.33	1221.67	1897	0.634869	5.94711	2.72915e-09	1.06015e-07
PSMC4_ENSG00000013275	2474.83	2226.33	2723.33	0.290704	12.2357	2.00355e-34	6.78841e-32
MAN2B2	1730.33	1727	1733.67	0.00555845	0.0566593	0.954817	1
CLDN11	4.333	4.333	4.333	0	0	1	1
SLC25A39	7022.17	7086.67	6957.67	-0.0265036	0.308816	0.757461	0.909901
MVP	13262	13587.7	12936.3	-0.070869	0.641789	0.52101	0.79136
NUB1	695.667	673	718.333	0.094047	2.06372	0.0390444	0.169241
PGM3	1452.33	1241.67	1663	0.42151	2.73829	0.00617601	0.0422501
RWDD2A	132.833	115.333	150.333	0.382355	1.94465	0.0518169	0.206481
CLK1	284.333	327.667	241	-0.443196	2.18335	0.0290101	0.136306
POLR3B	370.833	313.333	428.333	0.451036	4.55763	5.17331e-06	9.8289e-05
ANGEL1	711.667	790.333	633	-0.320256	2.8791	0.00398811	0.0297432
RNF14	2099.67	2093	2106.33	0.00916145	0.278936	0.780294	0.92254
DNASE1L1	128.5	142.667	114.333	-0.319402	1.56062	0.118615	0.342844
DDX11	201.833	207.667	196	-0.083416	0.99114	0.321617	0.600755
HEBP1	603.5	628.667	578.333	-0.120394	1.06829	0.285391	0.57165
GPRC5A	19915	17541	22289	0.345601	1.92409	0.0543429	0.212963
MAMLD1	75.167	64.667	85.667	0.405712	2.46872	0.0135598	0.0775962
CD6	6.5	8	5	-0.678072	0.980957	0.326614	0.607226
TACC3	51	59	43	-0.456378	2.12789	0.0333464	0.1516
UFL1	614.333	574.333	654.333	0.188137	1.60412	0.108688	0.325375
POLA2	40.333	37.667	43	0.191048	0.808091	0.419038	0.702814
ZC3H3_ENSG00000014164	935.667	917.667	953.667	0.0555149	0.430661	0.666715	0.858974
CAPN1	17826.2	16992.3	18660	0.135065	1.42873	0.153082	0.392529
ACP3	23.667	24.333	23	-0.0813001	0.264879	0.791103	0.928877
MDH1	4360	4607.67	4112.33	-0.164079	4.83226	1.34994e-06	2.99107e-05
SLC30A9	2150	2019.33	2280.67	0.175577	2.4538	0.0141354	0.0802686
MTMR11	431.333	425.667	437	0.0379092	0.313583	0.753838	0.908097
COX15	373.167	375	371.333	-0.0141758	0.182429	0.855246	0.964577
CCDC88C	332.167	361.667	302.667	-0.256931	2.27635	0.022825	0.114091
YAF2	167.833	147	188.667	0.360023	2.28961	0.0220442	0.111293
ZMYND11	1225.83	1248.67	1203	-0.0537518	0.826776	0.408364	0.694509
WAS	0.333	0.333	0.333	0	0	1	1
BID	3234.33	2750	3718.67	0.435354	5.01607	5.27401e-07	1.3009e-05
MATR3_ENSG00000015479	20.5	19.333	21.667	0.164387	0.631169	0.52793	0.793717
NPC1L1	2	3	1	-1.58496	1.73205	0.0832645	0.272284
XYLT2	1600.33	1708.33	1492.33	-0.19502	1.61487	0.10634	0.320702
NUDCD3	3875.5	3776.67	3974.33	0.0735994	0.80651	0.419949	0.703596
ISL1	54.5	65.333	43.667	-0.581287	3.31039	0.000931662	0.00900828
CHDH	57.5	85	30	-1.5025	8.39608	4.6163e-17	5.04998e-15
IL20RA	238.333	290.667	186	-0.644063	4.44997	8.58838e-06	0.000154509
CLCA4	80.667	94.333	67	-0.493607	1.05362	0.292057	0.580302
GLT8D1	1209.5	1218.67	1200.33	-0.0218685	0.645631	0.518519	0.788902
ATP2C1	3601.33	3199.67	4003	0.32316	5.64188	1.68206e-08	5.74704e-07
SLC38A5	14300	14303.7	14296.3	-0.000739844	0.00585698	0.995327	1
RALBP1	1163.83	1215.33	1112.33	-0.127763	2.68257	0.00730585	0.0482736
RUFY3	361.333	367	355.667	-0.0452543	0.553061	0.580222	0.816292
CNTN1	69.167	78.333	60	-0.384664	1.68479	0.0920299	0.292784
SLC11A1	5.167	5	5.333	0.0931094	0.139035	0.889423	0.984198
WWTR1	1421.5	1470	1373	-0.0984845	0.77521	0.438215	0.720985
AGPS	1194.5	1159	1230	0.0857777	1.03199	0.302078	0.593967
ZNF806	0.333	0.333	0.333	0	0	1	1
CXorf56	203.833	207	200.667	-0.0448298	0.327515	0.743278	0.900312
ATP1A2	1.333	0	2.667	Inf	2.71314	0.00666495	0.0448652
TTC27	392.667	392	393.333	0.0048988	0.0824086	0.934322	1
ZNF582	93.667	98.333	89	-0.143875	0.614206	0.539079	0.801668
VSIG2	593.167	556	630.333	0.18103	1.3541	0.175704	0.423842
PHLDB1	1727.83	1866.33	1589.33	-0.231785	6.10792	1.00937e-09	4.23084e-08
MARCO	118.333	80.333	156.333	0.960555	8.55669	1.16157e-17	1.33035e-15
CYP24A1	877.333	1038.67	716	-0.536701	2.16148	0.0306582	0.142269
PRDM11	87.5	107.667	67.333	-0.677179	5.28087	1.2857e-07	3.61343e-06
SYT13	1.167	2.333	0	#NAME?	2.64575	0.00815097	0.0522858
SNAI2	3784.67	4017.33	3552	-0.177607	1.13429	0.256674	0.532834
CD74	3742.67	4340	3145.33	-0.464482	1.88613	0.0592774	0.224284
ZRANB1	289.667	290	289.333	-0.00332036	0.026137	0.979148	1
NCDN	1415.5	1321.33	1509.67	0.192236	6.13081	8.74326e-10	3.70298e-08
ADGRA2	6.333	8.667	4	-1.11548	2.21359	0.0268567	0.128312
ZFP64	785	850.333	719.667	-0.2407	2.2581	0.0239391	0.118148
MNAT1	531.833	494.333	569.333	0.203789	1.79809	0.0721626	0.259265
SAMD4A	390.167	383	397.333	0.0530054	0.381262	0.703009	0.879883
RUNX3	96.333	104	88.667	-0.23012	1.1802	0.237921	0.508061
MRE11	279.167	303.333	255	-0.250407	3.45434	0.000551642	0.00576577
PLEKHB1	169.167	192.333	146	-0.39764	2.147	0.0317935	0.146312
SERPINB1	5424.33	3997.67	6851	0.777156	12.0435	2.09771e-33	6.73337e-31
SPAST	363.333	361.333	365.333	0.015883	0.119872	0.904585	0.993267
NRXN3	12	13.667	10.333	-0.403356	0.815059	0.415039	0.699041
OSBPL5	557.5	563.333	551.667	-0.030192	0.168579	0.866128	0.971011
AQR	982.5	989.333	975.667	-0.0200683	0.240582	0.809879	0.938155
CPS1	163.667	152	175.333	0.206029	1.06517	0.286798	0.573666
C8B	2.5	2.667	2.333	-0.192645	0.168795	0.865958	0.97098
FHL1	998.167	1040	956.333	-0.120998	1.31037	0.19007	0.442735
RTF2	1488.83	1433.67	1544	0.106963	2.44845	0.0143473	0.0806105
NLRP2_ENSG00000022556	615	555	675	0.2824	2.44802	0.0143643	0.0806105
SLC45A4	69.667	73.667	65.667	-0.165851	0.512888	0.60803	0.839867
RNF10	7291.17	7428	7154.33	-0.0541565	0.613914	0.539272	0.801668
ZNF839	151.667	141	162.333	0.203264	2.08292	0.0372587	0.162994
ZDHHC6	828.833	726.667	931	0.357487	2.93517	0.00333364	0.0258008
GRAMD1B	72.333	84	60.667	-0.469485	1.68124	0.0927154	0.294427
RNH1_ENSG00000023191	7510.83	7643.67	7378	-0.0510351	0.502019	0.615654	0.84592
NDUFS1_ENSG00000023228	1905.5	1963.33	1847.67	-0.0876006	1.41064	0.15835	0.394136
RB1CC1	2177.67	2439.67	1915.67	-0.348837	1.86084	0.062767	0.233914
ERP44	1873.83	1675.67	2072	0.306289	4.11969	3.79376e-05	0.000572348
ALAS1	1284	1245.33	1322.67	0.0869176	0.88514	0.376081	0.661282
BIRC3	745.833	576.333	915.333	0.667394	5.09189	3.54513e-07	9.142e-06
AKAP11	171.833	166	177.667	0.0979898	1.09003	0.2757	0.558566
GLRX2	317.167	286.333	348	0.281392	1.53915	0.123768	0.353138
SNAPC1	509.833	584.667	435	-0.426599	2.16033	0.0307472	0.142573
DERA	1876	1730.33	2021.67	0.224495	3.18247	0.00146027	0.0130872
STRAP	4483.33	4269.33	4697.33	0.137831	1.80106	0.0716931	0.258252
ABCC2	8.5	9	8	-0.169925	0.274071	0.78403	0.924181
DEF6	403	397	409	0.0429618	0.470428	0.638049	0.858974
PLEKHO1	244.167	251	237.333	-0.0807726	0.918912	0.358142	0.641662
GCLM	1257.33	1384	1130.67	-0.29167	2.33789	0.0193931	0.101501
UBR2	1016.5	1065.67	967.333	-0.139671	0.702054	0.482646	0.758741
EHD2	13023	13840.7	12205.3	-0.181402	1.40148	0.161071	0.399007
CCDC28A	293	353.333	232.667	-0.602765	3.86011	0.000113336	0.00148407
RRAGD	285.667	302.667	268.667	-0.171912	1.35188	0.176415	0.425069
HSF2	218	235.667	200.333	-0.234345	0.873065	0.382628	0.668113
PHF20	812	772.667	851.333	0.139878	2.52326	0.0116273	0.0688307
HSD17B6	43	47.667	38.333	-0.314381	1.09631	0.272942	0.555054
NR1H3	87.333	92.667	82	-0.176427	1.31992	0.18686	0.437598
TYMP	2830.17	2280.33	3380	0.567779	2.67295	0.00751886	0.0493826
NCAPH2	502.167	488.333	516	0.0795048	0.707477	0.47927	0.755159
TOMM34	2185.83	2026.67	2345	0.210479	1.58149	0.113765	0.33341
SEC63	1475.67	1381.67	1569.67	0.184049	1.39123	0.164155	0.404501
KPNA6	2200.33	2251.33	2149.33	-0.0668904	2.66319	0.00774045	0.0504349
VIM	1595.83	1448.33	1743.33	0.267455	3.68375	0.000229825	0.00273759
RTEL1-TNFRSF6B	13.833	16.333	11.333	-0.527247	1.27839	0.201113	0.461055
FAS	1219.17	1121.33	1317	0.23204	1.9171	0.0552253	0.215797
RNASET2	244	280	208	-0.428843	4.08787	4.35346e-05	0.000642484
CD44	17111.2	16706	17516.3	0.0683345	0.963075	0.33551	0.615859
KCNG1	241.667	243.667	239.667	-0.0238796	0.143182	0.886147	0.98266
AGPAT4	196.833	190	203.667	0.10021	0.410237	0.681632	0.865282
SLAMF7	157	145.667	168.333	0.20865	1.16232	0.245104	0.518677
BTN3A1	412.5	444	381	-0.220769	2.97173	0.00296123	0.0235001
MIPEP	621.667	660.333	583	-0.179699	2.70057	0.00692218	0.0462648
PRKCH	747.167	785.333	709	-0.14752	3.06738	0.00215945	0.0180164
IFNGR1	7901.83	7511.33	8292.33	0.142709	0.750284	0.453084	0.735297
B4GALT7	1591.83	1527.67	1656	0.116373	0.997833	0.31836	0.596589
SH2D2A	34	15.333	52.667	1.78022	4.18961	2.79437e-05	0.000434853
VRK2	768.667	677.667	859.667	0.343202	3.13531	0.00171675	0.0149412
TNFRSF1B	12.333	15	9.667	-0.633872	0.759498	0.447555	0.729381
VEZT	1547.67	1212.67	1882.67	0.634595	13.9486	3.20836e-44	1.63058e-41
POU2F2	81.333	66.333	96.333	0.538301	4.07411	4.61909e-05	0.000677587
BRD9	623.5	574.333	672.667	0.228003	4.82124	1.42666e-06	3.14678e-05
SNX1	2688.83	2592.67	2785	0.103241	4.54274	5.55267e-06	0.00010452
TBPL1	272.5	264	281	0.0900322	0.758825	0.447957	0.729793
ARNTL2	1661.67	1220.67	2102.67	0.784551	11.4192	3.35157e-30	9.29109e-28
BCLAF1	1196.83	1119.33	1274.33	0.187103	1.10794	0.267889	0.547975
SLC39A9	2273.17	2296.67	2249.67	-0.0298302	0.326596	0.743973	0.900975
ANK1	268.833	439	98.667	-2.15359	23.0608	1.14704e-117	4.66366e-114
TFB1M	268.5	267	270	0.0161197	0.192318	0.847493	0.959428
RABEP1	910.167	956.333	864	-0.146482	3.01433	0.00257545	0.0208685
HMGB3	2304.67	2258	2351.33	0.0584336	0.813534	0.415912	0.700074
NUP160	1327.5	1435.33	1219.67	-0.234899	2.60469	0.00919581	0.0575062
BAK1	2322.83	2160.67	2485	0.201769	1.58275	0.113478	0.332968
MUSK	1.333	1.333	1.333	0	0	1	1
IKZF2	240	209.333	270.667	0.370715	4.46904	7.85698e-06	0.000142506
GRN	39412.2	44141.7	34682.7	-0.347926	3.70552	0.000210958	0.00253889
FAM13B	97.667	89.667	105.667	0.236877	1.80467	0.0711257	0.256635
ARHGAP31	280.167	205	355.333	0.793549	5.227	1.72284e-07	4.69069e-06
CENPQ	63.667	57	70.333	0.303247	0.803026	0.42196	0.705209
SARS1	5268.83	4639	5898.67	0.346575	5.24934	1.52649e-07	4.22534e-06
RANBP3	374.333	384.333	364.333	-0.0770991	1.15957	0.246224	0.52037
ARID4A	247	236	258	0.128584	0.898562	0.368886	0.653366
EIPR1	953.167	888	1018.33	0.197578	2.26335	0.0236139	0.116954
PNPLA6	1939	2029	1849	-0.134024	1.51161	0.130634	0.367475
IFT88	141.167	126.333	156	0.304311	1.47909	0.139117	0.383259
ALG1	720	725.333	714.667	-0.0213737	0.309838	0.756684	0.909505
ZCCHC8	343.667	310.333	377	0.280746	2.38624	0.0170217	0.0921537
ABCF2_ENSG00000033050	644.5	646	643	-0.00671543	0.118051	0.906027	0.994201
CHPF2	4109	4150.67	4067.33	-0.0292598	0.617231	0.537083	0.801668
LRRC7	1.667	1.667	1.667	0	0	1	1
FUT8	179.167	187.333	171	-0.131611	0.894887	0.370847	0.65533
UBA6	2914.33	2787	3041.67	0.126149	1.27332	0.202903	0.464162
GAB2	115	113	117	0.0501858	0.380314	0.703713	0.879883
ATP6V0A1	1805.33	1672.67	1938	0.212419	1.92664	0.0540239	0.21219
PIAS1	1316.67	1348	1285.33	-0.0686779	0.81586	0.41458	0.698708
SLC4A7	646.5	768	525	-0.548789	4.9597	7.06011e-07	1.67053e-05
APBA2_ENSG00000034053	1025.5	981.333	1069.67	0.124346	0.888717	0.374155	0.658903
MAP2K3	2637.83	2391.33	2884.33	0.270423	2.25459	0.0241592	0.119015
EFCAB1	17.667	24.333	11	-1.14543	3.70197	0.000213931	0.00256706
TMSB10	37390.7	32592.7	42188.7	0.372308	5.10736	3.2669e-07	8.48733e-06
ASTE1	145.333	145	145.667	0.00661788	0.0606618	0.951629	1
RNF19A	1511.33	1376.33	1646.33	0.258427	2.22167	0.0263058	0.126399
PEX3	598.5	571.667	625.333	0.129451	1.62761	0.103608	0.315625
GABARAPL2	2646.67	2581	2712.33	0.0716043	0.546192	0.584934	0.820981
SH3YL1	337	345	329	-0.0685088	0.669955	0.502887	0.773513
FAM136A	724.667	662	787.333	0.250143	3.53454	0.000408485	0.00447045
VCL	7896.33	7163.67	8629	0.268495	1.77803	0.0753982	0.267974
DEPDC1B	28.167	32.333	24	-0.429988	0.975831	0.329148	0.609594
DAPK2	246	338.667	153.333	-1.14319	12.302	8.83092e-35	3.12218e-32
NSMAF	898.667	967.667	829.667	-0.221978	2.38213	0.017213	0.0928688
ADSS2	547	520.667	573.333	0.139014	1.49206	0.135682	0.376389
STAP1	0.333	0.333	0.333	0	0	1	1
TIMP2	138.167	133.667	142.667	0.0940086	0.633211	0.526596	0.793022
RFC1	618.333	617.333	619.333	0.0046664	0.0966584	0.922998	1
TBC1D23	1621.5	1542	1701	0.14158	0.828089	0.40762	0.69355
CUL3	1556.5	1492.67	1620.33	0.118399	1.52788	0.126543	0.359331
MYOM2_ENSG00000036448	20.333	17.667	23	0.380604	1.44857	0.147457	0.392529
CYP46A1	0.667	1	0.333	-1.58496	1	0.317311	0.595537
AC118549.1	963.5	965.667	961.333	-0.00648852	0.0619685	0.950588	1
USP2	22.5	24	21	-0.192645	0.600231	0.548353	0.801668
TUBG2	433.333	482.333	384.333	-0.327672	2.64625	0.00813907	0.0522858
RPL26L1	541.667	524	559.333	0.0941415	1.6576	0.0973976	0.304266
FLT4	3.5	4.333	2.667	-0.70044	0.693343	0.488094	0.764057
NSUN2	2268.67	2131.33	2406	0.17488	7.06263	1.63384e-12	1.02726e-10
FBXO42	1435.5	1430.33	1440.67	0.0103852	0.189335	0.84983	0.961399
MFAP3	651.167	587.333	715	0.283764	3.66598	0.000246394	0.00290095
MRI1	288.5	301	276	-0.125095	1.30526	0.191803	0.445537
METTL1	231.5	217.333	245.667	0.176793	1.23884	0.215404	0.481238
AGA	581.5	556.667	606.333	0.123297	1.40713	0.15939	0.395716
PI4K2B	475	411	539	0.391147	2.37971	0.0173262	0.0933783
BOD1L1	499.833	480.667	519	0.110698	1.12262	0.261597	0.539492
MAT2B	2436	2491.67	2380.33	-0.0659475	0.552761	0.580427	0.81644
TLL1	42.833	57.667	28	-1.04231	2.50633	0.0121991	0.0715891
EDC4	1564.83	1500.67	1629	0.118383	0.929673	0.352541	0.634984
TRIO	849.333	876.667	822	-0.09289	0.727893	0.466679	0.746129
VCAN	4307.83	3446	5169.67	0.585149	6.32111	2.59683e-10	1.20897e-08
CLEC16A	881.5	900.667	862.333	-0.0627476	0.504369	0.614002	0.844577
MSR1	0.333	0	0.667	Inf	1.41421	0.157299	0.392529
CDH1	20974.7	17643.3	24306	0.462189	5.11644	3.11352e-07	8.14961e-06
MTREX	1054.83	1022	1087.67	0.0898413	1.36849	0.171159	0.416253
DNAH5	121	121.333	120.667	-0.00794875	0.0634809	0.949384	1
ZFYVE16	716.333	671	761.667	0.182847	1.47115	0.14125	0.387696
RIPOR1	1420.17	1395.67	1444.67	0.0497822	0.457769	0.647118	0.858974
RAI14	8395	8944.67	7845.33	-0.189193	2.08873	0.0367322	0.161263
SOX30	9.5	9.333	9.667	0.0506261	0.130189	0.896417	0.988478
PNKP	901	1012.33	789.667	-0.358369	3.78107	0.000156157	0.00195859
PHLPP2	133.5	126.667	140.333	0.147821	0.868346	0.385205	0.669832
SPDL1	237	214.333	259.667	0.276805	3.33598	0.000849994	0.00833759
STAU2	819.667	796.667	842.667	0.0809858	0.928034	0.35339	0.635856
SLC66A1	615	699.333	530.667	-0.398174	5.76604	8.11574e-09	2.94181e-07
CTNS	567	620.333	513.667	-0.272211	3.20667	0.00134281	0.0121776
RTN4R	163.5	175.667	151.333	-0.215111	2.33071	0.0197686	0.102608
PHF23	2215	2139.67	2290.33	0.0981715	1.75476	0.0793005	0.272284
CDH10	84	76.333	91.667	0.264084	1.99061	0.0465233	0.190052
INPP4A	824.667	897.667	751.667	-0.256087	2.19714	0.0280105	0.132652
RAB27B	957.5	877.333	1037.67	0.242146	1.27664	0.201728	0.462146
PSMA4	3015.17	2815.33	3215	0.191513	2.43384	0.0149394	0.083097
MYO16	28.833	27.667	30	0.116814	0.321487	0.747842	0.903327
LSG1	770.667	782.333	759	-0.0436836	0.397269	0.691169	0.872455
PARP3	390.167	366.333	414	0.176474	1.41569	0.156866	0.392529
TNC	25013.7	16841	33186.3	0.978611	4.93253	8.11734e-07	1.89133e-05
THAP3	277	285.333	268.667	-0.086831	0.859495	0.390067	0.675063
RIPOR3	29.167	36	22.333	-0.688798	1.71764	0.085863	0.278393
TDP1	471.5	456.333	486.667	0.0928459	1.32187	0.186211	0.436372
AIFM2	353.333	335	371.667	0.149848	0.233857	0.815096	0.941347
SPATA7	132.833	142.333	123.333	-0.206711	1.51908	0.128743	0.363591
MED17	78.667	71.667	85.667	0.257432	1.93321	0.0532107	0.20991
RETSAT	2536.33	2808.67	2264	-0.311011	3.08732	0.0020197	0.0170889
CAPG	9499.67	9117.67	9881.67	0.11609	0.945017	0.34465	0.626772
AP2S1	1594.33	1425.67	1763	0.306396	2.15146	0.0314401	0.14507
USH2A	0.5	0.667	0.333	-1	0.423359	0.672033	0.858974
ZPBP	1	1.333	0.667	-1	0.637584	0.523745	0.792553
TG	64.333	96	32.667	-1.55522	4.2725	1.93296e-05	0.000313884
ADAM28	2012	1735.33	2288.67	0.399295	1.76854	0.0769712	0.271963
BARX2	7.5	7.333	7.667	0.0641303	0.149071	0.881497	0.980239
DCUN1D1	1108.5	1093.33	1123.67	0.0394808	0.197128	0.843728	0.957502
JADE2	494.167	654.667	333.667	-0.972353	12.5579	3.59872e-36	1.39351e-33
LCP2	1	0	2	Inf	2.44761	0.0143808	0.0806105
TRIT1	264.167	278	250.333	-0.151234	1.24272	0.213971	0.478794
ADRB1	7.167	3	11.333	1.91754	2.97018	0.00297623	0.0235974
CUL7	970.167	1087	853.333	-0.349171	2.66613	0.00767293	0.0501154
CTNNA1	13973.5	13016.3	14930.7	0.197955	3.03194	0.0024299	0.0198637
PHKA2	249.167	255.667	242.667	-0.0752881	0.552998	0.580265	0.816306
CNTLN	67	75.333	58.667	-0.360747	1.84941	0.0643981	0.238188
EPHA3	11.167	13	9.333	-0.478047	0.803932	0.421436	0.70475
HSPA5	35045	31189.7	38900.3	0.318714	2.78373	0.00537376	0.0378881
DSG2	22693.5	23181	22206	-0.0619933	0.632818	0.526853	0.793022
GEMIN8	277	271.667	282.333	0.0555619	0.717385	0.473137	0.752718
OFD1	430.5	413.333	447.667	0.115119	1.86595	0.0620478	0.231729
GPM6B	13	11.333	14.667	0.371969	0.775447	0.438075	0.720985
WDR37	777.667	758	797.333	0.0729851	1.5967	0.110333	0.327903
YTHDC2	552.333	531.667	573	0.108013	0.764903	0.444329	0.726484
CTPS2	530.667	483	578.333	0.259878	5.0685	4.00962e-07	1.01784e-05
ATP6V1H	1681.83	1607.33	1756.33	0.127898	4.40206	1.07226e-05	0.00018778
POLR2B	2356.17	2370.67	2341.67	-0.0177571	0.31418	0.753384	0.90764
FAM214A	442.833	471.667	414	-0.188137	1.3596	0.173957	0.42075
ARAP2	698.5	714	683	-0.0640385	1.01778	0.308782	0.595537
TPR	1330.83	1389.33	1272.33	-0.126916	0.971062	0.331517	0.612132
CP	2851.5	3269.33	2433.67	-0.425865	3.54815	0.00038795	0.0042785
KIAA0556	368	406.333	329.667	-0.301656	2.60431	0.00920583	0.0575541
DTNBP1	260	261.667	258.333	-0.0184963	0.239473	0.810738	0.938768
XK	2.333	2	2.667	0.415037	0.332772	0.739306	0.897188
ANO2	1.667	2	1.333	-0.584963	0.461841	0.644195	0.858974
C12orf4	387	342.667	431.333	0.331997	2.14521	0.0319359	0.146802
SCML1	71	69.667	72.333	0.0541921	0.325129	0.745083	0.901478
WWC3	944.667	943.333	946	0.00407254	0.0222586	0.982242	1
ARHGAP6	6.5	7.333	5.667	-0.371969	0.390461	0.696196	0.876216
FAM184B	1.167	0.333	2	2.58496	1.88982	0.0587817	0.223327
MAP4	4749.17	4396.33	5102	0.214762	2.0808	0.0374525	0.16362
GOPC	1249	1185.33	1312.67	0.147208	1.13449	0.256588	0.532834
ROS1	83.833	72.333	95.333	0.39832	2.79873	0.00513046	0.0364891
USP28	580.333	676	484.667	-0.48003	4.76395	1.89844e-06	4.0377e-05
HDAC9	1036.67	794.667	1278.67	0.686218	9.93832	2.83563e-23	5.40432e-21
TSPAN17	1567.5	1564.67	1570.33	0.00521549	0.0329817	0.973689	1
NOP16	819.667	788.333	851	0.110353	1.25449	0.209663	0.47197
CC2D2A	120.167	122.667	117.667	-0.0600376	0.255521	0.798321	0.930751
RRM2B	2484.5	2848.67	2120.33	-0.425996	2.48725	0.0128734	0.074348
ZNF800	367.833	338.333	397.333	0.231905	2.95962	0.00308017	0.0242389
SNX29	84	80	88	0.137504	0.596561	0.5508	0.801668
LMO3	8.167	6.333	10	0.658963	0.731288	0.464603	0.744595
MRPS10	1427.17	1331.33	1523	0.194044	2.50555	0.012226	0.0717215
RSF1	525.333	525.333	525.333	0	0	1	1
VPS13D	1299.17	1629.67	968.667	-0.750505	5.66116	1.5035e-08	5.17317e-07
CELF2	767.333	629	905.667	0.52592	4.07706	4.56084e-05	0.000670414
FAM120A	814.667	805	824.333	0.0342391	0.453287	0.650342	0.858974
R3HDM1	353	384	322	-0.254046	2.39364	0.0166821	0.090657
COL9A2	351.833	296.667	407	0.456186	1.82137	0.0685501	0.24978
KITLG	614.833	750.667	479	-0.648147	4.51987	6.18763e-06	0.000114702
ERCC8	240.833	221.667	260	0.23012	1.39627	0.162634	0.401565
ADAMTS6	38	16.667	59.333	1.83188	2.80666	0.00500574	0.0357881
H6PD	1738.17	2110.67	1365.67	-0.628093	2.69746	0.00698702	0.0466343
VAMP3	3158.83	3167	3150.67	-0.00745974	0.102173	0.91862	1
PER3	278.167	355.667	200.667	-0.825725	5.83753	5.29791e-09	1.98529e-07
UTS2	36.333	32.333	40.333	0.31895	1.62427	0.104319	0.316661
TNFRSF9	184.167	45	323.333	2.84503	3.64784	0.000264458	0.00308682
EPN3	425.167	524	326.333	-0.68322	9.68494	3.4942e-22	6.04545e-20
LTBP1	1359.33	1219	1499.67	0.298944	1.92865	0.0537744	0.211448
RCN1	1297	1229	1365	0.151416	1.01907	0.308171	0.595537
RFC2	387.167	371	403.333	0.120553	1.23556	0.216621	0.482952
ARID1B	1208.33	1267	1149.67	-0.140201	2.15123	0.0314582	0.145098
CLPTM1L_ENSG00000049656	4439.83	4551	4328.67	-0.0722609	0.834018	0.404271	0.690791
NEDD4L	3499	3465	3533	0.0280384	0.288046	0.773311	0.920735
FOXP3	1.5	2.333	0.667	-1.80735	1.46936	0.141735	0.387965
PPP1R3F	155.833	165.333	146.333	-0.176119	1.82922	0.0673671	0.24639
HEXB	4405.83	5261	3550.67	-0.567247	6.45077	1.11287e-10	5.48453e-09
PTCD2	150	153.333	146.667	-0.0641303	0.239241	0.810919	0.938821
NEXMIF	1.333	1.667	1	-0.736966	0.632456	0.527089	0.793022
JKAMP	2592.5	2450.67	2734.33	0.158015	0.873538	0.38237	0.667806
DKK3	8857.5	9634.67	8080.33	-0.25382	1.81861	0.0689702	0.251011
ARHGEF5_ENSG00000050327	258.333	268.333	248.333	-0.111748	0.569331	0.569131	0.807019
NFE2L3	741.667	708.333	775	0.129768	2.10984	0.0348717	0.155407
MCUR1	437.5	456	419	-0.122084	1.18172	0.237319	0.507085
LIMA1	7928.17	8472.67	7383.67	-0.198479	3.63273	0.000280441	0.00325005
LETMD1	181.333	197.333	165.333	-0.255257	2.80419	0.00504432	0.0360024
SLC4A8	6.833	5.667	8	0.4975	0.666557	0.505055	0.77548
LAMC3	1.5	0.667	2.333	1.80735	0.647648	0.517213	0.787407
TNIP3	48.167	26.667	69.667	1.38543	2.59542	0.00944767	0.0585113
MAPK9	968.333	959.333	977.333	0.0268185	0.581291	0.561044	0.801668
COL23A1	37.333	52	22.667	-1.19794	3.85301	0.000116676	0.00152209
BCAR1_ENSG00000050820	5053.83	5112.33	4995.33	-0.033401	0.316184	0.751863	0.906479
FAM160A2	552	531	573	0.109823	1.67084	0.0947527	0.299059
HERPUD1	4988	4387.33	5588.67	0.34916	8.7235	2.69728e-18	3.35714e-16
HOMER3	3276.67	3296.33	3257	-0.0173184	0.280206	0.77932	0.921993
RAD51	50.833	44.333	57.333	0.370982	2.17271	0.0298023	0.139197
POLQ	2.167	2	2.333	0.222392	0.27735	0.781511	0.92254
PIK3CB	703.667	699	708.333	0.019136	0.246217	0.805514	0.935027
CYBA	6453.33	5994.33	6912.33	0.205573	2.97317	0.00294746	0.023406
THOC3	419.333	431.333	407.333	-0.0825933	0.914036	0.360698	0.644773
HEBP2	4248	3809	4687	0.299253	5.79449	6.85292e-09	2.51773e-07
MPHOSPH9	100.5	118	83	-0.507604	1.32798	0.184184	0.43341
PLEKHA5	772.167	789.667	754.667	-0.0654042	1.06116	0.288619	0.576127
PRSS8	7524	7179.33	7868.67	0.132269	0.962688	0.335704	0.616122
SIKE1	887.333	819.667	955	0.220463	1.13831	0.254991	0.531666
RRP12	1141	1181.33	1100.67	-0.102038	0.590493	0.55486	0.801668
FNIP2	699.667	819.667	579.667	-0.499814	4.92661	8.36666e-07	1.94571e-05
MSMO1	3065	2847	3283	0.205572	0.920206	0.357465	0.640728
TTC17	1931	2072	1790	-0.211064	2.00773	0.044672	0.186677
FSTL4	18	26.333	9.667	-1.4458	1.72125	0.0852055	0.277108
FOXN3	953.667	1192	715.333	-0.736697	5.50747	3.64028e-08	1.16541e-06
AKR7A2	1254.17	1382	1126.33	-0.295124	2.73989	0.0061459	0.0420929
MRTO4	720.167	723.667	716.667	-0.0140231	0.157164	0.875115	0.976558
NNAT	9.167	8	10.333	0.369234	0.51856	0.604068	0.836741
USE1	225.167	224.667	225.667	0.00640724	0.0536523	0.957212	1
MCF2L2	32.333	30.333	34.333	0.178706	0.671747	0.501745	0.772097
NRIP2	5.5	4.333	6.667	0.621488	1.21854	0.223017	0.491936
LAMA3	74362.7	63154.7	85570.7	0.438227	3.31325	0.000922181	0.00892953
AP5M1	1130.5	1098	1163	0.082973	0.780535	0.435076	0.71816
ANAPC4	465.667	425.333	506	0.250543	2.48446	0.0129749	0.0748458
KCNQ1_ENSG00000053918	435.833	482	389.667	-0.306793	1.39918	0.161759	0.400093
TRAPPC3	2904.17	2841.33	2967	0.0624368	1.35824	0.174388	0.421499
THRAP3	2794.5	2955.67	2633.33	-0.166593	2.68717	0.00720606	0.0477565
PHPT1	3114.67	3178.67	3050.67	-0.0592972	0.581936	0.56061	0.801668
ENTPD2	2	2	2	0	0	1	1
LY75	81.5	87	76	-0.195016	1.28218	0.199779	0.459178
ARID4B	758.333	770.333	746.333	-0.0456627	0.60699	0.543857	0.801668
OPN3	513.333	489.333	537.333	0.135	1.42693	0.153599	0.392529
SDCCAG8_ENSG00000054282	502	455	549	0.27094	2.50031	0.0124084	0.0724343
PTPRN	2.833	3	2.667	-0.169925	0.160524	0.872468	0.975492
HHAT_ENSG00000054392	295.167	286.667	303.667	0.0831144	0.625007	0.531966	0.797198
KIF1B	1210.67	1170	1251.33	0.0969576	0.944679	0.344823	0.626775
FOXC1	580	629.667	530.333	-0.247689	2.56326	0.0103695	0.0630048
TBC1D22A	1111	1052	1170	0.153374	1.38543	0.165921	0.407166
SYNE2	688	965.333	410.667	-1.23306	14.5206	8.96837e-48	5.33618e-45
PLEKHH1	64.5	64.333	64.667	0.0074558	0.0286012	0.977183	1
ATP9A	1634.33	1690	1578.67	-0.0983167	0.503891	0.614338	0.844821
FAM168A	165.333	159.667	171	0.0989332	0.71063	0.477313	0.755159
RELT	216.5	199	234	0.23374	1.70535	0.0881288	0.284078
GALC	1016.67	1004.33	1029	0.0350048	0.276475	0.782183	0.923143
NOP58	572.5	517	628	0.2806	2.34127	0.0192182	0.10084
SZRD1	573.333	556.333	590.333	0.0855803	1.05414	0.291818	0.580146
KCNH2	1.667	3	0.333	-3.16993	1.42248	0.154887	0.392529
CUL1	2379.67	2493	2266.33	-0.137523	5.4008	6.63451e-08	2.01807e-06
FAM114A2	455.333	435.333	475.333	0.126819	1.52715	0.126723	0.359742
CYFIP2	693.5	683	704	0.0436899	0.311447	0.755461	0.908661
TAB2	443.667	413.667	473.667	0.195403	3.48874	0.000485305	0.00516536
GINM1	1069.17	992.333	1146	0.20771	2.13174	0.0330284	0.150463
EIF2AK2	1137.17	1153.33	1121	-0.0410233	0.312811	0.754424	0.908207
USP36	809.333	764.667	854	0.159405	1.06224	0.288128	0.575666
KMT2C	610	643.667	576.333	-0.15941	0.362572	0.716924	0.883748
MCOLN3	166	197	135	-0.545236	1.22863	0.219211	0.486105
CCDC85A	0.667	0.667	0.667	0	0	1	1
PUM2	453.667	493.667	413.667	-0.255069	2.23296	0.0255515	0.123443
MRPL43	985.5	991.667	979.333	-0.0180553	0.209782	0.833838	0.952503
ITIH4	0.333	0	0.667	Inf	1.41421	0.157299	0.392529
HPF1	211.333	207.333	215.333	0.0546196	0.533673	0.593568	0.827515
ZFR	2568	2386.67	2749.33	0.204085	5.12148	3.03141e-07	7.98427e-06
ZNF280C	54.833	58.667	51	-0.202044	1.26803	0.204787	0.466851
NPFFR2	8.833	9.333	8.333	-0.163499	0.280343	0.779215	0.921919
PHF21B	0.5	0	1	Inf	1.73205	0.0832645	0.272284
TRAF1	84	67.667	100.333	0.568284	1.54515	0.122309	0.350035
RC3H2	1841.5	1745.33	1937.67	0.150818	5.24007	1.60519e-07	4.40478e-06
IL17RB	12.333	13.667	11	-0.313158	0.814335	0.415453	0.699495
TRAF3IP2	1220.83	1191	1250.67	0.0705239	1.0107	0.312158	0.595537
GYG2	8	8.333	7.667	-0.120294	0.274721	0.78353	0.924018
DCBLD2	7656.5	5901.33	9411.67	0.673409	6.43916	1.20137e-10	5.87324e-09
SERPINB3	3388.33	3808	2968.67	-0.359218	1.808	0.0706071	0.255467
SOAT1	1410.17	1383	1437.33	0.0555935	0.936724	0.348901	0.631131
PKP2	2757.67	2564	2951.33	0.202971	1.96808	0.0490588	0.198407
MSH4	1	0.667	1.333	1	0.415247	0.677961	0.862432
GDI2	4948.33	4476.67	5420	0.275868	4.89253	9.95498e-07	2.27602e-05
PRDM1	480	434	526	0.277368	2.90034	0.00372757	0.0282755
ATG5	1396.67	1287.33	1506	0.226336	3.09143	0.00199197	0.0168788
TMCC3	734.667	521	948.333	0.864111	4.62624	3.72362e-06	7.33154e-05
PITHD1	474.667	473	476.333	0.0101313	0.153815	0.877755	0.978157
MTA3	881.167	847.333	915	0.110842	1.78254	0.0746605	0.265889
USP13	53	47.333	58.667	0.309684	1.72387	0.0847316	0.276008
ATP11B	1554.17	1593.67	1514.67	-0.0733496	0.694232	0.487537	0.763478
LAMC2	290061	227249	352873	0.634876	4.19531	2.72498e-05	0.000426146
CDK14	1558.33	1676.33	1440.33	-0.218906	2.02236	0.043139	0.182388
SEC61A1	13223.8	11931	14516.7	0.282995	4.18952	2.79547e-05	0.000434853
PPP1R12A	1488.5	1421.33	1555.67	0.130288	1.74709	0.0806214	0.272284
RASGRF1	6.167	6.333	6	-0.0780025	0.158114	0.874367	0.97621
CAMK2B	1.167	1	1.333	0.415037	0.347935	0.727889	0.890202
CROCC	306	338	274	-0.302847	0.722394	0.470052	0.749373
POLR3E_ENSG00000058600	631.833	664.667	599	-0.150075	2.08275	0.0372742	0.163016
ATP2B4	2315	2329	2301	-0.0174497	0.110179	0.912268	0.998285
ZC3H11A	3.667	3.333	4	0.263034	0.426401	0.669815	0.858974
RIOK2	375	376.333	373.667	-0.0102592	0.122909	0.902179	0.991873
YIPF1	1192.33	1112	1272.67	0.194698	4.21934	2.45021e-05	0.000387381
NDC1	614.5	631.333	597.667	-0.0790608	0.709365	0.478098	0.755159
DGKG	4.333	4.333	4.333	0	0	1	1
FLYWCH1	2670.33	2999.67	2341	-0.357677	2.80677	0.00500406	0.0357881
UNKL	183.333	187.333	179.333	-0.062964	0.68629	0.49253	0.767531
TBXAS1	69.833	79.333	60.333	-0.394972	2.78463	0.00535885	0.0378125
PARP12	1354.5	1326.67	1382.33	0.0592996	0.729953	0.465419	0.745019
ALDH18A1	3070.33	2892.67	3248	0.167152	1.63325	0.102417	0.313019
TARBP1	290.167	291	289.333	-0.00828661	0.0816181	0.93495	1
GATB	532.5	533.333	531.667	-0.00451548	0.062454	0.950201	1
MXD1	850	659	1041	0.65962	5.39936	6.68807e-08	2.0293e-06
CDK17	1194.5	1159.33	1229.67	0.0849719	0.879498	0.379131	0.663527
DNAJC25	268.667	267.667	269.667	0.0107397	0.0629012	0.949845	1
SLC2A3	180.667	213.667	147.667	-0.533018	2.7497	0.00596503	0.0412346
PSD	15.5	20	11	-0.862496	2.59808	0.00937477	0.0582195
CTDP1_ENSG00000060069	1694.5	1739	1650	-0.0757919	0.971462	0.331318	0.612132
YBX3	10602.5	11484	9721	-0.240449	2.83855	0.00453194	0.0331206
STYK1	134.333	110	158.667	0.528496	2.74068	0.00613122	0.042038
WNK1	609	663.667	554.333	-0.259705	5.42612	5.75915e-08	1.78746e-06
CCAR1	1430.83	1276.33	1585.33	0.312781	2.74831	0.00599035	0.041351
OGFR	1775.67	1717	1834.33	0.0953658	0.567811	0.570164	0.807966
GNA15	3041.17	2831	3251.33	0.19972	1.89347	0.0582951	0.223327
CREB3L3	1.333	2.333	0.333	-2.80735	2.12132	0.0338949	0.152418
PIGV	888	855.333	920.667	0.106192	1.0601	0.289101	0.576712
PTPRU	4330.83	4949	3712.67	-0.414681	3.34547	0.000821441	0.00809332
SNRNP40	1228.5	1226.67	1230.33	0.00430597	0.0585911	0.953278	1
COL11A1	2.5	2	3	0.584963	0.77436	0.438718	0.720985
QSER1	171.167	175.667	166.667	-0.0758749	0.792406	0.428124	0.711789
MPC1	349.333	325.333	373.333	0.198546	1.23734	0.21596	0.482072
ACAA1	1579	1477.33	1680.67	0.186038	1.98741	0.0468766	0.191262
BCAT1	478.333	338	618.667	0.872139	10.6787	1.28089e-26	3.03371e-24
HDAC7	1454.67	1344.67	1564.67	0.218607	2.32641	0.0199965	0.103548
LZTS1	5.667	3.667	7.667	1.06413	1.15528	0.247978	0.522312
SPAG4	306.667	326	287.333	-0.182147	0.406868	0.684105	0.867353
NCKAP1	7251.33	7071.67	7431	0.0715061	0.600416	0.548229	0.801668
MRPS35	1250.67	1157.33	1344	0.215729	2.22271	0.0262357	0.126112
GUCY1B1	136.5	168.667	104.333	-0.692975	6.0193	1.75168e-09	7.0254e-08
SFSWAP	357.833	387.333	328.333	-0.238414	2.51129	0.0120291	0.0707449
TNK2	88.833	78.333	99.333	0.342652	1.96461	0.049459	0.199661
MON2	1018.83	1046	991.667	-0.0769557	2.08478	0.0370892	0.162382
CDH3	40784.2	38268.3	43300	0.178216	1.58639	0.112651	0.331276
ARSF	0.333	0.333	0.333	0	0	1	1
GPBP1	1195	1216	1174	-0.0507108	0.382011	0.702453	0.879883
DGAT2	161.5	162.667	160.333	-0.0208443	0.115239	0.908256	0.995503
ZNF112	139.333	132.333	146.333	0.145082	0.52454	0.599903	0.833075
CS	3560.17	3435.33	3685	0.101215	3.99938	6.35075e-05	0.000897605
LTK	0.833	1.333	0.333	-2	0.677312	0.498208	0.769032
MRPS24	25.833	28.333	23.333	-0.280108	1.05684	0.290585	0.578586
ELMO2	1643.67	1623	1664.33	0.0362814	0.592958	0.553209	0.801668
WAPL	1386.33	1356.33	1416.33	0.0624491	0.892758	0.371987	0.656487
VMP1	3103.17	2985	3221.33	0.109927	1.23348	0.217397	0.484119
APPBP2	899.667	871.333	928	0.0909001	1.25016	0.211242	0.474253
POLD1	718.333	787	649.667	-0.276664	2.89706	0.00376676	0.0285196
SEZ6	2	2	2	0	0	1	1
EIF4B	1155.33	1204.33	1106.33	-0.122449	0.928628	0.353082	0.63549
SLC6A16	4.167	4.333	4	-0.115477	0.130656	0.896048	0.988292
BICRA	28.167	25	31.333	0.32577	1.46154	0.143868	0.391048
SPHK2	294.333	274.667	314	0.193083	2.51344	0.0119558	0.070365
RPL18	3471	3406.67	3535.33	0.0534855	0.46883	0.639191	0.858974
CA11	74.333	90.667	58	-0.644519	3.3424	0.000830572	0.00817008
ISOC2	713.667	809.333	618	-0.389127	5.32272	1.02229e-07	2.9409e-06
U2AF2	118.5	120.333	116.667	-0.0446439	0.19341	0.846638	0.959211
EPN1	1300.83	1262.33	1339.33	0.0854221	1.0756	0.282108	0.567126
MED29	1441.83	1419.67	1464	0.0443633	0.883634	0.376894	0.661891
AHRR_ENSG00000063438	1.333	1.333	1.333	0	0	1	1
ZNF275	164.167	166.333	162	-0.0380835	0.16666	0.867638	0.97197
MTMR1	1219.33	1170	1268.67	0.116805	1.37708	0.168486	0.411846
GPC1	10635.2	11777	9493.33	-0.310985	3.67387	0.000238905	0.0028333
ADCK1	149.667	171.333	128	-0.420662	2.46191	0.0138199	0.0787884
HAGH	1503.5	1548.33	1458.67	-0.0860659	1.68038	0.0928841	0.294879
RNF4	2102.33	2006.67	2198	0.13139	2.06523	0.038901	0.1688
CASP8	409	369.667	448.333	0.278347	1.36128	0.173424	0.419752
LIMCH1	1762.67	2209	1316.33	-0.746869	18.0717	5.32114e-73	9.27209e-70
INTS13	676.833	674.333	679.333	0.0106577	0.123762	0.901504	0.991443
TM7SF3	9761.5	9509.33	10013.7	0.0745542	0.947677	0.343294	0.625441
DLX3	10.5	10.333	10.667	0.0458037	0.0971774	0.922586	1
SPA17	48.167	52.667	43.667	-0.270358	1.07613	0.281871	0.566878
TSPAN32	1	1.667	0.333	-2.32193	1.41421	0.157299	0.392529
CCN5	13	18.667	7.333	-1.34792	2.73768	0.00618746	0.0422928
DMRT3	6	2.667	9.333	1.80735	2.12579	0.0335211	0.152167
ST3GAL6	116	140	92	-0.605721	2.56011	0.0104639	0.063476
ATP2C2	139.5	102.667	176.333	0.780337	2.88294	0.0039398	0.0294459
NGFR	175.167	200	150.333	-0.411835	1.85874	0.0630635	0.234696
CDON	55.667	62.667	48.667	-0.364764	1.13819	0.255039	0.531676
TAF2	1049.83	1009.33	1090.33	0.111367	1.78674	0.0739794	0.263888
HIPK2	701.833	730	673.667	-0.115862	2.48914	0.0128052	0.0740411
TNPO3	2118.33	2167.67	2069	-0.0672093	0.618516	0.536235	0.801175
RFXANK	651.167	570.667	731.667	0.358538	3.11971	0.00181032	0.0156328
TMEM161A	801	896.333	705.667	-0.345048	5.44514	5.17643e-08	1.61482e-06
LPAR2	541.333	502.667	580	0.206451	0.807888	0.419155	0.702881
CTSA	5326.83	6030.67	4623	-0.383488	4.76627	1.87664e-06	4.01232e-05
SUGP2	892	923.667	860.333	-0.102477	0.97135	0.331374	0.612132
SLC12A2	969.667	838	1101.33	0.394229	5.14879	2.62166e-07	6.98204e-06
SNX24	377.667	299	456.333	0.609943	7.19594	6.20324e-13	4.16881e-11
EYA2	279.667	292.667	266.667	-0.134221	1.6315	0.102785	0.313821
CNN2	12255.8	11159	13352.7	0.25892	2.53055	0.0113885	0.0679016
ABCA7	1796.17	1947.67	1644.67	-0.243952	1.17732	0.239068	0.509791
SNCAIP	12.5	13.667	11.333	-0.270089	0.800097	0.423654	0.706474
DDX20	521.833	494.333	549.333	0.152198	1.36053	0.173663	0.420288
BTBD1	2576.17	2482.33	2670	0.105143	0.742972	0.457499	0.738357
FAR2	10	4.333	15.667	1.85415	3.95242	7.73649e-05	0.00106388
BCAS1	96.667	90	103.333	0.199309	1.08222	0.279153	0.563224
CHI3L2	56.5	55.333	57.667	0.0595888	0.337052	0.736078	0.896352
SBNO2_ENSG00000064932	1067.33	1113	1021.67	-0.123529	0.983341	0.32544	0.605545
PMS1	171.167	175.667	166.667	-0.0758749	0.396434	0.691785	0.872691
HMG20B	2073	2086.67	2059.33	-0.0190228	0.285815	0.77502	0.920904
CALCRL	92.667	106	79.333	-0.418065	3.39276	0.000691933	0.00701567
TAF11	324.667	292	357.333	0.291302	4.4408	8.96234e-06	0.000160408
ANKS1A	1079.67	1096.33	1063	-0.0445449	0.246994	0.804913	0.934462
AP3D1	3913.67	3890	3937.33	0.0174487	0.188796	0.850252	0.961564
ZNF76	888	911	865	-0.0747509	1.20421	0.22851	0.497857
SLC9A3R2	565.333	564	566.667	0.00680518	0.0804834	0.935853	1
NTHL1	356.5	393.333	319.667	-0.299184	3.30487	0.000950213	0.009155
UHRF1BP1	268.5	280	257	-0.123658	0.732786	0.463689	0.7437
GNAI3	4195	3689.33	4700.67	0.349505	7.09825	1.26342e-12	8.08955e-11
IPO5	2061.83	1892.33	2231.33	0.23774	4.09503	4.22117e-05	0.000626372
OAT	8585.17	7417	9753.33	0.39506	3.13811	0.00170041	0.0148307
WDR3	753.167	801.667	704.667	-0.186062	1.89027	0.0587221	0.223327
PKN2	1210.67	1190	1231.33	0.0492598	0.957826	0.338151	0.619326
WDR18	1791.5	1678	1905	0.183048	1.46939	0.141727	0.387965
TRAM2	880	1023.33	736.667	-0.474192	7.07277	1.5187e-12	9.5733e-11
NTN1	153.5	150.667	156.333	0.0532652	0.349073	0.727034	0.890202
GLP2R	30.333	34.333	26.333	-0.38272	0.622036	0.533918	0.798929
MCM10	0.667	1.333	0	#NAME?	1.74401	0.0811575	0.272284
DGKA	2930.33	2842.33	3018.33	0.0866764	1.03337	0.30143	0.593407
ERBB3	837.333	835	839.667	0.00804052	0.0483817	0.961412	1
ROPN1	0.667	1	0.333	-1.58496	0.586722	0.55739	0.801668
ANKRD44	43.833	42.333	45.333	0.0987782	0.483503	0.628739	0.855968
KARS1	3763.17	3732	3794.33	0.0238974	0.341945	0.732393	0.893568
ADAT1	703.667	726	681.333	-0.0916088	2.01692	0.0437039	0.184392
PDIA5	842.333	806.333	878.333	0.123392	1.55205	0.120651	0.346734
TBC1D22B	616.5	629.333	603.667	-0.0600722	1.00429	0.315237	0.595537
NDUFB4	2568.67	2427.67	2709.67	0.158545	1.53284	0.125316	0.356719
SPEN	872.333	898.667	846	-0.0871284	1.2109	0.225935	0.493989
MYLK	346.333	463.333	229.333	-1.0146	6.50446	7.79732e-11	3.89786e-09
ZC3H15	1117.33	1053	1181.67	0.166318	3.24068	0.00119246	0.0110837
MAP2K4	1337.5	1295.67	1379.33	0.0902765	1.17978	0.238086	0.50828
PACC1	623.333	578	668.667	0.210218	3.28997	0.001002	0.00958201
SNAP91	0.5	1	0	#NAME?	1.73205	0.0832645	0.272284
SLK	2595.5	2684.33	2506.67	-0.0987937	1.12682	0.25982	0.536918
CYB5R4	817.833	818.667	817	-0.00294008	0.0243209	0.980597	1
COL17A1	47705	43208.7	52201.3	0.272766	1.67994	0.0929682	0.294923
GSTO2	139.5	132.667	146.333	0.141453	0.729499	0.465696	0.745304
SEC61A2	192.333	203.333	181.333	-0.165203	0.855907	0.392049	0.676645
PRKCQ	153.833	142	165.667	0.222392	1.57075	0.116241	0.338549
TLE2	464.167	473	455.333	-0.0549171	0.409612	0.682091	0.865654
ASB1	724	661.333	786.667	0.250375	2.44156	0.014624	0.0816047
FAM107B	867.5	802.667	932.333	0.216045	2.16818	0.0301447	0.140474
ME1	796.833	840	753.667	-0.156463	1.85241	0.0639671	0.237155
TBC1D1	1183.83	1094.67	1273	0.217741	1.60757	0.107929	0.324052
CDK13	923.333	899	947.667	0.0760586	1.34135	0.179807	0.425616
MTHFD2	418	275	561	1.02857	5.33363	9.62711e-08	2.78262e-06
SLC9A7	1079.67	999	1160.33	0.215983	2.7522	0.0059196	0.0410602
FOXJ2	805.333	816	794.667	-0.0382193	0.441061	0.659169	0.858974
YBX1	2110.33	2066.67	2154	0.0597125	0.566278	0.571205	0.809207
PDE4A	320.667	408.667	232.667	-0.81266	1.83454	0.0665743	0.244333
PPP2R5A	480.833	513.667	448	-0.197334	1.46566	0.14274	0.389939
ELAVL1	2099.5	1985.33	2213.67	0.157057	3.76651	0.000165548	0.00205456
DIP2B	2044	2086.33	2001.67	-0.0597679	0.760074	0.44721	0.729076
SMARCD1	482.5	428.667	536.333	0.323274	6.00314	1.93541e-09	7.61523e-08
KDM4A	196.333	183.333	209.333	0.191333	1.55715	0.119436	0.344319
NFYC	766.667	766.667	766.667	0	0	1	1
ZMYND12	16.833	14.333	19.333	0.431716	1.09019	0.275628	0.558467
SLC9A3_ENSG00000066230	6.167	6.667	5.667	-0.234465	0.424791	0.670989	0.858974
NGEF	5.333	5.667	5	-0.180572	0.15107	0.879921	0.97937
ASPM	2	1.333	2.667	1	0.672464	0.501289	0.77159
ELOVL1	3926.5	3545	4308	0.281233	6.69912	2.09682e-11	1.13671e-09
SPI1	0.333	0	0.667	Inf	1.41421	0.157299	0.392529
ZNRD1_ENSG00000066379	190.333	187.333	193.333	0.0454828	0.386568	0.699076	0.878618
MPPED2	6.5	7.667	5.333	-0.523562	0.542272	0.587631	0.823703
CLDN18	0.833	0.333	1.333	2	1.199	0.230529	0.497897
ZBTB11	478.833	526.333	431.333	-0.287174	2.04188	0.0411633	0.176071
ATXN3	360.833	354.333	367.333	0.0519826	0.474898	0.63486	0.858974
GOLGA5	1605	1581	1629	0.0431492	0.76518	0.444164	0.726403
FGFR2	775	900.667	649.333	-0.472034	2.38359	0.0171446	0.0926953
LRRC40	376.5	320	433	0.436295	2.00273	0.0452061	0.186677
ISOC1	488	532.667	443.333	-0.264841	3.60143	0.000316475	0.00358755
EML1	72.5	81.333	63.667	-0.353309	1.75602	0.0790855	0.272284
TRMT11	327.167	341	313.333	-0.122073	1.63179	0.102723	0.313672
THUMPD1	873	882.333	863.667	-0.0308492	0.299689	0.764414	0.913688
MSANTD3	1160.83	1151.33	1170.33	0.0236139	0.28943	0.772252	0.919967
KIF26A	1.667	0.333	3	3.16993	2.03082	0.0422728	0.179722
ATG2B	266.333	293.333	239.333	-0.29352	1.91834	0.0550685	0.215288
ARFGEF1	1513	1602.33	1423.67	-0.170563	2.61475	0.00892921	0.0561961
ZFAT	210.167	249.333	171	-0.544079	4.61175	3.99298e-06	7.79912e-05
MTFR1	483.167	468.333	498	0.08861	0.510638	0.609604	0.840947
STAG3	7.5	5.667	9.333	0.719892	1.63978	0.10105	0.312436
FECH	674.833	637.667	712	0.159075	2.53646	0.0111978	0.0671843
MYO9A	362.333	355	369.667	0.0584059	0.63097	0.52806	0.793815
DDX3Y	1169.67	1298	1041.33	-0.317858	3.32	0.000900175	0.0087524
PFKP	10372.8	10542.3	10203.3	-0.0471537	0.368701	0.71235	0.883229
IDI1	1291.83	1229.67	1354	0.13896	0.447972	0.654173	0.858974
SP100	1773.5	1831	1716	-0.0935822	1.39747	0.162271	0.400993
KLF6	10482.3	9157	11807.7	0.366777	2.73968	0.00614988	0.042095
PLPP1	990	1147.67	832.333	-0.46347	6.00107	1.96019e-09	7.68791e-08
NEO1	531.5	650.333	412.667	-0.656202	12.3354	5.83971e-35	2.095e-32
TRAM1	16763.8	16728	16799.7	0.00616764	0.0345619	0.972429	1
PHKA1	742.667	775.667	709.667	-0.128295	1.80083	0.0717291	0.258316
TNFRSF1A	5573.5	5782.67	5364.33	-0.108336	1.08832	0.276455	0.559539
CACNB1	116.833	114	119.667	0.0699875	0.58086	0.561335	0.801668
EVI5	658.167	583.333	733	0.329493	3.61491	0.000300454	0.00344046
STOML1	562	469	655	0.481907	5.80644	6.38156e-09	2.35876e-07
PKM	123557	124836	122277	-0.0298809	0.815218	0.414948	0.69903
DHX29	704	705	703	-0.00409857	0.0479378	0.961766	1
DNTTIP2	1666.83	1683.33	1650.33	-0.0285634	0.283256	0.776981	0.921316
METTL22	465.833	442.333	489.333	0.145684	1.82177	0.06849	0.249651
TP53BP1	1534.5	1527.33	1541.67	0.0134759	0.165812	0.868305	0.972424
TRO	211.5	212.667	210.333	-0.0159164	0.11821	0.905901	0.994173
RRP15	183.333	162.667	204	0.326651	1.92687	0.0539954	0.212112
RHOA	11766.7	11157.3	12376	0.149553	5.50449	3.70241e-08	1.18375e-06
DHX8	1346	1419.67	1272.33	-0.158076	2.95908	0.00308561	0.0242661
PMS2P4	35.833	40.333	31.333	-0.364274	1.12862	0.259057	0.536022
PRKCZ	878.5	890.333	866.667	-0.0388684	0.406203	0.684593	0.867837
ZFY	367.333	345	389.667	0.175644	1.04857	0.294377	0.583705
IARS2	2755.67	2804.33	2707	-0.050963	2.07675	0.0378245	0.165115
SYT1	35.667	21	50.333	1.26112	3.5037	0.000458839	0.00492016
NAV3	11.5	8	15	0.906891	2.1234	0.0337204	0.152418
IDH3G	1529.5	1583.67	1475.33	-0.102228	1.79031	0.0734046	0.262605
ROGDI	649	612	686	0.164677	1.39009	0.164501	0.40523
PDZD4	0.833	0.667	1	0.584963	0.363232	0.716431	0.883229
ROCK1	1386.33	1376	1396.67	0.0215073	0.300148	0.764065	0.913425
CBFB	1578.5	1519	1638	0.108813	0.881244	0.378186	0.662396
PDK3	1109	1278	940	-0.443155	8.59462	8.35412e-18	9.75114e-16
HYAL2	2205.5	2323.33	2087.67	-0.154305	3.79142	0.000149787	0.00188881
HDAC4	163	182	144	-0.33787	1.17059	0.241764	0.513705
RASSF1	1567	1232.33	1901.67	0.625872	3.1352	0.0017174	0.0149415
FGFR3	469	552	386	-0.516067	2.44936	0.0143111	0.0806105
IFI35	419.5	446.667	392.333	-0.187119	1.42305	0.154723	0.392529
HEATR6	507	507	507	0	0	1	1
COASY	2685	2943	2427	-0.278113	4.37808	1.19732e-05	0.000207153
PLEKHH3	1165.5	1249.33	1081.67	-0.207902	4.01595	5.9207e-05	0.000842189
MEF2A	1021.17	1038.67	1003.67	-0.0494525	0.37072	0.710846	0.883229
OTUD5	1640.67	1617.33	1664	0.0410384	0.415302	0.677921	0.862432
TFE3	1804.33	1666.67	1942	0.220578	2.269	0.023268	0.115865
TBC1D25	760.667	783.333	738	-0.0860055	0.718712	0.472318	0.752002
ACSL4	1467.67	1400.67	1534.67	0.131812	0.706652	0.479783	0.755263
INPP5A	694.667	702.333	687	-0.0318458	0.704945	0.480845	0.756739
GPKOW	766.5	752.667	780.333	0.0520794	0.69295	0.488341	0.764344
GRIPAP1	721	685.333	756.667	0.142852	3.25365	0.00113934	0.0106654
FTSJ1	4486.33	4283	4689.67	0.130864	1.18569	0.235745	0.505335
PRR11	18.667	16	21.333	0.415037	1.41977	0.155675	0.392529
REEP1	4.333	3	5.667	0.917538	1.56893	0.116664	0.33946
ATP11A	643.5	622.667	664.333	0.0934473	0.324536	0.745532	0.901743
POLR1A	190.5	191.333	189.667	-0.0126221	0.040215	0.967922	1
LAPTM4A	9412.67	9322.33	9503	0.0276919	0.289203	0.772426	0.920129
TTC7A	2162	2221.67	2102.33	-0.0796509	0.717441	0.473102	0.752718
IP6K2	2085.5	2027.67	2143.33	0.0800357	2.25365	0.0242185	0.119283
SRBD1	334.833	309.333	360.333	0.22017	2.60291	0.00924355	0.057716
KIF2A	706.667	716.667	696.667	-0.0408337	0.462613	0.643642	0.858974
RASGRP2	14	17.667	10.333	-0.773724	2.319	0.0203948	0.105009
PSME4	627.833	610	645.667	0.0819803	0.662423	0.5077	0.778389
IFT80	84	81.333	86.667	0.0916305	0.377835	0.705553	0.879912
SIRT2_ENSG00000068903	1748.5	1939.33	1557.67	-0.316174	3.82925	0.000128535	0.00165466
ERLEC1	1859.83	1780.67	1939	0.122895	0.708331	0.47874	0.755159
PPP2R5B	1923.33	1580.33	2266.33	0.520131	4.53872	5.65977e-06	0.00010629
PYGM	1.167	1	1.333	0.415037	0.250942	0.801859	0.932026
PITX1	2335.17	2322	2348.33	0.0162692	0.130296	0.896332	0.988429
MAST4	1116.83	1050.67	1183	0.171145	1.05461	0.291603	0.579903
ADGRF5	6.5	9	4	-1.16993	2.40192	0.0163092	0.089299
SDK2	896	1022	770	-0.408465	1.94547	0.051719	0.206191
NUP133	909.833	884	935.667	0.0819483	0.808313	0.418911	0.702767
NUCKS1	1126.67	1076.67	1176.67	0.128134	1.19498	0.232095	0.499997
VPS35	5797.83	5673	5922.67	0.062135	0.882991	0.377241	0.662262
DNAJA2	2506.67	2513	2500.33	-0.00729023	0.105166	0.916244	1
BCL3	1986.17	2189.33	1783	-0.296185	2.5992	0.00934404	0.0581351
KCNAB2	70.5	83	58	-0.517058	2.3708	0.0177494	0.094997
ABCC9	36	44.667	27.333	-0.708537	2.66221	0.00776287	0.050527
GAL	15.167	15.667	14.667	-0.0951572	0.213052	0.831286	0.950655
CLEC2D	18.833	20	17.667	-0.17897	0.58653	0.557519	0.801668
FUNDC1	236.5	228.667	244.333	0.0956046	0.374794	0.707814	0.881691
MAOB	39.5	53.333	25.667	-1.05514	2.45204	0.0142049	0.0805775
RORA	228.5	229.333	227.667	-0.010523	0.108998	0.913204	0.998862
DRD4_ENSG00000069696	0.667	0	1.333	Inf	1.74401	0.0811575	0.272284
TGFBR3	51	78	24	-1.70044	6.29207	3.13256e-10	1.43915e-08
PLA2G10_ENSG00000069764	26.5	37.333	15.667	-1.25277	3.9711	7.15422e-05	0.000994458
HES2	3985.33	3591.67	4379	0.285948	2.80489	0.0050333	0.0359448
ATP1B3	5969.83	7276	4663.67	-0.641681	4.88365	1.04141e-06	2.36768e-05
NEDD4	665.5	641	690	0.106272	1.90103	0.0572984	0.221942
PIGB	462	429.667	494.333	0.202266	3.45308	0.000554229	0.00578537
MAPK6	1644.17	1624.33	1664	0.0348077	0.264588	0.791327	0.92908
GNB5	942.167	1023	861.333	-0.248163	2.5687	0.0102081	0.0622257
RAB27A	354.167	329.333	379	0.202649	1.72342	0.0848135	0.276201
HDHD5	1154.67	1156.33	1153	-0.00416483	0.0907531	0.927689	1
UFD1	1470	1296.67	1643.33	0.341817	5.51434	3.50101e-08	1.12378e-06
LRP6_ENSG00000070018	486.5	497.333	475.667	-0.0642622	0.847147	0.396913	0.682072
GUCY2C	0.667	0.333	1	1.58496	1	0.317311	0.595537
PHRF1_ENSG00000070047	2198.5	2221	2176	-0.0295308	0.295746	0.767424	0.916013
ELP1	1791.33	1802.67	1780	-0.0182554	0.267439	0.789131	0.927216
NUCB2	575.667	575.333	576	0.00167075	0.0195414	0.984409	1
PFN2	3116	2810.67	3421.33	0.283646	2.13422	0.0328251	0.149872
PTPN3	1980.5	2152.33	1808.67	-0.250975	3.91702	8.96487e-05	0.00120828
SPTB	2	1	3	1.58496	1.35458	0.175551	0.423573
DAPP1	2327.67	1231.33	3424	1.47546	15.8297	1.94248e-56	1.75507e-53
SLC44A1	3092.67	3276.67	2908.67	-0.171871	2.48387	0.0129965	0.0749525
TMEM260	270	254.667	285.333	0.164038	1.22275	0.221426	0.489682
SMG6	329.667	313.667	345.667	0.140149	1.20936	0.226525	0.494813
EXOC5	1782	1660.33	1903.67	0.197308	1.74777	0.0805031	0.272284
CLTCL1	388.667	391.667	385.667	-0.0222719	0.297329	0.766215	0.91501
FGF22	2.167	1.667	2.667	0.678072	0.473024	0.636196	0.858974
FSTL3	9871.5	8195.67	11547.3	0.494627	4.11262	3.91195e-05	0.000586192
DGCR2	7435.17	7484.67	7385.67	-0.0192099	0.169866	0.865115	0.970717
RNF126	1739.83	1594	1885.67	0.242423	2.46678	0.0136333	0.0779067
MNT	48.5	40.333	56.667	0.490528	2.74778	0.00599996	0.041394
ZXDC	775	762.667	787.333	0.0459219	0.342185	0.732212	0.893512
JMJD6	841.5	805	878	0.125232	0.626802	0.530789	0.796228
POLB	759.167	642	876.333	0.448906	5.333	9.66056e-08	2.78899e-06
ST6GALNAC1	1982.33	1946.67	2018	0.0519203	0.274048	0.784048	0.924181
WIPI1	701.5	641	762	0.249467	3.70859	0.00020842	0.00251454
FRMPD1	1.5	1.667	1.333	-0.321928	0.170953	0.86426	0.970221
GBA2	1542.17	1487.33	1597	0.102636	1.76011	0.07839	0.272284
NDST1	3916.33	4030.33	3802.33	-0.0840142	0.456476	0.648048	0.858974
ASNS	4	3.667	4.333	0.241008	0.195052	0.845352	0.958333
AP3M2	531	510	552	0.114171	1.59134	0.111534	0.328807
CNGB1	14	15.667	12.333	-0.345135	1.09109	0.275234	0.557853
ST6GALNAC2	1226.83	1307.67	1146	-0.190388	4.39188	1.12376e-05	0.000195956
PABPC1	4628.5	4687.67	4569.33	-0.0368863	0.333162	0.739012	0.897176
TESK2	72.167	91	53.333	-0.770829	5.1352	2.81842e-07	7.48154e-06
CFAP20	783	737.667	828.333	0.167242	2.48906	0.0128081	0.0740411
CSNK2A2	221.5	240.667	202.333	-0.250302	1.23846	0.215545	0.48139
PTPN21	393.833	358	429.667	0.263258	2.90831	0.00363385	0.0277371
EIF2B3	530.5	493.667	567.333	0.200659	2.40453	0.0161934	0.0888324
CAMK2A	1.167	1.333	1	-0.415037	0.377964	0.705457	0.879883
TCOF1	993	1064.67	921.333	-0.208607	2.13143	0.0330539	0.150523
CDC42	1773.17	1686.67	1859.67	0.140869	1.87465	0.0608411	0.228658
OSBPL3	1687.67	1661.33	1714	0.0450255	0.625222	0.531825	0.797068
EPHA8	0.5	0.667	0.333	-1	0.423359	0.672033	0.858974
RAD18	211	211	211	0	0	1	1
ATP2B1	441.333	410	472.667	0.205199	2.40397	0.0162183	0.0889288
NCK2	2049.67	2098.67	2000.67	-0.0689922	2.24615	0.0246945	0.120944
MAP4K4	4279.5	4024.33	4534.67	0.172247	2.15219	0.0313822	0.144912
MGAT4A	286.5	308.667	264.333	-0.223691	1.39402	0.163311	0.402949
RPL31	2948.5	2859.67	3037.33	0.0869583	1.1058	0.268814	0.548857
WDR1	18700.2	17614.3	19786	0.16773	1.44065	0.149684	0.392529
SNX13	919.833	939	900.667	-0.0601319	0.476253	0.633894	0.858974
ARHGAP10	370.5	394.667	346.333	-0.188473	3.02195	0.00251152	0.0204161
RPS6KA2	969.667	792	1147.33	0.534712	4.38914	1.13801e-05	0.000197875
ING3	166.167	152	180.333	0.246595	1.04779	0.294736	0.58418
VASH1	9.833	12	7.667	-0.646363	0.977056	0.328541	0.608886
LMCD1	73.167	66	80.333	0.283533	0.990663	0.32185	0.600928
BUD23	1611.67	1607.33	1616	0.00775805	0.148458	0.881981	0.980511
SEL1L	4091.83	3832.67	4351	0.182998	2.84418	0.00445263	0.0326486
TRIP13	78.333	70	86.667	0.308122	1.3687	0.171092	0.41617
ATP6AP1	7971	8871.33	7070.67	-0.327305	6.02975	1.64217e-09	6.62925e-08
TCF3	3406.83	3324.67	3489	0.0696039	0.826176	0.408704	0.694894
TRIB2	841.333	987.667	695	-0.507011	8.10242	5.38773e-16	5.17456e-14
DAZAP1	365	324	406	0.325486	4.75911	1.9445e-06	4.11771e-05
MBD3	844.5	870.667	818.333	-0.0894319	1.10153	0.270664	0.551847
HLTF	497.167	541	453.333	-0.255056	1.7767	0.075618	0.268437
FAM50A	1623.33	1657	1589.67	-0.0598493	0.454846	0.64922	0.858974
FAM3A	864.667	890.333	839	-0.0856748	0.603244	0.546346	0.801668
CPSF1_ENSG00000071894	2014.67	2123.33	1906	-0.155783	5.60076	2.13416e-08	7.17119e-07
MYO3B	19.833	23.667	16	-0.564785	1.15002	0.250134	0.525221
CYBRD1	1362.83	1766	959.667	-0.87988	8.31664	9.04945e-17	9.64024e-15
CDH19	6.333	3.667	9	1.29546	1.32263	0.18596	0.435908
PDCD2	961.167	892	1030.33	0.207996	2.44154	0.014625	0.0816047
SLC6A15	600.833	864	337.667	-1.35543	2.45625	0.0140395	0.0798728
RDH11	2399.17	2333	2465.33	0.0795964	0.922206	0.356421	0.639754
PRKACA_ENSG00000072062	89.667	93.667	85.667	-0.128802	1.0313	0.302401	0.594397
ADGRL1_ENSG00000072071	174.667	193.333	156	-0.309544	1.4696	0.141671	0.387965
ACTN1	30681.3	29317.7	32045	0.128329	1.21097	0.225908	0.493989
ZFYVE26	423.333	466.333	380.333	-0.294097	2.68593	0.00723275	0.0478944
RPS6KA6	142.333	151	133.667	-0.175909	1.04009	0.298297	0.588797
EPN2	707.167	704.667	709.667	0.0102006	0.0677044	0.946021	1
PTPN18	752.667	771.333	734	-0.0715744	0.831035	0.405954	0.691796
LIMS2	56.333	40.333	72.333	0.842688	4.26753	1.97651e-05	0.00031953
SPEG	190.167	199.333	181	-0.139193	1.53675	0.124356	0.354514
LNX1	247.5	283.333	211.667	-0.420706	3.12272	0.00179189	0.0155011
ALDH3A2	1330.33	1575.33	1085.33	-0.537519	7.61451	2.64694e-14	2.13815e-12
TFRC	8257.17	6367.33	10147	0.672292	7.97975	1.46628e-15	1.34981e-13
SREBF1	3093.5	2865.67	3321.33	0.212892	2.00083	0.0454109	0.186677
TRPC5	0.833	0.667	1	0.584963	0.281498	0.778328	0.921316
AFF4	1235	1167	1303	0.159033	1.87473	0.0608304	0.228653
UBE2D1	1369.5	1444.33	1294.67	-0.157823	0.849161	0.395792	0.680864
MPP5	695.833	640.333	751.333	0.23063	2.58169	0.00983169	0.0604598
RHOBTB1	303.667	298	309.333	0.05385	0.524888	0.599661	0.832955
SMC1A	837.667	851.333	824	-0.0470798	0.441939	0.658534	0.858974
HSD17B10	1084.5	956.333	1212.67	0.342598	3.25879	0.00111889	0.0105063
MARK2	1887.33	1828	1946.67	0.0907398	0.786345	0.431665	0.714477
HMMR	2.333	1.667	3	0.847997	0.614474	0.538902	0.801668
CHFR	1035.5	995.333	1075.67	0.111979	2.17022	0.0299902	0.139861
TRHDE	1	1.333	0.667	-1	0.415247	0.677961	0.862432
P4HA2	9044.17	7557.67	10530.7	0.478584	4.75619	1.97279e-06	4.17038e-05
NFATC3	355.167	398	312.333	-0.349682	5.24898	1.5294e-07	4.22534e-06
TRNT1	524.667	515	534.333	0.0531676	0.464189	0.642512	0.858974
ACADVL	14211.3	13669	14753.7	0.110166	0.90714	0.364333	0.64866
STK10	2286.67	2380.33	2193	-0.118258	1.02993	0.303042	0.595272
FBXW11	2148.5	2248.33	2048.67	-0.134171	1.61515	0.106279	0.320597
ACAP1_ENSG00000072818	40.5	42	39	-0.106915	0.483762	0.628555	0.85586
CRMP1	21	18	24	0.415037	1.5667	0.117185	0.340533
EVC	272.833	269.333	276.333	0.0370168	0.358472	0.71999	0.885967
DERL2	1322.83	1230.67	1415	0.201362	2.37097	0.0177415	0.0949757
SIDT1	184.5	216.333	152.667	-0.502871	5.00162	5.68507e-07	1.39105e-05
NDE1_ENSG00000072864	422.833	451.333	394.333	-0.194778	2.72396	0.00645042	0.043747
MRVI1	28.5	27	30	0.152003	0.682288	0.495057	0.767909
TMEM38A	445.333	530	360.667	-0.555326	5.91283	3.36288e-09	1.2899e-07
AP1M1	2165.17	2217	2113.33	-0.0690884	0.86549	0.38677	0.671453
PVR	2912.33	2639	3185.67	0.271604	2.84151	0.00449005	0.0328933
XRCC1	330	345	315	-0.131245	1.39168	0.164018	0.404245
SCARB1	1239.17	1461.33	1017	-0.522966	5.91312	3.35686e-09	1.28962e-07
MCM2	199.333	206.667	192	-0.106199	0.710768	0.477228	0.755159
MOV10L1	7.833	7.667	8	0.0614005	0.0920316	0.926673	1
PANX2	40.5	47.333	33.667	-0.491536	2.04183	0.0411688	0.176071
SELENOO	1139	1248.67	1029.33	-0.278678	2.26048	0.0237916	0.117564
TP63	3932.17	4078	3786.33	-0.10706	0.808116	0.419024	0.702814
ALPK1	404.833	441	368.667	-0.258462	4.40297	1.06778e-05	0.000187129
LLGL2	2850.5	2512	3189	0.344268	2.1721	0.0298479	0.13933
PDE8A	1026.83	834	1219.67	0.548368	7.20994	5.59783e-13	3.77235e-11
CLCN4	200.5	201.667	199.333	-0.0167897	0.0953839	0.92401	1
NLE1	241	216.333	265.667	0.296361	2.61485	0.00892674	0.0561961
SDHA	461.833	519.667	404	-0.363231	5.38298	7.32639e-08	2.1876e-06
SMARCE1	50	51	49	-0.0577155	0.218826	0.826786	0.949515
FNDC8	0.667	1.333	0	#NAME?	1.74401	0.0811575	0.272284
GSDMB	42.833	48	37.667	-0.349746	1.67649	0.0936421	0.296367
KDM5A	1526.33	1548.67	1504	-0.0422221	0.69315	0.488215	0.764197
ADAM11	0.333	0.667	0	#NAME?	1.41421	0.157299	0.392529
PPP2R3A	439.333	408.667	470	0.201736	2.1637	0.0304877	0.141639
FERMT2	440.333	419.667	461	0.135523	1.79532	0.0726033	0.260541
ABCB11_ENSG00000073734	7.333	7.333	7.333	0	0	1	1
DHRS9	1715.5	1661	1770	0.0916973	2.93901	0.00329258	0.0255722
PTGS2	9988.33	7604.67	12372	0.702122	4.16218	3.15225e-05	0.000485474
IGF2BP2	1579.17	1487	1671.33	0.168595	5.08343	3.70683e-07	9.49875e-06
MAP3K13	923.167	832.667	1013.67	0.283772	3.98369	6.7853e-05	0.000953021
ST6GAL1	1592.5	1818.67	1366.33	-0.412572	4.91284	8.97677e-07	2.07179e-05
VDAC1P1	3.333	2.667	4	0.584963	0.76433	0.44467	0.726865
FRY	42.167	68.333	16	-2.09452	8.31144	9.45448e-17	9.9845e-15
PICALM	1790.67	1620.67	1960.67	0.274757	3.26752	0.00108495	0.0102348
NSF_ENSG00000073969	1442.5	1444.67	1440.33	-0.00433392	0.105727	0.915799	1
GLI2	2.5	3	2	-0.584963	0.774597	0.438578	0.720985
CLASP1	1405.83	1464	1347.67	-0.119452	0.607579	0.543467	0.801668
MRPS34	1028.83	1091	966.667	-0.174561	2.2889	0.022085	0.111453
NOTCH3	6558.5	6917.33	6199.67	-0.158025	0.931906	0.351385	0.63393
CLNS1A	1106.67	1114	1099.33	-0.0191203	0.333914	0.738445	0.897125
PPP2R2C	5.5	8.333	2.667	-1.64386	1.75322	0.0795637	0.272284
TEAD2	883.333	851.667	915	0.103483	1.15395	0.248522	0.522601
EED	393.167	407	379.333	-0.101563	1.69846	0.0894202	0.287233
CDHR2	9.833	13	6.667	-0.963474	1.6398	0.101046	0.312436
SNCB	0.5	1	0	#NAME?	1.73205	0.0832645	0.272284
TSG101	2812.83	2670.33	2955.33	0.146301	2.25134	0.0243642	0.119831
NCBP3	449.667	416.667	482.667	0.212134	2.04259	0.0410931	0.176026
ATP2A3	4	6	2	-1.58496	2.03394	0.0419577	0.178657
CA12	1921.17	2293.33	1549	-0.566109	3.09923	0.00194026	0.0165417
MGLL	3816.33	3746.67	3886	0.0526783	0.393362	0.694052	0.874423
NTN4	11163.3	9818	12508.7	0.349427	2.7248	0.00643395	0.0436596
BCS1L	471.333	484.667	458	-0.0816453	0.963164	0.335465	0.615843
NUAK1	466.5	412.333	520.667	0.336549	2.99353	0.0027577	0.0221005
DPP8	1327.67	1314	1341.33	0.0297025	0.337391	0.735822	0.896085
SLC24A1	63.667	63	64.333	0.0302146	0.0927724	0.926084	1
ZNF532	623.5	593.333	653.667	0.139712	2.36114	0.0182188	0.096661
SCARF1_ENSG00000074660	11.667	7.333	16	1.12553	1.07127	0.284048	0.57013
LMAN1	3255.83	3232.33	3279.33	0.0208266	0.133212	0.894026	0.986787
HACD3	2853.67	3059	2648.33	-0.207975	1.98043	0.0476551	0.193629
ZZEF1	250.833	253	248.667	-0.0249243	0.071174	0.943259	1
ENO1	55648.7	57965.7	53331.7	-0.120206	1.16324	0.244732	0.518204
MYDGF	4386.83	4066.33	4707.33	0.211182	3.10334	0.00191352	0.0163618
ANO8	23	22.667	23.333	0.0418202	0.118559	0.905624	0.994003
TUBE1	172.5	149	196	0.395541	2.44309	0.014562	0.0813836
ARHGEF10L	1936	2047.67	1824.33	-0.166612	2.28355	0.0223981	0.112558
TXK	5.333	6.333	4.333	-0.547488	0.951414	0.341394	0.623237
KCNQ2_ENSG00000075043	1.833	2.667	1	-1.41504	0.709777	0.477842	0.755159
TACR2	6.833	5	8.667	0.793549	1.71655	0.0860608	0.278904
ACTR6	421	393.333	448.667	0.189892	0.713743	0.475386	0.754802
TIPIN	68.333	64	72.667	0.183222	0.983568	0.325328	0.605478
SRI	3265	3080	3450	0.163666	5.91627	3.29315e-09	1.26914e-07
EIF4G3	1614	1714.33	1513.67	-0.1796	3.46338	0.000533434	0.00560427
NUP37	315.833	280	351.667	0.328782	3.37264	0.000744512	0.00744054
SEMA3A	517.167	412.667	621.667	0.591164	11.0301	2.73655e-28	7.1783e-26
GTSE1	16	14.667	17.333	0.241008	0.76277	0.445601	0.727583
SEMA3C	10190	8584	11796	0.458576	3.02765	0.00246466	0.0200954
TTC38	511.667	540	483.333	-0.159941	2.92452	0.00344986	0.0265822
ACAT1	397.5	435	360	-0.273018	2.41414	0.0157725	0.0868752
GRAMD4	939.333	1016.67	862	-0.238087	3.0629	0.00219206	0.0182385
CELSR1	2093.5	2295	1892	-0.278582	1.02383	0.305916	0.595537
ZNF638	1429	1467.67	1390.33	-0.0780935	1.32921	0.183777	0.432788
SLC25A40	130.5	141	120	-0.232661	2.22434	0.0261256	0.125768
TIMM21	703.5	672.333	734.667	0.127913	0.838512	0.401743	0.688228
ADD2	0.833	0.333	1.333	2	1.34164	0.179712	0.425474
RASAL2	728.5	781.333	675.667	-0.209626	1.74997	0.0801236	0.272284
VPS9D1	239.5	232	247	0.0903862	0.656353	0.511597	0.781833
ZNF37A	342.833	316.667	369	0.220656	1.41172	0.158031	0.393506
MARK3	2249.17	2239.67	2258.67	0.0121873	0.330228	0.741228	0.89872
SLC25A3	7110.17	6749.67	7470.67	0.146421	5.89476	3.75223e-09	1.42801e-07
FNDC3B	7482.33	7417.67	7547	0.0249378	0.464388	0.64237	0.858974
FOSL2	5686.5	5582.67	5790.33	0.052692	0.372028	0.709872	0.883176
CACNG4	107.833	93.667	122	0.381274	2.20101	0.0277356	0.131687
FRYL	967.667	1003.33	932	-0.106399	0.93521	0.34968	0.631986
TMEM131	1231.17	1259	1203.33	-0.0652419	1.35916	0.174096	0.421043
FSCN1	6039.33	5495.33	6583.33	0.260611	1.86124	0.0627104	0.233739
ACTB	330310	284089	376531	0.406424	3.78643	0.000152824	0.00192172
MOCOS	308	267.667	348.333	0.380031	2.51451	0.0119199	0.0702153
PLD1	689.333	715.333	663.333	-0.108882	1.40997	0.158548	0.39435
ATP12A	1300.5	1420.33	1180.67	-0.266628	0.686625	0.492319	0.767531
WDR62	13.833	19.333	8.333	-1.21412	3.14404	0.00166633	0.0145699
DLG1	4533.5	3895	5172	0.409099	5.75549	8.63932e-09	3.10392e-07
RAB7A	7827.5	7692.33	7962.67	0.0498304	1.23519	0.216761	0.483221
BCAP29_ENSG00000075790	16.167	15.333	17	0.148863	0.507673	0.611683	0.842911
SEC31B	17.667	19.667	15.667	-0.328054	0.531776	0.594881	0.828507
SART3	636.833	648.333	625.333	-0.0521103	0.526107	0.598814	0.832226
TUBA3D	1	1.667	0.333	-2.32193	1.41421	0.157299	0.392529
EXOSC7	628.167	675.667	580.667	-0.218601	4.51076	6.45952e-06	0.000119535
KIFAP3	875.5	851	900	0.0807659	0.999338	0.317631	0.595537
MKRN2	1132	1098.33	1165.67	0.0858393	2.35752	0.0183973	0.097354
MCM6	125	131.333	118.667	-0.146318	0.942592	0.34589	0.627499
REXO2	1940.33	1846.33	2034.33	0.139893	1.20115	0.229692	0.497897
RBM7	841.833	764.333	919.333	0.266386	1.49698	0.134398	0.37376
RBMS2	965.167	865	1065.33	0.300533	5.52857	3.22843e-08	1.0487e-06
BAZ2A	1557.5	1677.67	1437.33	-0.223061	1.73658	0.082462	0.272284
PTPN23	391.167	420.333	362	-0.215544	1.60143	0.109281	0.326224
MLH1	633.833	605.333	662.333	0.129828	2.30723	0.0210419	0.107366
UNG	901.833	1007.67	796	-0.340178	3.66794	0.000244508	0.00288432
FMO4	89	90	88	-0.0324215	0.249351	0.803089	0.933055
KLHL20	633.667	604.667	662.667	0.132143	1.7902	0.073421	0.262625
RGS11	1.333	0.667	2	1.58496	1.22926	0.218976	0.485631
SLC46A1	114.833	129	100.667	-0.357785	2.00065	0.0454301	0.186677
PLXNA2	1280.33	1402.67	1158	-0.276537	1.56337	0.117966	0.341902
SPAG5	18.333	25.333	11.333	-1.16046	2.17121	0.0299155	0.139592
ANKRD13A	1712.5	1785.33	1639.67	-0.122791	2.30231	0.0213176	0.108591
TPD52	1988	1814.67	2161.33	0.252217	0.963472	0.335311	0.615833
ACACB	16	20.333	11.667	-0.801454	2.65361	0.00796349	0.051602
TRAF4	1789.17	1606.33	1972	0.295888	5.03171	4.86112e-07	1.21255e-05
PAG1	163.833	218.667	109	-1.00441	6.71161	1.92485e-11	1.04581e-09
GPATCH1	206.833	215	198.667	-0.113987	1.10182	0.270538	0.551683
NT5C2	1633	1463.33	1802.67	0.300874	5.33381	9.61705e-08	2.78262e-06
MCAM	708.333	557.667	859	0.623255	2.55061	0.0107535	0.0648533
GPC4	435.5	400.333	470.667	0.233504	2.52211	0.0116652	0.0690377
MBNL3	67.667	63.333	72	0.185032	0.594343	0.552283	0.801668
CAMSAP3	974.5	977	972	-0.00740225	0.0669976	0.946584	1
RAP1GAP	72.833	63.667	82	0.365086	2.63101	0.00851323	0.0540975
XAB2	400.833	421.333	380.333	-0.147698	2.17058	0.0299626	0.139759
ARHGEF1	2044.5	2050.33	2038.67	-0.00823257	0.0594521	0.952592	1
STXBP2	1894.17	1852.67	1935.67	0.0632272	1.05939	0.289421	0.577047
MAP2K7	71	75.333	66.667	-0.176323	1.19548	0.231899	0.499751
DGKD_ENSG00000077044	280.167	302	258.333	-0.225315	1.34723	0.177907	0.425474
CTTNBP2	117.667	109	126.333	0.212907	0.885776	0.375738	0.660908
RARB	875.5	1007.67	743.333	-0.438937	3.94738	7.90096e-05	0.0010804
TOP2B	2063.83	2063	2064.67	0.00116506	0.0449321	0.964161	1
TM9SF3	7885	7809.33	7960.67	0.0276899	0.172535	0.863017	0.969394
NFKB2	1414.83	1010.33	1819.33	0.848579	5.76214	8.3055e-09	2.99723e-07
UBE2T	165.833	170.667	161	-0.0841206	0.581654	0.560799	0.801668
PPP1R12B	569.5	657.667	481.333	-0.45032	3.18965	0.00142444	0.0128036
DNAJC10	3085	2538.33	3631.67	0.51675	4.79296	1.64336e-06	3.54463e-05
GTF3C1	3542.33	3725.33	3359.33	-0.149195	1.18291	0.236846	0.506431
IL4R	3934.83	3891	3978.67	0.0321441	0.300281	0.763963	0.913349
USP33	1277.17	1249.67	1304.67	0.0621379	0.995788	0.319353	0.597669
PAK3	19.667	14.333	25	0.802554	2.00378	0.0450937	0.186677
CAPN6	12	17.333	6.667	-1.37851	3.77124	0.000162441	0.00202387
SNRPA	367	312.333	421.667	0.433016	4.21959	2.44743e-05	0.000387193
SPAG6	18	12	24	1	3.4641	0.000532006	0.00559408
EXOSC5	393.667	463	324.333	-0.513535	2.72635	0.00640396	0.0435166
DYNC1I2	2303.5	2084.67	2522.33	0.274942	2.96239	0.00305263	0.0240611
LRCH4	289.667	298	281.333	-0.0830318	0.516151	0.605749	0.83795
FAM76B	148	150	146	-0.0389941	0.269551	0.787506	0.926506
SIRT6	78.5	58	99	0.771376	5.03616	4.74958e-07	1.18959e-05
POLD3	262.667	275	250.333	-0.135581	1.24085	0.214661	0.479987
ACTN2	0.833	0.667	1	0.584963	0.256503	0.797563	0.930164
CAPZB	4805.33	4460	5150.67	0.207715	3.80271	0.000143123	0.00181315
GPR137B	641.833	663.667	620	-0.0981906	2.11098	0.0347739	0.155181
NAALAD2_ENSG00000077616	0.5	0	1	Inf	1.73205	0.0832645	0.272284
JADE1	168.833	215	122.667	-0.809593	3.18829	0.00143116	0.0128534
SLC25A43	543.333	505.667	581	0.200351	3.95822	7.55112e-05	0.00104132
UBE2A	2783.17	2618	2948.33	0.171435	1.83713	0.0661908	0.243298
FGFR1	70.333	66.333	74.333	0.164275	0.924035	0.355468	0.638842
FKBP6	0.667	0.333	1	1.58496	0.586722	0.55739	0.801668
FBLN1	9353.17	10775	7931.33	-0.442053	2.42858	0.015158	0.0840791
MAP2	655.167	525.667	784.667	0.577932	3.85625	0.000115142	0.00150449
PIAS2	1346.5	1388.33	1304.67	-0.0896727	1.20584	0.227878	0.496913
AMPH	5.333	5.667	5	-0.180572	0.167898	0.866664	0.971522
ARAF	2428.33	2640.67	2216	-0.252944	3.40621	0.000658711	0.00672073
MCCC1	341.833	392.333	291.333	-0.429409	6.20171	5.58543e-10	2.44187e-08
LAMP3	120.167	117.333	123	0.0680454	0.268979	0.787946	0.926506
FAP	1451.83	1426.33	1477.33	0.0506842	0.219547	0.826224	0.94913
NEBL	1094	992.333	1195.67	0.268919	1.76606	0.0773864	0.272284
ACER3	627.333	579	675.667	0.222748	1.14015	0.254225	0.530524
UBE2K	1514	1446.33	1581.67	0.129046	1.19834	0.230785	0.498274
PIK3C3	626.667	604	649.333	0.104411	1.75553	0.0791682	0.272284
N4BP2	97	103.333	90.667	-0.188662	0.702596	0.482308	0.758454
TIGAR	188.833	172.667	205	0.247634	2.87038	0.00409985	0.0304369
TULP3	659.667	597	722.333	0.274934	2.59436	0.00947661	0.0586458
SYNJ2	699.167	777	621.333	-0.322547	1.55137	0.120814	0.346994
ADCY2	1	1.333	0.667	-1	0.742247	0.457938	0.738357
PPP2R5C	1646.5	1596.33	1696.67	0.0879412	0.802017	0.422543	0.705927
PMS2P1	179.5	185.333	173.667	-0.0938015	0.568694	0.569564	0.807445
GNB1	11812.2	11030	12594.3	0.191342	3.39185	0.000694218	0.00703419
HOXA9	0.333	0	0.667	Inf	1.41421	0.157299	0.392529
EDN1	2730	1872.33	3587.67	0.938209	9.26826	1.89208e-20	2.97789e-18
MLLT10	145.833	145.333	146.333	0.0098928	0.0731698	0.941671	1
ZCWPW1	65.167	66.333	64	-0.0516621	0.354005	0.723335	0.888346
FGF20	0.333	0.333	0.333	0	0	1	1
ITM2A	56	64.333	47.667	-0.432586	1.31155	0.189671	0.442058
NRDC	3550.83	3788.33	3313.33	-0.19328	3.07152	0.00212974	0.0178172
VDAC3	2677.33	2560.33	2794.33	0.126172	2.48279	0.0130359	0.0751442
PCM1	1167.67	1202.33	1133	-0.0856891	2.48501	0.0129548	0.0747472
TNRC6C	22.333	19.667	25	0.346176	1.38187	0.167011	0.409306
CBFA2T2	680.333	771.333	589.333	-0.388271	3.82521	0.000130661	0.00167409
BRINP1	179.667	253.667	105.667	-1.26341	7.10969	1.16305e-12	7.52592e-11
ITCH	1088.67	1136.33	1041	-0.126416	1.19492	0.232119	0.500004
PKD2L2	0.833	0	1.667	Inf	1.88982	0.0587817	0.223327
TP53INP2	949.5	941.333	957.667	0.0248179	0.239146	0.810993	0.938821
SDF4	4909.5	5127	4692	-0.127912	1.52842	0.126407	0.35903
MYH7B	1.667	1	2.333	1.22239	1.26491	0.205903	0.467431
TP73	45.167	65.333	25	-1.38589	7.35023	1.97871e-13	1.42391e-11
TOLLIP	4400.33	4384.67	4416	0.010273	0.183165	0.854669	0.964198
UBE2D4	162.5	147	178	0.276061	2.65469	0.00793812	0.0514754
CLUL1	9.667	10.667	8.667	-0.29956	0.787839	0.430791	0.713597
THOC1	250.833	260	241.667	-0.105493	1.41773	0.156269	0.392529
FKBP7	83.667	84.667	82.667	-0.0344884	0.248677	0.80361	0.933394
OSBPL6	143.333	150.667	136	-0.147754	1.48072	0.138682	0.382449
SLC1A3	454.167	639	269.333	-1.24642	4.09642	4.19582e-05	0.000622988
XRCC5	7845	7529.33	8160.67	0.116165	2.61135	0.00901847	0.0565567
LXN	914.833	1287.33	542.333	-1.24713	4.76756	1.86468e-06	3.99376e-05
SP140	5.333	6.333	4.333	-0.547488	1.06066	0.288844	0.576295
MKNK1	806.333	807.667	805	-0.00477122	0.0677956	0.945948	1
TNS1	219.667	292	147.333	-0.986885	5.11842	3.08107e-07	8.07544e-06
REXO1	225.833	227	224.667	-0.0149062	0.065256	0.94797	1
SAR1A	1200	1139	1261	0.146801	1.47006	0.141547	0.387965
CDC14A	68.667	59.333	78	0.394631	2.75892	0.00579924	0.0403638
RAPGEF3	564.5	561	568	0.0178902	0.0577822	0.953922	1
CEACAM1	1348	1513.67	1182.33	-0.356411	6.97155	3.13461e-12	1.88347e-10
SENP1	327.167	320.667	333.667	0.0573332	0.880247	0.378726	0.66315
DUSP13	5.167	5.667	4.667	-0.280108	0.538816	0.590014	0.825515
CIC	306	313.667	298.333	-0.072307	0.273272	0.784644	0.92466
LIPE	52.5	54	51	-0.0824622	0.238489	0.811502	0.939072
FDFT1_ENSG00000079459	6408.67	6037.67	6779.67	0.167223	1.22846	0.219273	0.48614
PAFAH1B3	929	902	956	0.0838832	0.904745	0.365601	0.649171
OPHN1	22.5	22.667	22.333	-0.0213737	0.0860663	0.931414	1
KIF22	277.167	303	251.333	-0.269716	0.853106	0.3936	0.678293
CARMIL1	463	497	429	-0.212268	1.62056	0.105112	0.318294
PGM1	5128.83	5609	4648.67	-0.270927	3.26895	0.00107946	0.0101949
DDX1	3013.33	2930.67	3096	0.0791766	1.26279	0.206663	0.468613
DNM2	6670.5	6771.67	6569.33	-0.043764	0.560898	0.574867	0.812461
EPB41L2	250.5	218.333	282.667	0.372569	2.20329	0.0275742	0.131125
RIMS1	3.167	5.333	1	-2.41504	2.4427	0.0145778	0.0814009
MOXD1	23.333	18.333	28.333	0.628031	2.53546	0.0112299	0.0672938
STX7	1869	1783.33	1954.67	0.132346	1.37503	0.169123	0.412657
RABL2B	243.167	233.333	253	0.116745	1.02898	0.303489	0.595537
KEAP1	2965.83	3228.67	2703	-0.256377	2.36332	0.0181121	0.0963464
DDX43	40.5	39.667	41.333	0.0593785	0.276969	0.781804	0.922739
PTPRH	140.667	113	168.333	0.574998	3.98025	6.88415e-05	0.000964058
SLC35C2	1420.17	1408.33	1432	0.0240427	0.329716	0.741615	0.898976
CRYBG3	374.667	357	392.333	0.136156	2.13901	0.0324352	0.148621
RFX3	64.833	68	61.667	-0.141044	0.65513	0.512384	0.782734
RIF1	694.333	680.333	708.333	0.0581867	0.572599	0.566916	0.804893
RAB21	1512.67	1400	1625.33	0.215309	1.22026	0.222368	0.490921
SLC4A4	37.5	53	22	-1.26849	4.02096	5.79611e-05	0.000827361
SMARCA2	1378	1528.33	1227.67	-0.31604	5.17144	2.32299e-07	6.22055e-06
SESN1	421.667	446.667	396.667	-0.171271	1.4913	0.135883	0.376688
MID2	483	527.667	438.333	-0.267598	2.22364	0.0261727	0.125908
COL5A3	0.667	0.333	1	1.58496	0.586722	0.55739	0.801668
SRCAP	35.5	38	33	-0.203533	0.591232	0.554365	0.801668
PUM3	781	751.667	810.333	0.108422	0.922618	0.356206	0.639694
CHRNA3	12.333	15	9.667	-0.633872	1.85996	0.0628909	0.234268
KCNN2	3	3.333	2.667	-0.321928	0.435635	0.663102	0.858974
CNOT4	684	658.667	709.333	0.106915	1.49354	0.135295	0.375784
PSEN1	4380	4017	4743	0.239681	5.25174	1.50668e-07	4.17677e-06
CPOX	582.667	557	608.333	0.127185	1.7499	0.0801348	0.272284
CLDND1	1976.67	1791.67	2161.67	0.270842	2.24624	0.0246888	0.120944
MOK	114.667	115.667	113.667	-0.0251639	0.186209	0.852281	0.962654
HSP90AA1	6274	6052.67	6495.33	0.101833	1.38737	0.16533	0.406463
RBL1	53.333	52	54.667	0.0721498	0.39555	0.692437	0.87308
DLGAP4	974.333	858	1090.67	0.346161	8.1863	2.69388e-16	2.67143e-14
IGSF9B	2.833	0.667	5	2.90689	1.48525	0.137478	0.379686
CROCCP3	28	32	24	-0.415037	1.21834	0.223096	0.491993
NDC80	1.167	1.667	0.667	-1.32193	1	0.317311	0.595537
AP4E1	508.333	488.333	528.333	0.113582	1.12981	0.258554	0.53546
RSBN1	328.333	348.333	308.333	-0.175978	2.22469	0.0261018	0.125691
MAGI3	370.167	388.333	352	-0.14172	1.38579	0.16581	0.406934
CXCL2	1722.33	1092.33	2352.33	1.10668	3.63691	0.000275933	0.00320237
AFP	2	1.333	2.667	1	0.775298	0.438164	0.720985
COL4A4	69.5	87	52	-0.742504	2.31068	0.0208507	0.106793
TCF7	43	33.333	52.667	0.659925	3.1765	0.00149062	0.0133249
OSTM1	2053	2127	1979	-0.104048	0.653205	0.513624	0.783851
CDH7	3.333	4	2.667	-0.584963	0.462124	0.643992	0.858974
IMPG2	0.5	0.667	0.333	-1	0.423359	0.672033	0.858974
PCNP	2360.67	2244.33	2477	0.142307	0.681283	0.495692	0.768663
EXD2	1222	1169.67	1274.33	0.123645	1.76616	0.0773697	0.272284
ARG2	85	72	98	0.444785	2.78978	0.00527442	0.0373496
MEF2C	19.833	20	19.667	-0.0242475	0.0723948	0.942288	1
PKP1	1720.17	1393	2047.33	0.555551	2.34957	0.0187952	0.0990944
UBA5	916	865.667	966.333	0.158709	2.15188	0.0314068	0.14497
STK17B	467.5	440.333	494.667	0.167861	0.951345	0.341429	0.623254
CDC14B	352.167	366.333	338	-0.116134	1.18551	0.235817	0.505335
ZNF510	86.667	89.333	84	-0.0888093	0.616558	0.537526	0.801668
LRP2	1.333	0	2.667	Inf	2.82843	0.00467773	0.0338917
ZNF506	257.5	255.333	259.667	0.0242789	0.129355	0.897077	0.989026
JMJD4	267.833	242.667	293	0.271925	3.53078	0.000414343	0.00451649
DUSP12	422.667	396	449.333	0.182286	2.72008	0.00652658	0.0441408
AACS	1560.5	1506.67	1614.33	0.0995782	1.39336	0.16351	0.403237
DELE1	590.667	593.333	588	-0.0130267	0.175007	0.861074	0.968371
CADPS2	87.833	111	64.667	-0.779466	3.17606	0.00149292	0.0133308
PCDHB4	6.667	7	6.333	-0.14439	0.142079	0.887017	0.983047
PCDHA6	2.333	1.333	3.333	1.32193	1.60357	0.108809	0.325375
PCDHGA2	30.333	26.333	34.333	0.38272	0.942353	0.346012	0.627646
HSPB11	535.833	531.333	540.333	0.0242325	0.20344	0.838791	0.955246
PHLPP1	116.5	135.333	97.667	-0.470579	4.19135	2.77301e-05	0.000433084
ATP8B1	1325.17	1381.67	1268.67	-0.123097	1.95599	0.0504665	0.202289
IL12RB2	78	89	67	-0.409644	1.65301	0.0983278	0.306387
SMARCD3	195.333	234.333	156.333	-0.583937	3.34452	0.000824251	0.00811773
WDR70	398.833	355.667	442	0.313521	4.91222	9.00514e-07	2.0727e-05
FYB1	1919.5	2400	1439	-0.737968	5.72804	1.01597e-08	3.60767e-07
STRADB	405.333	410.667	400	-0.0379679	0.278209	0.780852	0.92254
BZW1	6192.83	6269.67	6116	-0.0358003	0.607899	0.543255	0.801668
PGR	0.667	0.667	0.667	0	0	1	1
C1QTNF3	1.333	2	0.667	-1.58496	1.4134	0.157537	0.392529
ME2	925.833	928.333	923.333	-0.00779135	0.0887721	0.929263	1
C5orf22	966.667	950.333	983	0.0487578	0.445395	0.656034	0.858974
CCNT2	805.333	827.333	783.333	-0.0788424	0.41563	0.677681	0.862432
FAM135A	577.5	574.333	580.667	0.0158219	0.117223	0.906684	0.994584
EPB41L3	7	7.333	6.667	-0.137504	0.288308	0.773111	0.920586
COBLL1	885.667	879.333	892	0.0206336	0.286493	0.7745	0.920904
DLG3	887.333	843	931.667	0.144281	1.36495	0.172268	0.418157
KCNK2	4.167	6	2.333	-1.36257	1.69485	0.090103	0.288497
SERTAD4_ENSG00000082497	182.167	197.667	166.667	-0.246104	1.09731	0.272505	0.554395
TRAF5	263.667	292.667	234.667	-0.318646	3.16078	0.00157346	0.0139428
MRPL22	1062.5	1010.67	1114.33	0.140874	1.86668	0.0619468	0.231423
GEMIN5	567.5	607.333	527.667	-0.202862	1.60618	0.108234	0.324748
NFE2L1	1819.5	1843.67	1795.33	-0.0383261	0.503802	0.6144	0.844839
SEMA5B	78.333	109	47.667	-1.19328	3.56622	0.000362161	0.00402865
GSK3B	1290.33	1321	1259.67	-0.0685884	0.868038	0.385374	0.670078
ITGB5	6822.17	6821.67	6822.67	0.000211472	0.00181747	0.99855	1
ERC1	1089.33	1090.67	1088	-0.00353169	0.0273788	0.978158	1
XPO1	1326.33	1399.67	1253	-0.159697	1.11612	0.264372	0.54315
LINC01587	3	3.333	2.667	-0.321928	0.471405	0.637352	0.858974
RNF13	1618.33	1662.33	1574.33	-0.0784687	0.961003	0.336551	0.616934
TRPM3	1.333	2	0.667	-1.58496	0.864919	0.387083	0.671518
PALB2	294.167	301	287.333	-0.0670381	0.765857	0.443761	0.72606
DOP1A	318.833	313	324.667	0.0527966	0.461215	0.644644	0.858974
LYRM2	580.667	527.333	634	0.265768	2.12325	0.0337332	0.152418
BCKDHB	380.5	376.333	384.667	0.0315977	0.138216	0.89007	0.984416
KAT6A	418	458.333	377.667	-0.279284	1.58156	0.113751	0.33341
TUT7	968.5	978.333	958.667	-0.0292968	0.346312	0.729108	0.891067
ULK2	710.167	760.333	660	-0.204166	4.30587	1.66329e-05	0.000275571
GRHL2	997	1008	986	-0.0318361	0.494655	0.620844	0.849977
TNPO1	2593.67	2594.67	2592.67	-0.00111248	0.0118507	0.990545	1
PLOD1	6467.83	6176.33	6759.33	0.13013	1.28492	0.198822	0.457528
P2RX5	23.167	31	15.333	-1.0156	3.55797	0.000373738	0.00414424
ITGAE	401.333	379.333	423.333	0.158328	1.42129	0.155233	0.392529
DIS3	1086.5	1036.33	1136.67	0.133321	1.42419	0.154392	0.392529
PIBF1	204.333	206	202.667	-0.0235355	0.151501	0.87958	0.979252
TDRD3	112.167	111	113.333	0.0300126	0.214638	0.83005	0.950019
NUFIP1	162.5	168.333	156.667	-0.103623	1.1209	0.262332	0.540414
PDS5B	691.333	743.667	639	-0.21884	3.4296	0.000604469	0.00624567
OXCT1	239.5	225.333	253.667	0.170873	1.60171	0.10922	0.326082
RRAGB	256.167	284.333	228	-0.318549	2.9657	0.00301995	0.023859
CYLD	1868.83	1804.67	1933	0.0991093	2.9882	0.00280626	0.0224088
SLC27A5	42.833	50.333	35.333	-0.510484	2.13159	0.0330403	0.150489
ZNF324	397.5	408.667	386.333	-0.0810784	0.609535	0.54217	0.801668
ZNF671	126	127	125	-0.0229004	0.14482	0.884853	0.981985
ZNF416	205.5	184.333	226.667	0.298255	2.13244	0.032971	0.150398
ZNF586	113.167	96.667	129.667	0.423717	2.48195	0.0130664	0.0752667
ZNF446	98.833	103.333	94.333	-0.131466	0.52216	0.601559	0.834615
ZNF264	160	154.333	165.667	0.102234	0.517085	0.605097	0.837333
RPS5	2860.67	2830.67	2890.67	0.0302604	0.339823	0.73399	0.894743
FAT1	3120	3344.67	2895.33	-0.208133	1.21534	0.224235	0.493288
YTHDC1_ENSG00000083896	261.167	279.667	242.667	-0.204732	2.13188	0.0330166	0.150437
CHMP2B	1592.33	1511	1673.67	0.147509	1.50019	0.133564	0.372291
SMAP2	820	864	776	-0.154975	1.61961	0.105316	0.318638
PPIE	1375.83	1418.67	1333	-0.0898589	0.857634	0.391095	0.676143
ZMPSTE24	2828.83	2606	3051.67	0.22776	1.92872	0.0537659	0.211448
STARD7	3296.67	3312.33	3281	-0.0137123	0.594989	0.551851	0.801668
NOA1	430.833	452.333	409.333	-0.14411	2.03476	0.0418751	0.178467
REST	1603.67	1509.33	1698	0.169925	2.7517	0.00592861	0.041111
HAL	38.167	51.667	24.667	-1.06667	1.91796	0.0551155	0.215437
SSH1	1140	1221.67	1058.33	-0.207057	0.814167	0.415549	0.69956
GSTP1	42600.2	39838.3	45362	0.187327	3.14974	0.00163413	0.0143501
APLP2	34459	36869.3	32048.7	-0.202157	4.01684	5.89826e-05	0.000839487
FAM234B	129.5	144	115	-0.324435	3.1073	0.00188803	0.0161665
WBP11	1294.67	1321.67	1267.67	-0.0601829	1.47649	0.139814	0.384701
EIF3I	5579.83	5319.67	5840	0.134633	5.2833	1.26875e-07	3.56992e-06
NKAIN1	1.167	0.667	1.667	1.32193	0.518042	0.604429	0.836741
COL16A1	1345.67	1508.33	1183	-0.350505	2.7305	0.0063238	0.0430439
TXLNA	2548.5	2623	2474	-0.0843723	1.12351	0.261219	0.539124
APOB	1.333	1.667	1	-0.736966	0.441847	0.6586	0.858974
NCOA1	531.667	580.333	483	-0.264859	3.70339	0.000212739	0.00255645
AGBL5	916.167	1019	813.333	-0.325235	4.5395	5.63871e-06	0.000105976
EFR3B	6.667	4	9.333	1.22239	1.70289	0.0885896	0.285149
KIF3C	1639.83	1626.33	1653.33	0.0237546	0.301501	0.763033	0.91261
RAB10	8512	8040.67	8983.33	0.159936	2.3113	0.0208161	0.106683
GCKR	3.167	0.667	5.667	3.08746	3.22903	0.0012421	0.0114517
HADHA	6482	6318	6646	0.0730184	1.55848	0.119119	0.343692
MAPRE3	610.333	610.667	610	-0.00157585	0.03305	0.973635	1
CAD	1121	1193	1049	-0.185579	0.836376	0.402943	0.689472
CD59	16424.8	15297	17552.7	0.198441	1.30009	0.193569	0.448871
CD82	7556.33	7171	7941.67	0.147267	2.0798	0.0375436	0.163989
BCORL1	144.167	144.333	144	-0.00333571	0.0280162	0.977649	1
ATRX	1023.67	1019.33	1028	0.0122144	0.0865466	0.931032	1
AK6_ENSG00000085231	432	437.333	426.667	-0.0356239	0.484787	0.627828	0.855491
FCN1	0.333	0.333	0.333	0	0	1	1
MYNN	282.333	281.333	283.333	0.0102198	0.0674113	0.946254	1
MECOM	629.333	693.333	565.333	-0.294447	2.85892	0.00425087	0.0313862
SCAMP1	2417.67	2381	2454.33	0.0437636	0.211614	0.832408	0.951574
PREP	3440	3155	3725	0.2396	6.16226	7.17138e-10	3.07462e-08
HACE1	337.167	319.667	354.667	0.149895	1.77289	0.0762467	0.270237
SEH1L	912.833	859.667	966	0.168246	1.7461	0.0807934	0.272284
WDR47	1676.67	1612.67	1740.67	0.110192	1.16911	0.242361	0.514569
WDFY1	1544.5	1545	1544	-0.000934086	0.00517298	0.995873	1
OVGP1	47.833	67.667	28	-1.27302	3.05651	0.00223929	0.0185745
SLC25A24_ENSG00000085491	1975.17	1807	2143.33	0.24626	1.70918	0.0874185	0.282423
MAP3K4	693.333	739.667	647	-0.19311	1.84356	0.0652472	0.240766
PILRA	7.333	7	7.667	0.131245	0.207742	0.83543	0.953465
IGSF9	600	542.333	657.667	0.278177	1.8888	0.058919	0.223438
ABCB1	0.833	1	0.667	-0.584963	0.363232	0.716431	0.883229
ZNF213	365	353.333	376.667	0.0922585	1.02024	0.307614	0.595537
AKR1B1	29875.2	40157	19593.3	-1.03529	3.91748	8.94787e-05	0.0012068
CPNE3	2589	2681	2497	-0.102575	0.649584	0.515961	0.786041
RRN3_ENSG00000085721	800.833	763.667	838	0.134007	1.00538	0.314713	0.595537
CTTN_ENSG00000085733	4194	3891.67	4496.33	0.208361	3.88242	0.000103421	0.00137416
WNT11	11.5	15.333	7.667	-1	2.62109	0.00876483	0.0554651
MTIF2	451.167	440.333	462	0.0692968	0.378268	0.705231	0.879883
DDHD2	1300.67	1258	1343.33	0.0946854	1.13515	0.25631	0.532834
TTC39A	485.333	553.667	417	-0.40897	2.9325	0.00336241	0.0259905
EPS15	675.667	660.333	691	0.0654912	1.36575	0.172018	0.417752
ORC1	13.5	15.333	11.667	-0.394279	0.724303	0.46888	0.748108
MGST2	690.5	714.667	666.333	-0.101026	1.32407	0.185479	0.435386
CHERP	458.333	446	470.667	0.077662	0.971643	0.331228	0.612132
ATG16L1_ENSG00000085978	977.667	990.667	964.667	-0.0383692	0.553573	0.579871	0.815893
USP40	801.5	833.333	769.667	-0.11466	1.50504	0.132314	0.369806
POMGNT1	4368.83	4659.67	4078	-0.192365	1.97215	0.0485925	0.196815
RAD54L	2.5	2.667	2.333	-0.192645	0.252423	0.800714	0.932026
MAST2	1346.67	1512.67	1180.67	-0.357492	2.48752	0.0128636	0.074309
DNAJA1	5130.17	4864.33	5396	0.149648	2.20992	0.0271105	0.129352
B4GALT1	4071.5	3792.67	4350.33	0.197913	2.61518	0.00891807	0.0561773
CHMP5	2833.83	2813.33	2854.33	0.0208733	0.137842	0.890365	0.984653
NFX1	1129.5	1167.67	1091.33	-0.0975367	2.18138	0.0291552	0.136803
DIMT1	590.5	658.667	522.333	-0.334578	5.19699	2.02539e-07	5.44757e-06
IPO11	731	673.667	788.333	0.226771	2.85985	0.00423837	0.0313129
FOLH1	19	24	14	-0.777608	2.80976	0.00495789	0.0355519
EIF2AK1	3176	3320.33	3031.67	-0.131217	2.10142	0.0356037	0.157919
EPDR1	1456.33	1433.33	1479.33	0.045573	0.554301	0.579373	0.815427
SNX10	92.333	74	110.667	0.580624	1.84285	0.0653516	0.241006
SEPHS1	1248.83	1251.67	1246	-0.00654634	0.188969	0.850117	0.961545
MRPL28	2682.83	2704	2661.67	-0.0227652	0.265711	0.790462	0.928288
HBQ1	3	3	3	0	0	1	1
ITPKC	6276.83	6289	6264.67	-0.00559289	0.0498339	0.960255	1
CEACAM6	30008.8	33927.7	26090	-0.378965	5.18499	2.1603e-07	5.79765e-06
FAT2	785.5	1100.33	470.667	-1.22516	4.04322	5.27212e-05	0.000762832
RBM22	926.833	861.667	992	0.20321	2.68826	0.00718259	0.047614
TMED2	9431.17	8723.33	10139	0.216964	1.79097	0.0732985	0.262418
ERO1B	226.167	245.667	206.667	-0.249396	1.46101	0.144014	0.391314
ZFAND6	3206.17	2926.33	3486	0.252478	3.56611	0.000362323	0.00402865
HSD17B2	740	1003.33	476.667	-1.07375	7.29373	3.01486e-13	2.11343e-11
TXLNG	219.5	214	225	0.0723142	0.44646	0.655265	0.858974
PPEF1	1.5	1.333	1.667	0.321928	0.257092	0.797108	0.930164
LAT2	21.833	14	29.667	1.08342	3.8921	9.93788e-05	0.00132261
HUWE1	1258.5	1298	1219	-0.0905923	0.682864	0.494693	0.767531
ZW10	544.833	486.333	603.333	0.31101	3.82055	0.000133157	0.00170428
ALG9	65.167	68.667	61.667	-0.155119	1.06202	0.288229	0.57567
NOX4	28	29.333	26.667	-0.137504	0.521265	0.602182	0.834862
ACOX3	1007.83	1044	971.667	-0.103588	1.19424	0.232384	0.500442
MTMR2	1526.67	1397.67	1655.67	0.244392	4.21169	2.53465e-05	0.000399437
PPP1R15A	4928.5	4512	5345	0.244423	1.23513	0.216783	0.483225
HSD17B14	156.167	224	88.333	-1.34247	6.51036	7.49695e-11	3.76313e-09
TRIP6	3232.33	3141.67	3323	0.0809562	1.25327	0.210108	0.472713
ACHE	71	45.667	96.333	1.07689	3.72086	0.000198547	0.00241333
FTL	44796	62213.3	27378.7	-1.18417	4.32961	1.49372e-05	0.00025096
SRRT	1704	1692	1716	0.02032	0.209038	0.834419	0.952979
BAX	669.5	725.333	613.667	-0.241189	1.42698	0.153586	0.392529
NLK	64	59.333	68.667	0.210767	0.979605	0.327281	0.60789
PIGS	1808.17	1869.33	1747	-0.0976442	0.675842	0.499141	0.770034
TMPRSS11E_ENSG00000087128	92.833	34.667	151	2.12293	14.7876	1.76111e-49	1.16114e-46
ATXN7L3	354.667	379.667	329.667	-0.203725	1.28774	0.197835	0.45586
PGS1	838.5	892.667	784.333	-0.186655	1.96727	0.0491523	0.198653
PSMC5	2669.5	2483.67	2855.33	0.201188	2.17411	0.0296965	0.138901
UIMC1	378.833	396.667	361	-0.135928	1.15335	0.248767	0.523026
MMP2	7315.5	8060.33	6570.67	-0.2948	1.45909	0.144542	0.392311
MT3	11.833	10	13.667	0.450661	1.23274	0.217672	0.484258
LPCAT2	1445.33	1426	1464.67	0.0385984	0.471355	0.637387	0.858974
GNAO1	2.167	2.667	1.667	-0.678072	0.432425	0.665433	0.858974
OGFOD1	1151.5	1068	1235	0.209599	4.18997	2.78986e-05	0.000434853
SH3BP2	1061.17	1119.67	1002.67	-0.159227	1.50974	0.131111	0.36837
NOP14	468.333	505.333	431.333	-0.228432	1.32718	0.184448	0.433864
ADD1	5938.33	5888.67	5988	0.0241332	0.470848	0.63775	0.858974
L2HGDH	85	85.333	84.667	-0.0113153	0.0387239	0.96911	1
TXNDC16	58.667	67	50.333	-0.412647	2.12989	0.0331806	0.151015
RTRAF	1508.67	1429	1588.33	0.152508	2.14283	0.0321268	0.147457
NID2	9.667	12.667	6.667	-0.925999	1.38533	0.165952	0.407201
GMCL1	858.667	897.333	820	-0.13002	0.795361	0.426404	0.70951
SF3B2	4437	4407.67	4466.33	0.0190758	0.405227	0.685311	0.86841
KLHL42	383.833	401.667	366	-0.134155	1.96235	0.049722	0.200061
GNAS	13099.2	14101.3	12097	-0.221182	2.21848	0.0265221	0.127088
DNM1L	1669.33	1538	1800.67	0.227476	2.12374	0.0336916	0.152418
PTHLH	12925.5	11569	14282	0.303934	2.04528	0.0408273	0.17501
PHACTR3	81.5	71.333	91.667	0.361821	1.45138	0.146675	0.392529
ERGIC2	1261.83	1184.67	1339	0.176675	0.838939	0.401504	0.687925
TFAP2C	365.167	371.333	359	-0.048731	0.438222	0.661225	0.858974
AURKA	170.5	159.333	181.667	0.189246	1.29998	0.193609	0.448921
CASS4	2	2.667	1.333	-1	0.775298	0.438164	0.720985
PIR	223.167	267.333	179	-0.57868	3.37142	0.000747819	0.00746747
AAMDC	138	123.333	152.667	0.307822	2.22058	0.0263795	0.126579
RFX2	215.833	228.333	203.333	-0.167295	1.46514	0.142883	0.39011
METTL2A	246.5	236	257	0.122981	1.50312	0.132807	0.37052
SULT2B1	109.667	108.667	110.667	0.0263113	0.0993473	0.920863	1
ALG6	292	310	274	-0.178092	1.46626	0.142579	0.389759
CNOT3_ENSG00000088038	507.5	493.333	521.667	0.0805655	1.05609	0.290927	0.578983
GP6_ENSG00000088053	1.833	0.667	3	2.16993	1.05329	0.292209	0.580302
PTPN4	235.833	273.333	198.333	-0.462734	5.16457	2.40989e-07	6.44554e-06
DDX18	1230.67	1207	1254.33	0.0554951	0.475788	0.634225	0.858974
KHSRP	685	691.667	678.333	-0.0280825	0.2868	0.774265	0.920904
GNA11	913.5	909.333	917.667	0.013161	0.250235	0.802405	0.932527
ASAP3_ENSG00000088280	378.333	451.667	305	-0.566449	9.23506	2.5814e-20	3.98565e-18
EDEM2	1199	1137.33	1260.67	0.148532	1.50163	0.133192	0.371381
DNMT3B	27	23	31	0.430634	0.718683	0.472336	0.752002
TPX2	108.333	106.333	110.333	0.0532748	0.312632	0.75456	0.908207
FER1L4	69.333	61.333	77.333	0.334419	1.53149	0.125649	0.357375
PDRG1	770.333	729	811.667	0.154969	3.16952	0.00152689	0.0135988
EPB41L1	600	698	502	-0.47554	9.39388	5.78286e-21	9.34257e-19
SLC15A1	39	31.333	46.667	0.574694	2.27167	0.0231066	0.115155
DOCK9	1773.33	1832.33	1714.33	-0.0960343	0.629247	0.529188	0.795069
ANKRD10	573.167	667.333	479	-0.478382	4.6997	2.60543e-06	5.34563e-05
TGDS	269	250.667	287.333	0.196955	1.57479	0.115306	0.33663
DOCK3	26	23.667	28.333	0.259644	1.1209	0.262332	0.540414
C3orf18	232.167	265.333	199	-0.415037	3.39113	0.00069606	0.00703996
COQ9	1250.5	1324.33	1176.67	-0.170561	2.72874	0.00635764	0.043238
TMEM40	2299.67	1918	2681.33	0.483348	7.33536	2.21133e-13	1.57735e-11
KIF9	48.5	38	59	0.634716	3.39181	0.000694336	0.00703419
ARHGAP28	23.333	19.667	27	0.457207	1.827	0.0676997	0.247421
CRLS1	352.333	354	350.667	-0.0136491	0.190593	0.848844	0.960715
PPP1R13B	308.833	325.667	292	-0.157428	2.28871	0.0220963	0.111487
ATRN	1249.17	1311.33	1187	-0.143715	1.73828	0.0821608	0.272284
SMOX	524	441.667	606.333	0.457153	0.660563	0.508893	0.779243
FKBP1A	2802.33	2431	3173.67	0.384601	9.20956	3.27453e-20	4.96163e-18
NSFL1C	2767	2651.33	2882.67	0.120686	1.38232	0.166874	0.409012
SLC4A11	872.167	842.333	902	0.0987362	0.782611	0.433856	0.716679
C20orf194	233	219	247	0.17358	1.73061	0.0835222	0.27298
ZNF343	212.833	185.333	240.333	0.374914	2.69315	0.00707807	0.0471131
EBF4	69	86.333	51.667	-0.740684	4.76683	1.87145e-06	4.00474e-05
CPXM1	0.667	1	0.333	-1.58496	1	0.317311	0.595537
MAVS	2299.83	2266.67	2333	0.0416141	0.32804	0.742881	0.89999
LZTS3	1610	1670.33	1549.67	-0.108178	1.51254	0.130397	0.367028
XRN2	1726.67	1732	1721.33	-0.00891243	0.235018	0.814195	0.940672
KIZ	186.333	183.333	189.333	0.0464593	0.377768	0.705603	0.87993
DYNLL1	7528.33	6895.33	8161.33	0.243185	3.7203	0.000198988	0.00241748
TESC	4.333	0.667	8	3.58496	1.86836	0.0617116	0.230827
SNX5	942	1025.67	858.333	-0.256952	2.94146	0.00326668	0.0254035
RPL6	1523.5	1412	1635	0.211551	1.49732	0.134311	0.37376
SIRPG	4.833	5.333	4.333	-0.29956	0.289953	0.771852	0.919581
MAPKAPK5	940	917	963	0.0706141	1.83755	0.0661285	0.243246
P2RX7	12.167	18.333	6	-1.61143	3.95003	7.81409e-05	0.00107213
ESF1	249.167	277	221.333	-0.323665	1.83275	0.0668404	0.244993
RBBP9	607.5	621	594	-0.0641303	0.384571	0.700555	0.879661
ANAPC5	3968.83	3972.33	3965.33	-0.00254454	0.06013	0.952052	1
SLC23A2	555.5	579.333	531.667	-0.123872	1.69842	0.0894283	0.287233
SLC8B1	1703.67	1837.67	1569.67	-0.227417	1.30107	0.193234	0.448179
TMEM230	2760.17	2800	2720.33	-0.0416434	0.686685	0.492281	0.767531
DZANK1	70.167	61.667	78.667	0.351262	2.0618	0.0392266	0.16994
KDM2B	372.167	357.667	386.667	0.112475	1.33155	0.183008	0.431482
CFAP61	1.333	0.667	2	1.58496	0.864919	0.387083	0.671518
LHX5	3.167	2.667	3.667	0.459432	0.688247	0.491297	0.767298
TASP1	347.833	324.333	371.333	0.195238	1.6647	0.0959722	0.301279
OAS1	888.5	931.333	845.667	-0.139209	0.737048	0.461093	0.741585
GCN1	5159.17	5301	5017.33	-0.0793438	0.475547	0.634397	0.858974
RPLP0	6077	6479.33	5674.67	-0.19131	1.24041	0.214823	0.480182
PXN	4916.33	5104.33	4728.33	-0.110391	0.974047	0.330033	0.610908
SIRT4	23.5	27.333	19.667	-0.474909	1.93695	0.0527515	0.208603
KIF16B	609.667	658.333	561	-0.230817	4.18014	2.91324e-05	0.000451514
TRMT6	552.667	545	560.333	0.0400291	0.347473	0.728236	0.890358
CHGB	21.5	22.333	20.667	-0.111893	0.37685	0.706285	0.880421
PEBP1	4056.33	4273.33	3839.33	-0.154506	2.69639	0.00700951	0.046746
BRAP	1126.67	1084	1169.33	0.109321	3.11363	0.00184803	0.0159078
ERP29	1505.5	1607.67	1403.33	-0.196111	1.5886	0.11215	0.330104
NOS1	7	6	8	0.415037	0.484833	0.627795	0.855491
FUS	1399.33	1265.67	1533	0.27646	3.03176	0.00243135	0.0198637
IGBP1	448.667	457.667	439.667	-0.0578871	0.714482	0.474929	0.754629
FXYD5	1269	1097.67	1440.33	0.391963	3.92058	8.83362e-05	0.00119389
ZNF302	260.667	278	243.333	-0.192151	0.679536	0.496798	0.769032
GRAMD1A	1813.17	1922	1704.33	-0.173401	1.2678	0.204868	0.466921
FXYD3	66.167	82	50.333	-0.70411	4.54888	5.39318e-06	0.000101753
HEPH	15.5	16.333	14.667	-0.155278	0.468874	0.63916	0.858974
CDIP1_ENSG00000089486	2283.5	2328.33	2238.67	-0.0566579	1.13567	0.256093	0.532834
CMTM1	13.333	10.667	16	0.584963	1.78885	0.0736383	0.263133
KCNH4	1	0.333	1.667	2.32193	1.63299	0.10247	0.313019
GANAB	6952.67	7091.67	6813.67	-0.0576934	0.499218	0.617626	0.847126
GMIP	1369.17	1284.33	1454	0.179008	2.18616	0.0288036	0.135545
RBM41	464	492.667	435.333	-0.178491	1.01378	0.310689	0.595537
BIRC5	1.667	2.333	1	-1.22239	1.26491	0.205903	0.467431
LAG3	1.333	1.667	1	-0.736966	0.632456	0.527089	0.793022
MLF2	8255.33	8174.33	8336.33	0.0283119	0.529014	0.596796	0.830367
OTUB2_ENSG00000089723	360.333	283	437.667	0.62903	6.58932	4.41839e-11	2.29333e-09
DDX24_ENSG00000089737	3739.67	4060.67	3418.67	-0.248283	1.61075	0.107235	0.322643
ZBTB25	143.333	158	128.667	-0.296286	2.93171	0.00337107	0.0260409
NECAP1	729	661.333	796.667	0.268599	3.42075	0.000624497	0.00642811
ARHGAP4	33.167	42.667	23.667	-0.850253	2.39321	0.0167018	0.0907439
ANKRD24	13.5	15.667	11.333	-0.467126	0.954782	0.339688	0.621368
DHX32	2122.83	2210.67	2035	-0.119453	4.66957	3.01828e-06	6.09227e-05
RCOR1	476.667	433	520.333	0.265069	4.6741	2.95242e-06	5.99204e-05
GPATCH2L	490.333	449.333	531.333	0.241831	4.39076	1.12953e-05	0.00019668
LTBP4	1547.17	1469.33	1625	0.145278	1.46303	0.143459	0.390548
BLVRB	2245.5	2525.33	1965.67	-0.361455	3.15324	0.00161471	0.0142205
SLC9A1	1894.17	1775.67	2012.67	0.180747	1.29911	0.193908	0.449383
SPTLC1	2898.33	2637	3159.67	0.260875	1.83091	0.0671143	0.245649
PAPOLA	3098.17	2962	3234.33	0.126897	1.25343	0.21005	0.472667
CCNK	92.333	93.667	91	-0.0416692	0.339887	0.733941	0.894733
PCBP4	894.5	764.333	1024.67	0.422881	4.2168	2.47796e-05	0.000391262
YPEL3	1081.67	1183.33	980	-0.272003	2.40035	0.0163793	0.0894299
MRPS33	424.5	382.333	466.667	0.287561	3.49084	0.000481505	0.00513388
NDUFB2	1603.67	1504.33	1703	0.178954	1.36673	0.17171	0.417189
NUDC	2766.67	2721.67	2811.67	0.0469352	0.424477	0.671218	0.858974
MAEA	2186.67	2086.33	2287	0.132487	3.15905	0.00158282	0.0140054
ICAM1	20816.3	16338.3	25294.3	0.630553	4.3247	1.5274e-05	0.000255737
STRN4	3231.33	3214.33	3248.33	0.0151801	0.19476	0.845581	0.958503
IRAK3	908.667	827	990.333	0.260027	1.79464	0.0727109	0.260812
LYZ	0.5	0.667	0.333	-1	0.57735	0.563703	0.801668
MUL1	2728.67	2752	2705.33	-0.0246741	0.466069	0.641166	0.858974
TFAP4	8	10.667	5.333	-1	2.3094	0.0209213	0.106997
PDCD7	294.833	325.333	264.333	-0.29956	3.76883	0.000164016	0.00204037
SPG21	2198.5	2335	2062	-0.179378	1.89614	0.0579417	0.223291
FETUB	0.5	0	1	Inf	1.73205	0.0832645	0.272284
DNAJB11	1041.83	932	1151.67	0.305321	3.54965	0.000385749	0.00425808
P3H2	666.833	693.333	640.333	-0.114726	0.452421	0.650966	0.858974
CHRD	0.333	0.667	0	#NAME?	1.41421	0.157299	0.392529
FLT3LG	0.833	0.667	1	0.584963	0.447214	0.654721	0.858974
RAB11FIP3_ENSG00000090565	766.5	779.333	753.667	-0.0483139	0.973105	0.330501	0.611357
GNPTG	1317.67	1389.33	1246	-0.157089	3.16366	0.00155798	0.0138358
ZNF268	358.833	318.333	399.333	0.327055	4.85771	1.1875e-06	2.67735e-05
GOLGA3	868.5	854	883	0.0481774	0.573851	0.566069	0.804266
PABPC4	441.5	433.333	449.667	0.0533787	0.687598	0.491706	0.767531
CERS4	54.167	71.667	36.667	-0.966833	3.7762	0.000159241	0.00199314
MCOLN1	993.5	1065	922	-0.208015	4.69442	2.67366e-06	5.45807e-05
USP48	868.333	886	850.667	-0.0587128	1.08043	0.279951	0.564269
EFNB1	4002.33	3693.33	4311.33	0.223211	2.42127	0.0154663	0.0854781
PDPR	223.333	245.667	201	-0.289507	1.36893	0.17102	0.416038
AARS1	2936	2826.33	3045.67	0.107826	0.963405	0.335344	0.615833
GLG1	9383.83	9589.33	9178.33	-0.0631983	0.897963	0.369205	0.653421
KIF4A	1.5	1.667	1.333	-0.321928	0.301511	0.763025	0.91261
TNRC6A_ENSG00000090905	183	181	185	0.0315356	0.235593	0.813748	0.940356
PLEKHG2	640	591.333	688.667	0.219834	1.8146	0.0695852	0.252834
DLL3	31.333	30.333	32.333	0.0921182	0.403604	0.686504	0.869296
NAT14	150.5	159.667	141.333	-0.175961	1.46695	0.142391	0.389463
PITPNM2	116.167	126.667	105.667	-0.261517	1.90061	0.0573531	0.222013
EXOC1	1100	1116.67	1083.33	-0.0437214	0.328073	0.742856	0.89999
RBM27	46.333	49.333	43.333	-0.187086	0.612465	0.54023	0.801668
POU4F3	2	3.333	0.667	-2.32193	0.915579	0.359888	0.643696
OSBPL8	1514.5	1444	1585	0.134412	1.13863	0.254858	0.531456
DTX2_ENSG00000091073	1760.67	1574	1947.33	0.307064	3.06334	0.00218878	0.0182299
NLRC4	6.167	7.667	4.667	-0.716207	0.803587	0.421635	0.704844
PUS7	333.333	317.667	349	0.135713	1.79649	0.0724171	0.259987
LAMB4	2.833	4	1.667	-1.26303	0.685888	0.492784	0.767531
NRCAM	1144.83	1243.67	1046	-0.249717	1.62945	0.103218	0.314791
LAMB1	5053.5	4898.33	5208.67	0.0886232	1.23271	0.217683	0.484258
SLC26A4	48.167	47.667	48.667	0.0299532	0.0865377	0.931039	1
DLD	2063.67	1948.67	2178.67	0.160958	2.15494	0.0311667	0.144053
WDR7	498.667	536.667	460.667	-0.220303	3.27617	0.00105224	0.00998806
TXNL1	1294.33	1190.33	1398.33	0.232343	2.73798	0.00618173	0.0422655
ABCC6_ENSG00000091262	32	34	30	-0.180572	0.586381	0.55762	0.801668
CMTM6	4082.5	3852.67	4312.33	0.162611	0.963409	0.335342	0.615833
ITGA6	7589.67	7804.33	7375	-0.0816323	0.987624	0.323337	0.602905
RAPGEF4	22.333	23.667	21	-0.172467	0.368529	0.712479	0.883229
MAP3K20	692.333	673.333	711.333	0.0792049	1.27593	0.20198	0.46257
SMPX	1.833	1	2.667	1.41504	1.06182	0.288319	0.57567
FH	808.167	810.333	806	-0.00773565	0.0911247	0.927393	1
SEL1L3	8858.67	9495.33	8222	-0.207729	5.06728	4.0355e-07	1.02335e-05
TF	434.667	584.667	284.667	-1.03834	4.03148	5.5427e-05	0.000795377
CDV3	2195.17	1852	2538.33	0.454797	6.69391	2.17284e-11	1.17531e-09
MYO15A	17.167	18.667	15.667	-0.252766	0.472241	0.636755	0.858974
ALKBH5	3718.33	3937.67	3499	-0.170398	1.99773	0.0457456	0.187494
APOH	0.333	0.333	0.333	0	0	1	1
NLRP1	1154.5	962	1347	0.485641	3.22525	0.00125862	0.0115734
PITPNM3	255.5	275.333	235.667	-0.224432	1.18353	0.2366	0.506126
SPAG7	1558.67	1555.67	1561.67	0.00555358	0.093417	0.925572	1
ORC6	75.333	68	82.667	0.281771	1.3418	0.179661	0.425474
ZFHX4	26.833	22.667	31	0.451696	1.1661	0.243574	0.516199
ZC3HC1	482.667	498.667	466.667	-0.0956833	1.48362	0.137911	0.380667
ESR1	5	6	4	-0.584963	1.09545	0.273322	0.555594
RGS17	40.667	50.667	30.667	-0.724366	2.90463	0.00367693	0.027961
ANGPT2	5.5	7.667	3.333	-1.20163	1.84305	0.0653218	0.240932
TMEM101	776.667	784.333	769	-0.0284833	0.285441	0.775306	0.920997
CD200	4.833	4.667	5	0.0995357	0.158114	0.874367	0.97621
CCDC80	3873.83	4526	3221.67	-0.490429	4.37986	1.18757e-05	0.000205759
CMA1	0.333	0.667	0	#NAME?	1.41421	0.157299	0.392529
PSME1_ENSG00000092010	4135.5	4388.67	3882.33	-0.176859	2.61406	0.00894738	0.05627
PPP2R3C	245.167	237.333	253	0.0922226	0.775674	0.437941	0.720985
HAUS4	66.333	68	64.667	-0.0725125	0.501255	0.616192	0.846287
SLC7A8	242.833	301.667	184	-0.71325	3.52081	0.000430236	0.0046638
OSGEP	455.5	402	509	0.34047	3.03816	0.0023803	0.0195316
SLC22A17	102.333	120.333	84.333	-0.512861	2.85122	0.0043552	0.0320564
RNF31_ENSG00000092098	2.167	2	2.333	0.222392	0.214407	0.83023	0.950019
SCFD1	1041.17	926	1156.33	0.320473	3.30385	0.000953666	0.00918101
G2E3	395.167	344.333	446	0.373238	2.8339	0.00459837	0.0335559
HECTD1	1801.17	1933.33	1669	-0.212106	2.74618	0.00602939	0.0415342
HNRNPC	9330.67	9418.33	9243	-0.0271106	0.539617	0.589461	0.825406
RPGRIP1	1.333	1	1.667	0.736966	0.632456	0.527089	0.793022
SUPT16H	1941	1991	1891	-0.0743439	2.77992	0.00543717	0.0382468
TOX4	1694.33	1599.67	1789	0.161382	5.08201	3.73469e-07	9.54615e-06
GEMIN2	144.5	128.667	160.333	0.317436	2.91104	0.00360223	0.0275216
TGM1_ENSG00000092295	955.167	743.667	1166.67	0.649664	2.2523	0.0243036	0.119558
TINF2_ENSG00000092330	2003	1794.33	2211.67	0.301686	6.20189	5.57892e-10	2.44187e-08
DAZL	0.5	0	1	Inf	1.73205	0.0832645	0.272284
TBL1Y	65	77.333	52.667	-0.5542	3.09585	0.0019625	0.0166754
SEMA6A	641.167	760.333	522	-0.542582	6.44415	1.16251e-10	5.70612e-09
TRPM7	565.167	589	541.333	-0.12175	1.51105	0.130777	0.36774
TYRO3	194	180.667	207.333	0.198622	1.00841	0.313258	0.595537
WDR76	17.5	21	14	-0.584963	2.04939	0.040424	0.173645
CAPN3	4.333	3	5.667	0.917538	0.777317	0.436972	0.720589
SNAP23	383.667	350.667	416.667	0.248793	2.65485	0.00793428	0.0514642
TBX15	1	1	1	0	0	1	1
PHGDH	528.333	274	782.667	1.51422	3.27773	0.00104645	0.00993704
COL9A3	1.333	1.333	1.333	0	0	1	1
EZR	19685.2	16566.7	22803.7	0.460982	5.12309	3.00575e-07	7.92707e-06
MYL6	36253.8	31655.3	40852.3	0.36797	3.67587	0.000237038	0.00281526
AGO1	651.5	689	614	-0.166265	1.99126	0.0464527	0.18985
TEKT2	1.667	1	2.333	1.22239	1.06294	0.28781	0.575313
CLSPN	4.833	1.667	8	2.26303	2.57015	0.0101656	0.0619973
RFFL	221.167	189.667	252.667	0.413769	5.03329	4.82124e-07	1.2063e-05
UNC13D	818.5	529	1108	1.06662	8.19799	2.44446e-16	2.44396e-14
MFSD11	480.5	518	443	-0.225645	1.95398	0.0507035	0.203031
DPYSL2	732.5	663.333	801.667	0.273268	2.94212	0.00325968	0.0253652
TGFB2	2501.67	2111	2892.33	0.454307	5.30089	1.15241e-07	3.27277e-06
GPATCH2	175.5	163.333	187.667	0.200353	1.73026	0.0835837	0.273108
NUP50	1234.5	1268.67	1200.33	-0.079878	1.3284	0.184046	0.433127
CDC45	7.833	5.333	10.333	0.954196	1.81542	0.0694597	0.252491
COMT	6084.83	6090.67	6079	-0.00276613	0.0415424	0.966863	1
ADA2	17.167	19.333	15	-0.366128	0.760158	0.44716	0.729076
VNN3	199.333	87	311.667	1.84092	13.2897	2.6579e-40	1.1789e-37
ECHDC1	1079.17	1142.33	1016	-0.169083	1.7231	0.0848698	0.276311
LRRFIP2	1569	1382	1756	0.345535	4.81671	1.45942e-06	3.21322e-05
SEC22C	940.833	955	926.667	-0.0434503	0.764202	0.444747	0.726893
XYLB	49.333	48.667	50	0.0389941	0.13939	0.889142	0.984152
HDAC6	1460.33	1504.67	1416	-0.0876227	1.56025	0.118702	0.342933
GABRP	2560.67	2485.67	2635.67	0.0845351	0.328397	0.742611	0.899812
KRT31_ENSG00000094796	47.167	34.667	59.667	0.783376	2.41948	0.0155429	0.085843
CDC6	15	14.333	15.667	0.128324	0.384382	0.700696	0.879746
UPRT	550.5	505.333	595.667	0.23727	2.91934	0.00350774	0.0269346
CDC23	1336.17	1336	1336.33	0.000359909	0.00741383	0.994085	1
AAAS	782.333	788.333	776.333	-0.0221295	0.221546	0.824667	0.948166
CBX5	1268.67	1280.33	1257	-0.0265348	0.207038	0.83598	0.95387
FMO2	830.167	1203.67	456.667	-1.39822	5.51594	3.46922e-08	1.11611e-06
SUCO	914.833	812.333	1017.33	0.324649	2.85111	0.0043567	0.0320564
MSH2	324.167	293	355.333	0.278272	2.26055	0.0237869	0.117564
MAP3K1	586.167	615.667	556.667	-0.145336	1.21349	0.224944	0.493288
DHPS	11	7.667	14.333	0.902703	1.59053	0.111715	0.329142
HOOK2	719.333	707	731.667	0.0494763	0.663667	0.506903	0.777485
ARCN1	6010.83	5710	6311.67	0.14453	4.41758	9.98103e-06	0.00017593
EPB41L4B	1637.67	1313.67	1961.67	0.578481	8.28826	1.14915e-16	1.19236e-14
TMEM38B	296	358.333	233.667	-0.61685	2.95764	0.0031	0.0243557
PSMD5	1549.33	1499.67	1599	0.0925281	1.23125	0.218228	0.485288
PTGS1	50.167	79.333	21	-1.91754	5.24366	1.57419e-07	4.33435e-06
NUP188	2293	2284.33	2301.67	0.0109057	0.125626	0.900028	0.990802
CRAT	1583.5	1831.67	1335.33	-0.455957	4.5734	4.79877e-06	9.18885e-05
SH2D3C	4.5	5.667	3.333	-0.765535	1.02416	0.30576	0.595537
NANS	864.167	873.667	854.667	-0.0317211	0.399346	0.689638	0.871334
TBC1D2	5094.67	6330.67	3858.67	-0.714255	5.35591	8.51287e-08	2.48708e-06
WHRN	119.167	148	90.333	-0.712267	6.07485	1.24102e-09	5.14277e-08
CWF19L1	315.833	276.333	355.333	0.362763	3.38238	0.00071861	0.00722516
SEMA4G	15.333	13	17.667	0.442518	1.43679	0.150778	0.392529
BTAF1	529.833	509	550.667	0.113514	2.08914	0.0366947	0.161204
IKZF5	342.167	364	320.333	-0.184365	1.6871	0.0915851	0.291864
BLNK	140.333	160.667	120	-0.421036	1.5865	0.112626	0.331265
TLL2	163	217	109	-0.993367	6.27665	3.45954e-10	1.57161e-08
CYP26A1	2.5	2.333	2.667	0.192645	0.258199	0.796253	0.930164
TDRD1	0.5	0.667	0.333	-1	0.57735	0.563703	0.801668
SORBS1	27.333	37	17.667	-1.0665	2.88455	0.00391979	0.0293413
CRTAC1	52.333	64	40.667	-0.654225	2.6718	0.00754456	0.0494624
BAMBI	155.667	151.333	160	0.0803421	0.399616	0.689439	0.871199
IL11	39.333	20	58.667	1.55254	3.46186	0.000536463	0.00562883
MYO3A	0.5	0	1	Inf	1.73205	0.0832645	0.272284
WAC	1670.67	1680	1661.33	-0.0161197	0.47816	0.632536	0.858974
CREM	279	242	316	0.384918	3.06718	0.0021609	0.0180222
NUBP2	2122.67	2170.33	2075	-0.0648053	0.828108	0.40761	0.69355
SMIM24	31.5	31.333	31.667	0.0152668	0.0662266	0.947197	1
HIVEP1	246	234.667	257.333	0.133025	1.25639	0.208974	0.470766
TREM2	214.5	305.667	123.333	-1.3094	8.58896	8.77617e-18	1.01467e-15
FKBP5	2039.5	2602.67	1476.33	-0.817972	5.38731	7.15193e-08	2.14602e-06
SRPK1	1464	1391.33	1536.67	0.143336	2.85027	0.00436816	0.0321258
BRPF3	531.833	558.667	505	-0.145704	2.44592	0.0144484	0.0809342
MRPS18A	520.833	513.333	528.333	0.0415525	0.614316	0.539007	0.801668
PGC	0.333	0.667	0	#NAME?	1.41421	0.157299	0.392529
TMEM14A	665.667	746.333	585	-0.351383	2.14822	0.0316967	0.145961
EFHC1	168.333	178	158.667	-0.165878	1.14817	0.250898	0.526508
HSP90AB1	17894	17458.3	18329.7	0.0702647	0.950905	0.341653	0.623568
CDC5L	1250.17	1202.67	1297.67	0.109683	1.71851	0.0857045	0.278027
ITPR3	4742.5	5031.33	4453.67	-0.175947	0.75239	0.451816	0.733875
ZNF184	197.167	191.333	203	0.0853915	0.992746	0.320834	0.599704
DSP	17617.5	18392.3	16842.7	-0.126984	1.38982	0.164582	0.405381
SIRT1	214	222.667	205.333	-0.116918	0.699813	0.484044	0.760009
HNRNPH3	1332.83	1293.33	1372.33	0.0855368	1.02726	0.3043	0.595537
IFT74	163.5	152	175	0.203284	0.835488	0.403443	0.690113
JAK2	433.833	454.667	413	-0.138667	1.57158	0.116047	0.338205
IL12RB1	20.167	21.667	18.667	-0.215013	0.811484	0.417088	0.700892
ABL1	2693	2710	2676	-0.0182147	0.135861	0.891931	0.985793
ACOT7	2499	2246.33	2751.67	0.292734	7.93359	2.12894e-15	1.92353e-13
SH3GLB1	2986.5	2834.33	3138.67	0.147142	3.49372	0.000476347	0.00509223
CDC7	67.5	74.333	60.667	-0.293105	0.869682	0.384474	0.669061
SYDE2	88.333	105.667	71	-0.573629	2.44194	0.0146084	0.0815498
PCSK5	480	576.333	383.667	-0.58705	3.62664	0.000287136	0.00331034
SCD	5528.5	6252.33	4804.67	-0.379958	1.81128	0.0700972	0.254168
TMED1	527.833	549	506.667	-0.115769	1.0934	0.274218	0.556791
ABLIM1	2353.83	2691.67	2016	-0.417004	4.69836	2.62258e-06	5.37629e-05
ERMP1	4661.67	5352	3971.33	-0.430455	3.7348	0.000187867	0.00229037
RAB18	4816.17	4427.33	5205	0.23346	1.25512	0.209434	0.471671
NRP1	1288	1263.67	1312.33	0.0545183	0.802409	0.422317	0.705596
HSD17B7P2_ENSG00000099251	17.333	17	17.667	0.0554951	0.155888	0.876122	0.977195
PRTFDC1	103	101.333	104.667	0.0466932	0.160246	0.872687	0.975527
PALMD	340.333	411	269.667	-0.607961	4.79792	1.60323e-06	3.47036e-05
TSPAN15	973.833	913	1034.67	0.180479	2.04043	0.0413074	0.176439
MACROH2A2	989.5	971.667	1007.33	0.0520078	0.752772	0.451587	0.733551
WASHC2A	537.333	556.333	518.333	-0.102069	1.71649	0.0860733	0.278904
MAST3	311.667	329.667	293.667	-0.166829	1.83272	0.0668447	0.244993
MZF1	348	377.333	318.667	-0.243791	3.58885	0.000332142	0.00374081
OCEL1	313.5	368.667	258.333	-0.513083	6.78598	1.15299e-11	6.48092e-10
MYO9B	985.333	1011.33	959.333	-0.0761545	0.445172	0.656195	0.858974
KCNK6	1808.67	1649.33	1968	0.254847	2.94163	0.00326485	0.0253973
CATSPERG	11.5	9.333	13.667	0.550197	0.992879	0.320769	0.599629
PSMD8	4720	4555.67	4884.33	0.100499	1.54882	0.121425	0.348204
FBXL19	21.833	19.333	24.333	0.331844	1.25365	0.209971	0.472575
STX1B	2.667	1.333	4	1.58496	2	0.0455003	0.186677
HSD3B7	81.167	93.333	69	-0.435796	2.86379	0.004186	0.0310105
SETD1A	29.667	32.667	26.667	-0.292782	1.1416	0.25362	0.529759
BCL7C	537.333	469.667	605	0.365298	4.31533	1.59364e-05	0.000265371
EFNA2	1.667	0.667	2.667	2	1.6917	0.0907039	0.28951
CIRBP	1038.17	935.667	1140.67	0.285811	2.93425	0.0033436	0.0258615
ATP5F1D	1409	1351.67	1466.33	0.117474	0.97393	0.330091	0.61097
CBARP	141.833	122	161.667	0.406141	1.67562	0.0938121	0.296828
PRKY	155	166.667	143.333	-0.217591	1.17719	0.239121	0.509791
IGFALS	0.5	0.333	0.667	1	0.57735	0.563703	0.801668
HNRNPM	3916.67	3560.67	4272.67	0.262989	3.20212	0.0013642	0.0123524
MARCHF2	861.167	859	863.333	0.00725956	0.0847888	0.932429	1
NDUFB7	2121.83	2028.67	2215	0.126775	1.10673	0.268409	0.548352
TECR	3511.83	3875.67	3148	-0.300009	7.36161	1.81705e-13	1.31145e-11
TIMM13	1769	1755.67	1782.33	0.0217482	0.187409	0.85134	0.961948
CDC34	3285.83	3139	3432.67	0.129025	1.29627	0.194884	0.450889
MTAP	621.833	590	653.667	0.14784	2.84744	0.00440718	0.0323445
MISP	5038.17	3790.67	6285.67	0.729614	6.39897	1.56429e-10	7.52679e-09
CEP170B	643.333	579.333	707.333	0.287997	3.1571	0.00159344	0.0140723
POLR2E	4920.17	5010.67	4829.67	-0.0530789	0.671413	0.501958	0.772328
POLRMT	1594.17	1708	1480.33	-0.206386	1.7256	0.0844188	0.275235
HCN2	2.333	1.333	3.333	1.32193	1.12132	0.262153	0.540228
IZUMO4	30	14.667	45.333	1.62803	6.73291	1.66299e-11	9.17842e-10
RASSF7_ENSG00000099849	2946.17	2852.67	3039.67	0.0916019	1.02617	0.304812	0.595537
GADD45B	2011	2176.67	1845.33	-0.238239	1.15488	0.248138	0.522312
PALM	150.5	149.333	151.667	0.0223678	0.127268	0.898729	0.989953
MADCAM1	4.333	5.333	3.333	-0.678072	1.11417	0.265205	0.544403
MKNK2	4910.5	4490	5331	0.247691	3.80876	0.000139666	0.00177549
ARVCF	552.667	446	659.333	0.563964	3.226	0.00125532	0.0115473
TRMT2A	892.333	915.333	869.333	-0.0743878	0.713913	0.475281	0.7548
RANBP1	1179.17	1143	1215.33	0.0885267	1.7804	0.0750104	0.266824
ZDHHC8	810.833	783.667	838	0.0967101	0.95212	0.341036	0.623049
KLHL22	488.833	449.333	528.333	0.233662	3.15476	0.00160632	0.0141569
MED15	4209.83	3910.67	4509	0.205393	2.22245	0.0262532	0.126171
SERPIND1	6.333	3	9.667	1.68806	2.7074	0.0067812	0.045472
SNAP29	977.833	987	968.667	-0.0270498	0.609122	0.542444	0.801668
CRKL	3178.83	3227.67	3130	-0.0443289	0.545989	0.585073	0.821129
LZTR1	468.667	445	492.333	0.14583	1.2015	0.229556	0.497897
MMP11_ENSG00000099953	53.833	46	61.667	0.422857	2.61515	0.00891883	0.0561773
SMARCB1_ENSG00000099956	1562.83	1503.33	1622.33	0.109905	2.05271	0.0401007	0.172684
P2RX6	7.833	10.667	5	-1.09311	1.65849	0.0972184	0.30394
DERL3_ENSG00000099958	1.333	1	1.667	0.736966	0.50605	0.612821	0.843381
SLC7A4	107.5	128.333	86.667	-0.566347	4.32689	1.51231e-05	0.000253732
BCL2L13	1446.17	1480	1412.33	-0.0675165	2.04179	0.0411724	0.176071
DDTL_ENSG00000099974	11	12.667	9.333	-0.440573	0.916949	0.359169	0.642936
GSTT2_ENSG00000099984	0.333	0.333	0.333	0	0	1	1
CABIN1_ENSG00000099991	299.333	294.667	304	0.0449875	0.57686	0.564034	0.801936
TBC1D10A	648.333	610.333	686.333	0.169312	3.39066	0.000697251	0.00704616
SUSD2	162.5	127.333	197.667	0.634459	1.26778	0.204875	0.466921
SF3A1	1355	1398	1312	-0.0915966	0.916814	0.35924	0.643016
GGT5	102.667	137.667	67.667	-1.02466	3.37008	0.000751476	0.00749786
RNF215	80.667	74.667	86.667	0.215013	1.27084	0.203787	0.465529
SEC14L2	3605.33	3402.33	3808.33	0.162635	1.68561	0.091871	0.292399
SPECC1L	261.333	234.667	288	0.295456	2.48248	0.013047	0.0751907
PPIL2	971.833	962.667	981	0.0272168	0.324895	0.745261	0.901517
UPB1	3.167	5.333	1	-2.41504	2.51966	0.0117469	0.069403
YPEL1	19.667	21.667	17.667	-0.294447	0.702331	0.482473	0.758567
SNRPD3	302.667	286.667	318.667	0.152674	1.86565	0.0620907	0.231818
PES1	1630.17	1659	1601.33	-0.0510402	0.46544	0.641616	0.858974
MAPK1	4306.5	4088	4525	0.146523	7.70338	1.32512e-14	1.11087e-12
GGT1_ENSG00000100031	28.333	26	30.667	0.23816	0.613865	0.539305	0.801668
PRODH	3.667	4.333	3	-0.530515	0.852803	0.393769	0.678293
PPM1F	499.5	509	490	-0.0548839	0.492686	0.622234	0.850768
SLC35E4	251.167	247	255.333	0.0478708	0.336684	0.736355	0.8966
TOP3B	5.333	5.667	5	-0.180572	0.211963	0.832136	0.951397
CRYBB3	0.667	0.333	1	1.58496	1	0.317311	0.595537
CYTH4	9.167	11.667	6.667	-0.807355	1.30231	0.192811	0.447367
ESS2	629	582.667	675.333	0.212929	2.89391	0.00380475	0.0287359
CRYBB2P1	552.167	510.667	593.667	0.217271	2.41567	0.0157063	0.0865694
MFNG	6	5	7	0.485427	0.914177	0.360624	0.644736
[truncated: 22,396 more rows]

## Sheet: BALF_HCvsS
geneID	pval	fdr	meanExp	logR	expT	rsZ	auc
RPL13A	0	0	4.70275	0.835929	0.981499	52.0331	0.939077
RPS20	0	0	3.32971	1.2695	0.929791	48.2792	0.905755
RPL27A	0	0	3.6275	0.959773	0.940228	46.1686	0.888888
TMEM190	0	0	4.12473	2.34828	0.879507	48.5498	0.888784
CRIP1	0	0	3.2506	1.69329	0.930266	46.3816	0.886438
MS4A8	0	0	2.8281	1.80799	0.921727	46.4744	0.882188
AGR3	0	0	3.56433	1.51976	0.931689	45.1219	0.876355
GSTA1	0	0	3.90421	1.49238	0.950664	44.7589	0.872269
FXYD3	0	0	3.77741	0.851431	0.959677	43.5645	0.866797
TPPP3	0	0	4.00682	1.52938	0.924099	43.5523	0.861401
RPL7	0	0	3.54992	0.786859	0.936907	41.2951	0.847868
CALM2	0	0	4.27226	0.736684	0.976281	41.2304	0.847866
CETN2	0	0	2.9647	1.89077	0.854364	42.3967	0.845582
RPL21	0	0	4.0809	0.569733	0.954934	40.8986	0.845061
RPS11	0	0	3.45465	0.654473	0.94592	40.8377	0.844343
PRDX5	0	0	4.80738	0.810329	0.983397	39.3615	0.832094
TMEM59	0	0	3.07175	0.835865	0.926471	39.3676	0.831272
C9orf24	0	0	3.65982	1.4847	0.87334	40.2997	0.829682
CAPS	0	0	4.31385	1.19049	0.971063	38.8837	0.826109
CES1	0	0	2.49688	1.78444	0.846774	40.3337	0.826037
TUBA1A	0	0	3.4949	1.54602	0.890417	39.3295	0.824148
C2orf40	0	0	2.72978	2.07218	0.779886	41.0508	0.820379
CAPSL	0	0	2.54995	2.00872	0.777989	40.782	0.820366
TSPAN19	0	0	2.28912	2.09553	0.774668	41.1933	0.820016
XIST	0	0	1.60411	2.04471	0.769924	40.4049	0.817252
TSTD1	0	3.72361e-306	2.70095	1.12383	0.902277	37.5539	0.81465
MT-ND2	1.24802e-288	3.15789e-286	6.28315	0.408208	0.965844	36.3071	0.806452
TUBB4B	4.57085e-287	1.104e-284	4.42219	0.901701	0.969639	36.2079	0.805294
RPS10	1.50422e-297	3.99647e-295	2.0214	1.38176	0.80408	36.868	0.803991
NDUFC2	0	0	1.57607	1.79565	0.76186	37.7639	0.803376
PIFO	6.50364e-308	1.9199e-305	2.80122	1.5619	0.808824	37.5093	0.801633
NDUFB8	0	0	1.37987	2.28362	0.704459	39.2865	0.800671
DYNLL1	3.71461e-272	7.40183e-270	4.233	0.744254	0.964421	35.2477	0.797286
UBB	1.07063e-271	2.10703e-269	3.87644	0.610559	0.958254	35.2177	0.797117
HMGN3	1.17313e-273	2.39756e-271	2.97859	0.98708	0.917932	35.3456	0.796557
C1orf194	1.16971e-289	3.00748e-287	3.29546	1.41116	0.832543	36.3722	0.794936
C20orf85	4.28652e-283	9.62414e-281	3.59804	1.3316	0.857685	35.9546	0.793022
ATP5IF1	3.26081e-260	5.84051e-258	3.54359	0.882584	0.946395	34.4594	0.790268
IGFBP5	0	0	1.60779	2.08404	0.705408	37.876	0.786684
MORN5	2.03739e-302	5.79965e-300	2.05949	1.93071	0.721063	37.1706	0.786073
C11orf88	6.16844e-288	1.51279e-285	2.3714	1.69442	0.758065	36.2631	0.785912
TSPAN1	1.39391e-245	2.09626e-243	4.03227	0.651523	0.969165	33.4683	0.782035
RPL31	3.64518e-242	5.33099e-240	3.29831	0.568259	0.933586	33.2326	0.780079
WDR54	9.10193e-278	1.98759e-275	1.97089	1.75801	0.729602	35.6121	0.778912
PSENEN	2.8416e-245	4.23345e-243	2.5888	1.2319	0.858159	33.447	0.77777
FAM92B	9.11384e-277	1.96329e-274	2.07688	1.68397	0.74241	35.5474	0.777428
FAM183A	1.25753e-252	2.04553e-250	3.1335	1.29434	0.833966	33.9491	0.77633
SMIM22	2.63891e-232	3.50557e-230	2.88403	0.870302	0.917457	32.5429	0.773353
RPS17	8.18528e-235	1.11523e-232	2.11977	1.03835	0.818786	32.7197	0.772318
DEGS2	1.06679e-260	1.93246e-258	1.55678	1.74071	0.72296	34.4917	0.772268
MORN2	3.63653e-236	5.08508e-234	2.69335	1.30076	0.818786	32.8147	0.768477
IFT27	9.72338e-247	1.47619e-244	1.69082	1.60431	0.748577	33.5477	0.768237
DNAH5	4.0813e-253	6.77708e-251	1.92878	1.67008	0.731499	33.9822	0.76567
ERICH3	5.24905e-269	1.02043e-266	1.70172	1.84068	0.688805	35.0415	0.76523
IGFBP7	6.32991e-240	9.09055e-238	2.62853	1.42377	0.783681	33.0772	0.76504
HLA-DRA	5.88994e-213	5.76022e-211	2.90364	0.88726	0.904175	31.1452	0.761212
H3F3A	5.42762e-210	5.21215e-208	3.85033	0.422627	0.954934	30.9255	0.760902
LRRIQ1	4.46894e-232	5.8393e-230	2.2917	1.37935	0.78463	32.5267	0.760786
CKB	6.94377e-214	6.96167e-212	2.67665	1.064	0.843454	31.2137	0.75996
C9orf116	1.0363e-227	1.30076e-225	2.56246	1.31357	0.780835	32.2165	0.759724
FABP6	2.02607e-284	4.61394e-282	1.60767	2.25099	0.622391	36.0393	0.759511
NME5	6.54913e-252	1.044e-249	1.6493	1.79735	0.682163	33.9005	0.759355
SNTN	1.45046e-237	2.04617e-235	2.29875	1.46865	0.756641	32.9126	0.759159
RSPH1	7.88073e-220	9.03789e-218	2.93407	1.18527	0.826376	31.6488	0.758458
DNAAF1	1.357e-229	1.73055e-227	2.43068	1.38892	0.775617	32.3507	0.758139
OMG	8.75557e-254	1.50078e-251	1.95127	1.7861	0.685484	34.0274	0.755664
METRN	7.72848e-261	1.41609e-258	1.30672	2.17578	0.625237	34.5011	0.755234
EFHC1	2.05142e-221	2.44043e-219	2.22841	1.34418	0.787476	31.7637	0.7551
UFC1	2.99038e-203	2.65864e-201	2.60938	0.917566	0.875712	30.42	0.754983
FAM166B	6.65788e-248	1.02051e-245	1.59502	1.75368	0.67315	33.6275	0.753465
C22orf15	1.2229e-252	2.00971e-250	1.5216	1.86247	0.6537	33.9499	0.753144
ABCA5	6.89179e-242	9.98746e-240	1.24914	1.88172	0.660816	33.2134	0.753027
EPHX1	1.36942e-207	1.25459e-205	1.9225	1.12592	0.816888	30.7463	0.752961
MRPS31	7.97203e-217	8.88686e-215	2.13008	1.4378	0.751423	31.4296	0.752689
CD59	2.1385e-198	1.7942e-196	2.74605	0.832796	0.899431	30.0507	0.752386
SARAF	2.26951e-198	1.89415e-196	2.41814	0.779151	0.88093	30.0487	0.752025
ATP5PO	1.26874e-215	1.37585e-213	1.39403	1.4398	0.712998	31.3415	0.750924
RPL23	8.68407e-196	7.06289e-194	2.38594	0.686713	0.866224	29.8504	0.750549
B9D1	2.75659e-234	3.69267e-232	1.49809	1.76004	0.666509	32.6826	0.749885
CCDC78	1.09541e-214	1.13389e-212	2.27298	1.33901	0.766129	31.2728	0.74827
TMBIM4	3.11145e-213	3.08072e-211	1.31157	1.49751	0.696395	31.1657	0.748041
DNPH1	3.77218e-199	3.19853e-197	1.939	1.16706	0.798861	30.1083	0.747656
CCDC153	3.13933e-239	4.46823e-237	1.41348	1.8336	0.64611	33.0288	0.747424
DPCD	1.94889e-220	2.25125e-218	1.61996	1.60851	0.690702	31.6929	0.746784
C11orf97	1.71152e-235	2.35201e-233	1.61198	1.75558	0.655123	32.7675	0.746541
TCTEX1D4	5.35169e-236	7.41838e-234	1.50563	1.76283	0.6537	32.8029	0.745414
SLC27A2	5.03846e-221	5.90574e-219	1.25546	1.69651	0.667457	31.7355	0.745056
TCTEX1D2	8.5729e-216	9.36032e-214	1.73227	1.5837	0.68833	31.354	0.744876
HSP90AA1	1.61586e-182	1.1713e-180	4.89392	0.469827	0.983397	28.8098	0.743145
RPA3	4.51611e-201	3.8705e-199	1.62172	1.4305	0.726755	30.2548	0.742803
GABPB1-AS1	3.70713e-225	4.5111e-223	1.31413	1.80194	0.64611	32.0337	0.741781
PFDN5	4.42998e-180	3.11094e-178	3.08363	0.509312	0.931214	28.6145	0.741212
TOMM7	5.79156e-180	4.04927e-178	2.58299	0.612504	0.893738	28.6052	0.740589
DYNC2H1	2.64719e-225	3.24607e-223	1.39277	1.81648	0.63425	32.0442	0.739876
RSPH9	1.26682e-212	1.23137e-210	1.70891	1.5212	0.686907	31.1206	0.739705
CCDC17	7.44956e-203	6.45399e-201	1.95091	1.36141	0.744307	30.39	0.739139
SCGB1A1	4.76329e-179	3.31579e-177	6.64092	0.957097	0.981499	28.5315	0.739046
TEKT1	8.75338e-208	8.06576e-206	1.76449	1.45247	0.700664	30.7609	0.738919
AC013264.1	1.02469e-214	1.07465e-212	1.67184	1.60049	0.666983	31.2749	0.738048
FAM229B	1.13875e-197	9.45463e-196	1.84197	1.38794	0.722486	29.995	0.736901
LDHB	1.30945e-176	8.80755e-175	2.09599	0.89835	0.829696	28.3342	0.735847
C5orf49	1.05801e-191	8.18726e-190	2.13373	1.25078	0.750474	29.5339	0.735512
PRR29	6.17476e-206	5.52987e-204	1.55856	1.51081	0.680266	30.6223	0.735345
CIB1	4.67726e-169	2.84581e-167	2.99993	0.642642	0.921727	27.7144	0.733415
NEK5	3.74865e-213	3.68871e-211	1.42067	1.69657	0.635199	31.1597	0.733356
AC013470.2	5.9965e-256	1.05044e-253	1.04633	2.31291	0.54222	34.1735	0.733242
C12orf75	1.99864e-193	1.58509e-191	1.80371	1.45832	0.684535	29.6678	0.73208
KCTD12	3.07966e-215	3.29483e-213	1.32123	1.83967	0.610531	31.3133	0.731579
DYDC2	5.03329e-215	5.34905e-213	1.34509	1.7536	0.614326	31.2976	0.730808
AKAP14	3.32976e-223	3.99096e-221	1.29541	1.84935	0.5963	31.8931	0.730775
GSTA2	2.16502e-208	2.04217e-206	1.74683	1.88149	0.62334	30.8062	0.730376
PROM1	3.46199e-212	3.3447e-210	1.24575	1.71255	0.620968	31.0883	0.729736
DYNLRB2	4.63195e-181	3.29634e-179	2.22069	1.22461	0.750949	28.6932	0.728717
CFAP126	1.2245e-192	9.61565e-191	1.76577	1.44505	0.671252	29.6067	0.72867
SRI	3.98655e-163	2.26963e-161	2.49344	0.733954	0.88093	27.2179	0.728468
CCDC33	6.81515e-202	5.87245e-200	1.33464	1.52496	0.65038	30.3171	0.728263
IGFBP2	1.86048e-165	1.10252e-163	2.49956	0.851526	0.828748	27.4141	0.728093
DRC3	4.5025e-185	3.36969e-183	1.77835	1.33129	0.710152	29.0131	0.727071
PSMA2	3.27693e-207	2.96805e-205	0.952116	1.8404	0.585863	30.718	0.725955
SPAG8	1.96124e-207	1.78652e-205	1.23057	1.7066	0.605787	30.7346	0.725231
EPPIN	3.44037e-232	4.53248e-230	1.17142	2.13737	0.546015	32.5348	0.72521
NUDC	3.16106e-159	1.69096e-157	2.35491	0.875009	0.847249	26.8865	0.724549
SPAG16	3.34164e-176	2.22883e-174	1.4478	1.42969	0.677894	28.3012	0.723219
CD164L2	3.35302e-203	2.93684e-201	1.2336	1.73105	0.601518	30.4162	0.72319
TFF3	9.08071e-157	4.65452e-155	3.38526	0.932989	0.880455	26.6754	0.722496
SLC44A4	1.45598e-155	7.34486e-154	2.27189	0.785021	0.868596	26.5713	0.722337
CLUAP1	1.15013e-180	8.11246e-179	1.32279	1.53916	0.639469	28.6616	0.720094
DPY30	3.82262e-159	2.038e-157	1.66439	1.12762	0.750949	26.8794	0.719438
CCDC170	1.59498e-171	1.00895e-169	1.85356	1.26959	0.70351	27.9184	0.719378
LDLRAD1	7.93199e-183	5.80018e-181	1.54358	1.41453	0.662239	28.8345	0.719023
RPS6	7.54421e-148	3.47579e-146	4.05757	0.347251	0.958729	25.8952	0.718514
CDHR3	1.49478e-176	1.00119e-174	1.66745	1.3186	0.693074	28.3296	0.718508
SPA17	1.06158e-178	7.32585e-177	1.44	1.48376	0.643264	28.5035	0.718092
CD63	1.89013e-147	8.65822e-146	2.92511	0.506661	0.897533	25.8598	0.717707
RPL9	1.17229e-146	5.27897e-145	3.52138	0.353696	0.944023	25.7892	0.717549
ODF3B	7.43049e-149	3.46344e-147	2.57505	0.908796	0.824478	25.9844	0.716501
METTL7A	1.08225e-164	6.2508e-163	1.38478	1.335	0.676945	27.3499	0.715814
CDS1	5.67651e-157	2.91901e-155	1.61757	1.17734	0.723909	26.693	0.715501
SKP1	7.39041e-144	3.22768e-142	2.72931	0.522212	0.907021	25.5384	0.715079
NDUFA4	3.04113e-143	1.32094e-141	2.75305	0.495973	0.90038	25.483	0.714465
CDHR4	2.57639e-178	1.77027e-176	1.38196	1.4447	0.636622	28.4724	0.714314
SPAG6	1.80484e-174	1.16955e-172	1.44092	1.41348	0.641366	28.1601	0.713789
HSPB11	1.38834e-148	6.45233e-147	1.86506	1.04256	0.768501	25.9604	0.713547
NDUFA13	7.16147e-145	3.15362e-143	1.77106	0.828395	0.802182	25.6295	0.713198
MGST3	3.89155e-148	1.80335e-146	1.61807	0.998065	0.766603	25.9207	0.712895
CHMP2A	2.06943e-144	9.08783e-143	1.69837	0.84405	0.783681	25.5881	0.712223
ARL3	4.21226e-159	2.23825e-157	1.35122	1.35205	0.662713	26.8758	0.711604
NDUFA11	3.84113e-150	1.80624e-148	1.32441	1.10423	0.696395	26.098	0.710354
FXYD1	1.27253e-228	1.60995e-226	0.933854	2.35999	0.481499	32.2815	0.709794
IK	5.56492e-141	2.32226e-139	2.13535	0.946031	0.79649	25.2781	0.709541
ALDH1A1	4.54008e-138	1.83224e-136	2.86919	0.752359	0.910342	25.0119	0.709229
NDUFB7	1.35893e-138	5.51213e-137	1.87758	0.693735	0.813567	25.06	0.709104
SSBP4	1.13504e-152	5.53322e-151	1.41419	1.26193	0.677894	26.3199	0.708915
MAPK15	1.28199e-162	7.22125e-161	1.42267	1.31788	0.653226	27.175	0.708281
ODF2L	1.92037e-141	8.05597e-140	1.69151	0.956444	0.782732	25.3201	0.708175
CFAP53	2.22947e-157	1.15766e-155	1.72078	1.26062	0.671727	26.7279	0.707926
PROS1	6.96455e-221	8.10378e-219	0.993713	2.39005	0.479602	31.7253	0.707319
DNAAF4	7.06462e-171	4.41636e-169	1.22741	1.52318	0.596774	27.8651	0.707092
CENPM	6.21872e-187	4.67607e-185	1.05343	1.84208	0.537951	29.1601	0.706015
ZMYND10	1.32624e-145	5.93866e-144	2.131	1.0289	0.75759	25.6951	0.705936
ANKRD66	1.99754e-196	1.63373e-194	1.00437	1.86839	0.521822	29.8995	0.705515
ERGIC3	3.58526e-132	1.36078e-130	2.14515	0.694226	0.847249	24.4638	0.704737
CLU	5.65019e-130	2.09465e-128	3.09812	0.566831	0.930266	24.2565	0.704169
CFAP52	7.24589e-170	4.477e-168	1.17455	1.51824	0.582068	27.7816	0.70369
CFAP300	6.9239e-159	3.66691e-157	1.42366	1.40545	0.614326	26.8573	0.703067
FAM216B	2.17169e-167	1.30146e-165	1.29617	1.4263	0.59962	27.5758	0.70248
DCDC2B	3.67978e-193	2.90393e-191	0.953353	1.83108	0.513757	29.6473	0.702107
COPRS	2.85391e-145	1.27079e-143	1.34107	1.30245	0.648482	25.6653	0.701808
TUSC3	9.79642e-142	4.16439e-140	1.39928	1.19142	0.681689	25.3466	0.701461
TMEM67	5.50323e-175	3.61016e-173	1.01074	1.69341	0.545541	28.2021	0.701414
CHST9	2.01765e-133	7.76894e-132	1.67236	0.90894	0.77277	24.581	0.701112
PDLIM4	4.09283e-133	1.57214e-131	1.61613	0.980475	0.741461	24.5522	0.700677
AC244090.1	1.32014e-152	6.41596e-151	1.22644	1.39047	0.610531	26.3142	0.699067
RIIAD1	2.41862e-169	1.4829e-167	1.11403	1.57716	0.552657	27.7382	0.698327
RPS3A	3.51276e-121	1.18637e-119	3.58097	0.353131	0.933112	23.4084	0.697437
WRB	5.30748e-152	2.54074e-150	1.11448	1.45945	0.590607	26.2613	0.697231
CATSPERD	3.68038e-169	2.24785e-167	1.07054	1.58775	0.538899	27.7231	0.695545
MNS1	2.35047e-150	1.10855e-148	1.25508	1.35543	0.600569	26.1168	0.695477
GTF2H5	9.60414e-130	3.54397e-128	1.27457	1.09138	0.682163	24.2346	0.694926
ENDOG	6.70452e-145	2.96058e-143	1.18302	1.39363	0.601044	25.632	0.694898
CLIC6	5.22451e-133	2.00202e-131	1.2105	1.19992	0.654649	24.5423	0.694706
IFT43	5.71188e-131	2.12741e-129	1.45421	1.14009	0.678368	24.3506	0.694488
C21orf58	9.02961e-154	4.48414e-152	1.15642	1.40315	0.579222	26.4158	0.694277
CYP4B1	3.73552e-120	1.25101e-118	2.29091	0.73185	0.837761	23.3073	0.694062
ROPN1L	2.65689e-139	1.08044e-137	1.64658	1.16896	0.655123	25.1249	0.693879
PACRG	1.12146e-167	6.7461e-166	0.967375	1.68204	0.522296	27.5997	0.693833
CFAP43	1.63309e-140	6.72691e-139	1.48521	1.19572	0.648482	25.2355	0.69367
DSTN	3.54464e-116	1.12113e-114	2.71226	0.480639	0.895161	22.9118	0.692827
RP1	1.40383e-152	6.80197e-151	1.18663	1.4246	0.57685	26.3118	0.692819
TSPAN6	2.23763e-127	8.01575e-126	1.2974	1.10239	0.676945	24.009	0.692437
RUVBL1	6.49716e-137	2.59577e-135	1.22307	1.31525	0.61575	24.9054	0.69201
SAXO2	1.92935e-136	7.63171e-135	1.48494	1.15041	0.654649	24.8618	0.691519
FAM174A	1.60277e-122	5.47105e-121	1.5824	1.00328	0.719639	23.5396	0.691113
CFAP298	1.71989e-121	5.82097e-120	1.68708	0.977709	0.731025	23.4388	0.690956
STOML3	1.24636e-168	7.55448e-167	0.959786	1.67624	0.509962	27.6791	0.690865
IFT57	5.18659e-120	1.7297e-118	1.85469	0.938487	0.735769	23.2933	0.690616
WDR38	5.80545e-135	2.26271e-133	1.52537	1.14543	0.647533	24.7247	0.689591
MAGED2	5.91113e-125	2.06643e-123	1.21117	1.11435	0.6537	23.776	0.689244
CAT	1.38279e-149	6.46426e-148	0.881235	1.6551	0.531309	26.0489	0.688555
OSCP1	1.12601e-136	4.4651e-135	1.20343	1.29676	0.598197	24.8834	0.688142
CYB5A	8.37244e-112	2.52775e-110	2.42629	0.597622	0.85389	22.4689	0.687997
DNAJB13	2.33458e-156	1.18521e-154	0.957351	1.58311	0.522296	26.64	0.68779
NUCB2	7.7142e-111	2.28573e-109	2.47634	0.648506	0.871917	22.37	0.687186
CCDC146	2.41327e-125	8.49225e-124	1.60989	1.09044	0.672201	23.8136	0.687034
RPL3	3.95831e-108	1.14518e-106	3.53517	0.388007	0.928368	22.0898	0.686261
RABL2B	4.45213e-128	1.63153e-126	1.29372	1.18581	0.63093	24.0761	0.686141
LRTOMT	1.43976e-156	7.33266e-155	0.896234	1.67079	0.504744	26.6582	0.685593
TEKT2	2.22332e-135	8.68675e-134	1.23004	1.22048	0.598197	24.7634	0.685454
POU2AF1	5.47959e-165	3.18796e-163	0.871839	1.72158	0.48814	27.3748	0.685301
EFCAB10	5.62768e-152	2.68595e-150	0.995892	1.54105	0.519924	26.2591	0.684991
POLR2I	7.89457e-109	2.29648e-107	2.09977	0.731298	0.815939	22.1626	0.684884
FGF14	7.58616e-181	5.37471e-179	0.792251	1.92539	0.452087	28.6761	0.684813
WDR66	1.3733e-130	5.10299e-129	1.2578	1.22118	0.60389	24.3146	0.683842
FOXJ1	1.69867e-118	5.53751e-117	1.911	0.93839	0.727704	23.1433	0.6837
CFAP157	8.53978e-117	2.70641e-115	1.99701	0.912364	0.746679	22.9737	0.683519
EFCAB1	1.35633e-125	4.79408e-124	1.4715	1.08813	0.649905	23.8378	0.683482
NDUFB10	4.45029e-109	1.29693e-107	1.5922	0.744789	0.760911	22.1883	0.683343
FOLR1	3.23976e-161	1.78702e-159	0.83752	1.87439	0.472486	27.0561	0.683098
RFX3	1.4836e-131	5.57785e-130	1.13081	1.34779	0.573529	24.4058	0.682274
BX005040.1	6.0849e-214	6.1392e-212	0.628711	2.3803	0.393264	31.2179	0.68203
DNAH12	9.19143e-121	3.09115e-119	1.64223	1.00585	0.682163	23.3673	0.681917
MORF4L2	8.2382e-104	2.21459e-102	1.65398	0.739659	0.768501	21.636	0.679254
COLCA1	2.47402e-142	1.06017e-140	0.799638	1.64202	0.495731	25.4008	0.678129
WDR78	7.25583e-130	2.68365e-128	1.08563	1.30716	0.556926	24.2462	0.677711
UCP2	2.58952e-103	6.92609e-102	1.6859	0.781772	0.751898	21.5831	0.677442
CFAP206	1.3035e-170	8.11683e-169	0.710597	1.96092	0.432163	27.8432	0.677399
C11orf16	1.06473e-140	4.40854e-139	0.939278	1.4523	0.513283	25.2524	0.677312
RPL27	4.25114e-98	1.03938e-96	2.89347	0.374564	0.905123	21.0206	0.677096
BLOC1S1	1.49356e-103	4.00821e-102	1.41644	0.781968	0.725806	21.6085	0.67709
ATP5F1A	2.15094e-102	5.64878e-101	1.48625	0.765517	0.737192	21.485	0.67686
MSMB	2.08841e-107	5.91321e-106	2.78519	0.939195	0.732448	22.0146	0.676699
CRNDE	1.44237e-100	3.67298e-99	1.73557	0.742237	0.768027	21.2888	0.676261
DZIP3	6.13083e-127	2.19129e-125	1.11157	1.2967	0.557875	23.9671	0.67604
AC004556.1	4.64301e-214	4.7445e-212	0.482427	2.16217	0.37334	31.2266	0.675813
FAM227A	9.68894e-132	3.65133e-130	1.01605	1.36162	0.532732	24.4232	0.675479
C6orf118	2.59992e-131	9.75183e-130	0.98317	1.34952	0.530835	24.3829	0.674863
MZT2B	3.64999e-104	9.96311e-103	1.24445	0.877897	0.666509	21.6735	0.674859
MRPL40	2.93554e-105	8.06817e-104	1.22684	0.977568	0.663188	21.7892	0.674606
TAX1BP1	4.286e-97	1.02741e-95	1.88841	0.652492	0.80408	20.9106	0.674513
P4HTM	2.91761e-103	7.79056e-102	1.43264	0.945309	0.687856	21.5776	0.674085
ZBBX	5.8725e-118	1.89501e-116	1.22516	1.12538	0.59962	23.0897	0.674014
CCL15	3.28903e-190	2.53287e-188	0.615554	2.19573	0.389943	29.4174	0.674002
PIH1D3	1.27772e-147	5.86978e-146	0.809869	1.61043	0.467742	25.8749	0.673651
SLC22A4	7.54641e-142	3.21651e-140	0.826325	1.53245	0.483871	25.3569	0.673519
KIF9	6.5111e-100	1.64752e-98	1.85427	0.844948	0.736717	21.218	0.673323
SOD1	8.13878e-94	1.85079e-92	2.73401	0.447437	0.891366	20.5473	0.672957
C11orf74	1.42809e-123	4.95975e-122	0.985475	1.35843	0.537476	23.642	0.67288
DMKN	3.06314e-101	7.91403e-100	1.52264	0.904562	0.698292	21.3613	0.672853
ARPC1A	5.78126e-117	1.83584e-115	0.866755	1.25854	0.555028	22.9907	0.67274
DMAC1	1.59181e-107	4.53125e-106	0.987685	1.07014	0.611954	22.0269	0.672342
CCDC173	1.78342e-119	5.89823e-118	1.10643	1.19295	0.56167	23.2403	0.671006
C19orf70	4.287e-94	9.7907e-93	1.69981	0.684695	0.771347	20.5784	0.670848
AC084033.3	2.32038e-119	7.64238e-118	1.08297	1.18291	0.559298	23.229	0.670535
LRRC23	1.34458e-100	3.42944e-99	1.70666	0.897785	0.70351	21.2921	0.670467
PRKAR1A	2.866e-92	6.31908e-91	1.83539	0.650054	0.795066	20.3736	0.669818
ACBD3-AS1	1.40591e-153	6.93857e-152	0.724219	1.81858	0.428843	26.399	0.669515
RPS4X	1.03633e-88	2.18231e-87	3.87984	0.333566	0.956357	19.9684	0.668452
DYNC2LI1	1.4379e-115	4.52996e-114	0.927807	1.37081	0.526565	22.8507	0.667206
AL357093.2	4.15271e-108	1.19708e-106	1.52065	0.966808	0.620493	22.0877	0.667093
RUVBL2	9.16718e-94	2.07872e-92	1.58595	0.870816	0.701613	20.5415	0.666701
LRRC34	1.06921e-140	4.41562e-139	0.741751	1.68164	0.439753	25.2523	0.665819
ATF7IP2	9.59407e-128	3.47589e-126	0.781507	1.58554	0.469639	24.0442	0.665724
TNFAIP8L1	5.28005e-111	1.57032e-109	1.12541	1.12538	0.562144	22.3869	0.665615
ANG	2.66491e-143	1.16069e-141	0.612877	1.76467	0.426471	25.4882	0.665596
ARMC3	2.03299e-105	5.62636e-104	1.25245	1.03545	0.601044	21.806	0.665421
RPL10A	7.18317e-85	1.42068e-83	3.13182	0.338732	0.908918	19.5217	0.664548
FANK1	7.32539e-108	2.10025e-106	1.07162	1.14321	0.564042	22.062	0.664332
RSPH4A	1.07976e-114	3.38163e-113	1.00132	1.20438	0.530835	22.7625	0.664206
AC004832.1	7.92202e-112	2.3963e-110	0.995911	1.16362	0.543169	22.4713	0.663933
CES4A	2.74401e-126	9.74216e-125	0.838189	1.52391	0.469165	23.9046	0.663697
TRIP13	5.30865e-132	2.0101e-130	0.78928	1.67551	0.446395	24.4478	0.663523
LRRC46	5.80904e-99	1.4469e-97	1.4487	0.906482	0.655598	21.1149	0.66341
LRRC10B	4.30174e-121	1.44977e-119	0.879143	1.31701	0.493359	23.3997	0.663191
CFAP70	4.08724e-108	1.18034e-106	1.08582	1.16623	0.552657	22.0884	0.662997
CEP126	5.76492e-102	1.50407e-100	1.19406	1.04277	0.590607	21.4392	0.662637
DNAH9	1.67596e-104	4.58257e-103	1.17053	1.04094	0.579222	21.7093	0.661969
CFAP65	7.79708e-114	2.40878e-112	0.930114	1.19612	0.517552	22.6756	0.661914
KCNRG	1.03533e-150	4.91194e-149	0.637155	1.82878	0.40038	26.1481	0.661828
DNAI1	2.15569e-107	6.09289e-106	1.04556	1.10739	0.551708	22.0131	0.661477
CABCOCO1	7.34561e-122	2.49141e-120	0.810757	1.36445	0.47723	23.475	0.661467
AL121899.1	1.95186e-125	6.88377e-124	0.820166	1.47359	0.461575	23.8225	0.661455
SPATA18	1.24489e-98	3.07672e-97	1.30352	0.998336	0.610057	21.0788	0.661401
CATIP	1.92651e-123	6.67621e-122	0.818395	1.36109	0.472486	23.6293	0.661353
BASP1	4.31363e-93	9.64427e-92	1.45539	0.942479	0.639469	20.4662	0.661273
RGS22	1.43137e-139	5.85065e-138	0.725767	1.71277	0.419355	25.1495	0.661043
OSBPL6	2.24912e-142	9.69008e-141	0.709841	1.73553	0.414137	25.4045	0.661036
MORF4L1	7.87567e-83	1.51626e-81	1.81238	0.559696	0.801708	19.2802	0.660873
CERS4	3.41769e-110	1.00519e-108	0.797961	1.26492	0.511385	22.3035	0.660866
ALDH3B1	9.15708e-89	1.93855e-87	1.4911	0.865526	0.676945	19.9746	0.660616
TCTN1	5.95099e-101	1.52271e-99	1.04114	1.11207	0.562619	21.3302	0.660084
C6	5.58895e-194	4.47706e-192	0.54768	2.37546	0.336812	29.7107	0.659965
DALRD3	1.45124e-107	4.1385e-106	0.888596	1.34204	0.509488	22.0311	0.659921
C9orf135	2.39844e-96	5.65585e-95	1.3598	0.955082	0.611954	20.8283	0.659675
RAMP1	6.31517e-112	1.91388e-110	0.870283	1.32653	0.496205	22.4814	0.659531
AC007906.2	1.32344e-93	2.98823e-92	1.53489	0.891506	0.647059	20.5237	0.659492
RABAC1	6.00307e-85	1.18876e-83	1.3737	0.747903	0.683112	19.5309	0.659394
GON7	3.3445e-98	8.21489e-97	1.07317	1.12982	0.560247	21.032	0.658636
IFT172	1.43177e-91	3.12655e-90	1.1433	1.01211	0.609108	20.2947	0.658535
ENKUR	2.41744e-99	6.05919e-98	1.15421	1.03182	0.574478	21.1562	0.65844
TOGARAM2	1.81529e-108	5.27094e-107	0.973683	1.19218	0.516129	22.125	0.658253
TMEM107	1.0255e-109	2.99954e-108	0.854176	1.32768	0.49241	22.2543	0.658106
LAPTM4A	2.13613e-80	3.94121e-79	1.72741	0.581538	0.782258	18.9882	0.658025
CFAP45	2.05884e-96	4.88393e-95	1.24528	0.974122	0.594402	20.8356	0.657955
VAMP8	1.2345e-78	2.21862e-77	2.41438	0.413955	0.873814	18.7739	0.657761
STK33	1.72706e-107	4.90749e-106	0.925794	1.20407	0.513283	22.0232	0.657733
FIS1	1.40835e-80	2.6075e-79	1.58949	0.597877	0.752372	19.01	0.657605
TTC25	8.93028e-112	2.68599e-110	0.857739	1.29105	0.487666	22.466	0.657249
DNAH7	3.71181e-101	9.55897e-100	1.05439	1.14937	0.538425	21.3523	0.657164
TMC5	2.15081e-79	3.9184e-78	1.89619	0.622183	0.800759	18.8665	0.656907
EID1	2.41365e-81	4.53191e-80	1.46801	0.664198	0.71537	19.1024	0.656901
EFHC2	3.91183e-131	1.46038e-129	0.690301	1.62064	0.41888	24.3661	0.656845
DNAI2	9.84978e-105	2.7025e-103	1.00106	1.11599	0.527514	21.7337	0.656614
CTSH	1.83256e-82	3.51115e-81	1.33671	0.774007	0.694023	19.2365	0.656594
CC2D2A	9.08238e-107	2.54898e-105	0.877415	1.26848	0.5	21.9478	0.656507
DBI	2.58903e-79	4.70601e-78	1.68977	0.602371	0.765655	18.8567	0.656378
UBXN10	2.44231e-102	6.40343e-101	0.942185	1.14569	0.526565	21.4791	0.656186
HLA-DPA1	6.63384e-82	1.25743e-80	1.52617	0.763498	0.714421	19.1697	0.656104
NDUFB1	5.96083e-77	1.04305e-75	2.1754	0.460938	0.855787	18.5668	0.655964
TMEM173	1.03825e-86	2.10035e-85	1.10922	0.961185	0.620019	19.737	0.655939
DNAL1	1.76276e-102	4.637e-101	0.918398	1.24675	0.509013	21.4942	0.655696
IFT22	3.92512e-87	8.04246e-86	1.30216	0.911956	0.636148	19.7861	0.655638
RIBC1	1.50747e-112	4.60355e-111	0.803673	1.34226	0.469639	22.5449	0.655603
TBCA	1.48176e-76	2.57868e-75	2.15744	0.463092	0.840133	18.5179	0.655432
PPP1R42	2.49557e-118	8.08575e-117	0.747583	1.41848	0.446395	23.1267	0.654807
CD164	5.44586e-76	9.36488e-75	1.90485	0.5262	0.822581	18.4477	0.654375
NSMCE1	5.02664e-94	1.14635e-92	0.823747	1.1867	0.531309	20.5707	0.654274
SDHC	1.4382e-82	2.75888e-81	1.08242	0.845626	0.636622	19.249	0.653981
SEC14L3	3.01075e-170	1.86748e-168	0.56389	2.27364	0.337761	27.8131	0.653757
MPC2	1.22607e-80	2.2753e-79	1.20675	0.80481	0.65038	19.0173	0.653356
PRDX6	9.92523e-76	1.69944e-74	1.60178	0.587356	0.760436	18.4152	0.65263
GPR162	1.75805e-99	4.42036e-98	0.970651	1.09239	0.521822	21.1713	0.652616
SPEF2	2.23985e-94	5.13009e-93	1.06709	1.0513	0.547438	20.6098	0.652539
ALOX15	4.15381e-84	8.13463e-83	1.36858	0.925482	0.612429	19.4318	0.652339
ARFGEF3	1.29501e-85	2.59343e-84	0.999563	1.08713	0.574478	19.609	0.652287
MGST2	9.2691e-84	1.80413e-82	0.972575	0.941323	0.598197	19.3906	0.652148
PARK7	5.39708e-74	8.96197e-73	1.80587	0.509587	0.786528	18.1975	0.651684
TUFM	4.65031e-75	7.86949e-74	1.461	0.63402	0.739564	18.3314	0.651345
NAP1L1	2.49427e-74	4.16784e-73	1.71045	0.60785	0.757116	18.2398	0.651319
SCPEP1	1.68393e-84	3.31812e-83	1.07097	1.06699	0.575427	19.4781	0.650727
C7orf57	1.50061e-102	3.95392e-101	0.832662	1.20763	0.48055	21.5017	0.650564
TMEM231	9.20127e-89	1.94533e-87	1.17912	0.935432	0.582543	19.9744	0.650556
APOC1	4.4798e-117	1.4254e-115	0.721322	1.10307	0.436433	23.0017	0.650485
ATP5MPL	5.57905e-72	8.92033e-71	2.01893	0.439422	0.830645	17.9416	0.65047
MLF1	4.13936e-82	7.88358e-81	1.29516	0.93352	0.607685	19.1942	0.650461
DYNLT1	2.33137e-71	3.67601e-70	2.69133	0.399231	0.891841	17.862	0.650388
IQCG	2.13058e-88	4.43968e-87	1.09358	0.973093	0.570209	19.9324	0.650281
IRX3	3.22248e-83	6.24175e-82	1.03042	0.966052	0.585389	19.3264	0.649946
SPAG17	2.22378e-89	4.77111e-88	1.12762	0.945143	0.568786	20.0452	0.649946
PFN2	2.73987e-78	4.8855e-77	1.21079	0.832102	0.646584	18.7315	0.649864
CFAP73	4.96835e-87	1.01409e-85	1.18386	0.881137	0.591556	19.7742	0.649572
PIGR	2.36741e-72	3.80817e-71	2.57725	0.63735	0.798387	17.9892	0.64924
PSMB1	7.66568e-72	1.22321e-70	1.64753	0.547045	0.77277	17.924	0.649225
SPACA9	7.43176e-88	1.53657e-86	1.08466	0.995599	0.559772	19.8698	0.648997
FYB2	5.12046e-103	1.36042e-101	0.716009	1.35757	0.458729	21.5515	0.648915
STMND1	2.74657e-105	7.56185e-104	0.792848	1.31175	0.453985	21.7923	0.648808
SMIM19	3.11489e-80	5.73377e-79	1.00389	0.953811	0.591082	18.9684	0.648734
NWD1	2.94449e-98	7.25474e-97	0.867572	1.16951	0.488615	21.038	0.648452
LXN	6.51991e-102	1.69827e-100	0.729759	1.44295	0.451139	21.4334	0.648199
ARMC4	5.50755e-111	1.63493e-109	0.71574	1.37461	0.431689	22.385	0.648177
NDUFAF3	8.25767e-73	1.34048e-71	1.43115	0.665355	0.713947	18.0475	0.648173
MDH1B	3.54716e-108	1.0281e-106	0.731499	1.31685	0.442125	22.0948	0.648168
FHAD1	1.17659e-91	2.57284e-90	0.958766	1.07077	0.519924	20.3044	0.647618
VWA3B	7.16135e-94	1.63084e-92	0.942057	1.06835	0.509488	20.5535	0.647456
LRWD1	5.78653e-90	1.24991e-88	0.897966	1.14738	0.511385	20.1121	0.647043
SQLE	5.95383e-86	1.19384e-84	0.916301	1.12327	0.528937	19.6485	0.646765
DNAAF3	2.84277e-96	6.69375e-95	0.853127	1.1768	0.476755	20.8202	0.645914
TTLL10	2.36523e-92	5.22943e-91	0.928414	1.09383	0.501423	20.383	0.645793
SCP2	8.22846e-73	1.3371e-71	1.12909	0.732704	0.642315	18.0477	0.645537
CNPY2	1.85854e-84	3.65766e-83	0.755382	1.10948	0.513283	19.4731	0.645518
SERPINB6	8.43661e-70	1.30571e-68	1.44713	0.620108	0.740512	17.6606	0.645512
LINC01571	3.22428e-115	1.01178e-113	0.685716	1.45595	0.403226	22.8154	0.645503
AZIN1	8.74086e-72	1.39199e-70	1.37888	0.783919	0.665085	17.9167	0.645201
PGRMC1	2.62868e-74	4.38783e-73	1.03805	0.88371	0.614801	18.2369	0.64518
WDR34	9.09738e-73	1.47529e-71	1.30126	0.775875	0.660342	18.0421	0.645149
CCDC181	2.07414e-107	5.88324e-106	0.718224	1.45798	0.419355	22.0149	0.645006
RIPOR2	5.60197e-104	1.51615e-102	0.716712	1.35343	0.432163	21.6538	0.644796
UXT	2.59972e-70	4.05105e-69	1.22792	0.677337	0.675047	17.7269	0.644454
SIVA1	8.18037e-70	1.26728e-68	1.29994	0.677383	0.685484	17.6623	0.644246
NQO1	6.03156e-70	9.36214e-69	1.66121	0.72793	0.692125	17.6795	0.64401
PEBP1	1.4255e-68	2.14985e-67	1.42289	0.636436	0.711101	17.5003	0.643776
C20orf96	1.09276e-88	2.29508e-87	0.878552	1.12503	0.496679	19.9658	0.643769
SPATA33	6.9073e-87	1.40267e-85	0.874049	1.13272	0.5	19.7576	0.643667
UCKL1-AS1	3.01699e-128	1.10815e-126	0.570939	1.76889	0.359108	24.0922	0.643607
VSTM2L	2.12052e-85	4.23068e-84	0.825293	1.17473	0.497628	19.5839	0.642941
IQCD	9.58259e-89	2.02058e-87	0.86146	1.0961	0.492884	19.9724	0.642937
TUBA4B	3.9488e-85	7.82933e-84	1.02005	0.903951	0.534156	19.5522	0.642806
DNAH2	1.05431e-97	2.55811e-96	0.775515	1.2444	0.446395	20.9774	0.642556
IL20RA	1.77307e-92	3.93657e-91	0.684963	1.35444	0.450664	20.3971	0.642404
FKBP2	1.57764e-65	2.25553e-64	1.67101	0.504297	0.754744	17.0964	0.642238
EFCAB2	1.48592e-84	2.93519e-83	0.875324	1.13911	0.499526	19.4845	0.642119
SPEF1	2.59689e-84	5.10444e-83	0.946092	0.960348	0.520398	19.4559	0.641766
PSMB5	1.22053e-65	1.74654e-64	1.38624	0.623019	0.704459	17.1114	0.640756
FAM104B	3.10351e-84	6.09275e-83	0.800576	1.18558	0.486717	19.4468	0.64069
PHPT1	2.44923e-66	3.55262e-65	1.2861	0.632537	0.679317	17.2047	0.640448
ZBED5-AS1	6.80361e-98	1.65582e-96	0.609584	1.33917	0.421727	20.9983	0.640156
ZNF688	3.57319e-86	7.18288e-85	0.751515	1.15095	0.476281	19.6744	0.640133
CSNK2B	2.10315e-74	3.51797e-73	0.820432	0.935963	0.548387	18.2491	0.64002
EFHB	2.03595e-96	4.83683e-95	0.705724	1.18644	0.435009	20.8361	0.639691
PIP	9.53321e-138	3.82793e-136	0.581855	2.06006	0.325901	24.9823	0.639634
SLC7A2	8.55761e-93	1.90526e-91	0.694386	1.27655	0.439279	20.4327	0.639492
MAATS1	8.30471e-89	1.76044e-87	0.805981	1.14582	0.462998	19.9795	0.639066
DTHD1	3.79593e-84	7.44292e-83	0.904352	1.02383	0.49241	19.4364	0.638464
PLEKHB1	1.18272e-99	2.97847e-98	0.619539	1.38383	0.406072	21.1899	0.638273
N4BP2L2	1.21882e-63	1.66488e-62	1.36002	0.667962	0.710152	16.8411	0.638216
RSPH14	3.09894e-112	9.40956e-111	0.580689	1.53962	0.36907	22.513	0.63804
CTSS	1.56972e-62	2.08524e-61	1.62862	0.606253	0.735294	16.6892	0.637985
ATP2A2	1.15856e-62	1.54809e-61	1.548	0.618142	0.725806	16.7074	0.63788
LAMTOR4	3.53111e-62	4.65202e-61	1.46678	0.547014	0.741461	16.6408	0.637848
CFAP57	3.71741e-95	8.66363e-94	0.707073	1.28994	0.422676	20.6966	0.637814
KIF3A	7.4782e-87	1.51667e-85	0.717898	1.20603	0.45351	19.7535	0.637553
C16orf89	4.07975e-101	1.04896e-99	0.696424	1.64762	0.388046	21.3479	0.6375
RRAD	1.1179e-69	1.72679e-68	1.48562	0.733428	0.622391	17.6447	0.637409
NDUFA2	1.6027e-62	2.12728e-61	1.35961	0.596091	0.709677	16.688	0.637366
ATRAID	6.82686e-69	1.03842e-67	0.912129	0.838304	0.578748	17.5422	0.637349
CROCC	3.03765e-85	6.04534e-84	0.811302	1.17617	0.463947	19.5656	0.637295
HSD17B13	1.21452e-112	3.71605e-111	0.672689	1.77506	0.360531	22.5544	0.637278
CCDC74A	7.13706e-79	1.28847e-77	1.00198	0.938654	0.519924	18.803	0.637265
FAM81B	4.45222e-77	7.82501e-76	0.995051	0.903384	0.52704	18.5825	0.636356
NEK10	1.3017e-86	2.62997e-85	0.801789	1.14811	0.45351	19.7255	0.636144
CST6	1.62177e-89	3.49359e-88	0.838617	1.35788	0.428368	20.0609	0.636028
PLAC8	1.43218e-59	1.77807e-58	2.23497	0.465463	0.843454	16.2772	0.636006
KIF21A	6.68907e-63	8.99835e-62	1.37372	0.710259	0.669355	16.7401	0.635967
CUTA	4.27438e-60	5.39066e-59	1.48641	0.509557	0.740987	16.3511	0.635598
C1orf158	9.16547e-93	2.03775e-91	0.678556	1.23878	0.416983	20.4294	0.635047
ZC2HC1A	1.60265e-80	2.96378e-79	0.779262	1.19026	0.463947	19.0033	0.634956
MAP1A	6.20997e-87	1.26267e-85	0.766612	1.14501	0.444023	19.7629	0.634919
DENND6B	4.73117e-77	8.30612e-76	0.891119	0.977314	0.502846	18.5792	0.634818
HIPK1	8.66771e-66	1.24704e-64	1.13555	0.867409	0.590133	17.1313	0.634806
C2orf81	8.67635e-118	2.78289e-116	0.515226	1.7185	0.33871	23.0728	0.63471
AHSA1	1.64275e-62	2.17863e-61	1.25094	0.751405	0.642315	16.6865	0.634616
AKAP9	2.83423e-58	3.43578e-57	1.88413	0.509454	0.800285	16.0935	0.634474
AK7	2.33e-94	5.32892e-93	0.654254	1.31299	0.4037	20.6079	0.63432
HSPBP1	1.05777e-64	1.47912e-63	1.18376	0.828656	0.603416	16.9852	0.634305
SPCS1	1.64513e-58	2.00344e-57	1.64707	0.470402	0.763283	16.1271	0.634206
PTPRF	1.03407e-62	1.38405e-61	1.17776	0.769656	0.629507	16.7141	0.633775
KLHDC9	4.08521e-88	8.47947e-87	0.652663	1.30119	0.417457	19.8998	0.63362
CIRBP	4.11923e-57	4.86045e-56	1.95952	0.391844	0.847249	15.927	0.633608
MARCKS	1.1562e-59	1.43993e-58	1.39275	0.61742	0.699241	16.2903	0.633465
PLPP2	6.72891e-58	8.07115e-57	1.72475	0.494337	0.787951	16.0399	0.633407
TMED10	1.23657e-57	1.47656e-56	1.56266	0.484241	0.741935	16.002	0.63269
CFAP221	2.3933e-79	4.35521e-78	0.811538	1.03834	0.464896	18.8609	0.632183
NDUFS6	4.82082e-57	5.67568e-56	1.44963	0.497517	0.732448	15.9171	0.631859
C21orf2	4.12147e-75	6.98197e-74	0.683045	1.09157	0.471537	18.3379	0.631756
MUC15	5.79641e-67	8.50051e-66	0.91721	0.948599	0.538425	17.288	0.631351
SNRPN	6.88558e-75	1.16274e-73	0.666935	1.21478	0.45351	18.31	0.630666
SLC35A3	1.16038e-65	1.66345e-64	0.804494	0.943307	0.529886	17.1143	0.630132
AC133794.1	1.63756e-111	4.90682e-110	0.506292	1.67529	0.330171	22.439	0.629875
NLRP1	1.35198e-96	3.22152e-95	0.554104	1.5364	0.36148	20.8557	0.629617
TRAF3IP1	7.34563e-73	1.19486e-71	0.803288	1.05696	0.473909	18.0539	0.629596
SEC62	5.15945e-54	5.7275e-53	1.81999	0.415099	0.814991	15.4745	0.629522
SPAG7	1.30407e-60	1.67108e-59	0.94994	0.804086	0.583017	16.4232	0.629271
AK9	1.58703e-74	2.66304e-73	0.776124	1.01563	0.467742	18.2645	0.629246
NOP53	1.44956e-56	1.69037e-55	1.21081	0.59612	0.652751	15.8481	0.629026
PSMA4	9.28219e-56	1.06298e-54	1.31256	0.618781	0.685958	15.7309	0.628889
HAGHL	2.11728e-76	3.67264e-75	0.78708	1.06104	0.450664	18.4986	0.628759
MB	2.70931e-87	5.57279e-86	0.524312	1.41866	0.383302	19.8047	0.628558
NDUFA7	3.13927e-69	4.8026e-68	0.715695	1.05624	0.479602	17.5863	0.628469
ACAT1	1.32367e-83	2.57011e-82	0.582907	1.28945	0.399905	19.3722	0.627988
TP53TG1	2.10485e-60	2.6672e-59	0.944106	0.874381	0.559772	16.3942	0.62755
CLTA	8.79612e-52	9.26761e-51	2.01475	0.363363	0.832068	15.1402	0.627053
OCEL1	1.922e-71	3.04256e-70	0.687778	1.05248	0.45778	17.8728	0.627003
ETFB	5.86877e-60	7.3839e-59	0.864269	0.80148	0.557875	16.3317	0.626984
AK8	4.70338e-97	1.12577e-95	0.532127	1.4129	0.351992	20.9062	0.62696
FCGRT	2.42768e-60	3.07384e-59	0.83326	0.830902	0.548861	16.3855	0.626767
TCTEX1D1	5.50899e-80	1.00941e-78	0.692746	1.09414	0.417457	18.9384	0.626573
IQCA1	1.48693e-79	2.71203e-78	0.630612	1.24289	0.405123	18.886	0.626024
CFAP77	3.92913e-82	7.49214e-81	0.653489	1.19353	0.399905	19.1969	0.626021
SERTAD4-AS1	2.773e-75	4.71262e-74	0.621122	1.19257	0.422201	18.3595	0.625783
SF3B5	1.12839e-53	1.24396e-52	1.1478	0.595993	0.649431	15.424	0.625078
PPP1R14C	1.02076e-74	1.71645e-73	0.660215	1.23021	0.41888	18.2886	0.625032
DYNLRB1	6.4791e-51	6.73734e-50	1.63372	0.450187	0.755693	15.0083	0.62498
YWHAE	6.27674e-50	6.38529e-49	2.07218	0.35401	0.829696	14.8569	0.624723
CCDC113	4.73004e-64	6.48895e-63	0.975057	0.822351	0.519924	16.897	0.624689
SCGB2A1	5.48971e-74	9.10629e-73	0.740271	1.13004	0.428843	18.1966	0.62455
AC078864.2	1.75556e-90	3.81272e-89	0.579503	1.30295	0.361006	20.1711	0.624484
DPM1	2.04517e-66	2.97463e-65	0.666357	1.10861	0.458729	17.2151	0.624098
CTXN1	1.21776e-65	1.74414e-64	0.908043	0.871462	0.493833	17.1115	0.624037
XBP1	1.66886e-50	1.71745e-49	1.97963	0.511478	0.733871	14.9454	0.623993
ARHGAP18	1.59394e-52	1.71104e-51	1.36371	0.64191	0.654649	15.2521	0.623646
FBXO15	5.184e-87	1.05675e-85	0.550817	1.26456	0.366224	19.772	0.623601
SCCPDH	3.28779e-60	4.1497e-59	0.791814	0.956826	0.506641	16.367	0.623315
ANKUB1	5.16034e-80	9.47707e-79	0.662511	1.20189	0.390892	18.9418	0.623173
TMEM232	2.50642e-75	4.26868e-74	0.691201	1.07577	0.41556	18.365	0.623124
FUZ	1.74664e-66	2.5474e-65	0.750583	0.991412	0.461101	17.2243	0.622752
STOX1	1.38588e-74	2.32796e-73	0.629153	1.13666	0.409393	18.2719	0.622721
NDUFA1	3.50239e-48	3.40644e-47	2.1655	0.332557	0.861954	14.5849	0.622628
CCDC114	2.99658e-58	3.62432e-57	1.1383	0.691254	0.57685	16.09	0.622422
MRPL12	3.25999e-81	6.09947e-80	0.462334	1.2909	0.370019	19.0867	0.622258
MAP9	1.44909e-62	1.92661e-61	0.815084	0.959361	0.48482	16.694	0.622012
ECI2	5.29375e-96	1.23917e-94	0.457326	1.56637	0.324953	20.7903	0.621953
MYCBP	3.50064e-57	4.13667e-56	0.894472	0.843502	0.537951	15.9371	0.621762
NHLRC4	5.731e-90	1.23959e-88	0.516984	1.27959	0.3463	20.1125	0.62154
DRAM2	5.08114e-62	6.67753e-61	0.710238	1.05168	0.472011	16.619	0.621464
NPHP1	1.2991e-61	1.69745e-60	0.88782	0.841921	0.502846	16.5626	0.621374
WDR61	1.88081e-65	2.68175e-64	0.600951	1.09604	0.441176	17.0862	0.621198
PRUNE2	3.83853e-98	9.39939e-97	0.491495	1.62899	0.316888	21.0254	0.621046
NME7	3.89502e-64	5.35724e-63	0.764461	1.05222	0.454934	16.9085	0.620941
LINC01513	1.32878e-113	4.0892e-112	0.399214	1.67139	0.288425	22.6521	0.62088
VPS35	1.27958e-50	1.32367e-49	1.15354	0.67449	0.623814	14.9631	0.620555
B9D2	7.20948e-61	9.27574e-60	0.788829	0.920005	0.483871	16.4592	0.620457
ACADM	2.12018e-66	3.08092e-65	0.62142	1.18205	0.427894	17.213	0.620431
C1orf87	6.14956e-79	1.11145e-77	0.587511	1.13133	0.379981	18.8109	0.620417
CCDC189	5.28689e-65	7.45826e-64	0.789503	0.955401	0.457306	17.0258	0.62036
DNAH6	3.45675e-65	4.88944e-64	0.8189	0.907442	0.461101	17.0506	0.620291
PPP1R32	2.20422e-73	3.60015e-72	0.703288	1.01922	0.407495	18.1203	0.620109
EMG1	3.76035e-83	7.26591e-82	0.446192	1.36857	0.350569	19.3184	0.620062
CDC16	1.69774e-58	2.06593e-57	0.796072	1.03831	0.485294	16.1252	0.620039
MTURN	9.33248e-79	1.68101e-77	0.472369	1.28758	0.367173	18.7888	0.620013
BUD23	1.22412e-49	1.2327e-48	1.12679	0.633197	0.640892	14.8121	0.619873
GADD45GIP1	2.27892e-47	2.17926e-46	1.45906	0.464089	0.724383	14.4566	0.61968
BANF1	4.74203e-48	4.58972e-47	1.3389	0.53912	0.691176	14.5642	0.619671
LRRC71	1.94912e-68	2.93122e-67	0.724523	0.950362	0.43074	17.4825	0.619379
DLEC1	1.48669e-61	1.94098e-60	0.897192	0.821639	0.481025	16.5545	0.618788
C5orf15	1.94009e-55	2.20277e-54	0.821135	0.912059	0.513283	15.6842	0.61873
IFT88	1.12485e-63	1.53785e-62	0.757536	0.989895	0.446869	16.8459	0.618725
PARVA	6.78827e-59	8.34324e-58	0.676427	0.977457	0.471063	16.1817	0.618505
ZKSCAN1	1.2987e-50	1.34258e-49	1.03545	0.753158	0.583491	14.9621	0.618319
PSMB7	4.48283e-49	4.44961e-48	1.06096	0.648418	0.617173	14.7246	0.61829
CCDC151	1.80037e-74	3.01468e-73	0.62238	1.10938	0.38425	18.2576	0.618234
VPS28	7.28106e-47	6.88827e-46	1.2308	0.528452	0.681214	14.3764	0.617802
KIF19	7.90028e-72	1.25938e-70	0.633441	1.06925	0.393264	17.9223	0.617454
NDUFAF8	2.11202e-52	2.25655e-51	0.819304	0.778591	0.537002	15.2337	0.617445
MYCBPAP	1.79795e-94	4.1239e-93	0.471507	1.42742	0.31167	20.6205	0.617367
NDUFAB1	1.83318e-45	1.67658e-44	1.49479	0.462626	0.731025	14.1513	0.617218
UBAC1	2.86276e-53	3.1257e-52	0.886748	0.842953	0.523719	15.3638	0.617089
PLPPR3	4.95234e-128	1.81067e-126	0.346097	1.83012	0.254744	24.0717	0.617064
HBB	5.0896e-92	1.11908e-90	0.585749	1.73978	0.310721	20.3455	0.616921
DDX17	2.66675e-44	2.37755e-43	1.81623	0.426687	0.79981	13.9618	0.616875
TEX26	9.24289e-84	1.80123e-82	0.612919	1.30262	0.339658	19.3907	0.616863
SRSF5	9.15657e-45	8.25126e-44	1.51568	0.45388	0.761385	14.0378	0.616759
TMC4	1.71314e-47	1.64315e-46	1.10645	0.642147	0.629507	14.4762	0.616665
HYDIN	4.94962e-56	5.70925e-55	0.987814	0.722847	0.519924	15.7707	0.616542
SMDT1	4.86177e-45	4.4085e-44	1.47554	0.438904	0.722486	14.0826	0.616523
MSI2	3.30227e-49	3.29215e-48	0.992888	0.692093	0.587761	14.7452	0.61651
C14orf132	3.47528e-119	1.13991e-117	0.377817	1.86755	0.262334	23.2116	0.616487
DCTN3	3.974e-51	4.1432e-50	0.835546	0.806575	0.537002	15.0407	0.616168
ASL	2.10324e-62	2.78239e-61	0.60295	1.1145	0.420304	16.6718	0.616093
SYAP1	1.10763e-48	1.09066e-47	0.968483	0.742865	0.573055	14.6633	0.615884
TRMT9B	1.55511e-110	4.59926e-109	0.40717	1.85468	0.270873	22.3387	0.615755
CFAP20	5.94027e-60	7.46797e-59	0.680827	1.0297	0.441176	16.331	0.615703
LZTFL1	1.92318e-59	2.38394e-58	0.706987	0.967403	0.444972	16.2592	0.615217
VAPA	2.5852e-43	2.23849e-42	1.65439	0.40561	0.788899	13.799	0.615162
COA3	5.81323e-46	5.37834e-45	1.11762	0.593888	0.631879	14.2318	0.615081
DAW1	9.7325e-74	1.60606e-72	0.567267	1.14947	0.365275	18.1652	0.615072
GAS2L2	4.87146e-77	8.53361e-76	0.54263	1.17861	0.352941	18.5777	0.615056
PPIL6	5.37463e-52	5.68527e-51	1.08032	0.686941	0.552182	15.1726	0.614887
TMEM98	2.54154e-57	3.01224e-56	0.611955	1.0166	0.447343	15.9571	0.614883
HSPH1	1.86868e-43	1.62336e-42	1.93624	0.475397	0.759013	13.8223	0.61487
AAMDC	3.23186e-63	4.37343e-62	0.533014	1.10554	0.405598	16.7833	0.614795
COMMD3	2.05062e-60	2.60262e-59	0.569629	0.981392	0.425047	16.3958	0.614171
HAGH	2.04121e-51	2.1323e-50	0.783962	0.871352	0.50759	15.0847	0.614146
SLC2A10	6.92848e-63	9.31255e-62	0.550555	1.18098	0.40038	16.738	0.614131
SERPINF1	8.01737e-51	8.32605e-50	0.894693	0.835904	0.51186	14.9942	0.614055
CCNI	4.28584e-43	3.68305e-42	1.4719	0.421415	0.714896	13.7625	0.613972
DAD1	6.54083e-43	5.59374e-42	1.50272	0.42287	0.72723	13.7319	0.613902
TRAPPC2L	4.7025e-52	4.9809e-51	0.72954	0.865381	0.495256	15.1813	0.613856
KNDC1	1.0566e-75	1.80722e-74	0.561263	1.24407	0.348197	18.4118	0.613828
MAP1B	1.47152e-66	2.1501e-65	0.667319	1.03597	0.392789	17.2342	0.613737
TUBGCP2	2.47769e-50	2.53673e-49	0.846671	0.878327	0.513283	14.9191	0.613614
ZNF273	1.36614e-62	1.81935e-61	0.694519	1.03731	0.412239	16.6975	0.613526
RAB36	8.47848e-60	1.06004e-58	0.754841	0.87259	0.441651	16.3093	0.61347
ALDH1L1	1.1522e-71	1.8294e-70	0.532155	1.26998	0.356262	17.9013	0.613364
SCAND1	5.54695e-42	4.649e-41	1.58962	0.381186	0.76186	13.5761	0.613194
AKR7A2	1.35943e-49	1.36723e-48	0.830143	0.764618	0.524194	14.805	0.613015
NEDD8	2.27135e-42	1.92184e-41	1.4005	0.434527	0.719165	13.6414	0.612949
RABL2A	9.92219e-59	1.21669e-57	0.72704	0.927183	0.434535	16.1583	0.61264
APP	1.70657e-42	1.44859e-41	1.31196	0.488598	0.699715	13.6622	0.612554
EIF3E	2.77781e-44	2.4738e-43	1.06255	0.583135	0.618121	13.9589	0.612331
EMC2	1.80532e-60	2.29678e-59	0.575749	1.13414	0.4037	16.4035	0.612118
LAMTOR5	1.32265e-41	1.09872e-40	1.48248	0.419849	0.734345	13.5123	0.61203
PPOX	1.62996e-60	2.08032e-59	0.658393	1.03066	0.410342	16.4097	0.611947
AL353622.1	4.76914e-90	1.03295e-88	0.44286	1.53176	0.29222	20.1217	0.611631
ATP6AP2	9.93215e-47	9.35747e-46	0.819934	0.731382	0.544592	14.3549	0.611518
SSB	2.03178e-41	1.68428e-40	1.45007	0.503488	0.697818	13.4807	0.610975
PTPRN2	2.59651e-53	2.84083e-52	0.677299	0.948825	0.449241	15.3701	0.610858
SMYD2	4.02409e-55	4.53663e-54	0.688304	0.943466	0.440228	15.6378	0.610858
NBEA	1.38461e-52	1.49035e-51	0.734938	0.943036	0.459677	15.2613	0.61078
PLA2G16	3.81901e-46	3.54772e-45	0.895547	0.758504	0.539848	14.2612	0.610659
ESD	9.77818e-56	1.11898e-54	0.589951	1.01495	0.425522	15.7276	0.610616
SCGB3A1	1.09843e-39	8.67262e-39	4.55068	0.384182	0.960152	13.1831	0.610565
ABHD14A	5.21929e-104	1.41498e-102	0.316469	1.59745	0.260436	21.657	0.610408
DHRS7B	1.13669e-59	1.41674e-58	0.536991	1.14025	0.393264	16.2914	0.610386
CAPS2	7.5828e-68	1.13181e-66	0.570404	1.161	0.357685	17.4048	0.610327
MORN3	6.11828e-65	8.62348e-64	0.587233	1.0446	0.374288	17.0172	0.6103
EPCAM	1.93613e-40	1.558e-39	1.43943	0.440106	0.723909	13.3133	0.610099
ABI2	1.26578e-51	1.32749e-50	0.717868	0.933297	0.458729	15.1162	0.609975
NAA38	2.6887e-40	2.15922e-39	1.42244	0.430102	0.725332	13.2888	0.609971
CYP4X1	2.82153e-61	3.65972e-60	0.545376	1.18477	0.380455	16.5159	0.609858
AC027644.3	1.40566e-69	2.16709e-68	0.451828	1.19666	0.342505	17.6317	0.609807
FDXR	2.55557e-61	3.32016e-60	0.584881	1.18585	0.379981	16.5218	0.60978
TTC21A	1.19015e-59	1.48105e-58	0.648208	0.972825	0.401803	16.2886	0.609707
GABARAPL2	9.15278e-40	7.24451e-39	1.42645	0.415867	0.726755	13.1968	0.609363
CFAP74	9.18087e-59	1.12665e-57	0.656568	0.907268	0.404175	16.1631	0.608834
SORBS2	1.0642e-49	1.07234e-48	0.744766	0.895489	0.468216	14.8215	0.608758
CACNG6	2.65309e-81	4.97563e-80	0.43975	1.37157	0.300759	19.0974	0.608748
CCP110	5.43258e-53	5.89121e-52	0.713923	0.88671	0.444023	15.3222	0.608729
DCDC1	3.0177e-66	4.36526e-65	0.574837	1.14437	0.355787	17.1926	0.608699
PKIG	2.57048e-53	2.81429e-52	0.682455	0.835203	0.443548	15.3708	0.60866
CCNDBP1	2.19051e-48	2.14358e-47	0.717718	0.915434	0.476755	14.6169	0.608649
MRLN	8.34633e-84	1.6285e-82	0.457991	1.39572	0.29222	19.396	0.608197
SMIM14	1.62104e-39	1.27233e-38	1.29423	0.471732	0.684535	13.1537	0.60805
PLEKHS1	4.18764e-43	3.6006e-42	1.02186	0.593183	0.594877	13.7642	0.608032
TMEM123	4.1976e-39	3.26091e-38	1.28729	0.472915	0.685009	13.0816	0.607533
CCDC74B	1.42297e-58	1.73821e-57	0.644203	0.944984	0.394213	16.1361	0.607532
BX005214.2	2.57768e-115	8.1047e-114	0.315796	1.76799	0.235294	22.8252	0.607514
BCO2	1.13069e-62	1.51211e-61	0.56885	1.09215	0.363378	16.7088	0.607424
MAPK10	9.52866e-50	9.6381e-49	0.761594	0.87127	0.458254	14.8289	0.607262
P4HA2	3.78294e-52	4.01223e-51	0.647397	0.868915	0.436433	15.1956	0.607248
MGMT	4.13357e-44	3.6587e-43	0.850466	0.749349	0.524194	13.9305	0.60715
ACYP1	1.52448e-50	1.57191e-49	0.740149	0.906727	0.446395	14.9514	0.607084
CCT7	6.40748e-41	5.22999e-40	0.987314	0.624918	0.59203	13.3957	0.606753
CBY1	3.01628e-53	3.29107e-52	0.619585	0.924865	0.418406	15.3604	0.606728
CHCHD6	2.65783e-60	3.35991e-59	0.507341	1.17101	0.363378	16.38	0.606701
FAM47E	2.1946e-73	3.58811e-72	0.440945	1.30473	0.310721	18.1205	0.606427
PDIA4	1.87739e-39	1.46991e-38	1.06287	0.553712	0.614326	13.1426	0.605895
ENAH	2.06808e-41	1.71347e-40	0.959481	0.671066	0.556926	13.4794	0.60537
FGGY	2.6492e-43	2.29018e-42	0.826608	0.757831	0.512808	13.7972	0.605348
CP	6.0005e-42	5.02121e-41	1.05221	0.619897	0.566414	13.5704	0.60523
MRPL55	9.04336e-43	7.70087e-42	0.756454	0.721311	0.516603	13.7084	0.605092
MAP6	7.37274e-63	9.88468e-62	0.519509	1.02533	0.34962	16.7343	0.60507
PALMD	1.95453e-76	3.39773e-75	0.411894	1.38571	0.292694	18.503	0.604971
PIH1D2	3.8211e-59	4.71457e-58	0.565174	1.04885	0.363378	16.2171	0.6048
PRR15	4.21559e-40	3.36219e-39	1.01044	0.580847	0.592505	13.2551	0.604604
CNTD1	1.26382e-97	3.04789e-96	0.383194	1.72496	0.247154	20.9688	0.604522
FAIM	7.16878e-50	7.27419e-49	0.601153	0.97162	0.417457	14.848	0.604169
SHROOM3	1.73815e-45	1.59149e-44	0.780862	0.833647	0.470114	14.155	0.604088
TEKT4	5.00369e-58	6.01991e-57	0.577321	0.857801	0.373814	16.0583	0.604084
WDR93	1.22727e-68	1.85439e-67	0.470441	1.17279	0.315465	17.5088	0.603776
CFAP44	2.46825e-47	2.35748e-46	0.811453	0.787967	0.456357	14.4511	0.603772
TSPAN13	3.17145e-38	2.40743e-37	1.17025	0.585232	0.598197	12.927	0.603658
LAMTOR2	1.29005e-38	9.87739e-38	0.965519	0.576883	0.585863	12.9959	0.603626
CCDC65	8.43308e-52	8.89099e-51	0.688045	0.829267	0.412713	15.143	0.603502
KIAA1841	8.56173e-51	8.88558e-50	0.595545	0.995646	0.405123	14.9898	0.603246
MINOS1	2.63404e-35	1.86868e-34	1.58639	0.36949	0.757116	12.3994	0.603228
RBX1	4.94589e-35	3.48706e-34	1.64236	0.338535	0.760911	12.3488	0.603119
COPS6	1.45732e-40	1.17626e-39	0.79652	0.683809	0.528937	13.3345	0.603094
NELFE	1.07951e-38	8.28125e-38	0.97983	0.63508	0.570683	13.0096	0.603042
COPE	8.04804e-36	5.81041e-35	1.31445	0.412996	0.685009	12.494	0.602952
UNC119B	4.21259e-53	4.58381e-52	0.576487	0.983593	0.383776	15.3387	0.602782
CETN3	7.86499e-57	9.20527e-56	0.493145	1.11908	0.355787	15.8865	0.602756
CMTM4	5.16904e-53	5.62072e-52	0.517752	1.02768	0.380455	15.3255	0.602693
IFT81	1.51189e-48	1.4868e-47	0.6679	0.934987	0.416509	14.6422	0.602313
BAIAP3	3.75308e-57	4.4317e-56	0.601778	1.00236	0.360057	15.9328	0.602277
CFAP299	9.3316e-61	1.19964e-59	0.505502	1.02189	0.340607	16.4435	0.602231
OXTR	7.83394e-69	1.19047e-67	0.473992	1.21638	0.30408	17.5344	0.602021
CCDC187	1.49729e-49	1.50414e-48	0.724538	0.751488	0.423624	14.7985	0.601999
PSMA1	9.5175e-39	7.31173e-38	0.860297	0.668059	0.545541	13.0192	0.601895
ERICH5	1.31954e-57	1.57446e-56	0.479715	1.08611	0.347249	15.998	0.601703
NFIA	3.58475e-41	2.9456e-40	0.753411	0.771853	0.493833	13.4387	0.601487
MARCH6	2.45461e-38	1.86951e-37	0.906757	0.672895	0.550759	12.9466	0.601357
PNKD	1.58283e-36	1.15584e-35	0.993054	0.535509	0.601992	12.6227	0.601051
TUBA1B	8.4369e-34	5.73774e-33	1.76193	0.349796	0.764231	12.1184	0.601012
LINC02345	6.02034e-77	1.0523e-75	0.392361	1.38291	0.273245	18.5663	0.600996
LPAR3	2.8558e-64	3.94491e-63	0.430834	1.28174	0.308349	16.9268	0.600815
BCAS1	1.01348e-40	8.2218e-40	0.746813	0.726043	0.494307	13.3616	0.600546
ORMDL2	8.95513e-37	6.57548e-36	0.92559	0.578573	0.578273	12.6675	0.600402
CLDN8	6.32654e-98	1.54207e-96	0.306748	1.62834	0.231025	21.0017	0.600397
LRRC61	2.56611e-54	2.85859e-53	0.520995	1.06454	0.354364	15.5194	0.600322
FSD1L	3.97781e-67	5.85506e-66	0.440867	1.22915	0.298387	17.3097	0.600275
WDR13	3.52877e-38	2.67485e-37	0.878927	0.707146	0.529886	12.9187	0.600264
CHST6	2.0796e-45	1.89759e-44	0.681501	0.841588	0.431689	14.1424	0.600157
MAPK8IP3	4.31412e-65	6.09676e-64	0.101747	-1.1656	0.0863378	-17.0377	0.399975
SSFA2	1.00474e-42	8.55125e-42	0.314021	-0.756502	0.266603	-13.7008	0.399915
CD82	1.52033e-40	1.22588e-39	0.36199	-0.721228	0.31167	-13.3314	0.399863
C17orf49	1.10708e-79	2.02385e-78	0.0390807	-1.23977	0.0426945	-18.9016	0.399821
CSRP1	2.12848e-48	2.08416e-47	0.206853	-0.908368	0.19592	-14.6189	0.399774
PSEN1	1.843e-60	2.34097e-59	0.107121	-0.927581	0.108159	-16.4022	0.399686
THRB	4.80331e-57	5.65924e-56	0.130417	-1.03165	0.129981	-15.9173	0.399627
ETV7	1.37184e-80	2.54286e-79	0.0378365	-1.29768	0.0417457	-19.0114	0.399588
SMAP1	1.00974e-49	1.0194e-48	0.185596	-0.883174	0.185958	-14.825	0.399575
MAP1LC3B	4.31189e-37	3.18516e-36	0.552522	-0.665353	0.409867	-12.7247	0.399401
JMJD1C	3.1971e-40	2.56234e-39	0.401692	-0.650769	0.317837	-13.2758	0.399342
JOSD1	2.02518e-61	2.63754e-60	0.102062	-1.05907	0.107685	-16.5358	0.399204
IGLV3-19	8.82562e-106	2.46391e-104	0	-3.34522	0	-21.8442	0.399011
TOR1B	1.99582e-72	3.21368e-71	0.0593266	-1.13938	0.0654649	-17.9987	0.399006
MIER1	6.75076e-50	6.85875e-49	0.185789	-0.847664	0.184061	-14.852	0.398997
AC116366.3	1.89666e-99	4.76135e-98	0.0108206	-1.63011	0.0085389	-21.1677	0.398809
SLC38A1	5.64406e-67	8.28471e-66	0.0723455	-1.21694	0.0868121	-17.2895	0.398797
MKNK2	3.31449e-42	2.79262e-41	0.35113	-0.768788	0.298387	-13.6138	0.39846
TNFRSF21	2.68233e-41	2.2132e-40	0.387087	-0.723585	0.322106	-13.4602	0.39831
SIK1B	9.25645e-89	1.9544e-87	0.0239709	-1.39848	0.0275142	-19.9741	0.398302
ARAP2	1.09712e-58	1.34326e-57	0.141382	-0.96627	0.125712	-16.1521	0.398046
SPCS3	1.79298e-43	1.55844e-42	0.312203	-0.789419	0.27704	-13.8253	0.398043
RBMS2	3.26881e-68	4.90199e-67	0.0802344	-1.14558	0.0839658	-17.453	0.397971
MARS	1.91466e-55	2.17545e-54	0.165009	-0.943885	0.146584	-15.685	0.397915
BCL9L	8.03174e-60	1.00577e-58	0.138332	-0.951804	0.120493	-16.3126	0.39768
PSMB10	1.16769e-40	9.45839e-40	0.428761	-0.680993	0.339184	-13.3511	0.397672
GLTP	2.60719e-55	2.95389e-54	0.146783	-1.01482	0.15797	-15.6654	0.397395
YARS	2.70672e-60	3.41901e-59	0.120422	-1.16142	0.124288	-16.3789	0.397333
RAB8A	1.39452e-51	1.46058e-50	0.182857	-0.88241	0.182638	-15.1099	0.397243
TRA2B	1.89016e-40	1.52254e-39	0.435771	-0.683853	0.35389	-13.3151	0.397241
RBFOX2	1.44251e-60	1.84403e-59	0.11614	-0.965068	0.120968	-16.4171	0.397232
MCU	1.5721e-58	1.91597e-57	0.139388	-0.918952	0.13093	-16.1299	0.397068
TNFRSF10B	8.26056e-75	1.39198e-73	0.0631049	-1.2729	0.0649905	-18.3001	0.396867
PCBP1	3.1415e-35	2.22473e-34	1.23777	-0.357482	0.668406	-12.3852	0.396821
C3orf52	4.40049e-70	6.83705e-69	0.0788852	-1.27299	0.0820683	-17.6973	0.396764
RANGAP1	4.47763e-65	6.32222e-64	0.112148	-1.10107	0.100569	-17.0355	0.396624
CD151	1.26048e-39	9.93243e-39	0.622668	-0.621889	0.391366	-13.1727	0.39658
ARRDC2	4.80208e-68	7.18105e-67	0.0928176	-1.39715	0.0920304	-17.431	0.396559
GPX2	4.78108e-57	5.63721e-56	0.191101	-1.24658	0.153226	-15.9176	0.396462
LGALS7	5.3526e-108	1.54018e-106	0.00112771	-2.14637	0.000948767	-22.0762	0.396427
ZBTB43	1.37317e-56	1.60247e-55	0.164318	-0.980946	0.150854	-15.8515	0.396384
HGS	6.48305e-45	5.86196e-44	0.339657	-0.71758	0.265655	-14.0622	0.39628
BAG3	1.18574e-46	1.11582e-45	0.292926	-0.811829	0.247154	-14.3426	0.396274
POF1B	6.68629e-91	1.45609e-89	0.0296857	-1.29805	0.0270398	-20.2188	0.396136
KLF3	1.04284e-43	9.11395e-43	0.357158	-0.762918	0.306452	-13.8643	0.396052
SOCS1	2.12386e-96	5.03069e-95	0.0150435	-1.78355	0.0194497	-20.8341	0.395866
SLC12A7	6.53368e-47	6.18488e-46	0.327353	-0.77688	0.245256	-14.3839	0.395809
GABARAPL1	1.29869e-62	1.73242e-61	0.0990148	-1.23004	0.123814	-16.7005	0.395706
STK38	2.41116e-48	2.35661e-47	0.25735	-0.778259	0.231499	-14.6104	0.395675
MTG1	4.97087e-84	9.72277e-83	0.0433597	-1.29749	0.0426945	-19.4226	0.395657
AUP1	1.2441e-41	1.03508e-40	0.447907	-0.696946	0.362903	-13.5168	0.395637
RHEB	3.9543e-39	3.0764e-38	0.629083	-0.598236	0.452562	-13.0861	0.395564
TCEA1	6.4208e-41	5.23818e-40	0.485785	-0.664403	0.386148	-13.3955	0.395306
YWHAG	7.48287e-48	7.21624e-47	0.281702	-0.816165	0.241461	-14.533	0.395274
INF2	3.99764e-89	8.53097e-88	0.0372128	-1.38066	0.0332068	-20.016	0.39521
ADIRF	3.50016e-49	3.48725e-48	0.340294	-1.07987	0.241461	-14.7413	0.395004
MAT2A	3.67235e-48	3.56305e-47	0.264012	-0.861374	0.244782	-14.5817	0.394905
SERPING1	3.03801e-57	3.59531e-56	0.177002	-0.98524	0.156546	-15.946	0.394793
GNB2	7.51203e-37	5.5337e-36	1.13505	-0.382442	0.647059	-12.6813	0.394658
XRN1	1.61105e-55	1.83179e-54	0.185694	-0.954991	0.169829	-15.696	0.394634
DRAP1	1.27485e-40	1.03159e-39	0.540625	-0.685809	0.415085	-13.3445	0.394586
NPEPPS	1.1806e-43	1.03123e-42	0.411992	-0.667842	0.316414	-13.8554	0.394554
SPAG9	2.38074e-55	2.69925e-54	0.197677	-0.939524	0.169829	-15.6712	0.394531
PITPNB	3.18987e-63	4.32028e-62	0.116241	-1.01828	0.120019	-16.7841	0.394406
SH2D4A	7.19472e-63	9.65413e-62	0.122568	-1.08593	0.124288	-16.7357	0.394258
AMD1	8.60541e-50	8.72084e-49	0.249021	-0.939919	0.235294	-14.8357	0.394188
PAX9	1.33005e-50	1.3732e-49	0.237707	-0.917972	0.227704	-14.9605	0.394113
SERPINB1	2.16829e-37	1.61744e-36	1.19322	-0.482965	0.656072	-12.7783	0.394109
NAA50	2.23346e-50	2.29109e-49	0.238819	-0.832056	0.224383	-14.926	0.394083
MARCH5	7.32841e-57	8.58356e-56	0.166918	-0.941061	0.163188	-15.8909	0.394074
ARIH2	4.89298e-56	5.64801e-55	0.193093	-0.811775	0.165085	-15.7714	0.394046
TNFSF13B	1.05481e-99	2.66056e-98	0.019119	-1.87939	0.0170778	-21.1953	0.393989
HEXIM1	1.89718e-58	2.3051e-57	0.155951	-1.17393	0.154649	-16.1183	0.393981
CDK16	3.29387e-52	3.5005e-51	0.208364	-0.852924	0.207306	-15.2046	0.393916
CLDND1	6.1765e-66	8.91844e-65	0.106382	-1.07738	0.110057	-17.151	0.393891
ABRACL	5.30688e-49	5.26428e-48	0.26986	-0.8715	0.25	-14.7132	0.393689
ARHGEF3	5.39899e-78	9.59479e-77	0.0628164	-1.18658	0.0649905	-18.6954	0.39359
CNBP	2.43888e-39	1.90393e-38	0.748365	-0.542584	0.514706	-13.1228	0.393504
IER5	1.52362e-63	2.07236e-62	0.114969	-1.20634	0.127135	-16.8279	0.393503
RELA	3.27424e-58	3.95414e-57	0.163688	-0.918019	0.157021	-16.0845	0.393269
MIDN	7.43496e-40	5.89655e-39	0.714187	-0.574938	0.48482	-13.2125	0.393246
HNRNPL	5.99489e-56	6.89499e-55	0.191637	-0.901471	0.175047	-15.7586	0.39304
BZW1	3.45293e-41	2.83874e-40	0.600175	-0.625542	0.436433	-13.4415	0.392908
TVP23B	4.70861e-58	5.67347e-57	0.170977	-0.902121	0.160816	-16.062	0.39282
HRASLS2	2.626e-46	2.44945e-45	0.477077	-0.920301	0.306926	-14.2873	0.392819
KLHDC7B	5.51855e-101	1.41661e-99	0.013954	-1.75018	0.0175522	-21.3338	0.392794
SF3A2	1.32002e-75	2.25535e-74	0.0783087	-1.13709	0.0744782	-18.3997	0.392712
DCXR	3.00793e-46	2.79914e-45	0.36081	-0.839617	0.310721	-14.2778	0.392664
MSLN	2.57446e-52	2.74511e-51	0.35989	-0.923716	0.217268	-15.2208	0.392596
RBBP6	2.93987e-46	2.73901e-45	0.385904	-0.75188	0.305977	-14.2794	0.392355
NOP10	8.73669e-39	6.71836e-38	0.984078	-0.476869	0.59962	-13.0257	0.392309
CMTM7	7.03494e-60	8.83023e-59	0.152408	-0.971295	0.154649	-16.3207	0.392232
MARCKSL1	2.42579e-57	2.8772e-56	0.203505	-1.15312	0.181689	-15.96	0.391993
INPP1	3.99352e-73	6.51594e-72	0.0809549	-1.13783	0.0872865	-18.0876	0.39197
DDX21	2.82005e-46	2.62892e-45	0.396388	-0.747941	0.315465	-14.2823	0.391683
KIAA1217	2.43564e-56	2.8258e-55	0.202416	-0.889962	0.184535	-15.8154	0.391596
MGAT4B	2.98291e-64	4.11693e-63	0.1282	-1.02165	0.13093	-16.9242	0.391459
TSPAN14	6.50986e-56	7.48188e-55	0.202155	-0.862079	0.189279	-15.7534	0.39142
RNASE1	1.2347e-70	1.93344e-69	0.0978474	-1.58286	0.106736	-17.7687	0.391408
HM13	8.47629e-45	7.65122e-44	0.474568	-0.721571	0.354364	-14.0432	0.391318
PPM1K	2.78993e-59	3.4503e-58	0.174104	-0.989693	0.165085	-16.2364	0.391316
COMTD1	7.22474e-56	8.29752e-55	0.193504	-1.04781	0.198292	-15.7468	0.391194
CNP	1.67717e-69	2.58067e-68	0.105698	-1.06173	0.105313	-17.6218	0.391095
LAP3	8.87045e-44	7.78655e-43	0.549975	-0.680242	0.388046	-13.8759	0.390831
TRIM21	7.55705e-89	1.60623e-87	0.0423866	-1.29936	0.044592	-19.9842	0.390772
EPHA2	4.96472e-48	4.80234e-47	0.392582	-0.76105	0.297438	-14.5611	0.390765
OSER1	8.14119e-60	1.01867e-58	0.17147	-0.973996	0.163188	-16.3118	0.390755
MGAT1	7.2403e-54	8.00399e-53	0.232181	-0.899587	0.219639	-15.4527	0.390607
HIF1A	1.83323e-71	2.90492e-70	0.100015	-1.26443	0.101992	-17.8754	0.390476
ZNF185	3.13018e-87	6.4219e-86	0.0484572	-1.38158	0.0498102	-19.7975	0.390444
PNPT1	1.67744e-62	2.22094e-61	0.174623	-0.983013	0.148008	-16.6853	0.390007
CLIP4	5.92907e-81	1.10674e-79	0.071599	-1.34976	0.0687856	-19.0554	0.390002
POLR1D	3.32179e-44	2.95001e-43	0.524096	-0.640437	0.40038	-13.9461	0.389923
IER3	8.97915e-52	9.4542e-51	0.369417	-0.905483	0.248102	-15.1388	0.38988
AKAP13	1.47398e-48	1.45041e-47	0.355789	-0.765711	0.297438	-14.6439	0.389851
PPP1R14B	2.23116e-58	2.70883e-57	0.193	-1.03769	0.187856	-16.1083	0.38964
MISP	7.0653e-46	6.52159e-45	0.485078	-0.734565	0.371917	-14.2182	0.38945
SP140L	1.13428e-73	1.86793e-72	0.100207	-1.08855	0.0944023	-18.1568	0.389447
CCDC6	2.10246e-57	2.49928e-56	0.202204	-0.935606	0.194972	-15.969	0.389337
GPR87	3.93367e-103	1.04861e-101	0.0175101	-1.53657	0.0203985	-21.5638	0.389297
RAB1B	1.87582e-49	1.87948e-48	0.338079	-0.737176	0.286528	-14.7834	0.389255
AQP5	2.12671e-49	2.12951e-48	0.758562	-0.935201	0.305977	-14.7749	0.389208
RNF19B	8.228e-68	1.22696e-66	0.131135	-1.03698	0.122391	-17.4002	0.389207
ARL5B	6.42872e-78	1.13993e-76	0.0782371	-1.22767	0.0811195	-18.6861	0.389201
S100A9	6.30813e-65	8.8832e-64	0.228231	-1.35835	0.142789	-17.0155	0.389192
DAPK3	1.58591e-73	2.60092e-72	0.0960711	-1.32547	0.0996205	-18.1384	0.389108
GBP2	3.07616e-89	6.59101e-88	0.0488163	-1.60229	0.0498102	-20.029	0.389051
CMC2	2.34407e-64	3.24928e-63	0.145941	-0.989337	0.144687	-16.9384	0.388774
GCNT3	3.46035e-95	8.07634e-94	0.0297837	-1.74327	0.0388994	-20.7	0.38861
H2AFX	1.8119e-72	2.92343e-71	0.10915	-1.26006	0.105313	-18.004	0.388457
SMIM37	8.00408e-48	7.71421e-47	0.429275	-0.748773	0.339184	-14.5284	0.388186
HMOX1	2.99617e-98	7.37068e-97	0.0360227	-1.78849	0.0317837	-21.0372	0.388119
IRF9	2.91902e-79	5.29979e-78	0.0908168	-1.151	0.0777989	-18.8504	0.388045
AHR	5.34047e-57	6.28284e-56	0.224423	-0.981372	0.210152	-15.9107	0.388004
ADRB2	5.11678e-95	1.18902e-93	0.0407317	-1.5252	0.038425	-20.6812	0.387982
TAP2	1.70774e-69	2.62517e-68	0.121876	-1.1146	0.122391	-17.6207	0.387981
TKT	1.94551e-47	1.86379e-46	0.484282	-0.772024	0.364801	-14.4675	0.387924
IER2	5.9204e-43	5.07403e-42	1.12099	-0.564266	0.52704	-13.7391	0.387546
LAD1	4.31642e-92	9.50388e-91	0.0406269	-1.46758	0.0474383	-20.3536	0.387538
PHF11	2.00935e-52	2.15118e-51	0.33026	-0.767704	0.259962	-15.237	0.387526
CFL2	1.37843e-81	2.59735e-80	0.0718723	-1.37144	0.0759013	-19.1316	0.387446
ARHGEF5	3.93021e-86	7.89061e-85	0.0671291	-1.21576	0.0597723	-19.6696	0.387425
GTPBP2	5.2966e-93	1.18254e-91	0.0425668	-1.50852	0.0450664	-20.4561	0.38726
RCC2	7.9854e-65	1.12056e-63	0.159579	-1.08036	0.153226	-17.0016	0.387214
TXNRD1	3.14996e-47	2.99961e-46	0.522274	-0.778781	0.377135	-14.4343	0.387165
UBE2V1	1.17413e-97	2.84019e-96	0.0333235	-1.37666	0.0341556	-20.9723	0.387145
RAB10	6.77534e-46	6.2612e-45	0.568697	-0.657901	0.426471	-14.2211	0.387129
STX3	6.9508e-73	1.13179e-71	0.115753	-1.11821	0.108634	-18.057	0.387082
USP15	1.49762e-68	2.25648e-67	0.14409	-1.02664	0.130455	-17.4975	0.386688
SPHK1	3.7153e-114	1.15225e-112	0.00690974	-1.85281	0.00806452	-22.7082	0.386653
S100A8	1.34632e-85	2.69282e-84	0.103139	-2.05203	0.06926	-19.607	0.386617
TRAFD1	1.3448e-76	2.34289e-75	0.0926006	-1.15413	0.097723	-18.5231	0.386218
ZDHHC7	2.17069e-65	3.08956e-64	0.167675	-1.00875	0.154175	-17.0778	0.386042
MAPK6	1.12458e-59	1.40274e-58	0.225912	-0.923463	0.197818	-16.292	0.385941
LURAP1L	1.1623e-82	2.23232e-81	0.0689955	-1.51389	0.0796964	-19.2601	0.385938
CARD16	4.70658e-75	7.95626e-74	0.11798	-1.23884	0.105787	-18.3307	0.38584
FAM3C	2.08619e-48	2.044e-47	0.485149	-0.742924	0.382827	-14.6203	0.385792
EHF	5.51681e-54	6.11994e-53	0.320773	-0.844284	0.267552	-15.4702	0.38559
TRIM25	1.20717e-64	1.68507e-63	0.185756	-0.993309	0.165085	-16.9774	0.385193
EEF1D	7.34562e-43	6.26855e-42	1.56475	-0.350753	0.695446	-13.7235	0.385149
TXNDC17	1.73608e-46	1.62602e-45	0.648241	-0.642249	0.461101	-14.3161	0.385134
CEACAM1	8.43366e-108	2.40934e-106	0.0200622	-1.79457	0.0208729	-22.0556	0.385084
CORO1C	5.46169e-82	1.03896e-80	0.0724724	-1.43653	0.085389	-19.1798	0.384947
APOL1	3.40543e-63	4.6005e-62	0.203094	-1.03023	0.178843	-16.7802	0.384929
SH3GL1	4.06156e-73	6.62018e-72	0.113162	-1.16718	0.121442	-18.0866	0.3848
WBP1	4.36504e-89	9.30254e-88	0.0632935	-1.31734	0.0607211	-20.0116	0.38474
EHD4	1.19797e-57	1.43155e-56	0.264675	-0.889741	0.235294	-16.004	0.384403
HDAC9	6.78684e-96	1.58635e-94	0.0418861	-1.72533	0.0469639	-20.7784	0.384379
ARHGDIA	4.27445e-49	4.24542e-48	0.477711	-0.716367	0.388994	-14.7278	0.384227
SLC25A25	1.45861e-70	2.27958e-69	0.143197	-1.18088	0.138046	-17.7594	0.384213
NUTM2A-AS1	1.55788e-85	3.11205e-84	0.0620512	-1.41657	0.0754269	-19.5996	0.384165
METRNL	3.4014e-99	8.48541e-98	0.0343601	-1.61452	0.0398482	-21.1401	0.384151
PNRC2	3.04494e-55	3.44007e-54	0.295453	-0.845147	0.272296	-15.6555	0.384039
SLC4A11	2.62442e-60	3.3203e-59	0.263581	-0.992822	0.215844	-16.3808	0.383875
TARS	5.87034e-78	1.04208e-76	0.102958	-1.24358	0.103416	-18.6909	0.383677
JUNB	1.47031e-46	1.38115e-45	1.02102	-0.654489	0.494307	-14.3276	0.383586
GPI	3.98993e-59	4.91907e-58	0.255315	-0.992189	0.235769	-16.2144	0.383566
RC3H1	4.11983e-63	5.55619e-62	0.218686	-0.967542	0.18833	-16.7689	0.383357
R3HDM4	2.37694e-63	3.22749e-62	0.198791	-0.952549	0.191176	-16.8016	0.383258
B4GALT5	3.3044e-52	3.50936e-51	0.423555	-0.801807	0.341556	-15.2044	0.383244
PHACTR4	2.7698e-55	3.13367e-54	0.335218	-0.824375	0.277514	-15.6616	0.383238
KPNB1	1.81332e-50	1.86371e-49	0.476434	-0.717692	0.371917	-14.9399	0.383189
PHLDA1	2.47952e-114	7.73502e-113	0.0145037	-1.99474	0.0142315	-22.726	0.383183
NMI	5.72897e-59	7.05761e-58	0.266029	-0.869512	0.228653	-16.1922	0.383086
BHLHE40	1.31723e-60	1.68658e-59	0.246468	-1.074	0.226281	-16.4226	0.383051
OXSR1	4.19085e-87	8.56491e-86	0.0770588	-1.22747	0.0716319	-19.7828	0.383034
VDAC2	9.70277e-47	9.14677e-46	0.810384	-0.617124	0.537002	-14.3565	0.382965
SRPK1	4.13098e-71	6.50069e-70	0.132525	-1.10358	0.139469	-17.83	0.382952
MPRIP	1.79008e-67	2.64709e-66	0.185254	-1.04515	0.160342	-17.3556	0.3829
PTAFR	4.17868e-96	9.81036e-95	0.0515254	-1.4112	0.0488615	-20.8017	0.382713
ARL8B	4.11648e-64	5.6521e-63	0.196011	-1.00431	0.187856	-16.9052	0.382693
TNFAIP3	6.83467e-54	7.56082e-53	0.444791	-0.932383	0.313567	-15.4564	0.382672
PRSS8	1.79119e-72	2.89294e-71	0.124454	-1.42506	0.141366	-18.0047	0.382648
ARF5	2.84843e-50	2.91443e-49	0.511719	-0.702696	0.402751	-14.9097	0.382566
FNBP4	1.15089e-58	1.408e-57	0.289618	-0.897882	0.240512	-16.1492	0.382449
TRIM69	4.09422e-80	7.5278e-79	0.107078	-1.21332	0.097723	-18.954	0.382325
PSME2	2.03948e-45	1.86205e-44	1.20413	-0.442453	0.654175	-14.1438	0.38226
RALA	2.59531e-64	3.5913e-63	0.191377	-1.02194	0.191651	-16.9324	0.382246
FAM129B	8.20997e-53	8.86688e-52	0.436788	-0.866719	0.346774	-15.2954	0.382147
SRGN	9.58243e-94	2.16979e-92	0.0827567	-2.10634	0.0607211	-20.5394	0.382072
STEAP4	6.88464e-61	8.86494e-60	0.291382	-1.11634	0.237666	-16.4619	0.381964
NT5C2	1.09703e-65	1.57405e-64	0.200601	-0.961452	0.178368	-17.1176	0.381963
ACADVL	8.07282e-48	7.77106e-47	0.766134	-0.614509	0.500474	-14.5278	0.381682
ARF1	3.05244e-47	2.90849e-46	0.858293	-0.520901	0.551708	-14.4364	0.381629
PKP3	1.28801e-63	1.75639e-62	0.223318	-0.980122	0.203036	-16.8379	0.3816
CEMIP2	5.20811e-97	1.24471e-95	0.0470045	-1.46798	0.0517078	-20.9013	0.381145
NFKB2	4.44446e-95	1.03429e-93	0.058229	-1.72041	0.0574004	-20.688	0.381111
TAPBP	2.42688e-49	2.42703e-48	0.656129	-0.648342	0.462524	-14.766	0.381074
GPCPD1	2.25878e-66	3.27934e-65	0.196566	-1.0886	0.18833	-17.2094	0.380741
CHL1	2.66077e-66	3.85244e-65	0.194894	-1.03557	0.189279	-17.1999	0.380701
COTL1	4.2355e-103	1.12718e-101	0.0456141	-1.7296	0.0388994	-21.5603	0.380689
RNF10	1.1707e-60	1.50258e-59	0.25199	-0.888722	0.23814	-16.4298	0.380634
STK17B	9.04805e-79	1.63162e-77	0.0981509	-1.32747	0.118596	-18.7904	0.380241
RNF145	1.58881e-50	1.63612e-49	0.618505	-0.687592	0.439753	-14.9487	0.380086
PAM16	2.35422e-112	7.17564e-111	0.022598	-1.49155	0.022296	-22.5251	0.380069
APOBEC3A	1.34208e-127	4.85128e-126	0.000957534	-2.38675	0.000474383	-24.0303	0.380054
HYPK	1.59173e-100	4.04685e-99	0.0531668	-1.39448	0.0450664	-21.2842	0.379993
HP1BP3	1.88126e-66	2.74124e-65	0.203354	-0.995858	0.189279	-17.22	0.379959
SLC2A1	7.55656e-66	1.08914e-64	0.227957	-0.957289	0.191651	-17.1393	0.379958
N4BP1	8.89183e-75	1.49678e-73	0.135684	-1.1009	0.136148	-18.2961	0.379791
GJB3	1.02798e-100	2.62612e-99	0.0419823	-1.62233	0.0483871	-21.3046	0.379705
VASP	8.74681e-71	1.37102e-69	0.159413	-1.09082	0.163662	-17.7881	0.379682
PIGX	1.59113e-69	2.45065e-68	0.175139	-1.213	0.172201	-17.6247	0.379621
STAT6	3.34498e-57	3.95566e-56	0.379949	-0.769204	0.285579	-15.94	0.379495
RPL22L1	2.99259e-52	3.18457e-51	0.5857	-0.774074	0.414611	-15.2109	0.37948
ABCC1	4.14451e-97	9.94994e-96	0.0537804	-1.3712	0.0559772	-20.9122	0.379391
RAB24	9.67953e-106	2.69758e-104	0.0365254	-1.82253	0.0374763	-21.84	0.379264
LDHA	1.76889e-57	2.10432e-56	0.41114	-0.951045	0.314042	-15.9797	0.379194
CKAP4	4.70422e-67	6.91151e-66	0.198259	-1.09664	0.197818	-17.3	0.379193
SMAD3	9.09171e-65	1.27468e-63	0.240931	-0.951041	0.211575	-16.994	0.378959
CAP1	6.8285e-54	7.55924e-53	0.475207	-0.778144	0.379032	-15.4564	0.378958
LSR	3.16727e-53	3.45345e-52	0.533895	-0.765094	0.403226	-15.3573	0.378929
ARID5B	2.18309e-78	3.90142e-77	0.11534	-1.39111	0.128558	-18.7436	0.378872
PLP2	6.87821e-58	8.24402e-57	0.401472	-0.888789	0.296964	-16.0385	0.378798
HES4	1.47004e-55	1.67505e-54	0.576692	-0.798474	0.339184	-15.7018	0.378671
SYNGR2	1.80593e-53	1.98403e-52	0.567618	-0.715148	0.393264	-15.3936	0.378564
VSIR	1.09978e-67	1.63542e-66	0.220767	-1.03414	0.19592	-17.3835	0.378222
NMT1	4.84225e-72	7.75004e-71	0.169921	-1.09996	0.162239	-17.9495	0.378021
ADH7	5.90369e-76	1.01412e-74	0.197031	-1.32758	0.146584	-18.4433	0.377783
PDP1	2.9457e-87	6.05122e-86	0.0912204	-1.33718	0.0920304	-19.8005	0.377673
AREG	1.08374e-88	2.27913e-87	0.0998242	-1.76362	0.0910816	-19.9662	0.377665
BIRC3	9.0095e-81	1.67585e-79	0.1229	-1.48467	0.122865	-19.0335	0.377556
SERINC2	2.62501e-58	3.18457e-57	0.396792	-0.915389	0.320209	-16.0982	0.377453
KRT80	2.9733e-76	5.14629e-75	0.170118	-1.26186	0.146584	-18.4803	0.376846
TNFSF10	3.17774e-53	3.4625e-52	0.726206	-0.775699	0.458729	-15.357	0.376837
PPP2R2A	3.81369e-59	4.70906e-58	0.37125	-0.820084	0.303131	-16.2172	0.376658
CAPN2	5.63784e-49	5.58216e-48	1.515	-0.33914	0.767078	-14.7091	0.376658
ARPC5	7.68016e-60	9.62495e-59	0.353799	-0.862042	0.297913	-16.3153	0.376443
MAP7D1	1.18731e-88	2.48059e-87	0.0947601	-1.32307	0.091556	-19.9616	0.376372
TRIP6	2.04805e-71	3.23888e-70	0.187676	-1.12995	0.185009	-17.8692	0.376279
KRT13	8.86301e-128	3.21834e-126	0.0130008	-2.80216	0.00664137	-24.0475	0.376158
SLK	2.138e-61	2.78219e-60	0.345779	-0.824582	0.275142	-16.5326	0.376081
NUB1	1.66931e-72	2.69882e-71	0.19237	-1.0696	0.171252	-18.0086	0.375961
POLR2A	3.35389e-62	4.42219e-61	0.32467	-0.922465	0.263283	-16.6438	0.375879
BCL3	2.73462e-81	5.1225e-80	0.114437	-1.4488	0.13093	-19.0958	0.375825
ARPC2	4.62831e-51	4.81592e-50	1.05233	-0.487998	0.61148	-15.0306	0.375763
UPP1	2.01815e-117	6.44717e-116	0.028087	-1.96738	0.0232448	-23.0363	0.375698
SOCS3	3.47929e-74	5.7895e-73	0.217619	-1.28176	0.172201	-18.2216	0.375485
TACC1	1.00841e-93	2.28015e-92	0.0740827	-1.41394	0.079222	-20.5369	0.375423
SCEL	1.55275e-127	5.58745e-126	0.0110773	-2.00852	0.00806452	-24.0242	0.375359
SERPINB3	1.88804e-65	2.68965e-64	0.742874	-1.35194	0.261385	-17.086	0.375333
AGRN	5.03451e-61	6.49838e-60	0.398194	-0.83202	0.291746	-16.4809	0.375107
MTUS1	2.52812e-67	3.72465e-66	0.244625	-1.00226	0.225332	-17.3357	0.375033
LAMP3	5.83243e-97	1.39184e-95	0.075603	-1.37341	0.06926	-20.8959	0.374899
AMOTL2	7.75644e-91	1.68684e-89	0.0933681	-1.3438	0.0906072	-20.2115	0.374693
YWHAB	5.27447e-52	5.58303e-51	1.01643	-0.490289	0.599146	-15.1738	0.374564
CLTB	8.49821e-55	9.54014e-54	0.686286	-0.722636	0.474858	-15.5901	0.374358
ZC3HAV1	1.62764e-67	2.41136e-66	0.265318	-1.05033	0.231499	-17.361	0.374288
ITGB1	4.18616e-56	4.84264e-55	0.581927	-0.76288	0.431214	-15.7813	0.373995
IL32	5.05264e-110	1.48059e-108	0.0469345	-2.42056	0.044592	-22.286	0.373985
PDLIM2	2.74121e-86	5.53136e-85	0.103075	-1.51895	0.120968	-19.6878	0.373696
ENO1	6.64661e-55	7.4826e-54	0.741501	-0.709869	0.491461	-15.6058	0.373542
TAF1D	1.42773e-63	1.9436e-62	0.352937	-0.934307	0.279412	-16.8318	0.373464
YBX1	9.59955e-52	1.01008e-50	1.54682	-0.36409	0.709677	-15.1344	0.373423
BSCL2	2.94349e-110	8.67323e-109	0.0431919	-1.68028	0.0426945	-22.3102	0.373134
MCUB	8.77926e-94	1.99359e-92	0.0865022	-1.44653	0.0887097	-20.5436	0.372992
PGAM1	7.18154e-60	9.00715e-59	0.44098	-0.839657	0.364326	-16.3194	0.372992
MAP3K8	1.0452e-81	1.97178e-80	0.155325	-1.22869	0.138046	-19.146	0.372715
AHNAK2	1.01841e-77	1.80182e-76	0.209345	-1.08324	0.157021	-18.6615	0.37254
TPI1	5.33648e-53	5.79488e-52	1.1636	-0.470945	0.647059	-15.3234	0.372479
TES	3.00417e-64	4.14268e-63	0.332211	-0.95003	0.293169	-16.9238	0.372455
BTG3	2.25192e-71	3.55425e-70	0.246371	-1.10894	0.212049	-17.8639	0.372346
RPP21	1.37681e-96	3.27577e-95	0.07721	-1.31616	0.079222	-20.8549	0.372314
TRIM38	6.44016e-82	1.22217e-80	0.144655	-1.17019	0.139943	-19.1712	0.372242
RHOA	9.60021e-53	1.03543e-51	1.42711	-0.359792	0.718691	-15.2852	0.372123
CAST	1.11408e-52	1.19997e-51	1.40044	-0.412699	0.718691	-15.2755	0.372022
PABPC4	1.18014e-66	1.72752e-65	0.297415	-0.957994	0.263283	-17.2469	0.371997
MAFB	7.98771e-120	2.65829e-118	0.0237246	-2.39119	0.0289374	-23.2748	0.371857
TNIP1	2.01374e-76	3.49684e-75	0.180329	-1.17729	0.177419	-18.5013	0.371674
FLII	1.49851e-64	2.08809e-63	0.355353	-0.882768	0.289848	-16.9647	0.371407
GRB2	1.22812e-71	1.948e-70	0.240032	-1.02485	0.213472	-17.8977	0.371311
UBAP1	2.38756e-92	5.27147e-91	0.0999114	-1.38165	0.100569	-20.3826	0.371175
AFF4	1.8408e-65	2.62706e-64	0.343021	-0.856479	0.281784	-17.0874	0.370924
RELB	2.62203e-113	8.03803e-112	0.0338895	-1.87027	0.0436433	-22.6222	0.370763
CHD2	2.21309e-68	3.32506e-67	0.304734	-0.985501	0.254269	-17.4752	0.370561
CRB3	1.52636e-73	2.50584e-72	0.221005	-1.14172	0.212998	-18.1405	0.370543
ARF6	6.59517e-59	8.11842e-58	0.59225	-0.74813	0.439279	-16.1835	0.370512
THOC3	1.85696e-105	5.14815e-104	0.0547143	-1.49697	0.0621442	-21.8102	0.370414
LRRFIP2	7.95207e-76	1.36305e-74	0.201218	-1.11312	0.193074	-18.4272	0.370263
KIAA1551	6.05178e-95	1.40016e-93	0.105707	-1.4299	0.0939279	-20.6731	0.370112
PHLDA3	9.89814e-99	2.45391e-97	0.0934823	-1.44426	0.0811195	-21.0897	0.36994
RCC1	6.06044e-99	1.50717e-97	0.0791787	-1.44325	0.0830171	-21.1129	0.369704
MED15	2.00465e-80	3.70291e-79	0.183807	-1.10395	0.163188	-18.9915	0.369191
MYC	1.74163e-127	6.253e-126	0.017676	-2.00286	0.0208729	-24.0195	0.368993
CD99	3.28184e-62	4.33077e-61	0.507195	-0.852045	0.393264	-16.6451	0.368608
DNAJB1	1.6132e-60	2.06057e-59	0.625444	-0.858867	0.43833	-16.4103	0.368458
ARNTL2	1.79527e-118	5.84048e-117	0.0319919	-1.71453	0.038425	-23.1409	0.36841
CHMP4B	5.04861e-58	6.06937e-57	0.855907	-0.6047	0.55408	-16.0577	0.368401
PRSS23	4.16124e-61	5.37991e-60	1.11404	-0.727459	0.391366	-16.4924	0.368369
ATXN2L	4.84128e-76	8.34323e-75	0.240827	-1.07	0.20019	-18.454	0.368155
NGRN	1.63525e-78	2.93552e-77	0.21217	-1.03807	0.182638	-18.759	0.368091
MT1X	3.05712e-72	4.90277e-71	0.33681	-1.32514	0.259488	-17.975	0.367951
RBCK1	4.86709e-66	7.03411e-65	0.381861	-0.913479	0.324478	-17.1649	0.367942
STK17A	1.1002e-72	1.78235e-71	0.281572	-1.03976	0.242884	-18.0316	0.367492
SDC1	6.20377e-80	1.13541e-78	0.18816	-1.31119	0.193548	-18.9321	0.367402
SNX9	2.11006e-93	4.73753e-92	0.117073	-1.3463	0.112903	-20.501	0.367238
AKIRIN2	8.4568e-103	2.24309e-101	0.0815827	-1.42809	0.079222	-21.5283	0.367093
RDH10	9.92563e-69	1.50404e-67	0.416243	-1.15919	0.31926	-17.5209	0.367087
TMEM165	1.03796e-64	1.45396e-63	0.477358	-0.870186	0.379032	-16.9863	0.366795
PPA1	1.30904e-62	1.74476e-61	0.605648	-0.795038	0.441176	-16.7001	0.36669
CLDN23	1.29489e-88	2.7018e-87	0.154302	-1.32855	0.138994	-19.9573	0.366652
SBDS	6.15674e-71	9.67896e-70	0.318454	-1.01071	0.279412	-17.8077	0.366599
SLFN5	9.98015e-66	1.43457e-64	0.464614	-0.882098	0.349146	-17.1231	0.366528
ELL2	3.07111e-85	6.10432e-84	0.150971	-1.26509	0.158444	-19.565	0.3664
TRIM29	1.14632e-67	1.70303e-66	0.446667	-0.894909	0.316414	-17.3811	0.366387
ITPR3	1.0096e-97	2.45335e-96	0.0962697	-1.36718	0.101044	-20.9795	0.366289
CLDN1	9.01131e-77	1.57165e-75	0.2752	-1.24776	0.22296	-18.5446	0.366149
CAPG	7.89264e-76	1.35432e-74	0.280538	-1.13648	0.233871	-18.4276	0.36598
PLK2	2.63429e-107	7.43243e-106	0.0643688	-1.74728	0.0744782	-22.004	0.365624
DBNDD2	3.7232e-145	1.65325e-143	0.000491072	-1.8057	0.000948767	-25.6549	0.365369
CNN2	3.84348e-77	6.76257e-76	0.243303	-1.12553	0.229127	-18.5904	0.36522
FUT3	5.48079e-98	1.33797e-96	0.0966729	-1.5217	0.109583	-21.0085	0.364809
MIR22HG	8.0874e-92	1.7709e-90	0.123104	-1.3924	0.136148	-20.3228	0.36464
OVCA2	8.00192e-147	3.61356e-145	0	-1.8358	0	-25.804	0.364587
TRIB1	4.70851e-90	1.0212e-88	0.1493	-1.37799	0.145161	-20.1223	0.364506
MYO5B	1.04428e-77	1.84556e-76	0.258127	-1.06391	0.221537	-18.6602	0.364501
PRRC2C	2.38229e-64	3.2994e-63	0.576589	-0.752715	0.415085	-16.9375	0.364459
ANKLE2	4.48315e-79	8.11191e-78	0.240573	-1.12222	0.209677	-18.8276	0.364426
CEACAM6	1.23496e-66	1.8061e-65	0.90187	-0.879068	0.389943	-17.2443	0.363866
BAG1	4.97795e-63	6.70782e-62	0.869326	-0.663165	0.526091	-16.7577	0.363231
ETS2	1.07029e-73	1.76437e-72	0.350338	-1.12124	0.290797	-18.16	0.363139
NLRC5	8.9132e-114	2.74827e-112	0.069752	-1.60025	0.0626186	-22.6697	0.362955
HIST1H2BK	4.01467e-147	1.8233e-145	0.00135393	-1.9595	0.00237192	-25.8306	0.36294
SNX6	1.33432e-72	2.15943e-71	0.349287	-0.948122	0.29981	-18.021	0.362782
ATP5MD	4.81067e-60	6.0622e-59	1.66647	-0.331546	0.777514	-16.3439	0.362703
F2RL1	1.70094e-110	5.02124e-109	0.0754902	-1.56981	0.0740038	-22.3347	0.362409
BCL10	4.38965e-107	1.23631e-105	0.0824595	-1.51518	0.085389	-21.9809	0.36208
IFIT5	3.76234e-104	1.02522e-102	0.0940855	-1.33667	0.0910816	-21.6721	0.36205
FLNA	5.66657e-133	2.16621e-131	0.0321472	-2.21819	0.0260911	-24.539	0.36184
TICAM1	6.99813e-114	2.16616e-112	0.0739513	-1.61781	0.066888	-22.6804	0.361493
CFL1	2.45727e-61	3.19506e-60	1.64117	-0.380493	0.736243	-16.5242	0.36137
NABP1	6.70914e-128	2.44179e-126	0.0327142	-1.98403	0.0388994	-24.0591	0.360687
ITPKC	1.22558e-97	2.96015e-96	0.135185	-1.49212	0.128083	-20.9703	0.360587
AAK1	1.09659e-94	2.52247e-93	0.155564	-1.28413	0.139469	-20.6444	0.359982
PTPRK	7.05425e-89	1.50136e-87	0.193285	-1.18145	0.178368	-19.9876	0.359393
HERC5	1.1839e-132	4.51497e-131	0.0365422	-1.94036	0.0313093	-24.509	0.359344
HIST1H2BC	2.05674e-122	7.00567e-121	0.0576547	-1.89322	0.0540797	-23.5291	0.359135
PLAU	1.42031e-152	6.86097e-151	0.00134742	-2.71304	0.00189753	-26.3114	0.358884
ALS2CL	6.51545e-104	1.76039e-102	0.120243	-1.39607	0.109583	-21.6468	0.358339
FABP5	6.028e-87	1.22723e-85	0.274362	-1.43612	0.212049	-19.7644	0.358311
OPTN	3.40608e-75	5.78235e-74	0.393513	-0.993429	0.329696	-18.3483	0.358
TRAPPC5	2.69154e-128	9.90897e-127	0.0447328	-1.71396	0.0426945	-24.0969	0.357998
CYR61	2.39411e-96	5.654e-95	0.196186	-1.57707	0.151803	-20.8284	0.357943
CDC37	2.21774e-71	3.50377e-70	0.529637	-0.841732	0.40038	-17.8648	0.357912
PEA15	9.42448e-103	2.49561e-101	0.116646	-1.46425	0.120019	-21.5233	0.357839
TSPAN3	2.57048e-65	3.65205e-64	1.38395	-0.433227	0.697818	-17.068	0.357513
TOP1	8.89495e-74	1.46937e-72	0.465334	-0.931565	0.369545	-18.1702	0.357195
GABRP	3.26965e-89	6.9868e-88	0.239118	-1.52322	0.214421	-20.026	0.357033
GSR	8.55497e-106	2.39254e-104	0.113157	-1.37304	0.108634	-21.8456	0.356997
GRINA	2.98061e-77	5.25596e-76	0.38759	-1.00402	0.315939	-18.604	0.356953
EIF2S2	4.74284e-68	7.09912e-67	0.828354	-0.688006	0.538899	-17.4317	0.356788
SPNS2	5.38055e-138	2.16594e-136	0.0275747	-2.34103	0.0303605	-25.0051	0.356562
ADAR	3.97489e-72	6.36821e-71	0.569663	-0.809679	0.407495	-17.9605	0.356483
A4GALT	8.60935e-95	1.98613e-93	0.17816	-1.46208	0.175996	-20.6561	0.356413
SOD2	5.35942e-80	9.83136e-79	0.342801	-1.16602	0.28463	-18.9398	0.356398
PIM1	5.60725e-128	2.04543e-126	0.0492645	-1.86389	0.0493359	-24.0665	0.356317
FAM49B	6.88801e-100	1.74012e-98	0.142199	-1.29073	0.138994	-21.2154	0.356038
ABLIM1	9.41791e-83	1.81099e-81	0.313924	-1.08356	0.271822	-19.271	0.355289
DIAPH1	5.20401e-96	1.21996e-94	0.173943	-1.23607	0.163188	-20.7912	0.35519
ETV6	9.34076e-88	1.92877e-86	0.240343	-1.1715	0.223435	-19.8583	0.355129
GNG10	1.71145e-141	7.19849e-140	0.021016	-1.72503	0.0256167	-25.3246	0.354993
NCOA7	6.60648e-81	1.23174e-79	0.39878	-1.1747	0.29981	-19.0497	0.354948
PLEC	8.90469e-72	1.41666e-70	0.710068	-0.791546	0.461101	-17.9156	0.354609
RNASEK	4.06739e-137	1.6291e-135	0.0391472	-1.69572	0.0336812	-24.9242	0.354294
REEP3	3.50933e-83	6.7891e-82	0.329849	-1.11017	0.291746	-19.322	0.353751
MAFK	2.08919e-105	5.77189e-104	0.126339	-1.48458	0.128083	-21.8048	0.353701
CCNL1	2.95061e-76	5.11257e-75	0.550439	-0.894681	0.404649	-18.4807	0.352795
SHISA5	5.34725e-83	1.03197e-81	0.354207	-1.02098	0.294592	-19.3002	0.352708
BTG1	2.65892e-75	4.52356e-74	0.623518	-0.952307	0.42315	-18.3618	0.352652
TCIRG1	1.04481e-94	2.40684e-93	0.205903	-1.22528	0.190228	-20.6467	0.352517
KLK10	4.09329e-123	1.40931e-121	0.0754345	-2.05108	0.0777989	-23.5975	0.352036
RPL36A	2.14488e-70	3.34556e-69	1.32524	-0.498118	0.673624	-17.7377	0.351929
IFRD1	1.59135e-104	4.35873e-103	0.153002	-1.44463	0.141841	-21.7117	0.351531
IDO1	2.95636e-152	1.42379e-150	0.0138782	-2.45871	0.0166034	-26.2836	0.35138
GRAMD2B	9.05451e-82	1.71017e-80	0.439646	-1.13326	0.3463	-19.1535	0.351219
PARP10	7.94887e-104	2.14042e-102	0.166593	-1.35416	0.144687	-21.6376	0.351136
SMG1	6.35539e-92	1.39547e-90	0.256473	-1.10448	0.212524	-20.3346	0.351082
CRYBG1	3.68865e-114	1.14621e-112	0.105288	-1.4446	0.105313	-22.7085	0.351011
MYD88	8.29088e-118	2.66461e-116	0.0995319	-1.51755	0.0944023	-23.0748	0.350481
KRT6A	1.48331e-161	8.21021e-160	0.00567716	-3.03038	0.00426945	-27.0849	0.350421
SRPX2	1.01526e-141	4.30431e-140	0.0349862	-1.81275	0.0355787	-25.3452	0.350332
CSRNP1	1.20088e-119	3.97987e-118	0.0839621	-1.69992	0.0939279	-23.2573	0.349929
MTHFD2	2.92872e-132	1.11424e-130	0.0526094	-1.91191	0.0588235	-24.4721	0.349675
DDIT3	2.36987e-112	7.20956e-111	0.129674	-2.09576	0.123814	-22.5248	0.349655
JUND	1.59759e-75	2.72669e-74	0.795984	-0.770678	0.497154	-18.3894	0.34964
KRT4	2.21e-139	9.01012e-138	0.0738291	-2.76308	0.0483871	-25.1322	0.34871
MAL2	4.84386e-77	8.4946e-76	0.808268	-0.784715	0.51945	-18.578	0.348577
GADD45A	5.76219e-102	1.50407e-100	0.210194	-1.54287	0.179791	-21.4392	0.348441
CAV2	3.82273e-111	1.14116e-109	0.118785	-1.71849	0.143738	-22.4013	0.347991
LPCAT4	1.88093e-100	4.7745e-99	0.21627	-1.39087	0.201139	-21.2763	0.34733
LYN	9.84841e-99	2.44538e-97	0.225708	-1.23518	0.20778	-21.0899	0.346591
RIOK3	4.11445e-97	9.89267e-96	0.252454	-1.17753	0.219639	-20.9126	0.346221
TMOD3	2.05051e-89	4.40528e-88	0.368752	-1.06514	0.309772	-20.0492	0.345751
IFI30	5.09234e-162	2.84832e-160	0.0113974	-2.38984	0.012334	-27.1243	0.345543
TENT5A	7.72115e-104	2.08262e-102	0.213291	-1.37403	0.184061	-21.639	0.345459
NECTIN2	5.33863e-95	1.23876e-93	0.292488	-1.16789	0.254744	-20.6791	0.345134
ITGA6	4.99394e-158	2.62734e-156	0.0211683	-2.11549	0.0189753	-26.7838	0.345115
FOSL1	1.6457e-169	1.0129e-167	0.00142267	-2.48199	0.0028463	-27.7521	0.345114
EPS8L1	1.1426e-88	2.39345e-87	0.436289	-1.18677	0.343454	-19.9636	0.344943
TJP1	2.27073e-96	5.37058e-95	0.284414	-1.19697	0.243833	-20.8309	0.344838
PDLIM5	4.94211e-88	1.02314e-86	0.433274	-1.08834	0.355787	-19.8903	0.344328
MXD1	3.0253e-142	1.29293e-140	0.0531478	-2.00422	0.0512334	-25.3928	0.344302
BRD2	6.77781e-83	1.30647e-81	0.60499	-0.900303	0.433112	-19.288	0.344251
SPINT1	3.23644e-89	6.92511e-88	0.436163	-1.06443	0.337287	-20.0265	0.344141
AL138963.3	4.38423e-173	2.8181e-171	0	-2.68182	0	-28.0467	0.343857
ASPH	1.14927e-94	2.63985e-93	0.314639	-1.17377	0.279412	-20.6421	0.343718
NAPA	1.15297e-98	2.85397e-97	0.252814	-1.18867	0.234345	-21.0824	0.343459
WASL	2.07432e-97	4.99499e-96	0.281741	-1.19431	0.252846	-20.9452	0.343118
FOSB	1.64972e-103	4.41985e-102	0.304768	-1.64036	0.225332	-21.6039	0.342771
LDLR	9.15648e-102	2.37725e-100	0.268708	-1.34681	0.231499	-21.4176	0.342355
PGD	2.05972e-98	5.08267e-97	0.289135	-1.21374	0.257116	-21.055	0.342027
TPM3	3.18981e-85	6.33234e-84	0.624771	-0.857828	0.453985	-19.5631	0.341956
CYTOR	7.23568e-158	3.79421e-156	0.0264861	-2.11907	0.0265655	-26.7699	0.341853
NFKBIZ	2.4861e-99	6.22149e-98	0.289567	-1.26016	0.247154	-21.1549	0.341707
SP110	9.93333e-120	3.2989e-118	0.132355	-1.56172	0.129981	-23.2654	0.341322
PARP12	6.98761e-118	2.25029e-116	0.150647	-1.37984	0.13093	-23.0822	0.341271
STAT2	2.13245e-105	5.88121e-104	0.248055	-1.23006	0.199715	-21.8039	0.340775
ERRFI1	4.34952e-120	1.45358e-118	0.145895	-1.81003	0.136622	-23.3008	0.340664
EPS8L2	1.09411e-97	2.65064e-96	0.32606	-1.1918	0.267552	-20.9757	0.340467
CSTA	2.86978e-117	9.14943e-116	0.18043	-1.86511	0.157495	-23.021	0.340079
IFI35	4.16542e-104	1.13312e-102	0.252199	-1.31087	0.226755	-21.6674	0.340034
C8orf59	6.68689e-92	1.46624e-90	0.449405	-0.978931	0.352941	-20.3321	0.339917
CLEC2B	4.16954e-154	2.08359e-152	0.0390256	-2.30231	0.0398482	-26.445	0.339889
MYH9	3.33028e-93	7.45618e-92	0.425663	-1.09239	0.336338	-20.4788	0.339754
LGALS9	3.97679e-111	1.18493e-109	0.194674	-1.47426	0.192125	-22.3995	0.33927
LMNA	1.64195e-84	3.23939e-83	0.99124	-0.736986	0.574953	-19.4794	0.33923
SMCHD1	1.00214e-117	3.20786e-116	0.165412	-1.40317	0.143264	-23.0666	0.339167
FHL2	4.94173e-140	2.03031e-138	0.0655828	-2.16257	0.0825427	-25.1917	0.33794
RAB5IF	5.7826e-95	1.33983e-93	0.447608	-1.07525	0.358634	-20.6753	0.337866
COX16	1.67845e-111	5.01991e-110	0.198194	-1.31167	0.193074	-22.4379	0.337555
APOL6	2.87717e-101	7.4456e-100	0.347712	-1.16624	0.278937	-21.3642	0.336714
MDK	2.59237e-91	5.65321e-90	0.904571	-0.92272	0.428843	-20.2655	0.336645
AC015912.3	4.52575e-165	2.64267e-163	0.0293468	-2.2174	0.0260911	-27.3817	0.336524
SNHG8	5.85324e-100	1.48341e-98	0.363768	-1.27406	0.301233	-21.223	0.336474
DDX60	7.94395e-132	3.00082e-130	0.118438	-1.56276	0.102941	-24.4314	0.336332
NTS	2.30128e-136	9.08038e-135	0.173195	-1.99268	0.0972486	-24.8547	0.335565
GLUD1	1.08472e-102	2.86285e-101	0.338135	-1.25232	0.290797	-21.5168	0.335548
ANXA3	3.87023e-119	1.26684e-117	0.197801	-1.61538	0.167457	-23.207	0.335385
SNHG7	2.67785e-126	9.52848e-125	0.136518	-1.71093	0.136622	-23.9056	0.335081
RBMS1	2.13767e-106	5.98886e-105	0.305418	-1.26692	0.255693	-21.9089	0.334638
ZNFX1	1.39879e-111	4.19926e-110	0.261612	-1.27631	0.212524	-22.446	0.334207
KLF4	1.41794e-105	3.94475e-104	0.359478	-1.36157	0.287476	-21.8225	0.333814
SERPINB5	9.84559e-167	5.87822e-165	0.0341503	-2.25903	0.0317837	-27.521	0.333121
PABPC1	1.79367e-89	3.8587e-88	1.32271	-0.536761	0.663188	-20.0559	0.332753
LINC00342	1.02738e-136	4.08415e-135	0.129381	-1.76958	0.108159	-24.8871	0.332338
DTX3L	8.15765e-123	2.79658e-121	0.172642	-1.43757	0.16888	-23.5683	0.331648
KRT15	4.354e-144	1.90679e-142	0.0943491	-2.19056	0.0967742	-25.5591	0.331044
SP100	5.59109e-108	1.6059e-106	0.327639	-1.20195	0.279886	-22.0742	0.331039
LAMB3	1.19141e-115	3.76086e-114	0.293774	-1.48163	0.224858	-22.8589	0.330579
VCL	1.46475e-141	6.17712e-140	0.09663	-1.75652	0.100569	-25.3308	0.330572
AKR1C2	6.65894e-147	3.01563e-145	0.091686	-2.13596	0.0891841	-25.8111	0.330512
RAP2B	2.07535e-165	1.22078e-163	0.0369735	-2.19273	0.0441176	-27.4102	0.329648
IL18	3.16009e-131	1.18251e-129	0.161643	-1.64252	0.139469	-24.3749	0.329643
MALL	6.25496e-141	2.6034e-139	0.106876	-2.09532	0.116224	-25.2735	0.329349
SERTAD1	3.10077e-123	1.07222e-121	0.195211	-1.55954	0.190702	-23.6092	0.328713
TMBIM1	3.8386e-118	1.2412e-116	0.236086	-1.45561	0.225332	-23.1081	0.328653
CD68	2.98199e-158	1.57403e-156	0.0710798	-2.01289	0.0621442	-26.803	0.328103
GALNT5	1.91746e-150	9.07012e-149	0.0756157	-2.20693	0.0901328	-26.1246	0.327877
ATF3	8.30685e-108	2.37737e-106	0.444662	-1.4461	0.333017	-22.0563	0.327845
HIST1H2AC	1.02226e-122	3.49696e-121	0.227527	-1.59074	0.202087	-23.5587	0.327499
ITGB8	8.62606e-112	2.59939e-110	0.398623	-1.35037	0.286528	-22.4675	0.327206
RHOD	4.27623e-124	1.49163e-122	0.213756	-1.60678	0.203036	-23.6928	0.326981
PLS3	5.58875e-164	3.20469e-162	0.0470322	-2.2329	0.0559772	-27.2899	0.326901
C19orf33	2.92916e-96	6.88699e-95	1.35963	-0.606472	0.652751	-20.8187	0.326594
ST14	5.5325e-101	1.4179e-99	0.714298	-0.923075	0.488615	-21.3336	0.326126
USP18	5.8312e-148	2.69435e-146	0.100676	-1.80079	0.0991461	-25.9051	0.325789
RPS4Y1	5.9084e-192	4.61695e-190	0.0153659	-2.88516	0.00759013	-29.5536	0.325264
ZFP36	5.24522e-102	1.37297e-100	0.861364	-0.94148	0.482922	-21.4436	0.325093
ATF4	1.44347e-105	4.00876e-104	0.53592	-1.0833	0.399431	-21.8217	0.324952
EMP3	6.48283e-156	3.28072e-154	0.0957777	-2.24524	0.0825427	-26.6017	0.32483
DSG2	9.56845e-140	3.9211e-138	0.14552	-1.67614	0.137097	-25.1655	0.324118
ADM	9.06475e-192	7.04884e-190	0.00938089	-2.67127	0.0113852	-29.5391	0.323996
VPS37B	3.09059e-125	1.08518e-123	0.230567	-1.4077	0.211101	-23.8033	0.323962
ASS1	6.25052e-124	2.17554e-122	0.298161	-1.74229	0.247154	-23.6768	0.323824
SAMD9L	1.65038e-145	7.36937e-144	0.12396	-1.76148	0.117173	-25.6866	0.323402
CXCL16	4.17907e-126	1.48041e-124	0.238187	-1.47937	0.217742	-23.887	0.323233
UPK1B	4.54758e-157	2.34605e-155	0.119349	-2.32567	0.0920304	-26.7013	0.32263
RAB11FIP1	1.71587e-101	4.44758e-100	1.03662	-0.767258	0.5963	-21.3883	0.322328
MYADM	1.36273e-127	4.91478e-126	0.240476	-1.53962	0.218691	-24.0296	0.322067
CMPK2	2.75501e-153	1.35131e-151	0.106888	-1.83636	0.0972486	-26.3736	0.321921
ZYX	8.98548e-176	5.91891e-174	0.0390412	-2.19322	0.044592	-28.2663	0.321815
HELZ2	1.2215e-156	6.24099e-155	0.0975315	-1.8234	0.0877609	-26.6643	0.321559
ZFP36L2	1.55751e-109	4.54729e-108	0.585685	-1.13072	0.413188	-22.2355	0.321333
IFIH1	2.16565e-159	1.16238e-157	0.0940859	-1.8399	0.0839658	-26.9005	0.320355
PARP9	3.65928e-125	1.28203e-123	0.310171	-1.26803	0.24241	-23.7962	0.319271
LMTK3	4.44577e-162	2.49542e-160	0.0884926	-2.14875	0.0868121	-27.1293	0.319257
CD55	5.04613e-110	1.48059e-108	0.91954	-0.958471	0.446869	-22.286	0.319053
CTSB	6.87407e-107	1.93262e-105	0.8973	-0.8521	0.54981	-21.9605	0.318873
POLD4	2.32587e-142	9.99372e-141	0.151637	-1.74561	0.164611	-25.4032	0.318854
TUBA1C	1.36802e-133	5.2803e-132	0.229937	-1.55203	0.206831	-24.5968	0.31815
GBP3	6.76655e-163	3.83863e-161	0.0962096	-1.77837	0.0820683	-27.1985	0.317748
MCL1	2.1989e-113	6.7539e-112	0.590095	-1.02613	0.428368	-22.6299	0.317289
TMSB4X	4.69903e-104	1.2761e-102	2.9496	-0.367995	0.888046	-21.6619	0.317222
HIST2H2AA4	7.30687e-208	6.81163e-206	0.00206787	-2.626	0.00189753	-30.7667	0.316755
C1orf116	6.12593e-146	2.7508e-144	0.16854	-1.79173	0.15797	-25.7251	0.316382
MACC1	2.54332e-126	9.07003e-125	0.362511	-1.39267	0.276565	-23.9078	0.316044
C19orf66	1.95541e-142	8.44747e-141	0.19552	-1.53317	0.170304	-25.41	0.315455
HSH2D	9.21957e-173	5.90238e-171	0.066312	-1.89835	0.0702087	-28.0202	0.314978
TMPRSS4	6.7361e-134	2.60631e-132	0.268062	-1.49785	0.247628	-24.6255	0.314463
WASHC1	1.05156e-153	5.20587e-152	0.150019	-1.66179	0.128558	-26.41	0.313565
IRF1	3.90579e-123	1.34767e-121	0.46515	-1.29581	0.342979	-23.5994	0.313544
DDX60L	8.42341e-184	6.21655e-182	0.0586888	-2.21234	0.0488615	-28.9121	0.313497
SERPINB2	3.06101e-178	2.09423e-176	0.0906182	-2.74213	0.0687856	-28.4663	0.313181
PPP1R15A	1.4838e-114	4.63789e-113	0.803742	-1.05179	0.509488	-22.7485	0.313151
KRT23	8.44676e-135	3.28414e-133	0.351463	-1.67752	0.25759	-24.7095	0.31231
S100A16	4.41636e-138	1.78683e-136	0.335988	-1.765	0.249526	-25.013	0.312304
SLC6A14	2.34996e-160	1.27852e-158	0.136578	-2.0843	0.13425	-26.9828	0.310776
PML	1.13732e-157	5.92484e-156	0.139563	-1.70648	0.133776	-26.7531	0.310723
HLA-DRB5	2.40914e-184	1.78624e-182	0.114889	-1.89499	0.0498102	-28.9553	0.310674
S100A14	8.79333e-136	3.44409e-134	0.461599	-1.56326	0.276565	-24.8008	0.310401
FGFBP1	7.28803e-175	4.76142e-173	0.105132	-2.65482	0.091556	-28.1922	0.310264
WARS	9.0801e-137	3.61865e-135	0.326981	-1.58662	0.259013	-24.892	0.310033
UBE2L6	2.19881e-134	8.52829e-133	0.317318	-1.38161	0.279886	-24.6709	0.309821
ADAM9	5.69395e-150	2.66963e-148	0.171364	-1.67455	0.179317	-26.0829	0.309784
CEACAM5	3.64975e-177	2.47577e-175	0.105774	-2.6255	0.0863378	-28.3792	0.309542
OASL	3.94636e-214	4.05864e-212	0.0090394	-2.72491	0.00711575	-31.2318	0.309482
MYOF	3.08474e-147	1.40497e-145	0.220991	-1.55334	0.190702	-25.8408	0.309464
MAFF	1.48875e-160	8.12745e-159	0.129168	-2.02289	0.141366	-26.9997	0.309209
CCL2	3.93041e-218	4.44359e-216	0.0039535	-3.47492	0.00237192	-31.5251	0.309131
CD44	9.5045e-161	5.20657e-159	0.155662	-1.91107	0.138994	-27.0163	0.308823
RPL17	1.99802e-118	6.48685e-117	0.948643	-0.799624	0.574478	-23.1363	0.308414
TXN	2.9341e-114	9.13526e-113	2.93389	-0.328342	0.900854	-22.7186	0.308365
NAMPT	8.82603e-141	3.66395e-139	0.26539	-1.50505	0.236717	-25.2599	0.308179
FXYD5	1.58867e-193	1.26625e-191	0.0537792	-2.17578	0.0479127	-29.6755	0.306916
SPATS2L	3.98279e-122	1.35372e-120	0.850353	-0.905335	0.540323	-23.501	0.306308
JUP	4.13405e-145	1.83058e-143	0.271991	-1.58055	0.247154	-25.6509	0.30554
DUSP5	1.67466e-171	1.05517e-169	0.12444	-2.30608	0.123814	-27.9167	0.304931
MET	1.62468e-159	8.77933e-158	0.161395	-1.86574	0.170304	-26.9112	0.304894
GBP1	1.97075e-147	9.00164e-146	0.314703	-1.61577	0.22723	-25.8581	0.304592
KRT19	7.63141e-119	2.49287e-117	3.12682	-0.402915	0.888994	-23.1778	0.30444
SDCBP2	5.91162e-177	3.9931e-175	0.110882	-2.14886	0.115275	-28.3622	0.30203
MRPS24	1.59235e-223	1.923e-221	0.00858916	-2.41257	0.00901328	-31.9162	0.301919
LRRC8A	1.3263e-181	9.48093e-180	0.093196	-2.27172	0.104839	-28.7367	0.301572
PLAUR	3.18592e-203	2.8059e-201	0.0507721	-2.67642	0.0521822	-30.4179	0.300149
CXCL8	4.49255e-165	2.63293e-163	0.286721	-1.98872	0.176471	-27.382	0.299107
DDX58	1.592e-213	1.58613e-211	0.036076	-2.40731	0.0317837	-31.1871	0.299004
GDF15	1.49168e-153	7.33915e-152	0.372181	-1.7934	0.242884	-26.3968	0.298929
TOMM5	6.43607e-160	3.48971e-158	0.221419	-1.57279	0.198292	-26.9455	0.29867
PNPLA2	2.79484e-157	1.44651e-155	0.259975	-1.60619	0.240038	-26.7195	0.297121
ADGRF1	7.7775e-161	4.27521e-159	0.273194	-1.68053	0.221063	-27.0237	0.295867
IGFBP3	1.99848e-196	1.63373e-194	0.0945435	-2.64138	0.0887097	-29.8995	0.295541
F3	8.76075e-153	4.2839e-151	0.458585	-1.66676	0.3074	-26.3297	0.29502
TRIM22	1.67039e-174	1.08685e-172	0.175456	-1.74695	0.1537	-28.1628	0.294756
PRSS22	8.3252e-162	4.62411e-160	0.268726	-1.68878	0.230076	-27.1062	0.294561
PPL	8.77274e-164	5.01241e-162	0.256463	-1.62896	0.219165	-27.2734	0.293485
PARP14	3.53695e-152	1.69827e-150	0.406554	-1.38214	0.3074	-26.2767	0.29317
GLRX	3.28216e-154	1.64531e-152	0.375269	-1.51055	0.309298	-26.454	0.293102
HERC6	1.30596e-195	1.05677e-193	0.0959313	-2.01908	0.091556	-29.8367	0.293052
SLC38A2	5.63717e-176	3.74425e-174	0.161795	-1.92274	0.168406	-28.2827	0.292943
TYMP	7.91171e-136	3.10642e-134	1.21392	-0.81058	0.643738	-24.805	0.292461
MUC4	5.69118e-136	2.24008e-134	1.40263	-0.717916	0.685484	-24.8183	0.292193
EIF2AK2	8.32421e-163	4.70554e-161	0.310722	-1.46829	0.25	-27.1909	0.290275
MUC16	4.01958e-141	1.68179e-139	1.07798	-0.937314	0.604839	-25.2909	0.289944
ANKRD36C	3.00627e-187	2.27123e-185	0.190666	-1.9319	0.134725	-29.185	0.289121
TAP1	2.26122e-173	1.45936e-171	0.247454	-1.68194	0.21537	-28.0703	0.28731
MIR4435-2HG	8.31012e-208	7.70183e-206	0.0864108	-2.36031	0.0863378	-30.7625	0.286962
PPIA	1.39707e-141	5.90733e-140	1.7998	-0.529946	0.79222	-25.3326	0.28683
SNHG12	3.3397e-216	3.6716e-214	0.0646794	-2.52909	0.0654649	-31.3841	0.286258
NFKBIA	6.89299e-176	4.55938e-174	0.250609	-1.96304	0.217268	-28.2756	0.285642
IFI16	3.6933e-178	2.51602e-176	0.220958	-1.73321	0.206357	-28.4597	0.28534
RPLP0	3.85863e-143	1.67148e-141	2.82118	-0.405599	0.87666	-25.4737	0.285084
C15orf48	1.20857e-199	1.03026e-197	0.162359	-2.40374	0.120493	-30.146	0.284909
STAT1	7.92887e-162	4.41937e-160	0.470699	-1.33304	0.337287	-27.108	0.283954
ACTN4	6.15031e-152	2.92663e-150	0.78788	-1.00708	0.516603	-26.2557	0.283475
ALDH1A3	4.74031e-185	3.53108e-183	0.213321	-2.15096	0.198292	-29.0113	0.283362
JUN	8.06158e-154	4.01592e-152	1.02103	-1.10459	0.473435	-26.4201	0.283254
EPSTI1	5.05152e-214	5.12906e-212	0.101962	-2.11301	0.0944023	-31.2239	0.279717
SGK1	2.06816e-231	2.65875e-229	0.0601125	-2.58653	0.0645161	-32.4796	0.277426
TACSTD2	1.93508e-155	9.73097e-154	2.12141	-0.61132	0.799336	-26.5606	0.276501
ZFAS1	8.9871e-166	5.34565e-164	0.645993	-1.26151	0.444023	-27.4406	0.276017
KRT17	1.70941e-231	2.21543e-229	0.121486	-3.2324	0.0721063	-32.4855	0.275992
GNG5	1.05027e-157	5.48931e-156	1.60959	-0.549951	0.771347	-26.756	0.274958
HLA-E	1.97322e-159	1.06267e-157	1.2686	-0.78822	0.676471	-26.904	0.274697
HMGA1	1.78942e-194	1.44067e-192	0.253909	-1.95668	0.236717	-29.7489	0.272406
PMAIP1	5.48238e-243	8.0921e-241	0.0564799	-2.69965	0.0578748	-33.2895	0.271503
IFI44	3.54768e-208	3.32668e-206	0.183164	-1.89926	0.159393	-30.7902	0.2711
RPS12	1.31292e-164	7.55567e-163	3.45459	-0.384149	0.91129	-27.3429	0.26924
YWHAZ	1.10301e-167	6.66025e-166	1.21755	-0.767013	0.66556	-27.6003	0.269217
MT-ND5	1.97589e-165	1.16658e-163	2.92794	-0.470079	0.932163	-27.4119	0.268648
SH3BGRL3	2.17834e-171	1.36712e-169	1.1431	-1.01229	0.622865	-27.9073	0.267054
JPT1	3.7627e-183	2.76411e-181	0.5913	-1.31764	0.422201	-28.8603	0.265241
SLC3A2	1.6493e-215	1.77645e-213	0.179762	-2.20594	0.173624	-31.3332	0.264645
RPL30	7.52637e-172	4.77999e-170	3.01307	-0.340407	0.899431	-27.9453	0.264195
KLF5	3.46494e-182	2.4993e-180	0.700321	-1.25321	0.484345	-28.7834	0.263797
RPL37	1.40068e-172	8.93127e-171	2.89434	-0.363214	0.901328	-28.0053	0.263683
SOX4	2.00409e-197	1.6553e-195	0.3943	-1.87364	0.296015	-29.9762	0.263483
MUC20	2.68246e-217	3.01134e-215	0.207356	-2.05766	0.180266	-31.4642	0.263429
LMO7	1.6165e-182	1.1713e-180	0.836681	-1.21874	0.536528	-28.8098	0.261794
EMP1	1.68349e-264	3.15724e-262	0.0489226	-3.15957	0.0517078	-34.7444	0.260525
IL1RN	4.95957e-287	1.16265e-284	0.0130425	-3.20295	0.00759013	-36.2057	0.260078
OAS2	2.43296e-234	3.28677e-232	0.142801	-2.16643	0.13093	-32.6865	0.259838
GPRC5A	1.83946e-227	2.29084e-225	0.19552	-2.55067	0.182163	-32.1987	0.259002
TM4SF1	4.66523e-221	5.50878e-219	0.28558	-2.30373	0.210152	-31.7379	0.258551
GAPDH	4.1382e-182	2.97149e-180	2.24839	-0.619103	0.809298	-28.7772	0.257482
GADD45B	1.04176e-214	1.08541e-212	0.313766	-1.93276	0.249051	-31.2744	0.256247
TNFRSF12A	1.23084e-226	1.52099e-224	0.226302	-2.23963	0.191651	-32.1397	0.25603
RND3	1.35528e-209	1.29369e-207	0.363524	-1.73201	0.294118	-30.8959	0.255918
PLSCR1	1.16801e-208	1.10829e-206	0.415415	-1.60611	0.319734	-30.8262	0.254222
CDKN1A	8.81507e-215	9.30603e-213	0.36419	-1.80406	0.275617	-31.2797	0.253814
LY6E	4.46512e-199	3.76605e-197	1.13965	-1.08875	0.531309	-30.1027	0.25051
GABARAP	4.14676e-203	3.61222e-201	0.76285	-1.18178	0.510436	-30.4092	0.248859
S100A2	4.84003e-255	8.38641e-253	0.178345	-3.17135	0.13093	-34.1123	0.248714
SFN	2.01357e-253	3.37876e-251	0.149168	-2.74116	0.138994	-34.003	0.24849
PSMA6	9.64819e-273	1.94686e-270	0.0832522	-2.41841	0.0768501	-35.2859	0.246662
IFIT2	8.06724e-301	2.25614e-298	0.0276584	-3.5193	0.0265655	-37.0716	0.245188
ACTG1	3.00204e-203	2.65864e-201	2.72936	-0.536254	0.883302	-30.4198	0.243396
OAS3	2.70157e-294	7.05996e-292	0.0462345	-2.78278	0.0512334	-36.6644	0.241546
PHLDA2	3.36701e-259	5.96372e-257	0.174801	-2.43645	0.165085	-34.3916	0.240846
SAMD9	1.01115e-273	2.09334e-271	0.133794	-2.41384	0.124288	-35.3498	0.237164
TPM4	1.82756e-252	2.94274e-250	0.25331	-2.24873	0.237192	-33.9381	0.236235
CLDN4	2.47663e-218	2.81999e-216	1.68123	-0.853829	0.767552	-31.5398	0.234701
RSAD2	3.23413e-298	8.73818e-296	0.123611	-2.74315	0.101992	-36.9097	0.226948
OAS1	4.84409e-287	1.15253e-284	0.155223	-2.49293	0.15038	-36.2063	0.226319
IFITM2	0	0	0.0860999	-2.87976	0.0811195	-37.9642	0.221974
KRT7	1.85325e-253	3.14284e-251	0.952024	-1.50537	0.432163	-34.0054	0.221093
KLF6	2.46377e-250	3.85049e-248	0.810074	-1.40001	0.487192	-33.7934	0.220742
MIF	2.25649e-250	3.56145e-248	1.18059	-1.00148	0.651803	-33.796	0.216787
ACTB	4.44355e-249	6.87715e-247	3.27043	-0.497991	0.939279	-33.7078	0.215513
RNF213	5.5997e-278	1.23979e-275	0.356544	-1.94884	0.289848	-35.6257	0.215147
BST2	8.17323e-286	1.88825e-283	0.359561	-2.0172	0.265655	-36.1282	0.213575
IRF7	0	0	0.135169	-2.61185	0.126186	-38.0583	0.212243
IFIT1	0	0	0.135131	-2.87454	0.110531	-38.4257	0.212065
MTRNR2L8	0	0	0.000787276	-3.61929	0.000948767	-41.214	0.21177
XAF1	0	0	0.130321	-2.52501	0.105787	-38.5784	0.209617
SAT1	1.81531e-261	3.36486e-259	3.38551	-0.446245	0.929791	-34.543	0.208451
IFI44L	0	0	0.0599079	-3.0622	0.050759	-40.1221	0.207799
MX2	0	0	0.0474997	-3.22699	0.0460152	-40.4971	0.205831
ANXA1	8.61772e-268	1.65512e-265	2.91092	-0.584302	0.90797	-34.9616	0.204954
RPS26	7.50844e-274	1.5749e-271	2.22777	-0.5725	0.855313	-35.3582	0.201756
MT2A	2.72417e-275	5.79014e-273	1.73659	-1.02833	0.736717	-35.4518	0.201648
ISG20	2.20265e-288	5.48632e-286	0.646455	-1.58793	0.439753	-36.2915	0.200864
MT-ND6	1.17014e-299	3.21606e-297	0.517874	-1.92157	0.357211	-36.9994	0.198345
RPS21	3.41893e-304	9.90931e-302	2.17335	-0.633278	0.842979	-37.2803	0.185592
SQSTM1	2.60163e-308	7.82501e-306	1.07011	-1.29224	0.622391	-37.5337	0.185264
IFIT3	0	0	0.0561423	-3.52927	0.0540797	-42.685	0.183008
NME2	0	0	0.0312407	-3.66009	0.0374763	-43.7374	0.176791
ATP6V0C	0	0	0.00763227	-3.78898	0.00616698	-45.098	0.170059
ALDOA	0	0	0.0962483	-3.24175	0.101992	-43.2259	0.16987
MX1	0	0	0.152047	-3.0648	0.132353	-44.3815	0.154054
S100A10	0	0	1.3143	-1.418	0.626186	-41.9994	0.147546
TMSB10	0	0	3.02282	-0.664949	0.909867	-44.8374	0.121571
IFI6	0	0	0.526817	-2.49904	0.366224	-48.3732	0.101009
IFITM1	0	0	0.0461319	-4.40981	0.0488615	-51.7961	0.0953069
IFITM3	0	0	0.881928	-1.99311	0.536053	-48.5852	0.0935408
IFI27	0	0	1.96416	-1.25582	0.748102	-49.6242	0.081646
ISG15	0	0	0.339024	-3.08235	0.259488	-51.6466	0.0770999
MT-ND4L	0	0	0.951842	-2.16981	0.549336	-53.3895	0.0519689
MT-ATP8	0	0	0.0427937	-4.55069	0.0294118	-56.9195	0.0469155
MTRNR2L12	0	0	0.0011002	-5.34724	0.00142315	-57.3967	0.0459108
TAOK1	0	0	0.226151	-3.33132	0.194023	-56.5503	0.0354699

## Sheet: BALF_glm_mixed_pid
geneID	covModelLR	covModelPval	covModelFDR	x_Intercept_	cl_HC	nGene
HES4	9.81929	0.00172691	0.00604184	0.35618	-0.313109	0.000158013
ISG15	20.4259	6.19855e-06	0.000248717	2.07271	-1.59757	4.40664e-05
AGRN	8.706	0.00317164	0.00864625	0.455783	-0.239814	4.38574e-05
TTLL10	3.30547	0.0690495	0.0803804	0.493957	0.163384	2.32201e-05
CFAP74	1.60512	0.205179	0.216653	0.374384	0.090694	1.18786e-05
PARK7	7.84796	0.00508782	0.0114688	0.863732	0.297419	0.000204251
ERRFI1	5.70267	0.0169392	0.025558	0.310589	-0.303014	6.32084e-05
ENO1	7.12097	0.00761876	0.014781	0.54452	-0.245102	0.000148433
PGD	4.85563	0.027556	0.0367291	0.311011	-0.167996	0.00010556
C1orf158	4.30522	0.0379955	0.0475963	0.276192	0.140353	3.54713e-05
[truncated: 1,321 more rows]
