# Supplementary material for: Metabolic Regulation of SARS-CoV-2 Infection
Source: Research Square preprint supplement (doi:10.21203/rs.3.rs-770724/v1), 2021-08-12
Supplement: Supplementary file 3 [file bd42e7bde9586533973763a9.xlsx]

## Sheet: Cl01
geneID	pval	fdr	meanExp	logR	expT	rsZ	auc	subMinAuc	subMinIdx	maxLogR
TAOK1	2.27842e-162	1.55594e-158	4.45862	1.5424	0.986226	27.1284	0.917604	0.78639	4	0.624491
SQSTM1	1.07704e-143	4.90341e-140	4.21049	1.44331	0.928375	25.4965	0.898343	0.812383	4	0.743062
GPX4	8.45207e-112	8.2456e-109	4.23379	0.814527	0.936639	22.4376	0.852242	0.803895	5	0.525021
PPP1R15A	1.14615e-114	1.30451e-111	3.09179	1.62618	0.848485	22.7294	0.848314	0.803076	4	1.19005
SLC3A2	1.26185e-130	3.44688e-127	2.61358	2.35368	0.790634	24.2896	0.84084	0.783001	4	1.32787
DDIT3	6.94737e-164	9.48872e-160	2.93409	3.13104	0.749311	27.2566	0.839695	0.812942	4	2.21902
NUPR1	1.03478e-105	7.85165e-103	3.57168	1.48104	0.85124	21.8052	0.836728	0.80458	2	0.923359
GADD45B	3.33023e-109	2.84276e-106	2.65921	1.96839	0.785124	22.1702	0.820023	0.760571	4	1.19348
ATF3	2.77109e-105	1.99197e-102	2.79826	2.03085	0.77686	21.7601	0.815998	0.783632	2	1.53665
NFKBIA	3.76939e-107	3.02837e-104	2.65435	2.18969	0.754821	21.9563	0.810731	0.767131	4	1.4701
SOX4	3.84199e-94	2.38518e-91	2.70086	1.68866	0.796143	20.5501	0.801985	0.688939	4	0.757798
SNHG12	7.82988e-125	1.52772e-121	2.19088	2.6862	0.69697	23.7351	0.800413	0.753451	4	1.69395
MTRNR2L12	4.69353e-86	2.78714e-83	4.57778	1.23475	0.895317	19.6254	0.793832	0.61882	4	0.262023
ZFAS1	3.0104e-76	1.17474e-73	2.53039	1.4348	0.76584	18.4422	0.781285	0.722121	4	0.882996
HIST1H4C	1.21361e-80	5.52514e-78	2.55976	1.8789	0.732782	18.9815	0.779677	0.7324	2	1.21164
TNFRSF12A	4.79029e-85	2.72608e-82	2.42468	1.92294	0.705234	19.507	0.773012	0.676914	4	0.75802
BTG1	2.17861e-74	7.25741e-72	2.19948	1.56684	0.732782	18.2093	0.772206	0.729022	4	1.08429
GDF15	8.44066e-83	4.43394e-80	2.54566	1.7791	0.730028	19.2407	0.771822	0.67358	4	0.806897
UBXN11	1.12564e-74	3.84349e-72	2.0724	1.29343	0.757576	18.2454	0.7703	0.677078	2	0.312531
TYMP	3.92779e-65	1.19213e-62	2.73581	0.884503	0.831956	17.0026	0.765222	0.666174	2	0.281448
CLDN3	2.99728e-64	8.89931e-62	2.90816	1.17705	0.790634	16.8831	0.761641	0.726715	5	0.848398
ELF3	1.0512e-59	2.76102e-57	3.32483	0.532928	0.895317	16.2537	0.755093	0.705458	4	0.427182
CIRBP	4.11577e-58	1.02206e-55	2.47524	0.846611	0.782369	16.0274	0.750492	0.706233	5	0.566629
H3F3B	3.03951e-56	7.2831e-54	3.9821	0.385342	0.964187	15.7577	0.747504	0.663578	4	0.260927
HES1	7.95561e-67	2.52692e-64	2.25379	1.86157	0.677686	17.2296	0.746585	0.684477	6	1.32935
CFAP157	1.17227e-59	3.02092e-57	2.64138	1.0323	0.804408	16.247	0.743788	0.527087	2	-0.0556196
JUN	1.33443e-49	2.84776e-47	2.63878	0.980243	0.779614	14.7596	0.724828	0.597893	3	0.25996
BBC3	2.37751e-102	1.6236e-99	1.35621	2.77075	0.506887	21.4481	0.716394	0.696949	4	2.20819
SNHG8	4.03473e-51	9.18438e-49	1.77767	1.68836	0.625344	14.9937	0.716068	0.669547	3	1.09706
RRAD	9.55269e-49	1.97683e-46	2.18905	1.20913	0.683196	14.6262	0.714615	0.607402	2	0.358919
FOXJ1	1.00403e-46	1.98739e-44	2.30096	0.937797	0.768595	14.306	0.713516	0.549081	2	0.0149276
HIST1H4H	2.75169e-131	9.39566e-128	1.18911	2.82324	0.471074	24.3521	0.709296	0.679821	4	2.0006
PLCG2	7.39012e-123	1.26168e-119	1.34189	2.96646	0.46832	23.5431	0.706406	0.677008	2	2.26416
JUNB	1.59172e-42	2.89862e-40	2.27455	1.12591	0.694215	13.6168	0.704708	0.617575	3	0.477008
ISG15	8.77193e-40	1.46106e-37	3.45277	0.850056	0.834711	13.1477	0.701771	0.564496	4	0.204279
ZFP36L2	2.20602e-41	3.76623e-39	1.8911	1.23566	0.661157	13.4234	0.70158	0.653537	6	0.923231
HIST1H1C	1.41478e-41	2.47732e-39	1.7724	1.45616	0.62259	13.4562	0.695374	0.66558	6	1.19002
CLDN4	2.07102e-35	2.91609e-33	2.99353	0.567555	0.84022	12.363	0.693617	0.518727	4	0.0493366
RAB24	1.11058e-76	4.46126e-74	1.10553	2.53364	0.473829	18.4961	0.692605	0.670388	3	1.97431
IRF1	1.4613e-38	2.32075e-36	1.87423	1.31643	0.630854	12.9332	0.692447	0.621552	2	0.752325
BRD2	6.98876e-36	1.01545e-33	1.69234	1.17376	0.641873	12.45	0.688301	0.630931	2	0.729357
LRRC23	7.86022e-36	1.13005e-33	2.02321	0.892407	0.69146	12.4407	0.687105	0.526224	2	-0.0944577
IER2	1.41681e-34	1.82555e-32	2.14247	0.962979	0.688705	12.2075	0.685148	0.598093	3	0.378851
IRF7	3.66312e-38	5.75067e-36	1.56428	1.27885	0.61157	12.8624	0.68359	0.597575	4	0.515485
CDKN1A	5.32393e-35	7.27142e-33	1.70727	1.11861	0.636364	12.2869	0.680704	0.567659	4	0.278772
CAPS	9.07013e-29	9.10881e-27	3.9068	0.572726	0.903581	11.067	0.672892	0.422076	5	-0.175455
ZMYND10	3.26652e-30	3.48548e-28	2.14522	0.721821	0.752066	11.3611	0.670848	0.502421	5	-0.106975
ISG20	7.09728e-29	7.23702e-27	2.17215	0.87122	0.69146	11.0889	0.670585	0.546606	4	0.176322
PLXNB2	2.05595e-28	1.95001e-26	1.78012	0.834396	0.677686	10.9934	0.669692	0.586188	2	0.238715
NFKB2	2.34736e-56	5.72505e-54	1.05224	2.28162	0.440771	15.774	0.668169	0.625042	4	1.4376
ODF3B	2.08687e-27	1.91292e-25	2.53096	0.617581	0.831956	10.7823	0.66756	0.445146	2	-0.186136
MAFB	1.20723e-62	3.36496e-60	1.17732	2.22406	0.432507	16.6635	0.666966	0.636637	4	1.48843
WASHC1	1.36129e-33	1.63092e-31	1.19775	1.63883	0.520661	12.022	0.662896	0.581824	2	0.99084
SNHG7	6.17827e-36	9.07342e-34	1.23012	1.82787	0.493113	12.4599	0.661802	0.623705	3	1.29224
MTRNR2L8	1.04038e-33	1.28014e-31	1.54231	1.5498	0.528926	12.0442	0.661587	0.5802	4	0.675188
H2AFJ	1.18198e-24	9.75971e-23	2.18922	0.487034	0.77135	10.1829	0.659308	0.566308	5	0.115445
WDR60	7.10031e-29	7.23702e-27	1.35082	1.16709	0.578512	11.0889	0.658599	0.517275	2	0.140106
RBM39	1.63465e-24	1.32893e-22	1.64625	0.644213	0.672176	10.1513	0.65749	0.628356	2	0.38012
ATF4	9.12973e-26	7.89201e-24	1.54817	1.09454	0.595041	10.4291	0.656145	0.59199	4	0.482453
CCDC40	1.34783e-31	1.53405e-29	1.20257	1.37155	0.517906	11.6363	0.655857	0.5063	2	0.246135
ID2	2.13396e-39	3.51152e-37	1.10891	2.00598	0.451791	13.0803	0.654865	0.612608	6	1.78915
FAM50A	3.33654e-28	3.14279e-26	1.21644	1.48266	0.53168	10.9496	0.654853	0.610816	6	1.39547
MAP1LC3A	2.65139e-25	2.27753e-23	1.38952	1.09101	0.586777	10.3273	0.653713	0.594678	2	0.616899
SYT8	1.2897e-49	2.79599e-47	1.04523	2.25321	0.407713	14.7619	0.653447	0.603185	2	1.69302
NINJ1	8.30079e-39	1.34967e-36	1.05513	2.03308	0.440771	12.9766	0.652384	0.58794	3	1.45547
DNALI1	1.3074e-24	1.06925e-22	1.78685	0.756978	0.661157	10.1731	0.652184	0.418087	2	-0.351678
SCAND1	6.50769e-23	4.77861e-21	1.69913	0.611779	0.680441	9.78534	0.652114	0.604676	5	0.348185
AC008915.2	6.76832e-35	9.06292e-33	0.939991	1.65718	0.454545	12.2675	0.648568	0.553747	2	0.923771
HIST2H2AA4	5.93038e-37	9.10079e-35	1.0103	1.90863	0.435262	12.6454	0.648051	0.558753	2	1.11334
SNHG9	1.18274e-33	1.42955e-31	0.950404	1.84263	0.440771	12.0336	0.645232	0.589066	6	1.6774
LINC02541	3.30047e-47	6.62908e-45	0.80084	2.02719	0.380165	14.3832	0.642889	0.523169	2	0.928292
TRIB3	3.73999e-113	3.92929e-110	0.865692	2.92683	0.311295	22.5759	0.64222	0.62801	4	2.49718
CCDC157	1.226e-28	1.19741e-26	0.993185	1.42505	0.473829	11.0399	0.642027	0.521088	2	0.557285
EDF1	6.49753e-20	4.01553e-18	1.9669	0.355911	0.710744	9.06042	0.641803	0.622069	3	0.178153
ROMO1	8.17844e-20	5.03158e-18	2.26654	0.398537	0.77135	9.03529	0.641629	0.609202	2	0.198168
CCDC114	6.75104e-23	4.90456e-21	1.37124	0.827734	0.600551	9.78163	0.641127	0.455776	2	-0.230451
RELB	1.02754e-41	1.82262e-39	0.852114	2.10337	0.38843	13.4799	0.640928	0.598279	4	1.30536
CHAC1	3.69943e-76	1.40352e-73	0.802218	2.47579	0.327824	18.4311	0.639649	0.607109	4	1.66116
EPB41L4A-AS1	3.37898e-31	3.7828e-29	0.926225	2.01026	0.410468	11.5576	0.63576	0.566931	6	1.6222
KLF10	2.61558e-26	2.31971e-24	1.08813	1.67	0.451791	10.5472	0.635438	0.583885	6	1.48649
IQCN	5.7494e-60	1.53971e-57	0.750893	2.40544	0.330579	16.2907	0.634783	0.597254	2	2.02297
CCDC30	2.01032e-24	1.62467e-22	1.06485	1.22038	0.487603	10.1311	0.634596	0.474699	2	0.101016
KLF6	2.52979e-18	1.45176e-16	1.92688	0.577061	0.702479	8.65202	0.633148	0.516508	4	0.0477651
DMGDH	9.3064e-82	4.38299e-79	0.614887	2.43212	0.30303	19.1159	0.632616	0.586705	2	1.89368
U62317.5	6.88679e-63	1.95958e-60	0.715389	2.37233	0.319559	16.697	0.632208	0.59678	2	1.94337
HRAS	1.25989e-22	8.69072e-21	1.10843	1.60394	0.471074	9.71829	0.631986	0.554589	6	1.28211
AHI1	2.47986e-24	1.9807e-22	1.10163	1.63445	0.454545	10.1106	0.631524	0.542619	2	1.01956
TNFAIP3	1.64165e-20	1.03804e-18	1.30801	1.1892	0.523416	9.20928	0.631247	0.55972	2	0.62081
ATXN2L	5.75336e-22	3.85193e-20	1.09956	1.57191	0.465565	9.56239	0.629468	0.566957	2	1.18508
DNAH11	4.96116e-22	3.33791e-20	1.21485	1.19137	0.487603	9.57771	0.628978	0.429433	2	-0.168456
TIMM44	1.07534e-34	1.41221e-32	0.768622	2.03301	0.369146	12.23	0.628695	0.593633	6	1.70974
PATL2	5.81313e-35	7.86096e-33	0.776572	1.88981	0.371901	12.2798	0.628662	0.494903	2	0.749672
ANKRD37	5.31382e-19	3.11485e-17	1.36365	1.08216	0.53168	8.8283	0.626521	0.491978	2	0.17647
Z93241.1	1.93816e-115	2.40649e-112	0.618511	2.52784	0.269972	22.8074	0.624857	0.614057	4	2.11153
PMAIP1	9.76107e-24	7.4897e-22	1.02436	1.29744	0.446281	9.97545	0.624758	0.519686	4	0.255093
CEP126	8.00022e-18	4.38823e-16	1.27005	0.780122	0.564738	8.51967	0.622834	0.453646	2	-0.217129
GADD45GIP1	9.68694e-16	4.56222e-14	1.5668	0.658608	0.628099	7.94529	0.622763	0.579394	5	0.329179
DRC3	5.82678e-17	2.99181e-15	1.59217	0.628911	0.619835	8.2866	0.622355	0.440268	2	-0.327579
TEKT2	8.35409e-18	4.56401e-16	1.27939	0.862133	0.539945	8.51466	0.621281	0.485029	2	0.0173401
HIST1H2BN	5.79888e-80	2.55487e-77	0.501045	2.18768	0.275482	18.8991	0.620927	0.597734	6	2.05578
C17orf97	1.57291e-18	9.06445e-17	1.03238	1.09382	0.482094	8.70607	0.619353	0.497634	2	0.2692
ANKRD11	8.31807e-17	4.25499e-15	1.1219	1.20007	0.495868	8.24413	0.618247	0.547174	2	0.708196
SPEF1	1.0345e-17	5.58469e-16	1.11614	0.958333	0.504132	8.48985	0.618104	0.468528	2	0.0313699
SERTAD1	3.59767e-18	2.03142e-16	1.05367	1.39262	0.449036	8.61175	0.616026	0.565318	3	0.738101
HEXIM1	5.33057e-21	3.4669e-19	0.979227	1.79577	0.404959	9.32926	0.615912	0.551108	6	1.49142
MARCH10	9.13053e-21	5.8823e-19	0.914818	1.35306	0.415978	9.27204	0.6158	0.447624	2	0.157895
EGR1	1.428e-18	8.26422e-17	1.22309	1.09119	0.473829	8.71703	0.615648	0.469241	6	0.139017
TRAPPC5	4.91749e-24	3.85995e-22	0.764592	1.83196	0.369146	10.0433	0.614777	0.570229	2	1.53122
HIST1H4B	2.81393e-118	3.84327e-115	0.522322	2.3485	0.245179	23.0916	0.61454	0.599871	4	1.77673
HIST3H2A	1.47802e-21	9.75206e-20	0.856845	1.68224	0.38843	9.46428	0.613637	0.574622	2	1.48933
AC004130.1	3.11172e-20	1.94954e-18	0.96802	1.79041	0.38843	9.14038	0.611277	0.515003	2	1.1163
SAT2	4.14455e-15	1.84988e-13	1.05314	1.19396	0.479339	7.76308	0.610877	0.539099	2	0.720125
NCF2	3.9519e-21	2.58254e-19	0.801297	1.52209	0.380165	9.36093	0.610412	0.547044	6	1.14216
TUBA4B	2.48256e-15	1.12647e-13	1.26059	0.944051	0.479339	7.82779	0.60936	0.44339	2	-0.146405
PPP1R10	2.15947e-16	1.07643e-14	0.934514	1.3911	0.435262	8.12927	0.609225	0.522024	2	0.744233
RNF213	1.72328e-13	6.82218e-12	1.50318	0.75026	0.581267	7.27569	0.609219	0.521681	4	0.14008
CFAP45	1.64018e-14	6.95701e-13	1.28329	0.699247	0.550964	7.58675	0.609209	0.427937	2	-0.319732
DDIT4	5.8963e-16	2.82567e-14	1.25566	1.3377	0.454545	8.0066	0.609201	0.566673	3	0.973237
CEBPB	8.55187e-13	3.23857e-11	1.49592	0.669419	0.581267	7.05627	0.608644	0.584646	6	0.570261
CFAP73	2.02927e-14	8.52795e-13	1.28554	0.720375	0.545455	7.5591	0.608634	0.40062	2	-0.412063
ZC3H6	4.43951e-18	2.47489e-16	0.821525	1.40376	0.404959	8.58762	0.608308	0.490158	2	0.525132
TAF1D	1.17107e-14	5.06152e-13	1.08107	1.18663	0.473829	7.6303	0.60811	0.563663	2	0.646721
CEBPG	3.88929e-16	1.89039e-14	0.954906	1.423	0.424242	8.05763	0.606993	0.535165	6	1.02962
CFAP46	1.42953e-15	6.64099e-14	1.0329	1.02852	0.46281	7.89691	0.606818	0.443788	2	0.023681
C6orf99	4.63606e-49	9.74143e-47	0.508535	2.10474	0.261708	14.6754	0.606459	0.569953	6	1.83208
SLC9A1	8.62651e-26	7.55262e-24	0.607153	1.80939	0.319559	10.4345	0.605275	0.575495	3	1.29562
PAXX	1.24808e-15	5.81783e-14	0.920802	1.45699	0.421488	7.91382	0.60512	0.523574	6	1.13278
GADD45G	3.83032e-23	2.84318e-21	0.792409	1.79945	0.336088	9.83882	0.605066	0.563121	6	1.48728
SURF2	1.89356e-14	7.98215e-13	1.03133	1.30714	0.451791	7.5681	0.604917	0.522436	6	0.780056
TPGS1	8.61527e-16	4.07154e-14	0.893505	1.48224	0.418733	7.95981	0.604834	0.545716	2	1.16065
PIM3	5.43678e-14	2.2299e-12	1.11353	1.19022	0.46281	7.42983	0.604501	0.548748	3	0.816227
CFAP99	1.5966e-30	1.74451e-28	0.550022	1.76565	0.297521	11.4234	0.604455	0.484472	2	0.74621
HIST2H2BF	7.25079e-32	8.32195e-30	0.576647	1.9226	0.292011	11.689	0.604364	0.540891	2	1.35724
PLA2G4C	6.96085e-121	1.05635e-117	0.421748	2.17667	0.220386	23.3496	0.604303	0.590835	4	1.70785
JUND	4.0785e-12	1.45442e-10	1.44546	0.677198	0.578512	6.83576	0.604218	0.538396	6	0.307386
nCoV	7.26904e-111	6.6187e-108	0.548372	2.3137	0.22314	22.3417	0.604048	0.584072	4	1.57136
EPS8L2	2.00516e-13	7.86967e-12	1.13556	1.13982	0.484848	7.25521	0.60402	0.550356	2	0.517261
BAIAP2	5.90611e-12	2.07367e-10	1.3562	0.737336	0.561983	6.78249	0.603595	0.51502	2	0.116669
SF1	5.72147e-12	2.02332e-10	1.25244	0.766395	0.5427	6.78708	0.603036	0.528258	2	0.262177
PIK3R3	2.64036e-17	1.36599e-15	0.858769	1.63815	0.380165	8.38027	0.602495	0.53611	2	1.20815
SRSF7	6.99109e-12	2.42346e-10	1.23636	0.803849	0.534435	6.75809	0.601896	0.544574	6	0.551093
ZNHIT2	2.67946e-14	1.12258e-12	0.883807	1.18874	0.429752	7.52286	0.60056	0.489536	2	0.458041
DPP7	3.13953e-12	1.12841e-10	1.07275	0.980578	0.498623	6.87317	0.600493	0.526938	2	0.500612

## Sheet: Cl02
geneID	pval	fdr	meanExp	logR	expT	rsZ	auc	subMinAuc	subMinIdx	maxLogR
DNAH3	1.5532e-290	2.78488e-287	1.44009	1.85522	0.930556	36.4086	0.866117	0.754398	1	1.07278
SYNE1	2.35724e-265	1.81137e-262	1.60429	1.73757	0.950617	34.781	0.864429	0.757396	5	0.979582
CCDC170	1.68201e-219	4.11251e-217	2.57667	1.37501	0.990741	31.6029	0.86123	0.675128	5	0.379637
DNAH10	2.03412e-257	1.36769e-254	1.45886	1.66064	0.955247	34.252	0.855744	0.713695	5	0.770817
CCDC113	2.24932e-233	8.64219e-231	1.72187	1.55895	0.969136	32.5972	0.854853	0.705831	5	0.689393
NWD1	3.19689e-247	1.61213e-244	1.53907	1.67978	0.938272	33.5602	0.85381	0.696854	5	0.694539
DNAH12	2.24408e-212	4.52659e-210	2.49058	1.39599	0.993827	31.08	0.85242	0.677009	5	0.415212
VWA3A	4.54583e-249	2.4452e-246	1.5075	1.6123	0.962963	33.6866	0.852147	0.66215	1	0.563881
LRRC46	4.35381e-212	8.67376e-210	2.24437	1.39633	0.986111	31.0587	0.850563	0.693181	5	0.48627
FAM216B	5.55574e-229	1.99229e-226	1.93787	1.56075	0.967593	32.2857	0.849381	0.6592	5	0.503256
TMEM231	4.98036e-219	1.19952e-216	1.8866	1.46709	0.987654	31.5686	0.849349	0.673928	5	0.537212
DNAJA4	7.20263e-194	8.24318e-192	2.09602	1.24831	0.989198	29.6788	0.848682	0.703969	5	0.590433
CCDC146	7.79662e-203	1.20975e-200	2.30427	1.34661	0.992284	30.3657	0.846985	0.657388	5	0.391993
C1orf189	0	0	1.22769	2.6921	0.75463	45.1173	0.845036	0.79863	1	1.88495
HYDIN	2.53735e-220	6.49924e-218	1.75052	1.49948	0.967593	31.6627	0.844843	0.638702	1	0.514088
CCDC187	2.15558e-244	1.02307e-241	1.37418	1.60225	0.941358	33.3657	0.844444	0.704639	5	0.75395
MAP3K19	3.498e-261	2.56579e-258	1.20557	1.69468	0.905864	34.504	0.843652	0.717241	5	0.853779
ABCA13	1.98827e-197	2.52635e-195	1.78585	1.41511	0.96142	29.9534	0.842702	0.749272	5	0.920592
VWA3B	3.13025e-226	9.53073e-224	1.55228	1.5516	0.949074	32.0891	0.841465	0.680693	5	0.628654
DNALI1	5.31204e-192	5.83132e-190	2.3077	1.27494	0.993827	29.5337	0.840802	0.581913	1	0.351678
CFAP100	5.64238e-228	1.93726e-225	1.44664	1.52534	0.955247	32.2139	0.839817	0.634761	1	0.453237
DNAH11	3.79894e-233	1.42566e-230	1.3777	1.54395	0.936728	32.5811	0.838444	0.570567	1	0.168456
DRC1	2.60148e-220	6.5594e-218	1.52948	1.51161	0.95216	31.6619	0.837895	0.620581	1	0.460799
NSUN7	9.58527e-287	1.54678e-283	0.878215	1.78295	0.83642	36.1683	0.837703	0.776301	5	1.27035
CALML4	1.1189e-304	2.57939e-301	1.00226	2.10312	0.791667	37.2917	0.837293	0.785811	6	1.46441
DTHD1	2.9478e-222	8.06247e-220	1.52122	1.53988	0.945988	31.8029	0.836848	0.671855	5	0.596003
CCDC190	1.40067e-227	4.61277e-225	1.3626	1.54153	0.939815	32.1857	0.836769	0.702268	5	0.749304
KLHL6	8.75643e-317	2.35504e-313	0.852914	1.89247	0.811728	38.0313	0.834935	0.747727	5	1.09985
AC007906.2	4.40692e-191	4.70956e-189	2.31627	1.37354	0.984568	29.4621	0.833636	0.655596	5	0.46623
ZNF106	4.27996e-184	3.75357e-182	1.63969	1.29992	0.967593	28.9115	0.832874	0.695596	5	0.671091
DNAH9	1.2851e-202	1.97502e-200	1.78321	1.42722	0.970679	30.3493	0.83279	0.651111	5	0.489449
CALM1	1.45612e-166	8.45232e-165	3.74339	0.613078	0.998457	27.4816	0.832761	0.627434	5	0.18019
DNAH6	7.89935e-219	1.84742e-216	1.37733	1.50138	0.941358	31.554	0.831472	0.670181	5	0.608818
RSPH4A	2.19147e-211	4.20997e-209	1.47728	1.46502	0.958333	31.0067	0.831038	0.625533	5	0.459234
CFAP44	4.67147e-212	9.1931e-210	1.40457	1.47464	0.947531	31.0564	0.831025	0.672365	5	0.621295
ENKUR	4.16821e-199	5.6523e-197	1.72501	1.3948	0.978395	30.082	0.830991	0.636112	5	0.451814
CFAP157	5.258e-180	4.28527e-178	2.74913	1.20253	0.998457	28.5844	0.830852	0.472913	1	0.0556196
CFAP221	6.90968e-219	1.63973e-216	1.2957	1.48416	0.939815	31.5582	0.829847	0.661591	5	0.574442
DNAI2	3.08106e-209	5.5864e-207	1.51706	1.44755	0.95679	30.8469	0.829467	0.648017	5	0.512053
SAXO2	8.96787e-189	8.87819e-187	2.06223	1.33448	0.984568	29.2813	0.829348	0.619495	5	0.345928
LDLRAD1	9.24437e-192	1.00118e-189	2.07271	1.38623	0.976852	29.515	0.828381	0.590654	5	0.291212
FAM81B	2.91846e-202	4.40142e-200	1.60588	1.43781	0.950617	30.3222	0.828255	0.677084	5	0.60458
KIAA2012	6.82184e-274	6.47553e-271	0.920216	1.73395	0.83642	35.3413	0.827596	0.709748	5	0.855523
SLFN13	9.38004e-237	3.78414e-234	1.00782	1.54572	0.884259	32.8348	0.827027	0.69464	5	0.721555
MAP1A	1.47724e-222	4.11005e-220	1.24734	1.53807	0.907407	31.8246	0.826198	0.661282	5	0.584326
C4orf47	2.51642e-224	7.25133e-222	1.15854	1.50487	0.910494	31.9522	0.826073	0.651881	1	0.464899
AGBL2	4.07235e-257	2.62862e-254	0.943756	1.62428	0.853395	34.2318	0.825948	0.705604	5	0.781703
CFAP43	4.43467e-186	4.08928e-184	2.02797	1.32378	0.987654	29.0689	0.825926	0.607069	5	0.325329
ECT2L	2.67894e-299	5.40376e-296	0.881542	1.87888	0.794753	36.9583	0.825592	0.735104	5	1.05513
SNTN	3.32621e-178	2.56818e-176	2.84011	1.25129	0.989198	28.4391	0.825353	0.575374	5	0.173724
CDHR3	1.37544e-183	1.19975e-181	2.14473	1.29673	0.992284	28.8711	0.824936	0.586007	5	0.239302
SPAG17	3.4652e-192	3.88319e-190	1.68671	1.35794	0.979938	29.5482	0.824655	0.636677	5	0.452623
CROCC	3.47004e-211	6.51116e-209	1.30093	1.51735	0.908951	30.9919	0.824627	0.666356	5	0.594499
WDR49	6.98846e-222	1.87955e-219	1.10624	1.52816	0.890432	31.7758	0.824445	0.700536	5	0.761296
CCDC17	2.06477e-177	1.55697e-175	2.41396	1.25199	0.996914	28.3749	0.82438	0.579219	5	0.211636
C6orf118	1.84597e-204	2.97885e-202	1.38799	1.43203	0.950617	30.4886	0.824344	0.620372	5	0.442808
FHAD1	5.02401e-200	6.92926e-198	1.43765	1.41491	0.950617	30.1522	0.824063	0.642421	5	0.504253
HSPH1	1.15094e-161	6.01057e-160	2.69101	1.02322	0.99537	27.0687	0.823851	0.643214	5	0.317488
LRP11	2.2355e-172	1.47242e-170	1.50825	1.24241	0.959877	27.9639	0.820404	0.675226	5	0.610861
WDR63	7.10407e-228	2.3883e-225	0.974846	1.45953	0.893519	32.2067	0.819867	0.684165	5	0.661504
TMC5	5.51537e-157	2.5723e-155	2.41924	0.976467	0.987654	26.6681	0.819264	0.677088	5	0.452379
LRRC10B	3.4647e-207	5.94786e-205	1.26888	1.4729	0.915123	30.6936	0.818991	0.640701	5	0.519245
CFAP73	2.95545e-182	2.45836e-180	1.74358	1.31242	0.975309	28.7648	0.818879	0.59938	1	0.412063
NEK10	8.09362e-209	1.45119e-206	1.18156	1.41225	0.921296	30.8156	0.817959	0.631332	5	0.437132
SPEF2	5.94379e-187	5.67544e-185	1.5422	1.34589	0.964506	29.1379	0.817719	0.625239	5	0.429721
PCM1	2.47143e-160	1.23472e-158	1.95059	1.11756	0.987654	26.9553	0.817627	0.676786	5	0.516504
FILIP1	1.29983e-238	5.51985e-236	0.923681	1.60298	0.837963	32.9648	0.817132	0.706424	5	0.811608
KIF21A	1.79665e-160	9.00389e-159	1.9966	1.17743	0.962963	26.9671	0.816999	0.650197	5	0.462863
ERICH3	1.12908e-179	9.06465e-178	2.05916	1.33866	0.973765	28.5576	0.81684	0.559211	5	0.208388
ALDH3B1	4.57826e-163	2.50439e-161	2.01384	1.1803	0.972222	27.1874	0.816614	0.621104	5	0.350532
CSPP1	2.18823e-187	2.11446e-185	1.32928	1.36094	0.933642	29.1721	0.816464	0.618326	1	0.434531
STK33	5.18231e-194	5.97335e-192	1.32051	1.38651	0.932099	29.6899	0.815583	0.624155	5	0.428245
DNAH5	7.59319e-169	4.58919e-167	2.30313	1.26489	0.972222	27.672	0.814732	0.56992	5	0.185059
IK	1.50029e-152	6.35438e-151	2.61913	1.03743	0.99537	26.283	0.813948	0.576977	5	0.203002
PTPRT	1.50597e-241	6.94336e-239	0.874548	1.65248	0.813272	33.169	0.813878	0.717495	5	0.908295
SPATA17	2.55016e-211	4.8414e-209	1.04946	1.44005	0.893519	31.0018	0.813805	0.664539	1	0.535657
RFX2	4.72218e-179	3.75378e-177	1.33921	1.2921	0.95679	28.5075	0.813152	0.653016	5	0.560546
DNAH7	2.28506e-183	1.95101e-181	1.44026	1.31245	0.964506	28.8536	0.81297	0.607546	5	0.375882
IQCG	1.08538e-175	7.74992e-174	1.51933	1.28782	0.966049	28.2351	0.812002	0.625232	5	0.437354
CC2D2A	7.59615e-192	8.28238e-190	1.21814	1.3891	0.912037	29.5216	0.811964	0.630604	5	0.463072
ARMC3	7.53777e-174	5.1108e-172	1.73335	1.28888	0.976852	28.0847	0.811939	0.602981	5	0.366673
AK7	1.29622e-218	2.98817e-216	0.990142	1.4931	0.865741	31.5383	0.811689	0.646873	5	0.529962
AC113349.1	0	0	0.712406	1.9924	0.717593	39.3236	0.811608	0.709033	1	0.751596
TTC29	3.01974e-227	9.5548e-225	0.915971	1.50165	0.851852	32.1618	0.811415	0.697273	5	0.777019
ARHGAP18	1.88689e-155	8.5771e-154	1.92173	1.12522	0.975309	26.5355	0.811083	0.630475	5	0.394959
ANKUB1	1.82426e-217	3.97813e-215	1.06131	1.5045	0.864198	31.4545	0.810406	0.656818	5	0.568854
DZIP1L	1.73933e-236	6.84574e-234	0.965825	1.62849	0.816358	32.816	0.810304	0.691379	5	0.767022
NEK11	1.39787e-202	2.12807e-200	0.977276	1.37882	0.890432	30.3465	0.809686	0.683983	5	0.685535
CCDC65	1.44984e-200	2.10775e-198	1.11193	1.39376	0.907407	30.1933	0.809369	0.649788	5	0.540541
TBC1D8	8.08501e-252	4.65956e-249	0.728382	1.70116	0.762346	33.8739	0.808826	0.680464	1	0.460193
KIAA1211L	4.60085e-177	3.42138e-175	1.22397	1.31836	0.91821	28.3467	0.808728	0.66333	5	0.58833
SRGAP3-AS2	8.10503e-201	1.19992e-198	1.30522	1.51301	0.87963	30.2125	0.808701	0.670543	5	0.653506
CFAP54	1.08855e-224	3.1938e-222	0.925438	1.47466	0.845679	31.9784	0.808646	0.654281	1	0.366049
SLC22A4	7.90766e-199	1.05459e-196	1.14587	1.44568	0.890432	30.0607	0.808437	0.618494	5	0.446602
MAPRE3	4.69141e-200	6.52631e-198	0.965081	1.37338	0.885802	30.1544	0.808433	0.680312	5	0.65433
EFCAB1	4.13206e-166	2.38993e-164	1.95844	1.24518	0.979938	27.4437	0.808375	0.592088	5	0.303488
SPAG1	4.82293e-166	2.77956e-164	1.3633	1.24343	0.944444	27.4381	0.80834	0.664148	1	0.639081
PROM1	1.02918e-175	7.38125e-174	1.54388	1.34698	0.930556	28.237	0.808326	0.591666	5	0.321262
DNAH1	9.26656e-218	2.04842e-215	0.906522	1.41369	0.859568	31.476	0.807979	0.652499	1	0.352445
LINC01765	1.43888e-218	3.27032e-216	1.03931	1.52785	0.848765	31.535	0.807816	0.685357	5	0.720163
DZIP3	1.73748e-177	1.31632e-175	1.4362	1.30197	0.95679	28.381	0.80758	0.570625	5	0.270912
TTLL10	6.8459e-185	6.10344e-183	1.26312	1.3026	0.941358	28.9747	0.80698	0.611059	5	0.378185
BDH1	8.95919e-201	1.31431e-198	0.968175	1.57492	0.822531	30.2092	0.806906	0.732912	5	1.03096
DLEC1	3.79056e-183	3.21938e-181	1.3533	1.30056	0.938272	28.836	0.806764	0.640214	5	0.431896
CCDC180	1.93442e-208	3.43029e-206	0.995002	1.41075	0.876543	30.7874	0.806758	0.665881	5	0.586602
SMYD2	1.26894e-186	1.19051e-184	1.02838	1.35764	0.893519	29.1119	0.806687	0.662552	5	0.605953
APOBEC4	2.28731e-246	1.1185e-243	0.817304	1.60545	0.799383	33.5016	0.806666	0.704536	5	0.83974
MAPK10	8.74988e-180	7.05984e-178	1.13309	1.29949	0.916667	28.5665	0.80654	0.647258	5	0.51785
CCDC125	1.43987e-220	3.74762e-218	0.785468	1.62851	0.783951	31.6805	0.805842	0.760048	5	1.23599
AL357093.2	8.98891e-168	5.27469e-166	2.20263	1.33253	0.953704	27.5826	0.805523	0.601296	5	0.330129
CNTRL	6.59598e-190	6.86706e-188	0.993597	1.3079	0.899691	29.3702	0.805335	0.68529	5	0.65821
RFX3	1.20631e-169	7.48701e-168	1.42669	1.26636	0.95679	27.7383	0.804735	0.571681	5	0.266833
KIF3B	5.73358e-172	3.73076e-170	1.06779	1.31826	0.890432	27.9302	0.803431	0.706662	5	0.636325
UBXN10	7.42139e-176	5.37036e-174	1.28841	1.31236	0.927469	28.2485	0.803366	0.61859	5	0.426599
CCDC78	3.50647e-153	1.5009e-151	2.67805	1.13858	0.993827	26.3382	0.803266	0.558519	5	0.16092
DNAH2	4.67028e-194	5.4219e-192	1.07816	1.34178	0.898148	29.6934	0.802914	0.620532	5	0.40008
CTXN1	1.91982e-176	1.40182e-174	1.31687	1.32674	0.930556	28.2963	0.802592	0.638574	6	0.353478
STOML3	1.44669e-189	1.47755e-187	1.24189	1.40084	0.898148	29.3435	0.802567	0.591216	5	0.342152
BBOF1	1.35351e-170	8.56531e-169	1.36169	1.25589	0.950617	27.8169	0.802563	0.645144	5	0.506402
MOK	2.51319e-179	2.00769e-177	1.13772	1.27083	0.919753	28.5296	0.80248	0.614429	1	0.322176
BAIAP2L1	7.14931e-157	3.31519e-155	1.23647	1.18479	0.929012	26.6584	0.802308	0.731734	5	0.882399
ELN-AS1	1.48767e-317	4.80131e-314	0.662527	1.9424	0.699074	38.0779	0.802294	0.697869	1	0.726984
RAB36	7.97315e-187	7.5684e-185	1.14107	1.35512	0.901235	29.1278	0.802034	0.641098	5	0.501729
SPATA18	1.73433e-160	8.71868e-159	1.74132	1.24034	0.972222	26.9684	0.801758	0.580917	5	0.306373
WDR38	6.32688e-160	3.14144e-158	1.99511	1.23508	0.962963	26.9205	0.801726	0.60585	5	0.335976
ARMC4	2.50731e-200	3.54916e-198	1.01141	1.41215	0.868827	30.1752	0.801436	0.62688	5	0.448039
SPAG6	6.17372e-162	3.24512e-160	1.76351	1.24804	0.970679	27.0917	0.80115	0.552209	5	0.229682
CFAP70	4.57419e-169	2.77495e-167	1.46223	1.27705	0.941358	27.6903	0.801077	0.603997	5	0.343682
AC009652.2	0	0	0.603414	2.47628	0.626543	48.1319	0.800953	0.766423	1	1.63738
IGFBP7	2.35407e-148	9.26529e-147	3.07731	1.13341	0.975309	25.9134	0.800648	0.57886	5	0.180653
CFAP57	1.90512e-197	2.43992e-195	0.96211	1.34035	0.87963	29.9548	0.800408	0.62546	5	0.404397
LRRC6	4.75092e-188	4.61841e-186	1.00865	1.32861	0.888889	29.2244	0.799856	0.644058	5	0.509884
RP1	2.75712e-169	1.68529e-167	1.49555	1.27987	0.942901	27.7085	0.799737	0.574699	5	0.262928
EFCAB12	9.72501e-249	5.06234e-246	0.693554	1.53626	0.771605	33.664	0.799458	0.710913	6	0.838294
GPR162	2.77149e-173	1.86348e-171	1.29887	1.28298	0.942901	28.0383	0.79902	0.600764	5	0.369074
OMG	1.13861e-161	5.96552e-160	2.30195	1.31135	0.950617	27.0691	0.798228	0.549007	5	0.176604
CCDC114	6.66948e-158	3.14694e-156	1.62607	1.19687	0.976852	26.7471	0.797674	0.544224	1	0.230451
PPIL6	1.1052e-158	5.37186e-157	1.56002	1.21299	0.970679	26.8141	0.797284	0.610416	1	0.448676
IL5RA	9.59561e-256	5.95555e-253	0.705143	1.62191	0.751543	34.1394	0.797047	0.716568	5	0.927585
TRAF3IP1	1.70756e-171	1.09345e-169	1.09221	1.27408	0.907407	27.8912	0.797	0.627693	5	0.455379
HACD4	9.15358e-181	7.49804e-179	1.01658	1.35516	0.868827	28.6454	0.796935	0.637329	5	0.492657
SLC7A2	1.39134e-185	1.26848e-183	0.970061	1.38117	0.858025	29.0296	0.796928	0.664191	5	0.608099
ZBBX	2.08681e-159	1.02045e-157	1.5681	1.21288	0.967593	26.8762	0.79683	0.572183	5	0.259056
TSGA10	4.55041e-183	3.8445e-181	0.939866	1.30936	0.867284	28.8297	0.796517	0.667331	5	0.598885
BASP1	2.99807e-148	1.17713e-146	1.86166	1.16405	0.978395	25.904	0.796352	0.572643	5	0.285337
PLEKHG7	3.88809e-197	4.86373e-195	0.841198	1.43229	0.813272	29.931	0.796233	0.691808	5	0.709265
VNN3	1.38234e-257	9.69861e-255	0.7357	1.76038	0.728395	34.2633	0.796166	0.748964	5	1.26414
WDR78	1.36487e-164	7.70103e-163	1.36016	1.25024	0.938272	27.3161	0.795309	0.571446	5	0.274123
LRRC74B	8.94945e-229	3.13951e-226	0.801934	1.45424	0.785494	32.2709	0.794808	0.59834	1	-0.0174912
FAM13A	5.1466e-185	4.63971e-183	0.841033	1.29748	0.851852	28.9846	0.794731	0.684394	5	0.63433
CASC1	2.91254e-200	4.08693e-198	0.908087	1.41291	0.828704	30.1702	0.794235	0.662053	5	0.588386
CFAP69	1.52139e-196	1.87409e-194	0.876992	1.34741	0.837963	29.8854	0.793929	0.637001	1	0.274415
FRMPD2	3.08649e-206	5.24281e-204	0.83458	1.35264	0.825617	30.6223	0.793695	0.643531	1	0.271305
IQUB	1.87605e-240	8.40941e-238	0.720676	1.58908	0.753086	33.093	0.793628	0.708833	5	0.882703
PLCH1	1.86615e-266	1.5057e-263	0.597718	1.63395	0.720679	34.8538	0.793427	0.722474	5	0.951881
CLMN	1.72267e-148	6.79676e-147	1.3038	1.15074	0.936728	25.9254	0.792972	0.640113	5	0.505749
CCDC191	1.20459e-194	1.42929e-192	0.85607	1.35255	0.83642	29.739	0.792861	0.663543	5	0.574064
FANK1	6.10334e-158	2.88826e-156	1.37129	1.21205	0.942901	26.7504	0.792665	0.594364	5	0.332805
WDR66	3.26009e-154	1.42184e-152	1.51931	1.18084	0.979938	26.4281	0.792613	0.557233	5	0.237479
TCTN1	1.2851e-154	5.66604e-153	1.32792	1.20921	0.941358	26.4632	0.791647	0.589213	5	0.349586
SYNE2	2.25997e-136	6.94649e-135	1.63126	1.05198	0.96142	24.8276	0.791216	0.682909	5	0.621506
LRRC23	3.08824e-139	1.01497e-137	2.16687	1.09313	0.981481	25.0914	0.791094	0.473776	1	0.0944577
MAP6	7.80783e-205	1.27268e-202	0.828457	1.45781	0.805556	30.5168	0.791071	0.664984	5	0.635559
EMB	1.00526e-186	9.48647e-185	0.78321	1.41167	0.799383	29.1199	0.79026	0.721817	5	0.926581
SPATA6	1.94618e-186	1.80491e-184	0.821573	1.33272	0.828704	29.0972	0.790149	0.667398	5	0.593911
TUBA4B	1.0676e-159	5.26848e-158	1.40591	1.221	0.941358	26.901	0.789905	0.55661	1	0.146405
CFAP299	5.50193e-204	8.79056e-202	0.787334	1.37972	0.810185	30.4528	0.78961	0.646293	5	0.498161
CCDC74B	1.55714e-183	1.34372e-181	0.979019	1.35487	0.848765	28.8668	0.789385	0.654294	6	0.465415
CFAP47	2.02592e-231	7.43005e-229	0.717419	1.46877	0.757716	32.4589	0.789013	0.645432	1	0.180502
CCDC40	2.68541e-172	1.76157e-170	0.998262	1.18632	0.888889	27.9573	0.788851	0.4937	1	-0.246135
NME9	2.69185e-275	2.8959e-272	0.563385	1.65357	0.699074	35.4326	0.788474	0.726577	6	1.09899
PPOX	5.0522e-176	3.6724e-174	0.892791	1.24578	0.865741	28.2621	0.788364	0.623382	5	0.379666
MAP9	3.04614e-157	1.42894e-155	1.1306	1.23313	0.893519	26.6903	0.788363	0.611158	5	0.387823
DRC7	1.23852e-197	1.59888e-195	0.819397	1.3445	0.820988	29.9692	0.788245	0.657383	5	0.557484
MT-ATP8	2.35169e-136	7.21469e-135	3.80168	1.17743	0.87963	24.826	0.788134	0.658102	4	0.33247
MAATS1	4.27371e-169	2.60245e-167	1.02807	1.18462	0.910494	27.6927	0.787896	0.591161	5	0.275148
ANKMY1	9.29683e-172	5.97701e-170	0.914314	1.22616	0.871914	27.9129	0.787428	0.639118	5	0.447133
SAMHD1	3.98853e-133	1.15969e-131	1.58997	1.00546	0.969136	24.5251	0.78733	0.671409	5	0.604897
TOGARAM2	1.7184e-161	8.88777e-160	1.22058	1.2004	0.91821	27.0539	0.786506	0.583016	5	0.262828
TTC21A	4.06928e-177	3.04009e-175	0.888423	1.22286	0.864198	28.351	0.786494	0.641294	5	0.435751
RSPH3	6.20596e-149	2.46664e-147	1.12795	1.14931	0.919753	25.9647	0.78649	0.638454	5	0.491812
C20orf85	2.97988e-131	8.31943e-130	4	1.00467	0.99537	24.3489	0.786353	0.49862	5	0.0273592
AK9	2.51113e-163	1.39731e-161	1.05217	1.2271	0.887346	27.2094	0.786091	0.615991	5	0.389951
C1orf87	7.06311e-190	7.30625e-188	0.861357	1.34316	0.825617	29.3679	0.785903	0.629765	5	0.446084
TCTEX1D1	5.11043e-178	3.927e-176	0.936775	1.25004	0.868827	28.424	0.785661	0.603355	5	0.328018
PPP1R32	6.91121e-180	5.60433e-178	1.01956	1.31666	0.850309	28.5748	0.78511	0.630641	5	0.448786
TNFAIP8L1	2.34467e-151	9.72645e-150	1.41827	1.1969	0.941358	26.1783	0.785079	0.574751	5	0.293886
RPGR	5.30001e-171	3.36717e-169	0.873847	1.21689	0.862654	27.8506	0.785067	0.63783	5	0.442471
LINC02166	1.43185e-205	2.35772e-203	0.775944	1.45794	0.774691	30.5722	0.784997	0.671005	6	0.676983
ADGB	2.16948e-200	3.09814e-198	0.764275	1.31605	0.800926	30.18	0.784945	0.629377	1	0.167359
MGLL	2.5088e-155	1.13402e-153	1.12401	1.29308	0.859568	26.5248	0.784668	0.702252	5	0.812088
NPHP1	2.43278e-153	1.04409e-151	1.1986	1.16903	0.933642	26.352	0.784565	0.603219	5	0.364682
IGFBP2	4.00975e-125	1.00787e-123	2.76512	0.85169	0.996914	23.7632	0.784459	0.537385	5	0.134635
CDHR4	1.21084e-146	4.56526e-145	1.60338	1.16792	0.962963	25.7611	0.784454	0.530291	5	0.149652
HSP90AB1	2.63133e-122	6.27206e-121	3.46965	0.58558	0.99537	23.4892	0.784373	0.624013	5	0.204342
IQCE	2.176e-183	1.86777e-181	0.768049	1.28866	0.819444	28.8553	0.784338	0.678425	6	0.619683
ANKFN1	1.8741e-283	2.52019e-280	0.546884	1.65791	0.680556	35.9583	0.784149	0.71906	5	0.974436
CHST6	3.69559e-161	1.88721e-159	0.974298	1.25084	0.862654	27.0256	0.784115	0.655592	5	0.541899
KIAA0556	3.68039e-187	3.53515e-185	0.701429	1.32127	0.78858	29.1543	0.784076	0.716305	5	0.81673
APPL2	6.8682e-175	4.83983e-173	0.804183	1.35488	0.802469	28.1697	0.783754	0.681649	5	0.694453
EFHB	2.46795e-174	1.71661e-172	0.981294	1.31625	0.845679	28.1244	0.783725	0.627313	5	0.463949
LRRC71	1.48866e-169	9.16891e-168	0.973841	1.18839	0.887346	27.7307	0.783692	0.609573	5	0.338261
MARCH10	7.92238e-191	8.41075e-189	0.809614	1.28325	0.813272	29.4422	0.783641	0.552376	1	-0.157895
CES1	8.04887e-130	2.20892e-128	2.56773	1.06284	0.978395	24.2133	0.783321	0.49349	5	0.0445787
CCP110	1.45689e-159	7.16764e-158	0.973568	1.18832	0.888889	26.8895	0.783275	0.632644	5	0.439557
IFT81	3.47353e-163	1.90654e-161	0.937744	1.24067	0.858025	27.1975	0.782884	0.625093	5	0.418871
CFAP45	2.64919e-143	9.37499e-142	1.62649	1.16417	0.955247	25.4613	0.782715	0.572063	1	0.303116
PRR29	3.60823e-140	1.21052e-138	1.72837	1.12942	0.969136	25.1767	0.782621	0.52919	5	0.14109
TTC16	1.05383e-213	2.20852e-211	0.697637	1.40092	0.763889	31.1781	0.782586	0.675244	5	0.623714
TEX9	6.19373e-168	3.66111e-166	0.855482	1.23594	0.844136	27.5961	0.782512	0.649045	5	0.500559
ZNF487	1.10379e-173	7.45267e-172	0.863766	1.27106	0.828704	28.0711	0.782492	0.61914	1	0.215799
CYB561	1.79067e-139	5.93348e-138	1.13077	1.11119	0.916667	25.1131	0.782009	0.674782	5	0.564322
TMEM254	3.59616e-181	2.96078e-179	0.739925	1.33635	0.79321	28.6779	0.781993	0.690602	5	0.73708
LZTFL1	1.17424e-158	5.69029e-157	0.922012	1.16687	0.885802	26.8119	0.781741	0.610881	5	0.349786
DCDC1	2.54848e-189	2.5703e-187	0.778454	1.25151	0.813272	29.3242	0.781711	0.632282	5	0.352397
GAPVD1	5.64522e-155	2.52346e-153	0.892624	1.25931	0.837963	26.4942	0.781615	0.70524	5	0.799153
CCDC39	2.96375e-284	4.34782e-281	0.596876	1.75766	0.666667	36.0096	0.7812	0.670895	1	0.561423
JPT2	3.38097e-132	9.63936e-131	1.29653	1.06201	0.932099	24.4379	0.781121	0.660326	5	0.469425
CCDC30	7.46562e-166	4.28729e-164	0.986079	1.2093	0.865741	27.4222	0.781024	0.525301	1	-0.101016
CFAP74	2.17807e-170	1.37295e-168	0.906745	1.20553	0.858025	27.7998	0.780609	0.634118	5	0.308889
ARMC2	2.99053e-194	3.52249e-192	0.713706	1.31953	0.782407	29.7084	0.780493	0.673539	5	0.600969
LCA5	9.08178e-176	6.54253e-174	0.833205	1.30734	0.810185	28.2414	0.780371	0.668253	5	0.608504
IFT172	2.42427e-134	7.15182e-133	1.37117	1.07573	0.950617	24.6388	0.780344	0.568678	5	0.271257
BAIAP3	1.48843e-183	1.29133e-181	0.862062	1.28823	0.814815	28.8684	0.780223	0.644639	5	0.453997
CFAP65	1.81528e-154	7.9601e-153	1.1296	1.1437	0.910494	26.4502	0.780113	0.580977	5	0.257012
SPACA9	1.33046e-143	4.72901e-142	1.36689	1.155	0.939815	25.4883	0.780109	0.56259	5	0.244691
CCDC74A	8.16519e-150	3.29924e-148	1.3382	1.20087	0.91821	26.0426	0.780041	0.601147	6	0.192442
AKNA	3.86372e-162	2.04422e-160	0.880632	1.15878	0.865741	27.1089	0.7799	0.650924	5	0.484374
RABL2B	3.70963e-136	1.13376e-134	1.48441	1.09346	0.970679	24.8076	0.779668	0.533069	5	0.167867
RSPH1	1.01486e-124	2.53118e-123	3.2635	0.981907	1	23.7242	0.779553	0.484598	5	0.0295468
METTL27	1.94932e-161	1.00499e-159	0.978363	1.22558	0.847222	27.0492	0.779144	0.582585	1	0.077148
DNAI1	2.80415e-147	1.06975e-145	1.28223	1.13733	0.932099	25.8177	0.77911	0.565405	5	0.218126
MTSS1L	9.59767e-179	7.555e-177	0.7195	1.36448	0.771605	28.4827	0.778994	0.707162	1	0.70081
CABCOCO1	7.71402e-163	4.17722e-161	1.00555	1.25214	0.864198	27.1682	0.778807	0.590615	5	0.318502
PLEKHS1	2.31404e-131	6.48292e-130	1.41957	1.07261	0.944444	24.3592	0.77878	0.663031	5	0.557298
TTC12	3.07323e-214	6.52536e-212	0.633399	1.4776	0.723765	31.2176	0.778749	0.705126	5	0.872913
DRC3	1.80285e-132	5.18585e-131	2.02351	1.0921	0.984568	24.4636	0.778633	0.52362	5	0.135025
AL590491.2	0	0	0.546699	2.1007	0.606481	41.3484	0.778422	0.749656	6	1.46253
ZDHHC1	7.87291e-150	3.19209e-148	1.09657	1.20017	0.878086	26.044	0.778281	0.643933	1	0.461537
C2orf73	6.97713e-208	1.2238e-205	0.716074	1.48357	0.739198	30.7457	0.778253	0.678599	5	0.717392
KIF19	5.6194e-175	3.99472e-173	0.839028	1.22323	0.834877	28.1769	0.778236	0.623279	5	0.369927
ENAH	1.10782e-132	3.20375e-131	1.23672	1.0572	0.935185	24.4835	0.778203	0.623272	5	0.444867
SCAMP4	1.63772e-145	6.04756e-144	0.923495	1.13057	0.87963	25.6599	0.778091	0.67328	5	0.604092
KIF27	3.05068e-226	9.46708e-224	0.614945	1.54752	0.70216	32.0899	0.777768	0.67741	1	0.545123
CEP126	5.74499e-138	1.85414e-136	1.49257	1.1239	0.949074	24.9748	0.777757	0.546354	1	0.217129
IFT140	2.53624e-190	2.67499e-188	0.706207	1.29543	0.777778	29.4027	0.777677	0.639414	1	0.227656
GRIN3B	1.53356e-191	1.64981e-189	0.72346	1.28648	0.78858	29.4979	0.777441	0.644222	5	0.444986
PPP4R3B	6.86733e-137	2.13112e-135	1.04474	1.09526	0.896605	24.8754	0.777359	0.690422	5	0.705654
EFHC1	6.0896e-126	1.55733e-124	2.42041	1.03812	0.992284	23.8423	0.777106	0.487227	5	0.0498886
TTC25	8.11265e-156	3.71914e-154	1.04834	1.18674	0.887346	26.5673	0.776724	0.565896	5	0.211072
ROPN1L	7.71828e-134	2.26454e-132	1.97992	1.12979	0.966049	24.5919	0.776652	0.543507	5	0.206246
GAS2L2	4.43982e-189	4.42255e-187	0.738292	1.28667	0.78858	29.3053	0.776547	0.635044	5	0.41275
SLAIN2	4.08573e-143	1.43955e-141	1.00176	1.20462	0.853395	25.4443	0.776424	0.653209	5	0.570655
ODF3B	6.1213e-118	1.36624e-116	2.89327	0.897752	0.990741	23.0579	0.776405	0.535245	5	0.114973
CFAP77	1.28157e-172	8.5106e-171	0.850854	1.26096	0.828704	27.9837	0.776098	0.609649	5	0.359548
IPO11	1.52536e-200	2.19775e-198	0.706862	1.55093	0.720679	30.1916	0.775893	0.695116	5	0.853757
UBAC1	1.66327e-135	4.98887e-134	1.14132	1.10564	0.904321	24.7472	0.775821	0.614477	5	0.412459
ZNF474	4.19767e-275	4.23361e-272	0.534592	1.65998	0.655864	35.42	0.775793	0.707721	6	0.815389
DNAAF3	8.77564e-155	3.90117e-153	1.03832	1.1617	0.888889	26.4776	0.775703	0.580122	5	0.255803
HIPK1	1.50481e-128	4.02038e-127	1.35752	1.03219	0.959877	24.0923	0.775625	0.56985	5	0.268201
WDR60	7.83951e-138	2.50507e-136	1.21655	1.09807	0.91358	24.9624	0.775401	0.482725	1	-0.140106
DNAAF1	1.38357e-125	3.50498e-124	2.63867	1.03798	0.99537	23.8079	0.775257	0.484628	5	0.0351072
TOGARAM1	1.32356e-163	7.41606e-162	0.773115	1.17908	0.825617	27.2329	0.775093	0.665047	5	0.516409
CEP290	5.75028e-158	2.72918e-156	0.900953	1.29734	0.810185	26.7527	0.775013	0.664174	5	0.616282
IQCD	4.49524e-148	1.75641e-146	1.05274	1.13727	0.902778	25.8884	0.774124	0.572626	5	0.249661
LAP3	5.32623e-127	1.37299e-125	1.30148	1.06979	0.916667	23.9441	0.773969	0.734834	5	0.932023
FAM166B	7.91425e-136	2.3961e-134	1.70737	1.14218	0.970679	24.7771	0.773935	0.482253	5	0.0781801
GON7	1.03953e-135	3.14135e-134	1.30049	1.14924	0.905864	24.7661	0.773612	0.571139	5	0.280091
TP73	2.38751e-188	2.34922e-186	0.691445	1.2842	0.774691	29.2479	0.773592	0.664661	5	0.570636
UNC119B	5.05299e-164	2.84112e-162	0.792613	1.24954	0.816358	27.2682	0.773465	0.638451	5	0.484223
OSBPL6	6.61487e-175	4.68176e-173	0.922183	1.35717	0.790123	28.1711	0.77296	0.611872	5	0.372616
RB1CC1	1.64959e-127	4.27964e-126	1.20039	1.04069	0.925926	23.9929	0.772931	0.669471	5	0.603642
LCA5L	1.74013e-198	2.28297e-196	0.65519	1.37165	0.737654	30.0345	0.772784	0.674673	5	0.632047
PRSS12	2.02903e-162	1.08779e-160	0.790218	1.20586	0.814815	27.1326	0.772735	0.646873	5	0.468777
AKAP9	8.77081e-114	1.82861e-112	2.2723	0.812886	0.986111	22.6399	0.772126	0.584157	5	0.240933
AC013264.1	2.98758e-132	8.56314e-131	1.83871	1.13983	0.96142	24.443	0.772058	0.488452	5	0.0743831
PRKAR1A	3.39748e-114	7.1387e-113	2.04275	0.804765	0.989198	22.6817	0.772056	0.549796	5	0.210093
DENND6B	2.33933e-142	8.17096e-141	1.07187	1.06438	0.91821	25.3757	0.771977	0.571437	5	0.217424
ANK3	7.0412e-145	2.5765e-143	0.870037	1.18415	0.833333	25.6031	0.771952	0.687763	5	0.697355
IFT46	1.14655e-184	1.01659e-182	0.621392	1.31805	0.75	28.957	0.771791	0.679067	5	0.646084
ICA1L	1.3003e-184	1.14661e-182	0.675139	1.29243	0.762346	28.9526	0.771751	0.656821	5	0.508162
PHTF1	3.09675e-167	1.81059e-165	0.71988	1.21771	0.794753	27.5378	0.771698	0.672009	5	0.599839
SPAG8	1.79486e-139	5.93517e-138	1.30515	1.13286	0.91821	25.113	0.771185	0.514206	5	0.0822709
STOX1	2.70846e-158	1.30078e-156	0.813254	1.19503	0.825617	26.7807	0.770424	0.610095	5	0.343419
CELSR1	3.97632e-129	1.07481e-127	1.04901	1.05779	0.899691	24.1474	0.770369	0.669666	5	0.612243
CFAP46	3.93875e-148	1.54271e-146	1.01446	1.09407	0.884259	25.8935	0.770175	0.556212	1	-0.023681
CFAP61	1.56552e-227	5.05255e-225	0.532207	1.42928	0.686728	32.1822	0.769999	0.703857	5	0.821982
UBXN11	2.10342e-123	5.13507e-122	1.64928	1.01408	0.984568	23.5963	0.769652	0.322922	1	-0.312531
IFT88	1.77733e-146	6.66995e-145	0.959736	1.12402	0.87037	25.7462	0.769599	0.592305	5	0.282538
C20orf96	3.86462e-141	1.31291e-139	1.07845	1.12456	0.895062	25.2651	0.769407	0.582033	5	0.282624
MAPK15	2.86501e-128	7.57913e-127	1.56892	1.05842	0.972222	24.0656	0.769404	0.51086	5	0.0970929
EFCAB6	5.41603e-251	3.01374e-248	0.482781	1.5085	0.657407	33.8177	0.769334	0.718151	5	0.811303
MNS1	5.76672e-133	1.6737e-131	1.42247	1.0985	0.945988	24.5101	0.76927	0.521002	5	0.121114
ARMH1	3.1397e-174	2.17448e-172	0.718054	1.20914	0.783951	28.1158	0.769142	0.643942	5	0.4366
CD24	3.99599e-110	7.66744e-109	3.2429	0.612275	0.996914	22.2654	0.769077	0.629502	5	0.244861
DYNLRB2	3.298e-120	7.62463e-119	2.53056	1.04486	0.986111	23.283	0.769035	0.480697	5	0.0595037
EFCAB10	5.44697e-146	2.02064e-144	1.11427	1.15972	0.885802	25.7027	0.768936	0.537964	5	0.136576
TTC26	7.42294e-174	5.07559e-172	0.693751	1.23037	0.780864	28.0852	0.768785	0.641238	5	0.436915
ANKRD66	3.31784e-151	1.37282e-149	1.11487	1.22523	0.854938	26.1651	0.768743	0.547879	5	0.160678
HLA-DRB1	4.55443e-112	9.11847e-111	2.34207	0.876571	0.969136	22.4651	0.768712	0.718475	5	0.66261
TSNAXIP1	6.2839e-177	4.65153e-175	0.697982	1.19569	0.777778	28.3357	0.768677	0.656263	5	0.252105
AC004832.1	1.7611e-137	5.56143e-136	1.22284	1.14298	0.899691	24.93	0.768526	0.575311	5	0.274886
CD74	3.32685e-109	6.25703e-108	4.21485	0.495746	0.993827	22.1703	0.76852	0.70424	3	0.296172
RABL2A	6.64808e-148	2.58506e-146	0.921192	1.09759	0.859568	25.8733	0.768288	0.592109	5	0.232462
KIF3A	1.87004e-147	7.18495e-146	0.865759	1.13499	0.850309	25.8334	0.768091	0.587327	5	0.25691
EFCAB2	4.5787e-137	1.42914e-135	1.04084	1.10115	0.891975	24.8917	0.768079	0.569578	5	0.238239
FAM92B	1.93364e-123	4.72774e-122	2.18049	1.08788	0.978395	23.5999	0.768056	0.453798	5	0.010853
CCDC96	2.56848e-169	1.57596e-167	0.705371	1.21906	0.785494	27.7111	0.76789	0.635754	6	0.488662
ST5	2.65555e-141	9.05974e-140	0.800707	1.11445	0.833333	25.2799	0.767681	0.699159	5	0.742044
IFT57	3.86208e-114	8.10434e-113	2.12121	0.962261	0.975309	22.676	0.767679	0.518408	5	0.156621
CCDC88C	3.04731e-128	8.04818e-127	1.08947	1.06965	0.885802	24.0631	0.767297	0.64734	5	0.512693
ALOX15	1.53035e-121	3.58943e-120	1.74651	1.1093	0.907407	23.4142	0.767251	0.574241	5	0.267344
PKIG	2.78701e-143	9.84114e-142	0.907793	1.12384	0.856481	25.4593	0.767205	0.63356	5	0.455433
IFT74	6.06026e-168	3.59538e-166	0.683984	1.26053	0.763889	27.5969	0.767031	0.680206	5	0.672425
CGN	9.51736e-138	3.02922e-136	0.868083	1.13067	0.841049	24.9546	0.766965	0.712427	1	0.745113
DZANK1	1.29154e-205	2.14862e-203	0.548527	1.29845	0.709877	30.5756	0.766947	0.687441	5	0.641713
IFT122	7.37034e-172	4.75741e-170	0.676518	1.18059	0.773148	27.9212	0.766894	0.664161	5	0.520709
CFAP36	3.85032e-130	1.0621e-128	1.08998	1.08713	0.888889	24.2437	0.766724	0.630967	5	0.352826
CTSS	3.92763e-111	7.74819e-110	1.93282	0.861572	0.970679	22.3692	0.766536	0.559624	5	0.23793
CAST	1.08168e-108	2.01328e-107	2.22825	0.692329	0.993827	22.1171	0.766418	0.646399	4	0.426626
DCDC2B	4.2282e-150	1.72735e-148	1.05045	1.18885	0.851852	26.0678	0.766399	0.551018	5	0.151719
TMF1	4.47096e-119	1.0176e-117	1.14693	0.956411	0.933642	23.1709	0.766364	0.658496	5	0.570209
IQCK	4.00966e-136	1.22314e-134	0.950973	1.07763	0.875	24.8045	0.765925	0.604623	5	0.333238
B3GNT5	2.00118e-131	5.61618e-130	0.926794	1.07266	0.865741	24.3652	0.76574	0.686158	5	0.664445
TMEM232	1.32885e-154	5.84294e-153	0.864823	1.14676	0.833333	26.462	0.765584	0.600407	5	0.283645
TUBGCP2	3.06514e-125	7.74057e-124	1.01245	1.00524	0.898148	23.7745	0.765263	0.60659	5	0.343926
FOXJ1	1.32863e-117	2.94913e-116	2.27625	1.00319	0.981481	23.0244	0.765075	0.450919	1	-0.0149276
MSH3	4.03081e-155	1.80681e-153	0.762285	1.25619	0.777778	26.5069	0.764949	0.646573	5	0.530021
GCC2	4.02639e-112	8.08132e-111	1.51547	0.898282	0.962963	22.4706	0.764862	0.606114	5	0.370492
ULK4	5.53565e-201	8.27119e-199	0.546889	1.27246	0.705247	30.2251	0.764778	0.612644	1	-0.0539701
PDE4DIP	7.21766e-153	3.07313e-151	0.778725	1.30982	0.765432	26.3108	0.764777	0.707091	5	0.885733
NBEA	3.60483e-134	1.05958e-132	0.944384	1.1046	0.853395	24.6227	0.764704	0.612093	5	0.354166
CYP4B1	2.16876e-108	3.99969e-107	2.59419	0.809249	0.975309	22.0857	0.764678	0.601146	5	0.278787
WDR19	8.17719e-169	4.92371e-167	0.699184	1.20452	0.771605	27.6693	0.764614	0.643543	5	0.429473
IQANK1	1.58969e-161	8.27511e-160	0.679524	1.17288	0.776235	27.0568	0.764567	0.6556	5	0.471659
CFAP53	1.03387e-120	2.40052e-119	1.96111	1.06754	0.973765	23.3327	0.764399	0.493683	5	0.0936326
NUCB2	2.7093e-107	4.89585e-106	2.77491	0.747361	0.987654	21.9713	0.764382	0.603935	5	0.24469
NUDT4	7.52767e-123	1.81576e-121	1.11789	1.06808	0.884259	23.5423	0.76437	0.654264	5	0.576381
TP53BP1	4.43873e-147	1.6814e-145	0.74349	1.08635	0.819444	25.8	0.763939	0.656453	5	0.468847
TMEM154	3.95512e-158	1.88828e-156	0.727783	1.28504	0.756173	26.7666	0.763923	0.671859	5	0.628679
MDH1B	1.83942e-151	7.65019e-150	0.858585	1.13768	0.833333	26.1876	0.763738	0.576714	5	0.203672
DUSP18	1.30315e-148	5.15414e-147	0.782615	1.10414	0.828704	25.9361	0.763733	0.616874	5	0.327711
P4HTM	3.46246e-113	7.09058e-112	1.6053	0.94497	0.969136	22.5793	0.763652	0.523361	5	0.152856
ZNF440	7.7056e-150	3.13212e-148	0.81692	1.13835	0.810185	26.0448	0.76363	0.617044	1	0.179202
WASHC2A	6.07463e-161	3.08259e-159	0.652368	1.21983	0.756173	27.0072	0.763446	0.695086	5	0.709124
DTX3	6.3955e-177	4.71252e-175	0.59972	1.21265	0.740741	28.3351	0.763435	0.659371	1	0.35559
C7orf57	8.07953e-142	2.79784e-140	0.971875	1.09993	0.875	25.3269	0.763385	0.569823	5	0.218179
SYTL3	1.05761e-178	8.28474e-177	0.640562	1.32934	0.720679	28.4793	0.762757	0.683955	5	0.708512
ARMH4	6.61422e-203	1.04641e-200	0.611154	1.44736	0.688272	30.3711	0.762707	0.664698	5	0.6451
PIH1D2	2.28643e-159	1.11469e-157	0.776887	1.22381	0.783951	26.8728	0.762538	0.621117	5	0.390764
CFAP58	1.69753e-210	3.11284e-208	0.560256	1.38895	0.685185	30.9406	0.76246	0.663119	5	0.570839
TMEM212	1.22047e-216	2.62597e-214	0.59831	1.52245	0.66821	31.394	0.762363	0.668487	5	0.681426
ALMS1	5.60836e-173	3.75527e-171	0.655518	1.26424	0.739198	28.0132	0.762317	0.663074	6	0.555809
TXLNB	6.93789e-254	4.14655e-251	0.501224	1.5776	0.632716	34.0139	0.761846	0.693243	5	0.836185
CCDC189	6.65816e-138	2.13604e-136	0.93787	1.04218	0.878086	24.9689	0.761739	0.585879	5	0.230179
AC007405.3	1.65675e-195	1.99515e-193	0.610929	1.35778	0.695988	29.8055	0.761625	0.61772	1	0.0938144
ANKRD42	1.46497e-172	9.68861e-171	0.593873	1.26225	0.733025	27.979	0.761377	0.6768	5	0.648445
C2orf40	1.51498e-117	3.35814e-116	2.74073	1.08071	0.95679	23.0187	0.76135	0.447988	5	-0.054637
TRIM56	1.30773e-114	2.77304e-113	1.25218	0.974932	0.930556	22.7237	0.761132	0.662693	5	0.596648
CFAP52	1.96807e-129	5.35561e-128	1.22006	1.06194	0.929012	24.1765	0.760973	0.497475	5	0.0497698
ZC2HC1A	1.99301e-135	5.95579e-134	0.920133	1.09452	0.845679	24.7399	0.760821	0.576834	5	0.216995
FAM229B	1.02708e-114	2.18079e-113	1.96318	1.03975	0.976852	22.7343	0.760799	0.467583	5	0.0458349
STAU1	4.79154e-114	1.00157e-112	1.17099	0.980123	0.896605	22.6665	0.760708	0.687222	5	0.722931
SYNGAP1	5.24075e-185	4.69833e-183	0.566514	1.2764	0.70679	28.984	0.760572	0.662521	6	0.656109
C5orf49	6.2441e-113	1.26584e-111	2.33452	1.00995	0.987654	22.5532	0.760536	0.498255	5	0.0953818
SPA17	1.91489e-120	4.43337e-119	1.53257	1.0593	0.947531	23.3063	0.760536	0.474958	5	0.0283321
OSCP1	9.15072e-123	2.20067e-121	1.30636	1.04544	0.936728	23.534	0.760489	0.519361	5	0.125407
ARHGAP39	2.32494e-161	1.19483e-159	0.690764	1.17349	0.763889	27.0427	0.76016	0.635705	1	0.210337
NEK5	6.46026e-124	1.59891e-122	1.40189	1.02576	0.953704	23.6462	0.760036	0.463631	5	-0.0457217
WDR90	9.9096e-144	3.5457e-142	0.857857	1.09974	0.819444	25.4998	0.759902	0.645677	5	0.232101
CCDC69	3.61174e-139	1.18461e-137	0.75814	1.14467	0.804012	25.0851	0.75969	0.645808	5	0.511969
WFDC6	4.2032e-197	5.21746e-195	0.65291	1.53692	0.674383	29.9284	0.75969	0.67362	5	0.763171
SLC22A23	1.6447e-146	6.18659e-145	0.702129	1.20884	0.765432	25.7492	0.759519	0.670887	6	0.664182
REC8	4.77847e-128	1.25587e-126	0.918669	1.10192	0.839506	24.0444	0.759515	0.666235	5	0.610695
KIAA1841	4.10937e-141	1.39313e-139	0.756489	1.11384	0.805556	25.2627	0.759475	0.650254	5	0.461556
FAM227A	6.04303e-132	1.70483e-130	1.07829	1.02965	0.896605	24.4142	0.759323	0.527889	5	0.0453404
MT-ND5	7.17551e-102	1.17914e-100	4.38088	0.48289	1	21.3967	0.759234	0.580621	4	0.185903
RIPOR2	3.79281e-147	1.44011e-145	0.863558	1.18285	0.802469	25.806	0.759201	0.58662	5	0.245753
MORN2	3.85242e-107	6.93049e-106	2.84722	0.960923	0.989198	21.9553	0.759193	0.428276	5	-0.0242491
FUZ	1.4717e-133	4.28679e-132	0.938588	1.1003	0.844136	24.5656	0.759175	0.613359	5	0.382475
TMC4	1.78352e-109	3.37801e-108	1.31547	0.90736	0.947531	22.1983	0.759065	0.588509	5	0.331562
ATXN7L3B	2.38787e-132	6.8564e-131	0.779136	1.13596	0.808642	24.4521	0.759064	0.658453	6	0.550421
KTN1	8.30733e-103	1.38344e-101	2.18136	0.676433	0.99537	21.497	0.759039	0.630917	5	0.362303
C11orf16	1.05821e-135	3.19183e-134	1.04133	1.09826	0.868827	24.7654	0.759008	0.545738	5	0.129567
HSPBP1	4.75893e-113	9.68409e-112	1.38856	0.98076	0.941358	22.5652	0.759006	0.559806	5	0.252846
C1orf158	1.26405e-149	5.06155e-148	0.822261	1.13761	0.813272	26.0258	0.759003	0.593039	5	0.2596
WDR35	4.72112e-192	5.21813e-190	0.539279	1.32696	0.685185	29.5377	0.758842	0.686266	6	0.696374
DMD	7.21421e-182	5.97004e-180	0.585735	1.33355	0.697531	28.7338	0.758796	0.692846	5	0.74731
STMND1	6.30266e-142	2.18723e-140	0.88484	1.0787	0.845679	25.3367	0.758239	0.574579	5	0.191701
MUC16	3.4321e-103	5.75716e-102	2.5235	0.823365	0.984568	21.538	0.757707	0.62414	4	0.461264
BSCL2	6.86249e-183	5.76771e-181	0.64084	1.52117	0.666667	28.8155	0.757702	0.620064	1	0.249363
STK36	1.67809e-163	9.37e-162	0.626876	1.17415	0.739198	27.2242	0.757687	0.675855	6	0.576732
C10orf95	3.32716e-163	1.83244e-161	0.67226	1.22797	0.740741	27.1991	0.757514	0.656838	1	0.290207
LIG3	7.64591e-199	1.02818e-196	0.512286	1.49764	0.649691	30.0618	0.757454	0.687093	6	0.986676
MPDZ	1.65577e-182	1.38441e-180	0.577197	1.26333	0.703704	28.7849	0.757349	0.652828	5	0.454129
FBXO15	3.18208e-162	1.70031e-160	0.708608	1.2344	0.75463	27.1161	0.757305	0.607479	5	0.321005
CEP83	3.14013e-144	1.13615e-142	0.763979	1.08583	0.79784	25.5447	0.757117	0.616	1	0.113092
CASC2	3.08693e-190	3.23467e-188	0.54462	1.28557	0.692901	29.396	0.756995	0.670278	5	0.609336
C12orf75	4.70497e-113	9.58638e-112	1.90588	1.0408	0.955247	22.5657	0.756877	0.494466	5	0.085547
PTPRF	2.88496e-108	5.30234e-107	1.37895	0.922301	0.938272	22.0728	0.756392	0.578817	5	0.287563
HSP90AA1	2.59461e-99	4.0571e-98	4.98313	0.469674	0.998457	21.1202	0.75588	0.444322	5	-0.0350057
C11orf88	1.15323e-110	2.25298e-109	2.42788	1.01655	0.978395	22.3211	0.755658	0.44315	5	-0.0424035
LINC02345	6.21967e-196	7.54638e-194	0.557806	1.34031	0.679012	29.8383	0.755633	0.643422	5	0.455437
DNAL1	2.01398e-126	5.15867e-125	1.02275	1.04962	0.878086	23.8886	0.755629	0.559712	5	0.18908
SPEF1	1.09815e-125	2.78629e-124	1.08999	1.00513	0.908951	23.8176	0.75558	0.531472	1	-0.0313699
NAT1	1.03053e-153	4.45838e-152	0.628487	1.19093	0.742284	26.3846	0.755417	0.643785	5	0.43969
CCDC60	7.45743e-174	5.07766e-172	0.586406	1.29141	0.700617	28.0851	0.755229	0.681779	5	0.717993
GNA11	1.26303e-122	3.01949e-121	0.822544	1.00215	0.851852	23.5203	0.755121	0.650893	6	0.452803
EXPH5	2.99922e-123	7.31094e-122	0.854727	1.03994	0.845679	23.5813	0.755091	0.687175	5	0.680075
RGS22	5.73813e-153	2.44963e-151	0.786191	1.15173	0.782407	26.3195	0.754961	0.5697	5	0.131382
WHRN	1.47733e-169	9.13398e-168	0.603053	1.22545	0.709877	27.731	0.754854	0.66114	1	0.280733
RIBC2	8.57037e-155	3.82044e-153	0.702436	1.12022	0.771605	26.4785	0.754851	0.612131	1	0.0750005
RUVBL2	7.78124e-105	1.35162e-103	1.82146	0.936413	0.972222	21.7127	0.754815	0.522289	5	0.172029
AC084033.3	4.87822e-123	1.18376e-121	1.24743	1.06225	0.890432	23.5607	0.754805	0.548052	5	0.169283
CDS1	1.26626e-105	2.23319e-104	1.67841	0.933555	0.976852	21.796	0.75468	0.461121	5	0.038432
FAM27C	3.59687e-162	1.9156e-160	0.663799	1.17171	0.740741	27.1116	0.754272	0.654	5	0.41721
RHPN1	1.68241e-128	4.47266e-127	0.864883	1.01931	0.847222	24.0877	0.754245	0.60168	5	0.29011
ZNF664	9.80546e-112	1.95347e-110	1.07833	0.954465	0.907407	22.431	0.754161	0.638705	5	0.508842
SHROOM3	9.03051e-122	2.13049e-120	0.967489	1.03095	0.861111	23.4367	0.753809	0.61078	5	0.346593
IFT22	1.9607e-109	3.70489e-108	1.50826	0.994516	0.944444	22.194	0.753589	0.543137	5	0.221645
CARS	1.03904e-113	2.15513e-112	1.17709	0.991737	0.904321	22.6324	0.753572	0.589629	5	0.302578
AFDN	1.40958e-103	2.38933e-102	1.47511	0.858914	0.976852	21.5792	0.753499	0.623653	5	0.425115
C21orf58	1.35425e-121	3.181e-120	1.23501	1.04014	0.893519	23.4194	0.753434	0.523952	5	0.0958709
GTF2I	1.88165e-100	3.01532e-99	1.73523	0.77757	0.979938	21.2438	0.753413	0.638689	5	0.44194
DAW1	2.57929e-155	1.16263e-153	0.708271	1.16477	0.760802	26.5238	0.753353	0.593866	5	0.228947
CLUAP1	1.03006e-112	2.08296e-111	1.3055	0.972595	0.938272	22.5311	0.753037	0.479558	5	0.00200123
NCALD	3.188e-188	3.11787e-186	0.512914	1.35891	0.66358	29.238	0.752906	0.695183	5	0.829906
RPGRIP1L	4.81848e-162	2.54104e-160	0.588793	1.18487	0.722222	27.1008	0.752838	0.643977	6	0.496055
RSPH10B	2.4481e-278	2.82179e-275	0.418957	1.59551	0.583333	35.6295	0.752756	0.677427	1	0.478311
ST3GAL6	1.16611e-178	9.09055e-177	0.613985	1.37115	0.683642	28.4759	0.752661	0.649431	5	0.550294
PPP1R42	9.69392e-140	3.22538e-138	0.831435	1.08045	0.817901	25.1374	0.752534	0.560151	5	0.131185
COQ4	1.10747e-103	1.88118e-102	1.38279	0.868866	0.955247	21.5903	0.752435	0.566088	1	0.280351
LINC01571	4.595e-152	1.94109e-150	0.798191	1.1754	0.766975	26.2404	0.752205	0.566112	5	0.12904
TUBB4B	1.24001e-96	1.8545e-95	4.42428	0.657486	0.998457	20.8267	0.752129	0.411559	5	-0.0850293
ENKD1	2.89495e-144	1.04979e-142	0.704196	1.11122	0.774691	25.5479	0.752013	0.617368	6	0.422987
LRRIQ1	8.9446e-105	1.55036e-103	2.35975	0.945521	0.99537	21.7063	0.751972	0.42215	5	-0.0794137
ZNF273	3.50529e-136	1.07334e-134	0.800987	1.00619	0.822531	24.8099	0.751869	0.56768	5	0.0893709
SLC23A1	3.20767e-268	2.72432e-265	0.467492	1.69633	0.583333	34.9701	0.751642	0.702428	5	1.03761
NEK1	1.54966e-138	5.02146e-137	0.676915	1.05031	0.785494	25.0271	0.75128	0.621165	5	0.313045
DGKH	8.6886e-125	2.17377e-123	0.796385	1.03933	0.817901	23.7307	0.751169	0.646798	5	0.449567
MAK	4.71166e-192	5.21813e-190	0.502409	1.29802	0.660494	29.5378	0.75112	0.67774	6	0.717888
FAM104B	7.48434e-123	1.80801e-121	0.913221	1.0669	0.828704	23.5425	0.751074	0.584127	5	0.25379
TNRC6B	7.50981e-109	1.40261e-107	1.08557	0.930942	0.899691	22.1336	0.751057	0.637684	5	0.466392
TUSC3	2.57781e-105	4.51662e-104	1.44731	0.94298	0.936728	21.7634	0.750891	0.504439	5	0.094991
FOCAD	1.47162e-152	6.24936e-151	0.636519	1.13938	0.736111	26.2837	0.750878	0.628366	5	0.316473
NGRN	1.58825e-127	4.12714e-126	0.836379	1.24806	0.75463	23.9945	0.750868	0.694634	1	0.76608
PIH1D3	6.35573e-138	2.04716e-136	0.842249	1.06444	0.819444	24.9707	0.750811	0.535463	5	0.0369796
C5AR1	6.12925e-165	3.47045e-163	0.575366	1.19252	0.70679	27.3454	0.750742	0.688802	5	0.683903
C11orf49	8.77114e-138	2.79723e-136	0.668611	1.09926	0.768519	24.9579	0.750295	0.654656	5	0.503039
AC078864.2	5.2649e-157	2.4626e-155	0.744809	1.24237	0.734568	26.6699	0.750129	0.60709	5	0.332683
ANKRD37	1.21377e-113	2.5111e-112	1.19513	0.957099	0.901235	22.6256	0.750121	0.508022	1	-0.17647
PLEKHB1	9.6713e-144	3.46813e-142	0.70391	1.13617	0.765432	25.5007	0.749893	0.598961	5	0.267837
BTBD3	8.73846e-169	5.2421e-167	0.531251	1.22924	0.685185	27.6669	0.749639	0.655006	6	0.59439
MAP1B	8.6818e-141	2.92481e-139	0.836939	1.12411	0.78858	25.2331	0.74953	0.598862	5	0.282753
LRIG1	1.70699e-126	4.37928e-125	0.768111	1.11595	0.783951	23.8955	0.749522	0.648538	6	0.545408
TNFRSF19	6.51906e-135	1.93735e-133	0.722345	1.10744	0.777778	24.692	0.749332	0.639591	5	0.443043
AZIN1	1.15347e-100	1.85394e-99	1.54673	0.891742	0.95679	21.2668	0.749119	0.533338	5	0.184309
PSPH	2.00582e-168	1.19439e-166	0.600961	1.3736	0.669753	27.6369	0.749067	0.687066	1	0.621794
PRRC2B	1.45876e-113	3.01023e-112	0.884269	1.02354	0.837963	22.6175	0.748886	0.70756	6	0.716359
PNMA1	7.80638e-146	2.88926e-144	0.630963	1.14004	0.742284	25.6888	0.748851	0.600153	6	0.349787
SECISBP2L	1.67757e-114	3.54795e-113	0.881931	1.02538	0.828704	22.7127	0.748716	0.68216	5	0.678271
C11orf97	4.67098e-113	9.52916e-112	1.59621	1.03619	0.945988	22.5661	0.74867	0.439761	5	-0.0520516
FBXO36	3.25044e-172	2.12358e-170	0.537555	1.23723	0.685185	27.9505	0.748396	0.654075	5	0.534753
UPF1	2.46007e-115	5.27199e-114	0.881049	1.07534	0.816358	22.7969	0.748255	0.667039	6	0.588202
EP400	6.19481e-140	2.06968e-138	0.629638	1.15234	0.731481	25.1552	0.748243	0.685732	6	0.721394
RSPH14	1.63385e-155	7.44786e-154	0.687475	1.20507	0.733025	26.5409	0.748205	0.599266	5	0.28362
CROCC2	3.04232e-171	1.94047e-169	0.61866	1.12805	0.700617	27.8705	0.748157	0.649971	5	0.287273
SERPINI2	1.57635e-207	2.73522e-205	0.476971	1.38219	0.626543	30.7192	0.747844	0.675323	6	0.824483
TMEM131	8.206e-129	2.207e-127	0.672876	1.10061	0.765432	24.1174	0.747754	0.676882	5	0.660355
RCAN3	1.6312e-118	3.67123e-117	0.823077	0.990295	0.83642	23.1151	0.747715	0.615309	5	0.345379
MYCBP	1.79298e-109	3.39194e-108	1.02325	0.942071	0.887346	22.1981	0.747602	0.550985	5	0.161939
AP001207.3	1.88982e-213	3.90974e-211	0.47556	1.55667	0.603395	31.1594	0.747483	0.693567	6	1.14922
ABCC6	8.52327e-213	1.74101e-210	0.448691	1.48505	0.609568	31.1111	0.747439	0.700911	5	0.956222
TEAD1	3.74923e-128	9.88583e-127	0.700252	1.09329	0.771605	24.0545	0.747318	0.69426	4	0.747454
CHST9	1.78674e-97	2.70474e-96	1.83056	0.848092	0.942901	20.9193	0.747284	0.611837	5	0.312772
XPNPEP3	1.38595e-147	5.33771e-146	0.560746	1.12751	0.720679	25.845	0.747167	0.6544	6	0.629641
MTSS1	6.33512e-150	2.58156e-148	0.606988	1.2264	0.70679	26.0523	0.746965	0.676026	5	0.664747
PTGES3	1.41974e-93	2.02567e-92	2.19711	0.65572	0.99537	20.4865	0.746838	0.570885	5	0.218425
ODF2L	1.8109e-96	2.69829e-95	1.72342	0.804304	0.983025	20.8085	0.746833	0.567841	5	0.220245
PPP1R16A	9.93009e-107	1.77652e-105	1.09741	0.923584	0.899691	21.9122	0.746768	0.598329	5	0.325407
VSTM2L	6.24708e-117	1.37155e-115	0.936013	1.04749	0.833333	22.9572	0.746767	0.594935	5	0.289603
RAD9A	5.37833e-137	1.67549e-135	0.643262	1.09202	0.748457	24.8852	0.746649	0.684449	5	0.522138
ELK3	5.23177e-121	1.22001e-119	0.814851	1.02516	0.820988	23.3618	0.746583	0.633726	5	0.431394
IFI6	2.18442e-95	3.20745e-94	3.37387	0.832246	0.945988	20.6888	0.746361	0.629943	3	0.297593
CPLANE1	7.93438e-131	2.19995e-129	0.710254	1.07719	0.766975	24.3087	0.746148	0.666125	5	0.564124
MUC15	4.35947e-109	8.18009e-108	1.03541	0.958018	0.882716	22.1581	0.746112	0.564058	5	0.195718
CCDC33	1.49903e-110	2.92148e-109	1.32522	0.975426	0.927469	22.3094	0.746105	0.497558	5	0.0546052
FAM95C	1.71379e-186	1.59858e-184	0.533572	1.28864	0.649691	29.1016	0.745841	0.652795	5	0.451749
SPTLC2	1.60837e-118	3.62491e-117	0.758848	1.07192	0.79321	23.1157	0.745841	0.685235	5	0.717632
IFT80	1.94527e-144	7.08595e-143	0.600982	1.06399	0.739198	25.5635	0.74564	0.621678	5	0.278461
BCL2L1	3.32379e-100	5.31049e-99	1.24836	0.865145	0.941358	21.217	0.745548	0.643558	4	0.465359
MYO1E	4.96113e-128	1.30175e-126	0.694917	1.12523	0.760802	24.0428	0.745531	0.683262	6	0.772607
ODF2	1.06312e-137	3.36382e-136	0.628561	1.06149	0.75	24.9502	0.745494	0.633499	6	0.476551
ERGIC3	8.8113e-93	1.22787e-91	2.18272	0.676895	0.990741	20.3974	0.745451	0.504265	5	0.138989
WNK1	1.30219e-108	2.4209e-107	0.884084	0.952209	0.856481	22.1087	0.74544	0.667553	5	0.597719
AL022068.1	2.22277e-218	4.98179e-216	0.459777	1.46419	0.601852	31.5212	0.745436	0.672237	6	0.733092
ATXN2	1.43453e-113	2.96402e-112	0.806183	0.942985	0.844136	22.6182	0.745156	0.645346	5	0.442303
CFLAR	5.36256e-97	8.06484e-96	1.42159	0.83334	0.966049	20.8668	0.745154	0.66948	4	0.581183
STX2	3.04237e-163	1.68133e-161	0.54789	1.15767	0.697531	27.2024	0.745077	0.631525	5	0.369984
TUBA1A	8.07149e-95	1.17766e-93	3.44653	0.900814	0.986111	20.6257	0.744923	0.389468	5	-0.131718
SS18	1.60844e-116	3.51223e-115	0.721459	0.969304	0.814815	22.916	0.744859	0.666718	6	0.557952
PITPNM1	2.47187e-116	5.36858e-115	0.816368	0.947184	0.841049	22.8973	0.744758	0.613691	6	0.322779
SRGAP3	5.35541e-131	1.49e-129	0.726248	1.10738	0.760802	24.3248	0.744745	0.647164	5	0.483119
SIX1	2.17608e-114	4.59024e-113	0.803657	1.01132	0.820988	22.7013	0.744739	0.667636	5	0.618721
C11orf74	3.65689e-115	7.80571e-114	1.01937	1.00677	0.856481	22.7796	0.744698	0.536022	5	0.0922122
TTLL5	5.19792e-163	2.82421e-161	0.507873	1.2308	0.66821	27.1827	0.744602	0.629916	6	0.577278
METTL7A	4.46687e-101	7.22988e-100	1.37342	0.921113	0.929012	21.3112	0.744526	0.510261	5	0.0892896
PTPRN2	6.74508e-117	1.47888e-115	0.791503	1.0064	0.819444	22.9538	0.744357	0.607716	5	0.332201
ANKRD18B	4.69359e-269	4.2078e-266	0.409408	1.57487	0.563272	35.0249	0.744163	0.686665	1	0.5929
PLXNB1	8.05219e-109	1.50152e-107	0.944604	0.90378	0.873457	22.1304	0.744157	0.624141	5	0.361626
KIAA0232	4.92694e-124	1.22317e-122	0.730993	1.1148	0.762346	23.6576	0.744143	0.666757	6	0.626352
MSI2	1.51905e-100	2.43667e-99	1.15583	0.899485	0.915123	21.2538	0.744039	0.611878	5	0.403618
ALS2CR12	1.00324e-225	2.99802e-223	0.44106	1.45336	0.595679	32.0528	0.743861	0.685645	5	0.815852
TEKT1	2.13394e-103	3.60579e-102	1.80354	0.982164	0.970679	21.56	0.743846	0.452305	5	0.00645471
LIMS1	2.14909e-110	4.17327e-109	0.885634	0.978394	0.83642	22.2932	0.743734	0.648912	6	0.440749
BCO2	2.68813e-140	9.03716e-139	0.653352	1.03603	0.75463	25.1883	0.743335	0.599121	5	0.194538
SFXN3	2.50898e-135	7.4838e-134	0.665936	1.04339	0.757716	24.7306	0.743334	0.608321	5	0.242348
HHLA2	6.03089e-220	1.49724e-217	0.462787	1.50467	0.595679	31.6353	0.74329	0.685925	5	0.859314
C9orf135	2.95159e-105	5.15475e-104	1.54026	0.975778	0.950617	21.7572	0.743219	0.502799	5	0.104647
MTF1	2.28267e-137	7.1804e-136	0.582308	1.16575	0.709877	24.9196	0.743135	0.640835	6	0.582438
TEKT4	2.89501e-137	9.05365e-136	0.697174	0.985253	0.773148	24.9101	0.742989	0.604576	5	0.0462499
CLSTN1	7.43702e-100	1.17543e-98	1.06359	0.867589	0.912037	21.1791	0.742891	0.619068	5	0.401625
ENPP5	2.52238e-149	1.00751e-147	0.574968	1.1808	0.700617	25.9993	0.742883	0.637661	5	0.418224
PPP1R14C	1.04299e-126	2.68433e-125	0.715409	1.00945	0.790123	23.916	0.742883	0.581773	5	0.159431
MT-ND4L	2.19215e-90	2.93566e-89	4.41912	0.720445	0.976852	20.1258	0.742793	0.536251	4	0.0335978
ATP2A2	7.73804e-93	1.07925e-91	1.68016	0.759731	0.986111	20.4038	0.742704	0.537422	5	0.182459
P4HA2	1.60691e-120	3.72567e-119	0.785504	1.03639	0.794753	23.3138	0.742643	0.606423	5	0.304678
TSPYL4	6.17806e-172	4.00383e-170	0.475214	1.24126	0.651235	27.9275	0.74258	0.685119	5	0.731299
AC009502.1	6.89258e-203	1.07986e-200	0.529625	1.44411	0.614198	30.3698	0.742532	0.668807	5	0.723294
SYAP1	4.08178e-99	6.37018e-98	1.09063	0.867484	0.901235	21.0988	0.742343	0.607234	5	0.378351
CYB5D1	5.71041e-143	2.00324e-141	0.629376	1.13181	0.723765	25.4311	0.742327	0.629225	5	0.381485
GLB1L	2.82849e-185	2.56424e-183	0.477957	1.30245	0.634259	29.0052	0.742304	0.663411	6	0.657867
DNAJB13	5.92011e-119	1.34175e-117	0.935081	0.968626	0.856481	23.1588	0.742206	0.518946	5	0.0124687
COL21A1	8.74764e-170	5.45022e-168	0.544486	1.23147	0.66358	27.7499	0.742194	0.655407	5	0.503299
KCNE1	1.37777e-151	5.75987e-150	0.592094	1.10862	0.71142	26.1986	0.742183	0.628928	5	0.357612
ZNF609	3.04558e-132	8.71391e-131	0.619265	1.16689	0.719136	24.4422	0.742109	0.666772	6	0.706824
KIFAP3	3.26365e-141	1.11109e-139	0.58286	1.13948	0.71142	25.2718	0.742033	0.655735	5	0.510952
TTLL9	8.00998e-152	3.35732e-150	0.599389	1.04145	0.720679	26.2193	0.741839	0.609967	5	0.178099
IQCA1	6.05653e-129	1.63162e-127	0.724683	1.05992	0.768519	24.13	0.741663	0.591793	5	0.227339
MRNIP	1.18137e-127	3.07976e-126	0.69234	0.963548	0.79321	24.0068	0.741637	0.602992	5	0.251257
CCDC24	7.12078e-120	1.6392e-118	0.732055	0.937675	0.804012	23.25	0.741437	0.538725	1	-0.230017
ERICH5	9.88715e-139	3.22321e-137	0.652474	1.19794	0.714506	25.045	0.741391	0.61698	5	0.36523
VPS35	2.38123e-95	3.49327e-94	1.28757	0.831584	0.941358	20.6846	0.741348	0.543742	5	0.219458
INTU	1.03956e-128	2.79124e-127	0.667419	0.955014	0.774691	24.1076	0.741345	0.625952	5	0.126525
IFT43	1.17488e-96	1.75873e-95	1.51527	0.907246	0.945988	20.8293	0.741298	0.488474	5	0.0733993
LMLN	7.59115e-158	3.57138e-156	0.53515	1.14412	0.680556	26.7423	0.741151	0.661018	5	0.502909
ZFHX2	1.9403e-195	2.3193e-193	0.447977	1.32835	0.612654	29.8002	0.740954	0.643868	6	0.74784
VPS13C	1.71446e-105	3.01048e-104	0.884314	0.931517	0.842593	21.7821	0.740822	0.677426	5	0.63191
RIIAD1	1.13103e-115	2.43677e-114	1.09963	1.00344	0.861111	22.8309	0.740767	0.494062	5	-0.0209476
TEX26	4.19524e-151	1.73142e-149	0.866932	1.36544	0.689815	26.1561	0.740719	0.607434	5	0.392461
HECTD1	1.10567e-94	1.60595e-93	1.28977	0.818741	0.949074	20.6105	0.740713	0.662696	5	0.56663
PKD1	4.59714e-124	1.14305e-122	0.681353	0.962941	0.770062	23.6605	0.74068	0.581688	1	-0.112522
CLBA1	1.21537e-156	5.60353e-155	0.531115	1.12061	0.682099	26.6385	0.740649	0.62311	1	0.0686894
IFI44L	1.43832e-109	2.73382e-108	1.33463	1.11112	0.820988	22.208	0.740591	0.667921	3	0.653446
MFSD6	3.31616e-108	6.08793e-107	0.808677	0.981874	0.824074	22.0665	0.740556	0.651521	6	0.503908
TMEM173	8.98423e-98	1.36515e-96	1.15567	0.875166	0.91821	20.9521	0.74054	0.57393	5	0.235708
KIF2A	3.70733e-129	1.00378e-127	0.643339	1.20154	0.708333	24.1503	0.740435	0.704364	6	1.00075
C9orf72	1.25945e-132	3.63572e-131	0.645283	1.0307	0.748457	24.4782	0.74039	0.621384	5	0.296837
CCDC173	6.95206e-110	1.32607e-108	1.16795	0.958391	0.896605	22.2406	0.740258	0.502196	5	0.0152626
KNDC1	8.22689e-147	3.10907e-145	0.590503	0.96681	0.731481	25.7761	0.740159	0.592663	5	0.0646061
CTNNAL1	3.26798e-123	7.95407e-122	0.740544	1.06106	0.763889	23.5776	0.740096	0.630253	5	0.422441
GIPR	3.45644e-155	1.55367e-153	0.56957	1.11382	0.688272	26.5127	0.740015	0.62832	5	0.281738
DIXDC1	1.27148e-174	8.9208e-173	0.483115	1.27262	0.638889	28.1479	0.740011	0.661761	6	0.586646
GOLGB1	1.04774e-95	1.54971e-94	1.18707	0.873752	0.915123	20.7242	0.740007	0.715253	6	0.617068
KCTD1	1.18576e-123	2.92131e-122	0.680131	1.13274	0.740741	23.6205	0.739969	0.690702	5	0.776897
TTBK2	1.17262e-153	5.05951e-152	0.540082	1.17205	0.679012	26.3797	0.739801	0.661764	5	0.536985
CFAP300	1.96295e-104	3.37698e-103	1.42806	0.960208	0.936728	21.6701	0.739759	0.452634	5	-0.0554305
AKAP6	5.73085e-179	4.53327e-177	0.492703	1.2355	0.641975	28.5008	0.73939	0.652634	5	0.485097
PFN2	9.36432e-95	1.36506e-93	1.31622	0.865115	0.924383	20.6185	0.739102	0.54049	5	0.180902
ATP2C2	2.44407e-108	4.49714e-107	0.843596	1.00735	0.808642	22.0803	0.739032	0.65657	1	0.364084
SPAG16	9.55493e-97	1.43297e-95	1.40106	0.905611	0.932099	20.8392	0.738907	0.473946	5	0.0178825
CCDC66	5.07161e-136	1.54125e-134	0.59278	1.07251	0.716049	24.795	0.738815	0.65898	5	0.503793
TSPOAP1	1.96578e-189	1.99508e-187	0.43689	1.24153	0.614198	29.333	0.738815	0.673341	1	0.330402
PRR7	3.65432e-131	1.01848e-129	0.658701	1.08805	0.731481	24.3405	0.738781	0.65004	5	0.401424
C10orf67	1.20304e-185	1.10303e-183	0.460811	1.24399	0.62963	29.0346	0.738774	0.649467	5	0.449263
CFAP126	5.22411e-100	8.29739e-99	1.78832	0.971461	0.967593	21.1958	0.738594	0.435951	5	-0.0213959
CFAP298	1.13717e-91	1.56042e-90	1.76903	0.858962	0.973765	20.272	0.738558	0.457542	5	0.0245801
HIPK3	3.32274e-107	5.99096e-106	0.792638	0.913253	0.833333	21.962	0.738507	0.647156	5	0.450872
ZMYND10	4.49263e-94	6.473e-93	2.31803	0.915492	0.996914	20.5425	0.738292	0.47415	5	0.0586844
LAMC2	2.40874e-112	4.84058e-111	0.832905	1.01334	0.799383	22.4934	0.738278	0.657919	4	0.497162
LRRC34	9.6731e-130	2.65017e-128	0.690196	0.946318	0.785494	24.2058	0.738271	0.537673	5	-0.0544603
STAT1	2.99188e-94	4.33004e-93	1.47424	0.897214	0.91821	20.5622	0.738248	0.628391	4	0.455296
MORN3	3.70371e-132	1.05409e-130	0.670541	0.999482	0.757716	24.4342	0.73766	0.598176	5	0.220427
CCDC181	1.05912e-128	2.83903e-127	0.746472	1.02335	0.765432	24.1069	0.737648	0.562206	5	0.0673426
DHX32	1.44503e-133	4.21673e-132	0.611104	1.28945	0.674383	24.5664	0.737544	0.69916	6	1.08854
FAM174A	2.01035e-91	2.74691e-90	1.64311	0.869093	0.950617	20.2439	0.737359	0.492331	5	0.0988747
SLC12A7	3.69387e-110	7.09618e-109	0.794135	0.952987	0.814815	22.269	0.737329	0.646159	1	0.309609
CCDC81	3.29658e-189	3.30415e-187	0.577876	1.50288	0.606481	29.3154	0.73724	0.652558	5	0.659667
TMEM68	1.10856e-127	2.89464e-126	0.596332	1.07089	0.728395	24.0094	0.737232	0.634119	5	0.396456
UBE2H	1.88556e-93	2.68081e-92	1.21673	0.839482	0.927469	20.4727	0.737153	0.648706	5	0.526388
SNX29	8.98427e-160	4.44721e-158	0.480353	1.2114	0.645062	26.9074	0.736813	0.667646	6	0.700576
TAX1BP1	8.6679e-87	1.07595e-85	1.98612	0.691242	0.984568	19.711	0.73669	0.500917	5	0.113156
MRPS31	3.92534e-92	5.41858e-91	2.10894	0.930445	0.973765	20.3242	0.736688	0.408125	5	-0.0638787
C16orf71	5.15409e-144	1.85651e-142	0.587345	1.04943	0.708333	25.5254	0.736543	0.611643	5	0.255868
CD38	2.33283e-110	4.52463e-109	0.843669	1.04163	0.796296	22.2896	0.736388	0.657613	6	0.59449
UFC1	5.12927e-86	6.26579e-85	2.53943	0.697317	0.986111	19.6209	0.736366	0.441197	5	0.00775252
IGFBP5	4.46563e-101	7.22988e-100	1.43825	0.977012	0.896605	21.3112	0.736274	0.481347	5	-0.0229997
SSBP4	1.39399e-93	1.99069e-92	1.36886	0.862624	0.953704	20.4874	0.736134	0.482344	5	0.0319714
TEKT2	1.01768e-102	1.69128e-101	1.26291	0.915427	0.927469	21.4876	0.73609	0.497881	5	-0.0173401
TMEM107	4.44732e-112	8.91509e-111	0.827872	0.904086	0.842593	22.4662	0.735969	0.529102	5	0.0145129
HMGXB3	4.00948e-138	1.29661e-136	0.521809	1.11743	0.679012	24.9892	0.735876	0.67064	6	0.386892
NME7	2.93723e-110	5.67641e-109	0.814653	0.913869	0.83179	22.2792	0.735431	0.55009	5	0.0757508
PPP1R36	1.53882e-159	7.54768e-158	0.525693	1.21325	0.654321	26.8875	0.735381	0.630409	5	0.405542
SPATA6L	1.9362e-165	1.10016e-163	0.46373	1.17596	0.634259	27.3874	0.735058	0.675192	5	0.611061
CAPS2	5.38021e-132	1.52317e-130	0.654231	1.00887	0.734568	24.4189	0.734973	0.592017	5	0.161488
TCTN2	5.13791e-178	3.92941e-176	0.459412	1.26	0.618827	28.4238	0.734901	0.662261	5	0.591937
CES4A	6.29468e-118	1.403e-116	0.802975	0.939284	0.79784	23.0567	0.734665	0.539319	5	-0.0281113
HRASLS2	6.62752e-102	1.09131e-100	1.22434	0.968143	0.844136	21.4004	0.734531	0.698526	4	0.633721
PIFO	1.68884e-90	2.26352e-89	2.7511	0.932264	0.986111	20.1387	0.73425	0.355247	5	-0.122481
AK8	9.14559e-142	3.16022e-140	0.580807	1.05346	0.705247	25.322	0.734209	0.592342	5	0.165684
LRRC61	1.19206e-127	3.10263e-126	0.672629	1.12931	0.714506	24.0064	0.73407	0.623397	5	0.410555
CACNG6	1.91151e-158	9.2078e-157	0.539981	1.2012	0.654321	26.7937	0.733769	0.622839	5	0.340569
DYNLT1	1.45283e-83	1.7038e-82	2.81154	0.549759	0.990741	19.3317	0.733758	0.49922	5	0.0790798
SETX	7.83828e-112	1.56349e-110	0.690639	1.02074	0.762346	22.441	0.733745	0.705786	4	0.800383
FYB2	3.87694e-113	7.92931e-112	0.788301	1.00773	0.776235	22.5743	0.733735	0.596397	5	0.244041
CERKL	2.25161e-170	1.41378e-168	0.482091	1.20176	0.631173	27.7987	0.733583	0.645208	5	0.444302
LRRC4	7.79869e-111	1.52542e-109	0.759714	1.04781	0.779321	22.3386	0.733519	0.630374	6	0.512836
CMIP	3.24589e-103	5.45047e-102	0.791665	0.923877	0.816358	21.5406	0.733447	0.665387	5	0.564544
MARCH6	1.4855e-93	2.11762e-92	1.02064	0.836268	0.895062	20.4843	0.73331	0.574284	5	0.229787
TTC21B	1.68814e-161	8.75935e-160	0.507952	1.14532	0.643519	27.0546	0.733279	0.656995	5	0.334388
AHSA1	3.53136e-89	4.61795e-88	1.33366	0.802926	0.945988	19.9876	0.733277	0.526918	5	0.158836
SETD2	4.20706e-116	9.12492e-115	0.630521	1.02575	0.736111	22.8741	0.733265	0.677268	6	0.719838
EVI5	6.63837e-121	1.54579e-119	0.605689	1.03783	0.728395	23.3516	0.732763	0.664019	5	0.559311
BCAS3	6.82649e-148	2.64805e-146	0.514924	1.17337	0.658951	25.8723	0.732739	0.643205	5	0.488512
EPN2	3.18922e-130	8.81239e-129	0.516155	1.08198	0.688272	24.2515	0.732703	0.673498	6	0.780474
CIR1	3.37543e-90	4.50159e-89	1.16924	0.816565	0.919753	20.1044	0.732643	0.57344	5	0.274288
CIPC	1.04978e-117	2.33338e-116	0.635218	1.00488	0.751543	23.0346	0.73264	0.625789	6	0.368004
CABIN1	3.29382e-127	8.53169e-126	0.564241	1.00597	0.709877	23.9641	0.732565	0.651118	1	0.199366
HLA-DRB5	3.46435e-121	8.09035e-120	1.22839	1.49873	0.689815	23.3794	0.732385	0.650775	3	0.895915
ABI2	1.29694e-104	2.24557e-103	0.777176	0.88931	0.825617	21.6892	0.732342	0.581959	5	0.178278
C22orf15	4.07694e-100	6.49453e-99	1.38362	0.94276	0.92284	21.2074	0.732127	0.430054	5	-0.124223
ANKRD26	2.77482e-139	9.13823e-138	0.551774	1.0998	0.674383	25.0956	0.731923	0.648378	1	0.206755
LRRC56	3.83683e-161	1.95315e-159	0.462302	1.16889	0.631173	27.0242	0.731691	0.636104	6	0.587003
CFAP161	3.06736e-158	1.46878e-156	0.490724	1.15665	0.648148	26.7761	0.731529	0.607224	6	0.384639
DUOX1	3.73718e-90	4.96762e-89	1.14849	0.843762	0.912037	20.0994	0.731493	0.646591	5	0.451008
KIAA1522	3.24453e-89	4.24631e-88	1.13242	0.825473	0.92284	19.9918	0.731483	0.678306	6	0.466425
C9orf116	5.0248e-88	6.45069e-87	2.60501	0.908681	0.992284	19.8546	0.731475	0.405736	5	-0.0433493
DNAAF4	3.26542e-100	5.2224e-99	1.1398	0.87948	0.902778	21.2179	0.731467	0.460543	5	-0.117324
AKAP14	1.36167e-104	2.35259e-103	1.16798	0.936623	0.887346	21.687	0.731443	0.441898	5	-0.15441
CCDC153	8.29177e-99	1.28906e-97	1.26017	0.913619	0.907407	21.0652	0.731424	0.446171	5	-0.112038
TRMT1L	2.44679e-134	7.20508e-133	0.537249	1.12572	0.674383	24.6385	0.731258	0.653288	5	0.509445
KLHDC9	1.0292e-118	2.32607e-117	0.693927	1.01854	0.75463	23.135	0.731154	0.583616	5	0.208646
CCDC151	4.66919e-125	1.16998e-123	0.67946	0.959448	0.753086	23.7568	0.731072	0.575598	5	0.116761
BRD3OS	4.62175e-151	1.90258e-149	0.469803	1.13812	0.648148	26.1524	0.730999	0.579422	6	0.344342
C8orf34	1.03664e-176	7.60373e-175	0.424832	1.1493	0.612654	28.318	0.730354	0.652381	5	0.462809
ADAR	5.39435e-88	6.90314e-87	1.22728	0.812047	0.932099	19.8511	0.73034	0.664258	4	0.531053
SLC44A4	5.4014e-82	6.12526e-81	2.18528	0.649962	0.99537	19.1443	0.730302	0.475381	5	0.0750498
MLF1	2.46052e-91	3.3535e-90	1.37921	0.879532	0.933642	20.2339	0.730297	0.498224	5	0.0816304
KIF9	2.50435e-85	3.0249e-84	1.99148	0.840747	0.984568	19.5401	0.73024	0.462965	5	0.0391905
CCDC57	1.94215e-100	3.10917e-99	0.781258	0.893537	0.810185	21.2423	0.730186	0.565667	1	-0.125289
SF3B2	4.44849e-84	5.25515e-83	1.44484	0.735759	0.955247	19.3927	0.730137	0.586159	5	0.322758
IFT27	4.76744e-88	6.13005e-87	1.49731	0.846047	0.95216	19.8573	0.730038	0.426007	5	-0.0992168
SPATA33	1.36686e-102	2.26923e-101	0.894845	0.891396	0.847222	21.4739	0.729789	0.545203	5	0.101135
PARP14	1.1341e-89	1.49518e-88	1.31802	0.888607	0.907407	20.0442	0.729777	0.629364	4	0.451551
ERCC1	5.57668e-96	8.27122e-95	0.911116	0.927611	0.830247	20.7545	0.729772	0.580604	6	0.184148
ZKSCAN1	4.9086e-89	6.39823e-88	1.17377	0.854408	0.893519	19.9711	0.729737	0.58042	5	0.277018
MT-ND6	2.25244e-84	2.67262e-83	2.3667	0.860826	0.924383	19.4277	0.729276	0.530959	4	0.0806982
LRTOMT	7.05498e-110	1.34411e-108	0.813591	0.926579	0.807099	22.24	0.729244	0.511449	5	-0.0669282
PXN	2.504e-99	3.91921e-98	0.739733	0.875304	0.817901	21.1219	0.729161	0.675262	6	0.592827
TRIM2	8.16266e-90	1.0788e-88	0.992277	0.843146	0.876543	20.0606	0.729144	0.674845	6	0.481185
NQO1	5.93388e-85	7.12463e-84	1.8119	0.822336	0.96142	19.496	0.729113	0.48655	5	0.0313175
RALGAPA2	2.88515e-105	5.04417e-104	0.680032	0.961145	0.771605	21.7583	0.729048	0.643958	6	0.536064
MYCBPAP	5.49731e-148	2.14276e-146	0.544084	1.09045	0.66358	25.8807	0.72897	0.599608	5	0.185497
SMAP2	1.68588e-119	3.86435e-118	0.547959	1.00242	0.717593	23.2129	0.728883	0.593047	6	0.350447
GALNS	7.8732e-124	1.94563e-122	0.575743	1.0168	0.705247	23.6378	0.728879	0.634991	6	0.392615
CASZ1	8.74657e-102	1.43584e-100	0.746579	0.895152	0.804012	21.3874	0.728587	0.63311	6	0.407427
SOAT1	2.27617e-113	4.67904e-112	0.633042	1.00396	0.731481	22.5978	0.728399	0.648284	5	0.471854
PACRG	7.37699e-107	1.32269e-105	0.888635	0.921564	0.83179	21.9258	0.72827	0.497649	5	-0.0604278
KIF6	3.75701e-174	2.59089e-172	0.413073	1.20605	0.600309	28.1094	0.728267	0.659766	5	0.573172
CEP97	3.04857e-146	1.13877e-144	0.499957	1.15302	0.640432	25.7253	0.728256	0.640318	5	0.428319
ANKRD54	3.78865e-106	6.73319e-105	0.701781	0.858179	0.796296	21.8512	0.728068	0.597769	6	-0.013236
GAS8	8.88971e-107	1.59216e-105	0.72919	0.877409	0.799383	21.9173	0.728	0.595681	1	-0.0217767
STYXL1	1.86044e-106	3.31735e-105	0.650043	0.97185	0.751543	21.8836	0.727867	0.654772	5	0.53723
FGF14	5.53793e-123	1.34182e-121	0.771936	1.07639	0.731481	23.5553	0.727768	0.536383	5	0.0243112
CTGF	1.27736e-91	1.7498e-90	1.60675	0.973587	0.868827	20.2662	0.727725	0.627164	5	0.471776
ATG9B	7.7069e-141	2.6018e-139	0.558474	1.0614	0.665123	25.2378	0.727653	0.597681	1	-0.108366
ALKBH5	1.92201e-97	2.9068e-96	0.785138	0.913458	0.810185	20.9158	0.727636	0.610933	6	0.332387
ACYP1	2.43527e-103	4.10208e-102	0.780255	0.847094	0.822531	21.5539	0.727633	0.560173	5	0.0782502
CIB1	2.72264e-79	2.91348e-78	2.89515	0.552628	0.99537	18.8173	0.727574	0.435222	5	-3.0837e-05
TJP3	3.70165e-89	4.83673e-88	1.05488	0.820849	0.885802	19.9852	0.727572	0.600765	5	0.342186
DMKN	1.5425e-84	1.83971e-83	1.58405	0.82524	0.958333	19.4471	0.727551	0.485035	5	0.0776018
STEAP3	3.53497e-118	7.93377e-117	0.615947	1.07461	0.70216	23.0817	0.72735	0.650713	5	0.493555
DDX24	4.14502e-87	5.20051e-86	1.06567	0.811811	0.901235	19.7483	0.727143	0.679527	5	0.641227
SPATA4	5.55012e-151	2.27894e-149	0.496928	1.16287	0.637346	26.1455	0.726629	0.623182	5	0.371274
CCL28	1.29046e-160	6.50754e-159	0.447024	1.28784	0.598765	26.9794	0.726524	0.678897	6	0.87591
TRIP13	4.43553e-114	9.28355e-113	0.755786	0.966891	0.759259	22.6699	0.726507	0.543451	5	-0.00340009
SMPD3	1.26924e-154	5.61141e-153	0.480613	1.27786	0.609568	26.4637	0.726475	0.663989	6	0.664718
ANAPC5	4.6214e-93	6.49048e-92	0.801847	0.847541	0.837963	20.429	0.726377	0.634267	5	0.41976
MORN1	1.37715e-123	3.38251e-122	0.575682	0.916041	0.723765	23.6142	0.726319	0.607208	5	0.106139
STOM	1.50419e-89	1.97664e-88	1.111	0.915564	0.854938	20.0301	0.726314	0.672815	4	0.622304
CATSPERD	5.36731e-104	9.18476e-103	1.02878	0.943305	0.834877	21.6238	0.726222	0.502907	5	-0.0176349
FBXW9	1.23516e-119	2.83524e-118	0.599022	0.954143	0.720679	23.2263	0.726213	0.596538	1	-0.0318594
TRAK1	2.32589e-91	3.17538e-90	0.893977	0.869121	0.851852	20.2367	0.726136	0.662711	5	0.583465
BPTF	6.75569e-91	9.12272e-90	0.877751	0.833823	0.861111	20.1841	0.726099	0.668627	5	0.596988
EIF2AK2	1.21919e-89	1.60605e-88	1.08887	0.872104	0.891975	20.0406	0.726025	0.620402	4	0.401774
MIPEP	2.4517e-125	6.2011e-124	0.534472	1.03297	0.688272	23.7839	0.726021	0.632667	5	0.363009
FSD1L	4.33522e-143	1.52413e-141	0.496037	1.0261	0.665123	25.4419	0.725959	0.602725	5	0.175853
WRB	3.26854e-94	4.71774e-93	1.01656	0.860809	0.87037	20.5579	0.725801	0.475829	5	-0.0906555
DYNC2LI1	5.67465e-98	8.66336e-97	0.84496	0.814606	0.848765	20.9739	0.72577	0.504624	5	-0.0978474
NHLRC4	1.34201e-132	3.86715e-131	0.563805	0.987471	0.691358	24.4757	0.725693	0.592397	5	0.160128
B9D1	2.79062e-91	3.79059e-90	1.35944	0.919793	0.901235	20.2277	0.72569	0.450256	5	-0.0645628
LARP1	3.11072e-94	4.49801e-93	0.756138	0.875338	0.814815	20.5603	0.725652	0.654887	6	0.486973
HIPK2	3.97654e-103	6.6635e-102	0.682157	0.979098	0.756173	21.5312	0.725599	0.636148	6	0.509169
IRX3	1.2328e-88	1.59788e-87	1.07242	0.839512	0.878086	19.9251	0.725487	0.579144	5	0.274444
TCTEX1D4	5.5332e-94	7.95805e-93	1.39264	0.92472	0.905864	20.5324	0.725471	0.448083	5	-0.0870148
BBIP1	4.0986e-99	6.39025e-98	0.740204	0.897831	0.796296	21.0986	0.725378	0.579009	6	0.22826
FXR1	7.44748e-97	1.11795e-95	0.721815	0.897262	0.799383	20.8511	0.725304	0.644586	6	0.505187
LENG8	4.39741e-84	5.19861e-83	1.16256	0.754646	0.939815	19.3933	0.72528	0.638776	5	0.460297
BEST4	3.83985e-146	1.42773e-144	0.634655	1.1662	0.640432	25.7163	0.725279	0.612792	1	0.0201892
GRAMD1C	7.89284e-152	3.31684e-150	0.459756	1.21296	0.612654	26.2198	0.725199	0.666407	5	0.641267
HDGF	3.58197e-85	4.3136e-84	1.05901	0.810614	0.895062	19.5218	0.72502	0.639327	6	0.345578
RABGAP1L	3.24489e-91	4.40394e-90	0.88961	0.880001	0.841049	20.2203	0.724991	0.673408	6	0.581999
MED25	2.27067e-89	2.97901e-88	0.967504	0.81419	0.876543	20.0096	0.724861	0.603956	5	0.272363
HSPD1	1.12423e-79	1.21349e-78	1.72941	0.717382	0.973765	18.8642	0.72486	0.630244	5	0.450547
DHX40	1.31713e-124	3.28003e-123	0.51588	1.02795	0.679012	23.7132	0.724791	0.645609	6	0.509909
SIX4	7.81239e-135	2.31744e-133	0.473414	1.09198	0.646605	24.6847	0.724722	0.664008	6	0.697065
DPY30	2.49661e-81	2.79777e-80	1.57923	0.785824	0.944444	19.0644	0.724674	0.466918	5	0.013849
APOO	4.85982e-104	8.32516e-103	0.659661	0.95687	0.753086	21.6284	0.724525	0.616096	6	0.394593
HSBP1	2.80838e-77	2.90134e-76	2.69687	0.502155	0.99537	18.57	0.72451	0.516541	5	0.113493
PRPF6	1.17675e-95	1.73734e-94	0.727549	0.862634	0.800926	20.7186	0.724484	0.670154	5	0.580769
NFX1	9.38605e-106	1.65896e-104	0.649386	1.03408	0.725309	21.8097	0.724391	0.642551	6	0.602971
MZF1	6.80918e-114	1.42147e-112	0.585146	0.883628	0.723765	22.6511	0.724367	0.599956	1	-0.167035
EFHC2	4.6948e-119	1.06704e-117	0.621182	0.877013	0.740741	23.1688	0.724287	0.534578	5	-0.12587
RIBC1	5.6447e-107	1.01435e-105	0.789256	0.925843	0.787037	21.9379	0.724273	0.544467	5	0.0544176
LRRC43	1.93294e-162	1.03973e-160	0.436491	1.12451	0.608025	27.1344	0.724246	0.642996	1	0.260805
AC096637.2	4.63093e-158	2.2044e-156	0.461425	1.14999	0.612654	26.7607	0.724079	0.633634	5	0.378601
UBR5	1.04943e-107	1.90278e-106	0.591396	0.944987	0.729938	22.0143	0.724056	0.685711	5	0.645332
ATP9A	2.55297e-101	4.16554e-100	0.681421	0.906846	0.776235	21.3374	0.723978	0.6243	5	0.345372
PPID	1.81696e-108	3.36242e-107	0.606856	0.974881	0.723765	22.0937	0.723884	0.649065	5	0.475957
ATP5IF1	9.99979e-77	1.02002e-75	3.37608	0.606066	0.99537	18.5017	0.723803	0.393896	5	-0.0743073
SMARCA2	3.16028e-90	4.22164e-89	0.86762	0.849166	0.83642	20.1077	0.723605	0.623023	5	0.383813
SEMA3C	3.19355e-98	4.88477e-97	0.702822	0.872775	0.78858	21.0013	0.723602	0.634328	5	0.402329
OTUD4	4.42915e-102	7.3081e-101	0.669183	0.949584	0.756173	21.4192	0.723594	0.604645	6	0.340036
SIGIRR	5.5204e-87	6.88428e-86	0.950323	0.781685	0.873457	19.7339	0.723563	0.590605	1	0.167131
ARL13B	2.1492e-128	5.70422e-127	0.511629	1.06149	0.665123	24.0775	0.72355	0.642236	6	0.468003
ARL3	2.45592e-85	2.96863e-84	1.23935	0.817154	0.91821	19.5411	0.723541	0.463189	5	-0.0486947
UTRN	2.23826e-101	3.65575e-100	0.712046	0.950994	0.757716	21.3435	0.723531	0.632689	6	0.483141
ESYT2	2.05324e-97	3.10236e-96	0.688303	0.895222	0.783951	20.9127	0.723513	0.674678	6	0.664667
RRAD	5.61636e-87	6.99855e-86	1.68488	0.864114	0.924383	19.733	0.72335	0.392598	1	-0.358919
TMEM67	1.68669e-99	2.65283e-98	0.873813	0.832074	0.841049	21.1405	0.723333	0.47786	5	-0.168704
WDTC1	4.64075e-113	9.47947e-112	0.539424	0.998219	0.697531	22.5663	0.723251	0.633745	6	0.543863
TPR	3.20087e-88	4.12559e-87	0.92333	0.858765	0.834877	19.8773	0.72297	0.654983	6	0.462248
TRPV4	6.42991e-141	2.17525e-139	0.456535	1.12414	0.621914	25.245	0.722911	0.682932	5	0.695764
WDR93	9.14468e-134	2.67818e-132	0.520879	0.974197	0.669753	24.585	0.722762	0.602259	5	0.167543
AC090371.1	1.26076e-198	1.66761e-196	0.481465	1.52419	0.544753	30.0452	0.722612	0.659862	5	0.755541
KATNB1	1.74916e-123	4.28317e-122	0.512772	0.998474	0.674383	23.6041	0.722463	0.62137	6	0.272505
SATB1	1.08665e-105	1.91851e-104	0.623698	0.866575	0.75463	21.803	0.722263	0.610242	5	0.212154
FAM221A	9.90428e-104	1.68415e-102	0.64183	0.897306	0.748457	21.5955	0.722149	0.623251	5	0.296408
HAGHL	5.03402e-103	8.42676e-102	0.796423	0.849327	0.800926	21.5202	0.721937	0.545642	1	-0.145252
RBM23	4.40054e-93	6.19107e-92	0.71964	0.849058	0.799383	20.4314	0.721884	0.660507	6	0.382393
FAM161A	9.5583e-143	3.34582e-141	0.4707	1.10008	0.625	25.4109	0.721855	0.615247	6	0.525582
FAM206A	1.00076e-124	2.49987e-123	0.481743	1.06237	0.654321	23.7248	0.72181	0.607852	6	0.470582
TMEM123	2.62467e-78	2.75924e-77	1.40307	0.696245	0.95679	18.6969	0.721696	0.582762	5	0.309715
MACF1	1.24533e-86	1.54109e-85	0.928936	0.822979	0.865741	19.6927	0.721694	0.67574	6	0.564695
KANSL1L	3.46161e-142	1.20648e-140	0.472554	1.15512	0.615741	25.3603	0.721563	0.6413	6	0.514452
NME5	9.19516e-88	1.16745e-86	1.45073	0.87376	0.933642	19.8242	0.721379	0.379141	5	-0.220492
ORAI2	3.52214e-117	7.78585e-116	0.583458	1.00426	0.694444	22.9821	0.721302	0.583295	6	0.336729
CASC4	9.77193e-87	1.21206e-85	0.864653	0.820769	0.851852	19.705	0.721218	0.618938	5	0.379296
DYNC2H1	1.0022e-90	1.34883e-89	1.15969	0.811905	0.899691	20.1646	0.721161	0.417929	5	-0.264937
FAM184A	3.63008e-162	1.92693e-160	0.43688	1.19527	0.58642	27.1112	0.721007	0.666524	5	0.601353
IFI27	1.00412e-74	9.83216e-74	4.48218	0.514846	0.996914	18.2516	0.720944	0.612227	4	0.169891
WBP1	8.50583e-135	2.51851e-133	0.465624	1.20137	0.608025	24.6812	0.720935	0.611806	1	0.0208581
C17orf97	3.16847e-97	4.77847e-96	0.839625	0.852551	0.816358	20.892	0.720931	0.502366	1	-0.2692
REV3L	2.4279e-119	5.5573e-118	0.538707	1.00986	0.67284	23.1972	0.720554	0.66086	5	0.52793
UNC93B1	2.2529e-80	2.46978e-79	1.1901	0.7417	0.941358	18.9489	0.720548	0.597411	5	0.339982
ZBTB20	1.54465e-94	2.23954e-93	0.788007	0.854799	0.800926	20.5943	0.720495	0.633553	5	0.376074
DNAJC10	9.71452e-85	1.16207e-83	0.926828	0.780023	0.882716	19.4708	0.720492	0.62305	5	0.390962
LEKR1	1.27744e-160	6.46208e-159	0.434434	1.18411	0.583333	26.9797	0.720215	0.606775	1	-0.0648286
DNAAF2	2.7192e-109	5.12015e-108	0.580938	1.00653	0.695988	22.1793	0.720189	0.642282	6	0.584011
CFAP97	3.13374e-106	5.58159e-105	0.565515	0.960291	0.70679	21.8598	0.720069	0.616912	6	0.442885
FAM47E	1.4412e-133	4.21315e-132	0.4865	1.02931	0.649691	24.5665	0.719976	0.605511	5	0.207456
NUDT14	4.85834e-91	6.56609e-90	0.783383	0.870347	0.804012	20.2004	0.719953	0.590752	1	0.0470152
TSPAN19	1.81357e-84	2.15664e-83	1.95113	0.895954	0.975309	19.4388	0.719928	0.330003	5	-0.24114
SLC6A6	1.88099e-99	2.95555e-98	0.652785	0.969117	0.739198	21.1354	0.719725	0.682423	6	0.803166
LRRC45	1.51908e-129	4.1548e-128	0.480559	1.0107	0.649691	24.1871	0.719612	0.622705	5	0.269924
POLR2I	4.18338e-75	4.12635e-74	2.1324	0.695634	0.978395	18.2994	0.719586	0.450006	5	0.0215299
ENPP4	1.32195e-104	2.28643e-103	0.594681	0.941564	0.719136	21.6883	0.719574	0.635886	5	0.38127
SPTBN1	1.92142e-78	2.02521e-77	1.34739	0.734857	0.950617	18.7135	0.719383	0.637943	5	0.476634
PCDH7	3.84509e-108	7.05093e-107	0.598037	1.00378	0.697531	22.0598	0.719313	0.663128	5	0.558944
CELF1	1.10867e-80	1.22706e-79	1.0462	0.73858	0.919753	18.9862	0.719203	0.588914	5	0.26364
ERICH6-AS1	1.31619e-143	4.6886e-142	0.466486	1.10937	0.615741	25.4887	0.719154	0.632608	5	0.369179
DALRD3	2.6567e-93	3.77055e-92	0.829039	0.826173	0.816358	20.456	0.719102	0.534468	5	0.0167573
CAPS	4.25345e-74	4.11252e-73	4.20049	0.742293	1	18.1726	0.718992	0.367353	5	-0.073403
USP2	5.39657e-140	1.80673e-138	0.469269	1.0801	0.623457	25.1607	0.718848	0.623527	5	0.314386
DNAJA1	4.05334e-74	3.92374e-73	2.1269	0.613582	0.992284	18.1752	0.718793	0.57441	5	0.271737
SEC14L1	4.49746e-86	5.51906e-85	0.833236	0.850335	0.822531	19.6275	0.718718	0.62123	6	0.362033
MAML2	1.03129e-115	2.22485e-114	0.538565	1.0458	0.662037	22.8349	0.718695	0.665034	1	0.362731
KIAA1671	5.89141e-100	9.33887e-99	0.626092	0.934081	0.731481	21.1901	0.718678	0.623643	6	0.419278
ZMYND12	4.53604e-145	1.66359e-143	0.459629	1.12963	0.611111	25.6203	0.718458	0.616003	5	0.303173
GLYR1	3.29885e-91	4.47341e-90	0.687289	0.817852	0.800926	20.2195	0.718287	0.633929	6	0.458013
PSIP1	6.91695e-102	1.13781e-100	0.650952	0.940709	0.725309	21.3984	0.718177	0.571143	6	0.1139
CLIP1	7.97091e-80	8.63846e-79	1.10491	0.753086	0.907407	18.8823	0.71799	0.62768	1	0.303937
CERS4	1.13934e-93	1.62992e-92	0.779895	0.878996	0.78858	20.4972	0.71784	0.589824	5	0.227812
CFAP20	1.13616e-96	1.70235e-95	0.714193	0.883584	0.768519	20.8309	0.717758	0.581567	6	0.175713
ENOSF1	3.05209e-98	4.67727e-97	0.638896	0.900415	0.736111	21.0034	0.717755	0.642311	6	0.515359
ZNF33A	1.73344e-111	3.43642e-110	0.541089	1.07687	0.66358	22.4057	0.717734	0.651945	6	0.724944
SLC13A3	4.41831e-198	5.74986e-196	0.473522	1.61875	0.521605	30.0035	0.717728	0.676637	5	1.01986
CEP162	3.26943e-146	1.21845e-144	0.431524	1.15399	0.595679	25.7226	0.717707	0.646808	6	0.527363
SPPL2B	1.92549e-98	2.96485e-97	0.672689	0.824392	0.759259	21.0253	0.717697	0.569345	1	-0.269968
COQ8B	1.18714e-118	2.67928e-117	0.482998	0.990772	0.657407	23.1288	0.717649	0.62239	6	0.391698
EPB41L4B	8.74714e-101	1.40871e-99	0.617252	0.943498	0.729938	21.2797	0.717582	0.583477	6	0.311319
RSPH9	5.84559e-84	6.88543e-83	1.5859	0.869513	0.947531	19.3786	0.717535	0.404769	5	-0.142919
SPG11	3.57101e-93	5.03278e-92	0.710034	0.819289	0.776235	20.4416	0.717492	0.575124	1	-0.274362
CD164L2	4.09043e-91	5.53752e-90	1.04855	0.846324	0.854938	20.2089	0.71745	0.458087	5	-0.168396
FTO	5.37797e-118	1.20534e-116	0.659693	1.20125	0.643519	23.0635	0.717424	0.580055	6	0.41657
UCKL1-AS1	3.74205e-127	9.67716e-126	0.549115	0.993811	0.662037	23.9588	0.717346	0.573538	5	0.0361847
AC092802.1	6.31141e-239	2.75263e-236	0.341164	1.50551	0.496914	32.9866	0.717195	0.679273	6	1.01072
CCDC157	1.80112e-106	3.21513e-105	0.642907	0.84365	0.740741	21.8851	0.717179	0.478912	1	-0.557285
CD59	1.12593e-72	1.05573e-71	2.59901	0.612736	0.990741	17.992	0.717103	0.415981	5	-0.0240804
SEM1	1.27597e-72	1.19503e-71	2.19386	0.527858	0.984568	17.985	0.71698	0.614408	5	0.268732
CHD4	5.60192e-88	7.15741e-87	0.74741	0.823244	0.813272	19.8492	0.716938	0.594794	6	0.277839
TTC30B	8.3648e-131	2.31531e-129	0.500437	1.04931	0.632716	24.3065	0.716834	0.619335	5	0.28914
INTS3	2.31811e-107	4.19365e-106	0.547141	0.940309	0.691358	21.9784	0.716665	0.639039	6	0.53317
HSPA4L	5.42462e-132	1.53305e-130	0.475616	1.06475	0.628086	24.4186	0.716662	0.637336	5	0.413569
TSPAN6	6.33512e-78	6.60827e-77	1.22703	0.753703	0.91358	18.6498	0.716644	0.490316	5	0.0245687
POU2AF1	2.94688e-101	4.80342e-100	0.791381	0.878382	0.762346	21.3307	0.716587	0.536131	5	-0.0453948
STRBP	1.06029e-87	1.34406e-86	0.831008	0.800599	0.825617	19.8171	0.716562	0.571476	5	0.133649
STPG1	2.73034e-122	6.48887e-121	0.482954	0.977814	0.652778	23.4876	0.716462	0.637223	6	0.383998
IFIT1	2.07874e-85	2.51648e-84	1.52534	0.887694	0.859568	19.5496	0.716365	0.636948	4	0.420165
ARL6	2.5703e-137	8.05376e-136	0.44622	1.08452	0.612654	24.9148	0.716037	0.591746	6	0.387248
LRWD1	3.53482e-90	4.7025e-89	0.834412	0.771233	0.841049	20.1021	0.715824	0.514454	5	-0.0604277
C12orf74	1.53622e-237	6.35642e-235	0.352078	1.52389	0.489198	32.8898	0.715722	0.613938	1	-0.0434019
CNDP2	1.64156e-79	1.76481e-78	0.965573	0.767774	0.87963	18.8441	0.715709	0.663219	6	0.457445
WDR34	7.32222e-77	7.49738e-76	1.32337	0.74132	0.95216	18.5185	0.715659	0.507804	5	0.104433
ANKRD18A	5.26032e-212	1.02272e-209	0.37286	1.46318	0.509259	31.0526	0.715607	0.671411	1	0.68027
CBX5	7.64719e-98	1.16308e-96	0.625991	0.956237	0.720679	20.9597	0.715426	0.596606	6	0.365139
UACA	4.99949e-111	9.82665e-110	0.547731	1.04754	0.658951	22.3584	0.715347	0.6725	6	0.66142
PPP4R1	3.09176e-85	3.72605e-84	0.755501	0.778444	0.828704	19.5293	0.715322	0.677364	6	0.464936
KDM1B	4.65379e-128	1.22509e-126	0.441558	0.998241	0.632716	24.0455	0.71531	0.612574	6	0.365178
ANKS1A	2.34004e-128	6.20052e-127	0.431875	1.05088	0.617284	24.074	0.715231	0.631073	6	0.639195
PUM2	5.44833e-88	6.96669e-87	0.719006	0.845654	0.785494	19.8506	0.714787	0.633724	6	0.471823
SINHCAF	3.47127e-90	4.62559e-89	0.650091	0.841303	0.771605	20.103	0.714598	0.651117	6	0.535966
TIMP4	4.30782e-281	5.34733e-278	0.327949	1.68054	0.467593	35.8069	0.714585	0.68407	6	1.33746
STAM2	1.67402e-108	3.10503e-107	0.483623	0.946575	0.671296	22.0974	0.714498	0.620203	6	0.518733
RHPN2	1.10206e-98	1.70508e-97	0.580695	0.898666	0.720679	21.0517	0.714489	0.619593	6	0.452781
EVL	1.40264e-122	3.34829e-121	0.508266	1.01597	0.635802	23.5159	0.714455	0.623908	6	0.457323
ANKRD45	7.97987e-148	3.08804e-146	0.403961	1.06204	0.591049	25.8663	0.714371	0.63015	5	0.327216
CEP89	2.40458e-114	5.06562e-113	0.497531	0.964964	0.662037	22.6969	0.714294	0.59946	6	0.409267
ZBED5-AS1	7.04754e-103	1.17607e-101	0.647338	0.994515	0.700617	21.5046	0.714224	0.587872	5	0.215373
SULT1A1	9.27975e-104	1.58128e-102	0.567251	0.938502	0.697531	21.5985	0.71416	0.62591	6	0.368911
C9orf24	6.43787e-74	6.19857e-73	3.53487	0.851758	0.996914	18.1498	0.714143	0.328404	5	-0.135379
ENDOG	3.91533e-83	4.56186e-82	1.06281	0.810547	0.875	19.2805	0.714085	0.475625	5	-0.0756899
AC073335.2	1.21804e-154	5.39986e-153	0.425286	1.15965	0.569444	26.4652	0.714082	0.663177	5	0.452148
MDM1	5.51174e-131	1.53086e-129	0.445403	0.973757	0.623457	24.3236	0.714073	0.603462	6	0.246358
KCTD12	5.42955e-87	6.78148e-86	1.15077	0.882809	0.841049	19.7347	0.714059	0.465721	5	-0.129511
MLXIP	7.26545e-84	8.55161e-83	0.79221	0.81248	0.816358	19.3674	0.714036	0.614192	6	0.36809
JHY	7.97215e-166	4.56194e-164	0.358342	1.14221	0.554012	27.4198	0.714018	0.631827	6	0.471738
CES2	1.92034e-95	2.82484e-94	0.637487	0.92223	0.728395	20.695	0.71396	0.618921	6	0.471922
SNCAIP	7.62383e-194	8.66379e-192	0.357462	1.38098	0.518519	29.6769	0.713942	0.661901	6	0.785916
ABCC5	1.83965e-102	3.05102e-101	0.57344	0.970912	0.689815	21.46	0.71378	0.639056	6	0.625362
PRICKLE2	8.88272e-168	5.23141e-166	0.36121	1.254	0.540123	27.5831	0.713615	0.656686	6	0.7904
GFM2	1.49878e-101	2.4579e-100	0.554618	0.904594	0.70216	21.3623	0.713484	0.593145	6	0.277248
SPART	6.52231e-94	9.3556e-93	0.599218	0.86262	0.742284	20.5244	0.713475	0.675293	6	0.634021
PATL2	5.61791e-154	2.44356e-152	0.421332	1.0779	0.567901	26.4075	0.713429	0.505097	1	-0.749672
HMGN3	3.06506e-70	2.72062e-69	2.70178	0.601578	0.993827	17.6786	0.71317	0.381517	5	-0.0832144
WDR13	1.03935e-79	1.12413e-78	0.913246	0.749489	0.864198	18.8683	0.713023	0.570185	5	0.188279
TYMP	2.54192e-70	2.26249e-69	2.23321	0.612252	0.990741	17.6891	0.712847	0.333826	1	-0.281448
DHRS9	6.80044e-73	6.39503e-72	1.67634	0.713217	0.955247	18.0199	0.712786	0.627723	4	0.479622
PGM2L1	2.08601e-80	2.28837e-79	0.92524	0.808024	0.837963	18.953	0.712776	0.610627	6	0.320736
PPP6R1	9.32336e-90	1.23119e-88	0.673815	0.869002	0.759259	20.0539	0.712769	0.610437	6	0.399956
GTF3C1	8.90474e-114	1.85414e-112	0.491463	1.04559	0.634259	22.6392	0.712713	0.644417	6	0.743728
LPAR3	4.30638e-122	1.02194e-120	0.480839	1.03202	0.634259	23.4682	0.712707	0.617008	5	0.293382
KPNA3	2.93828e-93	4.15193e-92	0.628523	0.870707	0.740741	20.4511	0.712645	0.609301	5	0.245649
EIF4G3	4.52292e-95	6.62309e-94	0.611006	0.921385	0.719136	20.6537	0.712642	0.623971	6	0.451136
NRAV	2.45602e-114	5.16725e-113	0.508771	0.910251	0.66358	22.696	0.712526	0.591817	6	-0.131036
HS3ST6	1.90035e-135	5.68941e-134	0.446703	1.09218	0.601852	24.7418	0.712504	0.632079	5	0.381211
KAZN	6.32073e-108	1.15382e-106	0.4882	0.960858	0.66358	22.0373	0.712402	0.636993	6	0.634175
VEZF1	4.62574e-86	5.67215e-85	0.717863	0.822704	0.780864	19.6261	0.712332	0.648876	6	0.508662
HLA-DQA1	8.14332e-108	1.48317e-106	0.749447	1.20456	0.654321	22.0258	0.712292	0.655877	5	0.676679
HSPA4	6.12658e-90	8.11031e-89	0.663209	0.894006	0.740741	20.0748	0.712198	0.692183	6	0.764756
GK	2.43891e-98	3.74469e-97	0.564529	0.828309	0.719136	21.0141	0.711995	0.676782	6	0.578056
NT5DC1	1.56542e-101	2.56459e-100	0.528379	0.904463	0.691358	21.3603	0.711841	0.637675	5	0.392241
RUVBL1	1.2545e-79	1.3532e-78	1.10301	0.78379	0.885802	18.8584	0.71181	0.459439	5	-0.103357
TULP3	5.85105e-116	1.26566e-114	0.460121	0.974327	0.638889	22.8597	0.711666	0.601151	6	0.443197
CDC16	4.48772e-84	5.29761e-83	0.783385	0.791772	0.811728	19.3922	0.711601	0.554862	5	0.0780957
HLA-F	2.46323e-77	2.54639e-76	1.05986	0.83343	0.833333	18.5771	0.711505	0.610775	1	0.317247
MNAT1	1.15338e-87	1.46091e-86	0.630811	0.804049	0.765432	19.8128	0.711124	0.632686	5	0.376971
USP10	2.08839e-86	2.57648e-85	0.746476	0.877602	0.759259	19.6665	0.711092	0.604547	5	0.281045
SOD1	1.91296e-68	1.6359e-67	2.6984	0.493154	0.989198	17.444	0.710864	0.443069	5	0.0203124
SHISA5	1.43177e-79	1.5427e-78	0.909695	0.819726	0.83642	18.8514	0.710835	0.639397	3	0.484897
CMTM4	2.18481e-99	3.42961e-98	0.575516	0.94728	0.694444	21.1283	0.710769	0.60242	6	0.364356
MUC20	3.44765e-81	3.85549e-80	1.11877	0.801862	0.854938	19.0475	0.710742	0.578177	1	0.0969296
SHANK2	5.13237e-132	1.45555e-130	0.441751	1.03383	0.600309	24.4209	0.710719	0.635533	5	0.363522
PLEKHA7	1.37568e-104	2.37426e-103	0.542116	1.03066	0.660494	21.6865	0.710651	0.669419	6	0.875882
FBRS	1.0764e-94	1.56626e-93	0.564363	0.84558	0.716049	20.6118	0.710641	0.635496	1	0.135792
TGOLN2	6.69957e-79	7.10789e-78	0.806501	0.765076	0.839506	18.7696	0.710621	0.571763	6	0.195839
DAPP1	7.84755e-87	9.75623e-86	0.697541	0.851118	0.774691	19.7161	0.71061	0.660523	4	0.526175
SUDS3	1.72766e-84	2.05751e-83	0.70417	0.869355	0.762346	19.4413	0.71028	0.593224	6	0.291832
CFAP97D2	9.58962e-156	4.38379e-154	0.442358	1.22949	0.557099	26.561	0.71028	0.64558	1	0.351069
LYRM2	1.72506e-89	2.26504e-88	0.640426	0.887472	0.729938	20.0233	0.710184	0.624727	6	0.458425
CHORDC1	5.74836e-94	8.26013e-93	0.623254	0.897043	0.717593	20.5305	0.710179	0.660782	6	0.656264
CNOT1	3.8359e-81	4.28373e-80	0.767328	0.783215	0.808642	19.0419	0.710127	0.638816	6	0.439463
ZSCAN18	5.15761e-93	7.22468e-92	0.586403	0.817026	0.729938	20.4236	0.710023	0.635849	1	0.165516
SIPA1L1	1.54098e-96	2.30036e-95	0.531418	0.927303	0.688272	20.8163	0.709999	0.660438	6	0.719772
PCSK5	5.99875e-110	1.14694e-108	0.484904	1.00376	0.637346	22.2472	0.709995	0.671363	6	0.72003
TOMM34	3.04551e-101	4.95917e-100	0.542433	0.971622	0.671296	21.3291	0.709866	0.654908	6	0.650783
VDAC3	1.11908e-76	1.14006e-75	0.922449	0.737378	0.867284	18.4957	0.709861	0.559812	5	0.170104
AGTRAP	1.6088e-86	1.98784e-85	0.673515	0.791042	0.774691	19.6797	0.709849	0.570475	6	0.185028
PIGQ	8.40182e-105	1.45785e-103	0.522185	0.931261	0.666667	21.7092	0.70982	0.626781	6	0.0322916
AC013470.2	1.07882e-94	1.56837e-93	0.788307	0.783704	0.782407	20.6116	0.709742	0.448081	5	-0.343341
CLCN3	7.62547e-91	1.02886e-89	0.59723	0.824138	0.739198	20.1781	0.709739	0.617109	6	0.407166
C1orf194	5.56353e-72	5.13902e-71	3.23425	0.866471	0.998457	17.9032	0.709708	0.307411	5	-0.147383
FGFR1OP	9.01145e-110	1.71483e-108	0.495076	0.947356	0.651235	22.229	0.709663	0.567761	6	0.228503
ALG1L	8.18496e-119	1.85246e-117	0.519236	1.09466	0.618827	23.1449	0.709527	0.629926	5	0.419408
STIM2	4.81817e-79	5.12868e-78	0.877957	0.802159	0.814815	18.7871	0.709413	0.619175	5	0.376239
AC234582.1	6.82139e-103	1.14069e-101	0.621351	0.831845	0.70679	21.5061	0.70932	0.538415	6	0.0473118
CATIP	5.34507e-94	7.69432e-93	0.731574	0.766886	0.779321	20.534	0.708914	0.511757	5	-0.111234
POFUT2	1.65596e-114	3.50686e-113	0.451054	0.952821	0.628086	22.7133	0.708858	0.655208	6	0.523704
PEAK1	9.16356e-128	2.40053e-126	0.408162	1.08495	0.583333	24.0173	0.708831	0.647774	6	0.806254
ANKRD65	1.98131e-95	2.91187e-94	0.580755	0.938775	0.689815	20.6935	0.7088	0.649711	5	0.529417
CEP170B	9.12009e-91	1.22847e-89	0.573508	0.809412	0.731481	20.1692	0.708627	0.616247	6	0.440024
MKS1	2.16805e-129	5.88986e-128	0.430534	1.03211	0.595679	24.1725	0.708502	0.625797	6	0.387883
PCNX4	8.32605e-91	1.12245e-89	0.635048	0.809888	0.743827	20.1737	0.708467	0.587984	5	0.147359
TPPP	1.59132e-104	2.7435e-103	0.495977	0.94308	0.654321	21.6798	0.708371	0.583804	6	0.363801
DZIP1	2.29908e-174	1.60607e-172	0.353494	1.2313	0.523148	28.1269	0.708282	0.653238	5	0.594879
TCTE1	8.09991e-157	3.74522e-155	0.375597	1.12167	0.549383	26.6537	0.70814	0.631133	5	0.366652
EFEMP1	2.72443e-83	3.1812e-82	0.732011	0.833168	0.780864	19.2993	0.708115	0.619632	5	0.343605
DHX30	6.01689e-82	6.81843e-81	0.704018	0.768811	0.794753	19.1387	0.708095	0.615522	6	0.396227
NIPBL	4.43468e-85	5.33252e-84	0.63477	0.802937	0.760802	19.5109	0.707963	0.686488	6	0.693468
ZNF638	2.56486e-85	3.09567e-84	0.652797	0.820543	0.759259	19.5389	0.707829	0.674694	5	0.587036
GAS7	4.02461e-149	1.60358e-147	0.38594	1.19702	0.54784	25.9813	0.707767	0.596218	6	0.556502
SSBP3	4.04926e-87	5.08505e-86	0.643248	0.820936	0.759259	19.7495	0.707654	0.609401	6	0.280919
RXRA	1.63499e-92	2.27055e-91	0.559816	0.872646	0.705247	20.3672	0.707626	0.641096	6	0.484503
PPP2CB	1.89554e-74	1.84489e-73	0.897212	0.717743	0.881173	18.2169	0.7075	0.60142	6	0.267898
HSPA8	3.89686e-66	3.17434e-65	3.04832	0.441335	0.996914	17.1375	0.707415	0.537948	5	0.0995261
THRAP3	1.50635e-76	1.5288e-75	0.803483	0.741901	0.839506	18.4796	0.707405	0.656486	5	0.516403
MORN5	1.22045e-76	1.24099e-75	1.73951	0.841745	0.941358	18.491	0.707267	0.349231	5	-0.26259
BCLAF1	2.6133e-72	2.43762e-71	1.00928	0.716415	0.891975	17.9453	0.707158	0.621539	6	0.317197
CHCHD6	5.391e-100	8.55403e-99	0.514243	0.873447	0.680556	21.1943	0.707061	0.596449	6	0.205654
GLIS3	2.04929e-103	3.4664e-102	0.490411	0.939451	0.652778	21.5619	0.707042	0.644171	6	0.55871
FAM149A	1.51914e-192	1.71429e-190	0.331872	1.42684	0.490741	29.576	0.706995	0.646996	6	0.985295
SYTL2	7.0249e-74	6.75169e-73	1.02014	0.74682	0.881173	18.1451	0.706983	0.67501	5	0.61752
PRKAR2A	2.20882e-82	2.53332e-81	0.683434	0.803473	0.771605	19.1908	0.706893	0.627175	6	0.437892
WLS	1.49367e-82	1.7229e-81	0.708797	0.8119	0.771605	19.2111	0.706874	0.638311	5	0.431589
PROS1	9.78436e-99	1.51672e-97	0.89285	1.003	0.700617	21.0574	0.706795	0.508941	5	-0.10541
SMC6	4.47722e-104	7.67789e-103	0.512706	0.958695	0.645062	21.6321	0.706778	0.655016	6	0.564514
RBL2	1.04802e-98	1.62303e-97	0.508511	0.948168	0.665123	21.0541	0.706541	0.632014	6	0.598213
PALMD	9.18071e-126	2.34043e-124	0.469692	1.07955	0.592593	23.8251	0.706516	0.610728	5	0.274748
GNA14	3.37251e-132	9.63225e-131	0.383519	1.08041	0.570988	24.438	0.706445	0.649574	6	0.50743
PDCD6	2.4314e-68	2.07266e-67	1.32481	0.663513	0.935185	17.4303	0.706235	0.61787	5	0.291676
NLRP1	9.89031e-108	1.7973e-106	0.540704	0.957461	0.655864	22.017	0.706223	0.580136	5	0.113918
PDPK1	1.57978e-86	1.95348e-85	0.610714	0.835451	0.729938	19.6806	0.70621	0.625887	6	0.476033
TMPRSS3	1.04287e-137	3.30624e-136	0.384587	1.0464	0.566358	24.9509	0.706201	0.648072	1	0.280408
TMEM14B	2.22543e-68	1.89909e-67	1.33671	0.665803	0.935185	17.4353	0.706157	0.532524	6	0.0228364
CCDC82	5.20757e-97	7.83904e-96	0.533333	0.880122	0.680556	20.8682	0.706152	0.642379	5	0.397413
DNPH1	8.06934e-68	6.80685e-67	1.73539	0.707802	0.964506	17.3615	0.705847	0.414944	5	-0.0594465
MGMT	2.51168e-75	2.49114e-74	0.891011	0.751436	0.825617	18.3272	0.705619	0.559554	5	0.155844
BTC	1.51021e-110	2.93972e-109	0.443919	1.04008	0.611111	22.309	0.705543	0.671172	6	0.664629
VRK3	8.89579e-85	1.06492e-83	0.626862	0.833148	0.740741	19.4753	0.70547	0.61157	6	0.391299
BAIAP2	2.20284e-68	1.88081e-67	1.24308	0.654491	0.933642	17.4359	0.705429	0.48498	1	-0.116669
MDN1	7.51387e-138	2.40578e-136	0.399457	1.22948	0.54321	24.9641	0.705383	0.676797	6	0.937899
MID1IP1	1.41082e-83	1.65574e-82	0.686009	0.807027	0.75463	19.3332	0.705383	0.610677	1	0.0364025
PBRM1	5.70247e-81	6.33752e-80	0.675178	0.768645	0.770062	19.0211	0.705349	0.640938	5	0.408658
ATF7IP2	1.34005e-90	1.79903e-89	0.712288	0.881877	0.722222	20.1502	0.705341	0.547711	5	0.0164009
SMPD2	3.23877e-84	3.83731e-83	0.700826	0.784788	0.768519	19.409	0.705309	0.58386	5	0.183366
TTLL3	2.62053e-131	7.32884e-130	0.389339	1.06805	0.564815	24.3541	0.705268	0.663766	6	0.599111
NUP50	2.29962e-80	2.51927e-79	0.682724	0.762659	0.79321	18.9479	0.705146	0.619979	6	0.394645
PEBP1	2.90706e-67	2.42435e-66	1.46964	0.673347	0.942901	17.2878	0.704966	0.554369	5	0.239965
WDR45B	1.47062e-73	1.40423e-72	0.881538	0.736607	0.841049	18.1044	0.704951	0.628255	5	0.423813
ADD3	8.14179e-75	7.97717e-74	0.844756	0.758042	0.830247	18.2631	0.7049	0.635265	6	0.408766
IDS	1.67981e-70	1.50261e-69	1.11076	0.709057	0.908951	17.7125	0.704874	0.612531	6	0.265914
DDX42	3.79251e-82	4.31592e-81	0.660033	0.826074	0.756173	19.1627	0.704865	0.665427	6	0.641682
CMTM6	5.25417e-69	4.53647e-68	1.08597	0.688754	0.908951	17.5176	0.704721	0.602647	5	0.358337
GBP3	2.51774e-94	3.64711e-93	0.670226	1.09526	0.654321	20.5706	0.704632	0.629471	4	0.540537
AC008014.1	8.99148e-222	2.37862e-219	0.305156	1.47185	0.464506	31.7679	0.704589	0.653494	1	0.540192
SELENBP1	1.88136e-71	1.72399e-70	1.15623	0.798714	0.864198	17.8353	0.704513	0.569759	3	0.199559
ETNK1	1.809e-76	1.83366e-75	0.741885	0.71173	0.816358	18.4697	0.704498	0.602797	5	0.231932
CDC14A	2.08854e-145	7.67716e-144	0.369866	1.06479	0.54784	25.6505	0.704473	0.65169	5	0.496048
GDI1	6.36745e-83	7.39219e-82	0.626936	0.808109	0.74537	19.2553	0.704209	0.661655	6	0.375633
NSD3	3.35505e-71	3.05879e-70	0.931768	0.696817	0.865741	17.8029	0.704084	0.583429	1	0.124341
CCDC138	5.33229e-156	2.45149e-154	0.358184	1.19807	0.526235	26.583	0.704022	0.628209	6	0.620321
PRKCE	1.69055e-126	4.34401e-125	0.383225	1.06253	0.570988	23.8959	0.703904	0.633221	6	0.681474
LCOR	1.05728e-78	1.11878e-77	0.68495	0.74244	0.782407	18.7453	0.703819	0.637482	6	0.463185
AL121899.1	9.08314e-92	1.24744e-90	0.708391	0.782304	0.75	20.283	0.703726	0.513604	5	-0.141151
PKN1	3.10917e-105	5.42407e-104	0.463847	0.876717	0.645062	21.7548	0.703713	0.623678	6	0.45129
BCAS1	9.71056e-77	9.9114e-76	0.796918	0.786263	0.813272	18.5033	0.703658	0.606989	5	0.310728
SORBS2	2.8501e-80	3.11811e-79	0.730476	0.748613	0.794753	18.9366	0.703628	0.576231	5	0.131648
MAGIX	3.1165e-98	4.77144e-97	0.511278	0.838264	0.671296	21.0024	0.703592	0.612	5	0.22167
CYB561A3	1.6408e-105	2.88427e-104	0.47128	1.003	0.612654	21.7841	0.703398	0.649572	6	0.478129
SPATA13	2.73872e-93	3.88354e-92	0.53446	0.865181	0.679012	20.4545	0.703395	0.631787	6	0.347075
ROCK1	3.05446e-82	3.48831e-81	0.629344	0.82088	0.739198	19.174	0.703288	0.676527	6	0.661208
WDR27	1.47985e-128	3.96024e-127	0.396724	1.00944	0.569444	24.093	0.703144	0.625464	6	0.402391
EWSR1	1.19621e-67	1.00485e-66	1.15359	0.670673	0.927469	17.3389	0.703078	0.648914	6	0.340382
ALCAM	1.45892e-64	1.15405e-63	1.79588	0.583907	0.981481	16.9255	0.703066	0.644568	5	0.287497
GLT8D1	1.04303e-90	1.40261e-89	0.563047	0.839684	0.697531	20.1626	0.703059	0.583775	6	0.182481
VIM-AS1	1.64644e-128	4.38425e-127	0.454957	1.04286	0.57716	24.0886	0.70303	0.634893	5	0.433949
MDM2	5.49005e-77	5.63568e-76	0.786318	0.729432	0.811728	18.534	0.702957	0.609478	6	0.159733
SLC38A6	4.11615e-117	9.08649e-116	0.414733	0.965066	0.594136	22.9753	0.702804	0.652701	6	0.484968
MAN1A2	3.33693e-82	3.80551e-81	0.610725	0.864988	0.728395	19.1693	0.702744	0.610313	6	0.424262
DNAJC16	4.03087e-100	6.42748e-99	0.480239	0.895166	0.649691	21.208	0.702675	0.604117	6	0.331577
ACSS1	2.88979e-111	5.71477e-110	0.458987	0.961622	0.609568	22.3829	0.702628	0.639582	5	0.401104
SMIM22	1.45758e-63	1.13081e-62	2.60718	0.55964	0.984568	16.7895	0.702588	0.391377	5	-0.0719709
SLC25A29	6.43373e-75	6.31899e-74	0.804686	0.68081	0.83179	18.2759	0.702581	0.591933	5	0.17373
PLXNB2	3.34668e-65	2.6815e-64	1.4934	0.610546	0.975309	17.012	0.702559	0.413812	1	-0.238715
TMEM245	2.90436e-90	3.88299e-89	0.550023	0.896153	0.679012	20.1119	0.70251	0.595042	6	0.397539
GBP1	2.5368e-75	2.51297e-74	1.13986	0.828141	0.82716	18.3266	0.70247	0.537975	4	0.0393258
LINC00240	9.64653e-150	3.87229e-148	0.421223	1.22474	0.529321	26.0362	0.70243	0.623514	6	0.617985
C4orf48	7.17673e-73	6.74495e-72	1.05731	0.788293	0.83179	18.0169	0.702377	0.624858	6	0.423523
TTC30A	1.48772e-135	4.47065e-134	0.414486	1.16698	0.54784	24.7517	0.702284	0.617877	6	0.465963
WWC1	4.3563e-108	7.97929e-107	0.414057	0.959087	0.609568	22.0542	0.702282	0.635791	6	0.655572
ATP6AP1	6.70075e-71	6.0611e-70	0.882292	0.699403	0.865741	17.7641	0.702202	0.585832	5	0.249757
MYEF2	1.0613e-112	2.14344e-111	0.479113	0.844505	0.628086	22.5297	0.702112	0.603322	5	0.0847208
FAIM	6.21346e-85	7.45477e-84	0.615921	0.815863	0.728395	19.4937	0.702102	0.575691	5	0.136449
NPIPA1	1.98218e-108	3.66397e-107	0.462325	0.895439	0.621914	22.0898	0.701973	0.635826	5	0.32455
G3BP2	6.15704e-79	6.5452e-78	0.651046	0.785221	0.756173	18.774	0.701959	0.634294	6	0.484091
PARP9	7.58647e-74	7.27841e-73	0.922911	0.798727	0.824074	18.1408	0.701953	0.626947	4	0.424088
USP43	5.66324e-110	1.08408e-108	0.457783	0.941927	0.608025	22.2498	0.701902	0.623589	6	0.182751
RNPEP	8.52902e-78	8.86809e-77	0.661958	0.751239	0.779321	18.6339	0.701847	0.611668	6	0.355037
SLC16A5	1.81295e-91	2.47929e-90	0.540084	0.901857	0.67284	20.249	0.701837	0.621767	5	0.328944
NUDC	1.1421e-63	8.87769e-63	2.25358	0.657098	0.986111	16.8039	0.701809	0.40276	5	-0.0488278
CD46	2.86305e-70	2.54411e-69	0.904252	0.686565	0.871914	17.6824	0.701645	0.616689	5	0.365997
HSPA1A	5.69488e-65	4.53147e-64	1.77769	0.672848	0.955247	16.9808	0.701635	0.608137	5	0.421081
MRLN	1.25895e-123	3.09691e-122	0.483027	0.993306	0.589506	23.618	0.701607	0.581699	5	0.0681564
ZC3H6	1.14669e-95	1.69452e-94	0.540364	0.86172	0.665123	20.7199	0.701577	0.509842	1	-0.525132
B9D2	1.67978e-79	1.8035e-78	0.765843	0.75169	0.790123	18.8429	0.701527	0.548228	5	0.0532895
MEAF6	3.15534e-67	2.62869e-66	1.13266	0.674254	0.902778	17.2831	0.701472	0.588173	5	0.324631
PIBF1	1.44661e-109	2.74635e-108	0.446464	1.01986	0.597222	22.2077	0.701461	0.615173	6	0.489135
DYNLL1	1.8772e-62	1.42552e-61	3.90977	0.495705	0.996914	16.6371	0.70145	0.319364	5	-0.123741
PRRT3	1.93828e-116	4.22677e-115	0.412169	0.932977	0.594136	22.9079	0.701413	0.625307	6	0.352428
LRGUK	3.93352e-177	2.95233e-175	0.315864	1.23493	0.492284	28.3522	0.701385	0.637678	6	0.602765
CD164	3.63752e-63	2.80318e-62	1.87954	0.554091	0.976852	16.7351	0.70135	0.510579	5	0.133379
EPPIN	2.53987e-86	3.12869e-85	0.918678	0.818301	0.765432	19.6566	0.701302	0.462743	5	-0.265933
ESPN	1.7343e-110	3.37186e-109	0.473154	0.941829	0.611111	22.3028	0.701239	0.617004	6	0.198863
SON	8.19099e-63	6.26139e-62	1.9219	0.522851	0.989198	16.6867	0.70117	0.575171	5	0.255918
KCNH3	5.3349e-144	1.91735e-142	0.379609	1.08717	0.53858	25.524	0.701035	0.607382	6	0.395747
ZNF688	2.8861e-82	3.30071e-81	0.698044	0.776368	0.751543	19.1769	0.700932	0.564052	5	0.0851056
FLNB	2.07711e-67	1.7376e-66	1.1122	0.700352	0.891975	17.3072	0.700858	0.619149	5	0.409125
AGPAT3	2.68451e-91	3.64953e-90	0.498337	0.9181	0.658951	20.2296	0.700792	0.616	6	0.528997
WDR54	9.00905e-70	7.93554e-69	1.66334	0.798759	0.953704	17.6177	0.700691	0.339178	5	-0.256654
EFCAB11	1.96643e-129	5.35561e-128	0.380814	1.1153	0.549383	24.1765	0.700689	0.603593	6	0.580305
SOX2	8.48496e-69	7.29858e-68	1.16221	0.741705	0.884259	17.4904	0.700685	0.625092	6	0.33326
CLIC6	2.14954e-68	1.83627e-67	1.05135	0.691715	0.899691	17.4373	0.700684	0.509468	5	0.00440529
UBL3	1.43893e-69	1.26128e-68	0.909846	0.70886	0.856481	17.5912	0.70068	0.585591	5	0.2557
EXOC7	8.48613e-78	8.82919e-77	0.650428	0.741381	0.762346	18.6342	0.700661	0.635751	6	0.126902
FGD5-AS1	1.51316e-78	1.59908e-77	0.644689	0.810481	0.742284	18.7262	0.700548	0.60313	6	0.362575
C5orf15	7.88211e-74	7.55307e-73	0.766597	0.690399	0.820988	18.1387	0.700499	0.537505	5	-0.0230371
ZMIZ2	5.73873e-93	8.03173e-92	0.499117	0.900867	0.657407	20.4184	0.700477	0.625894	6	0.52019
NFIC	1.81881e-67	1.52231e-66	1.04971	0.717505	0.882716	17.3148	0.700362	0.622167	6	0.311444
DOC2A	1.46139e-138	4.74494e-137	0.430553	1.02156	0.54321	25.0295	0.700335	0.572265	1	-0.57613
RBM43	1.15429e-121	2.71527e-120	0.400279	1.04318	0.567901	23.4263	0.700262	0.640436	5	0.463891
MICAL3	6.2462e-111	1.22473e-109	0.436672	0.957261	0.597222	22.3485	0.700239	0.648131	6	0.467969
ANKRD13D	6.93395e-93	9.68772e-92	0.515975	0.898604	0.658951	20.4091	0.700085	0.607119	6	0.498067
DNAL4	1.75827e-95	2.5888e-94	0.499306	0.856948	0.655864	20.6993	0.700014	0.554984	6	-0.0631187
TRIM44	6.68251e-72	6.15852e-71	0.785753	0.733398	0.817901	17.893	0.699927	0.613852	6	0.364348
IDH2	8.73645e-71	7.88039e-70	0.890695	0.731983	0.83642	17.7492	0.699868	0.513624	6	-0.0227454
HLA-E	4.00479e-62	3.02128e-61	2.25985	0.553576	0.993827	16.5916	0.699823	0.448095	4	-0.00717798
ZNFX1	7.38897e-76	7.41517e-75	0.807104	0.814753	0.787037	18.3936	0.699754	0.605793	4	0.303876
MEIG1	5.73858e-118	1.28438e-116	0.424048	0.907477	0.595679	23.0607	0.699752	0.608597	5	0.224867
APBB1	9.0352e-123	2.17613e-121	0.396025	1.00612	0.569444	23.5346	0.699711	0.639983	6	0.485451
CEP41	5.75764e-101	9.30041e-100	0.477728	0.843642	0.645062	21.2993	0.699709	0.525002	6	-0.0313521
HMGN2	5.48344e-62	4.12716e-61	1.99415	0.533659	0.981481	16.5728	0.699614	0.587301	6	0.0916816
EML1	4.96945e-139	1.62661e-137	0.351136	1.07167	0.53858	25.0724	0.699593	0.576101	6	0.403981
PAK2	1.00161e-71	9.19916e-71	0.797957	0.758296	0.808642	17.8705	0.699485	0.60748	6	0.316377
STAT6	2.99498e-73	2.84965e-72	0.780252	0.742389	0.808642	18.0652	0.699476	0.659741	1	0.35399
TMEM45B	1.35004e-81	1.51922e-80	0.635538	0.817281	0.726852	19.0965	0.699129	0.634219	5	0.412096
PRR18	6.39778e-152	2.69559e-150	0.352975	1.16143	0.516975	26.2278	0.699128	0.602015	6	0.439553
IARS2	5.68702e-77	5.83417e-76	0.652872	0.764851	0.756173	18.5321	0.699072	0.616737	5	0.28632
HSD11B1L	1.73243e-105	3.03873e-104	0.459575	0.896594	0.62037	21.7816	0.698984	0.595974	5	0.150949
WDR73	2.98381e-88	3.8489e-87	0.552369	0.775366	0.697531	19.8808	0.698874	0.578425	6	0.162985
BBS4	3.68184e-119	8.39179e-118	0.418779	0.986099	0.575617	23.1793	0.698583	0.61538	5	0.25335
PDCD6IP	1.52709e-66	1.25472e-65	0.945834	0.646767	0.893519	17.1919	0.698281	0.622864	5	0.382157
SLC25A4	1.91866e-70	1.71436e-69	0.837555	0.733216	0.822531	17.705	0.698218	0.613096	6	0.331935
IQSEC1	6.09032e-110	1.16307e-108	0.440305	1.0204	0.584877	22.2466	0.698208	0.616207	6	0.45667
OAS2	5.50735e-75	5.41573e-74	0.9295	0.854089	0.783951	18.2844	0.698134	0.602253	4	0.331103
MAPK8IP1	2.90225e-97	4.38106e-96	0.526273	0.92548	0.637346	20.8961	0.698086	0.575276	6	0.359422
IQCH	1.69904e-145	6.25968e-144	0.344868	1.08851	0.523148	25.6585	0.69802	0.613867	6	0.462674
HAGH	5.51067e-72	5.09311e-71	0.770527	0.725836	0.796296	17.9038	0.697922	0.579231	5	0.190171
AZIN1-AS1	2.31321e-129	6.27365e-128	0.378782	1.05227	0.54784	24.1698	0.69786	0.62013	6	0.528006
LINC02541	2.68038e-147	1.02496e-145	0.373373	0.984943	0.524691	25.8195	0.69786	0.476831	1	-0.928292
WRAP53	2.76698e-102	4.57957e-101	0.475812	0.871568	0.626543	21.4411	0.697821	0.599273	5	0.179748
LRRC27	3.32506e-121	7.7763e-120	0.389862	0.985646	0.563272	23.3811	0.697815	0.636312	5	0.394371
NFIA	9.06499e-72	8.3399e-71	0.788716	0.746367	0.802469	17.876	0.697801	0.617491	6	0.368156
CAPSL	1.45453e-67	1.21994e-66	2.10075	0.796974	0.979938	17.3277	0.697764	0.287194	5	-0.334885
SDCCAG8	1.80898e-74	1.7617e-73	0.701572	0.731983	0.776235	18.2194	0.697647	0.637649	6	0.430998
ZMAT2	2.68519e-72	2.50323e-71	0.728691	0.781058	0.770062	17.9438	0.697606	0.607092	6	0.352094
ETV6	1.47028e-75	1.46456e-74	0.712039	0.826525	0.762346	18.3563	0.697491	0.617851	3	0.463824
HLA-DQB1	9.70771e-90	1.28089e-88	0.667227	1.07936	0.632716	20.0519	0.697466	0.655735	3	0.876905
ZNHIT2	4.90478e-82	5.56599e-81	0.616186	0.719053	0.733025	19.1493	0.697452	0.510464	1	-0.458041
NIN	4.23063e-102	6.99484e-101	0.44156	0.937356	0.604938	21.4213	0.697364	0.622178	6	0.500156
LRRC73	8.48019e-100	1.33899e-98	0.484603	0.806256	0.651235	21.1729	0.697271	0.574395	6	0.0509141
MPC2	2.4235e-64	1.90957e-63	1.16979	0.687696	0.898148	16.8956	0.697063	0.540782	6	0.0839643
CCDC34	2.08699e-84	2.47812e-83	0.610953	0.71956	0.729938	19.4316	0.696907	0.503599	6	-0.0944119
BCL6	1.33257e-81	1.5006e-80	0.601688	0.807887	0.708333	19.0972	0.696849	0.630826	1	0.147824
CCDC148	1.02253e-137	3.24814e-136	0.355394	1.07618	0.527778	24.9517	0.69662	0.621534	6	0.529534
FMN1	6.66625e-123	1.61279e-121	0.382684	1.14894	0.540123	23.5474	0.696556	0.650068	6	0.753313
INHBB	2.80224e-118	6.29802e-117	0.418192	0.976123	0.569444	23.0917	0.696536	0.631521	5	0.341488
TTC39C	1.85696e-86	2.29271e-85	0.539423	0.853729	0.666667	19.6725	0.69648	0.596001	6	0.366392
AC008771.1	6.9248e-103	1.15679e-101	0.467111	0.985792	0.601852	21.5054	0.696461	0.576454	6	0.365344
LXN	2.21774e-82	2.54174e-81	0.639488	0.792464	0.714506	19.1906	0.696427	0.54528	5	-0.0457445
NRDC	3.16406e-77	3.26461e-76	0.592574	0.75814	0.729938	18.5636	0.696423	0.654336	6	0.586914
PSMB10	6.00677e-69	5.17519e-68	0.884056	0.774157	0.79784	17.51	0.69638	0.655606	3	0.568518
SLC27A2	1.86677e-68	1.59725e-67	0.981805	0.70025	0.856481	17.4454	0.696377	0.482344	5	-0.110323
CERS6	4.7783e-81	5.32878e-80	0.562035	0.822301	0.699074	19.0304	0.696061	0.595074	6	0.36586
CAB39	5.57877e-76	5.61952e-75	0.658317	0.799783	0.740741	18.4088	0.695973	0.597408	6	0.355925
RC3H1	4.13549e-80	4.503e-79	0.583175	0.775812	0.703704	18.9169	0.695899	0.594353	1	-0.0968964
LRRC49	1.70403e-98	2.62635e-97	0.481715	0.829539	0.638889	21.0311	0.695897	0.581262	6	0.132242
TRIM22	1.46381e-74	1.42901e-73	0.804235	0.828531	0.763889	18.231	0.695863	0.62276	3	0.411585
FZD6	4.84034e-89	6.31946e-88	0.497854	0.877721	0.646605	19.9718	0.695671	0.629557	6	0.359856
BBS9	1.12293e-143	4.00902e-142	0.313531	1.08188	0.512346	25.4949	0.695571	0.617583	6	0.553481
BNIP3	4.28753e-84	5.07242e-83	0.572569	0.817089	0.689815	19.3946	0.69551	0.61916	5	0.331229
TOB2	1.61541e-79	1.73785e-78	0.588255	0.845581	0.694444	18.845	0.695472	0.629536	6	0.549708
RTP4	1.47417e-80	1.6238e-79	0.609526	0.854736	0.70216	18.9712	0.695419	0.663766	6	0.659673
IGF1R	4.05087e-77	4.17426e-76	0.601236	0.750144	0.734568	18.5504	0.695337	0.619042	6	0.467784
TMBIM6	7.01861e-59	4.9179e-58	2.67205	0.388731	0.998457	16.1369	0.695237	0.564484	5	0.143713
ANKZF1	4.08826e-93	5.75675e-92	0.471687	0.787642	0.646605	20.435	0.695193	0.622981	6	0.213239
CBY1	1.45895e-80	1.60814e-79	0.626419	0.774628	0.719136	18.9718	0.695127	0.506996	6	-0.0556977
SORT1	5.08143e-88	6.5182e-87	0.486227	0.913433	0.641975	19.8541	0.695061	0.616679	6	0.552837
ACSBG1	3.44258e-199	4.70787e-197	0.295939	1.34801	0.455247	30.0883	0.695027	0.654881	5	0.749102
PLCB4	5.97119e-107	1.07183e-105	0.405881	1.00795	0.574074	21.9354	0.69494	0.628079	6	0.731781
C22orf23	1.17443e-141	4.04088e-140	0.357139	1.05745	0.520062	25.3121	0.694858	0.60203	1	-0.0906197
C2CD2L	1.95388e-112	3.93138e-111	0.387137	0.984756	0.563272	22.5027	0.69485	0.604579	6	0.367647
ERLIN2	5.4161e-87	6.76992e-86	0.479391	0.850098	0.654321	19.7348	0.694793	0.593226	6	0.409219
TP53TG1	9.41027e-67	7.75159e-66	0.909807	0.706519	0.830247	17.2199	0.694775	0.535481	5	0.05426
RHOU	1.3723e-105	2.41491e-104	0.42197	0.984079	0.583333	21.7923	0.694771	0.59385	6	0.514501
PCYT2	3.59928e-79	3.84646e-78	0.593076	0.747656	0.716049	18.8025	0.694714	0.574761	6	0.044462
OSBPL3	1.74817e-85	2.11788e-84	0.529157	0.789481	0.674383	19.5584	0.694641	0.63207	5	0.332151
SCPEP1	3.86396e-67	3.2124e-66	1.01349	0.746741	0.819444	17.2714	0.69464	0.531781	5	0.0472457
STIP1	1.36276e-70	1.22239e-69	0.727763	0.730648	0.782407	17.7242	0.694504	0.635455	6	0.458376
DNAJB4	1.19694e-99	1.88807e-98	0.431701	0.915179	0.597222	21.1567	0.694325	0.648814	6	0.696276
USP11	1.29131e-76	1.31138e-75	0.58599	0.728818	0.729938	18.4879	0.694155	0.621498	5	0.290708
SQLE	3.73815e-71	3.40037e-70	0.795246	0.680011	0.810185	17.7968	0.694124	0.543525	5	0.00204597
TRIP12	2.58145e-69	2.24323e-68	0.725656	0.704133	0.800926	17.558	0.694121	0.666686	6	0.561519
FDXR	1.09586e-86	1.35821e-85	0.535655	0.765292	0.680556	19.6992	0.694115	0.558041	5	-0.035023
SSB	2.27332e-60	1.65395e-59	1.50965	0.628904	0.962963	16.3473	0.694072	0.477685	5	0.0414227
NEIL1	3.03601e-87	3.81855e-86	0.528754	0.798125	0.662037	19.7641	0.694011	0.599552	6	0.206662
ZNF561	3.43107e-106	6.10443e-105	0.40902	1.06609	0.563272	21.8557	0.693984	0.655622	6	0.933009
IGSF10	5.11257e-119	1.16036e-117	0.391095	0.979033	0.552469	23.1652	0.693972	0.625222	5	0.297251
ACVR1B	1.32441e-115	2.84582e-114	0.376802	1.08351	0.544753	22.824	0.693826	0.640563	6	0.678865
CALCOCO1	1.79376e-87	2.26493e-86	0.476978	0.827655	0.654321	19.7906	0.693601	0.595362	6	0.435175
P4HA1	8.33224e-99	1.2941e-97	0.430326	0.92275	0.598765	21.065	0.693592	0.646173	6	0.510428
AC244090.1	3.64195e-69	3.15122e-68	1.02666	0.717525	0.848765	17.5385	0.693558	0.446462	5	-0.2032
DHCR24	1.71098e-61	1.27294e-60	1.3393	0.680499	0.933642	16.5042	0.693521	0.605731	6	0.278497
TRMT10A	2.72721e-119	6.23356e-118	0.356842	1.02951	0.537037	23.1922	0.693515	0.638282	6	0.655131
PLEKHA5	3.7772e-65	3.02344e-64	0.889308	0.686153	0.844136	17.0049	0.693484	0.61623	5	0.344608
YWHAE	3.39453e-58	2.33693e-57	2.08254	0.491093	0.986111	16.0393	0.69348	0.502757	5	0.0971391
C4orf3	1.37042e-58	9.52803e-58	1.84744	0.538738	0.972222	16.0956	0.693439	0.541269	5	0.204957
DYNC1LI2	1.03585e-67	8.71053e-67	0.730102	0.695981	0.805556	17.3472	0.693288	0.615816	6	0.332343
FNDC3A	7.30309e-83	8.46623e-82	0.51519	0.886614	0.654321	19.2482	0.693258	0.642877	6	0.679654
DYRK1B	1.18513e-106	2.11788e-105	0.382608	0.928505	0.574074	21.9042	0.693223	0.57702	6	0.378709
MAZ	5.66118e-73	5.34549e-72	0.6451	0.72241	0.757716	18.03	0.693143	0.494981	6	-0.100652
ZFR	4.01778e-78	4.20187e-77	0.549167	0.835417	0.686728	18.6742	0.693099	0.648204	6	0.650793
SRCIN1	1.09195e-141	3.76513e-140	0.331039	1.01575	0.510802	25.315	0.693	0.606913	6	0.398379
TNKS2	6.96636e-76	6.99976e-75	0.587848	0.768345	0.716049	18.3968	0.692994	0.639242	6	0.476659
NPTN	1.11395e-63	8.67137e-63	0.978486	0.676303	0.891975	16.8054	0.692988	0.628778	3	0.375204
SCAF11	1.15908e-62	8.8185e-62	0.969183	0.642338	0.873457	16.6659	0.692925	0.632652	5	0.455095
SLC20A2	1.56237e-75	1.55438e-74	0.646979	0.722214	0.74537	18.353	0.692883	0.550162	4	-0.0779275
MARVELD2	7.1045e-85	8.51116e-84	0.493574	0.89604	0.646605	19.4868	0.692865	0.634081	6	0.67961
IFT52	3.1731e-90	4.23527e-89	0.47868	0.86529	0.634259	20.1075	0.692848	0.573711	6	0.309922
RPA3	3.80632e-62	2.8729e-61	1.34705	0.688739	0.908951	16.5947	0.692714	0.399122	5	-0.20072
XAF1	5.42951e-68	4.59685e-67	1.08446	0.778365	0.819444	17.3843	0.692579	0.591208	4	0.294546
RPS6KA5	3.30541e-107	5.96638e-106	0.40457	0.847643	0.580247	21.9623	0.692522	0.61925	5	0.170432
GOLPH3L	3.69878e-75	3.6506e-74	0.556879	0.759253	0.722222	18.3061	0.692449	0.570036	6	0.259262
PLA2G16	2.04192e-65	1.64178e-64	0.892121	0.703627	0.828704	17.0409	0.692359	0.54903	5	0.138185
ARMC9	3.50327e-115	7.48771e-114	0.389991	0.983508	0.552469	22.7814	0.692232	0.602608	6	0.372373
JOSD2	1.58714e-64	1.25363e-63	0.943917	0.698097	0.842593	16.9206	0.692221	0.567651	5	0.190125
MAP7	3.16993e-76	3.20107e-75	0.545603	0.816988	0.692901	18.4394	0.692004	0.630261	6	0.546756
SEPT9	3.78518e-63	2.9128e-62	0.911507	0.672491	0.862654	16.7327	0.691979	0.617551	6	0.29551
EPB41L1	3.79823e-86	4.67164e-85	0.461262	0.878598	0.635802	19.6361	0.691964	0.635038	3	0.614164
MGAT5	3.51173e-93	4.95357e-92	0.448592	0.932225	0.603395	20.4424	0.691923	0.63349	6	0.642217
JADE1	3.35355e-97	5.05287e-96	0.441347	0.819057	0.611111	20.8892	0.69176	0.613263	6	0.186991
MID1	1.37941e-80	1.5215e-79	0.537758	0.828922	0.671296	18.9747	0.691745	0.65711	6	0.630008
ARHGEF28	1.46731e-88	1.90032e-87	0.463206	0.862889	0.625	19.9164	0.691557	0.599812	6	0.468331
PRPF4B	2.48591e-66	2.03114e-65	0.761514	0.622365	0.816358	17.1636	0.691484	0.557112	1	-0.189125
CFDP1	2.96901e-59	2.09493e-58	1.36553	0.619666	0.930556	16.1899	0.691462	0.523605	1	0.0924443
NAP1L4	1.6113e-67	1.35003e-66	0.727606	0.701049	0.782407	17.3218	0.691408	0.645757	6	0.510375
HLA-DRA	4.67604e-57	3.14537e-56	2.66114	0.544442	0.973765	15.8756	0.691357	0.500858	5	0.0505872
ZNF3	1.47796e-97	2.23942e-96	0.44718	0.938876	0.592593	20.9283	0.691244	0.576711	6	0.367128
NR2F2	1.78906e-72	1.67168e-71	0.642781	0.776861	0.736111	17.9663	0.691235	0.597529	6	0.360543
SYTL1	3.25487e-61	2.41156e-60	1.07471	0.629598	0.888889	16.4653	0.69119	0.508583	1	-0.139382
WDR31	1.48015e-162	7.98834e-161	0.285062	1.16691	0.472222	27.1443	0.691091	0.65273	6	0.717279
CEP164	1.51396e-95	2.23113e-94	0.426156	0.780341	0.612654	20.7065	0.691043	0.571434	1	-0.358204
SMIM19	3.22308e-63	2.49094e-62	0.932863	0.676414	0.844136	16.7423	0.69088	0.554101	5	0.153077
AC130456.2	6.1256e-109	1.14674e-107	0.402973	0.958171	0.558642	22.1428	0.690792	0.589168	6	0.343088
HNRNPF	3.84839e-57	2.59296e-56	1.69776	0.552229	0.976852	15.8878	0.690596	0.523044	5	0.176447
OGFOD2	6.88346e-105	1.19697e-103	0.365315	0.844771	0.570988	21.7183	0.690447	0.633338	6	0.331625
MYB	5.63323e-97	8.464e-96	0.458594	0.815119	0.609568	20.8645	0.690441	0.51024	6	-0.120473
ZFYVE16	4.30364e-94	6.20623e-93	0.427915	0.828089	0.603395	20.5446	0.690438	0.656761	6	0.478333
PHC1	5.61576e-124	1.39204e-122	0.350163	1.00595	0.523148	23.6521	0.690407	0.610679	6	0.450676
FBXO31	1.20612e-122	2.88771e-121	0.346249	0.980688	0.523148	23.5223	0.690358	0.620321	1	-0.059819
NUMA1	3.25578e-73	3.09596e-72	0.565429	0.679665	0.731481	18.0606	0.690349	0.631964	6	0.225968
NFE2L1	2.48659e-75	2.4693e-74	0.564213	0.722842	0.705247	18.3277	0.69023	0.633854	6	0.143465
GCLC	4.12906e-64	3.23921e-63	0.993377	0.721831	0.845679	16.8642	0.690117	0.61735	5	0.38343
SRI	3.01446e-56	1.99199e-55	2.28277	0.528201	0.983025	15.7582	0.690058	0.40758	5	-0.0548419
DIDO1	1.34372e-80	1.48416e-79	0.49641	0.763257	0.665123	18.9761	0.690047	0.635564	6	0.433455
AK1	2.23998e-78	2.35944e-77	0.585073	0.820639	0.680556	18.7053	0.689999	0.586477	6	0.350796
AAED1	1.47613e-89	1.94134e-88	0.419912	0.846407	0.615741	20.0311	0.68998	0.606915	6	0.47744
RAB11FIP4	2.33527e-98	3.58897e-97	0.396582	0.914745	0.58179	21.0161	0.689971	0.597525	6	0.456667
FARP1	4.72785e-70	4.18046e-69	0.629297	0.717708	0.736111	17.6541	0.689887	0.579592	6	0.258742
ARSD	4.44786e-75	4.38456e-74	0.577702	0.815881	0.691358	18.2961	0.68984	0.588831	6	0.353202
ARHGAP32	2.50229e-69	2.17679e-68	0.652117	0.730937	0.75	17.5598	0.689764	0.613361	6	0.429262
DIAPH2	9.3551e-106	1.6553e-104	0.452026	1.04965	0.557099	21.8098	0.689702	0.626342	6	0.513746
LINC00271	3.80077e-196	4.64644e-194	0.287606	1.32774	0.439815	29.8548	0.689581	0.633738	1	0.387519
RBM38	1.58796e-88	2.05493e-87	0.471776	0.851097	0.623457	19.9124	0.689463	0.591134	6	0.434128
GCLM	6.9943e-63	5.35677e-62	0.881217	0.659502	0.848765	16.6961	0.689442	0.623694	5	0.372431
PAIP2B	6.67173e-112	1.33245e-110	0.373392	0.964807	0.546296	22.4481	0.689419	0.605167	6	0.311495
UGDH	8.01736e-66	6.49805e-65	0.798809	0.728673	0.796296	17.0955	0.68938	0.613263	6	0.429443
C20orf194	7.74882e-106	1.37259e-104	0.37423	0.921152	0.557099	21.8185	0.689188	0.630893	6	0.472152
WDPCP	1.46249e-131	4.1187e-130	0.347879	1.08513	0.503086	24.378	0.689167	0.62077	6	0.403746
FAM120A	5.50733e-60	3.96042e-59	1.01361	0.657462	0.887346	16.2933	0.689069	0.606899	5	0.310478
NELFE	3.4105e-61	2.52571e-60	0.94746	0.609548	0.884259	16.4625	0.689064	0.537053	5	0.0997869
IRF9	8.5318e-96	1.26426e-94	0.424146	0.968621	0.569444	20.7341	0.688977	0.595509	1	-0.128988
FAM102A	1.58146e-67	1.32571e-66	0.725721	0.758107	0.763889	17.3229	0.688954	0.581621	6	0.287067
NDUFS1	3.36508e-80	3.67156e-79	0.477114	0.825555	0.651235	18.9278	0.68893	0.616764	6	0.540076
DUSP14	4.74529e-65	3.78708e-64	0.772339	0.652617	0.814815	16.9915	0.688858	0.631336	6	0.34176
PPP2R5C	1.72473e-66	1.41495e-65	0.67357	0.679045	0.779321	17.1848	0.688794	0.611019	6	0.376391
MINDY4	5.24754e-130	1.44258e-128	0.336236	0.9896	0.512346	24.231	0.688763	0.580585	6	0.440271
GNG12	6.02387e-72	5.55787e-71	0.586166	0.767589	0.712963	17.8988	0.688727	0.604501	6	0.391167
C21orf2	1.74064e-71	1.59685e-70	0.619894	0.70699	0.737654	17.8396	0.68868	0.565669	6	0.0933428
PZP	1.62607e-128	4.33717e-127	0.347778	0.96036	0.516975	24.0891	0.688656	0.616435	5	0.227041
BAZ2B	6.34279e-74	6.11067e-73	0.575312	0.767448	0.697531	18.1507	0.688605	0.676646	6	0.656398
ATN1	1.70633e-80	1.87569e-79	0.472252	0.785127	0.652778	18.9636	0.688569	0.631858	6	0.231465
TTLL7	6.55795e-104	1.11985e-102	0.420798	0.821988	0.580247	21.6145	0.688518	0.605428	5	0.103862
SNED1	1.51927e-158	7.34028e-157	0.317457	1.18727	0.466049	26.8023	0.68844	0.649101	5	0.594164
EVA1C	3.00178e-70	2.66591e-69	0.619755	0.758414	0.733025	17.6798	0.68842	0.572967	6	0.270982
SAMD4B	3.61137e-74	3.5001e-73	0.538711	0.778157	0.686728	18.1816	0.688407	0.577963	6	0.308234
LRRC18	1.4435e-151	6.01908e-150	0.30637	1.11623	0.478395	26.1968	0.688396	0.619748	6	0.468603
MBOAT7	1.43209e-79	1.5427e-78	0.503137	0.834939	0.645062	18.8514	0.688316	0.603942	6	0.490746
BTBD9	1.0795e-132	3.12744e-131	0.309599	1.09409	0.492284	24.4845	0.688202	0.629083	6	0.723915
IRF2	6.23875e-73	5.8771e-72	0.569408	0.753828	0.699074	18.0247	0.688188	0.654227	1	0.237278
NAT14	1.74306e-96	2.59961e-95	0.412592	0.78124	0.601852	20.8104	0.688168	0.575725	6	0.056721
ADD1	1.05415e-72	9.89e-72	0.545746	0.760589	0.70216	17.9956	0.688032	0.614998	6	0.475642
SFI1	1.62114e-92	2.25325e-91	0.420197	0.852728	0.594136	20.3676	0.687917	0.584166	6	0.434218
DDB1	7.90866e-68	6.67479e-67	0.629119	0.698741	0.75	17.3627	0.687868	0.576093	6	0.249397
POR	1.04334e-59	7.45299e-59	0.971779	0.63452	0.881173	16.2542	0.687853	0.643301	5	0.424494
RUNDC1	1.76043e-92	2.44055e-91	0.412258	0.875635	0.587963	20.3636	0.687827	0.569853	6	0.350614
RNF6	5.37276e-80	5.83447e-79	0.484278	0.771635	0.655864	18.9031	0.687816	0.600297	6	0.325822
AC027237.3	1.18632e-136	3.6744e-135	0.329139	1.01276	0.496914	24.8535	0.6878	0.594272	1	-0.145642
PRR34-AS1	1.843e-76	1.86695e-75	0.545279	0.717048	0.686728	18.4687	0.687766	0.60245	5	0.174365
CD4	5.63098e-108	1.03024e-106	0.431413	0.998402	0.550926	22.0425	0.687745	0.583176	6	0.41431
EIF2AK1	9.26334e-70	8.15507e-69	0.574459	0.739595	0.723765	17.6161	0.687741	0.587704	6	0.30942
ZNF24	4.37636e-68	3.71105e-67	0.620272	0.712261	0.736111	17.3966	0.687334	0.616516	6	0.43067
COG7	1.56576e-82	1.80347e-81	0.469411	0.836746	0.628086	19.2087	0.687332	0.565608	6	0.285334
HSPA1B	5.59708e-61	4.1242e-60	1.02503	0.640004	0.854938	16.4325	0.687276	0.654109	5	0.428326
XRN2	4.88465e-64	3.82453e-63	0.74443	0.659057	0.800926	16.8542	0.687257	0.563621	5	0.100125
BUD23	6.92063e-58	4.73012e-57	1.08798	0.601149	0.908951	15.995	0.687234	0.538535	5	0.140056
HSPB11	2.06453e-56	1.36931e-55	1.62993	0.623423	0.958333	15.7821	0.687122	0.373913	5	-0.209599
C2orf50	3.2121e-160	1.5998e-158	0.290987	1.19657	0.459877	26.9456	0.687091	0.589053	6	0.569434
PHIP	9.57955e-59	6.68621e-58	1.06244	0.62935	0.87963	16.1177	0.687065	0.546899	5	0.109356
NUMB	4.51136e-72	4.17669e-71	0.552491	0.716174	0.703704	17.9149	0.686984	0.637445	6	0.441187
LRBA	2.51562e-75	2.49352e-74	0.535774	0.725687	0.683642	18.3271	0.686862	0.602099	6	0.273402
CTBS	2.63816e-80	2.88819e-79	0.453635	0.811945	0.635802	18.9406	0.686836	0.638939	6	0.564639
STAT3	1.04184e-58	7.25911e-58	0.981103	0.618444	0.895062	16.1125	0.686826	0.646555	6	0.384877
KCNRG	1.30393e-90	1.752e-89	0.481343	0.712681	0.635802	20.1516	0.686795	0.510892	5	-0.307539
STAG2	2.46294e-70	2.19461e-69	0.577525	0.71695	0.720679	17.6909	0.686645	0.600441	6	0.385193
NARF	3.65366e-78	3.82852e-77	0.504262	0.709381	0.658951	18.6792	0.68656	0.558559	1	-0.404266
DDX6	1.63076e-68	1.39605e-67	0.590071	0.680827	0.734568	17.4531	0.686512	0.612808	6	0.402583
FBXO11	6.20763e-82	7.02965e-81	0.440605	0.766843	0.631173	19.137	0.686427	0.650413	6	0.427517
TPRG1L	8.5649e-94	1.22637e-92	0.392511	0.923566	0.575617	20.5111	0.686399	0.585742	6	0.458574
MIR200CHG	1.30032e-69	1.14101e-68	0.626956	0.768797	0.714506	17.5969	0.686355	0.630033	6	0.215491
PARVA	2.3048e-67	1.92708e-66	0.639492	0.705662	0.742284	17.3012	0.686259	0.593112	5	0.197319
RERE	5.381e-66	4.37006e-65	0.645669	0.668557	0.765432	17.1187	0.686244	0.629113	1	0.175568
AL353770.4	3.1938e-147	1.21553e-145	0.323138	1.17822	0.473765	25.8127	0.686085	0.622768	6	0.557467
AP4M1	3.05993e-96	4.55098e-95	0.389127	0.81233	0.57716	20.7834	0.686043	0.618259	6	0.272206
CRNDE	3.60192e-55	2.32404e-54	1.62992	0.601475	0.964506	15.6007	0.686037	0.472663	5	0.0579071
THNSL2	2.17369e-136	6.70685e-135	0.300371	1.18876	0.472222	24.8291	0.686009	0.642719	1	0.389948
WNT9A	1.23679e-115	2.66108e-114	0.356761	1.01762	0.518519	22.827	0.686004	0.646193	5	0.533722
SAMD15	1.53841e-178	1.19352e-176	0.30463	1.28048	0.442901	28.4661	0.68598	0.620385	1	0.218495
SRD5A2	1.03825e-122	2.48948e-121	0.37598	1.02033	0.516975	23.5287	0.685927	0.594102	5	0.163386
CCDC13	5.6616e-151	2.31881e-149	0.294962	1.08631	0.469136	26.1447	0.685822	0.620877	6	0.580025
NCBP3	2.00632e-81	2.25145e-80	0.454743	0.823583	0.626543	19.0758	0.685748	0.621013	6	0.590575
PSMD10	4.29152e-73	4.06888e-72	0.517158	0.718205	0.691358	18.0453	0.685693	0.577205	6	0.273323
EIF4H	9.74297e-62	7.30927e-61	0.741969	0.648203	0.830247	16.5382	0.685666	0.627697	6	0.377693
AGBL4	3.4209e-167	1.99289e-165	0.294848	1.178	0.450617	27.5342	0.685538	0.621818	1	0.122691
C2CD3	1.03756e-107	1.88336e-106	0.356062	1.00546	0.526235	22.0149	0.685481	0.582642	6	0.468904
F11R	2.52908e-57	1.71118e-56	1.09936	0.636609	0.907407	15.9141	0.685453	0.588045	6	0.225145
ZC2HC1C	1.16826e-112	2.35653e-111	0.373634	0.910204	0.532407	22.5255	0.685397	0.586063	6	-0.106649
DCAF5	2.00236e-80	2.1981e-79	0.45538	0.827696	0.626543	18.9551	0.685388	0.612353	6	0.543239
SREK1	5.78308e-64	4.5192e-63	0.693226	0.629448	0.785494	16.8442	0.685377	0.619581	6	0.368034
SLC25A14	7.03488e-108	1.28273e-106	0.346349	0.919293	0.537037	22.0325	0.685203	0.571128	6	0.352984
SPATA7	1.08687e-116	2.37976e-115	0.340799	0.981041	0.516975	22.9331	0.684944	0.594756	6	0.409523
ADPRHL2	1.55662e-64	1.23013e-63	0.722188	0.649241	0.765432	16.9217	0.684942	0.571117	1	-0.17592
AMZ2	3.68264e-72	3.41533e-71	0.523501	0.741625	0.683642	17.9262	0.684903	0.580187	6	0.306363
RPRD2	1.67739e-87	2.11965e-86	0.41775	0.908705	0.584877	19.794	0.684865	0.599441	6	0.530372
CSNK1G2	3.48414e-80	3.79889e-79	0.456374	0.811066	0.626543	18.926	0.68486	0.573942	6	0.332675
GSTA2	6.96744e-65	5.53587e-64	1.58291	0.910912	0.734568	16.969	0.68479	0.500062	5	-0.0771997
PAF1	3.72408e-73	3.53503e-72	0.50701	0.742292	0.675926	18.0532	0.684753	0.596616	6	0.324217
SLC27A1	6.71604e-109	1.25581e-107	0.336247	0.960957	0.523148	22.1386	0.684724	0.626094	6	0.649494
TP53INP1	2.93778e-75	2.90484e-74	0.543447	0.742473	0.677469	18.3186	0.684698	0.569133	6	0.111173
DPCD	4.13055e-60	2.98632e-59	1.27331	0.672682	0.904321	16.3109	0.684647	0.377256	5	-0.292463
ARAP1	1.38809e-94	2.01435e-93	0.39167	0.890135	0.561728	20.5994	0.684511	0.618342	6	0.660323
CCDC28A	7.80996e-78	8.13618e-77	0.476883	0.742111	0.651235	18.6386	0.68447	0.563776	6	0.262037
WFS1	2.79608e-105	4.89374e-104	0.387951	0.932794	0.540123	21.7597	0.684443	0.620222	1	0.0589512
TRIM8	2.58671e-61	1.91916e-60	0.752824	0.64604	0.79784	16.4792	0.684339	0.634164	1	0.257857
COBL	1.08899e-75	1.08744e-74	0.498685	0.743598	0.660494	18.3726	0.684253	0.609718	6	0.480318
FBXL5	5.71413e-65	4.54455e-64	0.624092	0.660758	0.756173	16.9806	0.684141	0.604581	6	0.251848
PRDX3	6.01602e-57	4.02991e-56	1.01178	0.616802	0.881173	15.8598	0.684038	0.573214	5	0.24734
PITPNA	9.05113e-76	9.05506e-75	0.479065	0.820712	0.645062	18.3826	0.683995	0.526409	6	0.139302
DNAJB1	7.77001e-57	5.19622e-56	1.19841	0.635147	0.905864	15.8437	0.683993	0.624704	4	0.293391
TEKT3	1.73904e-143	6.16768e-142	0.307456	1.04701	0.473765	25.4778	0.683892	0.625276	5	0.362611
MSL3	4.95793e-90	6.57404e-89	0.384393	0.86654	0.570988	20.0853	0.683804	0.60743	6	0.557277
CCT6A	1.47569e-56	9.81989e-56	1.05162	0.611025	0.887346	15.8033	0.683769	0.624948	6	0.270109
TRIP11	4.30673e-65	3.44048e-64	0.650027	0.726095	0.733025	16.9972	0.683569	0.622846	6	0.500972
EPHX2	8.05799e-109	1.50152e-107	0.347575	0.988044	0.521605	22.1304	0.683409	0.625334	6	0.46114
RIMKLB	3.86409e-92	5.33859e-91	0.383856	0.812171	0.574074	20.325	0.683338	0.641601	6	0.470657
LKAAEAR1	1.34936e-141	4.62306e-140	0.467644	1.38469	0.462963	25.3067	0.683207	0.538593	1	-0.370468
REPIN1	2.01154e-69	1.75651e-68	0.558808	0.669766	0.708333	17.5722	0.683205	0.526298	6	-0.0339873
DYDC1	2.31341e-137	7.26293e-136	0.298211	1.01741	0.476852	24.919	0.68317	0.599026	6	0.390937
SLC25A36	5.14062e-66	4.17695e-65	0.677509	0.657464	0.736111	17.1214	0.683091	0.594701	1	-0.0759835
AC060780.1	4.10536e-86	5.04172e-85	0.47008	0.748616	0.614198	19.6322	0.683062	0.584691	5	0.069251
EFCAB7	3.61473e-123	8.78478e-122	0.322066	0.964902	0.5	23.5734	0.683013	0.621616	5	0.303126
NUCKS1	1.47525e-55	9.59926e-55	1.09019	0.611327	0.901235	15.6575	0.682973	0.608714	6	0.242126
TACC2	2.71183e-58	1.87172e-57	0.883781	0.610931	0.848765	16.0533	0.682912	0.605842	1	0.156493
ST13	7.24443e-53	4.40646e-52	1.60127	0.536689	0.970679	15.2583	0.682829	0.559978	5	0.268932
BOD1L1	6.20326e-79	6.58999e-78	0.466839	0.832693	0.617284	18.7736	0.682725	0.655895	6	0.747615
HLA-DMA	2.56974e-60	1.86708e-59	0.879519	0.72818	0.787037	16.3398	0.682677	0.599609	3	0.347876
SUGT1	2.35285e-60	1.71104e-59	0.752247	0.626823	0.811728	16.3452	0.68265	0.57965	6	0.198367
THADA	7.74808e-94	1.1104e-92	0.37067	0.805676	0.566358	20.516	0.682616	0.612551	6	0.346997
DDX17	2.88583e-52	1.72989e-51	1.80316	0.497132	0.983025	15.1679	0.68259	0.501237	5	0.0831961
MPZL3	1.45256e-81	1.63344e-80	0.44749	0.828576	0.608025	19.0927	0.682548	0.616267	6	0.578304
KMT2A	2.57865e-68	2.19587e-67	0.584055	0.750543	0.686728	17.4269	0.682512	0.591059	6	0.372341
SEC14L3	1.22368e-100	1.96483e-99	0.529984	1.01434	0.550926	21.264	0.682502	0.558861	5	0.0168194
STK40	8.39976e-73	7.88522e-72	0.527982	0.765841	0.662037	18.0082	0.68245	0.628919	6	0.308008
BORCS7	2.55617e-67	2.13504e-66	0.573934	0.708365	0.705247	17.2952	0.682443	0.550813	6	0.165318
RBM6	4.67942e-66	3.80604e-65	0.610397	0.630628	0.725309	17.1268	0.682401	0.584409	1	-0.14203
AMPD3	8.04098e-90	1.06358e-88	0.396933	0.834087	0.572531	20.0613	0.682311	0.622718	6	0.512476
IQCB1	1.13654e-84	1.35854e-83	0.419504	0.808324	0.592593	19.4627	0.682298	0.602393	6	0.363333
SPATS2L	2.20111e-53	1.3526e-52	1.62283	0.619286	0.962963	15.3359	0.682233	0.608358	1	0.425267
PALLD	9.20744e-67	7.58838e-66	0.635857	0.751348	0.71142	17.2212	0.682218	0.610901	4	0.270216
PPME1	2.40441e-89	3.15191e-88	0.381983	0.814797	0.574074	20.0068	0.682135	0.612677	6	0.0333196
DCAF6	1.28388e-76	1.30466e-75	0.448267	0.807884	0.626543	18.4882	0.682067	0.587656	6	0.40503
DRAM2	2.68855e-65	2.15632e-64	0.612317	0.636132	0.739198	17.0248	0.68196	0.556148	5	-0.0228677
NARS	4.80624e-60	3.46552e-59	0.728563	0.632498	0.805556	16.3016	0.681919	0.607499	6	0.308083
PEX14	9.28025e-98	1.4088e-96	0.385891	0.900674	0.54321	20.9505	0.681914	0.622449	1	0.0130098
FKBP6	3.13964e-206	5.27753e-204	0.303379	1.46913	0.410494	30.6218	0.681896	0.615052	1	0.286194
ACAP1	2.87661e-92	3.97771e-91	0.439612	0.741258	0.583333	20.3395	0.681843	0.560874	1	-0.432166
BCL7A	6.01264e-95	8.78859e-94	0.384754	0.910266	0.552469	20.6399	0.681832	0.606328	6	0.512432
SMG1	1.9412e-64	1.53104e-63	0.639019	0.665264	0.742284	16.9087	0.681751	0.611247	4	0.136297
FAM107B	1.62076e-55	1.05291e-54	1.05054	0.637543	0.887346	15.6516	0.68173	0.580825	6	0.192299
TUB	4.91748e-163	2.68086e-161	0.275261	1.17525	0.441358	27.1848	0.681714	0.61205	6	0.629267
MAT2B	1.19544e-63	9.28335e-63	0.615333	0.682237	0.743827	16.8012	0.681702	0.639296	6	0.46967
PRUNE2	1.58845e-98	2.45055e-97	0.415691	0.805395	0.563272	21.0344	0.681627	0.562817	5	-0.106376
CRY2	2.1791e-82	2.50101e-81	0.436511	0.76455	0.608025	19.1915	0.681609	0.604002	6	0.184467
ARFGEF3	3.72419e-58	2.5606e-57	0.895787	0.656858	0.822531	16.0336	0.681568	0.556648	5	0.0946249
LDLRAD4	7.42516e-104	1.26659e-102	0.337301	0.899395	0.527778	21.6088	0.681501	0.592355	6	0.397338
KDM2A	2.12371e-65	1.70669e-64	0.589077	0.714938	0.719136	17.0386	0.681486	0.600051	6	0.411802
SNAPC1	1.10151e-86	1.36417e-85	0.406125	0.773749	0.591049	19.6989	0.681444	0.548198	6	0.150265
SSBP2	5.2164e-76	5.25777e-75	0.448856	0.737458	0.634259	18.4125	0.681359	0.607439	6	0.326803
ANP32E	2.88931e-82	3.30204e-81	0.417506	0.828852	0.595679	19.1768	0.681288	0.608098	6	0.539053
EBLN3P	1.01614e-69	8.93593e-69	0.533267	0.73882	0.671296	17.6109	0.681284	0.588623	6	0.365708
ACTN1	9.13607e-68	7.69863e-67	0.54644	0.63963	0.714506	17.3544	0.681275	0.523732	6	0.0257106
RNF130	1.02476e-57	6.98038e-57	0.853766	0.653538	0.828704	15.9706	0.681268	0.558694	6	0.161563
DHX57	1.40055e-108	2.60076e-107	0.324381	0.885863	0.516975	22.1055	0.681264	0.608284	6	0.340552
ATP2B4	6.31877e-74	6.09116e-73	0.49806	0.728415	0.652778	18.1509	0.681175	0.615566	4	0.254266
HSF1	1.6364e-66	1.34316e-65	0.542917	0.680105	0.70679	17.1879	0.681097	0.59533	6	-0.0318031
CEP19	2.64253e-122	6.28945e-121	0.303881	0.972389	0.492284	23.489	0.681096	0.580166	6	0.416463
TRIM37	3.45568e-104	5.93237e-103	0.332984	0.918348	0.518519	21.6441	0.681094	0.624758	6	0.514216
STX16	9.70824e-71	8.74229e-70	0.514812	0.66539	0.675926	17.7433	0.681071	0.593383	6	0.330396
INPP5E	5.7064e-108	1.04286e-106	0.348264	0.95372	0.512346	22.0419	0.681043	0.600336	6	0.499489
RPS6KA2	3.9523e-101	6.41632e-100	0.348534	0.954891	0.523148	21.3169	0.681028	0.637046	6	0.377268
SMKR1	3.00805e-113	6.16783e-112	0.319988	0.895519	0.512346	22.5855	0.681016	0.534672	6	0.158948
EPN1	1.35724e-64	1.0752e-63	0.580178	0.706642	0.716049	16.9298	0.680993	0.601932	6	0.376733
GSTM2	2.14523e-197	2.7045e-195	0.261836	1.38468	0.408951	29.9508	0.680879	0.654487	1	0.724517
BAG6	4.79481e-59	3.36701e-58	0.733049	0.629382	0.79784	16.1604	0.680841	0.59603	6	0.273962
KPNA5	3.08281e-101	5.01486e-100	0.356066	0.866897	0.532407	21.3286	0.680789	0.638581	5	0.315266
SMARCA4	2.52216e-60	1.83334e-59	0.700304	0.644025	0.780864	16.341	0.680778	0.596604	6	0.312739
PIGT	5.46255e-61	4.02692e-60	0.641235	0.663738	0.770062	16.434	0.680664	0.585404	6	0.304673
VWA5A	2.04651e-83	2.39656e-82	0.402506	0.861581	0.580247	19.314	0.68062	0.642983	6	0.750719
MX1	7.10888e-57	4.76e-56	1.65679	0.722255	0.875	15.8493	0.680588	0.5183	4	0.0762076
AP3M2	4.81979e-132	1.36931e-130	0.303183	1.08055	0.469136	24.4234	0.680552	0.612706	6	0.66014
CCT2	1.60808e-55	1.04551e-54	0.991696	0.61267	0.871914	15.6521	0.680486	0.558013	5	0.167559
GNS	6.06449e-68	5.12639e-67	0.546241	0.740303	0.682099	17.3779	0.680284	0.561602	6	0.252602
SLIT1	2.1662e-144	7.87296e-143	0.292603	1.10126	0.45679	25.5593	0.680165	0.627033	5	0.434234
MAP3K2	2.40087e-66	1.96365e-65	0.552725	0.723222	0.688272	17.1656	0.680078	0.5869	6	0.346819
UBR4	7.05895e-67	5.83557e-66	0.556553	0.664176	0.697531	17.2366	0.680016	0.633102	4	0.186726
DEGS2	7.272e-56	4.76058e-55	1.16918	0.634803	0.876543	15.7025	0.679915	0.423711	5	-0.22854
TTC32	1.13728e-85	1.38091e-84	0.401317	0.861231	0.569444	19.5803	0.679897	0.609155	6	0.597089
SIK3	3.23766e-89	4.24076e-88	0.367789	0.834657	0.560185	19.9919	0.679896	0.612817	6	0.553414
MTMR12	5.03122e-86	6.15067e-85	0.392972	0.899735	0.560185	19.6218	0.67987	0.586454	6	0.466514
LINC00467	1.5351e-69	1.34424e-68	0.524982	0.699311	0.669753	17.5875	0.679861	0.58885	6	0.235511
RPP38	6.2276e-66	5.05252e-65	0.567597	0.659842	0.70679	17.1102	0.679849	0.586243	6	-0.111748
BTN3A2	4.14764e-87	5.20051e-86	0.398627	0.916887	0.557099	19.7483	0.67973	0.638476	6	0.575662
AKIRIN1	5.14107e-67	4.26537e-66	0.533631	0.714499	0.685185	17.2549	0.679727	0.586796	6	0.324773
PHAX	6.12867e-76	6.16958e-75	0.433443	0.81102	0.614198	18.4038	0.679719	0.616906	6	0.576003
DYDC2	9.29662e-63	7.08642e-62	0.977518	0.625501	0.83179	16.6791	0.6797	0.388969	5	-0.420706
MYO1D	3.10771e-71	2.83649e-70	0.480613	0.800554	0.638889	17.8072	0.679609	0.608505	6	0.52757
SENP6	5.21418e-65	4.15102e-64	0.551303	0.67709	0.70216	16.986	0.6796	0.625962	6	0.48164
HLA-DPB1	2.50715e-59	1.77292e-58	0.939409	0.769698	0.765432	16.2003	0.679537	0.618412	3	0.495223
FAM192A	8.69481e-71	7.84721e-70	0.492407	0.780497	0.640432	17.7495	0.67953	0.611967	6	0.528582
CENPC	5.86078e-98	8.93907e-97	0.351108	0.973392	0.521605	20.9724	0.679481	0.64482	6	0.832701
LYSMD2	3.04371e-69	2.64066e-68	0.499307	0.751923	0.657407	17.5487	0.679464	0.628987	6	0.481947
TXNRD1	9.34792e-57	6.24368e-56	0.967951	0.666089	0.848765	15.8321	0.679449	0.541139	4	0.00171788
ECHDC2	4.11813e-65	3.29144e-64	0.5782	0.695971	0.697531	16.9998	0.67938	0.634601	6	0.382119
XRN1	6.69684e-73	6.30128e-72	0.505515	0.795601	0.635802	18.0207	0.679374	0.613975	4	0.334073
LINC00326	1.04624e-123	2.58153e-122	0.338954	0.989299	0.487654	23.6258	0.679373	0.609372	5	0.254844
CSNK1G1	2.41752e-91	3.29768e-90	0.353628	0.895056	0.544753	20.2348	0.679367	0.560759	6	0.33788
CPEB4	1.50837e-66	1.23997e-65	0.554772	0.648179	0.700617	17.1926	0.679361	0.625478	6	0.384672
GALC	5.92589e-94	8.50766e-93	0.367167	0.884035	0.546296	20.529	0.679294	0.579606	6	0.313103
SPIDR	4.09824e-82	4.66056e-81	0.398602	0.845764	0.578704	19.1587	0.679262	0.610996	6	0.595703
SPPL2A	2.70724e-60	1.9661e-59	0.647361	0.618203	0.768519	16.3367	0.679237	0.619206	5	0.291479
CEP57	1.02032e-74	9.98474e-74	0.454652	0.794378	0.618827	18.2508	0.679232	0.620042	6	0.523592
AC133794.1	1.75689e-92	2.43774e-91	0.408134	0.736956	0.575617	20.3637	0.679103	0.544867	5	-0.20806
MS4A8	7.25651e-52	4.32416e-51	2.20093	0.674082	0.979938	15.1072	0.679054	0.341604	5	-0.176758
NFIX	3.94662e-70	3.49542e-69	0.490635	0.779037	0.646605	17.6643	0.678999	0.584942	6	0.382277
TFDP2	9.35116e-77	9.55061e-76	0.425378	0.819225	0.604938	18.5053	0.678896	0.583191	6	0.396658
ALDH1L1	1.11875e-79	1.20839e-78	0.512069	0.838855	0.604938	18.8644	0.678693	0.581376	6	0.137976
TMEM234	5.00111e-86	6.1185e-85	0.395862	0.804198	0.569444	19.6222	0.678686	0.576458	6	0.358593
CMPK2	6.44649e-71	5.83438e-70	0.589741	0.768576	0.660494	17.7663	0.678551	0.606981	4	0.259981
ZBTB7A	4.6965e-58	3.22226e-57	0.711683	0.625773	0.802469	16.0191	0.67849	0.618762	6	0.40339
CYSTM1	5.10619e-50	2.91883e-49	2.09677	0.513586	0.972222	14.8242	0.678465	0.489754	5	0.0937756
ZRANB2	3.4569e-64	2.71852e-63	0.578888	0.692991	0.699074	16.8746	0.678448	0.63873	6	0.503742
LRRIQ3	1.40943e-111	2.80099e-110	0.33062	0.871224	0.510802	22.4149	0.678437	0.595159	5	0.0984343
LMBRD1	3.64826e-63	2.81012e-62	0.573247	0.683396	0.712963	16.7349	0.678424	0.608494	5	0.264768
YLPM1	7.16867e-83	8.31638e-82	0.38877	0.874961	0.564815	19.2492	0.678381	0.606007	6	0.587216
RRAGA	1.02525e-56	6.83939e-56	0.765852	0.597664	0.825617	15.8263	0.678308	0.563874	5	0.108205
TRIM41	1.58404e-85	1.92048e-84	0.374213	0.81427	0.566358	19.5635	0.678255	0.589458	6	0.455574
BNIP3L	7.95682e-59	5.56564e-58	0.673184	0.649688	0.776235	16.1292	0.678192	0.585713	6	0.298516
ISCA1	3.70351e-70	3.28371e-69	0.472694	0.721291	0.655864	17.6679	0.678137	0.566423	6	0.283215
ACBD3-AS1	4.58381e-79	4.88889e-78	0.527131	0.69308	0.641975	18.7897	0.678118	0.504556	5	-0.286358
AGBL5	5.08909e-100	8.0909e-99	0.334148	0.924164	0.518519	21.197	0.678111	0.575761	6	0.421034
RETREG1	1.7207e-82	1.97912e-81	0.442473	0.826656	0.58642	19.2038	0.678106	0.604934	5	0.199208
SLC37A1	1.19448e-69	1.04929e-68	0.515217	0.787753	0.648148	17.6017	0.678069	0.600222	6	0.273289
OTUD6B-AS1	3.1007e-62	2.34691e-61	0.600895	0.669714	0.726852	16.607	0.678041	0.572216	6	0.282396
SNX14	2.6794e-70	2.38223e-69	0.474651	0.680214	0.652778	17.6862	0.677984	0.605061	6	0.180666
TCHP	1.65123e-84	1.96793e-83	0.386569	0.903342	0.558642	19.4436	0.677881	0.583811	6	0.477416
MRPS33	2.56351e-56	1.69469e-55	0.81803	0.644165	0.799383	15.7685	0.677842	0.566145	6	0.204308
EZR	4.87059e-49	2.71679e-48	3.11602	0.336661	1	14.672	0.677704	0.571683	4	0.179669
C4orf33	4.48787e-100	7.14208e-99	0.310246	0.9598	0.510802	21.2029	0.677679	0.622927	6	0.676489
PPP5C	1.36821e-77	1.41895e-76	0.406343	0.76126	0.598765	18.6086	0.677662	0.584777	6	0.379561
TUT4	5.73121e-83	6.66796e-82	0.409873	0.799308	0.570988	19.2608	0.677656	0.631696	1	0.125783
KLHDC10	3.2565e-82	3.71642e-81	0.394641	0.803677	0.578704	19.1706	0.677653	0.560938	6	0.301557
DNMT1	1.60844e-70	1.43957e-69	0.482807	0.712398	0.649691	17.7149	0.677623	0.565782	6	0.276545
NIPSNAP2	6.63921e-62	4.98775e-61	0.617849	0.669242	0.719136	16.5613	0.677598	0.572216	6	0.220804
HNRNPUL1	2.43368e-59	1.72172e-58	0.637027	0.630702	0.763889	16.2022	0.677483	0.529417	6	0.0510738
CAMSAP1	8.46489e-78	8.81277e-77	0.451494	0.846027	0.591049	18.6343	0.677389	0.576109	6	0.3943
TMEM94	1.89198e-103	3.20366e-102	0.321956	0.941509	0.503086	21.5655	0.67713	0.618355	6	0.581125
CEP250	1.60944e-101	2.63404e-100	0.336295	0.930768	0.507716	21.359	0.677016	0.611105	6	0.206753
TUSC2	4.98611e-57	3.35114e-56	0.724459	0.624838	0.790123	15.8716	0.677001	0.528755	6	0.064647
KBTBD4	6.31856e-105	1.09992e-103	0.305559	0.98393	0.496914	21.7223	0.676852	0.552769	6	0.297869
CLASP1	1.45169e-95	2.14131e-94	0.344209	0.93004	0.521605	20.7085	0.676836	0.606464	6	0.564712
CBR1	2.38054e-58	1.64658e-57	0.788301	0.753704	0.753086	16.0613	0.676761	0.586748	3	0.365327
NBR1	1.18484e-60	8.69083e-60	0.599755	0.621004	0.743827	16.387	0.676688	0.625869	6	0.365999
SERPING1	2.29691e-71	2.1024e-70	0.598379	0.960795	0.606481	17.8241	0.676554	0.61809	3	0.555111
USP8	2.01312e-59	1.42544e-58	0.618445	0.592388	0.751543	16.2138	0.676378	0.615952	6	0.28589
LONP2	5.06246e-63	3.88644e-62	0.553782	0.673142	0.695988	16.7154	0.676327	0.609336	6	0.443207
FBXL2	4.65586e-96	6.91819e-95	0.33377	0.838506	0.523148	20.7632	0.67626	0.60338	6	0.528435
ICMT	1.45615e-64	1.15242e-63	0.534642	0.749691	0.669753	16.9256	0.676185	0.591938	6	0.398918
BCCIP	8.02666e-58	5.48143e-57	0.665229	0.663071	0.756173	15.9858	0.676044	0.61881	3	0.41961
ATP13A3	4.05273e-67	3.36761e-66	0.501252	0.712965	0.655864	17.2686	0.675976	0.595754	6	0.403381
NFE2L2	2.45292e-49	1.37679e-48	1.56777	0.532158	0.958333	14.7185	0.675961	0.516452	1	0.113966
SNHG10	5.04517e-87	6.31115e-86	0.38202	0.752642	0.558642	19.7384	0.675916	0.585355	1	-0.278957
SLC34A2	4.99536e-55	3.21412e-54	1.10844	0.657517	0.830247	15.5798	0.675911	0.58986	5	0.300635
DNTTIP2	1.04168e-68	8.93651e-68	0.474312	0.713365	0.646605	17.4787	0.675862	0.61843	6	0.490926
LY75	4.5714e-93	6.42585e-92	0.340504	0.795623	0.533951	20.4295	0.675717	0.61024	5	0.137099
MED31	1.04674e-62	7.96759e-62	0.577726	0.6191	0.714506	16.672	0.675688	0.553172	6	0.0495987
CDC5L	7.20628e-66	5.8436e-65	0.485673	0.678124	0.66821	17.1017	0.675653	0.614746	6	0.356664
NAP1L1	3.17216e-49	1.77555e-48	1.62437	0.545428	0.964506	14.7011	0.675603	0.464385	5	-0.0486952
EXOSC10	3.49011e-81	3.90027e-80	0.388547	0.843101	0.561728	19.0468	0.675536	0.616482	6	0.545916
HLA-DMB	9.13912e-84	1.07413e-82	0.412302	0.915973	0.554012	19.3556	0.675535	0.607675	6	0.570552
KDM3B	7.29803e-77	7.47736e-76	0.403469	0.761216	0.589506	18.5187	0.675505	0.601704	6	0.412936
PTOV1	2.45055e-52	1.47225e-51	0.951541	0.573691	0.856481	15.1786	0.675489	0.522442	1	-0.120671
SAFB	5.59254e-63	4.2893e-62	0.539333	0.621454	0.700617	16.7095	0.675478	0.617839	1	-0.0114279
VGLL4	1.42104e-58	9.8714e-58	0.628643	0.640396	0.743827	16.0933	0.675419	0.609915	6	0.377242
USP2-AS1	1.32506e-134	3.91621e-133	0.270354	0.976602	0.45216	24.6633	0.675403	0.586642	6	-0.113423
EXOC4	7.17337e-81	7.95033e-80	0.375401	0.78906	0.566358	19.0091	0.675383	0.614875	6	0.554678
GRINA	2.41182e-55	1.56178e-54	0.81574	0.591298	0.839506	15.6263	0.675365	0.598546	1	0.0424258
CNTD1	6.28037e-111	1.22993e-109	0.420686	1.06684	0.490741	22.3482	0.675357	0.586635	5	0.172079
USP9X	3.44747e-63	2.66053e-62	0.531637	0.686503	0.686728	16.7383	0.675273	0.617773	6	0.506372
HSPA12A	5.25132e-116	1.13746e-114	0.303531	0.956152	0.476852	22.8644	0.675125	0.59695	6	0.449225
SPTAN1	1.68964e-52	1.02081e-51	0.937865	0.545979	0.87963	15.203	0.675122	0.56514	1	-0.0812655
WASHC1	3.60972e-63	2.78309e-62	0.553008	0.527261	0.703704	16.7355	0.67492	0.418176	1	-0.99084
KPNA6	3.26003e-62	2.46403e-61	0.542109	0.698223	0.689815	16.604	0.674893	0.532064	6	0.0998465
PCBP2	9.51845e-49	5.26746e-48	1.47884	0.523152	0.976852	14.6265	0.674866	0.605123	6	0.172002
SETD5	5.29036e-64	4.13817e-63	0.520716	0.686601	0.671296	16.8495	0.67483	0.6047	6	-0.0589273
MAGI1	2.88327e-78	3.02913e-77	0.394232	0.686136	0.589506	18.6919	0.674802	0.575314	6	-0.0808211
PSMB8-AS1	1.0211e-87	1.2954e-86	0.355514	0.878595	0.529321	19.819	0.674714	0.595746	6	0.574986
MRPL18	1.08026e-52	6.55096e-52	0.867419	0.603441	0.837963	15.2322	0.674627	0.55711	6	0.14526
SLFN5	8.06517e-54	5.01339e-53	0.910329	0.617505	0.837963	15.4009	0.67459	0.601191	1	0.0970351
ZFP90	6.0185e-106	1.06726e-104	0.296279	0.921323	0.489198	21.83	0.67457	0.590422	6	0.505209
FAM111A	2.88815e-75	2.85752e-74	0.422343	0.737305	0.594136	18.3196	0.674563	0.634966	6	0.352507
MRPL43	3.84423e-54	2.41567e-53	0.771675	0.615813	0.805556	15.4488	0.67455	0.585262	6	0.218382
HILPDA	1.14889e-98	1.77583e-97	0.357663	0.965733	0.506173	21.0498	0.674524	0.636388	5	0.539301
MIA	8.12391e-139	2.65375e-137	0.387568	1.28543	0.439815	25.0529	0.674414	0.631647	5	0.648549
RGL2	1.59751e-60	1.167e-59	0.57582	0.59271	0.717593	16.3688	0.674376	0.598055	6	-0.121064
SH3D19	6.2492e-69	5.38118e-68	0.490939	0.783463	0.623457	17.5078	0.674373	0.630505	6	0.469313
SCGB2A1	8.38305e-68	7.06778e-67	0.692038	0.786623	0.651235	17.3593	0.674293	0.541435	5	-0.0728247
SNTB1	5.61508e-85	6.74687e-84	0.382344	0.84457	0.546296	19.4988	0.674273	0.61738	6	0.373958
ENO4	3.83033e-127	9.8896e-126	0.281584	0.906439	0.462963	23.9578	0.674269	0.607918	5	0.177596
DDR1	4.99057e-50	2.85578e-49	1.11419	0.57097	0.91821	14.8258	0.674253	0.637403	6	0.345572
CFAP99	5.37887e-135	1.60145e-133	0.287522	0.956091	0.449074	24.6998	0.674218	0.515528	1	-0.74621
HECTD4	6.90335e-86	8.42021e-85	0.369993	0.86561	0.535494	19.6058	0.674181	0.59174	6	0.176166
MECP2	2.79301e-68	2.37589e-67	0.459298	0.726914	0.626543	17.4223	0.674178	0.61127	6	0.164469
NUB1	2.71509e-65	2.17653e-64	0.557703	0.787823	0.652778	17.0242	0.674131	0.629309	6	0.551064
CEBPZ	4.86864e-61	3.59073e-60	0.565286	0.652008	0.703704	16.441	0.674013	0.645254	3	0.579979
ANKRD28	9.19801e-63	7.01457e-62	0.562419	0.684104	0.685185	16.6798	0.67401	0.578997	6	0.335404
PTPMT1	9.65782e-57	6.44534e-56	0.647019	0.63042	0.763889	15.83	0.67391	0.570801	6	0.235726
ADSS	5.05965e-54	3.16709e-53	0.75577	0.612902	0.802469	15.4311	0.673871	0.610987	5	0.332815
GPBP1	5.14123e-51	3.01359e-50	0.941695	0.547757	0.884259	14.9776	0.673853	0.597884	5	0.29033
HACD3	1.80267e-58	1.25063e-57	0.645159	0.640054	0.743827	16.0786	0.673844	0.493637	6	-0.0277017
UBALD2	1.17758e-59	8.39338e-59	0.598265	0.612403	0.731481	16.2468	0.673831	0.600787	6	0.150392
GABARAP	1.5997e-48	8.78935e-48	1.69685	0.564569	0.91821	14.5911	0.673728	0.508694	1	0.0977062
RPAP3	1.21074e-82	1.39854e-81	0.36829	0.820775	0.550926	19.222	0.673702	0.589362	6	0.455101
AC008915.2	1.87271e-77	1.93842e-76	0.44821	0.626486	0.600309	18.5918	0.673683	0.446253	1	-0.923771
EML2	4.11857e-74	3.98449e-73	0.418407	0.75319	0.591049	18.1744	0.6736	0.650845	6	0.491273
SF3B4	6.21495e-61	4.57739e-60	0.532696	0.655155	0.694444	16.4262	0.67358	0.636818	6	0.466726
SCIN	1.33821e-84	1.59724e-83	0.381267	0.845842	0.54321	19.4544	0.673549	0.618048	6	0.682737
BAZ1B	5.93716e-67	4.91827e-66	0.469009	0.739396	0.626543	17.2466	0.673527	0.62223	6	0.551036
AL353622.1	3.19972e-93	4.5174e-92	0.367716	0.715426	0.53858	20.4469	0.673445	0.559379	5	-0.193698
ABRAXAS1	3.79663e-107	6.83774e-106	0.299224	0.936337	0.483025	21.956	0.673338	0.620153	6	0.35334
PPP2R5E	3.22474e-64	2.53842e-63	0.489351	0.692222	0.660494	16.8788	0.673333	0.596858	6	0.4055
EPHX1	1.25355e-48	6.91099e-48	1.65117	0.59015	0.924383	14.6077	0.673328	0.477742	5	0.0137209
SARAF	3.47343e-47	1.84803e-46	2.08845	0.472469	0.989198	14.3796	0.673323	0.423968	5	-0.0130504
DNAAF5	7.14939e-92	9.85224e-91	0.334429	0.851162	0.518519	20.2948	0.67324	0.558556	6	0.313852
KIAA1217	2.00428e-65	1.61312e-64	0.506751	0.758968	0.646605	17.042	0.673198	0.617907	3	0.528037
POLR2A	5.32616e-57	3.57373e-56	0.652544	0.551549	0.75	15.8674	0.673139	0.506849	1	-0.631716
FBXL13	7.98496e-170	4.99431e-168	0.253824	1.21775	0.405864	27.7531	0.673074	0.619952	6	0.540581
ADGRE5	3.77246e-61	2.7912e-60	0.637892	0.686816	0.703704	16.4564	0.673055	0.504509	6	-0.0259689
UHMK1	2.32933e-57	1.57802e-56	0.614673	0.631349	0.740741	15.9193	0.673029	0.633895	6	0.481817
CCDC89	5.40241e-137	1.67974e-135	0.295684	1.07953	0.439815	24.885	0.6729	0.617786	1	0.167369
NEK4	1.95254e-80	2.14487e-79	0.391353	0.763461	0.566358	18.9565	0.672875	0.559383	6	0.194217
HGS	3.89986e-58	2.6791e-57	0.621453	0.601108	0.733025	16.0307	0.672846	0.597173	1	-0.0964207
SDHA	1.86151e-59	1.32098e-58	0.550246	0.605559	0.717593	16.2186	0.672824	0.595921	6	0.323582
LIMK2	3.01101e-61	2.23293e-60	0.553437	0.698347	0.682099	16.4701	0.672807	0.589978	6	0.394605
AC023300.2	1.71009e-108	3.16829e-107	0.34892	0.948735	0.487654	22.0964	0.672801	0.577894	6	0.173124
U2SURP	2.35115e-55	1.5231e-54	0.692233	0.607948	0.763889	15.6279	0.672799	0.632112	5	0.391028
ELP1	6.05147e-88	7.72568e-87	0.338992	0.858929	0.524691	19.8453	0.672792	0.604877	6	0.524026
ACTR6	1.51533e-79	1.63128e-78	0.376905	0.77026	0.563272	18.8484	0.672731	0.56879	6	0.341494
HDLBP	2.08309e-48	1.14103e-47	1.33764	0.567553	0.930556	14.5731	0.672697	0.551891	6	0.0811534
TMX4	6.0896e-79	6.47778e-78	0.378309	0.761594	0.566358	18.7746	0.672689	0.557851	6	0.239563
MAP4	1.94877e-70	1.74031e-69	0.451265	0.741036	0.606481	17.7041	0.672621	0.631109	6	0.338326
MECOM	4.85471e-62	3.65735e-61	0.518371	0.69367	0.67284	16.5801	0.672616	0.599548	3	0.381359
CAPRIN1	9.17511e-56	5.99671e-55	0.66452	0.629842	0.759259	15.6877	0.672574	0.572471	6	0.201403
IFITM3	6.82907e-47	3.60369e-46	3.26375	0.558213	0.966049	14.3328	0.672495	0.502417	4	0.028483
PTBP3	7.57404e-52	4.51005e-51	0.819469	0.567596	0.845679	15.1044	0.67248	0.594197	6	0.261488
FAM219B	6.18646e-74	5.96718e-73	0.403873	0.746932	0.584877	18.152	0.672458	0.591523	6	0.464324
PARD3	2.15485e-70	1.92327e-69	0.433915	0.760023	0.601852	17.6985	0.672451	0.632566	6	0.498581
TENT4B	8.45591e-87	1.05045e-85	0.370237	0.933203	0.523148	19.7123	0.672451	0.585207	6	0.531667
WRNIP1	1.49624e-71	1.37343e-70	0.418706	0.780659	0.591049	17.8481	0.672383	0.576742	6	0.368515
RSRP1	1.12108e-49	6.34542e-49	1.06508	0.522657	0.899691	14.7713	0.672342	0.495032	1	-0.213387
NDFIP2	8.64701e-55	5.52621e-54	0.674001	0.594666	0.774691	15.5447	0.672324	0.579746	6	0.258831
SMARCA5	3.60043e-56	2.37628e-55	0.650501	0.624272	0.75	15.747	0.672321	0.619244	6	0.360392
CTBP2	3.99944e-54	2.51222e-53	0.713753	0.609607	0.790123	15.4462	0.672307	0.567727	6	0.226144
USP18	2.80182e-67	2.3378e-66	0.564135	0.822599	0.631173	17.2899	0.672307	0.599218	6	0.434781
FOXP2	3.55168e-78	3.72408e-77	0.377157	0.73695	0.566358	18.6807	0.672305	0.582308	6	0.387965
CX3CL1	9.37533e-79	9.92715e-78	0.457622	0.922247	0.557099	18.7517	0.672284	0.595698	6	0.584094
ATXN1	4.94113e-81	5.50656e-80	0.395008	0.795942	0.555556	19.0286	0.672263	0.603618	6	0.543873
PSENEN	2.05086e-47	1.09803e-46	2.17817	0.613073	0.973765	14.416	0.672236	0.329365	5	-0.216101
MLEC	3.03749e-53	1.86302e-52	0.762938	0.620334	0.810185	15.315	0.672182	0.504987	6	0.0055493
KREMEN1	5.87883e-105	1.02448e-103	0.306871	0.978047	0.479938	21.7256	0.672158	0.614173	6	0.554718
SMC3	5.6384e-67	4.67379e-66	0.466069	0.711906	0.628086	17.2496	0.67211	0.620129	6	0.332846
APOL6	6.77632e-54	4.22199e-53	0.857392	0.655486	0.794753	15.4122	0.67206	0.555197	4	0.0746433
WDR47	9.55812e-114	1.98762e-112	0.276841	0.930963	0.464506	22.6361	0.672038	0.594464	6	0.545431
SIPA1L3	1.62088e-83	1.8995e-82	0.370639	0.873161	0.532407	19.3261	0.672024	0.60365	6	0.217051
UBR2	9.06888e-76	9.06719e-75	0.405118	0.851144	0.560185	18.3825	0.671999	0.636764	6	0.775092
KIAA1257	6.42407e-138	2.06505e-136	0.264081	1.07527	0.432099	24.9703	0.671974	0.58632	6	0.577682
RPL7L1	6.23935e-61	4.59327e-60	0.528466	0.700851	0.679012	16.4259	0.671949	0.555231	6	0.235662
CYHR1	7.97319e-67	6.58799e-66	0.461121	0.644538	0.640432	17.2295	0.671876	0.604662	6	0.27673
KALRN	4.47511e-111	8.81744e-110	0.298786	0.904406	0.472222	22.3634	0.671811	0.613677	6	0.101705
SMG7	3.89851e-64	3.06132e-63	0.487151	0.700617	0.646605	16.8675	0.671796	0.578406	6	0.374774
DCBLD2	1.72953e-84	2.05822e-83	0.392889	0.808924	0.546296	19.4412	0.671776	0.594076	5	0.145848
MIA2	2.61553e-55	1.69234e-54	0.646152	0.614012	0.757716	15.6211	0.671766	0.595842	6	0.349531
KIAA0895	4.39526e-102	7.25961e-101	0.307763	0.883115	0.490741	21.4195	0.671748	0.557632	6	0.308912
DDX5	5.59525e-46	2.87733e-45	2.52768	0.345797	0.993827	14.186	0.671711	0.523032	5	0.104212
BTBD1	3.44549e-81	3.85549e-80	0.361894	0.886154	0.533951	19.0475	0.67171	0.613092	6	0.640386
UBAP2L	5.81621e-69	5.01637e-68	0.418785	0.748639	0.604938	17.5119	0.671681	0.597712	6	0.464466
MCM9	7.30878e-122	1.72935e-120	0.283032	1.08847	0.442901	23.4457	0.671346	0.616437	6	0.805566
APCDD1	5.00136e-95	7.31703e-94	0.317457	0.925475	0.498457	20.6488	0.671337	0.602646	6	0.386317
SPIRE2	1.47339e-90	1.9764e-89	0.340921	0.804635	0.516975	20.1455	0.671334	0.614986	6	0.127093
CETN2	2.68423e-48	1.46485e-47	2.26533	0.662139	0.987654	14.5558	0.671267	0.221814	5	-0.418693
USP22	6.04279e-53	3.68111e-52	0.750492	0.605119	0.790123	15.2702	0.671196	0.608169	6	0.354159
C18orf32	2.52734e-59	1.78641e-58	0.545663	0.664924	0.694444	16.1999	0.671064	0.624765	3	0.496617
GLB1L2	1.91732e-112	3.86265e-111	0.285877	0.909188	0.466049	22.5035	0.671031	0.591871	6	0.313992
MRPS24	4.55976e-73	4.31812e-72	0.445175	0.805806	0.574074	18.042	0.67103	0.582985	1	-0.191251
AC010754.1	2.02119e-147	7.74726e-146	0.268174	1.11613	0.421296	25.8304	0.670987	0.622274	6	0.557015
GIPC2	2.52269e-146	9.44517e-145	0.274021	1.21897	0.416667	25.7326	0.670984	0.621848	6	0.83683
PSMB9	2.94669e-47	1.56881e-46	1.43789	0.561178	0.924383	14.391	0.670941	0.622751	5	0.445658
PSMB8	4.27209e-47	2.26772e-46	1.39376	0.533884	0.927469	14.3653	0.670881	0.509808	1	0.0608122
HIBADH	4.07551e-64	3.19876e-63	0.467337	0.665792	0.645062	16.8649	0.670836	0.602482	5	0.168031
AFF1	1.38492e-65	1.11798e-64	0.464524	0.726673	0.631173	17.0636	0.670826	0.604103	6	0.49086
TMEM138	8.51182e-76	8.5208e-75	0.395511	0.748802	0.567901	18.3859	0.670799	0.611197	6	0.327498
NDUFC1	5.21901e-46	2.68728e-45	1.79687	0.470516	0.969136	14.1909	0.670736	0.566566	5	0.261367
PINLYP	4.83291e-101	7.81449e-100	0.311507	0.952981	0.481481	21.3075	0.670697	0.612144	6	0.412628
KIAA0753	2.34372e-117	5.18801e-116	0.280663	1.03143	0.449074	22.9998	0.670697	0.596512	6	0.582425
WBP2	8.13117e-58	5.55045e-57	0.57027	0.630136	0.71142	15.985	0.670661	0.620322	4	0.293475
CCDC160	4.72584e-86	5.79049e-85	0.350683	0.902599	0.518519	19.625	0.67064	0.543043	6	0.236774
NEBL	2.37544e-57	1.60858e-56	0.586382	0.626699	0.716049	15.918	0.670632	0.580729	6	0.296022
CCNDBP1	5.81442e-56	3.82033e-55	0.618205	0.580384	0.740741	15.7167	0.670621	0.558321	5	-0.00654964
PHF20	1.20391e-69	1.05699e-68	0.411508	0.750166	0.594136	17.6013	0.670545	0.592069	6	0.440456
GSTA1	2.51244e-46	1.30742e-45	3.19569	0.573209	0.96142	14.242	0.670522	0.367853	5	-0.177308
NPHP4	8.64694e-122	2.04298e-120	0.277593	0.97762	0.447531	23.4386	0.670492	0.589452	6	0.31804
HLA-DPA1	7.65291e-48	4.13303e-47	1.52033	0.633651	0.884259	14.4839	0.670483	0.55083	5	0.187211
UPF3A	4.01016e-56	2.64346e-55	0.626671	0.600382	0.736111	15.7402	0.670438	0.566692	6	0.17788
RALB	2.99379e-71	2.73715e-70	0.415294	0.770462	0.58642	17.8093	0.6704	0.60003	6	0.469933
SCRN1	1.1447e-76	1.16469e-75	0.373676	0.784835	0.558642	18.4944	0.670397	0.604533	6	0.461737
C12orf76	4.03431e-90	5.35375e-89	0.319193	0.84071	0.509259	20.0956	0.670337	0.590857	6	0.217904
IL20RA	1.04623e-61	7.84162e-61	0.547332	0.628917	0.680556	16.5339	0.670312	0.538602	5	-0.122508
SLC25A24	2.06283e-64	1.62618e-63	0.458077	0.737387	0.623457	16.9051	0.670285	0.620737	6	0.590532
TSPAN1	2.88661e-45	1.45748e-44	3.56815	0.384732	0.998457	14.0704	0.670253	0.465907	5	0.0181803
PTK2	5.13181e-60	3.69531e-59	0.517791	0.646491	0.680556	16.2976	0.670236	0.649515	6	0.522784
NDUFV3	3.06216e-50	1.76416e-49	0.834247	0.560352	0.841049	14.8585	0.670172	0.566239	1	0.00780407
XPO1	7.87166e-53	4.78437e-52	0.710946	0.556157	0.805556	15.2529	0.670085	0.618443	6	0.377091
ASXL2	3.03925e-71	2.77557e-70	0.412357	0.7237	0.58642	17.8084	0.670064	0.590869	6	0.323127
AL035701.1	3.5271e-111	6.96657e-110	0.306325	1.05188	0.45679	22.374	0.670046	0.603184	6	0.510206
HERC6	4.63046e-61	3.41664e-60	0.606953	0.697904	0.685185	16.444	0.67001	0.575484	3	0.180644
OCEL1	9.7277e-60	6.95815e-59	0.581592	0.601254	0.705247	16.2585	0.669986	0.553908	5	-0.0060052
SNRK	7.95997e-89	1.03422e-87	0.319155	0.869753	0.509259	19.947	0.669959	0.595293	6	0.52103
LINC00284	4.31439e-194	5.04502e-192	0.219635	1.26371	0.381173	29.6961	0.669922	0.655196	6	1.02387
PAFAH1B1	3.34373e-52	2.00214e-51	0.725639	0.598739	0.78858	15.1582	0.669863	0.628484	6	0.437425
KHDRBS1	1.82584e-48	1.00148e-47	0.99237	0.567909	0.865741	14.5821	0.669855	0.60789	6	0.250365
GGA1	3.26035e-64	2.5652e-63	0.471476	0.642973	0.640432	16.8781	0.669819	0.592483	6	0.199678
EPB41L4A	1.17852e-75	1.17539e-74	0.367631	0.789577	0.560185	18.3683	0.669752	0.607343	6	0.535406
ZBTB4	4.63735e-73	4.38902e-72	0.396336	0.803452	0.569444	18.0411	0.669684	0.544411	6	0.270473
CTSL	3.72592e-57	2.51149e-56	0.73871	0.399268	0.75	15.8898	0.669668	0.623708	4	-0.0482591
C1orf141	4.82665e-136	1.46958e-134	0.326575	1.24509	0.424383	24.797	0.669605	0.618157	6	0.739464
TMEM243	1.11922e-63	8.70822e-63	0.456901	0.722542	0.62963	16.8051	0.669598	0.58045	6	0.374419
SAA2	2.28643e-79	2.44831e-78	0.861719	1.34308	0.524691	18.8266	0.669565	0.568443	6	0.767738
FABP6	3.48894e-58	2.4009e-57	1.14786	0.660157	0.759259	16.0376	0.669523	0.418377	5	-0.394933
PRPF8	7.19453e-54	4.47909e-53	0.649563	0.563778	0.763889	15.4083	0.669519	0.607462	6	0.240087
KIAA0319	8.2699e-140	2.75726e-138	0.262764	1.04692	0.42284	25.1438	0.66943	0.620643	6	0.502708
GBF1	3.29332e-76	3.3236e-75	0.358661	0.792136	0.54784	18.4374	0.669252	0.608616	6	0.414334
B3GNT7	1.18448e-55	7.73219e-55	0.669852	0.676791	0.719136	15.6715	0.669188	0.607393	6	0.461706
ABCA5	2.01091e-52	1.21173e-51	0.832713	0.514302	0.819444	15.1916	0.669137	0.425929	5	-0.401754
ZNF33B	2.89172e-80	3.1615e-79	0.363841	0.804667	0.537037	18.9358	0.669082	0.610086	6	0.377042
COPB2	1.33024e-50	7.71883e-50	0.742998	0.563049	0.816358	14.9143	0.669074	0.619514	6	0.362628
IDNK	7.75243e-99	1.20637e-97	0.299882	0.928472	0.479938	21.0684	0.669008	0.605781	6	0.483838
KRIT1	5.03228e-70	4.4472e-69	0.409466	0.756714	0.580247	17.6506	0.669003	0.60805	6	0.503574
LPGAT1	1.17319e-64	9.30764e-64	0.455498	0.69309	0.617284	16.9383	0.668837	0.589095	6	0.418063
GALK2	2.72706e-75	2.69979e-74	0.376957	0.684488	0.564815	18.3227	0.668815	0.582166	6	0.124283
FAM53B	2.16894e-85	2.6237e-84	0.325482	0.80098	0.516975	19.5474	0.668787	0.558661	6	0.313417
SUGP2	1.25778e-64	9.97382e-64	0.467357	0.654384	0.628086	16.9342	0.668729	0.543066	6	0.158742
RGS12	7.05837e-67	5.83557e-66	0.450541	0.722809	0.606481	17.2366	0.668726	0.607176	6	0.477277
TTC5	3.38171e-87	4.25005e-86	0.340854	0.825173	0.516975	19.7586	0.668724	0.57726	6	0.220951
C6orf226	2.54766e-69	2.21506e-68	0.404913	0.696401	0.597222	17.5588	0.668723	0.591587	6	0.265326
HMGB2	2.19539e-56	1.45551e-55	0.67899	0.552922	0.739198	15.7783	0.668682	0.553358	5	0.0228978
PIAS3	1.28059e-66	1.05325e-65	0.440593	0.721074	0.604938	17.2021	0.66868	0.585082	6	0.399765
ABHD2	4.25004e-46	2.19747e-45	1.41298	0.552607	0.962963	14.2052	0.668606	0.588558	6	0.198503
ISCA2	3.66581e-55	2.36337e-54	0.594282	0.627442	0.717593	15.5995	0.66858	0.532444	6	0.090726
CLU	1.68557e-44	8.29523e-44	2.88599	0.426429	0.992284	13.9451	0.668576	0.460264	5	-0.00537165
LMAN1	4.9996e-49	2.78779e-48	0.89974	0.558005	0.851852	14.6702	0.668515	0.585823	6	0.228016
PRR15	2.46766e-49	1.38459e-48	0.997712	0.609763	0.856481	14.7181	0.66849	0.529546	6	0.0744842
PMM1	2.60679e-65	2.09178e-64	0.473937	0.646666	0.631173	17.0266	0.668481	0.601808	6	-0.0651958
USP21	3.36347e-101	5.46589e-100	0.291844	0.961921	0.467593	21.3245	0.668431	0.598539	6	0.455043
NEK7	2.25553e-60	1.64249e-59	0.488558	0.643748	0.666667	16.3478	0.668424	0.623805	4	0.349012
CD2AP	1.09412e-56	7.29577e-56	0.572942	0.647807	0.70216	15.8222	0.668343	0.607418	4	0.263853
MTMR2	6.54312e-88	8.34016e-87	0.317542	0.900527	0.5	19.8414	0.668308	0.567043	6	0.435734
MTX1	5.45588e-55	3.50763e-54	0.611548	0.606804	0.725309	15.5741	0.668284	0.557012	6	0.190267
PASK	2.4903e-110	4.82424e-109	0.269773	0.851138	0.458333	22.2866	0.668225	0.571216	6	0.12066
DIS3L2	2.50354e-91	3.40926e-90	0.298431	0.86903	0.492284	20.2331	0.668156	0.579846	6	0.495852
FAM183A	9.39163e-47	4.93979e-46	2.89477	0.729361	0.993827	14.3106	0.668128	0.259876	5	-0.241873
USP34	1.68156e-57	1.14158e-56	0.518817	0.60925	0.685185	15.9396	0.668094	0.606205	6	0.438207
HMGN5	5.50478e-81	6.12203e-80	0.363219	0.753481	0.537037	19.023	0.668081	0.592009	5	0.0422725
DPY19L2	3.36445e-120	7.76711e-119	0.312181	1.01926	0.441358	23.2821	0.668045	0.602053	6	0.163124
TAF15	5.67539e-56	3.7305e-55	0.574913	0.618213	0.703704	15.7182	0.668018	0.59079	6	0.0668825
NASP	4.70558e-59	3.30723e-58	0.516608	0.560252	0.685185	16.1616	0.667963	0.596585	6	0.0440753
IFITM1	3.33886e-49	1.86691e-48	2.46222	0.704838	0.845679	14.6976	0.66796	0.498245	4	-0.011853
PRDX5	5.60348e-44	2.71787e-43	4.24674	0.430965	0.998457	13.8591	0.667866	0.283931	5	-0.143415
DEDD2	1.08491e-67	9.11832e-67	0.419141	0.683277	0.598765	17.3445	0.667866	0.612178	6	0.485804
GRM7	3.83178e-142	1.33262e-140	0.252261	1.06439	0.415123	25.3563	0.667849	0.614238	6	0.425116
MRPL40	1.11542e-47	5.99782e-47	1.05538	0.56753	0.850309	14.458	0.667772	0.480609	5	-0.0483235
AGL	5.01757e-88	6.44654e-87	0.319452	0.872391	0.498457	19.8547	0.667727	0.632712	6	0.561096
AHCTF1	2.54677e-83	2.97591e-82	0.33351	0.85478	0.512346	19.3027	0.667664	0.609455	6	0.625451
AC105446.1	3.29348e-71	3.00435e-70	0.665882	0.844659	0.591049	17.8039	0.667583	0.535204	6	0.0160004
AP2A1	3.10178e-70	2.7517e-69	0.379511	0.78223	0.564815	17.6779	0.667496	0.59504	6	0.486035
DSE	4.17598e-81	4.66029e-80	0.348416	0.766788	0.527778	19.0374	0.667494	0.641027	6	0.52246
PPP1R7	1.52155e-50	8.80991e-50	0.779153	0.588889	0.779321	14.9053	0.667486	0.559034	6	0.16488
NDUFAB1	4.34852e-45	2.18061e-44	1.44623	0.510249	0.941358	14.0414	0.667468	0.498153	5	0.0938358
TRAPPC8	5.29311e-74	5.11467e-73	0.375245	0.750082	0.554012	18.1606	0.667461	0.578698	6	0.41101
GLG1	1.68943e-56	1.12145e-55	0.522652	0.581998	0.703704	15.7948	0.667461	0.598616	6	0.396274
ZBTB18	3.35271e-91	4.54262e-90	0.318457	0.869391	0.49537	20.2187	0.667363	0.569337	6	0.295406
EEF2K	7.9934e-80	8.65701e-79	0.347314	0.81542	0.530864	18.8822	0.667323	0.568089	6	0.382176
ERLEC1	9.74581e-49	5.38774e-48	0.873838	0.601722	0.82716	14.6249	0.667277	0.525494	6	0.0556133
LMO7-AS1	1.03792e-138	3.3768e-137	0.259978	1.18634	0.407407	25.0431	0.66715	0.612355	6	0.750966
DENND4A	1.34765e-85	1.63511e-84	0.340786	0.813015	0.507716	19.5717	0.667067	0.612231	1	-0.0465347
NFIB	3.52715e-53	2.16006e-52	0.647076	0.594187	0.740741	15.3052	0.667024	0.600585	6	0.230293
PSMA6	1.00082e-55	6.53853e-55	0.716134	0.649461	0.720679	15.6822	0.666993	0.525246	4	-0.0752573
TC2N	3.32626e-50	1.9129e-49	0.731337	0.580756	0.800926	14.853	0.666973	0.61029	6	0.350409
COPRS	6.24415e-49	3.47215e-48	1.01243	0.544165	0.868827	14.6551	0.666943	0.414239	5	-0.289493
KMT5B	1.85318e-60	1.35194e-59	0.475686	0.634485	0.649691	16.3598	0.666922	0.604627	6	0.280062
CDC42BPB	6.24686e-67	5.17217e-66	0.415148	0.786684	0.58179	17.2436	0.666852	0.600416	6	0.576879
RSAD2	1.36951e-53	8.46736e-53	1.01372	0.566852	0.777778	15.3667	0.666841	0.510385	4	-0.217669
AZI2	5.84571e-56	3.83933e-55	0.54052	0.59065	0.695988	15.7163	0.666818	0.577389	6	0.273527
SUN1	4.40921e-46	2.27903e-45	1.16543	0.525262	0.927469	14.2027	0.666766	0.556314	1	0.056473
AKR7A2	4.06482e-51	2.38697e-50	0.736001	0.554669	0.785494	14.9932	0.666764	0.469357	6	-0.169362
REST	5.53485e-58	3.791e-57	0.537685	0.679124	0.657407	16.0089	0.666749	0.606716	6	0.467419
DLG3	3.19722e-72	2.97027e-71	0.374298	0.860282	0.544753	17.9341	0.666601	0.538899	6	0.250845
PREPL	2.98731e-73	2.84403e-72	0.359618	0.726754	0.555556	18.0653	0.666583	0.568982	6	0.328568
PRRG4	1.76709e-52	1.0664e-51	0.658712	0.570581	0.766975	15.2	0.666561	0.610507	4	0.232543
NUDT5	1.78859e-53	1.10246e-52	0.595179	0.555652	0.734568	15.3494	0.666553	0.579265	5	0.091088
PANK2	6.5222e-65	5.18467e-64	0.423361	0.728421	0.595679	16.9729	0.666504	0.6149	6	0.603835
NT5C3A	9.26181e-52	5.50489e-51	0.742612	0.585182	0.782407	15.0911	0.666495	0.631079	4	0.325227
RHBDD2	1.24869e-49	7.05784e-49	0.731312	0.551771	0.808642	14.7641	0.666486	0.565517	6	0.015002
CIDEB	3.29107e-125	8.29813e-124	0.250876	1.00712	0.425926	23.7715	0.666479	0.601322	6	0.50667
GLIPR2	7.42338e-51	4.33555e-50	0.715753	0.595892	0.785494	14.9532	0.666466	0.579241	6	0.274145
AHNAK2	1.63797e-62	1.24444e-61	0.560623	0.766172	0.625	16.6453	0.666409	0.59841	4	0.249392
TTC3	1.52111e-47	8.16843e-47	0.922255	0.572188	0.858025	14.4367	0.666372	0.543298	6	0.112252
FOXA1	7.8947e-48	4.26076e-47	0.903515	0.581344	0.847222	14.4818	0.666316	0.584489	6	0.235114
ZNF264	2.99756e-68	2.54588e-67	0.430673	0.694475	0.589506	17.4183	0.666217	0.550786	6	0.13034
AC008035.1	3.61879e-144	1.30641e-142	0.2509	1.10223	0.407407	25.5392	0.666201	0.628917	5	0.587613
AL451165.2	2.62169e-70	2.3322e-69	0.407267	0.718	0.569444	17.6874	0.666187	0.59289	1	-0.193275
GRHL2	8.69229e-86	1.05942e-84	0.3188	0.861114	0.49537	19.594	0.666148	0.617368	6	0.425363
DMTN	5.01806e-93	7.03531e-92	0.284588	0.929164	0.475309	20.425	0.666148	0.558788	6	0.376716
MOB1A	1.94116e-48	1.06437e-47	0.804004	0.552477	0.833333	14.5779	0.666114	0.601629	6	0.282872
GOLGA2	2.37569e-54	1.50104e-53	0.582312	0.64227	0.699074	15.4798	0.666066	0.603357	6	0.449907
SDC4	6.36001e-45	3.16666e-44	1.26468	0.528555	0.941358	14.0144	0.665965	0.590752	5	0.319657
ATR	1.03761e-88	1.34705e-87	0.320995	0.837246	0.492284	19.9337	0.665734	0.605123	6	0.525385
LRRFIP1	4.56495e-44	2.21948e-43	1.45572	0.50918	0.945988	13.8738	0.665726	0.594233	4	0.33755
COA5	2.05953e-58	1.42761e-57	0.482916	0.674012	0.648148	16.0703	0.665704	0.550651	6	0.195427
RBM24	2.6838e-111	5.31392e-110	0.292168	0.945414	0.450617	22.3862	0.665678	0.59431	6	0.24314
RSPH10B2	1.10634e-168	6.61222e-167	0.230473	1.14926	0.385802	27.6584	0.665591	0.607403	6	0.320014
DYRK2	6.04338e-72	5.57269e-71	0.365945	0.716576	0.557099	17.8986	0.665548	0.580972	6	0.310185
ADA2	3.03924e-110	5.85952e-109	0.299963	1.08589	0.436728	22.2777	0.665338	0.619077	6	0.859687
DDAH1	5.21375e-60	3.75264e-59	0.475078	0.622913	0.648148	16.2966	0.665322	0.515797	6	0.067058
CIITA	1.45561e-111	2.8892e-110	0.310985	1.09443	0.436728	22.4134	0.665318	0.625683	6	0.679461
ACAP2	1.92169e-53	1.1827e-52	0.585623	0.615219	0.716049	15.3447	0.665302	0.606998	6	0.425984
CDK13	1.02677e-58	7.15725e-58	0.48016	0.591163	0.652778	16.1134	0.665274	0.604879	6	-0.00431768
TCP1	4.68305e-47	2.48097e-46	0.886109	0.548238	0.853395	14.3589	0.665267	0.559137	5	0.152176
PPM1H	1.96249e-72	1.83268e-71	0.382684	0.803542	0.540123	17.9612	0.66516	0.571043	6	0.224375
PRDM2	4.98937e-64	3.90463e-63	0.423928	0.677741	0.601852	16.853	0.66515	0.611902	6	0.529689
NCK2	3.99069e-65	3.19275e-64	0.421301	0.749871	0.58642	17.0017	0.665145	0.554663	6	0.294417
RNF32	1.90184e-129	5.1929e-128	0.246417	1.03809	0.415123	24.1779	0.665024	0.58465	6	0.563352
SELENOW	1.01171e-42	4.75283e-42	2.37163	0.397291	0.989198	13.6498	0.664977	0.539707	5	0.153587
AC125611.4	1.22259e-141	4.19765e-140	0.248156	1.0747	0.405864	25.3105	0.664974	0.614996	6	0.445656
USP16	7.73214e-49	4.28775e-48	0.721021	0.546745	0.79784	14.6406	0.664935	0.592019	6	0.282502
OXTR	6.63852e-79	7.04775e-78	0.532264	0.964785	0.526235	18.77	0.664923	0.582373	5	0.233475
MRVI1-AS1	4.37378e-114	9.16619e-113	0.288205	0.981974	0.439815	22.6706	0.664905	0.58484	6	0.402077
LIMCH1	1.0847e-65	8.77822e-65	0.426503	0.654218	0.600309	17.0779	0.664716	0.560464	6	0.127871
PYCR2	7.3694e-60	5.28299e-59	0.494768	0.643531	0.635802	16.2755	0.664712	0.565419	6	0.105372
SF1	3.22463e-45	1.62359e-44	1.0277	0.509461	0.912037	14.0626	0.66468	0.471742	1	-0.262177
TMED4	3.24802e-50	1.86923e-49	0.649259	0.59319	0.75463	14.8546	0.66464	0.584621	6	0.300059
RANBP10	3.96641e-88	5.10822e-87	0.305878	0.845053	0.481481	19.8665	0.664581	0.595683	1	-0.17857
CFAP206	2.4763e-68	2.10982e-67	0.465432	0.576294	0.614198	17.4292	0.664517	0.481373	5	-0.451936
PUDP	2.93096e-72	2.72762e-71	0.351614	0.782982	0.540123	17.9389	0.66449	0.592332	6	0.404368
SIN3A	9.63661e-69	8.27599e-68	0.371779	0.713816	0.569444	17.4831	0.664479	0.578452	6	0.383117
SPSB1	6.24687e-63	4.78888e-62	0.421077	0.663711	0.612654	16.7029	0.66445	0.588863	6	0.40401
MBTPS1	5.77162e-53	3.51725e-52	0.571908	0.612491	0.70216	15.2732	0.664214	0.520363	6	0.0550848
STK11IP	8.9828e-80	9.72203e-79	0.356226	0.751739	0.518519	18.876	0.664127	0.558893	6	0.238355
PLSCR1	7.1541e-46	3.67077e-45	1.21417	0.555078	0.902778	14.1687	0.664078	0.457928	4	-0.168089
PTPRU	4.75125e-65	3.78996e-64	0.410178	0.711719	0.580247	16.9914	0.664072	0.621338	6	0.367507
TMTC3	4.61519e-75	4.54672e-74	0.333351	0.779369	0.529321	18.294	0.664064	0.577114	6	0.443503
MPP7	5.78951e-78	6.04303e-77	0.335516	0.841062	0.513889	18.6546	0.664017	0.600575	6	0.471156
SNX13	4.43742e-77	4.56967e-76	0.328199	0.778358	0.521605	18.5455	0.663968	0.596003	6	0.504663
SLTM	7.63435e-46	3.91221e-45	0.902484	0.53012	0.862654	14.1642	0.663964	0.611926	5	0.349772
SCAF1	5.0265e-63	3.86067e-62	0.402573	0.614196	0.603395	16.7158	0.663947	0.59593	1	-0.20766
PFDN6	1.16438e-48	6.42157e-48	0.74317	0.475428	0.802469	14.6128	0.663886	0.502058	1	-0.450758
EBNA1BP2	1.30067e-49	7.34651e-49	0.675143	0.542635	0.776235	14.7613	0.663856	0.535609	6	0.100174
GSE1	8.48946e-69	7.29858e-68	0.372332	0.646163	0.570988	17.4903	0.66378	0.592355	6	0.352463
SYS1	2.94667e-63	2.2795e-62	0.407678	0.669641	0.603395	16.7476	0.663762	0.51171	6	0.0459577
CNOT9	1.18109e-70	1.0618e-69	0.366474	0.771578	0.540123	17.7323	0.663693	0.577013	6	0.426449
PAPOLA	1.38279e-43	6.63714e-43	1.22427	0.504273	0.939815	13.7941	0.663668	0.527801	5	0.155892
NSMCE1	9.99567e-51	5.81052e-50	0.669229	0.586109	0.736111	14.9334	0.663658	0.537754	5	-0.0200392
HINT2	3.04351e-47	1.61983e-46	0.831291	0.547918	0.805556	14.3888	0.663589	0.566562	5	0.169691
SEPT7	6.02879e-46	3.0983e-45	0.899365	0.532668	0.830247	14.1807	0.663541	0.547385	5	0.0995967
THYN1	4.03089e-59	2.83674e-58	0.466065	0.63366	0.631173	16.1711	0.663505	0.563011	6	0.138768
FAM92A	1.24538e-84	1.48754e-83	0.319647	0.84085	0.493827	19.4581	0.663436	0.516167	6	0.0992664
DCDC2	1.13501e-121	2.67381e-120	0.254594	0.998084	0.421296	23.427	0.66342	0.591652	6	0.474848
CEP104	8.78736e-74	8.41553e-73	0.339206	0.736998	0.530864	18.1327	0.663365	0.581257	6	0.362577
ZCRB1	1.46723e-48	8.07805e-48	0.720019	0.602116	0.768519	14.597	0.663315	0.483541	6	-0.0589198
FLOT2	2.14092e-71	1.96073e-70	0.364224	0.806011	0.53858	17.828	0.663287	0.591328	6	0.513398
PHACTR4	7.44677e-51	4.34763e-50	0.648844	0.586231	0.74537	14.953	0.663199	0.604458	6	0.292505
CAP2	1.03486e-85	1.25749e-84	0.32018	0.791511	0.496914	19.5852	0.66316	0.591447	6	0.188192
MFSD14B	3.84073e-61	2.84041e-60	0.408251	0.647067	0.611111	16.4553	0.663096	0.516561	6	0.0564206
TOP2B	5.74878e-57	3.8541e-56	0.470277	0.590187	0.655864	15.8626	0.663065	0.57208	6	0.174297
ECI2	2.48849e-75	2.46967e-74	0.400443	0.786255	0.535494	18.3277	0.662982	0.57001	5	0.0105671
FAM86B1	9.70578e-148	3.74694e-146	0.243608	1.17054	0.388889	25.8587	0.662953	0.610888	6	0.741499
COA3	1.59393e-44	7.85623e-44	1.05283	0.548998	0.859568	13.9491	0.662948	0.539113	5	0.126028
DAAM1	1.14465e-51	6.79586e-51	0.596359	0.526094	0.736111	15.0772	0.662914	0.610065	6	0.218998
AC004130.1	1.29726e-67	1.08861e-66	0.392652	0.522826	0.574074	17.3342	0.662784	0.484997	1	-1.1163
AHI1	2.00633e-59	1.42125e-58	0.492725	0.488502	0.638889	16.214	0.6627	0.457381	1	-1.01956
TSPAN3	4.49728e-42	2.07647e-41	1.92898	0.489224	0.981481	13.5407	0.662619	0.582948	3	0.204073
KDM1A	3.0862e-69	2.67609e-68	0.355198	0.69895	0.550926	17.5479	0.662438	0.534091	6	0.100661
WBP11	4.30381e-56	2.83587e-55	0.491069	0.654914	0.648148	15.7357	0.662417	0.497708	6	-0.0548099
NUPR1	1.44257e-42	6.74746e-42	1.836	0.453109	0.95679	13.624	0.662289	0.19542	1	-0.923359
ZMYM4	5.40651e-74	5.22111e-73	0.328588	0.819016	0.515432	18.1594	0.662251	0.601948	6	0.616797
MROH9	1.90336e-137	5.99891e-136	0.264368	1.04519	0.402778	24.9269	0.662216	0.610144	5	0.322119
XRCC1	3.40364e-71	3.10133e-70	0.362809	0.665413	0.549383	17.8021	0.662206	0.543515	6	0.114681
LRRC8B	1.9234e-73	1.83331e-72	0.358046	0.823032	0.523148	18.0896	0.66218	0.563162	6	0.366862
UBE3D	7.28201e-95	1.06344e-93	0.299875	0.860032	0.466049	20.6307	0.66211	0.588113	6	0.131034
IP6K1	3.45007e-72	3.20148e-71	0.349099	0.715232	0.533951	17.9298	0.662025	0.556676	6	0.0796892
C2orf81	4.55042e-77	4.68006e-76	0.388046	0.685655	0.535494	18.5441	0.662013	0.537584	6	-0.215539
TRPT1	6.91786e-55	4.43518e-54	0.512186	0.627028	0.655864	15.5589	0.661959	0.594522	6	0.388887
EPS8	3.20471e-46	1.6607e-45	0.851673	0.55248	0.83642	14.225	0.661955	0.607907	4	0.292989
ATP13A1	9.21018e-64	7.17993e-63	0.407321	0.682892	0.580247	16.8167	0.661933	0.596501	6	0.231419
REV1	1.20565e-65	9.75214e-65	0.383658	0.664234	0.567901	17.0717	0.661913	0.626134	6	0.205978
NRP2	8.45276e-51	4.92605e-50	0.610299	0.594588	0.734568	14.9445	0.661883	0.582948	6	0.312993
COX19	1.80228e-63	1.39622e-62	0.383132	0.638579	0.58179	16.7769	0.661663	0.609568	6	0.383234
SBNO1	2.95477e-60	2.14298e-59	0.419646	0.592751	0.615741	16.3313	0.661567	0.56718	6	0.245782
PPP1R10	4.41527e-55	2.84201e-54	0.517589	0.578489	0.655864	15.5877	0.661554	0.477976	1	-0.744233
POGZ	2.33688e-58	1.61708e-57	0.454673	0.603177	0.626543	16.0625	0.661551	0.584996	6	0.39006
AFTPH	1.75343e-54	1.11179e-53	0.505382	0.62615	0.652778	15.4993	0.661543	0.584003	6	0.389844
ICK	4.35971e-70	3.85917e-69	0.352897	0.843281	0.527778	17.6587	0.661505	0.555592	6	0.321033
GFOD2	5.44424e-73	5.14366e-72	0.350816	0.718589	0.529321	18.0322	0.661466	0.541189	6	0.0998939
TMEM120B	2.29205e-78	2.41271e-77	0.363163	0.778577	0.506173	18.7041	0.661334	0.589876	5	0.0652006
PPIL4	1.64794e-63	1.27727e-62	0.410155	0.759923	0.564815	16.7822	0.661298	0.594942	6	0.408996
ELF2	1.99058e-59	1.41072e-58	0.424171	0.643312	0.604938	16.2145	0.661266	0.605441	6	0.4506
TCTN3	1.19303e-70	1.07193e-69	0.340384	0.746189	0.533951	17.7317	0.661235	0.565696	6	0.374738
SGK3	4.16658e-84	4.93295e-83	0.304839	0.867383	0.478395	19.3961	0.661135	0.581629	6	0.472131
FOXP1	4.50805e-46	2.32885e-45	0.820617	0.499862	0.82716	14.2011	0.661133	0.527142	6	-0.0552859
ATRX	1.28936e-46	6.75752e-46	0.769161	0.571159	0.776235	14.2886	0.66111	0.619354	5	0.347169
NUFIP2	3.23282e-50	1.86115e-49	0.577785	0.539314	0.725309	14.8549	0.66103	0.561916	6	0.207024
DHRS4-AS1	2.12865e-88	2.74801e-87	0.303551	0.864554	0.472222	19.8977	0.661026	0.578519	6	0.252684
SUPT5H	5.94964e-50	3.39136e-49	0.574292	0.535002	0.733025	14.814	0.661015	0.556964	6	0.200343
PRKD2	8.3151e-61	6.10745e-60	0.433185	0.682448	0.594136	16.4085	0.660967	0.609516	6	0.533945
ZFHX3	1.04546e-58	7.28121e-58	0.438975	0.615323	0.617284	16.1123	0.660827	0.586414	6	0.239112
KIF24	5.45756e-136	1.65542e-134	0.229773	1.01159	0.396605	24.7921	0.660827	0.545861	6	0.156053
DHX9	3.30656e-50	1.90225e-49	0.574512	0.546083	0.725309	14.8534	0.660816	0.575936	6	0.182678
MBNL2	4.4394e-58	3.04716e-57	0.444098	0.631155	0.621914	16.0226	0.660593	0.576903	6	0.350805
SF3A1	1.80354e-58	1.2507e-57	0.417342	0.678053	0.604938	16.0786	0.660522	0.574669	6	0.352051
POLI	2.39821e-95	3.51498e-94	0.277112	0.857606	0.455247	20.6843	0.660505	0.599251	6	0.380457
AL163051.1	1.07285e-111	2.13471e-110	0.284075	0.999289	0.424383	22.427	0.660495	0.607865	6	0.411267
PRPF40A	5.7803e-45	2.88604e-44	0.815233	0.545369	0.819444	14.0212	0.66049	0.603005	6	0.285178
AHCYL1	7.23381e-49	4.01693e-48	0.596441	0.559297	0.751543	14.6452	0.660481	0.542175	6	0.133833
MROH1	9.64328e-69	8.27732e-68	0.365454	0.73892	0.53858	17.4831	0.660447	0.584074	6	0.476693
TM9SF1	4.52547e-83	5.26894e-82	0.313437	1.00127	0.467593	19.273	0.660432	0.614209	3	0.747837
MYO15B	1.54176e-93	2.19588e-92	0.293002	0.787342	0.45679	20.4825	0.66041	0.561446	6	-0.524133
SRSF5	3.31296e-41	1.49667e-40	1.4464	0.476123	0.967593	13.3932	0.660378	0.513383	5	0.120817
MAVS	6.65859e-61	4.89743e-60	0.405168	0.707064	0.580247	16.422	0.660296	0.580898	6	0.437153
NEDD4L	6.61552e-45	3.29185e-44	0.832532	0.491034	0.844136	14.0116	0.660275	0.581701	1	0.0230099
HIST2H2AA4	9.60686e-71	8.65583e-70	0.413206	0.63929	0.537037	17.7439	0.660248	0.441247	1	-1.11334
SHOC2	3.36121e-54	2.11461e-53	0.487608	0.623978	0.649691	15.4574	0.660178	0.558542	6	0.222758
SLC11A2	8.26629e-64	6.45346e-63	0.389323	0.714261	0.563272	16.8231	0.660147	0.58275	6	0.462613
TNFRSF14-AS1	1.13684e-76	1.15742e-75	0.34213	0.757915	0.50463	18.4948	0.660146	0.60528	1	-0.0650784
TBC1D20	8.02975e-67	6.63132e-66	0.343393	0.683353	0.54784	17.2291	0.660009	0.581662	6	0.335159
ACO2	3.08398e-49	1.72739e-48	0.587246	0.570304	0.717593	14.703	0.66	0.565187	6	0.224626
SNW1	1.25985e-53	7.80129e-53	0.495475	0.603166	0.657407	15.3721	0.659988	0.575132	6	0.301085
PRPS1	2.42155e-70	2.15893e-69	0.354045	0.770391	0.527778	17.6919	0.659826	0.569798	6	0.350182
PSD3	4.17074e-60	3.01268e-59	0.442485	0.666997	0.591049	16.3103	0.659797	0.612422	6	0.31461
UBXN7	5.59938e-75	5.50288e-74	0.309574	0.721634	0.512346	18.2835	0.65979	0.574481	6	0.377233
ARHGAP5	2.08068e-48	1.1401e-47	0.628285	0.551589	0.746914	14.5732	0.659746	0.600867	4	0.21318
SGMS2	4.88183e-48	2.65336e-47	0.70268	0.598045	0.75463	14.5148	0.659741	0.564101	6	0.261676
EPRS	6.04464e-54	3.77486e-53	0.503977	0.651797	0.646605	15.4196	0.659733	0.603837	3	0.442019
PRRC2C	2.38178e-43	1.13712e-42	1.00151	0.528516	0.867284	13.7548	0.659641	0.569065	4	0.150104
CYTH1	1.05526e-50	6.12985e-50	0.550823	0.566138	0.699074	14.9298	0.659633	0.591867	6	0.239171
ABAT	2.69552e-110	5.21554e-109	0.261791	1.12039	0.412037	22.2831	0.659564	0.609341	6	0.862157
CBX3	7.01958e-47	3.703e-46	0.672478	0.546038	0.768519	14.3309	0.659507	0.599355	6	0.33598
TCEAL3	2.69288e-52	1.61603e-51	0.548223	0.597487	0.675926	15.1724	0.659457	0.530954	6	0.120304
LRRC58	1.72375e-69	1.50683e-68	0.34672	0.775903	0.524691	17.581	0.659441	0.575214	6	0.427511
SRPK2	1.57382e-52	9.51187e-52	0.493594	0.582513	0.66821	15.2076	0.659367	0.555168	6	0.224591
ARID1B	5.50175e-47	2.90897e-46	0.661508	0.489816	0.773148	14.3478	0.659346	0.576237	6	0.18034
SRSF4	1.85399e-45	9.41107e-45	0.704484	0.492257	0.816358	14.1017	0.659303	0.589161	6	0.265669
CITED2	2.89362e-50	1.66825e-49	0.648102	0.524839	0.708333	14.8623	0.659231	0.585873	1	-0.111
LMO2	4.84437e-65	3.86233e-64	0.393489	0.727508	0.557099	16.9903	0.659223	0.591011	6	0.478354
PARP10	3.36899e-55	2.17548e-54	0.505405	0.572473	0.640432	15.6049	0.65922	0.517949	1	-0.575231
SLC35A2	1.11254e-59	7.93678e-59	0.394717	0.629032	0.594136	16.2502	0.659106	0.561938	6	0.244516
CORO7	1.09859e-76	1.1199e-75	0.341174	0.744908	0.503086	18.4966	0.659092	0.590358	6	0.144421
BBS2	9.1695e-68	7.71874e-67	0.359575	0.672189	0.544753	17.3542	0.659083	0.55078	6	0.0209348
ZER1	4.52677e-77	4.65871e-76	0.310053	0.803709	0.490741	18.5444	0.658874	0.561602	6	0.381221
PBX1	2.73393e-59	1.93074e-58	0.435973	0.65377	0.598765	16.195	0.658805	0.558316	6	0.103049
OTUB1	3.14052e-45	1.58222e-44	0.72416	0.536921	0.796296	14.0644	0.658801	0.594253	6	0.279599
PAK4	1.8675e-70	1.66958e-69	0.331193	0.806644	0.510802	17.7065	0.658746	0.564584	6	0.379609
MYLK	4.81904e-117	1.06236e-115	0.282582	1.01999	0.410494	22.9685	0.658726	0.598186	6	0.371413
NPEPL1	2.06795e-73	1.96992e-72	0.324652	0.735277	0.507716	18.0856	0.658698	0.582573	6	0.393686
UCP2	3.70882e-41	1.67364e-40	1.50943	0.549169	0.930556	13.3848	0.658674	0.461497	6	-0.0839174
FIP1L1	3.38143e-62	2.55459e-61	0.389637	0.654982	0.569444	16.6018	0.658656	0.608414	6	0.388102
TRIM69	7.28884e-65	5.78839e-64	0.410922	0.795925	0.541667	16.9663	0.658623	0.623565	4	0.235036
TRIM13	1.13384e-59	8.08518e-59	0.409804	0.669086	0.58642	16.2491	0.658609	0.590896	6	0.235087
TPGS2	1.01226e-49	5.73557e-49	0.58224	0.581644	0.705247	14.7782	0.658602	0.492096	6	-0.0696196
FGGY	1.81458e-46	9.47631e-46	0.745679	0.562226	0.75463	14.2647	0.658598	0.560905	5	0.0987687
DMPK	4.51998e-87	5.65857e-86	0.29568	0.815741	0.462963	19.744	0.658595	0.584031	1	-0.310212
CEP170	1.51101e-99	2.37884e-98	0.256771	0.881436	0.435185	21.1457	0.658587	0.590255	6	0.506834
ATP6V1D	5.31249e-45	2.6574e-44	0.760103	0.513958	0.800926	14.0272	0.658556	0.556348	5	0.0790734
CDK5RAP2	4.66418e-80	5.07524e-79	0.299897	0.837227	0.478395	18.9106	0.65847	0.586852	6	0.566275
PURA	2.37692e-51	1.40345e-50	0.523719	0.572464	0.674383	15.0288	0.658466	0.551667	6	0.21788
RASGEF1B	6.6211e-74	6.37118e-73	0.33105	0.722587	0.507716	18.1483	0.658447	0.619516	6	0.577306
DNAJB2	3.50309e-51	2.06312e-50	0.517405	0.54422	0.685185	15.0031	0.658357	0.595624	1	-0.148548
PTPRA	1.00094e-51	5.94703e-51	0.493436	0.595273	0.658951	15.086	0.658333	0.576708	6	0.337702
CAPN7	8.07412e-67	6.66455e-66	0.360351	0.709219	0.535494	17.2288	0.658247	0.597656	1	-0.125128
AL109811.1	4.5323e-223	1.28312e-220	0.26778	1.59929	0.337963	31.8617	0.658219	0.602099	6	0.78385
RABL6	7.78059e-51	4.53924e-50	0.532492	0.568966	0.674383	14.9501	0.658187	0.54454	6	0.000831856
FNDC11	1.53857e-82	1.77342e-81	0.325767	0.647368	0.496914	19.2096	0.65817	0.566959	5	-0.10681
CKB	4.30516e-40	1.89505e-39	2.23583	0.529741	0.984568	13.2014	0.658112	0.32952	5	-0.251189
FAM8A1	4.80963e-79	5.12297e-78	0.306111	0.820115	0.481481	18.7872	0.658105	0.572588	6	0.436623
JKAMP	1.74923e-50	1.0121e-49	0.524796	0.510281	0.699074	14.896	0.658089	0.5554	5	-0.0756159
SIRT5	6.27323e-82	7.09896e-81	0.280362	0.821674	0.470679	19.1365	0.658084	0.578218	6	0.481918
FAM120B	1.11743e-70	1.00569e-69	0.343488	0.693121	0.516975	17.7354	0.658015	0.569473	6	0.0571526
SSRP1	1.33206e-50	7.72662e-50	0.516533	0.545507	0.692901	14.9142	0.658012	0.468675	6	-0.172996
ADGRV1	3.68281e-83	4.29404e-82	0.300212	0.762953	0.473765	19.2837	0.657993	0.620198	6	0.380396
ANXA7	1.45785e-42	6.81698e-42	0.914351	0.514542	0.862654	13.6232	0.657962	0.552815	5	0.137536
FAM76A	5.96029e-83	6.92948e-82	0.301565	0.755487	0.475309	19.2588	0.657921	0.585399	6	0.160514
C22orf39	2.78575e-48	1.51973e-47	0.570814	0.589945	0.705247	14.5532	0.657895	0.562178	6	0.219302
TRANK1	5.12437e-80	5.56849e-79	0.314465	0.875133	0.476852	18.9056	0.657872	0.622445	4	0.51504
AC004990.1	8.21279e-83	9.51398e-82	0.307311	0.840077	0.469136	19.2421	0.65785	0.591264	6	0.407221
UBN2	3.38524e-67	2.81877e-66	0.372405	0.666771	0.540123	17.279	0.657805	0.582097	6	0.217815
ERLIN1	1.28553e-68	1.10168e-67	0.328917	0.763259	0.515432	17.4667	0.65765	0.552845	6	0.279549
SCAMP1	9.27676e-66	7.51125e-65	0.346215	0.744811	0.530864	17.087	0.657518	0.582132	6	0.411368
ABCD3	5.72495e-51	3.35087e-50	0.505624	0.568885	0.67284	14.9705	0.6575	0.545162	6	0.18227
UPF2	6.58242e-54	4.10593e-53	0.457944	0.4656	0.645062	15.4141	0.657496	0.536257	1	-0.665094
DDI2	1.00472e-59	7.1803e-59	0.410744	0.696095	0.574074	16.2565	0.657479	0.591347	6	0.507396
FSTL1	8.25762e-56	5.39924e-55	0.48728	0.638457	0.621914	15.6944	0.657455	0.60729	4	0.292417
CDC42	4.63572e-40	2.03666e-39	1.38918	0.480152	0.947531	13.1958	0.657406	0.593183	5	0.326768
CEBPZOS	1.7534e-59	1.24482e-58	0.386405	0.683305	0.574074	16.2223	0.657398	0.550465	6	0.212166
AC009119.1	8.36798e-115	1.78145e-113	0.279195	1.10605	0.402778	22.7433	0.657383	0.610593	6	0.431079
IFI44	2.11822e-47	1.13334e-46	0.758938	0.574514	0.759259	14.4138	0.657369	0.560277	4	0.0622992
TWF1	3.16503e-48	1.72489e-47	0.584582	0.609688	0.700617	14.5445	0.657237	0.574982	6	0.30026
VILL	1.55603e-47	8.35315e-47	0.626355	0.589286	0.728395	14.4351	0.657196	0.570713	3	0.242558
MEF2A	1.52735e-61	1.13685e-60	0.375624	0.661444	0.561728	16.5111	0.657138	0.607023	6	0.500326
TRIM29	3.83661e-45	1.92511e-44	0.836945	0.550018	0.805556	14.0503	0.657124	0.577906	4	0.139061
PPWD1	1.22259e-82	1.41123e-81	0.283863	0.822292	0.462963	19.2215	0.657089	0.620823	6	0.76211
RALGPS2	6.86882e-60	4.92851e-59	0.423995	0.62714	0.584877	16.2798	0.657055	0.5592	4	-0.0295204
NCOA2	9.33502e-68	7.85397e-67	0.336561	0.684802	0.526235	17.3532	0.657001	0.594823	6	0.491439
RSF1	8.54733e-47	4.50011e-46	0.610932	0.563864	0.723765	14.3172	0.656887	0.618194	6	0.443238
TAGLN3	8.72301e-108	1.58696e-106	0.297119	1.02286	0.416667	22.0227	0.65682	0.597476	6	0.341319
IRAK1BP1	2.39055e-103	4.03097e-102	0.253446	0.902175	0.42284	21.5547	0.656789	0.556275	6	0.384319
CHCHD5	8.85298e-43	4.16625e-42	0.866146	0.507848	0.830247	13.6596	0.656753	0.494478	6	-0.0472525
BBS5	1.27109e-99	2.00308e-98	0.25462	0.900779	0.429012	21.1539	0.656734	0.561072	6	0.436233
CCT7	2.79357e-42	1.29577e-41	0.89146	0.499837	0.839506	13.5756	0.656726	0.541608	5	0.078524
POLQ	8.51912e-190	8.75624e-188	0.21046	1.26616	0.345679	29.3615	0.656725	0.629409	6	1.05329
WDFY2	1.47796e-75	1.47131e-74	0.306637	0.781081	0.484568	18.356	0.656632	0.585368	6	0.283278
C19orf66	5.41241e-49	3.01485e-48	0.630234	0.573643	0.708333	14.6649	0.65661	0.583394	4	-0.0849751
GTF2F1	1.6406e-53	1.01163e-52	0.463288	0.600892	0.623457	15.355	0.656558	0.574627	6	-0.0680194
ABHD6	2.82517e-103	4.75389e-102	0.266515	1.012	0.415123	21.547	0.656547	0.558241	6	0.460279
SMIM26	1.23869e-39	5.39654e-39	1.3119	0.467028	0.936728	13.1216	0.656511	0.526722	5	0.158621
MRPL57	7.10588e-40	3.11163e-39	1.31142	0.489129	0.921296	13.1636	0.656504	0.528447	5	0.0991794
IFIT3	1.25369e-46	6.57273e-46	1.24897	0.590501	0.776235	14.2905	0.656471	0.53473	4	-0.0410893
CNIH2	8.76825e-103	1.45869e-101	0.292211	1.02463	0.421296	21.4945	0.656351	0.530371	6	0.273606
CREBL2	1.89316e-69	1.65403e-68	0.321392	0.764234	0.50463	17.5756	0.656344	0.575423	6	0.44975
TCTEX1D2	1.26941e-43	6.10018e-43	1.19349	0.496473	0.905864	13.8003	0.656329	0.318923	5	-0.513837
FBXW11	1.78258e-65	1.4354e-64	0.331915	0.718605	0.526235	17.0488	0.656329	0.607493	6	0.490147
COL28A1	5.46056e-89	7.10622e-88	0.342909	0.86257	0.459877	19.9658	0.656289	0.563956	5	0.00472765
NDUFA3	7.78124e-39	3.32097e-38	1.73404	0.42215	0.969136	12.9816	0.656264	0.474673	5	0.042913
PIN1	7.9282e-44	3.82726e-43	0.742433	0.496541	0.794753	13.8342	0.656241	0.497413	6	-0.0446469
LRP1	1.10993e-79	1.19966e-78	0.31921	0.816758	0.473765	18.8648	0.656156	0.620879	6	0.426854
CDKL1	7.01405e-157	3.26184e-155	0.222484	1.1844	0.362654	26.6591	0.656133	0.61427	6	0.734752
POLD3	3.50473e-74	3.40083e-73	0.311889	0.773944	0.492284	18.1832	0.656117	0.571842	6	0.370035
KATNAL2	2.34147e-104	4.02389e-103	0.252934	0.89686	0.41821	21.662	0.656068	0.570713	6	0.131637
HIST1H4C	3.50241e-43	1.6677e-42	1.04842	0.492267	0.763889	13.7269	0.656015	0.2676	1	-1.21164
SCARF2	6.9547e-173	4.63752e-171	0.228583	1.15838	0.354938	28.0055	0.655992	0.553983	1	-0.472817
CCDC91	2.48666e-58	1.71925e-57	0.395334	0.659818	0.575617	16.0586	0.655985	0.56022	6	0.286399
MEIS2	3.62267e-69	3.13621e-68	0.341642	0.720847	0.515432	17.5388	0.655967	0.574485	6	0.298986
SPRYD3	4.12357e-67	3.42471e-66	0.3371	0.75817	0.515432	17.2676	0.655947	0.593504	6	0.581471
TNFAIP8	1.86577e-66	1.52988e-65	0.3506	0.756663	0.521605	17.1803	0.655946	0.590403	6	0.565898
ZNF396	1.82466e-131	5.12971e-130	0.223842	1.02644	0.382716	24.369	0.655913	0.612908	6	0.611645
TPST1	9.0067e-86	1.09691e-84	0.269834	0.815401	0.453704	19.5922	0.655896	0.563224	6	0.408381
KMT2C	1.54506e-49	8.70555e-49	0.51653	0.57973	0.67284	14.7497	0.655887	0.600224	3	0.389888
ZNF606	8.44868e-84	9.93705e-83	0.313978	0.762546	0.462963	19.3597	0.655852	0.578177	1	-0.259988
COG4	3.5891e-73	3.40891e-72	0.308088	0.703719	0.492284	18.0552	0.655847	0.573657	1	-0.426355
PRRC2A	8.37776e-49	4.6394e-48	0.524359	0.507089	0.686728	14.6352	0.655843	0.543442	6	-0.189056
MYH10	5.29849e-102	8.73357e-101	0.240823	0.89903	0.41821	21.4108	0.655742	0.541964	6	0.264743
CYB5R2	3.79611e-100	6.05913e-99	0.245413	0.989744	0.415123	21.2108	0.655733	0.609211	6	0.73518
C8orf59	2.24533e-42	1.04417e-41	0.898545	0.539282	0.834877	13.5916	0.655674	0.58642	3	0.273737
RITA1	1.44197e-77	1.49448e-76	0.289615	0.782187	0.476852	18.6058	0.655673	0.552385	6	0.304035
FOXO3	4.23929e-50	2.43017e-49	0.525189	0.592507	0.662037	14.8367	0.65567	0.612305	6	0.357413
G3BP1	3.54715e-46	1.83521e-45	0.599384	0.531434	0.726852	14.2179	0.655658	0.548701	6	0.136942
PRMT7	2.46038e-76	2.48767e-75	0.296872	0.810328	0.473765	18.4531	0.65565	0.580134	6	0.522314
BANF1	1.13218e-39	4.93383e-39	1.24512	0.487346	0.91821	13.1284	0.655611	0.499131	5	0.0617697
APOL1	1.34948e-53	8.3499e-53	0.50322	0.649155	0.618827	15.3676	0.655582	0.569931	4	0.0315261
USP54	2.63424e-66	2.15125e-65	0.341643	0.739761	0.516975	17.1603	0.65558	0.566099	6	0.407973
CACYBP	6.06653e-44	2.93716e-43	0.733251	0.517702	0.776235	13.8534	0.655497	0.588863	6	0.30285
USP33	4.96009e-58	3.40166e-57	0.395659	0.648536	0.574074	16.0158	0.655463	0.583255	6	0.431849
KIAA0100	1.126e-61	8.42773e-61	0.357398	0.712706	0.54784	16.5294	0.655427	0.55983	6	0.27798
HSDL2	1.07752e-74	1.05318e-73	0.296097	0.782771	0.483025	18.2478	0.655423	0.607123	6	0.498553
DOCK4	9.36681e-86	1.13991e-84	0.28757	0.783633	0.455247	19.5902	0.65538	0.587982	6	0.3384
FARP2	8.50907e-76	8.5208e-75	0.299803	0.794674	0.475309	18.386	0.655319	0.571738	6	0.430932
SDHC	2.54103e-41	1.15149e-40	0.913071	0.508619	0.845679	13.4129	0.655296	0.542404	5	0.0979096
FAM208A	1.24884e-57	8.49598e-57	0.387563	0.617608	0.57716	15.9582	0.655287	0.589429	6	0.435298
ZCWPW1	9.80758e-82	1.10597e-80	0.295244	0.74759	0.467593	19.1132	0.655278	0.576665	6	-0.149719
IFT20	2.42762e-45	1.22843e-44	0.619701	0.51271	0.743827	14.0827	0.655269	0.542108	6	0.134375
CEP350	3.12246e-52	1.87104e-51	0.485959	0.593827	0.628086	15.1627	0.655199	0.517935	6	-0.0366658
TBL1XR1	6.10943e-48	3.31054e-47	0.546973	0.568069	0.688272	14.4994	0.655156	0.51104	6	0.0498863
RANBP2	2.2813e-47	1.21979e-46	0.552817	0.484886	0.709877	14.4087	0.655119	0.606407	6	0.233095
KIAA0319L	7.74447e-50	4.39889e-49	0.520175	0.645392	0.645062	14.7962	0.655103	0.562135	6	0.23822
IQGAP1	3.79577e-41	1.71239e-40	0.895445	0.492231	0.87037	13.3831	0.655103	0.612326	4	0.288703
GMPR2	3.51345e-55	2.26786e-54	0.416816	0.645208	0.591049	15.6023	0.655051	0.590251	6	0.321798
OXR1	7.04141e-55	4.51081e-54	0.426853	0.592738	0.598765	15.5578	0.655045	0.605046	6	0.243212
RAB1B	1.29041e-45	6.5834e-45	0.603173	0.535363	0.740741	14.1272	0.655014	0.576825	6	0.271912
CIAO1	3.88653e-61	2.87297e-60	0.355807	0.690371	0.544753	16.4546	0.655001	0.598264	6	0.363461
AKR1C3	2.24714e-48	1.22964e-47	0.605649	0.645221	0.671296	14.5679	0.654998	0.592579	3	0.373551
PAK1	2.49594e-51	1.47265e-50	0.469236	0.617687	0.634259	15.0256	0.654958	0.554575	6	0.226013
RBM10	1.28894e-60	9.44147e-60	0.353714	0.608878	0.555556	16.3818	0.654904	0.592798	6	0.183499
BRF1	2.22833e-81	2.49885e-80	0.27567	0.721532	0.462963	19.0703	0.654863	0.602259	6	-0.0525002
SRRM2	9.3684e-39	3.98886e-38	1.38259	0.465687	0.96142	12.9674	0.654826	0.52758	1	0.122798
TCEA2	4.22235e-60	3.04859e-59	0.383743	0.616869	0.564815	16.3095	0.654799	0.541302	6	0.103884
MINDY2	4.64706e-50	2.66015e-49	0.503747	0.54908	0.665123	14.8306	0.654792	0.597124	6	0.390434
TRMT9B	2.00234e-82	2.29977e-81	0.30017	0.635747	0.473765	19.1959	0.654738	0.558481	5	-0.262301
B4GALNT3	2.62225e-57	1.77274e-56	0.404136	0.62029	0.58179	15.9118	0.654629	0.575379	6	0.407584
IRF1	1.334e-41	6.09649e-41	1.07199	0.493161	0.856481	13.4606	0.654502	0.378448	1	-0.752325
SNAPC4	4.25685e-78	4.44901e-77	0.303491	0.673117	0.476852	18.6711	0.654428	0.560714	1	-0.418525
UVSSA	5.49704e-68	4.65159e-67	0.351737	0.681159	0.512346	17.3835	0.65434	0.600193	6	0.180753
RAB11B	1.36427e-42	6.38863e-42	0.726422	0.510626	0.79784	13.628	0.654301	0.600802	6	0.292819
SUPT7L	1.54894e-60	1.13203e-59	0.350211	0.649903	0.544753	16.3707	0.65425	0.575901	6	0.368765
PLS1	1.62047e-48	8.90044e-48	0.519325	0.568811	0.677469	14.5902	0.654246	0.617616	6	0.475057
PIGX	1.1213e-52	6.79474e-52	0.507968	0.614773	0.614198	15.2298	0.654244	0.575713	6	-0.223543
ALDH16A1	6.52823e-52	3.89306e-51	0.480513	0.605523	0.628086	15.1142	0.654186	0.555676	6	0.220535
FAM228B	1.33207e-93	1.90396e-92	0.258773	0.843019	0.430556	20.4896	0.653999	0.58931	6	0.263306
OSBP	1.22159e-59	8.6994e-59	0.362782	0.721312	0.544753	16.2445	0.653991	0.574915	6	0.420633
FXYD1	1.69308e-57	1.14892e-56	0.590962	0.561997	0.612654	15.9392	0.653982	0.477379	5	-0.448642
CCT3	5.05168e-40	2.217e-39	0.980515	0.477949	0.888889	13.1894	0.653967	0.530904	5	0.0846817
TMEM116	3.0174e-67	2.51507e-66	0.325244	0.769071	0.501543	17.2856	0.653959	0.572742	6	0.448584
TASP1	3.82456e-85	4.6023e-84	0.271019	0.884692	0.441358	19.5185	0.65395	0.588141	6	0.551102
EPS15	1.96268e-55	1.27401e-54	0.385589	0.605358	0.58642	15.6394	0.653914	0.599186	6	0.49328
NSFL1C	2.87724e-44	1.40782e-43	0.614625	0.491385	0.753086	13.9069	0.653898	0.608739	6	0.382598
PRPSAP1	1.2377e-57	8.42377e-57	0.382712	0.662798	0.561728	15.9588	0.653887	0.571038	6	0.352721
CUL5	8.06462e-56	5.27519e-55	0.408965	0.679867	0.572531	15.6959	0.653845	0.566846	6	0.371705
NUDT3	1.19913e-55	7.82464e-55	0.418266	0.642564	0.584877	15.6707	0.653796	0.546853	6	0.223965
CUEDC1	8.54807e-53	5.19353e-52	0.451459	0.563678	0.62037	15.2475	0.653763	0.561734	6	0.189805
SURF2	3.62268e-47	1.92617e-46	0.558825	0.45062	0.700617	14.3767	0.65374	0.477124	1	-0.780056
KDM5B	1.75549e-52	1.0598e-51	0.452591	0.626413	0.609568	15.2005	0.65369	0.586307	6	0.415531
ALDH1A1	1.15702e-37	4.76782e-37	2.60237	0.475873	0.986111	12.7732	0.653685	0.452633	5	-0.00580393
CNGA4	1.41336e-210	2.62154e-208	0.200655	1.33628	0.330247	30.9466	0.653675	0.630161	6	1.12769
ADIPOR1	2.07628e-41	9.438e-41	0.826501	0.530756	0.82716	13.4279	0.653608	0.568895	6	0.176149
MCAT	1.19335e-61	8.91946e-61	0.366337	0.583921	0.552469	16.5259	0.653603	0.529306	6	0.0405696
OMA1	8.22037e-64	6.42072e-63	0.339951	0.654289	0.527778	16.8234	0.653512	0.59604	6	0.132304
RNF19A	7.21707e-53	4.39148e-52	0.45665	0.641684	0.609568	15.2586	0.653495	0.613668	1	0.0196854
GRB2	3.27798e-48	1.78585e-47	0.551174	0.592338	0.660494	14.5421	0.653491	0.582456	4	0.115675
ELOF1	1.75738e-46	9.18653e-46	0.535003	0.494417	0.70679	14.267	0.653475	0.527843	6	-0.0253965
CDC26	6.45338e-44	3.12352e-43	0.64116	0.566457	0.739198	13.849	0.653384	0.520046	6	0.0482328
TNKS	3.28341e-73	3.1204e-72	0.294043	0.747508	0.478395	18.0601	0.65337	0.589579	6	0.444234
RNF138	9.13862e-64	7.12759e-63	0.333702	0.717614	0.518519	16.8171	0.653187	0.592053	6	0.516863
MTREX	6.04726e-60	4.34482e-59	0.344968	0.630611	0.546296	16.2876	0.653153	0.588022	6	0.440436
LNPEP	3.85533e-59	2.71556e-58	0.362745	0.668622	0.544753	16.1739	0.65313	0.612792	3	0.539921
PRKDC	5.06627e-51	2.97073e-50	0.476121	0.612798	0.617284	14.9786	0.653046	0.590506	6	0.429094
[truncated: 2,100 more rows]

## Sheet: Cl03
geneID	pval	fdr	meanExp	logR	expT	rsZ	auc	subMinAuc	subMinIdx	maxLogR
PRSS23	0	0	3.21075	1.98844	0.971304	47.7398	0.935863	0.800215	6	0.521794
CYP2F1	0	0	2.26569	2.74541	0.92087	52.3718	0.9206	0.699894	6	0.485125
AQP5	0	0	2.88386	2.48178	0.945217	49.02	0.91866	0.783524	6	0.815521
FAM3D	0	0	1.77234	2.29219	0.902609	47.025	0.894197	0.701892	6	0.543226
SERPINB3	0	0	3.94232	2.74501	0.872174	47.3577	0.89057	0.76076	6	0.996242
WFDC2	0	0	6.18775	0.776912	1	40.2443	0.887792	0.670679	6	0.161781
CTSC	0	0	2.00505	1.97965	0.929565	43.8241	0.886265	0.73402	6	0.613173
CXCL17	0	0	3.61608	1.16278	0.983478	39.9465	0.88182	0.718099	6	0.378725
S100P	0	0	3.54465	1.57731	0.95913	40.5723	0.878436	0.717424	6	0.420182
SLPI	0	0	7.28637	0.609363	1	39.2517	0.878319	0.644588	6	0.142201
MDK	0	0	2.57917	1.59398	0.949565	40.682	0.877186	0.683186	6	0.376655
LCN2	0	0	4.4679	1.46217	0.985217	39.8035	0.876899	0.579815	6	0.140493
KRT19	0	0	4.77781	0.779622	0.995652	38.7675	0.873538	0.720036	4	0.335565
KLK11	0	0	1.42385	2.22474	0.873913	46.1182	0.872096	0.659465	6	0.494562
VMO1	0	0	2.08311	2.04255	0.910435	42.5153	0.863058	0.660527	6	0.540918
AGR2	1.66912e-311	6.99646e-309	4.31868	1.06973	0.987826	37.7105	0.861738	0.636247	6	0.266678
CREB3L1	0	0	0.937633	2.3635	0.785217	46.6637	0.850826	0.682629	6	0.776174
TSPAN8	0	0	1.5362	2.48192	0.806087	44.9594	0.849099	0.565465	6	0.299812
EPAS1	0	0	1.22994	2.32792	0.796522	43.2752	0.841617	0.669117	6	0.811894
RPLP0	1.90825e-267	5.83249e-265	3.99033	0.617695	0.988696	34.9191	0.836441	0.674113	4	0.240927
LY6E	1.41899e-272	4.62623e-270	2.90984	1.12549	0.963478	35.2554	0.834959	0.666035	4	0.446562
CXCL6	0	0	1.38499	2.56311	0.754783	44.3532	0.831674	0.604594	6	0.558422
C3	0	0	1.46232	2.02208	0.823478	40.559	0.830872	0.543239	6	0.158171
RPS3	1.64014e-255	4.45601e-253	3.63206	0.615848	0.984348	34.1237	0.828658	0.654798	6	0.131563
CXCL1	0	0	1.77661	2.05427	0.810435	39.9257	0.82342	0.594641	6	0.395336
BPIFB1	8.13103e-260	2.25076e-257	4.9903	1.54475	0.918261	34.4127	0.822778	0.475804	6	-0.106524
GSN	6.53586e-249	1.65323e-246	2.88907	0.983155	0.96087	33.6758	0.822193	0.69666	6	0.361445
RPS12	3.50589e-238	8.03671e-236	4.64617	0.513106	0.983478	32.9347	0.817404	0.608189	4	0.132055
MGST1	3.61189e-255	9.63454e-253	2.09525	1.2503	0.929565	34.1006	0.816629	0.674533	4	0.402428
TCEA3	0	0	0.747292	1.94792	0.74087	41.1298	0.812746	0.625341	6	0.540065
RPL10	1.98703e-228	3.93941e-226	4.43053	0.407082	0.993913	32.2462	0.810786	0.633941	6	0.0961777
CP	9.08768e-268	2.83671e-265	1.42523	1.48656	0.882609	34.9403	0.810766	0.632419	6	0.400038
XBP1	5.35349e-227	1.02001e-224	2.37106	1.10253	0.946087	32.144	0.805072	0.631067	6	0.33953
PIGR	3.80037e-224	6.63753e-222	3.07799	1.03629	0.94087	31.9393	0.803642	0.528942	6	0.00391647
S100A14	3.33876e-271	1.06485e-268	1.80964	1.52228	0.872174	35.1658	0.8035	0.534718	4	0.128926
ADH1C	2.04396e-312	8.8197e-310	1.1985	2.04749	0.752174	37.7661	0.803244	0.693098	6	1.0439
ASS1	2.03091e-281	6.92917e-279	1.48886	1.6633	0.822609	35.8279	0.802127	0.621495	4	0.445891
SERPINB11	0	0	1.10834	2.32673	0.701739	41.3458	0.801753	0.60121	6	0.59845
GAPDH	1.43876e-214	2.29435e-212	3.65899	0.730767	0.967826	31.2419	0.80071	0.619465	4	0.246211
NPDC1	0	0	0.684698	1.88835	0.709565	39.7263	0.797609	0.599177	6	0.46669
CRACR2B	2.81433e-262	8.25781e-260	0.982377	1.45519	0.826087	34.5769	0.79739	0.604661	6	0.307358
CEACAM6	1.97927e-236	4.33401e-234	2.22081	1.37186	0.897391	32.8121	0.796232	0.539098	4	0.164727
VSIG2	2.8872e-286	1.00853e-283	0.956635	1.67813	0.768696	36.1378	0.79383	0.625799	6	0.50332
TMED3	1.17267e-264	3.51108e-262	0.927129	1.55673	0.787826	34.7349	0.793243	0.594331	6	0.325503
ADAM28	0	0	0.679275	1.92342	0.691304	39.4252	0.791734	0.666537	6	0.879752
AKR1C1	3.48936e-274	1.16346e-271	1.11563	1.63495	0.78087	35.3602	0.7911	0.651444	6	0.684163
RPS18	1.80107e-197	2.46949e-195	3.99029	0.467712	0.986957	29.9567	0.788694	0.586804	6	0.058896
SCGB3A1	4.06697e-200	5.84966e-198	5.91781	1.10803	0.94087	30.1592	0.787914	0.469013	6	-0.10867
ALPL	0	0	0.759194	2.00293	0.676522	39.5638	0.786931	0.661272	6	0.908912
CDC42EP5	0	0	0.715878	1.87239	0.693913	38.6224	0.786254	0.505326	6	0.0727142
CST3	1.22027e-193	1.55674e-191	3.06959	0.543233	0.98087	29.6611	0.785515	0.639998	6	0.117743
MSMB	1.7606e-217	2.96893e-215	3.69073	1.66694	0.836522	31.4556	0.78493	0.493645	6	-0.0413665
RPL8	1.70464e-190	2.10158e-188	3.94336	0.400829	0.988696	29.4162	0.783487	0.621654	4	0.106747
HES4	1.57251e-229	3.20421e-227	1.31329	1.30307	0.858261	32.3247	0.782618	0.636438	4	0.458852
RDH10	1.65413e-229	3.32436e-227	1.34698	1.52974	0.807826	32.3232	0.781052	0.635028	6	0.575023
ID1	1.46727e-295	5.51956e-293	1.12218	2.04169	0.692174	36.7248	0.780982	0.650609	6	0.910103
RPL3	1.20701e-186	1.41665e-184	3.49914	0.547233	0.982609	29.1136	0.780373	0.533032	6	0.030356
RHOV	0	0	0.678999	2.06123	0.645217	39.885	0.779513	0.625793	6	0.766793
CHP2	0	0	0.554992	2.15151	0.615652	41.9545	0.778472	0.58964	6	0.567601
SLC25A6	5.27982e-195	6.97841e-193	1.64241	1.07134	0.894783	29.7667	0.777319	0.634429	6	0.268079
P4HB	4.18295e-196	5.57891e-194	1.49953	1.08919	0.897391	29.8516	0.776787	0.677464	6	0.430013
RPL18	7.00761e-181	7.78854e-179	3.54102	0.415021	0.97913	28.6547	0.776116	0.620535	4	0.108239
CD55	9.64336e-195	1.26319e-192	2.09403	1.15227	0.898261	29.7464	0.775887	0.568037	4	0.262227
LDHA	8.79577e-226	1.61303e-223	1.06881	1.3573	0.801739	32.0569	0.774708	0.63851	4	0.469941
ATP12A	0	0	0.766878	2.15725	0.633913	39.2459	0.774218	0.596021	6	0.608808
FOS	1.26698e-200	1.87757e-198	2.29793	1.27587	0.854783	30.1978	0.774103	0.566737	6	0.124396
SLC9A3R1	5.38039e-193	6.74665e-191	1.4643	1.14254	0.869565	29.6111	0.773926	0.630461	6	0.319176
S100A16	1.15124e-225	2.08516e-223	1.45735	1.37608	0.816522	32.0485	0.771587	0.484183	4	-0.0816312
GABRP	1.88833e-242	4.54159e-240	1.06086	1.52499	0.749565	33.2315	0.771096	0.627117	4	0.428036
AQP3	1.61311e-176	1.70258e-174	2.8532	0.915589	0.958261	28.3024	0.770532	0.668749	4	0.580883
MUC5B	2.71745e-307	1.10744e-304	1.56126	2.30834	0.647826	37.4527	0.770111	0.468335	6	-0.0624517
STEAP4	3.83313e-242	9.0703e-240	0.951275	1.48304	0.754783	33.2102	0.769836	0.617077	4	0.40981
EEF1D	4.11159e-175	4.24797e-173	2.19736	0.73637	0.953913	28.1879	0.769702	0.606876	4	0.214913
A4GALT	1.98483e-261	5.59989e-259	0.812564	1.60545	0.708696	34.5204	0.769618	0.639328	4	0.557173
SLC4A4	0	0	0.564332	2.08867	0.602609	40.3829	0.768882	0.595075	6	0.627382
MSLN	4.47164e-251	1.17149e-248	1.10064	1.70235	0.715652	33.8234	0.768084	0.556184	6	0.309334
RPL12	1.78003e-169	1.67403e-167	3.74879	0.43	0.977391	27.7243	0.767158	0.589096	4	0.134985
KIAA1324	1.13583e-261	3.26739e-259	0.667073	1.61027	0.693043	34.5365	0.76698	0.541446	6	0.250391
MT1X	2.29827e-220	3.96681e-218	1.28157	1.56103	0.765217	31.6658	0.766877	0.636053	6	0.726629
MUC5AC	2.81044e-230	5.80731e-228	2.74718	1.87837	0.726957	32.3779	0.766504	0.464257	6	-0.115896
SCNN1B	1.50239e-317	6.67926e-315	0.567018	1.82227	0.624348	38.0776	0.766143	0.583267	6	0.503202
CSTA	2.36039e-249	6.07532e-247	1.14342	1.74029	0.704348	33.706	0.765423	0.669172	4	0.794532
FABP5	8.14357e-233	1.73151e-230	1.0819	1.49945	0.736522	32.5577	0.763641	0.674564	4	0.714014
SLC31A1	1.52056e-227	2.93529e-225	0.717125	1.47174	0.726957	32.1831	0.763578	0.549597	6	0.242983
F3	1.07154e-191	1.33225e-189	1.63257	1.13381	0.867826	29.51	0.76084	0.447226	4	-0.221834
OAT	5.09928e-201	7.63383e-199	0.917643	1.28358	0.781739	30.2279	0.76082	0.530879	6	0.0939964
TIMP1	6.35743e-175	6.4324e-173	1.64229	1.05791	0.904348	28.1725	0.759963	0.604206	4	0.346551
RPL7A	4.2601e-159	3.59195e-157	3.51678	0.417437	0.98	26.8496	0.75869	0.616249	6	0.0760418
TGM2	1.93535e-225	3.46263e-223	0.906887	1.56643	0.715652	32.0323	0.758589	0.528021	6	0.189941
SYNGR2	1.31776e-179	1.43206e-177	1.1544	1.1018	0.843478	28.5522	0.758369	0.654113	4	0.565272
GRN	1.49378e-194	1.9394e-192	0.959318	1.16161	0.806087	29.7317	0.758101	0.675508	4	0.641042
SPDEF	0	0	0.565667	2.04078	0.584348	38.9946	0.757699	0.599472	6	0.636861
CD151	4.34839e-182	4.90732e-180	1.18163	1.11253	0.848696	28.7514	0.7575	0.603723	4	0.352139
KDELR2	5.36328e-172	5.24564e-170	1.19702	1.05858	0.852174	27.9326	0.755675	0.61925	6	0.294994
RPS4X	3.29085e-155	2.69721e-153	3.73212	0.438941	0.977391	26.5146	0.755433	0.530811	6	0.00931824
TMEM205	1.91272e-183	2.17531e-181	1.00779	1.1427	0.82087	28.8597	0.755397	0.587952	6	0.285652
ADI1	1.68312e-196	2.2864e-194	0.764915	1.23764	0.758261	29.8821	0.753818	0.603173	6	0.371039
FOXN3	7.57929e-238	1.7107e-235	0.579523	1.48349	0.669565	32.9113	0.753555	0.573179	6	0.390284
ST6GAL1	1.56606e-205	2.36863e-203	0.783757	1.38482	0.732174	30.5693	0.753168	0.562547	6	0.315568
SCGB1A1	2.69901e-155	2.22456e-153	6.66038	0.928073	0.936522	26.522	0.752833	0.464139	6	-0.129604
TPT1	2.36147e-151	1.85268e-149	4.36625	0.338731	0.993913	26.1781	0.752304	0.526976	4	0.0287206
GALE	2.34525e-230	4.91531e-228	0.612851	1.49864	0.663478	32.3835	0.750448	0.617031	6	0.61278
RHOC	1.16119e-184	1.35205e-182	0.87619	1.146	0.789565	28.9565	0.749422	0.592194	4	0.255305
ADIRF	3.26023e-214	5.14309e-212	0.952264	1.28351	0.72087	31.2157	0.749413	0.568526	4	0.0178662
RPL14	1.1119e-147	8.4522e-146	3.09485	0.4469	0.973043	25.8535	0.749001	0.590823	4	0.125429
UGT2A1	2.98229e-300	1.1514e-297	0.619432	2.02897	0.575652	37.0176	0.748852	0.579389	6	0.572619
RPL37	1.37599e-146	1.04057e-144	3.63829	0.40446	0.984348	25.7561	0.748194	0.570289	4	0.134307
RPS24	1.12593e-145	8.30076e-144	3.84902	0.341359	0.987826	25.6745	0.747434	0.568117	4	0.124876
NR4A1	7.30013e-228	1.428e-225	0.924964	1.66515	0.655652	32.2059	0.746811	0.51711	6	0.186955
RACK1	1.95756e-145	1.41475e-143	2.73487	0.529271	0.961739	25.653	0.746761	0.581811	6	0.0510457
RPL30	7.44169e-145	5.32571e-143	3.71303	0.385318	0.98	25.601	0.746693	0.599704	4	0.123671
RPL18A	1.26473e-144	8.96368e-143	3.66262	0.367305	0.978261	25.5803	0.74652	0.586339	6	0.0415823
AC025154.2	7.91424e-238	1.75924e-235	0.592089	1.5607	0.633913	32.91	0.746481	0.61425	6	0.624291
SLC15A2	4.11633e-226	7.64438e-224	0.57278	1.46774	0.654783	32.0806	0.745965	0.613161	6	0.618129
KRT7	2.57884e-154	2.1019e-152	2.715	0.973624	0.941739	26.4369	0.745923	0.346339	4	-0.276356
LYPD2	4.27869e-225	7.56298e-223	2.08821	2.05154	0.64	32.0076	0.745405	0.522442	6	0.274305
CLDN10	4.8676e-287	1.74177e-284	0.593663	1.96418	0.573043	36.187	0.745092	0.523053	6	0.29882
LGALS3BP	6.85982e-149	5.26913e-147	1.68189	0.852257	0.915652	25.9608	0.745082	0.660079	6	0.323545
SMIM31	1.23094e-215	1.98452e-213	0.572176	1.35538	0.672174	31.3204	0.744729	0.573397	6	0.353342
ZG16B	5.82921e-239	1.35747e-236	0.663593	1.6677	0.61913	32.9891	0.74345	0.540336	6	0.310736
FOSB	2.40078e-199	3.35446e-197	1.33449	1.57389	0.690435	30.1003	0.74339	0.556656	6	0.321965
TSPAN13	9.06281e-154	7.30552e-152	1.32512	1.05669	0.854783	26.3894	0.743097	0.57682	6	0.250571
PAM	2.7776e-218	4.7384e-216	0.606345	1.41619	0.666087	31.5142	0.743068	0.517316	6	0.125961
SSR2	1.34593e-166	1.19673e-164	0.953475	1.11424	0.804348	27.4845	0.742912	0.552186	6	0.194555
HS3ST1	6.66205e-164	5.78337e-162	1.10721	1.17857	0.792174	27.2581	0.741814	0.614282	6	0.440767
DCXR	1.9264e-169	1.80014e-167	0.845625	1.10484	0.771304	27.7214	0.741095	0.633701	1	0.322815
KDELR1	9.09349e-165	7.94111e-163	0.891038	1.08898	0.786087	27.331	0.740845	0.660435	6	0.555942
POLD4	3.82049e-193	4.83193e-191	0.758143	1.2796	0.70087	29.6226	0.739744	0.572706	4	0.190186
ECE1	5.99813e-189	7.27261e-187	0.667085	1.24137	0.709565	29.295	0.739681	0.572742	6	0.359575
RPSA	2.72527e-136	1.78493e-134	2.97291	0.51163	0.965217	24.82	0.738822	0.541719	6	0.0276523
STXBP6	3.89686e-304	1.54516e-301	0.402175	1.81082	0.538261	37.2582	0.738071	0.568382	6	0.456158
C19orf33	8.5523e-137	5.70322e-135	2.1569	0.782848	0.933913	24.8666	0.736409	0.502932	4	0.0951405
TSTA3	1.24177e-173	1.23095e-171	0.699774	1.19586	0.717391	28.0669	0.736104	0.59695	6	0.393514
NUDT8	2.7814e-243	6.91626e-241	0.485813	1.52749	0.590435	33.289	0.735933	0.580451	6	0.484435
LY6D	2.1119e-288	7.74592e-286	1.07917	2.53819	0.536522	36.2736	0.73562	0.634608	6	1.31157
MYDGF	5.68005e-152	4.52891e-150	1.04146	1.00735	0.818261	26.2324	0.734939	0.599229	6	0.330175
EIF3H	7.87725e-154	6.38492e-152	0.883383	1.01862	0.793043	26.3947	0.7342	0.638719	6	0.46361
ST6GALNAC1	2.00829e-151	1.58407e-149	0.997106	1.02838	0.812174	26.1843	0.734175	0.558662	6	0.157323
NENF	2.75757e-146	2.0641e-144	1.04261	0.960535	0.838261	25.7292	0.733347	0.531151	6	0.0556034
STARD10	1.31469e-145	9.59589e-144	1.12389	0.980492	0.846957	25.6685	0.73334	0.543109	6	0.141359
RPS2	7.75564e-129	4.55132e-127	3.53364	0.402668	0.982609	24.1198	0.732413	0.528811	6	0.023549
BAG1	1.54824e-136	1.01858e-134	1.51805	0.907008	0.864348	24.8428	0.731888	0.629295	4	0.458465
RPS23	5.88013e-127	3.36982e-125	3.47429	0.382157	0.982609	23.9399	0.73065	0.553661	4	0.0452883
SLC9A3R2	2.81396e-139	1.91128e-137	1.25601	0.933965	0.856522	25.0951	0.730506	0.619799	6	0.337328
SDC1	1.11074e-186	1.31417e-184	0.649483	1.18524	0.676522	29.1165	0.730407	0.555758	4	0.0103756
TNFSF10	1.3366e-136	8.87296e-135	1.49844	0.935685	0.882609	24.8487	0.729896	0.611211	2	0.339132
RPL35	1.71754e-123	9.47297e-122	3.03845	0.421681	0.974783	23.6049	0.727356	0.589717	4	0.070012
UPK1B	2.27059e-206	3.46998e-204	1.12979	1.69609	0.606087	30.6323	0.727216	0.595702	4	0.45746
PPIB	2.65274e-126	1.49686e-124	1.83673	0.725107	0.907826	23.877	0.726983	0.586311	4	0.268264
FAM129A	2.92425e-200	4.24769e-198	0.51292	1.3206	0.617391	30.1701	0.726595	0.56921	6	0.433818
DEFB1	3.3442e-216	5.45142e-214	0.590725	1.47811	0.593043	31.3619	0.726586	0.587848	6	0.650451
ERN2	4.09463e-179	4.38484e-177	0.575437	1.24046	0.656522	28.5125	0.726261	0.597518	6	0.528938
CHPT1	3.68214e-226	6.92572e-224	0.459621	1.5501	0.564348	32.084	0.725653	0.592229	6	0.583235
RPL29	4.61079e-121	2.45981e-119	3.46766	0.354831	0.973913	23.3672	0.725153	0.561883	6	0.0198587
SERINC2	5.61319e-146	4.15915e-144	0.859293	0.962715	0.777391	25.7016	0.724037	0.541135	4	0.0226162
BACE2	3.61877e-137	2.42425e-135	0.95434	0.978938	0.795652	24.9011	0.722298	0.553638	6	0.171059
SPINT2	3.86057e-118	1.93967e-116	2.40469	0.515606	0.950435	23.0779	0.721673	0.610591	4	0.10911
SLC6A14	1.54543e-168	1.435e-166	0.875315	1.2161	0.670435	27.6463	0.721063	0.52234	4	-0.0958273
TSPO	1.18112e-121	6.37065e-120	1.59668	0.778155	0.890435	23.4253	0.720931	0.642189	4	0.384383
KRT18	7.42998e-117	3.68261e-115	3.03563	0.540209	0.95913	22.9496	0.720754	0.567463	1	0.252757
EEF1B2	7.99105e-119	4.12805e-117	1.91961	0.670609	0.914783	23.1459	0.720734	0.612444	6	0.152133
MPST	1.78476e-188	2.14625e-186	0.468358	1.28612	0.605217	29.2578	0.720628	0.581646	6	0.466655
TMPRSS4	5.71562e-142	3.9368e-140	0.928967	1.06811	0.74087	25.3405	0.720134	0.626278	4	0.475471
CALR	2.72801e-119	1.41924e-117	1.70447	0.748337	0.898261	23.1922	0.719703	0.663571	4	0.358449
PDIA3	6.17003e-120	3.24446e-118	1.48544	0.801634	0.892174	23.2561	0.719058	0.629245	6	0.310288
HNMT	3.9821e-199	5.51145e-197	0.458437	1.32714	0.585217	30.0835	0.718933	0.580702	6	0.514206
IDH1	4.22518e-175	4.3348e-173	0.549611	1.29633	0.615652	28.187	0.717552	0.617464	6	0.703855
JUN	3.28619e-119	1.70359e-117	2.18719	0.865782	0.875652	23.1842	0.716703	0.402107	1	-0.25996
RAB25	5.31784e-125	2.97779e-123	1.0769	0.929612	0.8	23.7514	0.716512	0.651632	4	0.558912
TXN	1.334e-111	6.23284e-110	3.69915	0.466127	0.971304	22.4173	0.715949	0.586822	4	0.195056
PABPC1	5.44634e-113	2.59426e-111	1.98895	0.646356	0.934783	22.5593	0.715344	0.550691	4	0.193661
OSTC	7.2485e-129	4.27079e-127	0.85787	0.935211	0.781739	24.1226	0.714813	0.592645	6	0.340858
SLC12A2	1.06665e-176	1.13397e-174	0.48653	1.23833	0.601739	28.317	0.713427	0.505665	6	0.142456
ZDHHC12	2.64327e-163	2.28114e-161	0.485374	1.12546	0.629565	27.2076	0.71309	0.585711	6	0.428284
RPL6	9.49602e-109	4.2735e-107	2.94914	0.427971	0.973913	22.123	0.713007	0.5774	6	0.0565764
PTMS	4.69614e-130	2.83527e-128	0.918055	0.947808	0.777391	24.2355	0.712946	0.599218	6	0.384741
NACA	7.95512e-108	3.4943e-106	2.68096	0.43671	0.951304	22.0269	0.711951	0.596385	6	0.0658986
NTS	2.45152e-179	2.64458e-177	1.1834	1.71155	0.575652	28.5305	0.711907	0.597607	4	0.540325
CD82	1.02516e-130	6.24074e-129	0.743211	0.931285	0.753043	24.2982	0.711612	0.600904	6	0.389647
REEP3	2.1309e-131	1.31909e-129	0.817444	0.973195	0.742609	24.3626	0.71122	0.563182	6	0.159813
OST4	2.92746e-108	1.29755e-106	1.93849	0.602661	0.932174	22.0721	0.710983	0.582899	6	0.0971305
LGALS9	8.30906e-145	5.91758e-143	0.706312	1.07277	0.677391	25.5967	0.710548	0.582301	4	0.204618
ALDH2	8.12589e-121	4.30379e-119	0.951833	0.898697	0.80087	23.343	0.710521	0.591233	6	0.298287
MUC1	5.30822e-109	2.39621e-107	1.99704	0.719804	0.941739	22.1492	0.710438	0.494909	6	-0.0598447
C9orf16	1.29433e-112	6.14536e-111	1.28551	0.766099	0.863478	22.5209	0.710385	0.546899	6	0.0535343
TMEM9B	2.218e-133	1.42721e-131	0.620049	0.964882	0.711304	24.549	0.709221	0.594753	6	0.383816
LMO4	1.26362e-117	6.30566e-116	1.11502	0.961053	0.782609	23.0266	0.708724	0.601521	6	0.394424
FGFBP1	1.0389e-171	1.00275e-169	1.25471	1.61585	0.578261	27.9089	0.707892	0.555266	4	0.250998
SMAGP	5.42972e-166	4.79876e-164	0.447989	1.10798	0.593043	27.4337	0.706304	0.607072	4	0.28551
ATP5F1D	2.54192e-106	1.09362e-104	1.36961	0.705786	0.886957	21.8694	0.706242	0.614402	6	0.213892
COMTD1	1.4471e-153	1.16013e-151	0.513951	1.01127	0.625217	26.3717	0.706061	0.574235	1	-0.230595
SLC16A9	6.02061e-213	9.39664e-211	0.367925	1.4583	0.508696	31.1223	0.70592	0.576628	6	0.563037
TRIM7	1.7824e-242	4.35826e-240	0.359763	1.65659	0.475652	33.2332	0.705844	0.596292	6	0.73796
MARCKSL1	4.11229e-159	3.48736e-157	0.633023	1.18294	0.604348	26.8509	0.705147	0.498892	6	0.0334606
RPL5	1.14978e-100	4.63417e-99	2.56703	0.456499	0.947826	21.2669	0.704573	0.599727	6	0.0823592
RAB5IF	5.21012e-115	2.53105e-113	0.985112	0.86194	0.787826	22.764	0.704215	0.524107	4	0.0206163
RPS5	9.10404e-100	3.60987e-98	3.03934	0.369586	0.967826	21.1696	0.703914	0.534672	6	0.0123614
CFB	1.26806e-137	8.53381e-136	0.711899	1.19518	0.641739	24.9431	0.703796	0.599495	2	0.594233
CTSB	2.17075e-103	9.07325e-102	1.58358	0.675372	0.904348	21.5592	0.703748	0.570801	4	0.201702
SPINT1	1.58203e-115	7.71096e-114	0.944271	0.812939	0.797391	22.8162	0.703519	0.512267	4	-0.0512327
RBM3	1.37659e-116	6.77717e-115	0.820775	0.862594	0.76087	22.9228	0.702937	0.568348	6	0.231034
FAM173A	3.18569e-171	3.05472e-169	0.396826	1.18608	0.551304	27.8688	0.700992	0.5614	6	0.354021
PPA1	3.56539e-107	1.55216e-105	1.09156	0.791367	0.82	21.9588	0.7009	0.534377	4	0.0842934
HM13	2.50438e-113	1.20071e-111	0.868028	0.86141	0.758261	22.5936	0.70055	0.595884	4	0.249522
SLC25A5	1.58289e-100	6.34498e-99	1.58472	0.753539	0.866957	21.2519	0.70047	0.632146	6	0.35548
ETHE1	3.42956e-145	2.46642e-143	0.519219	1.11518	0.601739	25.6312	0.700189	0.608527	4	0.349882
CYP2J2	5.13354e-167	4.6205e-165	0.414107	1.24105	0.550435	27.5195	0.699523	0.546124	6	0.349587
EEF2	1.04373e-96	3.88642e-95	1.98697	0.55754	0.938261	20.8349	0.69948	0.568964	4	0.257704
TACSTD2	9.55188e-96	3.52986e-94	3.11573	0.561292	0.956522	20.7287	0.699235	0.449449	4	-0.0547161
AKR1C2	1.50089e-155	1.24404e-153	0.778734	1.41629	0.566957	26.5441	0.69921	0.638006	4	0.697575
RPL23A	3.25921e-95	1.18945e-93	3.16089	0.33996	0.972174	20.6695	0.699128	0.524896	6	-0.00525267
GALNT6	1.69071e-165	1.4853e-163	0.489085	1.34745	0.546957	27.3924	0.699005	0.499395	6	0.140952
BEX3	7.39758e-174	7.38299e-172	0.421314	1.30929	0.531304	28.0853	0.698231	0.540019	6	0.335918
CAPN8	5.45093e-189	6.66421e-187	0.39665	1.3281	0.513043	29.2983	0.698215	0.571177	6	0.566919
CAV2	2.23339e-149	1.72453e-147	0.551898	1.03335	0.602609	26.004	0.697921	0.501208	4	-0.259049
PDLIM2	5.13663e-168	4.70997e-166	0.495657	1.22942	0.549565	27.6029	0.697884	0.55747	4	0.0856233
FUT2	2.82014e-144	1.97963e-142	0.501486	1.10436	0.596522	25.5489	0.697635	0.614784	6	0.581087
SORL1	1.46339e-159	1.24822e-157	0.475593	1.23731	0.56087	26.8893	0.697514	0.516602	6	0.249504
SELENOM	8.67337e-125	4.81996e-123	0.682645	1.04383	0.664348	23.7308	0.697399	0.486673	6	0.00863256
RPL36A	2.74254e-95	1.00339e-93	1.85304	0.628773	0.911304	20.6778	0.697245	0.544697	4	0.173281
ASAH1	1.57833e-99	6.22466e-98	1.16104	0.731862	0.872174	21.1437	0.696774	0.614421	6	0.314598
TCN2	2.61083e-196	3.51408e-194	0.360391	1.4072	0.490435	29.8674	0.696668	0.598567	6	0.670548
EGR1	8.69703e-129	5.08343e-127	1.0422	1.08989	0.654783	24.115	0.696316	0.470572	6	-0.21209
ECHS1	2.32343e-109	1.05533e-107	0.768705	0.867562	0.73913	22.1864	0.696263	0.551172	6	0.164454
PPP1CA	4.26785e-104	1.79924e-102	0.878442	0.773053	0.791304	21.6343	0.695968	0.621115	6	0.380777
ADH7	4.20821e-150	3.26659e-148	0.72668	1.29224	0.569565	26.068	0.695637	0.60602	6	0.689701
LAMTOR1	2.6416e-106	1.13318e-104	0.825434	0.806622	0.767826	21.8676	0.695623	0.56762	6	0.19617
FAM3B	1.86153e-176	1.95075e-174	0.450397	1.43026	0.506087	28.2974	0.694163	0.597658	6	0.701925
GLTP	6.36636e-144	4.44766e-142	0.486288	1.20556	0.565217	25.5171	0.694122	0.606922	6	0.691705
C12orf57	1.16372e-97	4.38894e-96	1.1521	0.728369	0.851304	20.9397	0.69372	0.42216	6	-0.2215
WDR83OS	4.44685e-95	1.61885e-93	1.18235	0.676067	0.869565	20.6545	0.693271	0.635592	1	0.304428
RNASET2	9.20946e-138	6.22636e-136	0.452403	1.0358	0.590435	24.9559	0.692701	0.552021	6	0.299948
PPIC	2.85664e-108	1.26999e-106	0.697462	0.88466	0.713043	22.0733	0.692038	0.584678	6	0.348838
ZFP36L1	2.17343e-91	7.36406e-90	1.73569	0.676783	0.907826	20.2401	0.691942	0.599938	6	0.256033
C1orf122	2.01796e-123	1.10468e-121	0.535081	0.971511	0.633043	23.5981	0.691872	0.495195	6	0.032132
KRT4	8.43925e-172	8.19948e-170	1.48476	2.16842	0.488696	27.9164	0.691684	0.622789	4	1.06034
CHPF	1.28551e-145	9.42985e-144	0.43208	1.14474	0.555652	25.6694	0.691409	0.572433	6	0.465606
CXCL8	1.09054e-121	5.90382e-120	1.22422	0.986444	0.665217	23.4287	0.69139	0.461411	4	-0.37332
SELENOP	1.23529e-109	5.62823e-108	0.674389	0.873039	0.711304	22.2148	0.691042	0.592013	6	0.424866
LIMA1	5.51786e-124	3.05481e-122	0.517166	1.02044	0.62087	23.6528	0.690382	0.602166	6	0.593488
CD44	4.18397e-128	2.4262e-126	0.749493	1.04733	0.62087	24.0499	0.690237	0.519722	4	-0.0688415
B4GALT5	2.05423e-104	8.68518e-103	0.820883	0.896384	0.725217	21.668	0.68992	0.594062	6	0.346881
TPD52	1.09399e-151	8.67566e-150	0.368914	1.04779	0.54087	26.2074	0.689845	0.579218	6	0.492758
GALNT7	1.55888e-145	1.1322e-143	0.413099	1.12303	0.549565	25.6619	0.689788	0.524994	6	0.238971
ATP1B3	2.65786e-129	1.57868e-127	0.515644	1.04611	0.592174	24.164	0.689093	0.603923	6	0.461623
RIMS1	1.47917e-209	2.2843e-207	0.333693	1.51621	0.446957	30.8707	0.68876	0.554456	6	0.538652
GPRC5A	1.55555e-112	7.33807e-111	1.1833	0.76672	0.72087	22.5128	0.688746	0.319805	4	-0.823088
TMED2	4.66234e-91	1.55811e-89	1.1504	0.713055	0.834783	20.2024	0.688176	0.585971	6	0.206802
EI24	6.13326e-102	2.52756e-100	0.690813	0.802538	0.735652	21.404	0.688126	0.550111	6	0.186786
PDZK1IP1	1.33754e-172	1.31698e-170	0.372806	1.30253	0.488696	27.9822	0.687826	0.545572	6	0.356529
FAM114A1	2.29636e-118	1.16172e-116	0.508329	0.965599	0.622609	23.1003	0.68736	0.551328	6	0.289235
CRYM	2.79344e-184	3.20176e-182	0.40438	1.53528	0.466957	28.9262	0.687178	0.504619	6	0.202156
SLC25A39	9.66079e-101	3.9045e-99	0.719296	0.782544	0.726087	21.2751	0.686854	0.567684	6	0.238441
YBX1	3.28304e-85	9.97215e-84	1.99589	0.543803	0.909565	19.5263	0.686721	0.564091	6	0.0537274
DNAJC4	5.99708e-161	5.14521e-159	0.346941	1.18051	0.5	27.0077	0.68616	0.566144	6	0.471084
IER3	2.91931e-116	1.43242e-114	0.765199	0.921083	0.641739	22.89	0.686148	0.540619	1	-0.208523
DUT	6.45915e-99	2.49374e-97	0.709159	0.752621	0.73913	21.0771	0.685291	0.521802	6	0.0817857
AMN	7.95063e-158	6.66536e-156	0.366985	1.15052	0.505217	26.7406	0.685084	0.606178	6	0.491082
BPIFA1	7.75858e-141	5.29424e-139	1.8119	2.00395	0.516522	25.2375	0.684969	0.482764	6	0.168164
TMED9	5.14513e-99	1.99167e-97	0.736806	0.814536	0.729565	21.0878	0.684894	0.573393	6	0.343232
LINC01133	2.3986e-199	3.35446e-197	0.306916	1.39063	0.446957	30.1003	0.684883	0.585287	6	0.641459
SORD	1.44835e-112	6.85442e-111	0.581448	1.03545	0.621739	22.5159	0.684373	0.537545	6	0.285616
ASPH	2.80476e-99	1.09438e-97	0.749542	0.766669	0.732174	21.1165	0.684358	0.517478	4	-0.0775211
PROM2	2.86063e-217	4.76913e-215	0.295386	1.51056	0.424348	31.4402	0.683628	0.604858	6	0.868518
CLINT1	1.64925e-89	5.43735e-88	1.03308	0.770053	0.784348	20.0255	0.683618	0.580334	2	0.266943
LPCAT4	5.40389e-110	2.47752e-108	0.702011	1.00282	0.630435	22.2519	0.683606	0.582785	4	0.260195
KLF4	5.06431e-101	2.05813e-99	0.994615	0.98312	0.683478	21.3053	0.683449	0.557855	6	0.109609
PDIA6	4.69189e-87	1.48032e-85	1.1138	0.683125	0.843478	19.7421	0.683444	0.590949	6	0.245361
MPZL2	5.31624e-108	2.34218e-106	0.59589	0.824258	0.663478	22.0452	0.683292	0.560404	4	0.0679864
CEACAM5	2.42983e-133	1.54992e-131	1.02135	1.14874	0.566957	24.5453	0.683075	0.460945	4	-0.387275
JUNB	1.09616e-87	3.50364e-86	1.60603	0.730328	0.84	19.8154	0.682793	0.382425	1	-0.477008
FUT6	7.01916e-180	7.68493e-178	0.332322	1.28892	0.46087	28.5743	0.682745	0.617437	4	0.511803
CYB5A	1.7353e-81	5.02142e-80	2.21548	0.540411	0.945217	19.0834	0.682624	0.532008	6	0.0297922
TXNDC17	3.63164e-87	1.15324e-85	1.0316	0.705202	0.806957	19.755	0.681756	0.585906	4	0.25487
FKBP11	1.09858e-119	5.75619e-118	0.578708	1.10222	0.58	23.2313	0.681678	0.507888	6	0.204094
CLCA2	4.56487e-235	9.84871e-233	0.453858	1.99201	0.405217	32.7164	0.681545	0.530231	6	0.379133
EPS8L1	3.7923e-93	1.32469e-91	0.946207	0.683538	0.768696	20.4386	0.681509	0.476841	4	-0.316919
SURF4	3.72886e-106	1.59493e-104	0.54453	0.868856	0.641739	21.8519	0.681402	0.557378	6	0.291478
NME2	8.1664e-98	3.08787e-96	1.3403	1.10517	0.627826	20.9566	0.681086	0.54454	4	0.177769
DAP	7.805e-102	3.20748e-100	0.551827	0.814302	0.670435	21.3927	0.681061	0.526755	6	0.133862
HSPB1	8.92027e-80	2.52157e-78	2.62252	0.533844	0.96087	18.8764	0.680928	0.453157	4	-0.0433459
MAGED1	5.02182e-112	2.36138e-110	0.51483	0.927406	0.613913	22.4608	0.680888	0.516052	6	0.122623
C9orf152	2.54476e-168	2.34806e-166	0.333216	1.30806	0.461739	27.6283	0.679916	0.571613	6	0.5993
MLF2	1.15632e-87	3.6879e-86	0.879323	0.731674	0.777391	19.8127	0.679619	0.54701	6	0.126221
GORASP2	1.63187e-126	9.27952e-125	0.38408	0.974375	0.546087	23.8973	0.679619	0.597955	6	0.490227
ABRACL	9.30691e-106	3.95773e-104	0.54512	0.804116	0.644348	21.8101	0.679461	0.551027	4	0.000988116
TMSB4X	2.19979e-77	5.98759e-76	3.57242	0.396886	0.985217	18.5831	0.679051	0.284506	4	-0.238035
AKR1A1	7.66723e-83	2.27704e-81	1.09867	0.677561	0.830435	19.2457	0.67887	0.614322	6	0.329929
HSD17B10	4.18851e-121	2.24269e-119	0.405073	0.915656	0.567826	23.3713	0.678855	0.563812	6	0.379609
SEC11C	5.56549e-88	1.78668e-86	0.909702	0.737978	0.76087	19.8495	0.678853	0.53886	6	0.152768
UROS	2.05559e-126	1.16439e-124	0.37939	0.985604	0.543478	23.8877	0.678771	0.525299	6	0.211695
CD9	5.19594e-77	1.40645e-75	2.81174	0.427203	0.953043	18.537	0.678287	0.628513	5	0.272349
SLC39A7	3.85581e-120	2.03484e-118	0.415506	0.988065	0.557391	23.2763	0.678128	0.552726	6	0.355876
RAB3D	1.82656e-200	2.67975e-198	0.267575	1.40649	0.41913	30.1857	0.678012	0.551173	6	0.431832
CKAP4	7.41083e-111	3.45156e-109	0.515424	0.889386	0.601739	22.3408	0.677706	0.563622	4	0.105765
CCND1	5.54026e-86	1.70401e-84	1.03203	0.749535	0.775652	19.6169	0.677388	0.540929	4	0.0703788
PPP1R14B	2.73353e-118	1.37813e-116	0.47333	0.90138	0.575652	23.0928	0.677219	0.529677	6	-0.112381
CHL1	1.04895e-104	4.44772e-103	0.557568	0.944299	0.62	21.699	0.676924	0.509105	2	0.105518
B3GNT3	2.35346e-144	1.65998e-142	0.332017	1.09254	0.490435	25.556	0.676885	0.599593	6	0.432679
FAM162A	7.45261e-94	2.63463e-92	0.649196	0.839623	0.673043	20.5179	0.676778	0.602197	6	0.484853
SEC61A1	4.60864e-94	1.6411e-92	0.651631	0.795228	0.693043	20.5412	0.676716	0.509876	6	0.104859
NDRG2	5.98054e-104	2.51405e-102	0.524471	0.778583	0.633043	21.6188	0.676605	0.542989	6	0.264944
SSR4	2.42668e-75	6.36885e-74	2.18434	0.486774	0.934783	18.329	0.675937	0.49879	6	-0.0142059
PHLDA2	2.11537e-96	7.85686e-95	1.0027	0.781063	0.692174	20.8011	0.675808	0.424543	4	-0.451468
TMEM141	6.85429e-89	2.21985e-87	0.684762	0.733264	0.71913	19.9545	0.675697	0.551127	6	0.191414
CENPX	1.91952e-98	7.33365e-97	0.551689	0.82514	0.641739	21.0254	0.674868	0.529505	6	0.198502
PRSS8	2.44332e-127	1.40572e-125	0.404912	0.72804	0.54	23.9765	0.674539	0.476062	4	-0.629789
APH1A	2.20618e-99	8.67745e-98	0.508295	0.773259	0.632174	21.1278	0.674416	0.606499	4	0.150397
SCNN1A	1.77203e-88	5.7263e-87	0.756348	0.79141	0.712174	19.9069	0.674333	0.591177	6	0.409109
TUBB	2.23683e-89	7.35797e-88	0.784709	0.774814	0.695652	20.0104	0.674151	0.560598	6	0.155976
IGFBP3	1.24655e-113	6.03567e-112	0.961937	1.12989	0.561739	22.6244	0.673624	0.492345	4	-0.199612
CYP2B6	6.56201e-200	9.34672e-198	0.323033	1.62574	0.4	30.1433	0.673175	0.628938	6	1.21869
IER2	1.46081e-77	4.00589e-76	1.62457	0.667591	0.856522	18.6051	0.673149	0.401907	1	-0.378851
AVPI1	9.19075e-123	5.01254e-121	0.417002	1.00651	0.524348	23.5338	0.672818	0.562963	6	0.308557
PTPRZ1	5.13737e-176	5.34541e-174	0.287266	1.31176	0.423478	28.2615	0.672104	0.605223	6	0.869858
PDXDC1	3.36699e-91	1.13557e-89	0.575348	0.762768	0.669565	20.2185	0.671968	0.55244	6	0.28317
ABLIM1	8.61571e-87	2.70088e-85	0.745243	0.81705	0.684348	19.7113	0.671273	0.579515	4	0.243608
BST2	1.58988e-78	4.41764e-77	1.46295	0.753467	0.778261	18.7236	0.671231	0.512915	4	0.0488617
SGK1	4.47019e-109	2.02414e-107	0.713715	1.06006	0.558261	22.157	0.671204	0.589591	4	0.370282
GLRX	2.14354e-81	6.19053e-80	1.01465	0.715857	0.751304	19.0723	0.670571	0.515286	4	-0.0818774
IFRD2	1.781e-123	9.78613e-122	0.344184	0.943525	0.506957	23.6033	0.67038	0.576128	6	0.505018
SSR3	1.54229e-81	4.48059e-80	0.758351	0.637318	0.753913	19.0895	0.670277	0.55399	6	0.0242954
ATP1B1	2.72365e-72	6.84224e-71	1.53069	0.582543	0.896522	17.943	0.670112	0.519662	2	0.012123
SLC16A3	7.21549e-90	2.38958e-88	0.608234	0.745604	0.66	20.0667	0.670026	0.579047	4	0.1543
PRDX4	6.10104e-83	1.81559e-81	0.731978	0.755027	0.714783	19.2575	0.66984	0.513958	6	0.0870292
ARMCX3	1.91331e-125	1.07548e-123	0.350082	1.03384	0.495652	23.7943	0.669434	0.550826	6	0.417335
S100A4	8.50825e-74	2.1899e-72	1.44445	0.692227	0.842609	18.1345	0.669409	0.579931	6	0.317326
MESP1	9.41753e-175	9.46333e-173	0.319939	1.3381	0.414783	28.1585	0.669258	0.571206	6	0.654148
RAB37	2.08613e-180	2.30118e-178	0.296739	1.4289	0.405217	28.6166	0.66923	0.550452	6	0.524232
SLC44A2	5.40646e-107	2.33977e-105	0.397783	0.862636	0.553913	21.9399	0.66876	0.572959	6	0.358329
NSA2	2.56143e-79	7.17152e-78	0.756049	0.671939	0.746087	18.8206	0.668662	0.551446	6	0.183247
ZFP36	1.23419e-73	3.16552e-72	1.54523	0.675529	0.82087	18.1141	0.668614	0.551564	1	0.150349
LMAN2	9.90699e-74	2.54545e-72	1.07376	0.640397	0.831304	18.1262	0.668579	0.503758	6	0.0095189
RPS21	6.92966e-69	1.61117e-67	2.98517	0.357879	0.973043	17.5019	0.668577	0.460028	4	-0.0129369
RPS3A	1.93451e-68	4.46245e-67	3.21547	0.331336	0.972174	17.4433	0.668028	0.470851	6	-0.0599842
BHLHE40	2.83846e-96	1.05159e-94	0.585659	0.862227	0.602609	20.787	0.667991	0.571073	6	0.243545
PART1	1.20013e-117	6.00924e-116	0.429706	1.09514	0.509565	23.0288	0.667832	0.512555	6	0.220968
TAX1BP3	6.97314e-107	3.00891e-105	0.409776	0.891524	0.549565	21.9283	0.667774	0.583372	6	0.250593
ALKBH7	5.04327e-78	1.39079e-76	0.767851	0.668681	0.761739	18.662	0.667675	0.48472	6	-0.036196
TM9SF3	3.78731e-76	1.00842e-74	0.807786	0.651763	0.786957	18.4298	0.667475	0.503835	6	0.0296098
RAP1A	5.2584e-90	1.74538e-88	0.525781	0.752466	0.63913	20.0824	0.667359	0.550636	6	0.15746
NUDT22	5.44916e-131	3.34496e-129	0.301062	0.988048	0.470435	24.3241	0.666959	0.568892	6	0.495942
MAL2	7.53959e-72	1.86532e-70	1.30516	0.614809	0.851304	17.8863	0.666858	0.447119	4	-0.153384
AC008397.1	8.23668e-168	7.50561e-166	0.276113	1.2911	0.412174	27.5858	0.666778	0.521004	6	0.227657
GPI	5.3082e-89	1.72293e-87	0.617632	0.881763	0.613043	19.9672	0.666654	0.596744	2	0.530081
PNPLA2	6.15109e-82	1.80125e-80	0.778913	0.693596	0.701739	19.1375	0.666421	0.461561	4	-0.293498
TUBA1C	4.3442e-87	1.37357e-85	0.692811	0.741954	0.651304	19.746	0.666298	0.50095	4	-0.232507
SNHG18	1.9934e-113	9.58858e-112	0.36473	0.987541	0.509565	22.6037	0.666125	0.545902	6	0.384391
GSTK1	2.13649e-71	5.24155e-70	1.08912	0.613381	0.832174	17.8282	0.666053	0.58785	2	0.229309
SEL1L3	2.23391e-95	8.19342e-94	0.456639	0.848293	0.585217	20.6877	0.665548	0.523713	6	0.226383
UQCRH	4.86864e-69	1.13377e-67	1.3964	0.560011	0.866957	17.522	0.66548	0.557187	6	0.0703959
RNASE1	1.70975e-129	1.02383e-127	0.470367	1.06795	0.473043	24.1823	0.665338	0.516864	6	-0.0081828
CTNNBIP1	4.12487e-106	1.75918e-104	0.377765	0.885126	0.536522	21.8473	0.665196	0.514691	6	0.141094
EML4	3.6874e-91	1.23794e-89	0.509887	0.828939	0.603478	20.214	0.665186	0.563763	6	0.416014
TRIP6	2.66118e-94	9.52247e-93	0.482014	0.770259	0.590435	20.5679	0.664714	0.583767	4	0.191271
RPL10A	7.49314e-66	1.65311e-64	2.81124	0.346031	0.953913	17.0994	0.664622	0.492896	6	-0.0502936
DDOST	1.38316e-81	4.02625e-80	0.591037	0.703641	0.668696	19.0952	0.66405	0.560001	6	0.284908
PPCS	1.39399e-80	3.99438e-79	0.58796	0.703234	0.682609	18.9742	0.663976	0.505428	6	0.0555751
CFH	4.8031e-86	1.48038e-84	0.530102	0.724589	0.63913	19.6242	0.663865	0.521516	2	0.078264
SELENBP1	2.50398e-72	6.30119e-71	0.993947	0.639602	0.81913	17.9476	0.663711	0.430241	2	-0.199559
CHD3	5.04912e-99	1.95967e-97	0.431933	0.878719	0.549565	21.0887	0.663605	0.481888	6	0.0160781
YIPF2	2.41707e-93	8.48346e-92	0.420886	0.78247	0.585217	20.4606	0.663417	0.459704	6	-0.122751
LDLR	6.49031e-87	2.03896e-85	0.681965	0.748354	0.637391	19.7257	0.663338	0.52706	4	-0.0605635
CYP2A13	5.2453e-194	6.75034e-192	0.285838	1.5094	0.375652	29.6895	0.663211	0.522051	6	0.255934
RARRES1	2.30149e-103	9.59236e-102	0.865388	1.50869	0.511304	21.5565	0.663198	0.555793	6	0.779923
TMEM167A	1.21132e-79	3.40447e-78	0.575023	0.646854	0.693043	18.8602	0.663108	0.549819	6	0.164927
TP53I3	1.11923e-107	4.90154e-106	0.384082	0.895275	0.515652	22.0114	0.662922	0.592759	6	0.47889
CAPG	1.80456e-86	5.62096e-85	0.625742	0.703075	0.635652	19.6739	0.662857	0.49683	4	-0.241376
SERPINB4	7.48125e-217	1.23323e-214	0.435831	1.97814	0.36	31.4096	0.662857	0.625369	6	1.43611
PLLP	3.28861e-171	3.13293e-169	0.245024	1.26011	0.393043	27.8677	0.662857	0.584747	6	0.693217
RHOBTB3	1.97294e-108	8.85169e-107	0.378929	0.998766	0.506957	22.09	0.662707	0.537356	6	0.342625
MAGT1	6.0103e-110	2.74695e-108	0.345161	0.940381	0.504348	22.2471	0.66255	0.516954	6	0.193441
SRM	5.48094e-102	2.26509e-100	0.425857	0.844993	0.533043	21.4092	0.662518	0.553151	6	0.231925
SYNGR1	1.22808e-166	1.09861e-164	0.242583	1.2687	0.393913	27.4878	0.662193	0.551047	6	0.451831
SULT2B1	7.69747e-125	4.2939e-123	0.349183	0.916378	0.467826	23.7358	0.661762	0.554586	4	-0.119534
BMPR1B	2.26017e-110	1.04603e-108	0.377149	0.995741	0.496522	22.291	0.661709	0.5039	6	0.175535
TCF4	2.54899e-88	8.21897e-87	0.496526	0.789842	0.59913	19.8887	0.661655	0.503541	6	0.110285
SMAP1	2.01198e-94	7.25253e-93	0.440572	0.869254	0.553043	20.5815	0.661635	0.559504	6	0.348946
GCHFR	8.68675e-83	2.57461e-81	0.604433	0.716188	0.646957	19.2392	0.661585	0.507828	6	0.103621
MRPS12	2.17302e-94	7.81383e-93	0.408336	0.810381	0.55913	20.5777	0.661572	0.54137	6	0.279764
RPN2	3.43094e-69	8.00244e-68	0.939602	0.627836	0.809565	17.5419	0.661424	0.506129	6	0.0515053
CMPK1	2.73982e-68	6.28061e-67	0.985841	0.586815	0.826087	17.4234	0.66139	0.557051	2	0.143292
ISOC2	3.58954e-85	1.08806e-83	0.494833	0.725994	0.614783	19.5217	0.661339	0.469911	6	-0.0886661
PTGES	6.47943e-182	7.25647e-180	0.25537	1.32697	0.37913	28.7376	0.661139	0.583021	6	0.76994
DUSP23	1.50777e-80	4.31198e-79	0.55524	0.733689	0.64087	18.9701	0.661022	0.523187	6	0.16254
RNF7	3.95572e-67	8.88734e-66	1.08579	0.588716	0.833043	17.27	0.660967	0.567931	6	0.156161
EBPL	1.42225e-82	4.19837e-81	0.521532	0.761849	0.626087	19.2137	0.660823	0.529767	6	0.174046
ALG3	1.77644e-110	8.24751e-109	0.313006	0.906079	0.486957	22.3018	0.660219	0.545745	6	0.371338
PHYHD1	2.71193e-108	1.20932e-106	0.331775	0.95265	0.492174	22.0756	0.659914	0.550956	6	0.392599
KLK10	2.90182e-113	1.38673e-111	0.471204	0.730803	0.497391	22.5871	0.65978	0.47497	4	-0.701989
TMEM54	5.65446e-86	1.73549e-84	0.468292	0.739992	0.602609	19.6159	0.659661	0.502435	6	0.0558684
TMEM165	3.64586e-70	8.69731e-69	0.831892	0.604103	0.761739	17.6688	0.659322	0.510655	4	-0.100116
MRPS18A	4.65893e-90	1.54991e-88	0.407925	0.725057	0.567826	20.0884	0.659284	0.579498	6	0.054227
C16orf89	2.75152e-99	1.07647e-97	0.68001	1.29861	0.503478	21.1174	0.659282	0.456498	6	-0.0582695
LSM2	2.35897e-97	8.85126e-96	0.360463	0.805736	0.527826	20.906	0.659043	0.51706	6	0.162866
IRS2	2.03159e-91	6.8994e-90	0.508073	0.851466	0.55913	20.2434	0.658781	0.479667	6	0.00205525
ERGIC1	2.18711e-77	5.96415e-76	0.574482	0.707439	0.656522	18.5835	0.658776	0.527717	6	0.173379
AC019117.2	2.16066e-188	2.57716e-186	0.24152	1.4019	0.364348	29.2513	0.658708	0.613318	6	1.00016
CDK2AP2	3.49542e-71	8.5185e-70	0.78485	0.597173	0.733913	17.8006	0.658648	0.403201	6	-0.535451
SEC13	3.1162e-78	8.60974e-77	0.549895	0.700809	0.64087	18.6877	0.658647	0.553332	6	0.279079
DNAJC12	1.38476e-184	1.59967e-182	0.280378	1.47883	0.366087	28.9505	0.65839	0.52019	6	0.316545
AUP1	1.99504e-71	4.90271e-70	0.716836	0.636984	0.701739	17.832	0.657899	0.570538	4	0.164359
JTB	8.85893e-63	1.81775e-61	1.3415	0.539123	0.873913	16.682	0.657751	0.505392	6	-0.0376445
TPBG	1.32295e-100	5.31753e-99	0.347061	0.850974	0.508696	21.2603	0.657657	0.588928	4	0.287116
AK2	2.36724e-71	5.79795e-70	0.668642	0.670706	0.706957	17.8224	0.657485	0.551032	6	0.223055
NCOA4	2.1617e-77	5.90583e-76	0.549338	0.7438	0.633913	18.5841	0.657268	0.568158	6	0.385094
KRT15	2.88174e-100	1.14886e-98	0.617608	0.872041	0.517391	21.2238	0.65726	0.466748	4	-0.543473
ARF4	7.87261e-64	1.67633e-62	1.15359	0.558575	0.838261	16.826	0.65708	0.48819	4	-0.0504534
BZW1	3.55239e-66	7.89654e-65	0.90365	0.582351	0.788696	17.1429	0.656924	0.527212	4	-0.0203516
MRPS15	3.6935e-74	9.59069e-73	0.595429	0.660483	0.661739	18.1803	0.656638	0.540136	6	0.175932
SSR1	3.83619e-73	9.78795e-72	0.595104	0.673488	0.678261	18.0515	0.656577	0.516955	6	0.140539
GALNT12	2.41124e-110	1.11243e-108	0.328709	0.985569	0.465217	22.2881	0.656143	0.548957	6	0.434636
RWDD1	5.76635e-70	1.36669e-68	0.678749	0.636645	0.708696	17.6429	0.655868	0.534632	6	0.156246
ATP5MC1	3.91355e-65	8.49345e-64	0.897392	0.576473	0.776522	17.0028	0.655663	0.533738	6	0.0858914
IMPDH2	4.44985e-74	1.15342e-72	0.605293	0.721949	0.642609	18.1701	0.655285	0.575063	6	0.385948
VTCN1	5.51042e-146	4.10372e-144	0.265086	1.16645	0.395652	25.7023	0.655228	0.571278	6	0.608719
LAPTM4B	3.06356e-133	1.94569e-131	0.252377	1.10349	0.406087	24.5358	0.653801	0.536348	6	0.349378
EIF5A	8.4489e-65	1.8175e-63	0.808712	0.580912	0.755652	16.9576	0.653724	0.546312	6	0.140042
LYZ	2.48793e-73	6.37006e-72	0.908851	0.78153	0.633913	18.0754	0.653175	0.400567	6	-0.291276
QSOX1	1.13843e-66	2.54603e-65	0.711281	0.575194	0.726957	17.2089	0.652591	0.521491	6	-0.0396278
PON2	5.23667e-78	1.44141e-76	0.450551	0.694648	0.592174	18.66	0.652487	0.540106	6	0.255813
CLTB	3.616e-61	7.1593e-60	1.06909	0.588808	0.797391	16.459	0.652232	0.518064	4	0.00477529
GLUD1	8.55396e-68	1.94265e-66	0.745499	0.599724	0.697391	17.3582	0.652193	0.487214	4	-0.2407
LYN	1.1077e-72	2.80191e-71	0.582209	0.69754	0.628696	17.9929	0.651751	0.552556	2	0.279428
COA4	5.44065e-71	1.31499e-69	0.543092	0.635669	0.646957	17.7758	0.651696	0.492711	6	0.00438812
UQCC2	3.26172e-63	6.8361e-62	0.7928	0.549164	0.766957	16.7416	0.65166	0.498153	6	-0.0414276
LAD1	1.29274e-133	8.35499e-132	0.300236	1.13834	0.39913	24.5709	0.651595	0.56934	4	0.254901
CAPN5	6.59409e-93	2.29791e-91	0.361696	0.888128	0.496522	20.4116	0.651444	0.518049	6	0.227441
SLC38A2	3.09789e-75	8.10145e-74	0.619416	0.599461	0.623478	18.3158	0.651275	0.501826	4	-0.369582
LRRC59	4.93375e-70	1.17315e-68	0.583225	0.667271	0.646087	17.6517	0.651129	0.516696	6	0.099616
PTP4A2	1.18918e-61	2.3932e-60	0.842011	0.575705	0.798261	16.5262	0.650947	0.503083	6	0.0497922
ARL1	8.31023e-64	1.76439e-62	0.702561	0.620538	0.731304	16.8228	0.650692	0.495854	6	0.0332348
WNK2	4.00532e-131	2.46899e-129	0.265298	1.13941	0.396522	24.3367	0.650666	0.504048	6	0.193735
ARHGDIB	2.05945e-98	7.84783e-97	0.394488	0.824247	0.475652	21.0221	0.650615	0.575281	6	0.04838
SLC35C1	1.94645e-118	9.8811e-117	0.261961	0.980876	0.42	23.1075	0.650602	0.56077	6	0.474681
ADORA2B	4.71483e-107	2.04649e-105	0.31857	1.02795	0.44087	21.9461	0.650584	0.572137	6	0.592492
SLC25A3	1.17244e-56	2.11053e-55	1.47944	0.491764	0.88	15.8178	0.650341	0.565532	4	0.156774
HYAL2	1.21749e-132	7.66601e-131	0.229927	1.05108	0.393913	24.4796	0.650134	0.54629	6	0.369733
STEAP1	1.42858e-136	9.44086e-135	0.243215	1.05746	0.388696	24.846	0.650057	0.586621	6	0.223082
TM4SF1	5.70657e-70	1.35471e-68	1.26167	0.648176	0.666957	17.6435	0.649945	0.303139	4	-0.861097
PRDX2	1.93854e-59	3.68875e-58	0.986066	0.554258	0.802609	16.2162	0.649848	0.551491	6	0.149378
PKM	1.00015e-55	1.76361e-54	1.6691	0.48421	0.90087	15.6823	0.649647	0.576726	4	0.236323
FDX1	1.8693e-65	4.0932e-64	0.616685	0.624543	0.67913	17.0461	0.649473	0.543782	6	0.195738
RAPGEFL1	2.60566e-134	1.69901e-132	0.264345	1.16625	0.386087	24.6359	0.649099	0.579432	6	0.633094
SEC24D	1.24477e-95	4.58843e-94	0.330143	0.858082	0.473043	20.7159	0.649094	0.541594	6	0.367348
GLUL	1.05118e-54	1.78494e-53	2.2037	0.481529	0.94	15.5321	0.648968	0.568069	2	0.160281
TMUB1	4.77179e-89	1.55571e-87	0.331259	0.744978	0.498261	19.9726	0.64893	0.567044	6	0.381901
AHCY	4.42491e-92	1.51324e-90	0.338645	0.80353	0.484348	20.3184	0.648791	0.546499	6	0.351944
RUSC1	2.23213e-99	8.75603e-98	0.311438	0.918319	0.455652	21.1273	0.648737	0.596018	4	0.420244
GMDS	4.54001e-70	1.08127e-68	0.513068	0.631689	0.623478	17.6564	0.648593	0.515559	6	0.133685
BEX4	1.04342e-92	3.62749e-91	0.344016	0.862438	0.481739	20.3892	0.64851	0.529987	6	0.316714
GPC1	5.29781e-88	1.70448e-86	0.387873	0.791258	0.503478	19.852	0.648185	0.565288	6	0.232543
TSC22D3	2.18553e-75	5.74622e-74	0.519869	0.724474	0.569565	18.3347	0.648093	0.558626	6	0.301486
CHMP1B	2.48207e-64	5.30824e-63	0.670673	0.625379	0.676522	16.8942	0.648046	0.556821	6	0.0648556
TMEM14C	3.58897e-59	6.77654e-58	0.830378	0.558383	0.77913	16.1783	0.647933	0.530101	6	0.0910766
MT1E	1.05933e-55	1.86349e-54	1.66821	0.583032	0.846957	15.6786	0.647739	0.508392	6	0.0139102
RPS6KA3	5.58207e-78	1.53361e-76	0.433264	0.751032	0.549565	18.6566	0.647724	0.504749	6	0.126608
MRPL3	3.05349e-76	8.14505e-75	0.40369	0.680119	0.561739	18.4415	0.647657	0.513643	6	0.138034
GTF3C6	9.17243e-61	1.79905e-59	0.7414	0.581685	0.729565	16.4025	0.64761	0.543093	6	0.148653
GNE	6.72133e-99	2.58815e-97	0.281443	0.837617	0.451304	21.0752	0.646814	0.523643	6	0.232794
CHMP3	5.72406e-63	1.18445e-61	0.598184	0.594177	0.695652	16.7081	0.646587	0.52972	6	0.167811
SPTSSA	3.39688e-92	1.16985e-90	0.319732	0.813371	0.472174	20.3313	0.646369	0.552242	6	0.261514
PODXL	1.9615e-86	6.09687e-85	0.36193	0.709267	0.5	19.6697	0.646287	0.530576	6	-0.187627
TCEAL8	2.7248e-79	7.61438e-78	0.387186	0.767241	0.530435	18.8173	0.64624	0.507396	6	0.165968
LPP	4.37078e-64	9.33387e-63	0.579292	0.594824	0.677391	16.8608	0.64618	0.526707	6	0.185605
CRABP2	4.88009e-143	3.39316e-141	0.296082	1.27865	0.364348	25.4373	0.646139	0.559699	6	0.608087
HERPUD1	1.73515e-60	3.38966e-59	0.791384	0.589606	0.718261	16.3638	0.64557	0.517887	6	-0.0112466
PRELID1	1.57851e-56	2.83109e-55	0.91879	0.513536	0.794783	15.7991	0.645567	0.537202	6	0.100152
TXN2	3.87385e-67	8.71676e-66	0.47142	0.574915	0.624348	17.2712	0.645289	0.524268	6	0.155402
RAB2A	3.06567e-55	5.28513e-54	0.967586	0.515461	0.832174	15.611	0.645276	0.554328	6	0.13919
MET	2.01665e-69	4.72624e-68	0.573872	0.507812	0.625217	17.5721	0.645226	0.400722	4	-0.720033
FHL2	8.97819e-92	3.05613e-90	0.426678	0.607806	0.485217	20.2836	0.645059	0.446301	4	-0.79106
TST	1.64287e-81	4.76336e-80	0.348479	0.762531	0.507826	19.0862	0.645025	0.53965	6	0.268089
TPM4	1.22537e-60	2.4002e-59	0.974987	0.396322	0.748696	16.3849	0.644885	0.252788	4	-1.01777
GSTA4	3.46384e-171	3.27858e-169	0.203015	1.24379	0.333913	27.8658	0.644824	0.590928	6	0.794372
METTL9	2.64871e-63	5.55926e-62	0.543311	0.613963	0.653043	16.754	0.644701	0.516364	6	0.0987444
SERPINF1	7.89211e-61	1.55208e-59	0.796032	0.695217	0.67913	16.4117	0.644607	0.501099	6	0.126961
CDK4	4.55843e-101	1.85769e-99	0.267506	0.821287	0.433913	21.3103	0.644599	0.567543	6	0.25983
APRT	6.1774e-55	1.05505e-53	0.976777	0.512059	0.815652	15.5662	0.644496	0.525124	6	0.0513324
CNN2	3.54598e-67	7.99126e-66	0.543757	0.625361	0.612174	17.2763	0.644347	0.508586	4	-0.188322
GCNT3	3.03156e-129	1.79339e-127	0.332239	1.15202	0.376522	24.1586	0.644206	0.568182	4	0.143835
KCNE3	4.48013e-90	1.49382e-88	0.350187	0.884789	0.465217	20.0904	0.643984	0.502424	6	0.197426
DGKA	7.00109e-131	4.27971e-129	0.247253	1.11445	0.368696	24.3138	0.643223	0.580083	4	0.381388
SDF4	2.8405e-60	5.50501e-59	0.613811	0.577112	0.671304	16.3337	0.643057	0.524877	6	0.124006
MALL	2.93353e-78	8.12033e-77	0.568505	0.696835	0.523478	18.6909	0.643038	0.416877	4	-0.727066
DHRS7	1.07272e-64	2.30422e-63	0.499706	0.581321	0.625217	16.9436	0.642922	0.56333	6	0.356178
VEGFA	2.03631e-95	7.48741e-94	0.345894	0.84411	0.443478	20.6922	0.642826	0.518832	6	-0.0750604
NDFIP1	1.49351e-54	2.51565e-53	0.858728	0.51903	0.786087	15.5096	0.642633	0.564252	4	0.174479
CAPN13	1.05106e-131	6.53393e-130	0.272409	1.25351	0.361739	24.3916	0.642624	0.559973	6	0.656886
NPM1	6.17712e-51	9.44005e-50	1.6065	0.457947	0.876522	14.9654	0.642524	0.537587	6	0.0217509
ATP5MC3	3.53803e-51	5.45808e-50	1.46569	0.484249	0.864348	15.0024	0.642442	0.580611	6	0.145074
NAPRT	1.16189e-70	2.78988e-69	0.434944	0.616612	0.567826	17.7332	0.642363	0.527132	6	0.215726
TPD52L1	9.24477e-157	7.70625e-155	0.179446	1.0846	0.335652	26.6488	0.641909	0.559792	6	0.451972
SLC52A2	1.6059e-86	5.0128e-85	0.314043	0.830382	0.45913	19.6798	0.64189	0.533344	6	0.340486
NAXE	1.63038e-63	3.43176e-62	0.485525	0.595321	0.617391	16.7828	0.641485	0.478312	6	-0.0397789
LSR	1.72833e-55	3.00787e-54	0.824029	0.520742	0.748696	15.6475	0.641426	0.512595	4	-0.0792766
PABPC4	2.39012e-61	4.77732e-60	0.566292	0.562261	0.64	16.484	0.641402	0.540226	6	0.11857
ITM2B	4.10228e-49	5.98851e-48	2.637	0.324733	0.96087	14.6837	0.641292	0.551697	5	0.0726032
HMGB3	5.65172e-63	1.17114e-61	0.63881	0.647896	0.625217	16.7088	0.641201	0.454099	6	-0.0949159
IL33	4.84051e-116	2.36717e-114	0.323527	1.21544	0.38	22.868	0.641158	0.56546	6	0.702951
KLF3	4.26635e-60	8.23573e-59	0.626487	0.650885	0.64	16.3089	0.641044	0.551612	6	0.174678
MAOA	2.90614e-82	8.5443e-81	0.358951	0.856929	0.473913	19.1765	0.640977	0.560209	6	0.511087
RAI14	3.97369e-77	1.0776e-75	0.350745	0.738359	0.50087	18.5514	0.640516	0.533886	6	0.144905
SRPRB	8.25937e-77	2.22336e-75	0.35312	0.7227	0.501739	18.512	0.640457	0.532054	6	0.3384
STX10	8.42882e-68	1.9172e-66	0.416291	0.587469	0.566087	17.359	0.64039	0.512861	6	-0.105939
KLF5	1.98939e-50	2.99347e-49	1.43033	0.507187	0.829565	14.8874	0.64009	0.48931	1	-0.0797649
TSHZ2	4.50146e-63	9.39416e-62	0.541404	0.615589	0.607826	16.7224	0.640012	0.52416	6	0.21634
BTG2	5.96043e-63	1.22989e-61	0.69666	0.732037	0.59913	16.7057	0.639768	0.47805	6	-0.0632834
CMTM7	9.0447e-76	2.3866e-74	0.366259	0.751965	0.5	18.3827	0.639645	0.512959	6	0.102974
CCS	1.45369e-89	4.80339e-88	0.266803	0.744699	0.441739	20.0318	0.639499	0.516365	6	0.220995
GDI2	1.36086e-54	2.29485e-53	0.70259	0.533956	0.723478	15.5156	0.639381	0.527617	2	0.109718
SLC1A5	2.905e-71	7.09138e-70	0.419407	0.558668	0.536522	17.811	0.639378	0.499356	1	-0.849125
LAMP1	4.57509e-55	7.85042e-54	0.661383	0.530018	0.72	15.5854	0.639147	0.535024	6	0.180266
ARFGAP3	6.79421e-62	1.37297e-60	0.472855	0.565867	0.613043	16.5599	0.638939	0.52844	6	0.180735
PDCD4	3.84308e-63	8.04305e-62	0.465416	0.630267	0.588696	16.7318	0.63881	0.528831	2	0.203719
CDC42EP4	7.02999e-71	1.69456e-69	0.406469	0.745173	0.521739	17.7614	0.638694	0.511587	6	0.20024
MFSD4A	3.51472e-110	1.61644e-108	0.246392	0.971321	0.382609	22.2712	0.638614	0.548488	6	0.413497
SPINT1-AS1	2.42325e-54	4.04915e-53	0.67292	0.506364	0.726957	15.4785	0.638541	0.507048	6	0.058123
SRPRA	4.27448e-68	9.78329e-67	0.386181	0.646356	0.541739	17.398	0.638471	0.546807	6	0.248391
FAM3C	1.23184e-53	2.03976e-52	0.784345	0.570586	0.711304	15.3735	0.638396	0.5565	4	0.120611
SMCO4	4.21456e-98	1.60186e-96	0.251747	0.847512	0.409565	20.9881	0.638312	0.489488	6	0.0616185
STRAP	1.58609e-58	2.9605e-57	0.528208	0.543066	0.645217	16.0865	0.638306	0.536468	6	0.174842
CFL1	2.00002e-47	2.82409e-46	1.93673	0.389261	0.927826	14.4178	0.638218	0.352125	4	-0.214019
ARPC5	2.25645e-57	4.11234e-56	0.579752	0.47436	0.673043	15.9212	0.638148	0.505344	4	-0.210334
DUSP1	1.7181e-48	2.47605e-47	1.80179	0.509718	0.855652	14.5862	0.638117	0.504761	1	0.0392073
ATP13A2	3.81658e-87	1.20935e-85	0.278758	0.822665	0.437391	19.7525	0.638106	0.537494	6	0.313343
OLA1	5.07976e-65	1.09757e-63	0.415431	0.634693	0.558261	16.9875	0.637805	0.534955	6	0.225163
LMNA	1.8323e-48	2.63546e-47	1.51705	0.561475	0.82	14.5818	0.637751	0.54187	4	0.159499
MPZL1	1.99139e-77	5.45068e-76	0.306336	0.708491	0.478261	18.5885	0.637586	0.520861	6	0.225789
DNAJC17	2.87604e-99	1.11921e-97	0.253913	0.920789	0.398261	21.1153	0.637273	0.553668	6	0.518655
JUP	2.28248e-56	4.07375e-55	0.726769	0.517212	0.669565	15.7758	0.637266	0.41197	4	-0.555836
TMEM263	5.67324e-87	1.7861e-85	0.280686	0.797011	0.432174	19.7325	0.636858	0.515426	6	0.206024
LGALS9B	1.98498e-84	5.96755e-83	0.316622	0.897055	0.43913	19.4341	0.636817	0.523207	6	0.294356
ELL2	1.28065e-67	2.90393e-66	0.412885	0.637111	0.530435	17.335	0.636591	0.546836	4	-0.0643346
AP2M1	2.09974e-51	3.28414e-50	0.743406	0.514114	0.73913	15.037	0.636572	0.557464	6	0.210883
SLC5A8	6.30921e-148	4.82096e-146	0.269203	1.43048	0.321739	25.8753	0.636461	0.523736	6	0.381324
ARPC1B	1.35606e-52	2.18624e-51	0.712143	0.500425	0.726087	15.2174	0.636419	0.573008	6	0.315283
AP2S1	4.58751e-52	7.30764e-51	0.724191	0.498967	0.736522	15.1374	0.636418	0.512061	6	0.058741
NIPAL2	4.49753e-101	1.83797e-99	0.247079	0.969186	0.387826	21.3109	0.636292	0.566509	6	0.596711
HMGN1	1.62254e-46	2.23514e-45	1.59756	0.430714	0.913043	14.2725	0.636244	0.541086	6	0.031725
ALDOA	6.52348e-53	1.0634e-51	1.31828	0.74205	0.633043	15.2652	0.635848	0.476127	4	-0.138221
SPCS2	8.86777e-49	1.28556e-47	0.944534	0.480585	0.813913	14.6313	0.635751	0.548784	6	0.195972
OSTF1	2.74766e-72	6.89075e-71	0.365163	0.742302	0.486087	17.9425	0.635704	0.578457	4	0.219932
HMGA1	1.26779e-54	2.14778e-53	0.834271	0.455863	0.683478	15.5201	0.635694	0.351497	4	-0.795317
APEX1	5.79988e-60	1.11374e-58	0.467321	0.608385	0.584348	16.2901	0.635484	0.540317	2	0.249809
AGPAT2	9.14601e-53	1.4794e-51	0.699155	0.567628	0.690435	15.2431	0.635369	0.471554	6	-0.0621798
CRYL1	3.30054e-93	1.15566e-91	0.233899	0.849837	0.403478	20.4454	0.63533	0.521635	6	0.241194
CHMP4B	2.08187e-47	2.93684e-46	1.17304	0.480195	0.833043	14.415	0.635316	0.522541	4	0.0779793
HEY1	9.44255e-122	5.1308e-120	0.246755	1.18061	0.347826	23.4348	0.63528	0.520605	6	0.355121
MAPK13	1.34192e-94	4.86106e-93	0.239731	0.853319	0.4	20.6011	0.634991	0.552641	6	0.245904
NHP2	6.03321e-51	9.22974e-50	0.7347	0.499927	0.727826	14.967	0.63497	0.459657	6	-0.134148
LDLRAP1	4.01408e-92	1.37595e-90	0.245823	0.831354	0.405217	20.3231	0.634947	0.555384	6	0.431504
TPI1	7.16082e-46	9.67371e-45	1.49351	0.436931	0.893913	14.1687	0.634942	0.551333	4	0.161394
KRTCAP2	1.94048e-46	2.66064e-45	1.21862	0.458609	0.854783	14.2601	0.63465	0.571287	6	0.136529
MPG	1.25767e-55	2.20445e-54	0.505422	0.536551	0.64	15.6677	0.634553	0.497357	6	0.0580762
TRPM4	7.11521e-99	2.73265e-97	0.249556	0.892026	0.387826	21.0725	0.634529	0.554607	6	0.504402
PGLS	2.59036e-48	3.72215e-47	0.882364	0.49062	0.787826	14.5582	0.634432	0.511246	6	0.0194656
PGD	1.27443e-54	2.15654e-53	0.669459	0.653044	0.621739	15.5198	0.634379	0.568988	4	0.195513
CEBPD	1.58761e-50	2.39382e-49	0.867543	0.572108	0.715652	14.9025	0.634334	0.512279	6	0.119464
PGAM1	9.6805e-51	1.47326e-49	0.749535	0.526245	0.716522	14.9355	0.634216	0.547994	4	0.0607769
MFSD1	2.74344e-57	4.98132e-56	0.467263	0.51096	0.616522	15.909	0.634176	0.529655	2	0.168401
VSIR	1.45204e-62	2.9711e-61	0.478986	0.661481	0.543478	16.6525	0.633986	0.543432	4	-0.0231517
TMEM230	2.72291e-51	4.23175e-50	0.624454	0.504516	0.706957	15.0198	0.633564	0.459284	6	-0.097227
OVCA2	1.31536e-113	6.34789e-112	0.232664	0.994332	0.354783	22.622	0.633557	0.553013	4	0.156422
RPS19BP1	2.53986e-50	3.81396e-49	0.679082	0.485048	0.721739	14.8711	0.633511	0.493411	6	-0.0663486
ADAM15	1.40277e-52	2.25906e-51	0.647525	0.508694	0.662609	15.2152	0.633447	0.454114	6	-0.22446
EIF3L	4.29287e-51	6.60175e-50	0.652687	0.495723	0.701739	14.9896	0.633446	0.464512	6	-0.0885853
SEC11A	3.62312e-49	5.29431e-48	0.720482	0.457628	0.750435	14.6921	0.633439	0.504753	6	0.0172305
ELOVL1	3.82065e-71	9.29565e-70	0.322205	0.635006	0.481739	17.7956	0.633213	0.574925	6	0.186437
HCAR2	1.38901e-99	5.49278e-98	0.280277	0.985727	0.377391	21.1497	0.633195	0.537595	6	0.44758
CRELD2	1.03618e-55	1.82495e-54	0.52795	0.585393	0.614783	15.68	0.633168	0.485527	6	0.0370914
TFF3	1.55365e-44	2.03879e-43	3.14077	0.695239	0.842609	13.9509	0.633148	0.415438	6	-0.273128
SNHG8	2.40038e-51	3.74205e-50	0.701836	0.334243	0.708696	15.0282	0.632887	0.330453	1	-1.22757
DUSP5	1.76143e-65	3.86277e-64	0.671782	0.586509	0.532174	17.0495	0.632791	0.387182	4	-0.849981
KCNK6	1.73833e-98	6.65875e-97	0.242926	0.856359	0.381739	21.0301	0.632748	0.545647	6	0.0451115
CCNO	2.15223e-55	3.7235e-54	0.733882	0.507826	0.613913	15.6335	0.6327	0.364661	6	-0.962447
SFT2D1	2.12995e-51	3.32785e-50	0.598098	0.507736	0.686957	15.0361	0.632582	0.507649	6	0.0736682
FBXW5	2.18597e-54	3.66939e-53	0.516106	0.445839	0.632174	15.4851	0.632528	0.489368	1	-0.665936
MAF1	2.40631e-63	5.05772e-62	0.363058	0.584658	0.529565	16.7597	0.63249	0.516509	6	0.158104
OAS1	1.45402e-51	2.28394e-50	0.951754	0.578654	0.664348	15.0613	0.632476	0.45467	4	-0.342762
NT5DC2	1.40872e-128	8.20132e-127	0.206355	1.10488	0.327826	24.095	0.632457	0.513304	6	0.291849
SPCS3	1.36046e-55	2.38177e-54	0.506181	0.512437	0.616522	15.6627	0.632341	0.517457	6	-0.212513
FUT3	1.44365e-72	3.6454e-71	0.357413	0.636602	0.469565	17.9782	0.632312	0.512011	4	-0.354481
RPL7	2.54615e-43	3.26812e-42	2.7308	0.371681	0.963478	13.75	0.632299	0.43483	6	-0.108149
TSPAN12	1.02035e-126	5.82472e-125	0.196342	1.06409	0.331304	23.917	0.632188	0.50802	6	0.181015
MYO1C	2.50393e-77	6.80281e-76	0.293701	0.702777	0.446957	18.5762	0.632071	0.517535	6	-0.00106566
TENT5C	4.20487e-79	1.17058e-77	0.312195	0.762607	0.435652	18.7943	0.631969	0.481315	6	0.0586833
TMC6	6.94838e-81	1.99491e-79	0.266848	0.710908	0.426957	19.0107	0.631627	0.559685	6	0.178906
FAM83A	2.65053e-141	1.8171e-139	0.200209	1.15538	0.313043	25.28	0.631488	0.5547	6	0.619095
RCN1	2.76076e-60	5.35755e-59	0.396456	0.5647	0.553043	16.3355	0.631484	0.564354	6	0.231734
CCDC6	2.21005e-60	4.31166e-59	0.425717	0.646689	0.536522	16.349	0.631324	0.534822	6	0.165669
CD63	1.24024e-42	1.55784e-41	2.45714	0.370448	0.953043	13.635	0.631128	0.507284	6	0.0350395
RSL1D1	1.76154e-55	3.06203e-54	0.467781	0.531423	0.594783	15.6463	0.630924	0.549969	6	0.178128
SLC35B2	5.77352e-81	1.66085e-79	0.25139	0.762402	0.41913	19.0205	0.630922	0.509028	6	0.1692
CXCL16	4.70609e-54	7.83689e-53	0.598952	0.486712	0.62	15.4357	0.630914	0.459762	4	-0.423724
CAPN1	2.87753e-48	4.12268e-47	0.70141	0.504434	0.704348	14.551	0.63066	0.53979	2	0.169788
SYNPO	4.79652e-121	2.54963e-119	0.214637	1.07558	0.331304	23.3655	0.630594	0.506025	6	0.201951
GPRC5C	9.25542e-64	1.96223e-62	0.387601	0.640875	0.505217	16.8164	0.630547	0.559735	6	-0.0815066
ATP5F1C	8.36187e-46	1.12548e-44	0.88913	0.496391	0.762609	14.1578	0.630539	0.574384	6	0.24725
DBNL	2.66938e-61	5.31378e-60	0.379504	0.59365	0.529565	16.4773	0.630521	0.552526	6	0.378719
MZT2A	1.91662e-54	3.22093e-53	0.491181	0.525768	0.602609	15.4936	0.630504	0.414844	6	-0.333658
TNFRSF14	1.37006e-53	2.26608e-52	0.492488	0.515326	0.617391	15.3666	0.630435	0.504968	2	-0.060844
TMEM125	4.64747e-50	6.93622e-49	0.599162	0.511529	0.684348	14.8306	0.630391	0.4304	6	-0.158489
POLDIP2	5.19969e-65	1.12183e-63	0.32994	0.641761	0.495652	16.9862	0.630295	0.531027	6	0.239163
VDAC1	1.10608e-45	1.47924e-44	0.842641	0.459145	0.774783	14.1381	0.630287	0.562116	6	0.192241
CPD	7.15016e-48	1.01746e-46	0.698362	0.492574	0.728696	14.4886	0.630266	0.450759	6	-0.088383
GSS	7.03419e-71	1.69456e-69	0.283864	0.644671	0.457391	17.7614	0.629811	0.534672	6	0.294611
CMTM8	2.25941e-60	4.40209e-59	0.371586	0.580104	0.532174	16.3477	0.629727	0.516262	6	0.177325
THOC3	1.10832e-76	2.97806e-75	0.310527	0.841348	0.422609	18.4962	0.629706	0.548424	6	0.362941
PHF20L1	2.26852e-59	4.29993e-58	0.408296	0.615632	0.531304	16.2065	0.629564	0.552223	6	0.349205
HDDC2	2.34227e-58	4.3498e-57	0.387794	0.572146	0.545217	16.0624	0.62943	0.478117	6	0.00851879
TCEAL9	2.47009e-76	6.60084e-75	0.296853	0.796746	0.427826	18.4529	0.629402	0.524439	6	0.348201
MCL1	7.07275e-45	9.33972e-44	1.02787	0.489187	0.78	14.0069	0.629349	0.490784	4	-0.0931261
SLC25A1	1.50546e-57	2.75393e-56	0.406978	0.60624	0.544348	15.9465	0.629199	0.51549	6	0.194754
IFITM2	2.76651e-52	4.42612e-51	0.905273	0.670585	0.596522	15.1706	0.629086	0.532605	2	0.113469
PTGES2	1.97795e-68	4.55548e-67	0.297023	0.654474	0.46087	17.4421	0.629066	0.512469	6	0.198168
GNPTAB	3.51622e-89	1.14892e-87	0.234463	0.810885	0.386087	19.9878	0.629062	0.525992	6	0.250583
SLC35B1	1.33065e-56	2.39239e-55	0.418166	0.570263	0.558261	15.8098	0.62904	0.480293	6	0.0311002
HNRNPAB	3.48381e-49	5.1009e-48	0.625533	0.510854	0.66087	14.6947	0.62902	0.458831	6	-0.178453
EEF1G	6.23014e-72	1.54657e-70	0.30999	0.767807	0.44087	17.8969	0.628844	0.543757	6	0.418264
ASCC2	8.03522e-66	1.77004e-64	0.316301	0.627275	0.48	17.0954	0.628784	0.521711	6	0.214924
HOMER2	1.88189e-87	5.98897e-86	0.227854	0.767257	0.387826	19.7882	0.628753	0.554372	6	0.420874
SBDS	1.03195e-50	1.56726e-49	0.580971	0.481123	0.644348	14.9312	0.628676	0.48128	4	-0.285204
CYB5R3	5.38163e-49	7.84051e-48	0.545149	0.456027	0.669565	14.6652	0.628457	0.537517	2	0.167095
EBAG9	1.81844e-56	3.24949e-55	0.38733	0.563377	0.553913	15.7902	0.628092	0.495881	6	0.0583899
FKBP1A	1.62424e-43	2.09579e-42	0.945238	0.445751	0.804348	13.7825	0.628	0.522908	6	0.0482985
NEK6	8.89026e-103	3.69487e-101	0.213672	0.974461	0.346957	21.4938	0.627951	0.556583	6	0.558675
PI3	1.7717e-121	9.52108e-120	0.280478	1.14523	0.321739	23.408	0.627891	0.501624	6	0.136398
CYCS	5.84705e-44	7.6048e-43	0.877038	0.450099	0.772174	13.856	0.627734	0.538842	6	0.0959134
VASP	2.4408e-61	4.86534e-60	0.368988	0.607404	0.504348	16.4827	0.627645	0.530657	4	-0.0849267
STEAP2	7.83429e-101	3.17505e-99	0.215804	0.934889	0.350435	21.2849	0.627532	0.550965	6	0.501183
DPM2	2.90307e-62	5.89903e-61	0.313959	0.493135	0.495652	16.611	0.627298	0.534183	6	-0.321463
TSKU	1.31942e-118	6.79199e-117	0.187935	1.00226	0.321739	23.1243	0.627293	0.559929	6	0.557526
ZDHHC16	1.925e-83	5.75186e-82	0.232872	0.815744	0.388696	19.3172	0.627198	0.523218	6	0.256665
MGST2	2.4847e-45	3.3049e-44	0.712271	0.449379	0.73913	14.081	0.627186	0.500077	6	0.0210479
CNPY2	2.60905e-50	3.91384e-49	0.51394	0.490153	0.628696	14.8693	0.627075	0.449655	6	-0.127222
QARS	3.76201e-55	6.47798e-54	0.398596	0.534714	0.557391	15.5979	0.626846	0.47802	6	0.000334266
TMEM92	5.78249e-112	2.71038e-110	0.186481	0.93055	0.329565	22.4545	0.626794	0.554656	6	0.18549
CDC42EP2	2.17726e-100	8.70372e-99	0.213395	0.843138	0.348696	21.2369	0.626628	0.555753	4	0.0944348
KRAS	5.20779e-49	7.59478e-48	0.541722	0.49635	0.630435	14.6675	0.626434	0.544697	4	-0.0031812
MYADM	4.29061e-51	6.60175e-50	0.652221	0.59922	0.587826	14.9896	0.626132	0.490811	4	-0.252216
ALG5	2.1744e-58	4.04317e-57	0.345837	0.518703	0.517391	16.067	0.626075	0.481976	6	0.0098392
EBP	1.55823e-65	3.42228e-64	0.315031	0.589791	0.465217	17.0567	0.626044	0.512737	6	0.201455
TAPBPL	2.91062e-66	6.47978e-65	0.300007	0.644725	0.456522	17.1545	0.626007	0.529286	6	0.293542
CYBA	1.30311e-39	1.50891e-38	2.05751	0.334525	0.938261	13.1177	0.626005	0.595793	6	0.116231
CDK6	2.91596e-85	8.87554e-84	0.234756	0.72673	0.381739	19.5323	0.625904	0.555888	6	0.247448
DCTPP1	5.19029e-63	1.0801e-61	0.315105	0.624961	0.476522	16.7139	0.625785	0.506729	6	0.128354
MED24	1.25277e-55	2.1985e-54	0.416783	0.606897	0.535652	15.6679	0.625783	0.479363	6	0.052211
SDCBP2	2.46285e-58	4.56795e-57	0.490676	0.379929	0.533043	16.0592	0.62559	0.374544	4	-1.00896
TMEM45A	1.06097e-129	6.37931e-128	0.359758	1.63123	0.30087	24.202	0.625585	0.457138	6	-0.0106343
POLE4	8.91315e-53	1.44332e-51	0.412098	0.486467	0.571304	15.2448	0.625522	0.46647	6	-0.0867623
TIMM8B	5.62093e-43	7.1398e-42	0.810881	0.443209	0.766087	13.6926	0.625508	0.509108	6	0.0256154
CYP4F12	2.09185e-132	1.30594e-130	0.177083	1.07106	0.30087	24.4575	0.6255	0.563348	6	0.583234
RDH11	2.75727e-73	7.04737e-72	0.259946	0.719085	0.417391	18.0698	0.625454	0.520131	6	0.282932
NINJ1	4.55294e-68	1.03882e-66	0.321201	0.393198	0.453913	17.3943	0.625337	0.41206	1	-1.45547
OXA1L	1.11935e-52	1.8066e-51	0.408385	0.518466	0.563478	15.2299	0.625296	0.523162	2	0.142425
NME1	9.91785e-59	1.85593e-57	0.361556	0.533191	0.510435	16.1156	0.625243	0.464831	6	-0.0340967
AMD1	2.97233e-53	4.87774e-52	0.449247	0.500002	0.552174	15.3164	0.625099	0.510951	6	-0.362825
PPP1CC	3.51692e-49	5.14423e-48	0.479232	0.490864	0.611304	14.6941	0.624964	0.51968	6	0.12462
TNFRSF1A	5.26216e-51	8.07544e-50	0.43536	0.459311	0.589565	14.9761	0.62492	0.543845	6	0.0806746
MANF	1.38535e-46	1.91379e-45	0.651633	0.505062	0.654783	14.2836	0.624896	0.472629	6	-0.0164148
PPIA	9.28903e-39	1.04911e-37	2.25977	0.326491	0.927826	12.968	0.624669	0.397805	4	-0.177257
EIF2A	6.84346e-56	1.2111e-54	0.35437	0.549021	0.521739	15.7063	0.624389	0.542747	2	0.255435
S100A2	2.82182e-51	4.38083e-50	1.5622	0.547284	0.575652	15.0175	0.624332	0.30695	4	-1.10472
GSPT1	1.08695e-42	1.36881e-41	0.726285	0.44107	0.741739	13.6446	0.624147	0.501641	6	0.0234299
PMVK	3.94172e-56	7.02661e-55	0.366373	0.567221	0.514783	15.7413	0.624136	0.466395	6	-0.0455015
ARF5	1.0099e-42	1.27288e-41	0.789152	0.495879	0.711304	13.65	0.624131	0.526271	2	0.104265
RNF145	1.33781e-41	1.62476e-40	0.90068	0.442451	0.773913	13.4604	0.624102	0.532899	6	0.0766359
MRPL34	4.48264e-55	7.7008e-54	0.356395	0.534013	0.525217	15.5867	0.624055	0.505347	6	0.107977
PHB2	1.09896e-46	1.52823e-45	0.539252	0.476992	0.637391	14.2997	0.623991	0.521978	6	0.1295
ILVBL	3.21651e-65	6.99102e-64	0.284406	0.636055	0.445217	17.0143	0.623893	0.527437	6	0.283701
NME4	1.69445e-94	6.12296e-93	0.198788	0.870461	0.344348	20.5898	0.623828	0.511207	6	0.217921
BTG1	9.48876e-42	1.15658e-40	0.948036	0.327712	0.78	13.4857	0.623702	0.259184	1	-1.13362
BABAM1	2.43661e-61	4.86361e-60	0.299086	0.584731	0.472174	16.4829	0.623701	0.480907	6	0.0274129
LRRC8A	2.16735e-57	3.95488e-56	0.502573	0.450036	0.516522	15.9238	0.623508	0.384308	4	-0.938271
NUCB1	3.00985e-50	4.50587e-49	0.428232	0.444491	0.58087	14.8597	0.623434	0.534754	2	0.0462342
TRIB1	1.67351e-58	3.11575e-57	0.444585	0.713679	0.48087	16.0832	0.623397	0.534692	6	0.0494192
LSM10	5.43987e-73	1.38316e-71	0.234269	0.648031	0.406957	18.0322	0.623378	0.53699	6	0.246947
YIF1A	5.91794e-43	7.51056e-42	0.674835	0.437439	0.713913	13.6889	0.623363	0.504818	6	0.0362504
RPIA	1.1867e-75	3.12568e-74	0.238584	0.712515	0.395652	18.3679	0.623339	0.54782	6	0.418534
CHP1	4.40908e-48	6.29237e-47	0.486757	0.513149	0.604348	14.5218	0.623331	0.494729	6	0.0613976
PACSIN3	9.362e-117	4.62458e-115	0.177031	0.979831	0.308696	22.9396	0.623319	0.569439	6	0.407371
EPN3	9.46467e-80	2.67031e-78	0.243489	0.809817	0.38	18.8732	0.623211	0.53891	6	0.407089
NTHL1	2.59524e-58	4.80137e-57	0.348768	0.501602	0.493043	16.056	0.623131	0.495666	6	0.11169
DHX29	6.95331e-53	1.13221e-51	0.391557	0.540167	0.536522	15.261	0.62304	0.511166	6	0.157339
NAA50	6.04506e-52	9.59817e-51	0.399518	0.466604	0.553913	15.1193	0.622954	0.525638	4	-0.166964
ENO1	3.68471e-40	4.31776e-39	1.04711	0.412434	0.793043	13.2131	0.622725	0.473987	6	-0.175217
ZBTB7C	1.35199e-68	3.1335e-67	0.273916	0.735433	0.41913	17.4638	0.622666	0.4995	6	0.129037
HEXB	3.72795e-51	5.74503e-50	0.4094	0.475701	0.555652	14.999	0.62259	0.542306	6	0.274336
DNAJC15	1.44021e-42	1.80747e-41	0.7193	0.456118	0.69913	13.6241	0.622575	0.521502	6	0.0845958
RAB27B	4.62864e-72	1.15488e-70	0.260084	0.622547	0.405217	17.9135	0.62239	0.539448	4	-0.227948
CALU	1.28912e-54	2.17638e-53	0.363341	0.569657	0.508696	15.5191	0.622182	0.493488	6	0.0802801
ARF1	8.76933e-39	9.91178e-38	1.14143	0.423837	0.84087	12.9724	0.622132	0.532338	4	0.1239
GPX2	1.06537e-61	2.14698e-60	0.650466	1.23145	0.423478	16.5328	0.622074	0.539809	6	0.78116
NDUFS8	9.16616e-40	1.06474e-38	0.905775	0.412274	0.801739	13.1444	0.622047	0.522383	6	0.0589122
OS9	7.02482e-45	9.28479e-44	0.514644	0.435453	0.649565	14.0074	0.621934	0.519392	6	0.146929
SOCS3	3.84507e-58	7.07792e-57	0.600868	0.908527	0.46	16.0316	0.621873	0.491789	6	0.176069
PYCR1	2.30209e-133	1.47484e-131	0.178393	1.07388	0.286957	24.5475	0.621667	0.54899	6	0.314272
VCL	2.8567e-58	5.27178e-57	0.375989	0.506376	0.485217	16.05	0.62154	0.480647	4	-0.444869
PHB	1.12499e-43	1.45673e-42	0.580034	0.458509	0.654783	13.809	0.621345	0.519089	6	0.117349
STT3B	7.67418e-53	1.2482e-51	0.370957	0.551807	0.514783	15.2546	0.621196	0.481649	6	0.0618387
SRP72	5.5685e-51	8.53662e-50	0.39184	0.515721	0.538261	14.9723	0.621175	0.52803	6	0.20091
CNN3	7.66753e-42	9.38201e-41	0.72308	0.449905	0.70087	13.5014	0.621037	0.518479	4	-0.0770511
VPS37B	1.21939e-46	1.6893e-45	0.547434	0.454385	0.59913	14.2924	0.620798	0.465941	4	-0.400218
C1orf210	8.82862e-97	3.29579e-95	0.180865	0.884728	0.327826	20.843	0.620747	0.556163	6	0.510098
SRPX2	1.64581e-72	4.14875e-71	0.304408	0.823247	0.390435	17.9709	0.620719	0.560542	6	0.214624
SDHD	8.63995e-51	1.31627e-49	0.389179	0.526858	0.533913	14.9431	0.620676	0.541706	6	0.246909
GTF3A	2.21875e-44	2.8986e-43	0.532814	0.464198	0.633913	13.9254	0.620675	0.474483	6	-0.0372219
FUCA1	2.20277e-54	3.69335e-53	0.353528	0.573169	0.50087	15.4846	0.620576	0.489298	2	0.016519
RALY	6.94081e-42	8.49988e-41	0.626094	0.417215	0.687826	13.5088	0.620574	0.543671	6	0.142042
GALNT5	6.05674e-61	1.19273e-59	0.403886	0.355224	0.471304	16.4277	0.620535	0.385135	4	-1.0976
SLITRK6	1.36381e-97	5.13037e-96	0.226484	0.98017	0.325217	20.9322	0.620184	0.566766	6	0.728038
TUBA4A	1.76462e-92	6.10585e-91	0.197066	0.661461	0.33913	20.3634	0.620155	0.541127	4	-0.263565
MGAT1	2.45166e-49	3.60403e-48	0.410326	0.442346	0.552174	14.7185	0.620154	0.52864	6	0.00852168
SEC31A	1.50533e-42	1.88436e-41	0.59869	0.466305	0.661739	13.6208	0.620103	0.52474	6	0.129955
ETFA	1.16225e-51	1.83545e-50	0.354856	0.522909	0.516522	15.0761	0.619991	0.537197	6	0.284814
UBE2J1	5.32749e-46	7.22363e-45	0.463238	0.43457	0.591304	14.1894	0.619876	0.525877	6	-0.032173
ASPG	1.5201e-132	9.53054e-131	0.193672	1.20043	0.28	24.4706	0.619772	0.51501	6	0.33069
BSPRY	1.57006e-63	3.30953e-62	0.260044	0.62934	0.426957	16.785	0.619745	0.492707	6	0.0494475
RABAC1	8.11994e-38	8.9368e-37	1.07929	0.455722	0.815652	12.8007	0.619737	0.468294	6	-0.0673141
SCAMP3	2.33047e-61	4.66444e-60	0.265561	0.559301	0.43913	16.4855	0.619663	0.547237	6	0.137274
APPL1	1.35299e-63	2.85608e-62	0.289669	0.670714	0.422609	16.7939	0.619622	0.52888	6	0.335141
RHOB	6.53271e-38	7.20611e-37	1.24717	0.470338	0.788696	12.8176	0.619602	0.500823	6	0.0373881
PAX9	3.08068e-48	4.40513e-47	0.450684	0.524736	0.547826	14.5463	0.619434	0.533018	2	-0.0265458
STN1	3.06941e-52	4.90538e-51	0.380695	0.586772	0.501739	15.1638	0.619385	0.498164	6	0.0852919
CORO1B	2.12589e-41	2.5691e-40	0.591445	0.436545	0.670435	13.4261	0.619107	0.51745	2	0.0937192
RPS6KB2	1.11225e-50	1.68572e-49	0.334532	0.445396	0.52087	14.9262	0.618705	0.49607	6	0.0690497
CMAS	8.53653e-49	1.23877e-47	0.380611	0.488818	0.538261	14.6339	0.618649	0.526674	6	0.221932
TMEM147	2.2572e-40	2.65987e-39	0.631231	0.417513	0.701739	13.25	0.618594	0.490186	6	-0.010558
SOX21	5.86158e-77	1.58371e-75	0.261284	0.889291	0.362609	18.5305	0.618563	0.479961	6	0.0689475
AP1S1	1.14014e-54	1.93376e-53	0.305182	0.560747	0.478261	15.5269	0.618545	0.491142	6	0.0544977
B4GALT1	1.74703e-45	2.33144e-44	0.490619	0.499927	0.578261	14.1059	0.618506	0.497962	6	0.100433
RAB13	3.97405e-41	4.76724e-40	0.623189	0.448705	0.669565	13.3797	0.618498	0.489446	6	-0.00757385
ABHD14B	1.70601e-56	3.05602e-55	0.295786	0.563021	0.463478	15.7942	0.618443	0.496374	6	0.133863
BID	4.47319e-60	8.62367e-59	0.296623	0.661645	0.431304	16.306	0.618291	0.532442	6	0.255496
GNA15	7.86661e-60	1.50864e-58	0.278471	0.583915	0.434783	16.2715	0.618075	0.543762	4	-0.0858686
ERG28	2.13277e-47	3.00287e-46	0.404429	0.475927	0.556522	14.4133	0.618064	0.443183	6	-0.182518
ACBD3	2.31633e-53	3.80974e-52	0.31624	0.506164	0.485217	15.3326	0.617828	0.504428	6	0.118424
DNAJC19	6.99244e-45	9.25032e-44	0.421539	0.447016	0.590435	14.0077	0.61775	0.480319	6	-0.0328606
TCIRG1	1.00073e-45	1.34202e-44	0.489369	0.534776	0.555652	14.1451	0.61759	0.521379	2	5.55866e-06
GGCT	1.35137e-46	1.86861e-45	0.407523	0.490221	0.553043	14.2853	0.617505	0.504497	6	0.140687
LGALS7B	2.33724e-89	7.67107e-88	0.380523	1.13715	0.326957	20.0082	0.617395	0.566607	4	0.320551
HIGD2A	7.83693e-36	8.07981e-35	1.18572	0.408123	0.852174	12.4409	0.617295	0.513996	2	0.0272777
TSPAN14	4.57157e-50	6.82989e-49	0.36056	0.478559	0.513043	14.8317	0.617272	0.528156	4	-0.138839
EID1	8.05273e-36	8.29646e-35	1.21736	0.417988	0.85913	12.4387	0.617262	0.507614	2	0.00548356
AAMP	7.82454e-45	1.03129e-43	0.415586	0.425418	0.58	13.9997	0.617216	0.509804	6	0.0949024
MESD	7.26736e-43	9.18342e-42	0.4874	0.428527	0.614783	13.6739	0.617162	0.527831	6	0.185077
HEBP1	1.32469e-69	3.10953e-68	0.22448	0.679882	0.38087	17.5959	0.617159	0.512237	6	0.196349
BCL3	3.22257e-57	5.83682e-56	0.343107	0.506634	0.447826	15.8989	0.617106	0.496289	1	-0.864061
TMEM213	2.38727e-129	1.42373e-127	0.225507	1.37246	0.273043	24.1685	0.617098	0.557757	6	0.809813
SCP2	7.59995e-37	8.11491e-36	0.883497	0.406067	0.795652	12.6259	0.617094	0.496037	6	0.00516637
CRTAP	5.84974e-73	1.4848e-71	0.234554	0.783164	0.366087	18.0282	0.617055	0.539811	6	0.402227
PIGH	4.38151e-71	1.06075e-69	0.208916	0.698037	0.373043	17.7879	0.616939	0.529057	6	0.29844
GNG10	2.16635e-68	4.97379e-67	0.239245	0.688395	0.385217	17.4369	0.616909	0.548965	4	0.0427666
LYPD6B	1.09598e-48	1.58415e-47	0.364789	0.517956	0.52087	14.6169	0.616833	0.488696	2	-0.000229592
SLC26A2	1.84985e-78	5.13027e-77	0.254802	0.917164	0.347826	18.7155	0.616707	0.486671	6	0.136711
CAPNS1	1.85959e-36	1.96415e-35	0.912083	0.418879	0.805217	12.5553	0.61667	0.465927	6	-0.0975943
FAM120AOS	1.47742e-55	2.58039e-54	0.286552	0.557595	0.454783	15.6575	0.616662	0.529406	6	0.122062
IER3IP1	4.98977e-47	6.99188e-46	0.378225	0.46671	0.54087	14.3545	0.616652	0.45575	6	-0.088845
GOLGA7	5.1181e-51	7.86258e-50	0.306227	0.447488	0.494783	14.9779	0.616605	0.521221	6	0.166067
LPAR6	9.93057e-88	3.18103e-86	0.215349	0.866171	0.327826	19.8204	0.616557	0.553141	2	0.405883
ECHDC1	1.50842e-53	2.49212e-52	0.296339	0.542769	0.466957	15.3604	0.616516	0.546157	6	0.303563
APIP	8.24919e-50	1.22867e-48	0.357495	0.546964	0.5	14.792	0.616482	0.489154	6	0.0828533
SLC44A3	8.63862e-73	2.1889e-71	0.207997	0.682542	0.367826	18.0067	0.616419	0.525091	6	0.248826
SRSF8	2.96819e-51	4.5935e-50	0.323213	0.529715	0.485217	15.0141	0.616272	0.475986	6	0.00642183
HP1BP3	1.17158e-47	1.66231e-46	0.398516	0.469724	0.527826	14.4547	0.616259	0.532794	6	-0.05717
AIP	2.8277e-65	6.16423e-64	0.238833	0.59492	0.396522	17.0219	0.616256	0.573749	6	-0.00425077
GNPNAT1	1.11151e-85	3.3973e-84	0.196326	0.836036	0.328696	19.5815	0.616184	0.508603	6	0.164957
NOTCH3	3.98699e-91	1.33546e-89	0.183784	0.901367	0.316522	20.2101	0.616108	0.53308	6	0.385506
COX16	5.99088e-43	7.59656e-42	0.508383	0.499939	0.58	13.688	0.616059	0.482662	2	-0.0299697
FAM83D	1.78668e-118	9.10154e-117	0.188504	1.05507	0.281739	23.1112	0.616052	0.528871	6	0.3478
LMF2	2.58464e-58	4.78779e-57	0.268613	0.489245	0.431304	16.0562	0.616038	0.520361	6	-0.0148117
SZRD1	1.0855e-45	1.45304e-44	0.38441	0.468762	0.549565	14.1394	0.616035	0.495301	6	0.0584715
ATP2B1	1.64933e-58	3.07462e-57	0.281786	0.614645	0.427826	16.0841	0.615862	0.484255	6	0.0657891
SUMO3	1.55478e-46	2.14382e-45	0.376056	0.437295	0.538261	14.2755	0.615743	0.454817	6	-0.165515
GOLGA4	2.15961e-38	2.41124e-37	0.676772	0.417416	0.70087	12.9032	0.615693	0.493135	2	0.014852
PIM3	3.10404e-41	3.7358e-40	0.589196	0.33047	0.630435	13.398	0.615632	0.451252	1	-0.816227
GOLM1	6.05865e-37	6.4928e-36	0.83566	0.425116	0.749565	12.6437	0.615565	0.471327	2	-0.0721024
PKP3	1.66587e-46	2.29268e-45	0.437375	0.551729	0.52	14.2707	0.615559	0.545517	6	0.0763167
EMC10	5.71355e-40	6.66853e-39	0.517607	0.390249	0.653043	13.1801	0.615498	0.494913	6	0.0182328
GRHPR	3.08895e-46	4.21171e-45	0.375623	0.479891	0.536522	14.2276	0.615437	0.495157	6	0.0781136
ERLEC1	3.99847e-37	4.31018e-36	0.750334	0.419735	0.751304	12.6764	0.615337	0.428377	2	-0.195652
STK17B	9.40403e-58	1.72458e-56	0.286738	0.517643	0.433043	15.9759	0.615322	0.53096	6	-0.177656
CDK2AP1	5.35541e-56	9.50051e-55	0.289959	0.675598	0.429565	15.7219	0.615195	0.480258	6	0.0270609
HNRNPA1	9.93032e-34	9.61635e-33	1.65464	0.363402	0.902609	12.048	0.615184	0.509388	6	-0.033725
ATP5PB	8.35942e-36	8.60639e-35	0.847903	0.38702	0.794783	12.4357	0.615132	0.499334	6	0.0180934
R3HDM4	4.64154e-47	6.51014e-46	0.369847	0.441831	0.522609	14.3595	0.615061	0.535695	4	-0.0941918
FAM136A	1.74167e-49	2.57321e-48	0.321745	0.503867	0.487826	14.7416	0.615014	0.484181	6	-0.000615817
ILDR1	2.42555e-79	6.80407e-78	0.184743	0.73531	0.34	18.8235	0.614922	0.540071	6	0.380324
ARHGAP1	7.79269e-63	1.60346e-61	0.245821	0.700444	0.394783	16.6897	0.614919	0.522162	6	0.331947
S100A13	3.50598e-34	3.44747e-33	1.28574	0.391696	0.867826	12.1336	0.614785	0.500549	6	-0.0151702
SPTSSB	6.46972e-133	4.09126e-131	0.167719	1.1003	0.265217	24.5054	0.614752	0.577324	6	0.777366
MYOF	8.5882e-42	1.04911e-40	0.593241	0.474997	0.586087	13.4931	0.614626	0.461127	4	-0.376912
CHCHD7	2.14064e-44	2.80154e-43	0.385721	0.348082	0.556522	13.928	0.614623	0.527863	6	-0.0168015
CRYBG1	2.9503e-51	4.57062e-50	0.360408	0.594452	0.468696	15.0145	0.614605	0.543384	4	0.0294037
LTA4H	1.71913e-56	3.07578e-55	0.282926	0.516005	0.432174	15.7937	0.614542	0.538921	6	0.356293
KRT5	9.21343e-103	3.81837e-101	0.465922	1.38309	0.294783	21.4922	0.614534	0.542512	4	0.166391
SVIP	6.22388e-42	7.63466e-41	0.450461	0.424411	0.598261	13.5168	0.614497	0.469219	6	-0.0489182
SMIM15	8.52411e-46	1.14626e-44	0.380203	0.485879	0.531304	14.1564	0.614468	0.520807	6	0.202163
MCCC2	3.86644e-57	6.9944e-56	0.274582	0.646654	0.418261	15.8875	0.614378	0.498324	6	0.138444
MAFF	1.38859e-47	1.96641e-46	0.545199	0.544443	0.507826	14.4429	0.614222	0.48332	1	-0.602066
LTBR	5.84316e-49	8.50446e-48	0.345993	0.505533	0.485217	14.6597	0.614177	0.528977	6	0.0934096
TCIM	3.42854e-92	1.17799e-90	0.254111	0.96626	0.309565	20.3309	0.614147	0.548976	6	0.0920889
C3orf14	1.44561e-82	4.25875e-81	0.193012	0.831523	0.326087	19.2128	0.614122	0.526284	6	0.287856
TRABD	2.86607e-49	4.20061e-48	0.331172	0.468002	0.486957	14.7079	0.614103	0.523612	6	0.166611
SERPINB1	1.6364e-33	1.57324e-32	1.59874	0.487851	0.822609	12.0068	0.613973	0.552099	2	0.258593
RPL17	2.05779e-33	1.96677e-32	1.40841	0.389201	0.841739	11.9878	0.613663	0.504084	1	0.0259091
IL1R1	1.57373e-74	4.10822e-73	0.235846	0.882877	0.343478	18.2271	0.613661	0.507442	6	0.274593
PPA2	1.65607e-42	2.06781e-41	0.407631	0.398851	0.576522	13.6139	0.613574	0.490148	6	0.0360622
GMPPA	9.3892e-69	2.17957e-67	0.209837	0.668887	0.364348	17.4846	0.613574	0.531534	6	0.333957
PLK2	3.62686e-62	7.3494e-61	0.294366	0.462042	0.398261	16.5976	0.613562	0.472701	1	-1.09135
IFITM1	4.23457e-36	4.40918e-35	2.14047	0.540117	0.657391	12.49	0.61354	0.458843	4	-0.205445
STAP2	2.52461e-43	3.24331e-42	0.406819	0.405312	0.553913	13.7506	0.61346	0.565312	2	-0.213605
GGT6	4.08972e-56	7.28159e-55	0.265526	0.565386	0.426957	15.7389	0.613409	0.489987	2	-0.0709591
MRPL19	2.70944e-48	3.88565e-47	0.323926	0.495678	0.486087	14.5551	0.613363	0.504636	6	0.0894539
MIR22HG	3.16135e-51	4.88727e-50	0.337441	0.472496	0.466957	15.0099	0.613356	0.533219	4	-0.217202
ACP2	8.20004e-64	1.74352e-62	0.229201	0.638347	0.381739	16.8236	0.613353	0.516874	6	0.235572
ADAM9	1.78615e-42	2.22639e-41	0.479728	0.360997	0.575652	13.6083	0.613285	0.416082	4	-0.686058
UAP1	6.0803e-39	6.89367e-38	0.529453	0.438338	0.633913	13.0005	0.613221	0.487558	2	0.0173843
FBL	3.5913e-40	4.21167e-39	0.474607	0.394599	0.612174	13.2151	0.613202	0.452024	6	-0.116026
UCHL3	5.34019e-45	7.07732e-44	0.380119	0.456379	0.522609	14.0268	0.613152	0.516584	6	0.173369
CARD19	1.17026e-49	1.73247e-48	0.300827	0.442171	0.474783	14.7684	0.613046	0.50282	6	0.0868497
GNL3	9.29487e-46	1.24762e-44	0.384795	0.474793	0.510435	14.1503	0.612952	0.516186	6	0.0315396
EIF4G1	1.01465e-36	1.08025e-35	0.648909	0.393072	0.690435	12.6031	0.612914	0.521604	2	0.114933
SDF2L1	5.66865e-38	6.25769e-37	0.647045	0.452688	0.647826	12.8286	0.612837	0.450262	6	-0.0786282
SELENOK	1.42847e-34	1.41985e-33	0.869217	0.402405	0.775652	12.2069	0.612799	0.480485	6	-0.0437888
CAP1	2.53712e-36	2.66443e-35	0.681936	0.350699	0.72	12.5307	0.612776	0.45054	4	-0.376471
RPP21	9.49308e-55	1.6157e-53	0.275607	0.546258	0.425217	15.5387	0.612725	0.548167	2	-0.20713
KRT6B	1.33689e-127	7.72185e-126	0.263345	1.39676	0.261739	24.0016	0.612621	0.571102	6	0.793239
PRKAA2	2.34862e-57	4.26971e-56	0.263558	0.600437	0.410435	15.9187	0.612537	0.494378	6	0.139561
TMEM246	4.84997e-60	9.32555e-59	0.227363	0.585743	0.396522	16.3011	0.612517	0.516007	6	0.19103
CANT1	2.34773e-57	4.26971e-56	0.250458	0.630581	0.406957	15.9188	0.612465	0.479427	6	0.040813
SH3YL1	4.39466e-38	4.86964e-37	0.529471	0.433846	0.630435	12.8483	0.612148	0.528896	2	0.153277
ALDH3A2	9.82787e-43	1.23977e-41	0.432069	0.474186	0.542609	13.6519	0.612072	0.493384	2	0.0210593
SSFA2	1.44761e-40	1.71135e-39	0.472707	0.382365	0.581739	13.2833	0.611822	0.50263	4	-0.309532
SRD5A3	6.71657e-41	8.00477e-40	0.456069	0.437976	0.568696	13.3406	0.611764	0.505304	6	0.0875164
AHR	5.33331e-43	6.78033e-42	0.415249	0.415373	0.537391	13.6964	0.611713	0.533022	2	-0.456417
GLRX5	1.45232e-48	2.09715e-47	0.299048	0.473195	0.472174	14.5977	0.611713	0.444488	6	-0.146147
TMEM134	4.62364e-38	5.1195e-37	0.513859	0.386433	0.635652	12.8444	0.611708	0.468962	6	-0.0677464
LINC02185	6.14715e-151	4.79707e-149	0.165058	1.2515	0.243478	26.1416	0.611707	0.544692	6	0.588112
MRPS34	5.46106e-37	5.86096e-36	0.566808	0.365909	0.65913	12.6519	0.611616	0.506671	6	0.0376615
ABO	2.0972e-49	3.09226e-48	0.313285	0.515829	0.463478	14.7291	0.611427	0.46944	6	-0.0279069
HEBP2	2.47408e-33	2.36003e-32	1.00546	0.388321	0.806087	11.9726	0.611371	0.437035	6	-0.169978
RTL8C	6.95532e-59	1.30488e-57	0.238612	0.597039	0.393913	16.1375	0.611349	0.561449	4	0.177735
SOCS6	2.13405e-53	3.51388e-52	0.260197	0.542871	0.425217	15.3379	0.611139	0.498456	6	0.0998413
MIA3	1.03038e-45	1.38052e-44	0.326807	0.471644	0.495652	14.1431	0.611025	0.46332	2	-0.108017
YIPF3	6.13561e-35	6.18663e-34	0.640234	0.379355	0.72	12.2754	0.610922	0.471145	6	-0.0804967
AP3S1	1.16946e-44	1.53738e-43	0.332946	0.453575	0.506087	13.9711	0.610735	0.488671	6	0.0588356
UBE2I	4.02002e-37	4.33023e-36	0.559392	0.385654	0.630435	12.6759	0.61063	0.528933	4	-0.089844
MED16	1.69003e-53	2.78903e-52	0.260948	0.539791	0.41913	15.353	0.610628	0.523647	6	0.251576
SLC35C2	1.0291e-51	1.62693e-50	0.260499	0.484184	0.434783	15.0842	0.610615	0.481762	6	0.0282662
FKBP2	1.63798e-31	1.45113e-30	1.37825	0.380995	0.888696	11.6196	0.610594	0.447175	6	-0.112233
SNCA	7.97594e-143	5.51958e-141	0.156465	1.15937	0.244348	25.418	0.610376	0.587751	6	0.932184
PDLIM5	1.28903e-34	1.28474e-33	0.745354	0.324935	0.711304	12.2152	0.610218	0.419879	4	-0.553714
TOMM22	1.72043e-37	1.87941e-36	0.485081	0.367218	0.625217	12.7423	0.610172	0.48396	6	-0.0318227
NOP53	2.20813e-32	2.03873e-31	0.980629	0.397623	0.805217	11.7896	0.610162	0.450144	6	-0.116708
CREG1	2.88752e-51	4.4781e-50	0.282773	0.509508	0.433913	15.0159	0.610115	0.523402	2	0.172872
MKL2	2.69451e-52	4.31562e-51	0.302411	0.67782	0.41913	15.1724	0.610099	0.48023	6	0.104785
SLC38A1	1.22259e-61	2.45708e-60	0.226759	0.517493	0.376522	16.5245	0.610068	0.514803	4	-0.318286
NABP2	7.5554e-71	1.81714e-69	0.185335	0.696458	0.335652	17.7574	0.610041	0.523529	6	0.276939
ACER3	1.64974e-76	4.41668e-75	0.186928	0.764349	0.32087	18.4747	0.610039	0.536608	6	0.445438
GEMIN7	3.89554e-71	9.44653e-70	0.180676	0.644453	0.336522	17.7945	0.610003	0.533125	6	0.323842
TMEM183A	1.9773e-38	2.21274e-37	0.470559	0.4364	0.591304	12.91	0.609924	0.479074	6	-0.0287115
ARL4D	2.59316e-108	1.15989e-106	0.20459	1.15213	0.268696	22.0776	0.609907	0.551851	6	0.678044
FASN	1.57841e-61	3.16351e-60	0.248463	0.708472	0.366957	16.5091	0.609837	0.531587	6	0.304518
SLC39A1	4.68789e-52	7.45945e-51	0.251533	0.46877	0.426957	15.136	0.609804	0.567397	6	0.0337868
PRSS22	1.88603e-36	1.99064e-35	0.755797	0.450838	0.615652	12.5542	0.609798	0.476594	4	-0.370947
PRR15	8.93576e-34	8.67041e-33	0.855614	0.422861	0.741739	12.0567	0.609795	0.428349	2	-0.2
CLCF1	8.57343e-82	2.50559e-80	0.271783	0.969797	0.308696	19.1202	0.60978	0.538629	4	0.0535843
MKNK2	2.43346e-37	2.64063e-36	0.536812	0.376718	0.616522	12.7152	0.609739	0.51432	6	-0.287141
EIF3K	4.56714e-31	3.9554e-30	1.32868	0.361697	0.881739	11.5317	0.609659	0.514021	6	0.000850697
PAQR4	5.91827e-67	1.32763e-65	0.299814	0.839971	0.346957	17.2468	0.609613	0.424112	6	-0.393913
ARPC2	2.41112e-31	2.11691e-30	1.28736	0.375309	0.84	11.5865	0.609599	0.453412	4	-0.103098
IFI16	1.79398e-36	1.89758e-35	0.647917	0.368112	0.642609	12.5581	0.609516	0.466867	4	-0.364332
MTUS1	6.34205e-39	7.17933e-38	0.466058	0.422735	0.569565	12.9972	0.609272	0.494528	2	-0.0970094
CDC42SE1	4.3385e-44	5.65276e-43	0.339326	0.450398	0.493043	13.8775	0.609258	0.550882	2	0.0443147
SMARCB1	2.78734e-41	3.36016e-40	0.391904	0.457035	0.525217	13.406	0.609193	0.492174	6	0.0025152
NCOA7	4.04101e-36	4.21662e-35	0.788077	0.493168	0.617391	12.4937	0.609185	0.483298	6	0.0127129
ARAF	2.83787e-55	4.89817e-54	0.231357	0.507123	0.4	15.6159	0.609111	0.518532	6	0.0857788
WIPI1	3.77307e-40	4.41778e-39	0.41636	0.392515	0.553043	13.2113	0.609081	0.508646	6	0.0838231
UNC5B-AS1	2.24187e-49	3.30226e-48	0.419663	0.774408	0.425217	14.7246	0.609074	0.530836	6	0.0276716
HK2	1.05262e-71	2.59546e-70	0.204997	0.732433	0.330435	17.8677	0.609031	0.523687	4	-0.11516
NCDN	5.27775e-72	1.31237e-70	0.204404	0.819541	0.324348	17.9062	0.608876	0.508153	6	0.285513
POLR2K	3.26236e-33	3.10189e-32	0.694105	0.376317	0.734783	11.9496	0.608756	0.487005	6	-0.0166696
CISD2	2.71272e-40	3.19409e-39	0.394625	0.427606	0.542609	13.2362	0.608713	0.413304	6	-0.343516
MZT2B	3.4017e-32	3.09977e-31	0.872513	0.368568	0.786087	11.7532	0.608594	0.357629	6	-0.381997
FAM49B	7.17147e-45	9.46156e-44	0.339151	0.422476	0.481739	14.0059	0.60844	0.494744	4	-0.345091
AP1M2	1.16188e-37	1.27589e-36	0.445014	0.399051	0.585217	12.7729	0.608419	0.497156	2	0.0306188
VPS4A	1.00023e-58	1.86934e-57	0.211967	0.559014	0.373913	16.115	0.608375	0.550825	6	0.329296
RNF181	4.2179e-33	3.98204e-32	0.710088	0.34706	0.727826	11.9282	0.608337	0.4924	6	-0.0145023
TNFRSF21	1.5016e-35	1.53841e-34	0.597125	0.467343	0.618261	12.3888	0.608197	0.506272	6	0.121837
PLD3	1.71149e-36	1.81164e-35	0.483129	0.37248	0.616522	12.5618	0.60815	0.478302	2	-0.0641127
ETFRF1	5.53798e-56	9.81253e-55	0.225566	0.569518	0.386087	15.7198	0.608089	0.48171	6	0.00462915
FGFR3	2.53599e-130	1.53742e-128	0.166261	1.19312	0.244348	24.2609	0.607994	0.553435	6	0.730979
MRPS25	3.28889e-43	4.20307e-42	0.323923	0.451989	0.489565	13.7315	0.607974	0.502153	2	0.0838607
RNF10	7.85745e-38	8.6544e-37	0.421785	0.365146	0.572174	12.8033	0.607812	0.50373	6	-0.0547049
CDIPT	2.19239e-62	4.46729e-61	0.196644	0.617654	0.354783	16.6278	0.60778	0.519893	6	0.238663
GSTZ1	7.78708e-53	1.26516e-51	0.239702	0.513997	0.403478	15.2536	0.607766	0.486971	6	0.0458369
NOTCH2	2.88765e-57	5.23667e-56	0.234854	0.606781	0.377391	15.9058	0.607689	0.497413	6	0.135426
TGFBR2	1.74806e-45	2.33144e-44	0.316866	0.514636	0.457391	14.1058	0.607644	0.514281	6	0.200947
LRP10	4.77023e-32	4.32535e-31	0.807657	0.360678	0.748696	11.7246	0.607575	0.518347	2	0.0261802
EIF4E2	3.06732e-39	3.52118e-38	0.382537	0.410881	0.541739	13.0527	0.607561	0.500505	6	0.0919052
EIF3E	1.25196e-31	1.11453e-30	0.832493	0.363171	0.781739	11.6426	0.607541	0.482123	6	-0.0292177
SH3GLB1	4.0724e-33	3.84963e-32	0.660093	0.375875	0.693043	11.9311	0.607523	0.521076	6	0.101634
MED8	5.27093e-53	8.60176e-52	0.236928	0.522133	0.398261	15.2791	0.607356	0.52385	6	0.256109
IFITM3	1.82352e-29	1.4929e-28	2.81088	0.352846	0.88087	11.2099	0.607319	0.444829	2	-0.208619
ERBB3	1.84936e-34	1.83448e-33	0.595075	0.364077	0.656522	12.1858	0.607183	0.516352	6	-0.131725
KCNS3	1.50551e-107	6.57361e-106	0.141036	0.907932	0.26087	21.998	0.606979	0.578006	4	0.5111
HDAC1	6.98844e-40	8.15003e-39	0.351477	0.371205	0.532174	13.1649	0.606966	0.500315	6	0.09829
UBE2E3	7.64318e-37	8.15513e-36	0.432772	0.361201	0.589565	12.6255	0.606961	0.452511	6	-0.126183
BEND5	2.7452e-92	9.47642e-91	0.175177	0.989118	0.275652	20.3418	0.606953	0.516491	6	0.333278
PREB	2.51187e-65	5.48387e-64	0.193577	0.632605	0.338261	17.0288	0.606844	0.533333	6	0.332212
CDC37	1.01226e-31	9.03891e-31	0.795549	0.34551	0.733043	11.6607	0.606784	0.521278	1	-0.192091
SMPD1	3.98653e-79	1.11191e-77	0.163351	0.688883	0.302609	18.7971	0.606676	0.540158	6	0.292164
GYG1	2.0487e-55	3.55277e-54	0.232992	0.588654	0.378261	15.6366	0.606604	0.546491	6	0.255277
ST3GAL1	3.74257e-94	1.33594e-92	0.155805	0.875652	0.273913	20.5514	0.606473	0.547014	6	0.420768
RAB5C	2.03984e-35	2.08547e-34	0.45735	0.350699	0.614783	12.3643	0.606422	0.484629	6	-0.0223031
DNPEP	2.03379e-41	2.45983e-40	0.322708	0.427181	0.493913	13.4294	0.60642	0.521007	6	0.224059
DDT	1.09439e-30	9.36194e-30	0.861833	0.348655	0.783478	11.4562	0.606292	0.467578	6	-0.0989439
GABARAPL1	1.91661e-51	3.00092e-50	0.273242	0.537212	0.402609	15.0431	0.606245	0.478604	4	-0.469631
CLIC3	2.19408e-80	6.26252e-79	0.207301	0.755341	0.297391	18.9503	0.606123	0.540038	4	-0.170767
ZYX	1.73852e-51	2.72789e-50	0.316973	0.432918	0.413043	15.0495	0.60612	0.427112	4	-0.796795
G6PD	1.02243e-50	1.55441e-49	0.279923	0.618897	0.398261	14.9319	0.606095	0.52921	6	0.298083
DHRS3	2.42413e-34	2.39814e-33	0.544753	0.374218	0.632174	12.1637	0.606077	0.458374	2	-0.114042
GINM1	4.64848e-43	5.91482e-42	0.299905	0.452828	0.471304	13.7064	0.605955	0.519093	6	0.142803
RNF39	4.16747e-66	9.2358e-65	0.25985	0.744062	0.332174	17.1336	0.605917	0.499552	4	-0.347994
CCPG1	1.24367e-30	1.05957e-29	0.835481	0.35924	0.778261	11.4451	0.605883	0.505913	6	0.0404278
NDUFV1	4.55965e-32	4.13696e-31	0.656931	0.341615	0.704348	11.7284	0.605842	0.490226	2	-0.0152148
CDH3	2.48879e-85	7.59108e-84	0.163427	0.79857	0.286087	19.5404	0.605796	0.565241	4	0.271554
DHCR24	4.0725e-30	3.40249e-29	1.08192	0.386743	0.823478	11.3418	0.60579	0.393705	2	-0.284231
FBXO34	9.19747e-43	1.16124e-41	0.310621	0.48361	0.469565	13.6568	0.605784	0.521726	6	0.209017
MISP	1.45346e-32	1.34875e-31	0.687419	0.371338	0.667826	11.8248	0.605696	0.519251	4	-0.122639
IMP3	2.02491e-34	2.00726e-33	0.507033	0.375627	0.621739	12.1784	0.605684	0.48671	6	0.0107746
SMIM30	1.17178e-42	1.4731e-41	0.313319	0.426245	0.477391	13.6391	0.605671	0.444445	6	-0.157897
DNAJC21	1.00912e-46	1.40597e-45	0.280468	0.53901	0.428696	14.3056	0.605658	0.494101	6	0.12238
HLA-DMA	8.08365e-33	7.55865e-32	0.669648	0.352788	0.686957	11.8739	0.605599	0.400391	2	-0.347876
NECTIN2	8.10071e-35	8.13453e-34	0.551842	0.376433	0.603478	12.2529	0.60549	0.481013	4	-0.337756
TMEM214	5.23869e-59	9.85345e-58	0.210608	0.621257	0.354783	16.155	0.605465	0.523117	6	0.309192
LAMB2	5.43308e-61	1.07135e-59	0.222074	0.668106	0.345217	16.4343	0.605336	0.529835	6	0.393874
KYNU	2.81652e-71	6.88687e-70	0.195894	0.616397	0.316522	17.8127	0.605222	0.52842	4	-0.237316
KRT6A	1.82564e-67	4.12696e-66	0.630972	1.0867	0.321739	17.3146	0.605116	0.472086	4	-0.422384
TNKS1BP1	1.28113e-54	2.16537e-53	0.226535	0.532507	0.374783	15.5195	0.605034	0.51127	6	-0.0478033
ITPR3	1.59386e-47	2.25491e-46	0.286875	0.476927	0.421739	14.4334	0.604949	0.49248	6	-0.296466
KRTCAP3	6.86497e-33	6.44376e-32	0.564576	0.350317	0.653043	11.8876	0.604916	0.511965	6	0.0889722
DUSP2	2.0481e-86	6.35258e-85	0.314213	1.30983	0.276522	19.6675	0.604887	0.493669	6	0.350719
ARF6	1.20385e-30	1.02684e-29	0.815924	0.349938	0.737391	11.448	0.60485	0.481936	4	-0.205572
AKAP1	1.06911e-69	2.51764e-68	0.177034	0.722	0.312174	17.608	0.604705	0.527281	6	0.347955
MRPL27	4.96406e-32	4.49832e-31	0.585656	0.354917	0.676522	11.7212	0.604581	0.480295	6	-0.0403472
SND1	1.03845e-48	1.50397e-47	0.240295	0.491353	0.406087	14.6206	0.604496	0.492628	6	0.100658
FUCA2	1.12043e-47	1.59127e-46	0.246521	0.535215	0.411304	14.4577	0.604486	0.501404	2	0.0362141
TXNDC15	6.67939e-51	1.0197e-49	0.235319	0.54272	0.388696	14.9602	0.604425	0.517601	6	0.263012
EIF4EBP2	9.57585e-37	1.02098e-35	0.397307	0.383196	0.546957	12.6077	0.604414	0.438333	6	-0.204566
GUSB	2.38192e-43	3.06537e-42	0.294868	0.459514	0.451304	13.7548	0.604413	0.514298	2	0.148917
AP1G2	4.54554e-43	5.78886e-42	0.318791	0.496875	0.453913	13.708	0.604384	0.491448	2	0.0470623
TXNL1	7.84633e-32	7.03628e-31	0.605502	0.346572	0.667826	11.6823	0.604301	0.546563	6	0.207784
EIF4B	1.61829e-30	1.36762e-29	0.710579	0.358878	0.750435	11.4223	0.604278	0.445707	2	-0.142494
B3GNT2	1.1291e-42	1.42068e-41	0.297372	0.429296	0.46087	13.6418	0.604226	0.484858	2	-0.013364
RHEB	2.04264e-30	1.72227e-29	0.783502	0.324475	0.753913	11.402	0.604144	0.46411	4	-0.24779
FASTK	2.40027e-38	2.6779e-37	0.335926	0.348067	0.52087	12.895	0.604117	0.495518	2	0.0286554
NDUFB11	2.87099e-28	2.28666e-27	1.22508	0.326929	0.865217	10.9632	0.604091	0.525465	6	0.024344
MAT2A	6.90901e-36	7.13315e-35	0.431451	0.352028	0.56	12.451	0.604062	0.486402	6	-0.0243953
KIAA0319L	5.00489e-36	5.19284e-35	0.425779	0.410505	0.55913	12.4767	0.60404	0.431995	2	-0.23822
CRLS1	6.24908e-37	6.69199e-36	0.374319	0.413238	0.535652	12.6413	0.604	0.458214	6	-0.0779819
CRAT	5.01226e-84	1.50378e-82	0.149818	0.804581	0.27913	19.3865	0.603993	0.526882	6	0.259647
PXMP2	1.36746e-68	3.16435e-67	0.166405	0.666423	0.312174	17.4631	0.6039	0.48473	6	0.0287609
IGFBP4	1.23697e-59	2.36605e-58	0.257135	0.745554	0.34	16.2437	0.603886	0.552608	6	0.26313
MRPL4	2.25892e-35	2.30624e-34	0.425555	0.374154	0.562609	12.3561	0.603881	0.499966	6	0.0638652
SUSD4	5.24275e-82	1.53833e-80	0.158166	0.780286	0.282609	19.1458	0.603879	0.516241	6	0.270599
EIF3M	2.92404e-32	2.67614e-31	0.557353	0.350823	0.646957	11.7659	0.603779	0.526398	6	0.145843
DNAJB9	9.2389e-50	1.37051e-48	0.275311	0.623204	0.390435	14.7844	0.603642	0.491035	6	0.129519
PLEKHJ1	2.00604e-37	2.18814e-36	0.374482	0.377981	0.52	12.7303	0.603599	0.496326	6	-0.198854
TEX264	2.15127e-34	2.13108e-33	0.440138	0.350125	0.587826	12.1735	0.603556	0.469499	6	-0.0560874
C8orf82	4.91409e-89	1.59855e-87	0.14317	0.809099	0.269565	19.9711	0.603549	0.541592	6	0.452486
TMEM126A	4.72116e-41	5.65422e-40	0.298106	0.406178	0.473043	13.3669	0.603469	0.481072	6	0.0322393
TMEM184A	8.52544e-44	1.10785e-42	0.294562	0.395017	0.44	13.8289	0.60344	0.498499	6	-0.518358
GPCPD1	4.60121e-39	5.24509e-38	0.381021	0.393998	0.495652	13.0218	0.603436	0.511022	4	-0.318832
MPDU1	7.64299e-40	8.89923e-39	0.324185	0.349717	0.487826	13.1581	0.603423	0.495088	6	-0.150617
MMP7	1.40079e-82	4.14335e-81	0.268215	0.947811	0.28087	19.2145	0.603367	0.534559	4	-0.108984
CCNC	1.07712e-38	1.21184e-37	0.337231	0.345118	0.504348	12.9567	0.603243	0.528013	4	-0.184478
SDAD1	1.03791e-50	1.57469e-49	0.230552	0.521527	0.38087	14.9309	0.603237	0.532379	6	0.293838
AHCYL2	3.2452e-51	5.01161e-50	0.2439	0.631135	0.374783	15.0082	0.603196	0.513876	6	0.241684
FCGBP	5.85088e-76	1.54663e-74	0.353295	1.32635	0.285217	18.4063	0.603009	0.454886	6	-0.0145275
DNAJC3	1.31412e-30	1.117e-29	0.638981	0.36369	0.693043	11.4403	0.602946	0.444073	2	-0.155497
CSRNP1	8.8061e-46	1.1831e-44	0.329045	0.492278	0.41913	14.1541	0.6028	0.524349	4	-0.106215
FTSJ1	1.81503e-50	2.73392e-49	0.21472	0.484901	0.38	14.8935	0.60248	0.545006	6	-0.0267564
RAB38	1.09451e-92	3.7961e-91	0.145507	0.83013	0.261739	20.3868	0.602459	0.576739	6	0.576221
GIPC1	1.38099e-31	1.22716e-30	0.574188	0.331701	0.64087	11.6342	0.602385	0.513076	4	-0.159693
FOLR1	3.98393e-39	4.55204e-38	0.598502	0.784551	0.455652	13.0328	0.602309	0.434023	6	-0.165549
ZC3H15	2.88194e-31	2.51522e-30	0.564524	0.355375	0.646087	11.5712	0.602258	0.489311	6	0.00638026
TIMM9	2.37532e-49	3.49532e-48	0.215101	0.495379	0.385217	14.7207	0.602237	0.479955	6	-0.0065008
FBXO9	2.10434e-45	2.80407e-44	0.251275	0.475814	0.411304	14.0927	0.602117	0.497297	2	0.0567594
MAGEF1	4.81307e-36	5.00089e-35	0.369765	0.382027	0.530435	12.4798	0.602052	0.494031	2	0.00114013
COX20	6.16287e-32	5.55037e-31	0.52092	0.352389	0.621739	11.7028	0.601954	0.443625	6	-0.172661
COQ2	9.7979e-70	2.31101e-68	0.161866	0.686405	0.29913	17.613	0.601914	0.496706	6	0.0778146
RAB8A	1.22947e-37	1.34709e-36	0.344346	0.41366	0.497391	12.7685	0.601823	0.508913	2	0.0123534
SELENOF	1.27707e-28	1.02775e-27	0.771624	0.335762	0.770435	11.0363	0.601727	0.465967	6	-0.0869577
TKT	1.21241e-30	1.03354e-29	0.728661	0.456832	0.61913	11.4473	0.60166	0.557349	6	0.211407
LETM1	1.53858e-55	2.68081e-54	0.208246	0.600403	0.345217	15.6549	0.601645	0.52004	6	0.291018
EIF2AK3	4.11696e-58	7.56891e-57	0.206474	0.619395	0.335652	16.0273	0.601633	0.538701	6	0.325097
EGFR	6.92163e-43	8.75407e-42	0.295548	0.51231	0.426087	13.6775	0.601507	0.513018	6	0.0715042
B4GALT4	2.85864e-34	2.82229e-33	0.45229	0.41789	0.545217	12.1503	0.601457	0.513312	2	0.0278509
SYBU	1.96375e-42	2.44153e-41	0.285833	0.472482	0.433043	13.6014	0.601448	0.489683	2	-0.0241048
NOB1	7.98026e-56	1.41058e-54	0.190983	0.523214	0.343478	15.6966	0.601441	0.55853	6	0.107659
SERPINB13	2.65482e-94	9.52247e-93	0.23333	1.13877	0.254783	20.568	0.601401	0.556879	4	0.386519
CTDSP1	1.8399e-53	3.03293e-52	0.208168	0.564408	0.353043	15.3475	0.601344	0.520629	6	0.28053
UBE2K	1.28597e-34	1.28256e-33	0.397841	0.388677	0.54	12.2154	0.601246	0.492308	6	0.0797283
RHOG	3.4007e-46	4.63247e-45	0.233961	0.356476	0.408696	14.2209	0.601232	0.504163	4	-0.384576
CREB3L2	2.20892e-59	4.19781e-58	0.19528	0.654649	0.327826	16.2081	0.601216	0.498683	6	0.143211
VTI1B	8.73976e-32	7.81835e-31	0.493735	0.362716	0.614783	11.6732	0.601193	0.439579	6	-0.213014
GNAI1	6.46436e-47	9.04086e-46	0.247125	0.516887	0.389565	14.3366	0.600766	0.501501	6	0.0950874
DTX4	3.44546e-53	5.64785e-52	0.216621	0.661206	0.348696	15.3068	0.600668	0.481928	6	0.0614289
VWA1	3.07421e-59	5.81959e-58	0.190131	0.643967	0.326087	16.1878	0.600655	0.51248	6	0.255707
ICA1	1.18841e-44	1.56089e-43	0.242223	0.449278	0.406087	13.97	0.600603	0.503489	2	0.0104973
ANAPC13	5.86944e-32	5.29911e-31	0.452519	0.331028	0.595652	11.707	0.600551	0.468408	6	-0.0616371
RNPEPL1	5.621e-40	6.56574e-39	0.293356	0.388868	0.452174	13.1813	0.600469	0.497754	6	-0.0689279
CBR1	1.30547e-30	1.11029e-29	0.589582	0.357134	0.623478	11.4409	0.60016	0.413252	2	-0.365327
RAB5A	4.78288e-35	4.84931e-34	0.345509	0.336005	0.52	12.2956	0.600026	0.527067	6	-0.0718378

## Sheet: Cl04
geneID	pval	fdr	meanExp	logR	expT	rsZ	auc	subMinAuc	subMinIdx	maxLogR
ACTB	0	0	5.21815	0.738013	0.971347	39.3611	0.892648	0.854608	3	0.529564
S100A10	8.88423e-280	2.08691e-276	4.01304	1.18735	0.926457	35.7224	0.854239	0.795393	3	0.873017
ACTG1	1.80186e-264	2.30867e-261	4.40622	0.750659	0.96084	34.7225	0.84623	0.731953	3	0.323027
SH3BGRL3	5.96136e-266	8.40194e-263	2.94538	1.30733	0.892073	34.8205	0.843839	0.804403	3	0.914257
TMSB4X	4.39653e-253	4.76651e-250	4.2312	0.71091	0.973257	33.9596	0.838675	0.715494	3	0.238035
TMSB10	1.22605e-246	1.23428e-243	4.77198	0.57459	0.985673	33.5201	0.83439	0.719705	3	0.247338
KRT7	5.15471e-244	4.54066e-241	3.30933	1.37032	0.880611	33.3396	0.821004	0.653661	3	0.276356
TPM4	1.17418e-268	1.83876e-265	2.07662	1.99128	0.777459	34.9988	0.820327	0.747212	3	1.01777
LMO7	1.53782e-223	1.0837e-220	2.51917	1.31452	0.82808	31.8956	0.812879	0.775202	3	0.937494
TM4SF1	8.5603e-276	1.50811e-272	2.37337	2.03671	0.774594	35.4649	0.811967	0.696861	3	0.861097
SFN	1.87071e-289	6.59146e-286	2.17916	2.31265	0.744986	36.3403	0.811413	0.733676	3	1.2802
KRT17	0	0	3.12829	2.74592	0.708691	39.1675	0.810465	0.733879	3	1.46457
S100A2	2.03197e-278	4.09122e-275	3.47467	2.41171	0.752627	35.6347	0.805367	0.69305	3	1.10472
ANXA1	3.03031e-197	1.70837e-194	4.48158	0.605845	0.9532	29.9393	0.798634	0.767342	2	0.465382
GPRC5A	5.8936e-256	6.92204e-253	2.17041	2.1256	0.725883	34.1537	0.79638	0.680195	3	0.823088
MTRNR2L12	2.85064e-194	1.48803e-191	3.80088	1.16281	0.941738	29.71	0.782517	0.38118	1	-0.262023
SERPINB2	1.6047e-285	4.52332e-282	1.80284	2.56769	0.630372	36.0904	0.771151	0.707001	3	1.54634
EMP1	1.72147e-244	1.61749e-241	1.68973	2.30272	0.649475	33.3724	0.764716	0.67407	3	1.22144
TAOK1	2.55968e-153	8.38981e-151	2.85694	1.00197	0.9532	26.3501	0.757621	0.21361	1	-0.624491
MYL12A	9.49308e-143	2.67591e-140	2.60705	0.69365	0.850048	25.4112	0.752819	0.726475	5	0.616428
ALDH1A3	2.99844e-176	1.32063e-173	1.71803	1.98267	0.655205	28.2805	0.749173	0.67818	3	1.14117
CFL1	5.34952e-132	1.34636e-129	2.26243	0.669385	0.847182	24.4192	0.742304	0.647875	3	0.214019
MT-ND4L	2.3598e-130	5.83491e-128	4.3151	0.764306	0.972302	24.2639	0.74101	0.463749	2	-0.0335978
HMGA1	1.12763e-150	3.53175e-148	1.52139	1.65335	0.664756	26.1184	0.73636	0.648503	3	0.795317
YWHAZ	8.82927e-122	1.77771e-119	2.10552	0.689627	0.807068	23.4377	0.732022	0.675327	3	0.362908
SQSTM1	3.62885e-116	7.00616e-114	2.47539	0.710622	0.840497	22.8806	0.72704	0.187617	1	-0.743062
TACSTD2	1.5255e-110	2.65437e-108	3.24003	0.619714	0.86915	22.3086	0.721937	0.550551	3	0.0547161
DUSP5	4.90717e-165	1.86924e-162	1.29112	1.92896	0.588348	27.3535	0.720512	0.612818	3	0.849981
PPIA	4.8829e-109	8.09643e-107	2.56826	0.554804	0.858644	22.153	0.720434	0.602195	3	0.177257
C15orf48	1.37599e-156	4.61743e-154	1.65445	1.94811	0.601719	26.6339	0.720221	0.635006	3	1.06096
LAMB3	2.57024e-143	7.39285e-141	1.28363	1.69868	0.627507	25.4624	0.719935	0.639936	3	0.969764
F3	1.74744e-127	4.10474e-125	1.92055	1.44778	0.675263	23.9905	0.719486	0.552774	3	0.221834
PLS3	7.05084e-193	3.54909e-190	0.884539	2.25252	0.530086	29.602	0.719255	0.647623	3	1.3758
ITGB8	1.66017e-124	3.59977e-122	1.5324	1.54151	0.65043	23.7035	0.718193	0.628876	2	0.795046
SDCBP2	9.11355e-159	3.21116e-156	1.08871	1.9501	0.574021	26.8213	0.717106	0.625456	3	1.00896
MT-ATP8	1.1883e-113	2.17504e-111	2.99862	0.850503	0.923591	22.6265	0.716222	0.341898	2	-0.33247
HLA-E	5.44563e-101	8.16497e-99	2.27162	0.629351	0.813754	21.3019	0.711236	0.551905	2	0.00717798
IL1RN	3.33608e-165	1.30608e-162	1.11732	1.88506	0.555874	27.3676	0.709667	0.642334	3	1.22297
LRRC8A	3.26879e-150	1.00153e-147	1.05467	1.91156	0.558739	26.0776	0.709354	0.615692	3	0.938271
S100A16	7.60478e-126	1.7013e-123	1.54801	1.4556	0.634193	23.833	0.709046	0.515817	3	0.0816312
ANXA3	1.14191e-137	3.09501e-135	1.07337	1.76412	0.581662	24.9473	0.708453	0.664262	1	1.05156
IL32	1.10365e-222	7.40704e-220	1.05793	2.34292	0.489016	31.8338	0.707988	0.578337	1	0.424311
MIR4435-2HG	2.14804e-145	6.30718e-143	1.06596	1.87645	0.561605	25.6494	0.707531	0.654047	3	1.10579
GALNT5	1.00897e-163	3.74221e-161	0.97831	2.09227	0.528176	27.2429	0.706896	0.614865	3	1.0976
PLAUR	7.24524e-159	2.61832e-156	1.07724	1.95116	0.532951	26.8299	0.703134	0.644313	3	1.28229
IGLV3-19	0	0	1.954	3.95324	0.419293	38.5304	0.701455	0.696706	3	3.69598
CLDN4	2.4056e-90	2.97408e-88	2.88953	0.617235	0.82999	20.1212	0.700139	0.481273	1	-0.0493366
PHLDA2	6.33677e-115	1.1908e-112	1.40787	1.45065	0.613181	22.7554	0.699067	0.575457	3	0.451468
TNFRSF12A	2.02208e-109	3.47552e-107	1.39286	1.26749	0.640879	22.1927	0.69727	0.323086	1	-0.75802
MET	1.54818e-117	3.03056e-115	1.01002	1.58612	0.574976	23.0177	0.696901	0.599278	3	0.720033
PFN1	4.74961e-86	5.44236e-84	2.52669	0.467486	0.851003	19.6248	0.69534	0.607065	3	0.155472
MALL	9.25887e-134	2.41657e-131	1.00656	1.83991	0.533906	24.5845	0.694735	0.583123	3	0.727066
ISG20	7.91401e-88	9.37311e-86	1.91076	0.819746	0.762178	19.8318	0.693764	0.453394	1	-0.176322
FLNA	2.18303e-196	1.18337e-193	0.776279	2.23161	0.456543	29.8734	0.693458	0.676123	3	1.69707
SPNS2	3.46501e-185	1.684e-182	0.845499	2.32318	0.456543	28.9982	0.691872	0.645596	3	1.67235
RPS21	1.27437e-82	1.35045e-80	3.01296	0.364996	0.893983	19.2194	0.691609	0.539972	3	0.0129369
C1orf116	1.95271e-111	3.44018e-109	1.00285	1.59506	0.561605	22.4003	0.689985	0.618918	3	0.916659
TMBIM1	3.91125e-104	6.05771e-102	1.00409	1.51034	0.582617	21.6384	0.689927	0.623607	3	0.935619
S100A14	2.24125e-100	3.32507e-98	1.64639	1.24599	0.635148	21.2356	0.689699	0.465282	3	-0.128926
CXCL8	3.00038e-109	5.0342e-107	1.6153	1.54791	0.580707	22.1749	0.687498	0.538589	3	0.37332
PLAU	4.26507e-206	2.61356e-203	0.826577	2.29273	0.43362	30.6118	0.686853	0.631783	1	1.02521
CEACAM5	8.10624e-128	1.96982e-125	1.36664	1.75508	0.520535	24.0224	0.685456	0.539055	3	0.387275
HSPB1	6.73053e-78	6.40947e-76	2.70556	0.577229	0.835721	18.6466	0.68499	0.546843	3	0.0433459
ATP6V0C	7.82849e-97	1.11449e-94	1.24546	1.15214	0.630372	20.8487	0.684947	0.585615	1	0.410108
CEACAM6	4.38992e-87	5.15596e-85	1.97039	1.05791	0.685769	19.7454	0.684513	0.460902	3	-0.164727
JUP	1.15716e-92	1.5101e-90	1.11537	1.32067	0.602674	20.3841	0.68358	0.58803	3	0.555836
ISG15	2.60337e-77	2.42993e-75	2.98371	0.753036	0.829035	18.5741	0.681041	0.435504	1	-0.204279
EMP3	1.22919e-123	2.54767e-121	0.961423	1.65215	0.512894	23.619	0.68051	0.560456	1	0.232357
MT-ND6	1.15829e-75	1.03323e-73	2.23251	0.858846	0.791786	18.3692	0.678494	0.469041	2	-0.0806982
C19orf33	3.42914e-70	2.79366e-68	2.01286	0.623909	0.772684	17.6723	0.673901	0.497068	3	-0.0951405
RAB11FIP1	1.08091e-69	8.65588e-68	1.79925	0.673298	0.739255	17.6074	0.673367	0.578492	2	0.128044
MYL12B	1.02662e-67	7.90668e-66	2.55479	0.333808	0.858644	17.3477	0.672868	0.603712	5	0.205012
RND3	7.01253e-77	6.41784e-75	1.35863	1.06423	0.65425	18.5208	0.672674	0.542414	1	0.135224
IFITM1	1.05865e-73	9.09796e-72	2.48336	0.811247	0.776504	18.1225	0.670518	0.501755	2	0.011853
MACC1	2.78251e-76	2.49787e-74	1.20977	1.21422	0.606495	18.4465	0.668595	0.623937	2	0.945581
ADAM9	3.94471e-84	4.3435e-82	0.832714	1.34872	0.547278	19.3989	0.66715	0.583918	3	0.686058
ALDOA	8.41764e-74	7.27842e-72	1.46089	0.917576	0.670487	18.1351	0.667046	0.523873	3	0.138221
IFITM3	5.62273e-64	4.10605e-62	3.19799	0.585397	0.861509	16.8459	0.66693	0.497583	2	-0.028483
ACTN4	3.74804e-63	2.68147e-61	1.5665	0.681811	0.704871	16.7333	0.663859	0.5957	1	0.286351
FHL2	8.48232e-108	1.37414e-105	0.811334	1.84426	0.452722	22.024	0.663027	0.553699	3	0.79106
VDAC2	3.84083e-63	2.73397e-61	1.38047	0.846219	0.658071	16.7318	0.6617	0.594734	3	0.399894
SAMD9	3.27249e-73	2.77846e-71	1.116	1.16835	0.582617	18.0603	0.661452	0.576064	2	0.594587
ZYX	2.26405e-108	3.71042e-106	0.62438	1.62646	0.448902	22.0838	0.66118	0.572888	3	0.796795
FOSL1	5.56904e-142	1.53902e-139	0.615577	1.95853	0.400191	25.3415	0.661029	0.608879	3	1.30798
CCL2	2.2076e-119	4.38224e-117	1.18287	1.74273	0.445081	23.2013	0.660888	0.628939	1	1.23662
MAL2	1.38026e-61	9.21958e-60	1.46278	0.811995	0.655205	16.5172	0.659487	0.552881	3	0.153384
PNPLA2	2.07573e-69	1.65285e-67	0.977204	1.1013	0.585482	17.5704	0.658149	0.538439	3	0.293498
GAPDH	8.11285e-57	4.97141e-55	3.06923	0.37167	0.898758	15.841	0.657818	0.380535	3	-0.246211
PLSCR1	9.00464e-62	6.10151e-60	1.37657	0.859515	0.657116	16.5429	0.657734	0.542072	2	0.168089
ANKRD36C	6.73354e-77	6.20277e-75	1.03918	1.28246	0.541547	18.523	0.657704	0.588491	3	0.771861
NABP1	1.66441e-123	3.39974e-121	0.549866	1.74472	0.413563	23.6062	0.657702	0.62236	3	0.807249
CDKN1A	5.46745e-64	4.01345e-62	1.38972	0.985481	0.636103	16.8476	0.65737	0.432341	1	-0.278772
KRT15	1.21306e-92	1.56852e-90	0.945897	1.71789	0.463228	20.3818	0.656315	0.533252	3	0.543473
ERRFI1	1.27402e-82	1.35045e-80	0.88052	1.51032	0.489971	19.2194	0.65477	0.5963	6	1.1385
PDLIM5	6.16675e-62	4.21914e-60	1.14086	1.09697	0.595989	16.5657	0.654712	0.580121	3	0.553714
KRT23	1.53538e-65	1.14495e-63	1.48573	1.35393	0.554919	17.0576	0.653604	0.596157	2	0.623201
PRSS8	7.38817e-92	9.38099e-90	0.68127	1.6992	0.447947	20.2932	0.652904	0.523938	3	0.629789
GRAMD2B	3.93327e-61	2.60261e-59	1.21268	1.16426	0.578797	16.4539	0.652078	0.586315	6	0.78488
OAS1	3.30604e-62	2.28408e-60	1.23382	1.05443	0.600764	16.6032	0.651156	0.54533	3	0.342762
ADGRF1	2.83122e-62	1.97541e-60	1.18474	1.16064	0.571156	16.6125	0.651098	0.544514	2	0.439684
ITGA2	3.80946e-62	2.61905e-60	1.07564	1.18934	0.569245	16.5946	0.650518	0.551493	2	0.530385
FSTL3	1.42864e-179	6.49523e-177	0.417288	2.04405	0.334288	28.5494	0.649897	0.61953	3	1.63785
CYTOR	1.02899e-104	1.6295e-102	0.538663	1.62448	0.411652	21.6999	0.649491	0.599859	3	0.830128
DSG2	4.70659e-72	3.92513e-70	0.745939	1.31137	0.499522	17.9125	0.64901	0.578554	3	0.705276
IGFBP3	8.36596e-79	8.30351e-77	1.11952	1.40655	0.483286	18.7578	0.648997	0.507655	3	0.199612
ITGB1	1.57487e-55	9.44519e-54	1.14122	0.897566	0.630372	15.6534	0.648907	0.590368	6	0.585509
PMAIP1	7.09489e-78	6.7111e-76	0.842142	1.25769	0.496657	18.6438	0.648091	0.480314	1	-0.255093
SPRR1B	1.83593e-220	1.17616e-217	0.67442	2.68277	0.311366	31.6729	0.647423	0.629036	3	2.20735
PEA15	3.26847e-78	3.15519e-76	0.595408	1.39086	0.464183	18.6852	0.646705	0.5911	6	0.992058
CLEC2B	3.9225e-96	5.47363e-94	0.705341	1.69715	0.415473	20.7715	0.64668	0.573821	3	0.952644
RBMS1	1.53004e-59	9.802e-58	0.931126	1.11488	0.553964	16.2307	0.646074	0.587223	6	0.827754
LMTK3	2.39102e-78	2.32407e-76	0.802463	1.49563	0.455587	18.7018	0.645569	0.568052	3	0.592378
CD55	3.46263e-52	1.91381e-50	1.72938	0.723279	0.685769	15.1559	0.645493	0.431963	3	-0.262227
CEACAM1	1.31603e-125	2.89814e-123	0.466027	1.85078	0.361032	23.81	0.645253	0.597848	3	1.32779
JPT1	1.64002e-51	8.95908e-50	1.42229	0.778126	0.666667	15.0534	0.644991	0.572736	3	0.361255
CAV2	9.64323e-75	8.38961e-73	0.680119	1.40483	0.458453	18.2538	0.643804	0.498792	3	0.259049
KLK10	2.21657e-85	2.4794e-83	0.829204	1.83642	0.416428	19.5463	0.643117	0.52503	3	0.701989
EPS8L1	1.74643e-54	1.02134e-52	1.20323	1.12674	0.573066	15.4996	0.642472	0.523159	3	0.316919
EDN1	1.73843e-171	7.42467e-169	0.454073	2.03457	0.318052	27.8905	0.641938	0.615746	3	1.53237
PHLDA1	2.63517e-124	5.62729e-122	0.532175	1.93819	0.350525	23.684	0.64092	0.601173	3	1.45157
IL18	5.91574e-64	4.29776e-62	0.792591	1.28575	0.496657	16.8429	0.640914	0.573917	1	0.297807
SLC6A14	3.01035e-65	2.23305e-63	0.942298	1.32257	0.489971	17.0182	0.640849	0.47766	3	0.0958273
SCEL	1.18583e-123	2.49449e-121	0.526698	2.00603	0.344795	23.6205	0.640034	0.57829	3	1.29554
UPP1	3.67497e-112	6.55634e-110	0.525335	1.7326	0.361987	22.4746	0.639605	0.605416	3	0.948915
MYH9	4.54804e-51	2.46444e-49	1.06115	0.994813	0.590258	14.9858	0.639506	0.578818	6	0.731205
TIMP2	6.36573e-133	1.63125e-130	0.445371	1.86841	0.335244	24.5061	0.639155	0.614672	3	1.5877
IL1RL1	1.02993e-241	8.53875e-239	0.603482	2.72469	0.282713	33.1805	0.638495	0.633228	3	2.58671
MX1	1.78437e-48	9.01396e-47	1.5664	0.706026	0.667622	14.5837	0.636817	0.4817	2	-0.0762076
KLF6	3.50098e-44	1.5917e-42	1.86088	0.631271	0.713467	13.8928	0.63579	0.483492	1	-0.0477651
CRB3	1.74853e-57	1.08087e-55	0.686013	1.20571	0.488061	15.9372	0.634894	0.568337	3	0.716486
RHOD	5.56384e-55	3.29482e-53	0.830702	1.08867	0.52149	15.5729	0.634736	0.546504	1	0.140427
CXCL16	3.91227e-53	2.22337e-51	0.837564	1.07828	0.52531	15.2985	0.634298	0.540238	3	0.423724
IGHV4-34	3.909e-230	3.06075e-227	1.28511	3.64735	0.272206	32.3677	0.633138	0.631146	2	3.49916
CD44	4.75824e-59	2.99387e-57	0.791011	1.11475	0.487106	16.1609	0.632315	0.480278	3	0.0688415
CFL2	7.11292e-83	7.7115e-81	0.44677	1.5046	0.381089	19.2496	0.632247	0.587721	3	1.1456
FST	4.66091e-185	2.18969e-182	0.663364	2.68797	0.282713	28.988	0.632172	0.618669	3	2.43807
MXD1	1.31528e-76	1.18831e-74	0.603455	1.52623	0.401146	18.4869	0.632078	0.576561	1	0.447006
NME2	1.20612e-49	6.24964e-48	1.17332	0.802084	0.595989	14.7664	0.632069	0.45546	3	-0.177769
ABLIM3	1.72502e-126	3.98565e-124	0.350006	1.78513	0.313276	23.895	0.631608	0.586903	3	1.26157
RAP2B	7.27381e-75	6.36752e-73	0.535438	1.34941	0.405922	18.2692	0.631419	0.566906	1	0.231013
GADD45A	1.47153e-56	8.90118e-55	0.843964	1.22653	0.479465	15.8035	0.63117	0.523296	1	0.0245734
CAPN2	6.11373e-40	2.50485e-38	1.76069	0.383565	0.744031	13.175	0.630686	0.606235	3	0.277925
KRT6A	2.45917e-95	3.33265e-93	0.879605	1.74883	0.355301	20.6831	0.629968	0.527914	3	0.422384
PIM1	1.68701e-78	1.65116e-76	0.499387	1.41572	0.386819	18.7204	0.629865	0.581811	3	0.976374
METRNL	5.65617e-94	7.52057e-92	0.401997	1.53785	0.350525	20.5313	0.629808	0.574117	3	1.02942
VPS37B	4.76263e-50	2.49533e-48	0.754423	1.00742	0.531996	14.8289	0.629725	0.534059	3	0.400218
TJP1	4.2103e-48	2.11174e-46	0.800976	0.978108	0.536772	14.5249	0.629705	0.579157	2	0.398462
ADM	6.43667e-80	6.52651e-78	0.604543	1.42029	0.382999	18.8936	0.629133	0.524712	1	0.029
SLC3A2	7.63686e-48	3.78992e-46	0.98097	0.891691	0.553964	14.4841	0.629086	0.216999	1	-1.32787
FAM129B	7.07587e-45	3.30223e-43	1.02747	1.12775	0.547278	14.0069	0.628351	0.56092	6	0.729658
MYOF	1.50594e-48	7.6348e-47	0.800215	0.994715	0.526266	14.5952	0.628335	0.538873	3	0.376912
IGLC3	2.41664e-225	1.79264e-222	1.01523	3.40267	0.260745	32.0254	0.628135	0.626021	3	3.28137
MYO6	3.23688e-43	1.44827e-41	0.952844	0.882476	0.590258	13.7326	0.628117	0.563185	2	0.547354
IRF7	1.35666e-45	6.45972e-44	1.06426	0.83853	0.578797	14.1237	0.628037	0.402425	1	-0.515485
GDF15	2.84449e-46	1.37295e-44	1.41228	1.01568	0.549188	14.2334	0.627712	0.32642	1	-0.806897
FGFBP1	1.1134e-61	7.47252e-60	1.03838	1.13427	0.451767	16.5301	0.627448	0.444734	3	-0.250998
F2RL1	1.01391e-68	7.8517e-67	0.480587	1.33764	0.398281	17.4802	0.627251	0.572947	3	0.852845
ARNTL2	4.4187e-83	4.82768e-81	0.40363	1.4635	0.358166	19.2742	0.627135	0.553077	6	0.808474
ANKLE2	2.23932e-49	1.14767e-47	0.71089	1.09462	0.505253	14.7246	0.627031	0.557939	6	0.503185
CAP1	1.42996e-42	6.25898e-41	0.91508	0.860649	0.573066	13.6246	0.62692	0.54946	3	0.376471
SOX4	2.14809e-42	9.31545e-41	1.55643	0.98062	0.595989	13.5949	0.626884	0.311061	1	-0.757798
IFI27	2.05545e-37	7.87214e-36	3.97315	0.346652	0.936963	12.7284	0.626867	0.387773	2	-0.169891
IGHG1	1.123e-199	6.59483e-197	1.05843	3.35313	0.262655	30.1255	0.626286	0.621496	3	3.2694
RNF213	5.24706e-40	2.15604e-38	1.35484	0.718854	0.640879	13.1865	0.625723	0.478319	1	-0.14008
ARPC2	5.93401e-38	2.30397e-36	1.39014	0.502748	0.680993	12.8251	0.625567	0.546588	3	0.103098
BST2	2.10097e-40	8.73482e-39	1.4109	0.660656	0.64852	13.2553	0.625472	0.487085	3	-0.0488617
SPHK1	5.68683e-104	8.71198e-102	0.367249	1.57452	0.318052	21.6211	0.624918	0.59406	3	0.861959
GLUD1	4.00652e-43	1.78696e-41	0.899013	0.923818	0.555874	13.7172	0.624486	0.512786	3	0.2407
FXYD5	1.9589e-56	1.17986e-54	0.619468	1.26131	0.43744	15.7855	0.624298	0.556472	2	0.793831
LY6E	6.46183e-37	2.44164e-35	2.10859	0.446965	0.767908	12.6387	0.624288	0.333965	3	-0.446562
IFI6	6.49789e-37	2.4487e-35	2.72637	0.522274	0.82235	12.6382	0.623913	0.361088	2	-0.297593
SPINT1	4.55715e-41	1.92878e-39	0.982021	0.860227	0.567335	13.3695	0.623435	0.487733	3	0.0512327
AL138963.3	3.47977e-75	3.06524e-73	0.631568	1.61673	0.357211	18.3094	0.621894	0.56601	3	0.953232
TUBA1C	1.32469e-44	6.10138e-43	0.831454	1.05857	0.507163	13.9622	0.62171	0.49905	3	0.232507
TAP1	6.42981e-41	2.71322e-39	0.931167	0.904392	0.550143	13.3439	0.621317	0.524504	2	0.344217
SNX9	4.01161e-55	2.38564e-53	0.517936	1.22273	0.423114	15.5938	0.621132	0.572893	2	0.922634
CAPG	1.70674e-45	8.07207e-44	0.757914	1.03178	0.489971	14.1075	0.620873	0.50317	3	0.241376
CYR61	4.1164e-53	2.32998e-51	0.787469	1.17292	0.442216	15.2952	0.620466	0.538131	6	0.604708
GBP1	3.70629e-40	1.53186e-38	1.10652	0.881151	0.556829	13.2127	0.620188	0.462025	2	-0.0393258
RSAD2	1.753e-41	7.53257e-40	1.1951	0.946598	0.541547	13.4404	0.620152	0.489615	2	0.217669
MTRNR2L8	2.21059e-45	1.04201e-43	0.928495	0.935501	0.516714	14.0893	0.620054	0.4198	1	-0.675188
LURAP1L	6.329e-69	4.95561e-67	0.456328	1.4216	0.361032	17.5071	0.619656	0.537679	3	0.71296
TICAM1	1.92165e-62	1.34745e-60	0.465957	1.23886	0.384909	16.6357	0.619057	0.582283	3	0.393688
OAS3	1.28301e-44	5.92877e-43	0.759813	0.951625	0.494747	13.9645	0.61903	0.529211	2	0.39348
DKK1	4.31494e-116	8.21821e-114	0.478906	1.94787	0.282713	22.873	0.618372	0.5873	3	1.50849
RAB5IF	2.02121e-37	7.76209e-36	0.969716	0.803481	0.570201	12.7297	0.618201	0.475893	3	-0.0206163
ARF4	2.04295e-34	7.19835e-33	1.19821	0.611162	0.639924	12.1777	0.617671	0.51181	3	0.0504534
OSMR	3.36452e-81	3.51256e-79	0.336939	1.429	0.322827	19.0487	0.617626	0.585776	3	1.17946
SDC1	9.43882e-47	4.61912e-45	0.644112	1.12462	0.455587	14.3103	0.617211	0.444242	3	-0.0103756
OCLN	1.07362e-40	4.49007e-39	0.751607	0.992621	0.501433	13.3056	0.617059	0.546309	2	0.558469
ST14	8.80448e-34	3.02659e-32	1.28627	0.62907	0.634193	12.058	0.616673	0.550327	3	0.259261
DDX60L	5.32047e-51	2.86209e-49	0.611077	1.12114	0.425979	14.9753	0.616475	0.549495	2	0.653622
SERINC2	2.05765e-38	8.12338e-37	0.844372	0.896129	0.536772	12.9069	0.616451	0.458865	3	-0.0226162
IFI16	2.86679e-38	1.12862e-36	0.862783	0.861594	0.543457	12.8813	0.616273	0.528397	2	0.332954
VCL	4.83876e-50	2.52583e-48	0.547912	1.13246	0.425024	14.8279	0.616221	0.519353	3	0.444869
ANXA5	6.28874e-33	2.11032e-31	1.36602	0.633335	0.657116	11.8949	0.616147	0.575736	2	0.434518
KRT13	1.04784e-86	1.22051e-84	0.859123	1.7828	0.313276	19.7014	0.615943	0.530021	3	0.497339
CORO1C	3.13898e-62	2.17935e-60	0.426444	1.32734	0.361987	16.6063	0.615506	0.555649	3	0.87498
GLIPR1	1.51295e-114	2.80573e-112	0.37549	1.8031	0.274117	22.7172	0.615402	0.597017	3	1.55538
SPRR1A	5.40665e-171	2.24121e-168	0.370804	2.09257	0.243553	27.8499	0.615235	0.600853	3	1.8145
GBP2	5.20016e-69	4.09447e-67	0.422496	1.38008	0.340019	17.5182	0.614614	0.5756	2	0.981294
PMEPA1	1.58603e-85	1.78828e-83	0.29702	1.41017	0.303725	19.5634	0.614558	0.549102	3	0.725041
POLD4	8.69122e-43	3.82794e-41	0.652156	0.938627	0.479465	13.6609	0.614437	0.427294	3	-0.190186
CYP1B1	6.97045e-158	2.39613e-155	0.510806	2.32269	0.245463	26.7455	0.614172	0.607168	3	2.13207
MSN	1.08029e-76	9.82295e-75	0.419345	1.49698	0.319007	18.4976	0.614099	0.579412	2	1.17337
SLC38A2	6.87739e-41	2.89343e-39	0.740767	0.900274	0.497612	13.3389	0.614031	0.498174	3	-0.144704
ASPH	1.01673e-36	3.80101e-35	0.796439	0.853216	0.533906	12.603	0.613887	0.482522	3	0.0775211
ASS1	3.5962e-39	1.43991e-37	1.06643	0.879315	0.51958	13.0406	0.613822	0.378505	3	-0.445891
PABPC1	9.64762e-31	3.00162e-29	1.70747	0.344404	0.739255	11.4671	0.613299	0.449309	3	-0.208808
PSMA6	3.33113e-38	1.30777e-36	0.759837	0.837568	0.518625	12.8697	0.612837	0.474754	2	0.0752573
ADIRF	2.93637e-42	1.26948e-40	0.939313	1.20517	0.451767	13.572	0.612241	0.431474	3	-0.0178662
NDRG1	1.37365e-81	1.44479e-79	0.334377	1.40784	0.30277	19.0956	0.612168	0.57683	3	1.05767
MAP7D1	1.55574e-53	8.98632e-52	0.43493	1.21203	0.377268	15.3584	0.611877	0.564146	3	0.896216
ADGRF4	2.53338e-126	5.75894e-124	0.291394	1.6245	0.255014	23.879	0.611765	0.5985	6	1.14858
TMOD3	3.277e-34	1.14322e-32	0.857663	0.841183	0.542502	12.1391	0.61155	0.543148	3	0.401883
GABARAPL1	7.268e-53	4.09741e-51	0.416848	1.20546	0.378223	15.2581	0.611541	0.521396	3	0.469631
WDR1	2.05276e-31	6.59036e-30	1.04357	0.648825	0.606495	11.6003	0.611055	0.5459	2	0.301989
MYADM	1.58181e-37	6.09125e-36	0.795921	0.940309	0.500478	12.7489	0.611037	0.504431	6	0.252216
RPS4Y1	1.3729e-51	7.55845e-50	0.690905	0.968617	0.401146	15.0651	0.610724	0.513512	2	0.208704
NLRC5	1.38456e-52	7.74362e-51	0.448555	1.18055	0.376313	15.216	0.610516	0.547476	2	0.668862
BCL10	6.56285e-50	3.41317e-48	0.450046	1.16966	0.386819	14.8074	0.610371	0.561765	3	0.796674
SBDS	2.39749e-35	8.64199e-34	0.72982	0.865766	0.507163	12.3513	0.610173	0.51872	3	0.285204
TMPRSS11D	1.86527e-113	3.3704e-111	0.313054	1.75289	0.255014	22.6066	0.609571	0.577865	3	1.35827
WASL	2.20932e-34	7.76513e-33	0.758351	0.88717	0.514804	12.1713	0.609414	0.533206	2	0.485842
MPRIP	2.27353e-41	9.71003e-40	0.558697	1.07191	0.43744	13.4211	0.609211	0.536401	2	0.6562
IDO1	9.22811e-62	6.22302e-60	0.613649	1.60237	0.330468	16.5414	0.609158	0.545118	3	1.03879
CD99	1.66003e-31	5.36616e-30	0.961122	0.737252	0.577841	11.6185	0.609007	0.516176	2	0.214719
CDKN2B	8.5554e-81	8.86616e-79	0.411866	1.56711	0.290353	18.9998	0.60862	0.517663	1	-0.0749179
PRSS22	2.85219e-33	9.68646e-32	1.00672	0.959837	0.52531	11.9608	0.608275	0.523406	3	0.370947
AREG	1.63588e-52	9.11308e-51	0.633878	1.34709	0.364852	15.2051	0.608177	0.553502	6	0.674258
GJB3	1.3915e-62	9.8059e-61	0.377801	1.32111	0.324737	16.655	0.608162	0.524471	3	0.536005
GADD45B	2.51298e-32	8.33365e-31	1.10646	0.670826	0.579752	11.7787	0.607986	0.239429	1	-1.19348
MX2	6.05251e-35	2.15414e-33	0.97689	0.773878	0.522445	12.2766	0.607859	0.479719	2	0.0479711
INF2	2.61182e-71	2.15269e-69	0.293118	1.20512	0.305635	17.8169	0.607647	0.568809	3	0.473964
GLRX	1.6869e-31	5.44054e-30	1.07974	0.809591	0.558739	11.6171	0.607538	0.484714	3	0.0818774
CLDN1	3.79281e-36	1.39208e-34	0.835372	1.09028	0.469914	12.4987	0.607411	0.530937	2	0.637086
KLF5	1.76649e-28	5.00943e-27	1.47064	0.543258	0.662846	11.0071	0.607207	0.493939	1	-0.0422501
MCL1	2.19559e-29	6.51467e-28	1.10307	0.601899	0.625597	11.1934	0.606991	0.509216	3	0.0931261
AKIRIN2	2.46693e-48	1.24175e-46	0.405363	1.08776	0.379179	14.5615	0.60699	0.565644	3	0.768601
RHOF	1.34278e-91	1.68974e-89	0.32066	1.53384	0.268386	20.2638	0.606924	0.591543	6	1.42395
ATF4	2.60081e-29	7.68466e-28	1.0797	0.661596	0.604585	11.1784	0.606297	0.40801	1	-0.482453
TFPI2	5.60289e-77	5.1952e-75	0.407975	1.71931	0.280802	18.5329	0.605523	0.551697	3	1.07435
COTL1	4.30717e-60	2.78464e-58	0.450777	1.41335	0.319962	16.3083	0.605411	0.571389	3	1.1677
RHEB	6.82465e-29	1.97508e-27	0.949059	0.650082	0.573066	11.0925	0.604868	0.510044	6	0.150362
HSP90B1	3.57167e-26	9.28766e-25	2.05953	0.434779	0.773639	10.5179	0.604439	0.566807	6	0.239174
AL355312.4	3.92903e-78	3.76705e-76	0.31635	1.49834	0.274117	18.6753	0.604063	0.548392	3	0.86973
RPL36A	3.06993e-26	7.99772e-25	1.632	0.375191	0.733524	10.5322	0.603987	0.455303	3	-0.173281
PPL	6.98337e-31	2.18234e-29	0.875312	0.829875	0.531996	11.4951	0.603678	0.491816	1	-0.194369
EIF6	9.17144e-28	2.52465e-26	0.997519	0.655247	0.597899	10.8576	0.603487	0.547707	3	0.34003
PPP1R14B	1.43011e-38	5.69378e-37	0.519776	1.03776	0.410697	12.9349	0.602745	0.468559	3	0.112381
SPINK1	2.51949e-151	8.07039e-149	0.358262	2.02831	0.21681	26.1756	0.602371	0.595111	3	1.88806
PLEC	1.55916e-26	4.12284e-25	1.20377	0.598277	0.638013	10.5957	0.602261	0.513513	2	0.18188
ZFAS1	2.7502e-26	7.21812e-25	1.3263	0.507478	0.632283	10.5425	0.602126	0.277879	1	-0.882996
RIOK3	2.50029e-31	8.00887e-30	0.677697	0.860124	0.498567	11.5834	0.602086	0.536808	2	0.556401
PHLDA3	7.83843e-46	3.74491e-44	0.430337	1.08961	0.359121	14.1623	0.601703	0.545127	3	0.0212003
MDFI	1.39554e-75	1.23703e-73	0.258473	1.36227	0.269341	18.3591	0.601638	0.530918	3	0.660716
TMEM165	1.11856e-27	3.06712e-26	0.898858	0.725338	0.559694	10.8395	0.601167	0.489345	3	0.100116
CDC42EP1	2.46018e-63	1.77814e-61	0.296418	1.24127	0.293219	16.7584	0.601134	0.548843	3	0.788416
THBS1	8.82921e-96	1.20814e-93	0.343389	1.54737	0.246418	20.7324	0.600995	0.55417	1	0.363605
PPA1	1.28865e-26	3.42038e-25	1.02393	0.646932	0.577841	10.6136	0.600506	0.465623	3	-0.0842934
MAFF	6.25419e-35	2.22032e-33	0.638857	0.801435	0.449857	12.2739	0.600471	0.479272	1	-0.406514
DENND2C	8.43468e-43	3.7266e-41	0.473742	1.18176	0.365807	13.6631	0.60042	0.529145	2	0.678915
CNN2	2.89071e-31	9.17604e-30	0.633521	0.87328	0.472779	11.571	0.600067	0.491414	3	0.188322

## Sheet: Cl05
geneID	pval	fdr	meanExp	logR	expT	rsZ	auc	subMinAuc	subMinIdx	maxLogR
TMEM190	0	0	4.1955	2.10398	0.924121	49.9382	0.909901	0.821689	6	0.827722
CETN2	0	0	3.06177	1.80878	0.918569	47.6206	0.899164	0.778186	2	0.418693
TPPP3	0	0	4.0438	1.44221	0.965453	46.7153	0.897245	0.727201	6	0.262378
TUBB4B	0	0	4.69895	1.06193	0.995065	45.2458	0.89021	0.588441	2	0.0850293
C9orf24	0	0	3.89247	1.49475	0.964837	45.9543	0.886255	0.671596	2	0.135379
TUBA1A	0	0	3.78557	1.57596	0.964837	45.4628	0.884588	0.610532	2	0.131718
C1orf194	0	0	3.59288	1.54904	0.940777	45.9852	0.883724	0.692589	2	0.147383
FAM183A	0	0	3.4414	1.51329	0.950648	45.7883	0.883226	0.676326	1	0.241873
DYNLL1	0	0	4.26887	0.883424	0.977791	44.1837	0.881127	0.680636	2	0.123741
CAPSL	0	0	2.67576	1.8751	0.882788	46.0664	0.874549	0.712806	2	0.334885
PIFO	0	0	3.00372	1.61268	0.923504	45.0624	0.873404	0.644753	2	0.122481
PRDX5	0	0	4.70105	0.820951	0.974707	43.0055	0.871083	0.700606	1	0.143415
HSP90AA1	0	0	5.10797	0.687444	0.996299	42.6915	0.868466	0.555678	2	0.0350057
AGR3	0	0	3.34343	1.29801	0.915484	42.9791	0.867143	0.774602	2	0.434582
CAPS	0	0	4.42496	1.17518	0.983344	42.4544	0.864462	0.577924	1	0.073403
CALM2	0	0	4.00777	0.732766	0.969155	42.2093	0.864211	0.774251	2	0.308322
C20orf85	0	0	3.92298	1.40074	0.968538	41.9209	0.851213	0.50138	2	-0.0273592
TSPAN19	0	0	2.32428	1.83617	0.845157	43.4716	0.850377	0.669997	2	0.24114
ATP5IF1	0	0	3.55981	0.961141	0.955583	40.3036	0.847308	0.606104	2	0.0743073
MORN2	0	0	2.89718	1.43909	0.909932	40.9653	0.844523	0.571724	2	0.0242491
RSPH1	0	0	3.19531	1.35749	0.951882	40.802	0.842509	0.515402	2	-0.0295468
LRRIQ1	0	0	2.49895	1.5364	0.913634	41.4156	0.842489	0.57785	2	0.0794137
CRIP1	0	0	2.88749	1.29796	0.903146	39.8443	0.840056	0.700228	6	0.422186
C2orf40	0	0	2.85038	1.7287	0.874769	41.8781	0.838724	0.552012	2	0.054637
GSTA1	0	0	3.62668	1.10685	0.929056	38.7185	0.830252	0.632147	2	0.177308
HMGN3	2.96439e-323	1.12301e-320	2.86814	0.970926	0.910549	38.4189	0.830021	0.618483	2	0.0832144
WDR54	0	0	2.00667	1.68009	0.822949	40.3693	0.827603	0.660822	2	0.256654
MS4A8	0	0	2.50084	1.27342	0.895126	38.7958	0.827568	0.658396	2	0.176758
C11orf88	0	0	2.50328	1.5794	0.867983	39.9753	0.826177	0.55685	2	0.0424035
MORN5	0	0	2.10674	1.78051	0.807526	40.7069	0.825054	0.650769	2	0.26259
C9orf116	0	0	2.68752	1.39069	0.88649	39.0023	0.823929	0.594264	2	0.0433493
CES1	0	0	2.48656	1.46241	0.880938	38.6161	0.821892	0.50651	2	-0.0445787
FAM92B	0	0	2.1634	1.58386	0.850093	39.76	0.821722	0.546202	2	-0.010853
DNAAF1	0	0	2.57283	1.44067	0.901295	38.8088	0.819642	0.515372	2	-0.0351072
MT-ND2	2.20531e-299	6.76399e-297	5.95407	0.416073	0.950648	36.9636	0.819055	0.724161	2	0.165736
CKB	5.38275e-305	1.82475e-302	2.68008	1.18232	0.889574	37.3113	0.818348	0.67048	2	0.251189
GSTP1	1.98608e-287	5.81471e-285	5.14667	0.358935	0.992597	36.2118	0.812567	0.726638	6	0.155022
SNTN	7.21336e-322	2.65491e-319	2.50656	1.49419	0.880938	38.3377	0.812452	0.424626	2	-0.173724
EFHC1	4.14028e-311	1.44149e-308	2.33474	1.40832	0.882788	37.6865	0.812034	0.512773	2	-0.0498886
PSENEN	1.43772e-293	4.30715e-291	2.54631	1.25135	0.861814	36.5999	0.811512	0.670635	2	0.216101
SMIM22	3.66574e-284	1.04938e-281	2.74566	0.885872	0.906848	36.0037	0.809486	0.608623	2	0.0719709
MRPS31	2.24298e-302	7.04734e-300	2.20895	1.47408	0.834053	37.1494	0.808199	0.591875	2	0.0638787
DYNLRB2	1.80647e-303	5.81774e-301	2.42427	1.3987	0.867366	37.2171	0.806358	0.519303	2	-0.0595037
TSTD1	3.94303e-276	9.76809e-274	2.44777	0.984306	0.857495	35.4867	0.804405	0.675475	2	0.218515
NME5	8.10783e-316	2.90125e-313	1.7068	1.73864	0.763726	37.9728	0.802086	0.620859	2	0.220492
TCTEX1D2	2.42911e-304	8.02353e-302	1.7469	1.70402	0.770512	37.2709	0.800774	0.673242	6	0.496961
CIB1	1.62228e-261	3.73182e-259	2.89521	0.746654	0.920419	34.5262	0.797461	0.564778	2	3.0837e-05
UBB	2.58695e-258	5.64832e-256	3.53164	0.567033	0.938927	34.3121	0.796054	0.64359	2	0.0961588
CD59	2.45894e-253	4.94938e-251	2.64444	0.878394	0.888341	33.9767	0.792069	0.584019	2	0.0240804
CCDC78	1.31762e-277	3.39472e-275	2.38484	1.33525	0.877236	35.5823	0.79187	0.441481	2	-0.16092
CCDC17	5.73117e-277	1.44763e-274	2.07095	1.41086	0.850093	35.541	0.789445	0.420781	2	-0.211636
DNAH5	8.08124e-278	2.12454e-275	2.01383	1.49154	0.826033	35.596	0.788416	0.43008	2	-0.185059
UFC1	5.15314e-247	9.76216e-245	2.52528	0.947312	0.872918	33.546	0.787889	0.558803	2	-0.00775252
RSPH9	1.14565e-281	3.14004e-279	1.76147	1.54431	0.777298	35.8439	0.786641	0.595231	2	0.142919
ERICH3	4.12709e-282	1.15577e-279	1.76876	1.56352	0.787168	35.8723	0.783527	0.440789	2	-0.208388
C11orf97	1.42091e-281	3.81336e-279	1.65852	1.6384	0.743985	35.8379	0.781337	0.560239	2	0.0520516
FAM229B	9.37315e-260	2.08181e-257	1.89866	1.42	0.794571	34.4086	0.781197	0.532417	2	-0.0458349
NUDC	5.89097e-236	1.01183e-233	2.3346	0.991998	0.864898	32.7789	0.780441	0.59724	2	0.0488278
IGFBP7	8.97923e-251	1.77955e-248	2.70335	1.28521	0.866132	33.8028	0.779386	0.42114	2	-0.180653
ODF3B	2.81028e-233	4.64128e-231	2.66399	1.0491	0.903146	32.5903	0.778312	0.464755	2	-0.114973
C5orf49	5.47904e-249	1.06941e-246	2.17877	1.26456	0.845157	33.681	0.77718	0.501745	2	-0.0953818
AC013264.1	1.80975e-266	4.23876e-264	1.74128	1.52873	0.764343	34.8547	0.776367	0.511548	2	-0.0743831
HSPB11	7.83445e-235	1.31069e-232	1.90044	1.25549	0.799506	32.6999	0.776199	0.626087	2	0.209599
OMG	1.45431e-271	3.53479e-269	2.02521	1.5907	0.775447	35.1894	0.776187	0.450993	2	-0.176604
TEKT1	2.08263e-256	4.47141e-254	1.79504	1.40806	0.78285	34.1841	0.775428	0.547695	2	-0.00645471
IGFBP2	1.59081e-227	2.52998e-225	2.50984	0.942497	0.885256	32.1817	0.774436	0.462615	2	-0.134635
ZMYND10	8.75478e-242	1.58844e-239	2.22165	1.18796	0.867366	33.1854	0.774233	0.497579	1	-0.0586844
CDHR3	4.56248e-256	9.63506e-254	1.80164	1.42333	0.809994	34.1612	0.773895	0.413993	2	-0.239302
SRI	4.46551e-223	6.84818e-221	2.37509	0.807793	0.861197	31.8622	0.773761	0.59242	2	0.0548419
C22orf15	5.23304e-269	1.24837e-266	1.51703	1.63653	0.726712	35.0218	0.773083	0.569946	2	0.124223
CFAP126	1.72115e-253	3.51935e-251	1.81653	1.4511	0.753856	33.9872	0.772549	0.564049	2	0.0213959
SKP1	2.2595e-218	3.27044e-216	2.51262	0.601724	0.883405	31.5207	0.771562	0.694022	2	0.237882
FAM166B	4.35132e-260	9.83398e-258	1.61203	1.52413	0.746453	34.4309	0.771183	0.517747	2	-0.0781801
TMEM59	4.10587e-217	5.87687e-215	2.61305	0.62913	0.887107	31.4287	0.770615	0.686547	6	0.225167
IK	6.6286e-222	9.8149e-220	2.26222	1.09065	0.862431	31.7775	0.770408	0.423023	2	-0.203002
IFT27	2.94862e-232	4.80812e-230	1.61103	1.40411	0.76496	32.5182	0.768363	0.573993	2	0.0992168
DPCD	8.49354e-240	1.51964e-237	1.58193	1.52358	0.729796	33.0473	0.766513	0.622744	2	0.292463
LDLRAD1	1.15e-247	2.2111e-245	1.67558	1.45433	0.77298	33.5906	0.766239	0.409346	2	-0.291212
DYNC2H1	4.05966e-254	8.43492e-252	1.41362	1.72644	0.701419	34.0296	0.765885	0.582071	2	0.264937
DRC3	1.41604e-235	2.40018e-233	1.83378	1.31467	0.806909	32.7521	0.765747	0.47638	2	-0.135025
CFAP53	1.29453e-237	2.2844e-235	1.83159	1.36269	0.779149	32.895	0.765548	0.506317	2	-0.0936326
SOD1	3.995e-205	5.19834e-203	2.65928	0.626452	0.88649	30.5387	0.762982	0.556931	2	-0.0203124
NEK5	2.21315e-246	4.13186e-244	1.45025	1.60405	0.714374	33.5025	0.762463	0.536369	2	0.0457217
CDS1	4.02147e-215	5.63093e-213	1.63166	1.25862	0.774213	31.2826	0.760399	0.538879	2	-0.038432
H3F3A	1.40436e-198	1.72295e-196	3.4554	0.393559	0.946329	30.0416	0.759209	0.623764	6	0.0462732
DYDC2	1.4563e-244	2.68001e-242	1.34235	1.73781	0.66934	33.3775	0.756181	0.611031	2	0.420706
KIF9	3.7665e-204	4.80396e-202	1.93543	1.10849	0.822332	30.4652	0.755727	0.537035	2	-0.0391905
C12orf75	1.6539e-218	2.42108e-216	1.7904	1.33571	0.762492	31.5306	0.755697	0.505534	2	-0.085547
SPA17	4.73114e-226	7.4325e-224	1.50082	1.49283	0.718692	32.0762	0.755444	0.525042	2	-0.0283321
CALM1	3.87024e-192	4.29797e-190	3.29212	0.525353	0.943245	29.5444	0.754849	0.372566	2	-0.18019
PRDX1	3.52618e-192	3.94993e-190	3.18706	0.510229	0.933991	29.5476	0.754815	0.62947	2	0.102274
TCTEX1D4	9.39568e-231	1.51294e-228	1.48544	1.51628	0.708822	32.4117	0.753554	0.551917	2	0.0870148
CCDC170	7.19843e-213	9.97098e-211	1.95737	1.24706	0.817397	31.1165	0.753375	0.324872	2	-0.379637
DNPH1	9.63894e-198	1.16046e-195	1.8126	1.09197	0.782233	29.9775	0.753204	0.585056	2	0.0594465
CFAP298	2.25562e-198	2.74121e-196	1.73745	1.16638	0.78285	30.0259	0.751716	0.542458	2	-0.0245801
POLR2I	7.54582e-190	8.23774e-188	2.09933	0.919176	0.829118	29.3656	0.75103	0.549994	2	-0.0215299
CFAP300	2.79031e-222	4.17962e-220	1.48791	1.50789	0.699568	31.8047	0.750681	0.547366	2	0.0554305
PRR29	1.7625e-215	2.495e-213	1.55803	1.36278	0.750771	31.309	0.750375	0.47081	2	-0.14109
AKAP14	3.82734e-237	6.66267e-235	1.31122	1.69806	0.660086	32.8621	0.749837	0.558102	2	0.15441
RPA3	1.22997e-200	1.5383e-198	1.56306	1.34935	0.727329	30.1987	0.749834	0.600878	2	0.20072
CCDC153	1.49916e-222	2.27202e-220	1.37001	1.5537	0.688464	31.8242	0.749068	0.553829	2	0.112038
FXYD3	3.26493e-182	3.39184e-180	3.13595	0.53332	0.925355	28.7614	0.747757	0.626936	6	0.129566
PFDN5	6.84353e-178	6.88737e-176	2.74022	0.457484	0.900062	28.4137	0.745003	0.59305	2	0.0295572
DYNLT1	1.75356e-177	1.75111e-175	2.65624	0.606675	0.888957	28.3806	0.744475	0.50078	2	-0.0790798
IGFBP5	2.71509e-210	3.72083e-208	1.46297	1.46438	0.704503	30.9255	0.744254	0.518653	2	0.0229997
B9D1	1.77832e-207	2.36168e-205	1.42623	1.4568	0.694633	30.7153	0.744139	0.549744	2	0.0645628
SPAG6	2.33192e-208	3.12915e-206	1.48924	1.36518	0.725478	30.7813	0.743754	0.447791	2	-0.229682
DNAH12	3.7355e-197	4.45562e-195	1.8427	1.20552	0.808143	29.9323	0.74179	0.322991	2	-0.415212
IFT57	1.40384e-181	1.43526e-179	1.8927	1.06684	0.793337	28.7107	0.741439	0.481592	2	-0.156621
CDHR4	4.19187e-207	5.51017e-205	1.43554	1.40786	0.714991	30.6874	0.741394	0.469709	2	-0.149652
FABP6	1.03298e-225	1.60323e-223	1.54078	1.74435	0.648982	32.0519	0.741357	0.581623	2	0.394933
MAPK15	7.60083e-201	9.59941e-199	1.4603	1.34017	0.727329	30.2147	0.740958	0.48914	2	-0.0970929
SAXO2	1.45887e-196	1.70847e-194	1.60125	1.25521	0.761875	29.8868	0.739476	0.380505	2	-0.345928
CFAP43	1.23826e-196	1.46342e-194	1.59836	1.28167	0.752005	29.8923	0.738763	0.392931	2	-0.325329
ROPN1L	2.60363e-193	2.96814e-191	1.70285	1.22645	0.750771	29.6356	0.737505	0.456493	2	-0.206246
CCDC146	6.0023e-184	6.39022e-182	1.73224	1.17931	0.783467	28.8998	0.735255	0.342612	2	-0.391993
SPAG8	7.73368e-205	9.96253e-203	1.22727	1.4986	0.667489	30.5171	0.734762	0.485794	2	-0.0822709
SLC44A4	4.08206e-165	3.83833e-163	2.06943	0.755539	0.827884	27.3602	0.734474	0.524619	2	-0.0750498
SARAF	2.30929e-162	2.10981e-160	2.10833	0.653803	0.833436	27.1279	0.732939	0.576032	2	0.0130504
TBCA	1.75732e-161	1.59422e-159	2.06079	0.652966	0.832202	27.0531	0.732388	0.59812	2	0.0683447
CFAP157	1.05844e-173	1.04883e-171	2.13215	1.04636	0.853794	28.0726	0.731476	0.328712	2	-0.352092
DNAAF4	9.1537e-195	1.05284e-192	1.24483	1.5038	0.656385	29.7482	0.731188	0.539457	2	0.117324
CLU	7.28629e-159	6.38517e-157	2.89713	0.57572	0.913017	26.8297	0.731051	0.539736	2	0.00537165
DSTN	1.69346e-158	1.46411e-156	2.45844	0.511703	0.869217	26.7982	0.73076	0.591676	2	0.037967
EFCAB1	8.73291e-183	9.14613e-181	1.56793	1.20609	0.744602	28.8071	0.730598	0.407912	2	-0.303488
AL357093.2	4.08512e-187	4.42223e-185	1.73166	1.28513	0.734732	29.1508	0.730025	0.398704	2	-0.330129
RPS20	4.61624e-157	3.93817e-155	2.50271	0.699473	0.862431	26.6748	0.729359	0.520632	6	0.043676
NQO1	3.71355e-165	3.54356e-163	1.77084	1.09506	0.762492	27.3637	0.729084	0.51345	2	-0.0313175
CLUAP1	3.21042e-180	3.25643e-178	1.30355	1.40142	0.67736	28.6016	0.728828	0.520442	2	-0.00200123
TSPAN1	3.27481e-154	2.72168e-152	3.52222	0.479075	0.952498	26.4279	0.727807	0.534093	2	-0.0181803
KCTD12	2.10828e-190	2.32127e-188	1.26825	1.53773	0.648365	29.409	0.727248	0.534279	2	0.129511
CD164L2	5.32106e-193	6.01279e-191	1.19075	1.56057	0.640345	29.6115	0.726984	0.541913	2	0.168396
NDUFB1	3.06279e-152	2.46593e-150	2.04837	0.608633	0.829735	26.2559	0.725731	0.611892	2	0.101769
MNS1	9.62655e-182	9.92074e-180	1.29988	1.35482	0.67736	28.7238	0.724803	0.478998	2	-0.121114
AC013470.2	5.88368e-210	7.97827e-208	1.02699	1.86927	0.578655	30.9005	0.724004	0.551919	2	0.343341
DEGS2	3.91e-165	3.70358e-163	1.38703	1.31471	0.678593	27.3618	0.723338	0.576289	2	0.22854
CFAP52	1.93357e-183	2.04166e-181	1.17529	1.44929	0.639729	28.8594	0.721925	0.502525	2	-0.0497698
HSPH1	3.70966e-149	2.86154e-147	2.13969	0.854529	0.851326	25.9845	0.721467	0.356786	2	-0.317488
RABL2B	2.64809e-165	2.54573e-163	1.31037	1.24817	0.696484	27.376	0.719859	0.466931	2	-0.167867
ERGIC3	5.47234e-145	3.98275e-143	1.97307	0.682609	0.811228	25.6129	0.719567	0.495735	2	-0.138989
C9orf135	2.67874e-166	2.59456e-164	1.4255	1.19083	0.700802	27.4595	0.718677	0.497201	2	-0.104647
IFT43	1.36862e-153	1.11586e-151	1.43514	1.14533	0.713757	26.3738	0.717655	0.511526	2	-0.0733993
DPY30	2.13401e-148	1.60762e-146	1.56318	1.072	0.725478	25.9171	0.717588	0.533082	2	-0.013849
EPPIN	2.72598e-195	3.16362e-193	1.12487	1.7417	0.585441	29.7888	0.717326	0.537257	2	0.265933
RPL13A	1.59236e-139	1.06837e-137	3.65783	0.426362	0.93831	25.1177	0.716761	0.47548	6	0.00773276
FOXJ1	5.42862e-153	4.39821e-151	1.92397	0.98474	0.814929	26.3216	0.715879	0.401077	1	-0.246425
ALDH1A1	3.83059e-140	2.61088e-138	2.61326	0.646301	0.884639	25.1743	0.715778	0.547367	2	0.00580393
SPAG16	4.35232e-154	3.57112e-152	1.38257	1.25551	0.679827	26.4172	0.715751	0.526054	2	-0.0178825
SPATA18	1.84529e-161	1.66231e-159	1.38902	1.19286	0.704503	27.0513	0.71563	0.419083	2	-0.306373
TAX1BP1	4.12513e-140	2.79684e-138	1.82875	0.747795	0.799506	25.1714	0.715325	0.499083	2	-0.113156
CCDC33	9.38704e-164	8.76259e-162	1.27228	1.29346	0.662554	27.2455	0.714114	0.502442	2	-0.0546052
WDR38	1.53413e-158	1.33532e-156	1.55985	1.12568	0.730413	26.8019	0.714	0.39415	2	-0.335976
HSBP1	2.2927e-136	1.50686e-134	2.48528	0.484235	0.876619	24.827	0.713828	0.483459	2	-0.113493
TOMM7	1.45193e-136	9.59166e-135	2.1984	0.503002	0.855028	24.8453	0.713797	0.574655	6	0.00162286
AC244090.1	5.93081e-163	5.49645e-161	1.19706	1.40542	0.641579	27.1779	0.713674	0.553538	2	0.2032
ZBBX	2.22616e-162	2.04838e-160	1.29392	1.24746	0.684146	27.1292	0.713449	0.427817	2	-0.259056
FAM216B	1.05368e-168	1.02829e-166	1.33775	1.26756	0.676743	27.6601	0.713236	0.3408	2	-0.503256
WDR66	3.44726e-160	3.08386e-158	1.27354	1.24205	0.67736	26.943	0.712516	0.442767	2	-0.237479
SSBP4	5.21583e-147	3.83945e-145	1.33667	1.15741	0.695867	25.7937	0.711789	0.517656	2	-0.0319714
BASP1	4.12377e-149	3.16205e-147	1.50964	1.11979	0.713757	25.9804	0.71174	0.427357	2	-0.285337
LRRC23	3.31562e-144	2.38614e-142	1.74584	0.993562	0.784084	25.5426	0.711101	0.397624	2	-0.296424
FAM174A	4.72327e-141	3.25375e-139	1.52765	1.03633	0.726712	25.2572	0.710967	0.507669	2	-0.0988747
RIIAD1	3.24787e-173	3.19382e-171	1.11717	1.50631	0.602714	28.0327	0.710599	0.505938	2	0.0209476
DMKN	4.14251e-141	2.88453e-139	1.49586	1.01015	0.732881	25.2624	0.710579	0.514965	2	-0.0776018
COPRS	2.29336e-148	1.71762e-146	1.25963	1.28569	0.658853	25.9144	0.710299	0.574012	6	0.264662
RPS11	9.48067e-131	5.98676e-129	2.75928	0.39413	0.902529	24.3014	0.70958	0.544764	6	0.000206964
P4HTM	4.75669e-140	3.20815e-138	1.43387	1.04787	0.723627	25.1657	0.709338	0.476639	2	-0.152856
RUVBL2	1.4363e-138	9.58674e-137	1.60547	0.998325	0.74707	25.0301	0.709262	0.477711	2	-0.172029
TUSC3	6.47748e-143	4.55972e-141	1.34871	1.15848	0.688464	25.4262	0.708812	0.495561	2	-0.094991
LRRC46	8.4437e-149	6.4362e-147	1.57357	1.06487	0.75694	25.9528	0.708682	0.306819	2	-0.48627
ARL3	5.67315e-144	4.03765e-142	1.28533	1.24765	0.660703	25.5216	0.707986	0.536811	2	0.0486947
DZIP3	6.17164e-160	5.48297e-158	1.17319	1.36292	0.63356	26.9214	0.707848	0.429375	2	-0.270912
ALDH3B1	4.36172e-138	2.89627e-136	1.55787	1.01713	0.749537	24.9858	0.707287	0.378896	2	-0.350532
RUVBL1	5.18043e-148	3.85747e-146	1.19235	1.30589	0.646514	25.883	0.707097	0.540561	2	0.103357
PRKAR1A	7.80936e-130	4.8835e-128	1.75237	0.738684	0.796422	24.2146	0.706908	0.450204	2	-0.210093
CCDC173	1.65307e-159	1.45855e-157	1.15461	1.34862	0.632326	26.8848	0.706898	0.497804	2	-0.0152626
ABCA5	3.70457e-150	2.90989e-148	1.13222	1.47539	0.623072	26.0729	0.706796	0.574071	2	0.401754
HLA-DRA	1.17539e-127	7.24465e-126	2.566	0.647465	0.859346	24.007	0.706144	0.499142	2	-0.0505872
RP1	2.44844e-157	2.10272e-155	1.22973	1.3448	0.639729	26.6985	0.705746	0.425301	2	-0.262928
ARMC3	1.2122e-148	9.18564e-147	1.32189	1.1445	0.68723	25.9389	0.705243	0.397019	2	-0.366673
OSCP1	2.02228e-149	1.57885e-147	1.18928	1.25941	0.648982	26.0078	0.705076	0.480639	2	-0.125407
RFX3	1.99991e-150	1.58055e-148	1.1689	1.31504	0.640962	26.0965	0.704241	0.428319	2	-0.266833
C21orf58	6.05284e-155	5.06316e-153	1.14918	1.31269	0.631709	26.4916	0.704228	0.476048	2	-0.0958709
AC007906.2	5.12904e-141	3.51448e-139	1.64902	1.07146	0.729796	25.2539	0.70373	0.344404	2	-0.46623
LDHB	2.83727e-126	1.70793e-124	1.80619	0.730122	0.766811	23.8742	0.70369	0.629573	2	0.273823
PROM1	2.70978e-151	2.16816e-149	1.21571	1.3263	0.638495	26.1728	0.703592	0.408334	2	-0.321262
HSP90AB1	5.56136e-123	3.18406e-121	2.99822	0.449097	0.928439	23.5551	0.703153	0.375987	2	-0.204342
WRB	2.26948e-147	1.6802e-145	1.08897	1.41111	0.611351	25.8259	0.702079	0.524171	2	0.0906555
TEKT2	3.55232e-146	2.60006e-144	1.21536	1.20297	0.647748	25.7193	0.701311	0.490108	1	-0.0685723
TMEM67	5.5149e-157	4.67388e-155	0.994613	1.53498	0.578655	26.6681	0.7007	0.52214	2	0.168704
MGST3	8.10616e-125	4.7682e-123	1.44066	0.938603	0.71314	23.7336	0.700059	0.601615	2	0.25661
METRN	3.33542e-144	2.38705e-142	1.13184	1.53785	0.58359	25.5424	0.696468	0.558818	6	0.373625
AKAP9	1.9179e-115	1.02943e-113	1.90743	0.696388	0.821715	22.8078	0.695297	0.415843	2	-0.240933
GABPB1-AS1	2.83618e-136	1.8546e-134	1.17873	1.40972	0.611351	24.8184	0.695248	0.571797	2	0.452587
COX6A1	1.67583e-113	8.95771e-112	2.61865	0.357549	0.919803	22.6113	0.695016	0.593629	2	0.0744084
CATSPERD	1.03008e-150	8.19107e-149	1.04267	1.39413	0.582357	26.1218	0.694681	0.497093	2	0.0176349
WDR78	4.32742e-141	2.99709e-139	1.10748	1.27442	0.616903	25.2606	0.694544	0.428554	2	-0.274123
ALOX15	1.00216e-126	6.08954e-125	1.43417	1.07318	0.688464	23.9177	0.694481	0.425759	2	-0.267344
ANKRD66	7.87512e-156	6.63054e-154	0.986832	1.47952	0.563849	26.5684	0.694401	0.452121	2	-0.160678
NDUFA4	7.84954e-113	4.17842e-111	2.34901	0.402332	0.864898	22.5431	0.694104	0.616206	6	0.0722119
EFCAB10	2.78398e-149	2.16044e-147	1.00459	1.42292	0.574954	25.9955	0.69377	0.462036	2	-0.136576
ENKUR	6.48353e-135	4.19702e-133	1.23431	1.13025	0.659469	24.6922	0.693547	0.363888	2	-0.451814
ENDOG	3.37181e-132	2.16098e-130	1.12544	1.29286	0.614436	24.438	0.693309	0.524375	2	0.0756899
FAM227A	1.17081e-143	8.28704e-142	1.04184	1.40389	0.587909	25.4933	0.692904	0.472111	2	-0.0453404
CFAP45	1.68696e-130	1.06007e-128	1.29932	1.08504	0.670574	24.2777	0.692041	0.419673	2	-0.303116
METTL7A	1.78065e-121	1.00167e-119	1.28499	1.1355	0.6533	23.4078	0.691335	0.489739	2	-0.0892896
MLF1	6.48345e-123	3.69557e-121	1.29784	1.08579	0.659469	23.5486	0.690937	0.501776	2	-0.0816304
HSPA8	1.10746e-108	5.75256e-107	2.83845	0.424659	0.934608	22.1161	0.690685	0.462052	2	-0.0995261
NUCB2	4.38309e-109	2.28595e-107	2.31447	0.588207	0.858112	22.1578	0.689942	0.396065	2	-0.251813
GSTA2	2.72139e-132	1.75285e-130	1.67542	1.46939	0.603948	24.4468	0.689654	0.499938	2	0.0771997
DNAH9	4.96898e-129	3.09229e-127	1.24141	1.10247	0.658236	24.1382	0.688558	0.348889	2	-0.489449
PACRG	1.45927e-142	1.02165e-140	0.930924	1.45069	0.553979	25.3943	0.688342	0.502351	2	0.0604278
EPHX1	4.13474e-110	2.19192e-108	1.6346	0.777047	0.742134	22.2639	0.688194	0.522258	2	-0.0137209
DNAI1	5.83963e-131	3.72407e-129	1.08828	1.21391	0.616286	24.3213	0.68731	0.434595	2	-0.218126
TNFAIP8L1	8.12203e-129	5.03019e-127	1.13846	1.15223	0.624923	24.1178	0.687102	0.425249	2	-0.293886
DCDC2B	9.21597e-145	6.66967e-143	0.935609	1.43827	0.550895	25.5926	0.68632	0.448982	2	-0.151719
SPACA9	6.65768e-125	3.93414e-123	1.13805	1.18729	0.621838	23.7419	0.685875	0.43741	2	-0.244691
TMEM231	6.70072e-123	3.80259e-121	1.26897	1.06541	0.667489	23.5472	0.685635	0.326072	2	-0.537212
PROS1	3.67836e-154	3.03748e-152	0.968109	1.70539	0.512647	26.4235	0.68486	0.491059	2	0.10541
SPAG17	1.45626e-123	8.45025e-122	1.20557	1.0757	0.653917	23.6118	0.684815	0.363323	2	-0.452623
CTSS	3.98045e-105	1.98745e-103	1.62376	0.769505	0.749537	21.7435	0.684566	0.440376	2	-0.23793
AC084033.3	1.64326e-126	9.93823e-125	1.09825	1.19605	0.611351	23.8971	0.684112	0.451948	2	-0.169283
MORF4L2	1.44138e-103	7.08699e-102	1.47382	0.742994	0.721777	21.5781	0.68337	0.568442	2	0.0922769
RSPH4A	1.82488e-127	1.11943e-125	1.04727	1.21768	0.593461	23.9887	0.682451	0.374467	2	-0.459234
STOML3	1.72175e-135	1.12018e-133	0.958565	1.36596	0.553979	24.7458	0.681772	0.408784	2	-0.342152
CEP126	2.6392e-116	1.43452e-114	1.20396	1.05392	0.652684	22.8944	0.681389	0.420206	2	-0.288455
CFAP73	5.16027e-117	2.81672e-115	1.25225	1.02154	0.666872	22.9655	0.681366	0.359431	2	-0.447147
NDUFB8	2.58486e-118	1.42911e-116	1.05007	1.42275	0.569402	23.0952	0.680411	0.554979	6	0.361688
ARHGAP18	2.97735e-102	1.43649e-100	1.43755	0.85657	0.724244	21.4376	0.679037	0.369525	2	-0.394959
IFT22	4.0483e-107	2.08601e-105	1.27922	0.990585	0.665022	21.9531	0.678693	0.456863	2	-0.221645
NDUFC2	8.54706e-106	4.35191e-104	1.18652	1.18578	0.61752	21.814	0.678495	0.553635	6	0.252934
DNAJB13	6.1123e-127	3.73169e-125	0.926174	1.37191	0.54781	23.9383	0.678353	0.481054	2	-0.0124687
CFAP70	1.49729e-117	8.24276e-116	1.13108	1.17291	0.613202	23.0192	0.678303	0.396003	2	-0.343682
CRNDE	8.18791e-98	3.86361e-96	1.56186	0.715935	0.737816	20.9565	0.67803	0.507507	1	-0.0579071
RRAD	3.3907e-108	1.75418e-106	1.49642	0.911974	0.690932	22.0655	0.67792	0.367251	1	-0.519908
C11orf16	6.8206e-126	4.06773e-124	0.943299	1.33632	0.553979	23.8375	0.677602	0.454262	2	-0.129567
TSPAN6	2.2249e-102	1.08155e-100	1.20462	1.00168	0.647131	21.4512	0.677517	0.509684	2	-0.0245687
SPEF2	7.39399e-116	3.98533e-114	1.11918	1.10316	0.623072	22.8495	0.677492	0.374761	2	-0.429721
NAP1L1	1.41042e-96	6.51221e-95	1.59338	0.690724	0.742134	20.8205	0.677171	0.513028	6	-0.0748609
C19orf70	2.57725e-96	1.17731e-94	1.5308	0.689074	0.726712	20.7916	0.677025	0.560026	2	0.0453593
DNAH7	3.42911e-116	1.85604e-114	1.08698	1.16104	0.604565	22.883	0.676821	0.392454	2	-0.375882
CYP4B1	1.47794e-95	6.7038e-94	2.12078	0.626663	0.801974	20.7076	0.676789	0.398854	2	-0.278787
C6orf118	4.56259e-119	2.53342e-117	0.994717	1.20264	0.579272	23.1701	0.675595	0.379628	2	-0.442808
LRTOMT	3.12822e-126	1.87431e-124	0.856972	1.47409	0.524368	23.8701	0.675281	0.488551	2	0.0669282
CYSTM1	4.02718e-93	1.7889e-91	1.95852	0.53214	0.798273	20.4357	0.675262	0.510246	2	-0.0937756
AZIN1	2.61249e-97	1.21495e-95	1.34924	0.909409	0.678593	20.9012	0.674419	0.466662	2	-0.184309
PIH1D3	9.31873e-131	5.91349e-129	0.818403	1.48226	0.510179	24.3021	0.67389	0.464537	2	-0.0369796
CENPM	3.00296e-123	1.73472e-121	0.944514	1.49628	0.526218	23.5812	0.673881	0.54691	6	0.457832
SSB	1.16622e-93	5.2346e-92	1.46409	0.784444	0.70327	20.4961	0.673342	0.522315	2	-0.0414227
CCDC114	9.10393e-106	4.6172e-104	1.22303	0.978097	0.658236	21.8111	0.672926	0.384466	2	-0.383641
FANK1	8.86575e-107	4.55014e-105	1.06819	1.09781	0.606416	21.9174	0.670823	0.405636	2	-0.332805
TTC25	2.23655e-117	1.22601e-115	0.892046	1.30646	0.541641	23.0018	0.670679	0.434104	2	-0.211072
YWHAE	5.93777e-88	2.51613e-86	1.9019	0.451217	0.807526	19.8462	0.670548	0.497243	2	-0.12464
NDUFA1	1.07756e-87	4.52155e-86	1.92456	0.397211	0.826033	19.8163	0.670492	0.607832	2	0.0936657
SLC27A2	2.34012e-100	1.12065e-98	1.06778	1.18087	0.592227	21.2335	0.670275	0.517656	2	0.110323
GPR162	9.60887e-110	5.07301e-108	0.983114	1.131	0.578655	22.2261	0.668861	0.399236	2	-0.369074
RPL27A	1.42828e-85	5.78588e-84	2.63291	0.410676	0.866132	19.5687	0.668601	0.424297	6	-0.148854
IQCG	1.04971e-101	5.04563e-100	1.09586	1.00542	0.624923	21.3789	0.668295	0.374768	2	-0.437354
STK33	1.06989e-109	5.62545e-108	0.955674	1.1652	0.572486	22.2213	0.668264	0.375845	2	-0.428245
PTGES3	9.18454e-86	3.73234e-84	1.87438	0.519977	0.816163	19.5912	0.66816	0.429115	2	-0.218425
XIST	9.3401e-98	4.39121e-96	1.1693	1.11183	0.600864	20.9502	0.667537	0.551024	6	0.309869
TOGARAM2	1.88324e-109	9.86176e-108	1.00064	1.22036	0.561999	22.1959	0.667453	0.416984	2	-0.262828
ATP2A2	1.85446e-86	7.65679e-85	1.46868	0.723688	0.720543	19.6725	0.666703	0.462578	2	-0.182459
C11orf74	2.17579e-105	1.09916e-103	0.950062	1.26599	0.553362	21.7712	0.666604	0.463978	2	-0.0922122
AC004832.1	3.05183e-104	1.51207e-102	0.993349	1.10879	0.581123	21.6498	0.666125	0.424689	2	-0.274886
IFT172	5.9089e-93	2.61575e-91	1.11901	1.01596	0.62554	20.417	0.665493	0.431322	2	-0.271257
DYNC2LI1	3.05625e-103	1.49698e-101	0.911273	1.34675	0.540407	21.5433	0.665202	0.495376	2	0.0978474
KIF21A	1.22344e-86	5.06764e-85	1.42117	0.80589	0.701419	19.6936	0.664917	0.349803	2	-0.462863
GON7	3.20821e-97	1.48662e-95	1.05336	1.10792	0.587909	20.8914	0.664423	0.428861	2	-0.280091
UQCR11	2.21325e-81	8.69239e-80	2.28405	0.329527	0.875386	19.0707	0.664334	0.579401	6	0.0205002
H2AFJ	2.67216e-81	1.04312e-79	1.95121	0.440355	0.803208	19.0608	0.663867	0.433692	1	-0.158378
DNAI2	5.93942e-103	2.89817e-101	1.03392	1.08699	0.58174	21.5126	0.663685	0.351983	2	-0.512053
CD164	2.24502e-81	8.79037e-80	1.70474	0.522289	0.770512	19.0699	0.663452	0.489421	2	-0.133379
TCTN1	5.51122e-96	2.50868e-94	1.02064	1.06094	0.590376	20.7551	0.662951	0.410787	2	-0.349586
FXYD1	5.29798e-123	3.04681e-121	0.842994	1.67763	0.463911	23.5572	0.662123	0.522621	2	0.448642
FGF14	3.62039e-122	2.04552e-120	0.757366	1.53206	0.467613	23.4756	0.66171	0.463617	2	-0.0243112
CFAP206	4.58988e-125	2.72474e-123	0.67344	1.71473	0.44232	23.7576	0.659754	0.518627	2	0.451936
CD24	1.85724e-76	6.91474e-75	2.72106	0.419321	0.89451	18.4683	0.658998	0.370498	2	-0.244861
CHMP2A	1.41693e-77	5.35277e-76	1.40014	0.629261	0.696484	18.6067	0.658302	0.572737	2	0.117982
WDR34	9.25185e-81	3.58983e-79	1.22397	0.835525	0.654534	18.9957	0.657592	0.492196	2	-0.104433
HIPK1	1.65575e-83	6.62401e-82	1.11026	0.958127	0.622455	19.325	0.657498	0.43015	2	-0.268201
NDUFA3	2.37348e-75	8.71087e-74	1.68029	0.490132	0.769895	18.3303	0.657187	0.525327	2	-0.042913
IQCD	1.44832e-96	6.6633e-95	0.869566	1.15016	0.539173	20.8193	0.657045	0.427374	2	-0.249661
RPL7	2.62749e-74	9.5614e-73	2.64799	0.359975	0.882171	18.199	0.656815	0.432049	6	-0.150982
FHAD1	6.63928e-93	2.92901e-91	0.984083	1.05623	0.570635	20.4113	0.656278	0.357579	2	-0.504253
DTHD1	1.72334e-95	7.78951e-94	0.972576	1.05219	0.568168	20.7002	0.656192	0.328145	2	-0.596003
GTF2H5	2.8158e-79	1.08278e-77	1.1054	0.945294	0.613202	18.8156	0.655824	0.556044	6	0.247645
PDLIM4	3.52329e-77	1.31939e-75	1.37573	0.790945	0.663171	18.5579	0.655796	0.554256	2	0.165207
TTLL10	1.29129e-94	5.81621e-93	0.948789	1.14185	0.545959	20.6029	0.655502	0.388941	2	-0.378185
AL121899.1	1.42242e-104	7.07475e-103	0.791481	1.38423	0.484886	21.685	0.655164	0.486396	2	0.141151
PLAC8	1.04695e-73	3.78842e-72	1.9764	0.478038	0.803208	18.1231	0.655102	0.567819	2	0.041622
CFAP65	1.38165e-92	6.05386e-91	0.928957	1.14527	0.536706	20.3754	0.653719	0.419023	2	-0.257012
PFN2	1.60282e-77	6.03729e-76	1.14932	0.876899	0.630475	18.6001	0.65366	0.45951	2	-0.180902
CATIP	1.11595e-99	5.32432e-98	0.798226	1.29381	0.493523	21.16	0.653365	0.488243	2	0.111234
DDX17	1.03451e-71	3.71215e-70	1.69651	0.526991	0.772363	17.8687	0.653237	0.498763	2	-0.0831961
ATP5MPL	2.49811e-71	8.9143e-70	1.71787	0.407683	0.768044	17.8194	0.652971	0.599096	6	0.0964561
TUBA4B	1.29385e-88	5.50079e-87	1.01465	0.917951	0.587292	19.9227	0.652951	0.383631	2	-0.43405
UBXN10	4.78644e-89	2.04169e-87	0.932998	1.061	0.556447	19.9724	0.652799	0.38141	2	-0.426599
DNALI1	5.19721e-77	1.94059e-75	1.52252	0.747012	0.72301	18.537	0.652384	0.283606	2	-0.569417
HSPBP1	1.9873e-77	7.46368e-76	1.14926	0.91222	0.622455	18.5886	0.651997	0.440194	2	-0.252846
DNAAF3	2.21696e-93	9.88195e-92	0.853367	1.17513	0.517582	20.4648	0.651806	0.419878	2	-0.255803
CLTA	4.91712e-70	1.72126e-68	1.76592	0.377814	0.77483	17.6519	0.651627	0.555824	2	-0.0159777
C7orf57	2.13183e-93	9.5355e-92	0.821437	1.15598	0.517582	20.4667	0.651626	0.430177	2	-0.218179
CES4A	2.27354e-97	1.06115e-95	0.820742	1.41012	0.485503	20.9078	0.651592	0.460681	2	0.0281113
ODF2L	3.56927e-72	1.28434e-70	1.43232	0.667359	0.72301	17.9279	0.651499	0.432159	2	-0.250928
TMEM107	2.18497e-91	9.47702e-90	0.818585	1.26	0.506477	20.2398	0.651443	0.470898	2	-0.0145129
LRRC10B	1.13687e-92	4.99835e-91	0.855115	1.10868	0.526218	20.385	0.650924	0.359299	2	-0.519245
VWA3B	6.45808e-88	2.72764e-86	0.968659	1.00553	0.564466	19.842	0.650415	0.319307	2	-0.628654
LRRC34	2.29455e-102	1.11122e-100	0.720596	1.48099	0.456508	21.4498	0.650415	0.462327	2	0.0544603
DENND6B	6.92438e-86	2.82278e-84	0.907922	1.10323	0.542258	19.6056	0.649697	0.428563	2	-0.217424
LRWD1	6.3269e-85	2.55496e-83	0.874382	1.19617	0.526218	19.4927	0.64909	0.485546	2	0.0604277
CAT	3.72288e-87	1.55204e-85	0.795478	1.40908	0.495373	19.7538	0.649029	0.532287	2	0.435835
PPP1R42	1.9466e-96	8.92388e-95	0.750476	1.30385	0.478717	20.8051	0.648897	0.439849	2	-0.131185
PPIL6	1.95321e-79	7.53331e-78	1.11632	0.880012	0.611351	18.8349	0.648761	0.374105	2	-0.448676
TMC5	4.82512e-68	1.66196e-66	1.74115	0.557647	0.772363	17.391	0.64832	0.322912	2	-0.452379
SLC22A4	2.2515e-91	9.73285e-90	0.814182	1.21502	0.497841	20.2383	0.647931	0.381506	2	-0.446602
EFCAB2	4.7812e-83	1.90097e-81	0.867181	1.11797	0.534855	19.2702	0.647847	0.430422	2	-0.238239
CC2D2A	4.4288e-86	1.82274e-84	0.856229	1.09984	0.531771	19.6283	0.647762	0.369396	2	-0.463072
LINC01571	1.4272e-103	7.04413e-102	0.721341	1.46611	0.445404	21.5786	0.647748	0.433888	2	-0.12904
DNAL1	1.01419e-83	4.07001e-82	0.884837	1.1367	0.528069	19.3503	0.647511	0.440288	2	-0.18908
CCDC74A	1.0467e-82	4.14878e-81	0.992945	0.960458	0.566317	19.2296	0.647307	0.392672	2	-0.396044
ACBD3-AS1	3.30765e-105	1.65794e-103	0.664822	1.5478	0.430598	21.752	0.646894	0.495444	2	0.286358
MAATS1	8.99297e-88	3.78586e-86	0.832201	1.17117	0.509562	19.8254	0.646828	0.408839	2	-0.275148
MORF4L1	4.50004e-66	1.51753e-64	1.54683	0.474884	0.73103	17.1291	0.646466	0.538466	2	-0.0257784
AHSA1	1.12744e-69	3.93596e-68	1.18419	0.826926	0.62739	17.605	0.646375	0.473082	2	-0.158836
NWD1	6.59893e-84	2.65648e-82	0.912794	1.05063	0.541024	19.3724	0.645495	0.303146	2	-0.694539
FAM81B	1.42299e-79	5.50479e-78	1.02189	0.898465	0.584207	18.8517	0.645384	0.322916	2	-0.60458
EFHC2	8.5694e-99	4.07347e-97	0.686929	1.51882	0.439235	21.0637	0.645262	0.465422	2	0.12587
CLIC6	2.12536e-70	7.50107e-69	1.04784	0.945051	0.593461	17.6992	0.645113	0.490532	2	-0.00440529
POU2AF1	8.11642e-90	3.48519e-88	0.819875	1.34331	0.479334	20.0608	0.645109	0.463869	2	0.0453948
BX005040.1	9.3356e-124	5.44169e-122	0.571994	1.82652	0.380629	23.6306	0.645	0.535953	6	0.757558
NDUFA13	3.36913e-65	1.13024e-63	1.40197	0.583061	0.706354	17.0116	0.644947	0.571116	1	0.243067
NDUFAF3	3.06695e-66	1.03697e-64	1.28068	0.6685	0.667489	17.1514	0.644664	0.520504	6	-0.0247301
RGS22	1.85455e-97	8.68737e-96	0.709054	1.42097	0.445404	20.9175	0.644352	0.4303	2	-0.131382
CCL15	6.72249e-124	3.93632e-122	0.554953	1.80524	0.378162	23.6445	0.644308	0.546602	6	0.774743
NEK10	4.77915e-86	1.96067e-84	0.84656	1.18507	0.502776	19.6245	0.64425	0.368668	2	-0.437132
CABCOCO1	1.22007e-86	5.06764e-85	0.786546	1.18619	0.490438	19.6937	0.643975	0.409385	2	-0.318502
TRIP13	2.90745e-91	1.25264e-89	0.757805	1.40347	0.460827	20.2257	0.643963	0.456549	2	0.00340009
MRPL40	4.23386e-68	1.46221e-66	1.09474	0.854697	0.605182	17.3985	0.643827	0.519391	2	0.0483235
KCNRG	2.70871e-105	1.36303e-103	0.619467	1.63514	0.411474	21.7611	0.643699	0.489108	2	0.307539
SPEF1	5.57556e-79	2.13129e-77	0.911676	0.982495	0.544725	18.7793	0.643558	0.431811	2	-0.265568
CCDC113	3.13185e-76	1.15932e-74	1.02977	0.901669	0.584207	18.4401	0.643004	0.294169	2	-0.689393
C20orf96	1.15474e-78	4.40099e-77	0.868795	1.06618	0.526835	18.7406	0.642361	0.417967	2	-0.282624
MDH1B	3.56468e-87	1.49091e-85	0.732376	1.24413	0.471931	19.756	0.64174	0.423286	2	-0.203672
RIBC1	2.12213e-82	8.38567e-81	0.756339	1.21322	0.477483	19.1929	0.639778	0.455533	2	-0.0544176
NPHP1	9.71417e-73	3.50526e-71	0.908546	0.974108	0.544109	18.0002	0.638472	0.396781	2	-0.364682
LAPTM4A	1.43556e-59	4.46688e-58	1.43684	0.511714	0.698951	16.2346	0.638393	0.601349	3	0.284371
DBI	1.02533e-59	3.19815e-58	1.4361	0.513078	0.697101	16.2552	0.638254	0.557138	2	0.0625691
CFAP221	8.87136e-76	3.26517e-74	0.837275	1.01735	0.516348	18.3837	0.636883	0.338409	2	-0.574442
DNAJA4	3.75846e-60	1.17802e-58	1.35847	0.676024	0.68723	16.3166	0.636562	0.296031	2	-0.590433
CCDC181	4.06495e-83	1.6212e-81	0.707868	1.34568	0.443553	19.2786	0.63539	0.437794	2	-0.0673426
STMND1	8.00913e-78	3.04347e-76	0.7623	1.17638	0.471931	18.6373	0.635323	0.425421	2	-0.191701
DNAH2	1.37342e-77	5.20365e-76	0.792826	1.15592	0.479334	18.6084	0.635234	0.379468	2	-0.40008
HYDIN	2.94876e-68	1.02113e-66	1.03782	0.802994	0.589143	17.4192	0.635151	0.288712	2	-0.701654
DLEC1	2.55705e-71	9.09943e-70	0.952502	0.970082	0.534238	17.8181	0.635035	0.359786	2	-0.465509
NDUFAB1	4.92142e-57	1.48472e-55	1.34886	0.527464	0.689081	15.8724	0.634859	0.501847	2	-0.0938358
MYCBP	2.6523e-64	8.78329e-63	0.903984	1.02603	0.541024	16.8903	0.634213	0.449015	2	-0.161939
CST6	7.28195e-82	2.86869e-80	0.794686	1.41035	0.439852	19.1287	0.63394	0.525231	2	0.556876
ARMC4	3.56633e-79	1.36731e-77	0.714707	1.16295	0.461444	18.803	0.633811	0.37312	2	-0.448039
SPATA33	3.19112e-69	1.11103e-67	0.827494	1.06613	0.508328	17.546	0.633756	0.454797	2	-0.101135
PSMA4	1.62204e-56	4.87066e-55	1.17429	0.720124	0.626774	15.7974	0.632841	0.572713	6	0.34889
DNAH6	8.84772e-71	3.13985e-69	0.868732	0.97554	0.519432	17.7485	0.632822	0.329819	2	-0.608818
ZNF273	2.71148e-75	9.92309e-74	0.746867	1.27098	0.46021	18.323	0.632515	0.43232	2	-0.0893709
PCM1	2.08431e-56	6.24421e-55	1.3335	0.633284	0.698951	15.7815	0.632477	0.323214	2	-0.516504
UBXN11	2.04655e-59	6.33741e-58	1.2122	0.670618	0.652067	16.2128	0.631988	0.291055	1	-0.727302
VAPA	5.09369e-54	1.50844e-52	1.43749	0.431442	0.726095	15.4306	0.631943	0.540316	2	0.0116605
CTSH	2.7334e-56	8.16976e-55	1.16377	0.714453	0.624923	15.7644	0.631928	0.522509	2	0.0654585
TCTEX1D1	5.76582e-76	2.12823e-74	0.725926	1.16387	0.459593	18.4071	0.631785	0.396645	2	-0.328018
VPS35	8.56426e-57	2.57768e-55	1.09177	0.759921	0.605799	15.8376	0.631644	0.456258	2	-0.219458
CTXN1	1.94815e-66	6.60424e-65	0.883487	0.892414	0.534855	17.1778	0.630861	0.355797	2	-0.526725
RIPOR2	1.00468e-74	3.66638e-73	0.712641	1.22817	0.45219	18.2516	0.630597	0.41338	2	-0.245753
NME7	1.04856e-67	3.57344e-66	0.767867	1.15108	0.484269	17.3465	0.630585	0.44991	2	-0.0757508
ZC2HC1A	5.19202e-68	1.78356e-66	0.777678	1.15005	0.48612	17.3868	0.630582	0.423166	2	-0.216995
MAP1A	1.51461e-71	5.41978e-70	0.798623	1.07233	0.483652	17.8474	0.630319	0.338718	2	-0.584326
PSMB1	1.26269e-52	3.70524e-51	1.38471	0.486321	0.693399	15.222	0.629862	0.595866	2	0.252632
DALRD3	3.723e-65	1.24571e-63	0.818311	1.1298	0.494756	17.0057	0.629759	0.465532	2	-0.0167573
DYNLRB1	2.04363e-52	5.96963e-51	1.42303	0.450909	0.700802	15.1905	0.629663	0.518565	2	-0.0658306
HNRNPF	7.61758e-52	2.1953e-50	1.4908	0.449624	0.726095	15.104	0.62908	0.476956	2	-0.176447
BBOF1	1.7735e-62	5.74027e-61	0.928996	0.833705	0.55768	16.6405	0.628941	0.354856	2	-0.506402
MUC15	8.84467e-60	2.76546e-58	0.89137	0.985618	0.535472	16.2643	0.628692	0.435942	2	-0.195718
TMBIM4	5.05533e-56	1.50747e-54	0.97446	0.89261	0.566317	15.7255	0.628622	0.513026	6	0.141261
MAP9	6.40268e-62	2.05173e-60	0.840529	1.02198	0.512647	16.5634	0.627483	0.388842	2	-0.387823
OSBPL6	2.61103e-76	9.69316e-75	0.689514	1.23457	0.430598	18.4499	0.627352	0.388128	2	-0.372616
HSPE1	7.53591e-50	2.13827e-48	1.95652	0.348583	0.791487	14.7981	0.627217	0.515967	2	-0.0700436
DNAJA1	4.78711e-50	1.36433e-48	1.74459	0.378245	0.778532	14.8286	0.627166	0.42559	2	-0.271737
PTPRF	1.67016e-53	4.93464e-52	1.11168	0.766812	0.60765	15.3538	0.627051	0.421183	2	-0.287563
IFT88	2.55365e-65	8.58906e-64	0.771255	1.06555	0.485503	17.0278	0.627022	0.407695	2	-0.282538
C6	2.88171e-120	1.61401e-118	0.501154	1.91255	0.315854	23.2888	0.626682	0.51616	6	0.87697
LRRC71	9.00884e-68	3.0783e-66	0.749402	1.05244	0.472548	17.3552	0.626483	0.390427	2	-0.338261
CFAP57	2.91802e-70	1.02705e-68	0.702479	1.1452	0.451573	17.6814	0.626322	0.37454	2	-0.404397
KIF3A	9.71448e-65	3.24202e-63	0.708223	1.13227	0.466379	16.9494	0.625306	0.412673	2	-0.25691
RPL23	2.38875e-48	6.64619e-47	1.77326	0.331595	0.776681	14.5637	0.625087	0.4928	6	-0.136541
CCDC189	3.10473e-63	1.02028e-61	0.784814	1.04503	0.485503	16.7445	0.625043	0.414121	2	-0.230179
RABL2A	2.62467e-64	8.71417e-63	0.769219	1.12398	0.471314	16.8909	0.624772	0.407891	2	-0.232462
C4orf3	2.86355e-48	7.93296e-47	1.58953	0.386119	0.741518	14.5513	0.624583	0.458731	2	-0.204957
AK9	3.86591e-62	1.24502e-60	0.779285	1.00928	0.491055	16.5938	0.624293	0.384009	2	-0.389951
CROCC	3.82301e-62	1.23428e-60	0.827798	1.02433	0.494139	16.5944	0.623828	0.333644	2	-0.594499
CHST9	4.97598e-49	1.39047e-47	1.4006	0.536971	0.698334	14.6706	0.623541	0.388163	2	-0.363473
PARK7	1.56956e-47	4.32958e-46	1.49727	0.383708	0.718692	14.4345	0.623296	0.527273	6	-0.067203
PSMA2	1.73426e-61	5.48913e-60	0.720629	1.23032	0.458359	16.5034	0.623242	0.522908	6	0.437961
C1orf158	8.12179e-68	2.78258e-66	0.670382	1.13089	0.441086	17.3612	0.623083	0.406961	2	-0.2596
HAGHL	1.64965e-62	5.35284e-61	0.753747	1.06096	0.467613	16.6448	0.622287	0.444293	2	-0.215624
SCPEP1	2.2702e-52	6.61644e-51	0.977614	0.9484	0.53979	15.1836	0.621899	0.468219	2	-0.0472457
PSMB5	3.63672e-47	9.96771e-46	1.18404	0.568896	0.637261	14.3764	0.621412	0.536092	2	0.0735199
RAB36	6.13301e-61	1.93167e-59	0.77652	0.977705	0.481184	16.427	0.621345	0.358902	2	-0.501729
CFAP44	1.52052e-57	4.60879e-56	0.878099	0.916561	0.511413	15.9459	0.621081	0.327635	2	-0.621295
RBX1	1.59443e-45	4.21754e-44	1.43166	0.387959	0.703886	14.1123	0.620717	0.56133	2	0.0568407
SERPINB6	1.74331e-46	4.68836e-45	1.20718	0.53968	0.656385	14.2675	0.620619	0.542533	2	0.102111
NDUFB10	3.47584e-46	9.27034e-45	1.27695	0.499905	0.660703	14.2193	0.620586	0.549417	6	0.0844796
RPS10	1.06299e-46	2.87678e-45	1.32659	0.59972	0.662554	14.302	0.620246	0.427008	6	-0.250062
ATF7IP2	7.03215e-62	2.24784e-60	0.703106	1.21986	0.44232	16.5578	0.620203	0.452289	2	-0.0164009
ATP5PO	3.18926e-49	8.95078e-48	0.988764	0.834987	0.561999	14.7007	0.619967	0.508809	6	0.13221
TMEM232	9.10817e-63	2.96291e-61	0.692614	1.09723	0.442936	16.6803	0.619262	0.399593	2	-0.283645
EFHB	1.20543e-61	3.83415e-60	0.683937	0.994959	0.453424	16.5253	0.618763	0.372687	2	-0.463949
CFAP77	1.09468e-63	3.61583e-62	0.641104	1.11738	0.425046	16.8064	0.618127	0.390351	2	-0.359548
SRGAP3-AS2	3.8232e-59	1.18107e-57	0.793346	0.907761	0.478717	16.1744	0.617732	0.329457	2	-0.653506
MINOS1	3.54307e-43	9.05591e-42	1.37724	0.421553	0.698334	13.7261	0.617078	0.495567	6	-0.120594
LAMTOR4	1.90172e-43	4.88007e-42	1.23325	0.490343	0.663171	13.7711	0.616971	0.547647	6	0.100827
TUFM	1.30567e-43	3.35722e-42	1.22041	0.508083	0.650216	13.7982	0.616963	0.519849	2	-0.00771372
CCDC65	1.24136e-57	3.78044e-56	0.733216	0.957905	0.464528	15.9586	0.616487	0.350212	2	-0.540541
AK7	9.69383e-62	3.09099e-60	0.655003	1.11609	0.426897	16.5385	0.616438	0.353127	2	-0.529962
DNAH10	8.05828e-56	2.39739e-54	0.813626	0.882625	0.491672	15.696	0.616133	0.286305	2	-0.770817
BANF1	3.32081e-43	8.5047e-42	1.18875	0.548902	0.63541	13.7308	0.615943	0.500869	2	-0.0617697
DAW1	2.5061e-64	8.34202e-63	0.589663	1.23452	0.396052	16.8936	0.614956	0.406134	2	-0.228947
RPS17	1.15008e-41	2.88798e-40	1.46683	0.481374	0.693399	13.4715	0.614616	0.477565	6	-0.114338
TRAF3IP1	7.38502e-52	2.13304e-50	0.769501	0.952173	0.484269	15.1061	0.614593	0.372307	2	-0.455379
PPP1R32	1.57604e-58	4.82246e-57	0.720254	1.02441	0.439235	16.0869	0.614345	0.369359	2	-0.448786
FAM104B	1.96861e-51	5.62298e-50	0.749778	1.03638	0.473165	15.0413	0.614275	0.415873	2	-0.25379
CFDP1	4.69373e-42	1.18326e-40	1.21067	0.565887	0.641579	13.5375	0.61405	0.469044	2	-0.16112
SRSF5	8.3844e-41	2.06516e-39	1.32217	0.437239	0.697101	13.3241	0.613662	0.486617	2	-0.120817
MARCKS	1.17441e-41	2.94333e-40	1.19438	0.578934	0.640962	13.47	0.613358	0.506735	6	0.0040862
TMEM173	6.61544e-44	1.70782e-42	0.966404	0.792584	0.562616	13.8472	0.61325	0.42607	2	-0.235708
ACYP1	1.8225e-51	5.2172e-50	0.733783	1.04232	0.465762	15.0464	0.613204	0.439827	2	-0.0782502
ANKUB1	1.55369e-58	4.7654e-57	0.6829	1.05604	0.428131	16.0878	0.6131	0.343182	2	-0.568854
MRPS21	2.26571e-40	5.51737e-39	1.33581	0.410606	0.690932	13.2497	0.61297	0.494979	2	-0.115314
ATP5F1A	8.55328e-41	2.10273e-39	1.19455	0.521702	0.641579	13.3226	0.612638	0.527297	2	0.0432887
MAP1B	1.42393e-57	4.3262e-56	0.670183	1.06527	0.424429	15.95	0.612365	0.401138	2	-0.282753
RFX2	5.31833e-47	1.4515e-45	0.875852	0.785167	0.52992	14.3501	0.612297	0.346984	2	-0.560546
TP53TG1	2.55926e-44	6.64684e-43	0.872533	0.875327	0.530537	13.9152	0.612127	0.464519	2	-0.05426
COQ4	1.37941e-41	3.43705e-40	1.08403	0.629637	0.615669	13.4581	0.612096	0.413439	2	-0.324613
C1orf87	5.14599e-59	1.5859e-57	0.605667	1.06729	0.413325	16.1561	0.612047	0.370235	2	-0.446084
PEBP1	1.90908e-40	4.66656e-39	1.22912	0.508258	0.650216	13.2625	0.612017	0.445631	2	-0.239965
CCDC151	5.92758e-59	1.82241e-57	0.618862	1.14083	0.406539	16.1473	0.611886	0.424402	2	-0.116761
TMC4	2.03424e-41	5.05888e-40	1.02484	0.669796	0.594078	13.4294	0.611651	0.411491	2	-0.331562
CARS	1.31778e-44	3.42942e-43	0.935464	0.837176	0.536089	13.9626	0.611443	0.410371	2	-0.302578
SEC62	8.93302e-39	2.14293e-37	1.5302	0.335066	0.750771	12.971	0.611203	0.554138	2	0.044739
FIS1	4.71784e-39	1.13387e-37	1.28707	0.422588	0.66132	13.0198	0.610715	0.523772	6	-0.0446236
LZTFL1	1.66348e-49	4.69933e-48	0.701974	0.999162	0.459593	14.7447	0.610377	0.389119	2	-0.349786
RSPH14	1.44971e-61	4.59979e-60	0.546932	1.18524	0.380012	16.5142	0.610019	0.400734	2	-0.28362
DRC1	6.52538e-47	1.77717e-45	0.865315	0.723637	0.520049	14.3359	0.60899	0.288952	2	-0.75534
SCGB2A1	2.42533e-52	7.05262e-51	0.733045	1.2469	0.415793	15.1793	0.608572	0.458565	2	0.0728247
GCC2	1.52884e-38	3.65389e-37	1.1496	0.591626	0.631092	12.9298	0.608571	0.393886	2	-0.370492
STOX1	9.12186e-52	2.62294e-50	0.6198	1.05217	0.42628	15.0921	0.608565	0.389905	2	-0.343419
LXN	5.56363e-50	1.58214e-48	0.663311	1.20103	0.421962	14.8185	0.608052	0.45472	2	0.0457445
FBXO15	1.68195e-57	5.08611e-56	0.547301	1.15445	0.384948	15.9396	0.60775	0.392521	2	-0.321005
B9D2	2.64291e-45	6.97665e-44	0.734444	0.944586	0.471314	14.0766	0.607251	0.451772	2	-0.0532895
C5orf15	2.49901e-42	6.33707e-41	0.780546	0.994614	0.488587	13.5838	0.606965	0.462495	2	0.0230371
PPP1R14C	1.78685e-49	5.03681e-48	0.630099	1.13368	0.420111	14.7399	0.60664	0.418227	2	-0.159431
UCKL1-AS1	2.96434e-61	9.35947e-60	0.533036	1.36322	0.352869	16.471	0.606445	0.426462	2	-0.0361847
TEX26	1.59362e-59	4.94675e-58	0.636637	1.20638	0.370142	16.2282	0.606396	0.392566	2	-0.392461
HSD17B13	7.20196e-63	2.35471e-61	0.633123	1.471	0.3467	16.6944	0.606327	0.491033	2	0.279171
SEC14L3	1.27636e-66	4.33826e-65	0.522683	1.44053	0.329426	17.2023	0.605179	0.441139	2	-0.0168194
LRRC6	3.36027e-47	9.22965e-46	0.678582	0.925998	0.44417	14.3819	0.605124	0.355942	2	-0.509884
PIP	4.52063e-74	1.64042e-72	0.526917	1.67478	0.305984	18.1693	0.605065	0.50303	6	0.768611
TRMT112	3.07834e-35	7.11941e-34	1.27822	0.409782	0.673658	12.3311	0.605035	0.519809	2	-0.0310523
NDUFB7	5.44585e-35	1.25274e-33	1.41468	0.334646	0.707588	12.2851	0.605033	0.51859	6	-0.0628808
AC133794.1	7.11345e-63	2.33169e-61	0.486963	1.45092	0.333745	16.6951	0.604605	0.455133	2	0.20806
HLA-DPA1	1.64309e-35	3.8195e-34	1.32314	0.541642	0.644047	12.3816	0.603822	0.44917	2	-0.187211
KIF19	2.15077e-49	6.0494e-48	0.62664	1.04203	0.40839	14.7274	0.603601	0.376721	2	-0.369927
HACD4	6.59038e-45	1.72907e-43	0.69357	0.994891	0.440469	14.0119	0.603472	0.362671	2	-0.492657
AC078864.2	3.30099e-54	9.798e-53	0.570827	1.14307	0.373226	15.4586	0.603284	0.39291	2	-0.332683
MAPK10	1.22966e-41	3.07583e-40	0.761205	0.871779	0.479334	13.4666	0.602945	0.352742	2	-0.51785
IQCA1	1.97098e-47	5.42525e-46	0.604452	1.0771	0.410241	14.4188	0.602873	0.408207	2	-0.227339
PPOX	9.77776e-46	2.59171e-44	0.663075	1.05589	0.423812	14.1468	0.602828	0.376618	2	-0.379666
UCP2	2.12072e-34	4.81818e-33	1.32676	0.449783	0.675509	12.1747	0.602818	0.43615	6	-0.257731
IQCK	2.89473e-41	7.18494e-40	0.734213	0.902609	0.470697	13.4032	0.602366	0.395377	2	-0.333238
BLOC1S1	1.7825e-34	4.05691e-33	1.08295	0.525719	0.608883	12.1888	0.602336	0.488331	6	-0.0713389
AC105446.1	9.3683e-53	2.75531e-51	0.657434	1.16074	0.376928	15.2416	0.602202	0.451577	2	-0.0160004
SPCS1	2.50601e-33	5.63394e-32	1.36298	0.348261	0.689698	11.9715	0.602124	0.500402	6	-0.116858
VSTM2L	8.7068e-41	2.1364e-39	0.747591	0.940291	0.467613	13.3213	0.602007	0.405065	2	-0.289603
CCDC187	5.26815e-44	1.36274e-42	0.774156	0.839528	0.46021	13.8635	0.601955	0.295361	2	-0.75395
PRDX6	2.29658e-33	5.18117e-32	1.29761	0.387594	0.673658	11.9787	0.60187	0.517208	6	-0.0367038
CCDC190	1.06707e-42	2.71125e-41	0.770086	0.771522	0.476866	13.6459	0.601716	0.297732	2	-0.749304
KNDC1	1.66891e-52	4.88612e-51	0.560264	1.2585	0.362122	15.2038	0.600914	0.407337	2	-0.0646061
SQLE	1.05135e-38	2.51737e-37	0.793978	0.931701	0.475632	12.9585	0.600695	0.456475	2	-0.00204597
N4BP2L2	6.0597e-33	1.3482e-31	1.14986	0.570688	0.621221	11.898	0.600319	0.529007	2	0.162583
PLEKHB1	5.0168e-47	1.37211e-45	0.567698	1.11244	0.389266	14.3542	0.600207	0.401039	2	-0.267837
IFT81	7.02173e-42	1.76668e-40	0.676243	0.973815	0.438618	13.5079	0.600088	0.374907	2	-0.418871

## Sheet: Cl06
geneID	pval	fdr	meanExp	logR	expT	rsZ	auc	subMinAuc	subMinIdx	maxLogR
BPIFB1	3.97353e-113	9.03184e-110	5.38038	1.29692	0.99005	22.5732	0.829206	0.524196	3	0.106524
SCGB3A1	1.19881e-89	9.08298e-87	6.38861	0.996435	0.992537	20.0414	0.797484	0.530987	3	0.10867
C3	3.48217e-107	5.54049e-104	1.30009	1.26997	0.873134	21.9599	0.778544	0.456761	3	-0.158171
SCGB1A1	9.53332e-78	5.05615e-75	7.29581	0.887825	0.970149	18.628	0.776111	0.535861	3	0.129604
MUC5B	1.61673e-133	1.28619e-129	1.63476	1.69806	0.743781	24.5618	0.77543	0.531665	3	0.0624517
MUC5AC	1.47843e-102	1.80949e-99	2.98534	1.52022	0.818408	21.4702	0.774778	0.535743	3	0.115896
LCN2	9.11964e-77	4.39705e-74	4.04404	0.950773	0.972637	18.5067	0.772472	0.420185	3	-0.140493
PIGR	4.03996e-75	1.73729e-72	3.06938	0.814208	0.987562	18.3013	0.770526	0.471058	3	-0.00391647
TSPAN8	3.87405e-111	7.70501e-108	1.22918	1.33597	0.803483	22.3698	0.770073	0.434535	3	-0.299812
CYP2F1	1.89704e-100	2.15598e-97	1.59013	1.22944	0.875622	21.2434	0.765269	0.300106	3	-0.485125
MSMB	1.57239e-76	7.35832e-74	3.801	1.29767	0.858209	18.4773	0.760237	0.506355	3	0.0413665
CDC42EP5	1.60661e-109	2.84031e-106	0.675775	1.28646	0.738806	22.203	0.755867	0.494674	3	-0.0727142
LYZ	1.2441e-77	6.38546e-75	1.13455	0.962643	0.878109	18.6137	0.745258	0.599433	3	0.291276
CCNO	1.49463e-75	6.7946e-73	1.52491	1.53963	0.813433	18.3554	0.742253	0.635339	3	0.753132
C12orf57	2.57547e-63	5.93889e-61	1.35988	0.840383	0.967662	16.7556	0.741021	0.57784	3	0.2215
TFF3	9.01363e-57	1.39239e-54	3.81623	0.87371	0.960199	15.8344	0.734977	0.584562	3	0.273128
CXCL6	7.89762e-91	6.28295e-88	0.908373	1.06477	0.738806	20.1764	0.734596	0.395406	3	-0.558422
LRRC26	4.17159e-124	1.65936e-120	0.604535	1.56556	0.599502	23.6646	0.732047	0.668183	3	1.03742
CLDN10	1.91288e-106	2.76689e-103	0.463891	1.07055	0.661692	21.8824	0.730442	0.476947	3	-0.29882
CDK2AP2	7.00889e-62	1.46735e-59	1.1825	1.10006	0.880597	16.558	0.729455	0.596799	3	0.535451
NR4A1	9.01691e-83	5.73872e-80	0.800388	1.02566	0.743781	19.2373	0.729226	0.48289	3	-0.186955
OAT	3.73967e-65	1.00851e-62	0.853454	0.885106	0.870647	17.0055	0.728146	0.469121	3	-0.0939964
KLK11	1.34931e-72	4.99275e-70	0.981596	0.979944	0.80597	17.9819	0.725585	0.340535	3	-0.494562
WFDC2	1.62606e-51	1.79669e-49	5.52075	0.44438	0.992537	15.054	0.725546	0.329321	3	-0.161781
KIAA1324	2.08706e-78	1.14508e-75	0.544854	0.91785	0.746269	18.7091	0.724876	0.458554	3	-0.250391
LYPD2	1.52914e-79	9.01119e-77	1.70931	1.14778	0.726368	18.8479	0.72469	0.477558	3	-0.274305
SLPI	1.67626e-50	1.7432e-48	6.59305	0.338429	0.995025	14.8989	0.723276	0.355412	3	-0.142201
FAM3D	6.64091e-66	1.95673e-63	1.18487	0.956756	0.833333	17.1065	0.722964	0.298108	3	-0.543226
FOS	3.13497e-56	4.45362e-54	2.09983	0.844827	0.952736	15.7558	0.722366	0.433263	3	-0.124396
RPL3	2.40809e-49	2.29432e-47	3.4242	0.413904	1	14.7197	0.720409	0.466968	3	-0.030356
CRACR2B	2.78793e-61	5.4764e-59	0.77469	0.754287	0.895522	16.4747	0.720318	0.395339	3	-0.307358
VMO1	1.74266e-61	3.46593e-59	1.40053	0.832181	0.875622	16.5031	0.719123	0.339473	3	-0.540918
SLC31A1	1.33357e-65	3.789e-63	0.590468	0.838632	0.791045	17.0658	0.717319	0.450403	3	-0.242983
CCDC74A	1.61238e-59	2.88254e-57	1.1586	0.884018	0.88806	16.2275	0.715828	0.398853	2	-0.192442
MZT2B	3.25865e-50	3.32361e-48	1.16732	0.732636	0.927861	14.8544	0.713401	0.633062	5	0.381997
EGR1	5.69795e-64	1.37364e-61	1.10155	0.941878	0.773632	16.8451	0.713222	0.529428	3	-0.139017
CXCL1	2.01851e-64	4.94101e-62	1.32681	1.00696	0.756219	16.9064	0.712939	0.405359	3	-0.395336
CTXN1	1.42776e-58	2.41671e-56	1.00897	0.806917	0.88806	16.093	0.712856	0.361426	2	-0.353478
PRSS23	1.32562e-50	1.38763e-48	2.20596	0.825098	0.950249	14.9145	0.711724	0.199785	3	-0.521794
MDK	3.06426e-48	2.77019e-46	1.96356	0.762675	0.957711	14.5467	0.709705	0.316814	3	-0.376655
AQP5	2.95795e-56	4.23999e-54	1.59544	0.731834	0.890547	15.7594	0.709276	0.216476	3	-0.815521
MSLN	7.84125e-65	2.01229e-62	0.868931	0.906074	0.743781	16.962	0.709036	0.443816	3	-0.309334
TGM2	6.47369e-62	1.37337e-59	0.782679	0.96043	0.723881	16.5628	0.707895	0.471979	3	-0.189941
TMED3	2.8617e-56	4.13933e-54	0.719669	0.797996	0.813433	15.7615	0.706895	0.405669	3	-0.325503
RANBP1	1.4331e-48	1.31803e-46	1.0756	0.817178	0.890547	14.5986	0.706797	0.659334	5	0.614324
RPS4X	2.22248e-43	1.42015e-41	3.70744	0.351274	0.997512	13.7598	0.706109	0.469189	3	-0.00931824
CCDC34	3.32113e-60	6.07385e-58	0.659034	0.780218	0.776119	16.3242	0.7046	0.496401	2	0.0944119
MZT2A	7.86094e-55	1.01687e-52	0.645009	0.807118	0.788557	15.5508	0.703664	0.585156	3	0.333658
NPDC1	3.74876e-68	1.21728e-65	0.467826	0.833114	0.68408	17.4055	0.702742	0.400823	3	-0.46669
RPS10	6.27959e-44	4.19809e-42	1.59659	0.704125	0.952736	13.8509	0.702188	0.572992	5	0.250062
ZG16B	1.02195e-69	3.61339e-67	0.515632	0.883463	0.659204	17.6106	0.702071	0.459664	3	-0.310736
SLC12A2	4.50009e-66	1.35096e-63	0.431382	0.798376	0.676617	17.1291	0.700737	0.494335	3	-0.142456
CBY1	4.83089e-56	6.74249e-54	0.655012	0.786839	0.768657	15.7284	0.700085	0.493004	2	0.0556977
SELENOM	3.98381e-54	4.83866e-52	0.677976	0.814276	0.761194	15.4465	0.69978	0.513327	3	-0.00863256
CCDC74B	5.08024e-58	8.24813e-56	0.681493	0.702873	0.791045	16.0143	0.698565	0.345706	2	-0.465415
MARCKSL1	6.96169e-63	1.53844e-60	0.616217	0.885109	0.68408	16.6964	0.698344	0.501108	3	-0.0334606
NENF	3.23669e-45	2.56214e-43	0.999407	0.699961	0.91791	14.0623	0.6983	0.468849	3	-0.0556034
PAM	1.07524e-61	2.19335e-59	0.54729	0.937393	0.669154	16.5322	0.698263	0.482684	3	-0.125961
BPIFA1	6.45472e-68	2.05402e-65	1.60155	1.24782	0.629353	17.3743	0.697993	0.517236	3	-0.168164
CXXC5	2.65199e-55	3.51632e-53	0.550942	0.780543	0.736318	15.6202	0.697613	0.614581	2	0.420737
NR4A2	1.70291e-56	2.53224e-54	0.559017	0.808723	0.718905	15.7943	0.696966	0.580514	2	0.333661
C16orf89	2.07632e-63	4.85829e-61	0.712159	1.07273	0.636816	16.7684	0.696657	0.543502	3	0.0582695
MAZ	5.58741e-49	5.29174e-47	0.69894	0.789996	0.783582	14.6627	0.694275	0.505019	2	0.100652
AKR7A2	1.47713e-45	1.18103e-43	0.840134	0.711602	0.855721	14.1177	0.694219	0.530643	2	0.169362
TCEA3	2.31294e-60	4.32954e-58	0.482716	0.7821	0.681592	16.3462	0.693261	0.374659	3	-0.540065
MUC1	2.63274e-39	1.19004e-37	2.08586	0.649502	0.987562	13.0643	0.692994	0.505091	3	0.0598447
YIPF2	1.37084e-54	1.70402e-52	0.467145	0.769264	0.711443	15.5151	0.692674	0.540296	3	0.122751
EPAS1	1.50187e-55	2.0251e-53	0.657579	0.665871	0.723881	15.6564	0.692169	0.330883	3	-0.811894
GALNT6	4.20434e-65	1.09664e-62	0.434253	0.87425	0.621891	16.9986	0.692016	0.500605	3	-0.140952
C1orf122	5.35149e-52	6.08197e-50	0.521093	0.734693	0.731343	15.1273	0.691243	0.504805	3	-0.032132
SSR2	2.51023e-44	1.78305e-42	0.820571	0.652852	0.868159	13.9166	0.691243	0.447814	3	-0.194555
SERPINB11	7.38439e-64	1.75363e-61	0.698062	0.909452	0.631841	16.8298	0.69098	0.39879	3	-0.59845
RAB36	1.91786e-50	1.98149e-48	0.759791	0.630494	0.830846	14.8899	0.690967	0.31287	2	-0.52953
IDH2	5.25178e-43	3.22629e-41	0.906438	0.710024	0.870647	13.6975	0.690777	0.486376	2	0.0227454
CTSC	2.6366e-44	1.86448e-42	1.27619	0.715994	0.870647	13.9131	0.690672	0.26598	3	-0.613173
AC234582.1	9.59454e-57	1.46787e-54	0.585417	0.691708	0.71393	15.8304	0.690573	0.461585	2	-0.0737182
ISOC2	5.64545e-50	5.68511e-48	0.532538	0.686919	0.763682	14.8175	0.690408	0.530089	3	0.0886661
ZCRB1	3.07281e-43	1.94014e-41	0.754202	0.630887	0.875622	13.7364	0.690089	0.516459	2	0.0589198
RPS3A	7.80432e-37	2.87441e-35	3.35623	0.340931	1	12.6238	0.689074	0.529149	3	0.0599842
AGR2	4.12677e-37	1.56709e-35	3.57295	0.540344	0.952736	12.6739	0.68903	0.363753	3	-0.266678
FOSB	2.65326e-51	2.91145e-49	1.04756	0.812763	0.736318	15.0215	0.688858	0.443344	3	-0.321965
PRADC1	1.39936e-69	4.84027e-67	0.390319	1.10562	0.557214	17.5928	0.687824	0.608054	3	0.65473
CARHSP1	5.67627e-42	3.29617e-40	0.931895	0.759346	0.853234	13.5236	0.6878	0.642233	3	0.596942
SSRP1	7.45401e-47	6.30855e-45	0.595077	0.707107	0.771144	14.3267	0.68774	0.531325	2	0.172996
MYB	3.91703e-62	8.53751e-60	0.507243	0.898657	0.626866	16.593	0.687326	0.48976	2	0.120473
H2AFV	8.45884e-39	3.69749e-37	1.14342	0.682388	0.925373	12.9752	0.687132	0.589376	2	0.323447
CHP2	3.15597e-73	1.28755e-70	0.341948	0.858295	0.567164	18.0623	0.686409	0.41036	3	-0.567601
CISD2	1.99894e-48	1.81744e-46	0.527602	0.737839	0.731343	14.5759	0.686143	0.586696	3	0.343516
HACD3	2.67946e-44	1.88641e-42	0.659606	0.630823	0.810945	13.912	0.686046	0.506363	2	0.0277017
LSM5	1.47919e-39	6.90188e-38	0.933221	0.635257	0.900498	13.1081	0.685962	0.577276	2	0.270715
S100P	1.32178e-37	5.20567e-36	2.62376	0.702844	0.910448	12.7628	0.685098	0.282576	3	-0.420182
CP	4.61754e-41	2.44899e-39	1.05588	0.668985	0.868159	13.3685	0.684876	0.367581	3	-0.400038
ST6GAL1	4.92948e-47	4.19428e-45	0.610129	0.699302	0.743781	14.3554	0.684854	0.437453	3	-0.315568
UCP2	1.09995e-36	3.98664e-35	1.60582	0.609756	0.972637	12.5968	0.684703	0.538503	2	0.0839174
TMEM125	9.98865e-42	5.61588e-40	0.680347	0.596694	0.845771	13.4819	0.684303	0.5696	3	0.158489
SLC2A10	3.42264e-50	3.46864e-48	0.45322	0.604434	0.708955	14.8511	0.683712	0.580944	2	0.120099
CALM3	4.04666e-38	1.68551e-36	0.987564	0.641515	0.90796	12.8547	0.683096	0.58761	2	0.308387
CEP41	4.8025e-56	6.74249e-54	0.49042	0.822307	0.639303	15.7288	0.682409	0.474998	2	0.0313521
CCDC96	1.94611e-52	2.24381e-50	0.473976	0.562621	0.706468	15.1937	0.681672	0.364246	2	-0.488662
RPL27A	4.37458e-34	1.24515e-32	2.92995	0.460436	0.987562	12.1154	0.681234	0.575703	5	0.148854
DAG1	1.49154e-52	1.74499e-50	0.387697	0.673182	0.654229	15.2111	0.681209	0.523532	2	0.0633978
RPS3	6.72667e-34	1.87768e-32	3.30678	0.355206	0.997512	12.0801	0.680904	0.345202	3	-0.131563
HES6	1.90487e-84	1.26285e-81	0.558968	1.62899	0.482587	19.4363	0.680878	0.634616	1	0.605689
TAF10	2.2677e-44	1.62529e-42	0.551496	0.726396	0.728856	13.9239	0.680503	0.60618	2	0.418415
HMGB3	3.68173e-43	2.29725e-41	0.689051	0.633199	0.778607	13.7233	0.680318	0.545901	3	0.0949159
CHD3	1.10377e-50	1.16306e-48	0.426038	0.684257	0.669154	14.9268	0.680053	0.518112	3	-0.0160781
MUC12	4.77642e-62	1.027e-59	0.610319	0.974583	0.58209	16.5811	0.680018	0.526267	2	0.176602
TMEM14B	4.72238e-35	1.49083e-33	1.31415	0.597594	0.957711	12.2966	0.679835	0.467476	2	-0.0228364
FOXN3	3.24583e-51	3.53729e-49	0.418462	0.678092	0.664179	15.0082	0.679782	0.426821	3	-0.390284
SCNN1B	1.34123e-61	2.7013e-59	0.370607	0.753895	0.584577	16.5189	0.679522	0.416733	3	-0.503202
VSIG2	8.83355e-46	7.13455e-44	0.645436	0.669676	0.736318	14.1539	0.678937	0.374201	3	-0.50332
ERCC1	3.81624e-39	1.71526e-37	0.789953	0.652704	0.840796	13.036	0.678505	0.419396	2	-0.184148
RPSA	4.14384e-33	1.03831e-31	2.91457	0.388814	0.99005	11.9297	0.678481	0.458281	3	-0.0276523
CTDNEP1	1.18147e-43	7.76792e-42	0.485959	0.578883	0.753731	13.8054	0.678444	0.558891	2	0.197276
BBIP1	8.88872e-42	5.05102e-40	0.617251	0.57645	0.793532	13.4905	0.678241	0.420991	2	-0.22826
RPL7	6.30081e-33	1.5543e-31	2.95116	0.427228	0.99005	11.8948	0.67795	0.56517	3	0.108149
AC007906.2	4.47655e-37	1.68384e-35	1.59185	0.663109	0.937811	12.6675	0.677427	0.267515	2	-0.514174
RNF5	1.77494e-42	1.04597e-40	0.513606	0.5948	0.753731	13.6088	0.676714	0.529317	2	0.111386
RILPL2	1.11118e-44	8.41906e-43	0.469392	0.654469	0.70398	13.9748	0.676548	0.534285	2	0.151616
FOXJ1	1.41581e-35	4.71275e-34	1.98626	0.715747	0.962687	12.3936	0.676481	0.372691	2	-0.202693
BAD	2.65659e-38	1.11823e-36	0.684508	0.552044	0.840796	12.8872	0.676448	0.549134	1	-0.278139
B9D2	8.81442e-41	4.53871e-39	0.679389	0.531151	0.81592	13.3203	0.676207	0.444991	2	-0.151761
SLC4A4	3.61408e-65	9.91441e-63	0.330056	0.757443	0.554726	17.0075	0.676074	0.404925	3	-0.627382
STOML2	3.13579e-36	1.10453e-34	0.818167	0.588236	0.878109	12.5138	0.67604	0.601683	2	0.305535
PAQR4	2.86208e-71	1.03497e-68	0.425336	1.12876	0.504975	17.8118	0.676016	0.575888	3	0.393913
ORAI2	1.43418e-49	1.39142e-47	0.441186	0.548504	0.681592	14.7547	0.675731	0.416705	2	-0.336729
BRD3OS	2.79324e-58	4.67823e-56	0.348815	0.656163	0.594527	16.0514	0.675361	0.420578	2	-0.344342
AC004832.1	7.41517e-40	3.53242e-38	0.908568	0.607301	0.848259	13.1604	0.675329	0.349299	2	-0.391331
ST6GALNAC1	1.04397e-36	3.80976e-35	0.883761	0.633992	0.860697	12.6009	0.675223	0.441338	3	-0.157323
ENKD1	4.56857e-47	3.90809e-45	0.499833	0.544437	0.708955	14.3606	0.675211	0.382632	2	-0.422987
ALKBH7	2.61376e-36	9.28294e-35	0.7899	0.58324	0.875622	12.5283	0.675022	0.51528	3	0.036196
H2AFZ	2.81536e-33	7.15577e-32	1.45009	0.680505	0.937811	11.9618	0.67496	0.599391	3	0.400991
SLFN11	3.13226e-80	1.91682e-77	0.339175	1.06711	0.4801	18.9316	0.674846	0.60513	2	0.73147
SORL1	5.6758e-53	6.68946e-51	0.38418	0.675774	0.61194	15.2743	0.674448	0.483398	3	-0.249504
NAP1L1	1.83597e-32	4.30856e-31	1.68357	0.566636	0.965174	11.8051	0.674411	0.486972	5	0.0486952
ORAI1	3.69865e-55	4.86357e-53	0.319679	0.686199	0.59204	15.599	0.674298	0.589497	2	0.380063
TUBA1B	3.92102e-32	8.82423e-31	1.86827	0.577502	0.977612	11.7411	0.674102	0.587438	5	0.368987
TFDP1	2.74829e-47	2.38951e-45	0.406929	0.658642	0.649254	14.3958	0.673955	0.554943	2	0.228188
CREB3L1	2.32206e-50	2.38363e-48	0.505888	0.723004	0.639303	14.8771	0.673908	0.317371	3	-0.776174
PITPNA	3.99564e-45	3.14726e-43	0.425767	0.607494	0.68408	14.0474	0.673906	0.473591	2	-0.139302
CEP78	2.93142e-65	8.18278e-63	0.409054	1.01303	0.524876	17.0197	0.6739	0.563339	2	0.525141
CFAP20	2.03275e-41	1.12302e-39	0.585312	0.540933	0.768657	13.4294	0.673638	0.418433	2	-0.24861
RIBC1	4.01316e-43	2.49427e-41	0.601203	0.473003	0.783582	13.7171	0.673445	0.396348	2	-0.342767
CRYM	6.98657e-67	2.17967e-64	0.338433	0.926463	0.517413	17.2372	0.673428	0.495381	3	-0.202156
TM7SF3	7.94215e-49	7.43338e-47	0.506444	0.960178	0.606965	14.6388	0.673115	0.595032	2	0.638994
LINC02166	4.73442e-51	5.05566e-49	0.447878	0.548718	0.656716	14.9831	0.672757	0.328995	2	-0.676983
KDELC2	4.37387e-104	5.79938e-101	0.37972	1.59701	0.420398	21.6332	0.67274	0.633875	3	1.07012
LSM1	2.36068e-41	1.2952e-39	0.457652	0.574689	0.733831	13.4183	0.672318	0.607512	2	0.38661
TMEM160	4.39116e-37	1.65564e-35	0.620955	0.531976	0.823383	12.669	0.672225	0.600031	3	0.31054
CFAP36	6.03359e-37	2.24825e-35	0.831811	0.602515	0.828358	12.6441	0.672056	0.365184	2	-0.352826
BCL7C	1.3143e-54	1.6466e-52	0.320077	0.741254	0.577114	15.5178	0.671916	0.581993	3	0.342131
NHP2	7.40225e-35	2.28694e-33	0.816038	0.560011	0.890547	12.2602	0.671907	0.540343	3	0.134148
AC084033.3	5.48189e-38	2.25381e-36	0.938769	0.555642	0.873134	12.8312	0.671636	0.341796	2	-0.375339
DUS1L	9.53471e-45	7.2936e-43	0.403725	0.613126	0.666667	13.9857	0.671522	0.563375	2	0.223877
IFT22	3.58691e-34	1.03203e-32	1.24066	0.623397	0.915423	12.1317	0.67145	0.370929	2	-0.262556
PNPLA4	1.77674e-48	1.6247e-46	0.362333	0.596614	0.631841	14.5839	0.67142	0.623509	2	0.214571
ECI1	1.03817e-42	6.30469e-41	0.467268	0.560543	0.701493	13.648	0.671309	0.608867	2	0.162916
PKIG	4.88718e-40	2.37798e-38	0.634264	0.517346	0.791045	13.1919	0.671248	0.344573	2	-0.456829
MLEC	3.85292e-35	1.22608e-33	0.759625	0.575142	0.853234	12.313	0.671221	0.495013	2	-0.0055493
BACE2	5.01314e-35	1.57637e-33	0.836455	0.582908	0.855721	12.2918	0.670617	0.446362	3	-0.171059
MB	2.64349e-47	2.31102e-45	0.432176	0.669499	0.631841	14.3985	0.670519	0.551571	2	0.175626
COPRS	5.89542e-34	1.65144e-32	1.03174	0.538684	0.905473	12.091	0.670357	0.425988	5	-0.264662
ATP12A	1.0677e-55	1.4645e-53	0.468445	0.813891	0.564677	15.6781	0.670328	0.403979	3	-0.608808
TPPP3	4.96333e-31	9.92105e-30	3.35474	0.622901	0.997512	11.5245	0.670147	0.272799	5	-0.262378
PSIP1	9.62346e-42	5.42974e-40	0.593945	0.744147	0.699005	13.4847	0.670055	0.428857	2	-0.1139
CTSZ	5.63241e-40	2.71568e-38	0.527811	0.527229	0.726368	13.1812	0.670029	0.609706	2	0.372067
ADAM15	5.65294e-36	1.95106e-34	0.773363	0.668897	0.798507	12.467	0.670013	0.545886	3	0.22446
POLD2	1.9147e-35	6.26846e-34	0.714315	0.538562	0.825871	12.3693	0.66948	0.522534	2	0.0672273
SPATA33	9.00813e-38	3.60416e-36	0.712657	0.499491	0.823383	12.7927	0.669317	0.391707	2	-0.291825
CPD	4.87188e-34	1.3793e-32	0.748801	0.502844	0.890547	12.1066	0.669245	0.549241	3	0.088383
ACTN1	1.76711e-39	8.14972e-38	0.535022	0.570277	0.736318	13.0946	0.669177	0.476268	2	-0.0257106
PNMA1	1.56796e-45	1.24739e-43	0.473587	0.651665	0.649254	14.1135	0.669103	0.399847	2	-0.349787
IRS2	5.7226e-44	3.85815e-42	0.507207	0.679738	0.651741	13.8576	0.669002	0.520333	3	-0.00205525
SMIM31	3.30308e-44	2.30506e-42	0.426158	0.637244	0.659204	13.897	0.668838	0.426603	3	-0.353342
DGCR6L	9.53122e-38	3.80078e-36	0.543908	0.553631	0.753731	12.7883	0.668687	0.554183	2	0.188071
RAMP1	4.10601e-40	2.01018e-38	0.651494	0.537432	0.743781	13.205	0.668523	0.543891	5	-0.125587
AP2B1	1.61434e-37	6.29553e-36	0.670495	0.693552	0.748756	12.7473	0.668467	0.54688	2	0.309292
SURF1	3.21731e-35	1.02999e-33	0.630494	0.54128	0.808458	12.3276	0.668381	0.604138	2	0.340478
WBP11	5.54832e-40	2.68728e-38	0.513956	0.675238	0.69403	13.1823	0.668289	0.502292	2	0.0548099
REXO2	2.71982e-34	7.94037e-33	0.700513	0.551181	0.833333	12.1543	0.668021	0.589742	2	0.292198
STARD10	6.91125e-33	1.69177e-31	1.00965	0.617482	0.833333	11.887	0.668017	0.456891	3	-0.141359
UBE2M	2.45572e-44	1.75215e-42	0.375465	0.590999	0.656716	13.9182	0.667962	0.563523	2	0.224611
TSR3	1.21038e-43	7.92522e-42	0.370116	0.568915	0.659204	13.8037	0.667776	0.594572	3	0.330237
NOP56	4.3652e-37	1.64976e-35	0.602389	0.554706	0.763682	12.6695	0.667393	0.575091	2	0.217678
FOLR1	4.97575e-43	3.06857e-41	0.683434	0.819847	0.631841	13.7015	0.667238	0.565977	3	0.165549
SNRPF	9.99247e-32	2.15726e-30	0.976189	0.55669	0.91791	11.6618	0.667187	0.620512	3	0.393366
TXNL4A	1.80399e-33	4.7287e-32	0.73154	0.530984	0.860697	11.9987	0.666969	0.605394	3	0.339726
C9orf16	7.29969e-31	1.43567e-29	1.23504	0.557219	0.950249	11.4912	0.666912	0.453101	3	-0.0535343
RACK1	3.2954e-29	5.51928e-28	2.63632	0.376808	0.995025	11.1574	0.666875	0.418189	3	-0.0510457
ERG28	1.64998e-39	7.65389e-38	0.472458	0.595051	0.708955	13.0998	0.666844	0.556817	3	0.182518
MPC2	3.14883e-31	6.46465e-30	1.098	0.548964	0.910448	11.5636	0.666819	0.459218	2	-0.0839643
TMEM205	4.10496e-34	1.17471e-32	0.803996	0.561434	0.823383	12.1207	0.666778	0.412048	3	-0.293298
DNAL4	1.71653e-44	1.24711e-42	0.418424	0.561448	0.646766	13.9438	0.66665	0.445016	2	-0.272279
HNRNPAB	1.58634e-34	4.76231e-33	0.721064	0.618648	0.813433	12.1983	0.666527	0.541169	3	0.178453
NDUFAF8	1.31773e-33	3.55361e-32	0.702008	0.502464	0.843284	12.0247	0.666479	0.594191	2	0.179895
SNF8	3.4572e-34	9.98321e-33	0.641089	0.529031	0.830846	12.1347	0.666334	0.607477	3	0.364844
LZTFL1	8.51072e-38	3.43691e-36	0.619391	0.498379	0.783582	12.7971	0.666324	0.323508	2	-0.506565
TPGS2	3.19476e-36	1.12212e-34	0.61597	0.623917	0.746269	12.5124	0.666091	0.507904	2	0.0696196
TMCO3	1.6088e-38	6.84428e-37	0.462813	0.475753	0.736318	12.9258	0.666047	0.562807	2	0.207716
SEC61A1	1.16883e-35	3.92348e-34	0.598938	0.521686	0.793532	12.4089	0.665987	0.490124	3	-0.104859
C7orf50	8.9549e-36	3.02508e-34	0.536302	0.487298	0.791045	12.4302	0.665876	0.548818	2	0.0348226
ADGRE5	1.53162e-37	6.00235e-36	0.651295	0.672066	0.71393	12.7514	0.665854	0.495491	2	0.0259689
TMX2	3.79671e-41	2.03399e-39	0.411664	0.640868	0.664179	13.3831	0.665552	0.585211	3	0.349374
TMEM230	2.75659e-33	7.01762e-32	0.67496	0.522294	0.848259	11.9636	0.665415	0.540716	3	0.097227
VPS51	2.72438e-41	1.48451e-39	0.403267	0.566079	0.664179	13.4077	0.665366	0.57741	2	0.339439
SRSF9	2.23254e-30	4.16924e-29	1.07065	0.52658	0.937811	11.3943	0.665354	0.606935	3	0.2863
STRBP	1.05883e-34	3.2336e-33	0.7091	0.518452	0.808458	12.2312	0.665323	0.42111	2	-0.202476
FTO	8.10252e-46	6.57751e-44	0.469165	0.628675	0.616915	14.16	0.665106	0.419945	2	-0.41657
KLHDC9	5.25908e-41	2.77077e-39	0.510859	0.514528	0.708955	13.3588	0.66509	0.39091	2	-0.378168
SNRNP25	3.56984e-40	1.76946e-38	0.422101	0.54737	0.68408	13.2155	0.664962	0.552141	2	0.136713
LSM3	2.39341e-31	4.97147e-30	0.853487	0.52106	0.873134	11.5872	0.664898	0.590122	5	0.235905
DNAL1	6.68204e-36	2.29133e-34	0.731613	0.480122	0.823383	12.4536	0.66483	0.348977	2	-0.433053
PTRHD1	2.08811e-33	5.43763e-32	0.669751	0.519788	0.828358	11.9866	0.664605	0.513737	2	0.0595257
SMAP2	9.06507e-42	5.13289e-40	0.408221	0.531519	0.669154	13.4891	0.664508	0.406953	2	-0.350447
MAP1A	8.84576e-39	3.85602e-37	0.656373	0.438444	0.78607	12.9718	0.664451	0.230579	2	-0.832945
FKBP11	6.38848e-42	3.68287e-40	0.489175	0.633627	0.636816	13.5149	0.664335	0.492112	3	-0.204094
RANBP9	3.83323e-51	4.12098e-49	0.365857	0.903423	0.542289	14.9971	0.664215	0.582658	2	0.568369
TMEM45A	2.6162e-92	2.19086e-89	0.36316	1.23802	0.41791	20.3441	0.66414	0.542862	3	0.0106343
DUT	1.61636e-33	4.29197e-32	0.664564	0.51533	0.828358	12.0078	0.664134	0.478198	3	-0.0817857
TNFAIP8L1	2.37281e-34	6.99144e-33	0.970393	0.526362	0.890547	12.1655	0.66386	0.288657	2	-0.50429
CNPY2	3.15502e-35	1.01209e-33	0.570538	0.54439	0.756219	12.3292	0.663831	0.550345	3	0.127222
RPL10A	3.95651e-28	5.90544e-27	2.91452	0.342195	0.995025	10.9342	0.663675	0.507104	3	0.0502936
GNAQ	7.80416e-32	1.70566e-30	0.745405	0.492904	0.860697	11.6828	0.663649	0.543033	2	0.111095
KIF3B	2.69252e-34	7.87512e-33	0.651297	0.48014	0.820896	12.1552	0.663331	0.280983	2	-0.636325
UBXN6	2.63071e-41	1.43839e-39	0.364666	0.52909	0.654229	13.4103	0.663203	0.530776	2	0.0844478
GFM2	4.35938e-40	2.12767e-38	0.416933	0.456632	0.69403	13.2005	0.663165	0.406855	2	-0.340676
ECE1	6.30312e-38	2.57151e-36	0.497861	0.55441	0.701493	12.8204	0.663091	0.427258	3	-0.359575
DDAH1	6.44703e-39	2.84941e-37	0.448959	0.508554	0.691542	12.996	0.663065	0.484203	2	-0.067058
SMIM20	3.35655e-40	1.66894e-38	0.381834	0.559007	0.661692	13.2201	0.663052	0.574419	3	0.225071
EIF3L	2.51727e-32	5.79629e-31	0.700352	0.505591	0.843284	11.7786	0.663041	0.535488	3	0.0885853
TTC26	2.72063e-43	1.73152e-41	0.435621	0.483893	0.661692	13.7452	0.662704	0.339138	2	-0.567475
EIF4EBP2	7.02855e-37	2.60073e-35	0.473066	0.5443	0.721393	12.632	0.662663	0.561667	3	0.204566
CHMP4A	1.52087e-42	8.99572e-41	0.385197	0.553004	0.629353	13.6201	0.662519	0.633792	5	0.228396
MBTPS1	1.5114e-34	4.55452e-33	0.546736	0.512367	0.766169	12.2023	0.662271	0.479637	2	-0.0550848
NPHP1	3.08221e-34	8.96546e-33	0.810046	0.493077	0.845771	12.1441	0.662201	0.29853	2	-0.512948
THOC7	1.73721e-31	3.67075e-30	0.763959	0.574044	0.840796	11.6146	0.662132	0.565855	2	0.29036
FGFR1OP	3.41068e-44	2.36975e-42	0.407909	0.620157	0.61194	13.8947	0.662096	0.432239	2	-0.228503
CCP110	7.947e-36	2.69605e-34	0.642084	0.487271	0.781095	12.4398	0.662091	0.317254	2	-0.532761
FZD3	6.49162e-50	6.49612e-48	0.293433	0.588257	0.559701	14.8081	0.661672	0.514422	2	0.0219497
NR2F6	2.63424e-34	7.71886e-33	0.561827	0.558366	0.738806	12.157	0.661648	0.558074	2	0.176843
TSPYL1	2.61759e-33	6.68515e-32	0.563015	0.464484	0.80597	11.9679	0.661464	0.488533	2	-0.0283558
TMEM231	2.09984e-32	4.89891e-31	1.12954	0.539057	0.912935	11.7938	0.661428	0.198905	2	-0.692182
UGT2A1	4.96492e-54	5.98461e-52	0.383743	0.78863	0.522388	15.4323	0.661307	0.420611	3	-0.572619
VMA21	2.04285e-41	1.1247e-39	0.358048	0.539252	0.629353	13.4291	0.661085	0.556072	2	0.215455
ADI1	1.64598e-34	4.93204e-33	0.568774	0.539045	0.763682	12.1953	0.661063	0.396827	3	-0.371039
STXBP6	2.22399e-59	3.93177e-57	0.266048	0.801085	0.495025	16.2077	0.661026	0.431618	3	-0.456158
SYS1	9.56718e-41	4.89464e-39	0.39176	0.57511	0.636816	13.3142	0.661026	0.48829	2	-0.0459577
KPNA6	2.25658e-35	7.32745e-34	0.499173	0.540762	0.731343	12.3561	0.660977	0.467936	2	-0.0998465
REPIN1	4.78091e-36	1.6609e-34	0.553888	0.614787	0.701493	12.4803	0.660938	0.473702	2	-0.0448019
MTURN	8.19154e-44	5.40811e-42	0.353266	0.518907	0.609453	13.8318	0.660784	0.52462	2	0.0455969
PIN1	6.61272e-31	1.30378e-29	0.768911	0.516532	0.835821	11.4998	0.660639	0.502587	2	0.0446469
MAGED1	7.23324e-38	2.93592e-36	0.464731	0.599896	0.676617	12.8097	0.660403	0.483948	3	-0.122623
TBL1XR1	4.2265e-34	1.20516e-32	0.524984	0.477254	0.763682	12.1183	0.660391	0.48896	2	-0.0498863
NBDY	9.18375e-33	2.22748e-31	0.555782	0.4922	0.803483	11.8633	0.660349	0.562487	2	0.212292
CHCHD5	6.9355e-30	1.2399e-28	0.898314	0.529997	0.865672	11.2951	0.660321	0.505522	2	0.0472525
NRAV	7.90643e-44	5.24163e-42	0.373069	0.435809	0.626866	13.8344	0.66023	0.408183	2	-0.494885
MSRB2	1.22758e-38	5.27894e-37	0.40062	0.524911	0.661692	12.9466	0.660185	0.583107	2	0.197654
FAM210B	2.66819e-37	1.01807e-35	0.412211	0.536175	0.689055	12.708	0.660031	0.549728	2	0.138899
GTF2A2	1.43982e-29	2.50099e-28	0.902052	0.560079	0.865672	11.2308	0.659987	0.571995	2	0.237878
CCDC157	4.04447e-39	1.81272e-37	0.475162	0.371159	0.70398	13.0316	0.659951	0.399033	2	-0.926499
SSR4	4.49726e-27	5.91861e-26	2.20694	0.415546	0.9801	10.7114	0.659866	0.50121	3	0.0142059
IQCE	1.54757e-39	7.19981e-38	0.464938	0.474227	0.679104	13.1047	0.659719	0.321575	2	-0.619683
SERPINB3	6.89829e-36	2.3604e-34	1.92643	0.636508	0.718905	12.4511	0.659663	0.23924	3	-0.996242
AGPAT2	3.28998e-31	6.73704e-30	0.734352	0.533223	0.833333	11.5599	0.659621	0.528446	3	0.0621798
GALNT7	4.89335e-44	3.35595e-42	0.334774	0.608871	0.587065	13.8688	0.659481	0.475006	3	-0.238971
SERINC3	1.17793e-32	2.83111e-31	0.564043	0.517632	0.781095	11.8424	0.659395	0.545555	2	0.15989
SPACA9	5.03997e-32	1.1247e-30	0.951875	0.518237	0.860697	11.7199	0.659305	0.310961	2	-0.479793
GLRX5	3.71427e-41	1.99654e-39	0.341591	0.551967	0.614428	13.3847	0.659265	0.555512	3	0.146147
HNRNPUL1	3.87143e-32	8.72498e-31	0.611392	0.533605	0.788557	11.7422	0.659094	0.470583	2	-0.0510738
RALBP1	1.52402e-31	3.22885e-30	0.640473	0.531205	0.81592	11.6258	0.658979	0.570222	3	0.243539
TCF4	1.37014e-36	4.92106e-35	0.452625	0.511563	0.699005	12.5794	0.658976	0.496459	3	-0.110285
AGTRAP	9.62471e-34	2.63125e-32	0.580408	0.529397	0.748756	12.0506	0.658935	0.429525	2	-0.185028
CKS1B	1.20313e-44	9.02975e-43	0.396913	0.770596	0.559701	13.9691	0.658832	0.601998	2	0.611916
TGOLN2	1.28394e-30	2.46724e-29	0.691434	0.493923	0.833333	11.4424	0.658812	0.428237	2	-0.195839
CSNK2B	2.54677e-31	5.28313e-30	0.62407	0.446957	0.820896	11.5818	0.658804	0.581385	5	0.06854
CKLF	1.10218e-40	5.62076e-39	0.392656	0.490934	0.626866	13.3037	0.658743	0.579218	2	-0.0525647
SLC9A3R1	1.2944e-28	2.04318e-27	1.15383	0.532297	0.932836	11.0351	0.658724	0.369539	3	-0.319176
RCC2	3.15965e-40	1.57596e-38	0.406539	0.572474	0.621891	13.2247	0.658598	0.547826	1	-0.743229
MRPL23	2.12757e-30	3.97914e-29	0.728322	0.471861	0.840796	11.3985	0.658475	0.584418	5	0.15742
POP7	2.13435e-37	8.24262e-36	0.403606	0.548115	0.656716	12.7255	0.658425	0.602986	2	0.407144
FUZ	3.33782e-34	9.69125e-33	0.629223	0.437677	0.783582	12.1376	0.658387	0.328124	2	-0.510191
ARF3	7.31446e-32	1.60304e-30	0.582716	0.51108	0.793532	11.6883	0.658381	0.507493	2	0.0301959
TPPP	8.54469e-41	4.41411e-39	0.363143	0.46468	0.634328	13.3227	0.658377	0.416196	2	-0.363801
COA4	3.93322e-33	9.91782e-32	0.541139	0.512053	0.761194	11.934	0.658352	0.507289	3	-0.00438812
TSPAN13	1.06385e-28	1.68932e-27	1.09791	0.549202	0.875622	11.0527	0.65831	0.42318	3	-0.250571
UBE2S	1.1587e-46	9.70316e-45	0.345811	0.739811	0.544776	14.296	0.658282	0.602228	2	0.266086
PPCS	3.14744e-32	7.19525e-31	0.561963	0.506984	0.78607	11.7597	0.658017	0.494572	3	-0.0555751
CBX5	9.11013e-36	3.071e-34	0.463655	0.474714	0.711443	12.4289	0.658003	0.403394	2	-0.365139
FAM104B	2.33022e-33	6.04831e-32	0.609394	0.404561	0.79602	11.9775	0.657992	0.336648	2	-0.514289
PAFAH1B2	2.0576e-38	8.70703e-37	0.397791	0.578968	0.639303	12.9069	0.657966	0.537212	2	0.134584
NAXE	1.15196e-33	3.12246e-32	0.501894	0.529949	0.731343	12.0358	0.657765	0.521688	3	0.0397789
SLC25A6	6.81905e-28	9.85448e-27	1.34694	0.539909	0.91791	10.8847	0.657672	0.365571	3	-0.268079
TRAF3IP1	2.57906e-33	6.61861e-32	0.677466	0.465358	0.793532	11.9691	0.657642	0.284628	2	-0.616786
ISCA2	2.28341e-32	5.28841e-31	0.551965	0.486259	0.768657	11.7868	0.657547	0.467556	2	-0.090726
LMAN2	6.75916e-28	9.77682e-27	1.06604	0.50999	0.925373	10.8855	0.657411	0.496242	3	-0.0095189
BORCS7	8.41752e-34	2.32116e-32	0.500968	0.476755	0.738806	12.0617	0.657373	0.449187	2	-0.165318
RPGRIP1L	1.2231e-42	7.39954e-41	0.362561	0.437913	0.619403	13.636	0.65735	0.356023	2	-0.574426
RIBC2	3.87046e-40	1.90659e-38	0.525418	0.623524	0.631841	13.2094	0.657252	0.380436	2	-0.359566
B9D1	2.67075e-30	4.92402e-29	1.08785	0.51875	0.895522	11.3787	0.657028	0.374388	2	-0.361619
AGO2	4.45761e-38	1.84701e-36	0.403708	0.53212	0.641791	12.8472	0.657008	0.52349	2	0.128228
UBXN10	1.57648e-32	3.73264e-31	0.772083	0.436751	0.853234	11.8179	0.656976	0.248681	2	-0.6709
DHRS4L2	1.53856e-54	1.89767e-52	0.261348	0.629753	0.5	15.5077	0.656954	0.588733	2	0.27852
REEP3	1.28832e-31	2.75147e-30	0.675874	0.499457	0.803483	11.6401	0.656913	0.436818	3	-0.241798
CHCHD2	5.34184e-26	6.16792e-25	2.63338	0.368517	1	10.4799	0.656778	0.561033	5	0.220214
SMYD2	1.25142e-33	3.38053e-32	0.59522	0.442951	0.773632	12.029	0.656738	0.264	2	-0.698706
RPL39L	1.30556e-64	3.29727e-62	0.392059	1.41737	0.430348	16.9321	0.656722	0.615426	2	1.15613
MFSD14B	1.01479e-37	4.01357e-36	0.388758	0.542644	0.641791	12.7834	0.656713	0.483439	2	-0.0564206
BMPR1B	4.06486e-44	2.812e-42	0.322486	0.590001	0.572139	13.8821	0.656586	0.4961	3	-0.175535
IER3IP1	1.63009e-35	5.38099e-34	0.408601	0.482617	0.686567	12.3823	0.656457	0.54425	3	0.088845
WDR26	4.40455e-34	1.25144e-32	0.441461	0.433364	0.728856	12.1149	0.656422	0.497136	2	-0.0429841
GALNT1	4.35943e-38	1.81104e-36	0.395234	0.568589	0.631841	12.8489	0.656404	0.563561	2	0.271743
SEC16A	1.57781e-35	5.21924e-34	0.409925	0.456632	0.69403	12.3849	0.65638	0.489543	2	-0.0650495
ERLEC1	1.19806e-28	1.89865e-27	0.837013	0.501867	0.88806	11.042	0.656211	0.474506	2	-0.0556133
[truncated: 1,209 more rows]

## Sheet: Sheet7
Cl01	Cl02	Cl03	Cl04	Cl05	Cl06
[truncated: 100 more rows]
